# Supplementary material for: Intrinsic DNA binding properties demonstrated for lineage-specifying basic helix-loop-helix transcription factors
Source: HighWire-hosted journal article supplement (doi:10.1101/gr.224360.117), 2018-03-02
Supplement: Supplemental_Table_S1.xlsx [file Supplemental_Table_S1.xlsx]

## Sheet: Legend
Legend:
ASCL1_ChIP-seq sheet contains ASCL1 binding sites over input sample in ASCL1-induced ES cells after 24hrs
ASCL2_ChIP-seq sheet contains ASCL2 binding sites that are filtered from FLAG control samples and contain an ebox in 100bp around the center
MYOD1_ChIP-seq sheet contains MYOD binding sites that are filtered from FLAG control samples and contain an ebox in 100bp around the center
ASCL1_ATAC-seq sheet contains enriched regions in ASCL1 induced ESC samples over un-induced samples
ASCL2_ATAC-seq sheet contains enriched regions in ASCL2 induced ESC samples over un-induced samples
MYOD1_ATAC-seq sheet contains enriched regions in MYOD induced ESC samples over un-induced samples
ASCL1_H3K27ac sheet contains enriched regions in ASCL1 induced samples over un-induced samples
ASCL2_H3K27ac sheet contains enriched regions in ASCL2 induced samples over un-induced samples
MYOD1_H3K27ac sheet contains enriched regions in MYOD induced samples over un-induced samples

## Sheet: ASCL1_ChIP-seq
Chr	Start	End	PeakID	GREAT_targets
chr1	3671694	3671862	chr1-91	Xkr4 (-280)
chr1	4802613	4802781	chr1-60	Mrpl15 (-16958), Lypla1 (-5126)
chr1	7777276	7777444	chr1-194	Pcmtd1 (+688440)
chr1	9671578	9671746	chr1-195	2610203C22Rik (-40570), Mybl1 (+28547)
chr1	9997753	9997921	chr1-117	Gm10567 (-35028), Ppp1r42 (+11299)
chr1	11395523	11395691	chr1-45	A830018L16Rik (-18505), Prex2 (+402142)
chr1	11416476	11416644	chr1-196	A830018L16Rik (+2448)
chr1	12644724	12644892	chr1-118	Sulf1 (-47622)
chr1	12814493	12814661	chr1-53	Sulf1 (+122147), Slco5a1 (+176600)
chr1	15017611	15017779	chr1-161	Kcnb2 (-269564), Trpa1 (-98833)
chr1	15118189	15118357	chr1-197	Trpa1 (-199411), Kcnb2 (-168986)
chr1	16824857	16825025	chr1-137	Ly96 (+136485), Jph1 (+272948)
chr1	17250892	17251060	chr1-92	Pi15 (-350925), Gdap1 (+105614)
chr1	17506821	17506989	chr1-39	Pi15 (-94996), Gdap1 (+361543)
chr1	17846485	17846653	chr1-163	Crispld1 (+119481), Crisp4 (+290482)
chr1	20058437	20058605	chr1-35	Pkhd1 (+559543), Tfap2b (+849607)
chr1	26907973	26908141	chr1-79	4931408C20Rik (-220597)
chr1	27108856	27109024	chr1-26	4931408C20Rik (-421480)
chr1	30634864	30635032	chr1-198	Gm9898 (+85013)
chr1	33455360	33455528	chr1-199	Gm5415 (-908151), Prim2 (+214342)
chr1	34537026	34537194	chr1-200	Cfc1 (+1462), Prss40 (+23810)
chr1	35995921	35996089	chr1-11	Hs6st1 (-72395)
chr1	36030487	36030655	chr1-201	Hs6st1 (-37829)
chr1	36061250	36061418	chr1-40	Hs6st1 (-7066)
chr1	36251520	36251688	chr1-27	Uggt1 (-7299), Neurl3 (+21821)
chr1	36580162	36580330	chr1-1	Sema4c (-22720), Fam178b (+102937)
chr1	37492992	37493160	chr1-165	Mgat4a (+47940), Unc50 (+62906)
chr1	37546959	37547127	chr1-203	Mgat4a (-6027), 2010300C02Rik (+173042)
chr1	38797039	38797207	chr1-93	Aff3 (-132168), Lonrf2 (+38967)
chr1	38834789	38834957	chr1-204	Aff3 (-169918), Lonrf2 (+1217)
chr1	38904287	38904455	chr1-205	Nms (-34778), Chst10 (-6211)
chr1	39122673	39122841	chr1-166	Npas2 (-71455), Pdcl3 (+134943)
chr1	39192356	39192524	chr1-94	Npas2 (-1772)
chr1	39430204	39430372	chr1-102	Tbc1d8 (+48459), Rpl31 (+62437)
chr1	39478004	39478172	chr1-15	Tbc1d8 (+659)
chr1	43136554	43136722	chr1-24	Fhl2 (+27323), AI597479 (+37928)
chr1	44331916	44332084	chr1-207	Gulp1 (-219511), Mettl21e (-113039)
chr1	46849844	46850012	chr1-103	Slc39a10 (+4118), Dnahc7c (+240967)
chr1	47076574	47076742	chr1-104	Slc39a10 (-222612)
chr1	51535174	51535342	chr1-208	Nabp1 (-56859), Myo1b (+380670)
chr1	52953177	52953345	chr1-138	1700019D03Rik (-417)
chr1	53750102	53750270	chr1-61	Dnahc7a (-43402), Stk17b (+35038)
chr1	54283151	54283319	chr1-209	Ccdc150 (+32552), Gtf3c3 (+155736)
chr1	54485005	54485173	chr1-17	Gtf3c3 (-46118), Pgap1 (+72595)
chr1	54754484	54754652	chr1-34	Pgap1 (-196884), Ankrd44 (+171819)
chr1	55524074	55524242	chr1-5	Plcl1 (+117770)
chr1	58762688	58762856	chr1-62	Casp8 (-32602), Cflar (+51212)
chr1	59376359	59376527	chr1-168	Fzd7 (-105704), Cdk15 (+119536)
chr1	59423003	59423171	chr1-33	Fzd7 (-59060), Cdk15 (+166180)
chr1	59476757	59476925	chr1-211	Fzd7 (-5306), Cdk15 (+219934)
chr1	59697838	59698006	chr1-25	Bmpr2 (-66357), Nop58 (+12916)
chr1	60047551	60047719	chr1-212	Ica1l (-4548)
chr1	60432631	60432799	chr1-106	Abi2 (+23096), Raph1 (+134050)
chr1	60435615	60435783	chr1-213	Abi2 (+26080), Raph1 (+131066)
chr1	60852888	60853056	chr1-72	Ctla4 (-56053), Cd28 (+106614)
chr1	63110637	63110805	chr1-54	Ino80d (+3546), Nrp2 (+407019)
chr1	64196085	64196253	chr1-21	Creb1 (-336635), Klf7 (-74780)
chr1	64226394	64226562	chr1-214	Creb1 (-306326), Klf7 (-105089)
chr1	64299181	64299349	chr1-63	Creb1 (-233539), Klf7 (-177876)
chr1	64655580	64655748	chr1-107	Mettl21a (-38496), Ccnyl1 (-35681)
chr1	64949512	64949680	chr1-139	Fzd5 (-211846), Plekhm3 (+7228)
chr1	65232142	65232310	chr1-80	Pth2r (-79031), Pikfyve (+45476)
chr1	65269536	65269704	chr1-215	Pth2r (-41637), Pikfyve (+82870)
chr1	66700674	66700842	chr1-140	Rpe (-73)
chr1	67984992	67985160	chr1-216	Cps1 (+862050)
chr1	68049882	68050050	chr1-169	Cps1 (+926940)
chr1	71673774	71673942	chr1-217	Fn1 (-20687), Mreg (+538449)
chr1	72806256	72806424	chr1-170	Igfbp2 (-18163), Rpl37a (+95080)
chr1	72960299	72960467	chr1-171	Igfbp5 (-85499), Tnp1 (+55516)
chr1	74106312	74106480	chr1-13	Tns1 (+18051)
chr1	74295725	74295893	chr1-120	Tmbim1 (+8552), Pnkd (+10764)
chr1	74361421	74361589	chr1-220	Gm216 (-603)
chr1	74424080	74424248	chr1-3	Rqcd1 (-81894), Vil1 (+14788)
chr1	74803111	74803279	chr1-121	Cdk5r2 (-51834), Wnt10a (+11679)
chr1	74824959	74825127	chr1-46	Cdk5r2 (-29986), Wnt10a (+33527)
chr1	74854858	74855026	chr1-141	Cdk5r2 (-87)
chr1	74898787	74898955	chr1-108	Cryba2 (-5728), Ccdc108 (+36728)
chr1	75209862	75210030	chr1-173	Stk16 (-892), Glb1l (+832)
chr1	75477515	75477683	chr1-122	Tmem198 (-1981), Chpf (+1672)
chr1	75506545	75506713	chr1-174	Inha (-448), Obsl1 (-268)
chr1	75662748	75662916	chr1-73	Slc4a3 (+116566)
chr1	78657533	78657701	chr1-175	Utp14b (-823), Acsl3 (-208)
chr1	81744550	81744718	chr1-221	Gm9747 (-488478), Nyap2 (+667317)
chr1	83570285	83570453	chr1-222	Sphkap (-162169), Pid1 (+714276)
chr1	83706945	83707113	chr1-223	Sphkap (-298829), Pid1 (+577616)
chr1	84840489	84840657	chr1-142	Trip12 (-1269), Fbxo36 (+732)
chr1	84868958	84869126	chr1-41	Fbxo36 (+29201), Slc16a14 (+66083)
chr1	86199149	86199317	chr1-110	B3gnt7 (-103988), Armc9 (+44423)
chr1	86434470	86434638	chr1-42	Ptma (-92182), 1700019O17Rik (+8225)
chr1	86503364	86503532	chr1-95	Ptma (-23288), 1700019O17Rik (+77119)
chr1	86509505	86509673	chr1-43	Ptma (-17147), 1700019O17Rik (+83260)
chr1	86532026	86532194	chr1-111	Ptma (+5374), Pde6d (+50437)
chr1	86758083	86758251	chr1-83	Dis3l2 (+54363), Alppl2 (+331761)
chr1	87327433	87327601	chr1-37	Gigyf2 (+514)
chr1	88924256	88924424	chr1-48	Arl4c (-222119), Sh3bp4 (-146075)
chr1	89487831	89487999	chr1-57	D130058E05Rik (-442319), Agap1 (+33104)
chr1	89628402	89628570	chr1-96	D130058E05Rik (-301748), Agap1 (+173675)
chr1	89870600	89870768	chr1-112	D130058E05Rik (-59550), Agap1 (+415873)
chr1	89931101	89931269	chr1-84	D130058E05Rik (+951)
chr1	89998790	89998958	chr1-36	Gbx2 (-65584), Asb18 (+15703)
chr1	90405076	90405244	chr1-97	Cops8 (-198265), Cxcr7 (+201180)
chr1	91369518	91369686	chr1-229	Fam132b (+3172), Ilkap (+29181)
chr1	91413278	91413446	chr1-74	Hes6 (-140)
chr1	91414160	91414328	chr1-12	Hes6 (-1022)
chr1	92313929	92314097	chr1-113	Hdac4 (-165620), Ndufa10 (+159847)
chr1	92348565	92348733	chr1-98	Hdac4 (-200256), Ndufa10 (+125211)
chr1	92365648	92365816	chr1-49	Hdac4 (-217339), Ndufa10 (+108128)
chr1	92432336	92432504	chr1-230	Hdac4 (-284027), Ndufa10 (+41440)
chr1	93305930	93306098	chr1-99	Mterfd2 (-99)
chr1	94342656	94342824	chr1-232	Fam174a (-970888), Pdcd1 (-290187)
chr1	97187277	97187445	chr1-233	Slco6c1 (-59108), D1Ertd622e (+474315)
chr1	99779772	99779940	chr1-234	Cntnap5b (+7091)
chr1	100878012	100878180	chr1-179	NONE
chr1	101756585	101756753	chr1-126	NONE
chr1	102264508	102264676	chr1-180	NONE
chr1	106072220	106072388	chr1-236	Phlpp1 (-99448), Zcchc2 (+81615)
chr1	106278652	106278820	chr1-148	Phlpp1 (+106984), Bcl2 (+435538)
chr1	108134816	108134984	chr1-237	Serpinb8 (+544894)
chr1	118759358	118759526	chr1-29	Tfcp2l1 (+131497), Gli2 (+294177)
chr1	118828708	118828876	chr1-150	Tfcp2l1 (+200847), Gli2 (+224827)
chr1	119049978	119050146	chr1-127	Gli2 (+3557), Tfcp2l1 (+422117)
chr1	120210929	120211097	chr1-14	Steap3 (+60069), 3110009E18Rik (+89818)
chr1	124032067	124032235	chr1-238	Dpp10 (+13408)
chr1	125390052	125390220	chr1-75	Actr3 (+45591)
chr1	125560183	125560351	chr1-239	Slc35f5 (-749)
chr1	125808574	125808742	chr1-64	Lypd1 (+103556), Gpr39 (+131663)
chr1	130984599	130984767	chr1-128	Il19 (-45442), Il10 (-35162)
chr1	131078775	131078943	chr1-129	Mapkapk2 (+18684), Il10 (+59014)
chr1	131178879	131179047	chr1-65	Eif2d (+25782), Rassf5 (+66295)
chr1	131536430	131536598	chr1-240	Avpr1b (-62725), Fam72a (+8611)
chr1	132587047	132587215	chr1-151	Cntn2 (-44191), Nfasc (+154666)
chr1	132736425	132736593	chr1-130	Cntn2 (-193569), Nfasc (+5288)
chr1	132810015	132810183	chr1-241	Lrrn2 (-70174), Nfasc (-68302)
chr1	132853425	132853593	chr1-85	Nfasc (-111712), Lrrn2 (-26764)
chr1	132890791	132890959	chr1-50	Lrrn2 (+10602), Mdm4 (+134473)
chr1	133693698	133693866	chr1-66	Lax1 (-3674)
chr1	133793213	133793381	chr1-242	Lax1 (-103189), Atp2b4 (+7744)
chr1	133798584	133798752	chr1-152	Lax1 (-108560), Atp2b4 (+2373)
chr1	134061256	134061424	chr1-76	Btg2 (+17780), Fmod (+24086)
chr1	134067299	134067467	chr1-67	Btg2 (+11737), Fmod (+30129)
chr1	134512766	134512934	chr1-243	Rabif (+18190), 4931440L10Rik (+36832)
chr1	135248571	135248739	chr1-16	Elf3 (+9817), Gm4204 (+16610)
chr1	135668396	135668564	chr1-19	Nav1 (-83125), Nav1 (+19625)
chr1	135698404	135698572	chr1-244	Csrp1 (-21573), Nav1 (-10383)
chr1	136552844	136553012	chr1-245	Zfp281 (-71973), Kif14 (+84970)
chr1	138154179	138154347	chr1-131	Ptprc (+21042), A130050O07Rik (+226093)
chr1	138963264	138963432	chr1-132	Dennd1b (-361)
chr1	146322942	146323110	chr1-153	Fam5c (-172603)
chr1	146427014	146427182	chr1-30	Fam5c (-68531)
chr1	151943226	151943394	chr1-181	1700025G04Rik (+147010), Edem3 (+187936)
chr1	152572950	152573118	chr1-114	Rgl1 (+52183), Colgalt2 (+173204)
chr1	153071700	153071868	chr1-28	Lamc2 (+114663), Nmnat2 (+116683)
chr1	153493510	153493678	chr1-86	Dhx9 (-5934), Npl (+56120)
chr1	153641552	153641720	chr1-58	Npl (-91922), Rgs8 (-11389)
chr1	153677670	153677838	chr1-247	Rgs16 (-62595), Rgs8 (+24729)
chr1	153733388	153733556	chr1-68	Rgs16 (-6877), Rgs8 (+80447)
chr1	154150113	154150281	chr1-87	Zfp648 (-50990), A930039A15Rik (+244896)
chr1	154357651	154357819	chr1-248	Zfp648 (+156548), Cacna1e (+368185)
chr1	154758928	154759096	chr1-9	Cacna1e (-33092), Ier5 (+340624)
chr1	154759471	154759639	chr1-38	Cacna1e (-33635), Ier5 (+340081)
chr1	155212600	155212768	chr1-154	BC034090 (+20040), Stx6 (+53981)
chr1	155315140	155315308	chr1-249	BC034090 (-82500), Xpr1 (+102085)
chr1	155973747	155973915	chr1-182	Cep350 (-944)
chr1	157101556	157101724	chr1-155	Ralgps2 (-162014), Tex35 (+7005)
chr1	158456405	158456573	chr1-184	Astn1 (+94185), Pappa2 (+501878)
chr1	158769550	158769718	chr1-251	Pappa2 (+188733), Astn1 (+407330)
chr1	161097079	161097247	chr1-44	Cenpl (+26396), Klhl20 (+34348)
chr1	164018086	164018254	chr1-252	Sele (-30064), Mettl18 (+23281)
chr1	165911666	165911834	chr1-31	Pou2f1 (+90928), Cd247 (+123027)
chr1	166155191	166155359	chr1-88	Gpa33 (+25037), Mael (+83469)
chr1	167002589	167002757	chr1-254	Fam78b (+1256), Uck2 (+221246)
chr1	167290072	167290240	chr1-157	Tmco1 (-18514), Uck2 (-5029)
chr1	170502880	170503048	chr1-255	Nos1ap (+86897), 1700015E13Rik (+194161)
chr1	170655636	170655804	chr1-8	Olfml2b (+11188), Atf6 (+212051)
chr1	171415919	171416087	chr1-256	Tstd1 (-3030)
chr1	171559278	171559446	chr1-186	Cd244 (+169)
chr1	172098054	172098222	chr1-259	Pex19 (-28617), Ncstn (-15343)
chr1	172425396	172425564	chr1-260	Slamf9 (-49878), Pigm (+48949)
chr1	174808191	174808359	chr1-261	Grem2 (+113544), Fmn2 (+306450)
chr1	175512328	175512496	chr1-7	Rgs7 (-21282), Fh1 (+113223)
chr1	176749395	176749563	chr1-262	Pld5 (-474181), Cep170 (+57645)
chr1	176974872	176975040	chr1-20	Sdccag8 (+160296), Akt3 (+283247)
chr1	176997967	176998135	chr1-115	Sdccag8 (+183391), Akt3 (+260152)
chr1	178696930	178697098	chr1-263	Kif26b (+167889), Smyd3 (+821020)
chr1	179072260	179072428	chr1-10	Smyd3 (+445690), Kif26b (+543219)
chr1	179951688	179951856	chr1-187	Ahctf1 (-148092), Cdc42bpa (-8813)
chr1	180279820	180279988	chr1-133	Itpkb (-50581), Psen2 (-26766)
chr1	180889989	180890157	chr1-188	Lefty2 (-3035)
chr1	180933764	180933932	chr1-116	Lefty1 (-1174)
chr1	181256454	181256622	chr1-264	Cnih3 (-96090), Wdr26 (-44986)
chr1	181853102	181853270	chr1-51	Lbr (-10785), Enah (+166794)
chr1	181923690	181923858	chr1-265	Lbr (-81373), Enah (+96206)
chr1	182019824	182019992	chr1-189	Enah (+72)
chr1	182182031	182182199	chr1-52	Vmn1r1 (-23796), Degs1 (+100689)
chr1	182489842	182490010	chr1-134	Capn2 (+27569), Trp53bp2 (+80754)
chr1	182585303	182585471	chr1-190	Capn8 (+20380), 4922505E12Rik (+163793)
chr1	185879153	185879321	chr1-89	Lyplal1 (+238073), Slc30a10 (+424389)
chr1	185984903	185985071	chr1-22	Lyplal1 (+132323), Slc30a10 (+530139)
chr1	187171533	187171701	chr1-100	Spata17 (+43829), D1Pas1 (+204201)
chr1	187172024	187172192	chr1-23	Spata17 (+43338), D1Pas1 (+204692)
chr1	188682173	188682341	chr1-158	Kctd3 (+325583), Ush2a (+419223)
chr1	189064937	189065105	chr1-135	Kctd3 (-57181), Kcnk2 (+278332)
chr1	189682039	189682207	chr1-191	Kcnk2 (-338770), Cenpf (+5963)
chr1	189761888	189762056	chr1-136	Ptpn14 (+33704), Smyd2 (+160391)
chr1	189830711	189830879	chr1-159	Smyd2 (+91568), Ptpn14 (+102527)
chr1	189883052	189883220	chr1-101	Smyd2 (+39227), Ptpn14 (+154868)
chr1	189991204	189991372	chr1-2	Smyd2 (-68925), Prox1 (+179392)
chr1	190161427	190161595	chr1-59	Smyd2 (-239148), Prox1 (+9169)
chr1	190448365	190448533	chr1-4	Prox1 (-277769), Rps6kc1 (+463321)
chr1	191435552	191435720	chr1-69	Ppp2r5a (-38595), Dtl (+139898)
chr1	192455143	192455311	chr1-77	Kcnh1 (+264443), Hhat (+315986)
chr1	192834776	192834944	chr1-160	A730013G03Rik (-141)
chr1	193036037	193036205	chr1-78	Syt14 (-423)
chr1	193300482	193300650	chr1-267	Lamb3 (-1391)
chr1	194223122	194223290	chr1-192	Camk1g (-852909), Plxna2 (-396623)
chr1	194746980	194747148	chr1-90	Cd34 (-191757), Plxna2 (+127235)
chr10	3941058	3941226	chr10-36	Mthfd1l (-31989), Plekhg1 (+200778)
chr10	3941533	3941701	chr10-116	Mthfd1l (-31514), Plekhg1 (+201253)
chr10	4387055	4387223	chr10-50	Zbtb2 (+969)
chr10	5419690	5419858	chr10-85	Syne1 (+130918), Gm10097 (+350582)
chr10	6005944	6006112	chr10-99	Rgs17 (-83628), Gm10945 (+755733)
chr10	7133115	7133283	chr10-100	Ipcef1 (-152823), Cnksr3 (+79038)
chr10	7149925	7150093	chr10-117	Ipcef1 (-169633), Cnksr3 (+62228)
chr10	7582391	7582559	chr10-76	Ulbp1 (-108998), Lrp11 (-7342)
chr10	7617650	7617818	chr10-32	Lrp11 (+27917), Pcmt1 (+45569)
chr10	7619801	7619969	chr10-145	Lrp11 (+30068), Pcmt1 (+43418)
chr10	7628464	7628632	chr10-86	Pcmt1 (+34755), Lrp11 (+38731)
chr10	8287391	8287559	chr10-5	Tab2 (-331245), Ust (+231350)
chr10	9795690	9795858	chr10-13	Samd5 (-120566), Stxbp5 (+105305)
chr10	10458093	10458261	chr10-29	Adgb (-28338), Rab32 (+100056)
chr10	10790630	10790798	chr10-11	Gm10944 (+109366), Grm1 (+291642)
chr10	11801963	11802131	chr10-118	Gm9797 (+192790)
chr10	12160161	12160329	chr10-101	Gm9797 (+550988), Utrn (+701490)
chr10	12773827	12773995	chr10-146	Utrn (+87824)
chr10	13641858	13642026	chr10-25	Pex3 (-88803), Aig1 (+227015)
chr10	13872763	13872931	chr10-147	Aig1 (-3890)
chr10	14967715	14967883	chr10-87	B230364G03Rik (-207079)
chr10	18506790	18506958	chr10-148	Hebp2 (+39202), Nhsl1 (+99199)
chr10	20952043	20952211	chr10-119	Ahi1 (-420)
chr10	21102114	21102282	chr10-102	Myb (+58786), Ahi1 (+149651)
chr10	21686456	21686624	chr10-120	Gm5420 (-4305)
chr10	21826852	21827020	chr10-103	Sgk1 (-55248), Gm5420 (+136091)
chr10	21947470	21947638	chr10-149	Sgk1 (+65370), 4930444G20Rik (+120525)
chr10	24166233	24166401	chr10-58	Moxd1 (-57200), Stx7 (+17000)
chr10	24835082	24835250	chr10-77	Enpp1 (-123008), Enpp3 (+1029)
chr10	25314229	25314397	chr10-51	Epb4.1l2 (-45485), Akap7 (-15149)
chr10	25708099	25708267	chr10-28	Smlr1 (-171911), Tmem200a (+370869)
chr10	26759587	26759755	chr10-78	L3mbtl3 (-385715), Arhgap18 (-12806)
chr10	28800987	28801155	chr10-7	Themis (+132711), 2310057J18Rik (+185232)
chr10	33195955	33196123	chr10-52	Trdn (+112556), Clvs2 (+428730)
chr10	36611479	36611647	chr10-67	Hdac2 (-362981), Hs3st5 (+104744)
chr10	39659503	39659671	chr10-152	Rev3l (-72531), Traf3ip2 (+46653)
chr10	40465745	40465913	chr10-21	Slc22a16 (-104507), Cdk19 (+116521)
chr10	41099824	41099992	chr10-47	Gpr6 (-27623), Fig4 (+203333)
chr10	41404355	41404523	chr10-1	Zbtb24 (-45957), Akd1 (+52728)
chr10	41467437	41467605	chr10-68	Mical1 (-8793), Zbtb24 (+17125)
chr10	41544607	41544775	chr10-53	Cd164 (+25191), Ccdc162 (+164609)
chr10	42163778	42163946	chr10-8	Armc2 (-145482), Foxo3 (+112890)
chr10	42356630	42356798	chr10-123	Foxo3 (-79962), Lace1 (+121851)
chr10	43992208	43992376	chr10-79	Aim1 (+12554), Rtn4ip1 (+90485)
chr10	44114563	44114731	chr10-69	Atg5 (-153711), Aim1 (-109801)
chr10	44607212	44607380	chr10-153	Prep (-459910), Prdm1 (-148609)
chr10	44730805	44730973	chr10-9	Prep (-336317), Prdm1 (-272202)
chr10	45800123	45800291	chr10-61	Hace1 (+222378)
chr10	46689894	46690062	chr10-105	NONE
chr10	47631658	47631826	chr10-22	NONE
chr10	49417498	49417666	chr10-59	Grik2 (+371184)
chr10	52742806	52742974	chr10-89	Pln (-594796), Slc35f1 (+52357)
chr10	57486323	57486491	chr10-62	Hsf2 (+22)
chr10	57675830	57675998	chr10-19	Fabp7 (-108967), Pkib (+43933)
chr10	58368927	58369095	chr10-90	Lims1 (-25362), Gcc2 (+113514)
chr10	58924943	58925111	chr10-70	Sh3rf3 (+111569), Sept10 (+296820)
chr10	59159735	59159903	chr10-159	Sept10 (+62028), Sh3rf3 (+346361)
chr10	60189329	60189497	chr10-127	Chst3 (+29847), Spock2 (+83194)
chr10	60351803	60351971	chr10-107	4632428N05Rik (+5036), Cdh23 (+344603)
chr10	60791116	60791284	chr10-161	Slc29a3 (-38418), Unc5b (+40381)
chr10	61009264	61009432	chr10-27	Unc5b (-177767), Pcbd1 (-79995)
chr10	61365969	61366137	chr10-81	Pald1 (+17470), Prf1 (+68217)
chr10	61473188	61473356	chr10-162	Lrrc20 (-2561)
chr10	62010138	62010306	chr10-91	Gm5424 (-60793), Col13a1 (-31114)
chr10	62136094	62136262	chr10-92	Neurog3 (+3088), Tspan15 (+95040)
chr10	62242394	62242562	chr10-48	Tspan15 (-11260), Tacr2 (-9960)
chr10	62577909	62578077	chr10-164	2510003E04Rik (+464)
chr10	62862506	62862674	chr10-63	Ccar1 (-70222), Tet1 (+36528)
chr10	63157492	63157660	chr10-93	Mypn (+46376), Atoh7 (+57420)
chr10	67549278	67549446	chr10-49	Ado (-407)
chr10	67979623	67979791	chr10-94	Rtkn2 (+109)
chr10	69817076	69817244	chr10-166	Ccdc6 (-279961), Ank3 (+283388)
chr10	69839855	69840023	chr10-167	Ccdc6 (-257182), Ank3 (+306167)
chr10	70060111	70060279	chr10-54	Ccdc6 (-36926), Ank3 (+526423)
chr10	71479949	71480117	chr10-168	Ipmk (+132270)
chr10	72588669	72588837	chr10-12	Zwint (-66142)
chr10	74105695	74105863	chr10-169	Gnaz (-861398), Pcdh15 (+283896)
chr10	74920879	74921047	chr10-108	Gnaz (-46214)
chr10	75002625	75002793	chr10-109	Rtdr1 (+29877), Gnaz (+35532)
chr10	76389559	76389727	chr10-170	Dip2a (-44383), Pcnt (+53269)
chr10	76599525	76599693	chr10-171	Ftcd (+23961), Col6a2 (+24021)
chr10	77082537	77082705	chr10-172	Col18a1 (+31084), Slc19a1 (+49409)
chr10	77130145	77130313	chr10-15	Pofut2 (-129071), Col18a1 (-16524)
chr10	77197483	77197651	chr10-39	Col18a1 (-83862), Pofut2 (-61733)
chr10	77690453	77690621	chr10-14	Gm19402 (+220)
chr10	77742327	77742495	chr10-173	Gm10100 (+15925), Gm3233 (+17271)
chr10	77787956	77788124	chr10-174	Gm7137 (+160)
chr10	77814742	77814910	chr10-40	Gm9507 (-2983), Gm2696 (+144)
chr10	77836031	77836199	chr10-17	Gm10318 (-16747), Tspear (+6648)
chr10	77847637	77847805	chr10-3	Gm10318 (-5141), Tspear (+18254)
chr10	79200088	79200256	chr10-175	Vmn2r81 (-47605), Vmn2r80 (+51375)
chr10	79768438	79768606	chr10-110	Rnf126 (-1570)
chr10	80161278	80161446	chr10-129	Cirbp (-6416), Midn (+13090)
chr10	80161694	80161862	chr10-42	Cirbp (-6000), Midn (+13506)
chr10	80577540	80577708	chr10-178	Klf16 (-303)
chr10	80606301	80606469	chr10-179	Adat3 (+364)
chr10	81242115	81242283	chr10-41	Matk (-15100), Zfr2 (+9044)
chr10	81285680	81285848	chr10-72	Tjp3 (+5503), Apba3 (+17592)
chr10	81287787	81287955	chr10-131	Tjp3 (+3396), Apba3 (+19699)
chr10	81334445	81334613	chr10-33	Tbxa2r (+5797), Gipc3 (+8737)
chr10	81413975	81414143	chr10-95	Nfic (+13114), 2210404O07Rik (+21008)
chr10	82096366	82096534	chr10-182	AU041133 (-41803), Zfp873 (+38033)
chr10	82594533	82594701	chr10-132	Gm1553 (-101999), 1190007I07Rik (+28579)
chr10	83346128	83346296	chr10-37	D10Wsu102e (-14009), Slc41a2 (-8330)
chr10	84531681	84531849	chr10-43	Nuak1 (-91168), Ckap4 (+2123)
chr10	84797657	84797825	chr10-111	Ric8b (-119875), Rfx4 (+41679)
chr10	85035258	85035426	chr10-96	Fhl4 (+67153), Ric8b (+117726)
chr10	85215555	85215723	chr10-82	Gm8394 (-97849), Cry1 (-30585)
chr10	85328085	85328253	chr10-2	Btbd11 (-58645), Gm8394 (+14681)
chr10	85421385	85421553	chr10-133	Pwp1 (-450362), Btbd11 (+34655)
chr10	85539513	85539681	chr10-23	Pwp1 (-332234), Btbd11 (+152783)
chr10	86972117	86972285	chr10-60	Stab2 (+35824), Nt5dc3 (+193196)
chr10	87487465	87487633	chr10-134	Ascl1 (+6111), Gm10764 (+196816)
chr10	88708824	88708992	chr10-135	Spic (-25885), Arl1 (-22160)
chr10	90467636	90467804	chr10-83	Anks1b (+594211), Apaf1 (+615050)
chr10	90904267	90904435	chr10-6	Apaf1 (+178419)
chr10	91429207	91429375	chr10-73	Tmpo (-257709)
chr10	93279165	93279333	chr10-183	Elk3 (+31886), Cdk17 (+118373)
chr10	94514195	94514363	chr10-185	Tmcc3 (-578)
chr10	94514788	94514956	chr10-186	Tmcc3 (+15)
chr10	95270996	95271164	chr10-55	Plxnc1 (-326502), Cradd (+53017)
chr10	95719549	95719717	chr10-10	4732465J04Rik (-72938), Anapc15-ps (-46182)
chr10	96309221	96309389	chr10-31	Gm20091 (+99733), Gm5426 (+172702)
chr10	99132317	99132485	chr10-112	Dusp6 (-130830), Phxr2 (-6080)
chr10	100740244	100740412	chr10-188	Mgat4c (-941159), 1700017N19Rik (+147942)
chr10	108353050	108353218	chr10-137	Pawr (+20945), Syt1 (+657841)
chr10	110449473	110449641	chr10-18	Nav3 (-449338), E2f7 (-295911)
chr10	110856108	110856276	chr10-64	Csrp2 (-63985), E2f7 (+110724)
chr10	111164566	111164734	chr10-44	Osbpl8 (-152)
chr10	111190789	111190957	chr10-113	Bbs10 (-107806), Osbpl8 (+26071)
chr10	111191123	111191291	chr10-20	Bbs10 (-107472), Osbpl8 (+26405)
chr10	111361969	111362137	chr10-138	Nap1l1 (-118564), Bbs10 (+63374)
chr10	112199209	112199377	chr10-190	Kcnc2 (-71830), Caps2 (+33617)
chr10	113184859	113185027	chr10-114	Atxn7l3b (-255917)
chr10	113224972	113225140	chr10-139	Atxn7l3b (-296030)
chr10	115178190	115178358	chr10-140	Trhde (-376910), Tph2 (+6748)
chr10	115184883	115185051	chr10-26	Tph2 (+55)
chr10	116354474	116354642	chr10-141	Ptprb (+53184), Kcnmb4 (+119320)
chr10	116516298	116516466	chr10-191	Kcnmb4 (-42504), Cnot2 (+65118)
chr10	116577201	116577369	chr10-192	Kcnmb4 (-103407), Cnot2 (+4215)
chr10	116924277	116924445	chr10-193	Myrfl (-27482), Rab3ip (+26019)
chr10	117357538	117357706	chr10-194	Lyz1 (-64754), Cpsf6 (+19348)
chr10	117376944	117377112	chr10-45	Cpsf6 (-58)
chr10	118049320	118049488	chr10-195	Rap1b (-203469), Mdm1 (-92383)
chr10	118122020	118122188	chr10-24	Rap1b (-276169), Mdm1 (-19683)
chr10	119035976	119036144	chr10-196	Dyrk2 (-167157), Cand1 (+203995)
chr10	120171555	120171723	chr10-197	Helb (-58652), Irak3 (+30020)
chr10	121350823	121350991	chr10-38	Tbc1d30 (-39718), Gns (-14183)
chr10	121507464	121507632	chr10-56	Rassf3 (-31298), Tbk1 (+79246)
chr10	121742503	121742671	chr10-198	BC048403 (+2650), Srgap1 (+304728)
chr10	122300273	122300441	chr10-74	Tmem5 (-202986), Avpr1a (-148142)
chr10	122678484	122678652	chr10-46	Ppm1h (-214)
chr10	122884427	122884595	chr10-199	Mon2 (+191994), Ppm1h (+205729)
chr10	123032152	123032320	chr10-34	Mon2 (+44269), Ppm1h (+353454)
chr10	125906611	125906779	chr10-4	Slc16a7 (-577732), Lrig3 (-59524)
chr10	127276388	127276556	chr10-115	Dctn2 (+10210), Mbd6 (+12418)
chr10	127945571	127945739	chr10-97	Sdr9c7 (+47137), Hsd17b6 (+55023)
chr10	128035452	128035620	chr10-65	Naca (+190)
chr10	128097643	128097811	chr10-98	Baz2a (+4944), Rbms2 (+78841)
chr10	128149618	128149786	chr10-66	Rbms2 (+26866), Baz2a (+56919)
chr10	128188569	128188737	chr10-203	Rbms2 (-12085), Gls2 (-5804)
chr10	128705110	128705278	chr10-75	Pmel (-1064), Cdk2 (-143)
chr10	130259505	130259673	chr10-35	Olfr827 (-48440), Neurod4 (+20651)
chr11	3145021	3145189	chr11-8	Sfi1 (+48302)
chr11	3665472	3665640	chr11-338	Morc2a (+16062), Osbp2 (+198347)
chr11	3794622	3794790	chr11-258	Osbp2 (+69197), Morc2a (+145212)
chr11	3932039	3932207	chr11-221	Tcn2 (+36)
chr11	4147234	4147402	chr11-24	Rnf215 (+12116), Ccdc157 (+12973)
chr11	4186455	4186623	chr11-339	Tbc1d10a (-283)
chr11	4279685	4279853	chr11-340	Lif (+22212), Hormad2 (+160976)
chr11	4940352	4940520	chr11-239	Nefh (+7628), Thoc5 (+45093)
chr11	4986888	4987056	chr11-292	Ap1b1 (+148)
chr11	5130451	5130619	chr11-293	Ewsr1 (-31269), Emid1 (+21722)
chr11	5741253	5741421	chr11-167	Urgcp (-187)
chr11	5840433	5840601	chr11-160	Polm (-2501)
chr11	6154161	6154329	chr11-259	Camk2b (-88497), Nudcd3 (+46170)
chr11	6157257	6157425	chr11-341	Camk2b (-91593), Nudcd3 (+43074)
chr11	6389473	6389641	chr11-168	Zmiz2 (+86)
chr11	6650624	6650792	chr11-294	Wap (-12071), Ramp3 (-7813)
chr11	6718645	6718813	chr11-342	Adcy1 (-344760), Ramp3 (+60208)
chr11	8572921	8573089	chr11-50	Tns3 (+91530)
chr11	9116328	9116496	chr11-222	Upp1 (-1691)
chr11	9117153	9117321	chr11-260	Upp1 (-866)
chr11	9263171	9263339	chr11-295	Abca13 (+71313)
chr11	10310083	10310251	chr11-296	Vwc2 (-804056)
chr11	11855132	11855300	chr11-223	Fignl1 (-46254), Ddc (+42928)
chr11	14237663	14237831	chr11-297	NONE
chr11	16602973	16603141	chr11-343	Egfr (-149154), Sec61g (-94573)
chr11	16885140	16885308	chr11-344	Fbxo48 (-66186), Egfr (+133013)
chr11	19794707	19794875	chr11-345	Meis1 (-776077), Spred2 (-129651)
chr11	19836151	19836319	chr11-64	Meis1 (-817521), Spred2 (-88207)
chr11	19851352	19851520	chr11-19	Meis1 (-832722), Spred2 (-73006)
chr11	19989842	19990010	chr11-346	Spred2 (+65484), Actr2 (+122987)
chr11	20113040	20113208	chr11-161	Actr2 (-211)
chr11	20145495	20145663	chr11-102	Rab1 (-56023), Actr2 (-32666)
chr11	20231216	20231384	chr11-162	Cep68 (+18118), Rab1 (+29698)
chr11	20305535	20305703	chr11-261	Cep68 (-56201), Slc1a4 (+27094)
chr11	20585960	20586128	chr11-37	Sertad2 (+42710), Aftph (+155545)
chr11	21615586	21615754	chr11-262	Wdpcp (+43435), Otx1 (+385945)
chr11	22372879	22373047	chr11-15	Tmem17 (-139125), Ehbp1 (-86168)
chr11	22610335	22610503	chr11-263	Tmem17 (+98331), B3gnt2 (+249682)
chr11	23401526	23401694	chr11-200	Usp34 (+94715), Ahsa2 (+96420)
chr11	23659718	23659886	chr11-298	0610010F05Rik (-30775), Pex13 (+6157)
chr11	26372063	26372231	chr11-241	5730522E02Rik (-161581), Fancl (-13988)
chr11	28171372	28171540	chr11-169	Gm6685 (+168411)
chr11	29597246	29597414	chr11-242	Rtn4 (-95617), Rps27a (-49221)
chr11	29603687	29603855	chr11-135	Rtn4 (-89176), Rps27a (-55662)
chr11	29774403	29774571	chr11-152	4931440F15Rik (+51181), Rtn4 (+81540)
chr11	30268056	30268224	chr11-299	Sptbn1 (+29)
chr11	31396840	31397008	chr11-201	Stc2 (-26850), Bod1 (+274961)
chr11	31398746	31398914	chr11-300	Stc2 (-28756), Bod1 (+273055)
chr11	32000358	32000526	chr11-170	Nsg2 (-21)
chr11	32222845	32223013	chr11-265	Mpg (-3582), Rhbdf1 (-629)
chr11	32225920	32226088	chr11-350	Rhbdf1 (-3704), Mpg (-507)
chr11	32619257	32619425	chr11-301	Fbxw11 (-23534), Stk10 (+86036)
chr11	32718562	32718730	chr11-224	Fbxw11 (+75771), 1700008A04Rik (+105959)
chr11	32732648	32732816	chr11-351	Fbxw11 (+89857), 1700008A04Rik (+91873)
chr11	33193787	33193955	chr11-266	Npm1 (-30665), Tlx3 (+9717)
chr11	33557212	33557380	chr11-352	Ranbp17 (-43550), Gabrp (+21661)
chr11	33578747	33578915	chr11-225	Gabrp (+126)
chr11	35086184	35086352	chr11-226	Spdl1 (-252627), Slit3 (-34956)
chr11	35610227	35610395	chr11-3	Pank3 (-159173), Slit3 (+489087)
chr11	36020896	36021064	chr11-227	Wwc1 (-40453)
chr11	36376995	36377163	chr11-244	Wwc1 (-396552), Tenm2 (+858803)
chr11	40050637	40050805	chr11-87	Mat2b (+642053)
chr11	40751045	40751213	chr11-355	Ccng1 (+4182), Nudcd2 (+17462)
chr11	43653153	43653321	chr11-126	Fabp6 (-51697), Pwwp2a (-28761)
chr11	46230411	46230579	chr11-356	Nipal4 (-63987), Fndc9 (-5036)
chr11	46375218	46375386	chr11-302	Cyfip2 (-62944), Itk (+14213)
chr11	47640805	47640973	chr11-303	Sgcd (-261367)
chr11	48502530	48502698	chr11-357	Gnb2l1 (-297746)
chr11	49589041	49589209	chr11-228	Flt4 (-20138), Olfr1380 (+25202)
chr11	50263225	50263393	chr11-189	Ltc4s (-24777), Maml1 (+29002)
chr11	50862978	50863146	chr11-359	Grm6 (+12377), Zfp454 (+24439)
chr11	51176216	51176384	chr11-202	BC049762 (+86651), 9230009I02Rik (+91213)
chr11	51788821	51788989	chr11-360	Sar1b (+25218), Phf15 (+68748)
chr11	51936156	51936324	chr11-229	Phf15 (-78587), Cdkn2aipnl (-31421)
chr11	51943173	51943341	chr11-361	Phf15 (-85604), Cdkn2aipnl (-24404)
chr11	51967714	51967882	chr11-304	Cdkn2aipnl (+137)
chr11	52188548	52188716	chr11-267	Olfr1373 (-43104), Olfr1371 (+25355)
chr11	52224044	52224212	chr11-305	Olfr1371 (-10141), Skp1a (-8061)
chr11	52479631	52479799	chr11-72	Fstl4 (-284919), 9530068E07Rik (+83287)
chr11	53749807	53749975	chr11-112	Irf1 (-20123), Il5 (+29097)
chr11	54630989	54631157	chr11-363	Rapgef6 (+108226), Cdc42se2 (+156602)
chr11	55097890	55098058	chr11-268	Gm2a (-141)
chr11	55264457	55264625	chr11-203	Slc36a1 (+60191), Fat2 (+72023)
chr11	56762793	56762961	chr11-204	Nmur2 (-721867), Gria1 (-248933)
chr11	57912052	57912220	chr11-10	Larp1 (-96928), Hand1 (-79989)
chr11	58443876	58444044	chr11-82	4930504O13Rik (+8963), Gm12253 (+11401)
chr11	59640364	59640532	chr11-29	Mprip (-22047), Olfr225 (+27482)
chr11	59779933	59780101	chr11-366	Pld6 (+7625), Mprip (+117522)
chr11	59993037	59993205	chr11-306	Rasd1 (-28177), Pemt (+43884)
chr11	60127160	60127328	chr11-367	Rai1 (+22231), Srebf1 (+93360)
chr11	60161379	60161547	chr11-163	Rai1 (+56450), Srebf1 (+59141)
chr11	60233399	60233567	chr11-269	Srebf1 (-12879), Tom1l2 (+119422)
chr11	60248587	60248755	chr11-140	Srebf1 (-28067), Tom1l2 (+104234)
chr11	60470723	60470891	chr11-368	Alkbh5 (-67171), Myo15 (+1468)
chr11	60722798	60722966	chr11-147	Flii (+4381), Llgl1 (+23159)
chr11	61081667	61081835	chr11-172	Tnfrsf13b (-45004), Kcnj12 (+15947)
chr11	61410171	61410339	chr11-83	Slc47a1 (-32174), Rnf112 (+43750)
chr11	61411318	61411486	chr11-246	Slc47a1 (-33321), Rnf112 (+42603)
chr11	61529302	61529470	chr11-136	B9d1 (+24242), Epn2 (+50301)
chr11	61781986	61782154	chr11-307	Prpsap2 (-20008), Ulk2 (+73003)
chr11	62248818	62248986	chr11-205	Adora2b (-82)
chr11	62511929	62512097	chr11-21	Cenpv (+27248), Pigl (+53553)
chr11	62598356	62598524	chr11-173	Trpv2 (+23902), Fam211a (+50083)
chr11	62873281	62873449	chr11-190	Tvp23b (-6090), Fbxw10 (+26242)
chr11	63533623	63533791	chr11-174	Hs3st3b1 (+388583), Pmp22 (+404725)
chr11	64027475	64027643	chr11-370	Hs3st3b1 (-105269), Cox10 (+51907)
chr11	65053201	65053369	chr11-308	Elac2 (+74247), 1700086D15Rik (+106605)
chr11	65713712	65713880	chr11-372	Myocd (-443807), Map2k4 (+74501)
chr11	66906276	66906444	chr11-270	Shisa6 (-380396), Pirt (-5621)
chr11	66932836	66933004	chr11-230	Tmem220 (-92234), Pirt (+20939)
chr11	67017904	67018072	chr11-175	Tmem220 (-7166), Pirt (+106007)
chr11	68556007	68556175	chr11-164	Mfsd6l (-95)
chr11	69171732	69171900	chr11-191	Alox12b (+14827), Alox8 (+26027)
chr11	69362102	69362270	chr11-137	Chd3 (+7220), Kcnab3 (+35928)
chr11	69459911	69460079	chr11-48	Kdm6b (-46320), Dnahc2 (+89113)
chr11	69628300	69628468	chr11-374	Fxr2 (-4606)
chr11	69654981	69655149	chr11-132	Sox15 (-249)
chr11	69795878	69796046	chr11-271	Chrnb1 (-19)
chr11	69800185	69800353	chr11-247	Chrnb1 (-4326)
chr11	69965421	69965589	chr11-309	Cldn7 (+109)
chr11	70060655	70060823	chr11-272	Asgr2 (-31905), Asgr1 (+6041)
chr11	70170342	70170510	chr11-375	Slc16a11 (-42326), Clec10a (+3759)
chr11	70174511	70174679	chr11-376	Slc16a11 (-38157), Clec10a (+7928)
chr11	70652198	70652366	chr11-192	Eno3 (-4922), Pfn1 (+2362)
chr11	70724483	70724651	chr11-1	Zfp3 (-39642), Kif1c (+24019)
chr11	71513006	71513174	chr11-273	Nlrp1b (-311634), Wscd1 (-238286)
chr11	72908533	72908701	chr11-377	Atp2a3 (-52552), Zzef1 (+112363)
chr11	73036940	73037108	chr11-120	1200014J11Rik (-10759), Camkk1 (+17981)
chr11	74536311	74536479	chr11-148	Rap1gap2 (+53791), Olfr412 (+171724)
chr11	74876946	74877114	chr11-231	Sgsm2 (+20030), Mnt (+46110)
chr11	75165487	75165655	chr11-183	Hic1 (+3948), Smg6 (+239748)
chr11	75206401	75206569	chr11-32	Rtn4rl1 (+12702), Rpa1 (+141825)
chr11	75572306	75572474	chr11-149	Pitpna (-15707), Slc43a2 (+40278)
chr11	75655585	75655753	chr11-378	Myo1c (-204)
chr11	76287386	76287554	chr11-274	Glod4 (-43745), Nxn (+111670)
chr11	76294954	76295122	chr11-206	Glod4 (-51313), Nxn (+104102)
chr11	76328978	76329146	chr11-2	Glod4 (-85337), Nxn (+70078)
chr11	76351191	76351359	chr11-379	Glod4 (-107550), Nxn (+47865)
chr11	77181011	77181179	chr11-310	Ccdc55 (-102660), Efcab5 (+7873)
chr11	77496932	77497100	chr11-380	Git1 (+3454), Trp53i13 (+16354)
chr11	77763793	77763961	chr11-153	Cryba1 (-38594), Myo18a (-8274)
chr11	78330582	78330750	chr11-312	Unc119 (-12816), Pigs (+2251)
chr11	78411319	78411487	chr11-381	Foxn1 (-24845), Slc13a2 (+10814)
chr11	78624521	78624689	chr11-382	Tmem97 (-73828), Nlk (+72768)
chr11	78956249	78956417	chr11-383	Lgals9 (+28591), Nos2 (+35546)
chr11	79128301	79128469	chr11-193	Lgals9 (-143461), Ksr1 (+18022)
chr11	80508876	80509044	chr11-51	Cdk5r1 (+31914), Myo1d (+271065)
chr11	82305033	82305201	chr11-141	Ccl1 (-125305), Tmem132e (-83783)
chr11	82902033	82902201	chr11-88	Nle1 (+6294), Fndc8 (+9993)
chr11	83233658	83233826	chr11-142	Slfn3 (+42412), Pex12 (+65235)
chr11	83776402	83776570	chr11-208	Hnf1b (-74369), Heatr6 (+22790)
chr11	84332916	84333084	chr11-150	Acaca (+159878), Aatf (+180522)
chr11	84529148	84529316	chr11-384	Lhx1 (-3217)
chr11	85334987	85335155	chr11-385	Bcas3 (-18141), Ppm1d (+23827)
chr11	85658487	85658655	chr11-121	Tbx2 (-173980), Bcas3 (+305359)
chr11	85777355	85777523	chr11-313	Tbx2 (-55112), Bcas3 (+424227)
chr11	85969497	85969665	chr11-248	Tbx4 (+83159), Brip1 (+231612)
chr11	86051528	86051696	chr11-177	Brip1 (+149581), Tbx4 (+165190)
chr11	86322499	86322667	chr11-386	Ints2 (-65033), Med13 (+35019)
chr11	86412619	86412787	chr11-275	Rnft1 (-71954), Med13 (-55101)
chr11	86580488	86580656	chr11-314	Tubd1 (+35581), Vmp1 (+103264)
chr11	87074016	87074184	chr11-184	Gdpd1 (-38)
chr11	87276851	87277019	chr11-209	Ppm1e (+82088), Trim37 (+149858)
chr11	88139634	88139802	chr11-194	Mrps23 (-64670), Cuedc1 (+40572)
chr11	88179458	88179626	chr11-249	Mrps23 (-24846), Cuedc1 (+80396)
chr11	88404444	88404612	chr11-276	1700106J16Rik (+110485), Msi2 (+313573)
chr11	88629868	88630036	chr11-277	Msi2 (+88149), 1700106J16Rik (+335909)
chr11	88689801	88689969	chr11-232	Msi2 (+28216), 1700106J16Rik (+395842)
chr11	88817209	88817377	chr11-388	Msi2 (-99192), Akap1 (+47293)
chr11	88981246	88981414	chr11-389	Trim25 (-18046), Coil (+7395)
chr11	93968199	93968367	chr11-185	Gm20390 (+10), Nme1 (+238)
chr11	93997300	93997468	chr11-278	Tob1 (-214070), Spag9 (+1281)
chr11	94163059	94163227	chr11-154	Tob1 (-48311), Spag9 (+167040)
chr11	94344193	94344361	chr11-315	Ankrd40 (+16276), Abcc3 (+48699)
chr11	94578967	94579135	chr11-391	Chad (+14004), Acsf2 (+22820)
chr11	95057013	95057181	chr11-178	Pdk2 (-15743), Itga3 (+19617)
chr11	95546465	95546633	chr11-210	Nxph3 (-31979), Ngfr (+41186)
chr11	95963502	95963670	chr11-279	B4galnt2 (-48695), Igf2bp1 (+42354)
chr11	96713766	96713934	chr11-211	Snx11 (+63681), Skap1 (+249257)
chr11	96929263	96929431	chr11-7	Prr15l (+23)
chr11	97030414	97030582	chr11-394	Scrn2 (+560)
chr11	97187731	97187899	chr11-212	Kpnb1 (+66)
chr11	97568774	97568942	chr11-179	4933428G20Rik (-68518), Srcin1 (+6357)
chr11	97598413	97598581	chr11-320	Srcin1 (-23282), E130012A19Rik (+31219)
chr11	97671223	97671391	chr11-233	Cisd3 (-14646), Mllt6 (+7893)
chr11	97801828	97801996	chr11-321	B230217C12Rik (-38868), Lasp1 (+2347)
chr11	97944644	97944812	chr11-250	Fbxo47 (-60574), Plxdc1 (+41671)
chr11	98446826	98446994	chr11-151	Grb7 (+76)
chr11	98682505	98682673	chr11-186	Psmd3 (+35)
chr11	99366847	99367015	chr11-213	Krt27 (-15827), Krt28 (+7972)
chr11	99580829	99580997	chr11-214	Krtap1-5 (+103)
chr11	99583346	99583514	chr11-27	Krtap1-5 (-2414), Krtap1-4 (+224)
chr11	99591134	99591302	chr11-38	Krtap1-3 (+121)
chr11	99597874	99598042	chr11-89	Krtap9-3 (+147)
chr11	99627979	99628147	chr11-165	Krtap4-1 (+176)
chr11	99634786	99634954	chr11-33	Krtap4-2 (+214)
chr11	99643790	99643958	chr11-36	Krtap4-7 (+215)
chr11	99658554	99658722	chr11-6	Gm11563 (+321)
chr11	99665547	99665715	chr11-13	Krtap4-6 (+329)
chr11	99772582	99772750	chr11-322	Gm11595 (+247)
chr11	99780055	99780223	chr11-215	Krtap4-8 (+565)
chr11	99785335	99785503	chr11-113	Krtap4-8 (-4715), Krtap4-9 (+219)
chr11	99792767	99792935	chr11-396	Gm11596 (+616)
chr11	99798387	99798555	chr11-216	Gm11569 (+461)
chr11	99804184	99804352	chr11-103	Gm11554 (+178)
chr11	99809625	99809793	chr11-35	Krtap4-13 (+187)
chr11	99815239	99815407	chr11-65	Gm11564 (+343)
chr11	99837145	99837313	chr11-73	2300003K06Rik (+837)
chr11	99846790	99846958	chr11-143	2300003K06Rik (-8808), Krtap4-16 (+4734)
chr11	99851296	99851464	chr11-14	Krtap4-16 (+228)
chr11	99858207	99858375	chr11-17	Gm11568 (+374)
chr11	99864761	99864929	chr11-104	Gm11559 (+369)
chr11	99873652	99873820	chr11-217	Krtap9-1 (+347)
chr11	99879470	99879638	chr11-144	Gm11567 (+367)
chr11	99897580	99897748	chr11-397	Krtap31-1 (-10256), Gm11567 (+18477)
chr11	99948859	99949027	chr11-18	Krtap9-5 (+468)
chr11	99949338	99949506	chr11-9	Krtap9-5 (+947)
chr11	100256384	100256552	chr11-180	Krt16 (-7566), Krt17 (+4561)
chr11	100264504	100264672	chr11-398	Krt17 (-3559)
chr11	100316354	100316522	chr11-399	Eif1 (-3447)
chr11	100616482	100616650	chr11-400	Dnajc7 (+3602), Cnp (+41662)
chr11	100939454	100939622	chr11-280	Stat3 (+2)
chr11	100975338	100975506	chr11-323	Ptrf (-4535)
chr11	101468080	101468248	chr11-281	Vat1 (-1934), Rnd2 (-11)
chr11	101497077	101497245	chr11-196	Rnd2 (+28986), Brca1 (+54718)
chr11	101590201	101590369	chr11-251	Rdm1 (-37657), Tmem106a (+8043)
chr11	101601009	101601177	chr11-187	Rdm1 (-26849), Tmem106a (+18851)
chr11	101682000	101682168	chr11-401	Dhx8 (-50866), Arl4d (+16543)
chr11	101964831	101964999	chr11-282	Meox1 (-70541), Sost (+2100)
chr11	102206612	102206780	chr11-403	G6pc3 (+17027), Hdac5 (+23470)
chr11	102394500	102394668	chr11-218	Slc4a1 (-29304), Slc25a39 (+12960)
chr11	102624314	102624482	chr11-219	Gm1564 (-41190), Fzd2 (+19967)
chr11	102826718	102826886	chr11-405	Gjc1 (-21901), Higd1b (-9494)
chr11	103730607	103730775	chr11-283	Gosr2 (-32793), Wnt9b (+19130)
chr11	105151646	105151814	chr11-284	Tlk2 (-29797), Gm10842 (+4837)
chr11	106606022	106606190	chr11-181	Ern1 (-118310), Tex2 (+6824)
chr11	106674706	106674874	chr11-105	Tex2 (-61860), Pecam1 (+40469)
chr11	107135907	107136075	chr11-406	Bptf (-4069)
chr11	107223115	107223283	chr11-407	Nol11 (-33818), Pitpnc1 (+247500)
chr11	108095120	108095288	chr11-408	Cacng5 (-180149), Prkca (+248724)
chr11	108119872	108120040	chr11-11	Cacng5 (-204901), Prkca (+223972)
chr11	112912998	112913166	chr11-409	Sox9 (+130858), Slc39a11 (+652677)
chr11	112920246	112920414	chr11-410	Sox9 (+138106), Slc39a11 (+645429)
chr11	114650714	114650882	chr11-253	Sdk2 (-584580), Rpl38 (-17811)
chr11	114795317	114795485	chr11-106	Gpr142 (-3523), Btbd17 (+496)
chr11	115258224	115258392	chr11-138	Grin2c (+8935), Tmem104 (+70821)
chr11	115367727	115367895	chr11-254	Hid1 (-55)
chr11	115441533	115441701	chr11-197	Slc16a5 (-20861), 4933422H20Rik (+1072)
chr11	115884345	115884513	chr11-411	Smim6 (-27588), Myo15b (+22817)
chr11	116457386	116457554	chr11-220	Qrich2 (-3123)
chr11	116499989	116500157	chr11-234	Sphk1 (-34667), Prpsap1 (-9725)
chr11	116745495	116745663	chr11-285	St6galnac2 (-50711), St6galnac1 (+29928)
chr11	116885954	116886122	chr11-255	Mgat5b (-32825), Mfsd11 (+32218)
chr11	117403917	117404085	chr11-155	Gm11733 (-80367), Sept9 (+204340)
chr11	117438450	117438618	chr11-235	Gm11733 (-45834), Sept9 (+238873)
chr11	117451682	117451850	chr11-5	Gm11733 (-32602), Sept9 (+252105)
chr11	117475045	117475213	chr11-199	Gm11733 (-9239), Sept9 (+275468)
chr11	117522000	117522168	chr11-236	Tnrc6c (-132729), Gm11733 (+37716)
chr11	117627230	117627398	chr11-256	Tnrc6c (-27499), Gm11733 (+142946)
chr11	117832128	117832296	chr11-288	Birc5 (-17039), Tk1 (-6120)
chr11	117873240	117873408	chr11-328	Tha1 (+135)
chr11	117931083	117931251	chr11-329	Tha1 (-57708), Socs3 (+38019)
chr11	117934378	117934546	chr11-415	Tha1 (-61003), Socs3 (+34724)
chr11	117976391	117976559	chr11-182	Pgs1 (-9817), Socs3 (-7289)
chr11	118348537	118348705	chr11-237	BC100451 (-6121), Timp2 (+6885)
chr11	118349603	118349771	chr11-331	BC100451 (-7187), Timp2 (+5819)
chr11	118376485	118376653	chr11-28	Timp2 (-21063), Lgals3bp (+25523)
chr11	118875131	118875299	chr11-289	Rbfox3 (+34357), Engase (+398386)
chr11	119053121	119053289	chr11-417	Cbx8 (-12236), Cbx4 (+33016)
chr11	119282624	119282792	chr11-22	Gaa (+14821), Eif4a3 (+17381)
chr11	120065403	120065571	chr11-133	Aatk (-18417), Azi1 (+21340)
chr11	120069746	120069914	chr11-418	Aatk (-22760), Azi1 (+16997)
chr11	120344246	120344414	chr11-290	0610009L18Rik (-4348), Actg1 (+4212)
chr11	120852435	120852603	chr11-333	Fasn (-28341), Ccdc57 (+80353)
chr12	3470920	3471088	chr12-95	Dtnb (-101387), Asxl2 (+44147)
chr12	3602889	3603057	chr12-67	Dnmt3a (-204057), Dtnb (+30582)
chr12	3691265	3691433	chr12-46	Dnmt3a (-115681), Dtnb (+118958)
chr12	3889781	3889949	chr12-77	Pomc (-65086), Dnmt3a (+82835)
chr12	6595643	6595811	chr12-96	NONE
chr12	16870082	16870250	chr12-98	Rock2 (-24812), E2f6 (+59201)
chr12	17661619	17661787	chr12-54	Hpcal1 (-29111), Odc1 (+116830)
chr12	21167878	21168046	chr12-29	Asap2 (+56214), Itgb1bp1 (+118275)
chr12	24735104	24735272	chr12-68	Mboat2 (-96411), Rrm2 (+26947)
chr12	25093022	25093190	chr12-48	Id2 (+2986), Kidins220 (+118174)
chr12	25144714	25144882	chr12-37	Id2 (-48706)
chr12	25475517	25475685	chr12-38	Id2 (-379509), Rnf144a (+939655)
chr12	26068202	26068370	chr12-39	Id2 (-972194), Rnf144a (+346970)
chr12	26315150	26315318	chr12-55	Rnf144a (+100022)
chr12	27065084	27065252	chr12-47	Sox11 (+277541), Cmpk2 (+595964)
chr12	27140400	27140568	chr12-23	Sox11 (+202225), Cmpk2 (+671280)
chr12	27724739	27724907	chr12-32	Sox11 (-382114), Dcdc2c (+827480)
chr12	28817422	28817590	chr12-8	Myt1l (-710878), Tssc1 (+65678)
chr12	28972103	28972271	chr12-56	Myt1l (-556197), Tssc1 (+220359)
chr12	29096065	29096233	chr12-79	Myt1l (-432235), Tssc1 (+344321)
chr12	29130133	29130301	chr12-5	Myt1l (-398167), Tssc1 (+378389)
chr12	31059630	31059798	chr12-40	Fam110c (-14254), Sh3yl1 (+148046)
chr12	36933285	36933453	chr12-49	D630036H23Rik (-551188), Meox2 (-175171)
chr12	40400104	40400272	chr12-100	Ifrd1 (-176999), Zfp277 (+45581)
chr12	40917546	40917714	chr12-17	Immp2l (-106460), Dock4 (+471577)
chr12	40995806	40995974	chr12-57	Immp2l (-28200), Dock4 (+549837)
chr12	41729936	41730104	chr12-30	Lrrn3 (-244269)
chr12	42128062	42128230	chr12-101	Lrrn3 (-642395)
chr12	43614323	43614491	chr12-102	Dnajb9 (+595661)
chr12	44981193	44981361	chr12-103	Stxbp6 (+92835), Nrcam (+652392)
chr12	51166105	51166273	chr12-9	Prkd1 (-516966), G2e3 (-182099)
chr12	51911447	51911615	chr12-80	Hectd1 (-81995), Heatr5a (+59790)
chr12	54326676	54326844	chr12-7	Egln3 (-122900), Sptssa (+329812)
chr12	64902678	64902846	chr12-14	Fscb (-427864), Gm527 (-15149)
chr12	69229386	69229554	chr12-69	Pole2 (-1280)
chr12	69476824	69476992	chr12-105	Gm9887 (-104450), Mettl21d (+106120)
chr12	72649945	72650113	chr12-25	Dhrs7 (+14799), Pcnxl4 (+113672)
chr12	72687875	72688043	chr12-58	Ppm1a (-73252), Dhrs7 (-23131)
chr12	72688363	72688531	chr12-24	Ppm1a (-72764), Dhrs7 (-23619)
chr12	73088998	73089166	chr12-59	Six1 (-41903), Six4 (+24955)
chr12	76547933	76548101	chr12-60	Plekhg3 (+14457), Sptb (+162530)
chr12	79548686	79548854	chr12-35	Rad51b (+251419), Zfp36l1 (+564243)
chr12	80213905	80214073	chr12-15	Zfp36l1 (-100976), Actn1 (+46382)
chr12	80736764	80736932	chr12-83	Ccdc177 (+23693), Plekhd1 (+44257)
chr12	82298778	82298946	chr12-70	Sipa1l1 (-12487), Pcnx (+438832)
chr12	82616780	82616948	chr12-42	Gm10006 (-1161)
chr12	83523744	83523912	chr12-108	Dcaf4 (+3362), Zfyve1 (+73319)
chr12	83972173	83972341	chr12-84	Acot2 (-15604), 2410016O06Rik (+21649)
chr12	84153296	84153464	chr12-85	Pnma1 (-4891)
chr12	84625132	84625300	chr12-36	Vrtn (-17339), Abcd4 (-7750)
chr12	84729716	84729884	chr12-18	Syndig1l (-30993), Npc2 (+43312)
chr12	86167305	86167473	chr12-71	Gpatch2l (-74501), Ift43 (+84828)
chr12	86466315	86466483	chr12-20	Vash1 (-212301), Esrrb (+44755)
chr12	86493399	86493567	chr12-51	Vash1 (-185217), Esrrb (+71839)
chr12	86498794	86498962	chr12-43	Vash1 (-179822), Esrrb (+77234)
chr12	86793820	86793988	chr12-109	Gm6772 (+59521), Irf2bpl (+90910)
chr12	86804858	86805026	chr12-87	Gm6772 (+70559), Irf2bpl (+79872)
chr12	88905081	88905249	chr12-110	Nrxn3 (+110661)
chr12	89825045	89825213	chr12-88	Dio2 (+913309)
chr12	91684362	91684530	chr12-111	Gtf2a1 (-94437), Ston2 (+101990)
chr12	93915023	93915191	chr12-73	Gm9726 (+13995)
chr12	98737598	98737766	chr12-44	Ptpn21 (-3037)
chr12	99067262	99067430	chr12-16	Ttc8 (+146734), Foxn3 (+325726)
chr12	99068101	99068269	chr12-26	Ttc8 (+147573), Foxn3 (+324887)
chr12	99220498	99220666	chr12-61	Foxn3 (+172490), Ttc8 (+299970)
chr12	99272898	99273066	chr12-19	Foxn3 (+120090), Ttc8 (+352370)
chr12	99300093	99300261	chr12-33	Foxn3 (+92895), Ttc8 (+379565)
chr12	99306206	99306374	chr12-89	Foxn3 (+86782), Ttc8 (+385678)
chr12	100168271	100168439	chr12-52	Calm1 (-31080), Nrde2 (-8702)
chr12	100201942	100202110	chr12-45	Calm1 (+2591), Ttc7b (+318796)
chr12	100304359	100304527	chr12-1	Calm1 (+105008), Ttc7b (+216379)
chr12	100337820	100337988	chr12-28	Calm1 (+138469), Ttc7b (+182918)
chr12	100407394	100407562	chr12-34	Ttc7b (+113344), Calm1 (+208043)
chr12	101831294	101831462	chr12-74	Fbln5 (-12323), Trip11 (+81889)
chr12	102189003	102189171	chr12-27	Rin3 (-93961), Slc24a4 (+59913)
chr12	102224235	102224403	chr12-53	Rin3 (-58729), Slc24a4 (+95145)
chr12	102344548	102344716	chr12-6	Rin3 (+61584), Lgmn (+95181)
chr12	102597659	102597827	chr12-62	Chga (+42774), Itpk1 (+107186)
chr12	102787877	102788045	chr12-63	Ubr7 (+29986), Btbd7 (+90445)
chr12	103325488	103325656	chr12-112	Fam181a (+10613), Asb2 (+30429)
chr12	104534681	104534849	chr12-11	Gm10000 (+60277), Dicer1 (+217187)
chr12	104644811	104644979	chr12-22	Dicer1 (+107057), Gm10000 (+170407)
chr12	105006717	105006885	chr12-90	Glrx5 (-25888), Syne3 (-8124)
chr12	105100954	105101122	chr12-91	Glrx5 (+68349), Tcl1 (+121699)
chr12	105550519	105550687	chr12-3	Bdkrb2 (-12569), D430019H16Rik (+96747)
chr12	108293103	108293271	chr12-64	Ccdc85c (-17770), Hhipl1 (-13083)
chr12	108452752	108452920	chr12-65	Evl (-101884), Eml1 (+30020)
chr12	108848206	108848374	chr12-114	Slc25a47 (-2839)
chr12	110481298	110481466	chr12-115	Ppp2r5c (-4357)
chr12	111067725	111067893	chr12-117	Traf3 (-98654), Rcor1 (+28011)
chr12	111136034	111136202	chr12-10	Traf3 (-30345), Rcor1 (+96320)
chr12	111696320	111696488	chr12-13	Bag5 (+16853), Trmt61a (+18299)
chr12	111953900	111954068	chr12-92	Ppp1r13b (-45929), 2010107E04Rik (+12993)
chr12	112206709	112206877	chr12-2	Kif26a (+60558), A730018C14Rik (+216419)
chr12	112837827	112837995	chr12-119	Cdca4 (-8522), Gpr132 (+23005)
chr12	113140337	113140505	chr12-21	Crip2 (+185)
chr12	116405058	116405226	chr12-94	Ncapg2 (-260)
chr13	3642158	3642326	chr13-13	Asb13 (+8210), Calml3 (+162076)
chr13	4125918	4126086	chr13-112	Akr1c18 (+24652), Akr1c14 (+76991)
chr13	5169453	5169621	chr13-133	Klf6 (-691952), Gm5444 (+397888)
chr13	5550291	5550459	chr13-134	Klf6 (-311114), Gm5444 (+778726)
chr13	6000329	6000497	chr13-28	Pitrm1 (-547744), Klf6 (+138924)
chr13	9329462	9329630	chr13-11	Dip2c (+53018), Zmynd11 (+435768)
chr13	9405583	9405751	chr13-135	Dip2c (+129139), Zmynd11 (+359647)
chr13	11005554	11005722	chr13-70	NONE
chr13	11959568	11959736	chr13-71	Ryr2 (+147293)
chr13	12764962	12765130	chr13-81	Prl2c3 (+35032), Gm2399 (+62684)
chr13	12858705	12858873	chr13-82	Prl2c3 (-58711), Prl2c2 (+146594)
chr13	14522219	14522387	chr13-14	Hecw1 (+923)
chr13	14584182	14584350	chr13-138	Hecw1 (-61040), Mrpl32 (+28771)
chr13	17458033	17458201	chr13-139	5033411D12Rik (+236615)
chr13	17700540	17700708	chr13-140	Mplkip (+5211), Cdk13 (+104473)
chr13	18164245	18164413	chr13-141	Vdac3-ps1 (-132700), Pou6f2 (+8225)
chr13	19631056	19631224	chr13-59	Sfrp4 (+7965), Nme8 (+66654)
chr13	20354853	20355021	chr13-117	Aoah (-439182), Elmo1 (+264318)
chr13	21723492	21723660	chr13-118	Hist1h4j (-11486), Hist1h2bm (+1478)
chr13	21939007	21939175	chr13-142	Zfp184 (-6021), Hist1h2br (+105348)
chr13	23024854	23025022	chr13-60	Vmn1r214 (-9356), Vmn1r213 (+13689)
chr13	24845072	24845240	chr13-50	D130043K22Rik (+21)
chr13	24849421	24849589	chr13-144	D130043K22Rik (+4370), Aldh5a1 (+88156)
chr13	25557428	25557596	chr13-145	Nrsn1 (-287430)
chr13	26113551	26113719	chr13-43	Nrsn1 (-843553), Hdgfl1 (+656530)
chr13	29034502	29034670	chr13-29	Sox4 (-80873), Cdkal1 (+821088)
chr13	29210910	29211078	chr13-94	Sox4 (-257281), Cdkal1 (+644680)
chr13	29596849	29597017	chr13-2	Sox4 (-643220), Cdkal1 (+258741)
chr13	29610494	29610662	chr13-72	Sox4 (-656865), Cdkal1 (+245096)
chr13	32801918	32802086	chr13-146	Wrnip1 (-36), D930007J09Rik (+847)
chr13	34741754	34741922	chr13-51	Prpf4b (-133656), Fam50b (+6988)
chr13	36750803	36750971	chr13-149	Nrn1 (-16410), F13a1 (+298326)
chr13	37517497	37517665	chr13-23	Rreb1 (-308734), Ly86 (+172236)
chr13	38109188	38109356	chr13-16	Dsp (-42076), Riok1 (+72283)
chr13	40258854	40259022	chr13-61	Ofcc1 (+29073)
chr13	40669952	40670120	chr13-4	Ofcc1 (-382025), Gm9979 (-33969)
chr13	40816119	40816287	chr13-150	Tfap2a (-82380), Gcnt2 (-70555)
chr13	41249757	41249925	chr13-31	Smim13 (-19)
chr13	43739667	43739835	chr13-96	Cd83 (-45356), Rnf182 (+124041)
chr13	44751822	44751990	chr13-52	Jarid2 (+20635), Dtnbp1 (+250190)
chr13	45306378	45306546	chr13-120	Mylip (-83280), Gm9817 (+227770)
chr13	45463614	45463782	chr13-154	Gmpr (-43746), Mylip (+73956)
chr13	46429085	46429253	chr13-97	Cap2 (-72679), Rbm24 (+10869)
chr13	46619693	46619861	chr13-155	C78339 (-49745), Cap2 (+117929)
chr13	48545588	48545756	chr13-73	A830005F24Rik (+32102), Ptpdc1 (+79901)
chr13	48665108	48665276	chr13-98	Barx1 (+2194), Phf2 (+205693)
chr13	48950558	48950726	chr13-74	Phf2 (-79757), Fam120a (+17375)
chr13	49020321	49020489	chr13-12	Fam120a (-52388), Wnk2 (+127609)
chr13	49112657	49112825	chr13-121	Fam120a (-144724), Wnk2 (+35273)
chr13	49187328	49187496	chr13-122	Ninj1 (-73)
chr13	49188732	49188900	chr13-62	Ninj1 (+1331), 1110007C09Rik (+27210)
chr13	50460585	50460753	chr13-75	Gm806 (-6638), Fbxw17 (+42805)
chr13	50907070	50907238	chr13-30	Spin1 (-193726), Gm8765 (+208825)
chr13	50912876	50913044	chr13-48	Spin1 (-187920), Gm8765 (+214631)
chr13	51378333	51378501	chr13-63	Hist1h2al (-175352), S1pr3 (-30201)
chr13	51631469	51631637	chr13-53	Shc3 (-64469), Cks2 (-13679)
chr13	51748587	51748755	chr13-123	Gm15440 (-47630), Sema4d (+45076)
chr13	51845862	51846030	chr13-156	Gadd45g (-732)
chr13	51846490	51846658	chr13-64	Gadd45g (-104)
chr13	51848734	51848902	chr13-54	Gadd45g (+2140), Diras2 (+682018)
chr13	51918979	51919147	chr13-25	Gadd45g (+72385), Diras2 (+611773)
chr13	51920651	51920819	chr13-6	Gadd45g (+74057), Diras2 (+610101)
chr13	51921336	51921504	chr13-36	Gadd45g (+74742), Diras2 (+609416)
chr13	52062714	52062882	chr13-34	Gadd45g (+216120), Diras2 (+468038)
chr13	52562282	52562450	chr13-157	Diras2 (-31530), Syk (-20807)
chr13	52813335	52813503	chr13-159	Auh (+116242), Syk (+230246)
chr13	52906489	52906657	chr13-160	Auh (+23088), Syk (+323400)
chr13	54216067	54216235	chr13-19	Cplx2 (-155198), Hrh2 (+24022)
chr13	54266581	54266749	chr13-124	Cplx2 (-104684), Hrh2 (+74536)
chr13	54322446	54322614	chr13-44	Cplx2 (-48819), Hrh2 (+130401)
chr13	54565829	54565997	chr13-37	4833439L19Rik (-478)
chr13	54794336	54794504	chr13-161	Unc5a (-154991), Tspan17 (+5043)
chr13	55205579	55205747	chr13-99	Nsd1 (-4119)
chr13	55484671	55484839	chr13-77	Dbn1 (+3356), Prr7 (+20488)
chr13	55504461	55504629	chr13-100	Dbn1 (-16434), Pdlim7 (+8901)
chr13	57949593	57949761	chr13-3	Spock1 (-42090), Klhl3 (+152751)
chr13	58954864	58955032	chr13-26	Ntrk2 (+147048), Agtpbp1 (+602341)
chr13	59096739	59096907	chr13-55	Ntrk2 (+288923), Agtpbp1 (+460466)
chr13	59292968	59293136	chr13-78	Agtpbp1 (+264237), Ntrk2 (+485152)
chr13	59770320	59770488	chr13-101	Isca1 (-594)
chr13	60682594	60682762	chr13-163	Dapk1 (+80731), BC051665 (+103686)
chr13	60752415	60752583	chr13-164	BC051665 (+33865), Dapk1 (+150552)
chr13	63033013	63033181	chr13-165	2010111I01Rik (+18163), Fancc (+398648)
chr13	63272714	63272882	chr13-45	Fancc (+158947), 2010111I01Rik (+257864)
chr13	63980031	63980199	chr13-166	Hsd17b3 (+109086), Ercc6l2 (+164781)
chr13	64101563	64101731	chr13-167	Hsd17b3 (-12446), Slc35d2 (+27683)
chr13	64152304	64152472	chr13-21	Zfp367 (+814)
chr13	64432417	64432585	chr13-38	Cdk20 (-52)
chr13	66715809	66715977	chr13-17	Zfp640 (-42563), Gm17404 (+135620)
chr13	67128006	67128174	chr13-83	Zfp759 (-138)
chr13	67299660	67299828	chr13-126	Zfp458 (-30676), Zfp457 (+6668)
chr13	68573127	68573295	chr13-104	Mtrr (+8910), BC048507 (+709885)
chr13	68942882	68943050	chr13-79	Adcy2 (+56575), 1700001L19Rik (+345527)
chr13	69667337	69667505	chr13-65	Nsun2 (+55405), Ube2ql1 (+72476)
chr13	70168620	70168788	chr13-66	Med10 (+358822), BC018507 (+468930)
chr13	70379297	70379465	chr13-127	BC018507 (+258253), Med10 (+569499)
chr13	70841267	70841435	chr13-49	Adamts16 (+460)
chr13	72817892	72818060	chr13-105	Irx4 (-442521), Irx2 (+189156)
chr13	72938985	72939153	chr13-39	Irx4 (-321428), Irx2 (+310249)
chr13	73290299	73290467	chr13-106	Gm10263 (-27461), Irx4 (+29886)
chr13	84348162	84348330	chr13-46	Tmem161b (+125950), Gm4076 (+779268)
chr13	85036021	85036189	chr13-40	Gm4076 (+91409), Tmem161b (+813809)
chr13	86345385	86345553	chr13-41	Cox7c (-298565)
chr13	87210555	87210723	chr13-172	NONE
chr13	94976553	94976721	chr13-84	Wdr41 (+289)
chr13	95018096	95018264	chr13-27	Wdr41 (+41832), Pde8b (+204886)
chr13	95534246	95534414	chr13-67	F2rl1 (-9090), F2r (+84129)
chr13	95535193	95535361	chr13-42	F2rl1 (-10037), F2r (+83182)
chr13	95535624	95535792	chr13-68	F2rl1 (-10468), F2r (+82751)
chr13	96037443	96037611	chr13-175	Iqgap2 (-145605), Sv2c (+95050)
chr13	96660141	96660309	chr13-18	Hmgcr (+10711), Col4a3bp (+117490)
chr13	97358866	97359034	chr13-128	Enc1 (+117845), Gm10260 (+401638)
chr13	97454851	97455019	chr13-85	Enc1 (+213830), Gm10260 (+305653)
chr13	97507879	97508047	chr13-129	Gm10260 (+252625), Enc1 (+266858)
chr13	99016821	99016989	chr13-56	Zfp366 (-167918), 1700024P04Rik (-32340)
chr13	99038524	99038692	chr13-107	Zfp366 (-146215), 1700024P04Rik (-54043)
chr13	99609408	99609576	chr13-35	Map1b (-92890), Cartpt (+291191)
chr13	99676563	99676731	chr13-57	Map1b (-160045), Cartpt (+224036)
chr13	99940640	99940808	chr13-80	Cartpt (-40041), Mccc2 (+74915)
chr13	100990746	100990914	chr13-1	Slc30a5 (-157403), Pik3r1 (+777387)
chr13	101235370	101235538	chr13-108	Slc30a5 (-402027), Pik3r1 (+532763)
chr13	102393676	102393844	chr13-24	Pik3r1 (-625543), Cd180 (-299798)
chr13	102644089	102644257	chr13-178	Pik3r1 (-875956), Cd180 (-49385)
chr13	102842841	102843009	chr13-20	Cd180 (+149367), Mast4 (+491535)
chr13	102896046	102896214	chr13-47	Cd180 (+202572), Mast4 (+438330)
chr13	104911647	104911815	chr13-86	Fam159b (-47838), Rgs7bp (+143199)
chr13	106874798	106874966	chr13-87	Lrrc70 (-27615), Ipo11 (+62033)
chr13	106972077	106972245	chr13-130	Dimt1 (+25032), Kif2a (+49953)
chr13	107663919	107664087	chr13-69	Zswim6 (+226061), 3830408C21Rik (+632040)
chr13	107668616	107668784	chr13-33	Zswim6 (+221364), 3830408C21Rik (+636737)
chr13	107672346	107672514	chr13-109	Zswim6 (+217634), 3830408C21Rik (+640467)
chr13	107678937	107679105	chr13-5	Zswim6 (+211043), 3830408C21Rik (+647058)
chr13	107858238	107858406	chr13-22	Zswim6 (+31742), 3830408C21Rik (+826359)
chr13	107859943	107860111	chr13-88	Zswim6 (+30037), 3830408C21Rik (+828064)
chr13	107908075	107908243	chr13-179	Smim15 (-138265), Zswim6 (-18095)
chr13	108159693	108159861	chr13-131	Ndufaf2 (-1152), Ercc8 (+1039)
chr13	111765222	111765390	chr13-180	Map3k1 (+43687), Mier3 (+79128)
chr13	111808662	111808830	chr13-110	Map3k1 (+247)
chr13	112001270	112001438	chr13-89	Ankrd55 (-287097), Map3k1 (-192361)
chr13	112365861	112366029	chr13-15	Il6st (-109063), Ankrd55 (+77494)
chr13	112375905	112376073	chr13-90	Il6st (-99019), Ankrd55 (+87538)
chr13	112754893	112755061	chr13-91	Ppap2a (-45917), Slc38a9 (+94211)
chr13	112987478	112987646	chr13-111	Ccno (-240)
chr13	113569678	113569846	chr13-92	Snx18 (+48802), BC067074 (+252678)
chr13	113858768	113858936	chr13-132	Arl15 (+64347), Ndufs4 (+529242)
chr13	118088010	118088178	chr13-183	Mrps30 (+299158), Hcn1 (+485614)
chr13	118673282	118673450	chr13-184	Mrps30 (-286114), Fgf10 (-41333)
chr14	7752713	7752881	chr14-49	Gm10338 (-157205), Flnb (-65160)
chr14	7773920	7774088	chr14-38	Gm10338 (-178412), Flnb (-43953)
chr14	11473604	11473772	chr14-80	ENSMUSG00000097148 (-116962), Ptprg (-79844)
chr14	11519217	11519385	chr14-31	ENSMUSG00000097148 (-162575), Ptprg (-34231)
chr14	12103357	12103525	chr14-32	3830406C13Rik (-180768), Ptprg (+549909)
chr14	12109376	12109544	chr14-81	3830406C13Rik (-174749), Ptprg (+555928)
chr14	13770873	13771041	chr14-10	Sntn (+100081), Gm281 (+143521)
chr14	16331808	16331976	chr14-56	Oxsm (-82084), Top2b (-33287)
chr14	17405683	17405851	chr14-82	Rarb (-830295), Thrb (-575877)
chr14	19751438	19751606	chr14-83	Nid2 (+265)
chr14	19762150	19762318	chr14-26	Nid2 (+10977), 2700060E02Rik (+61589)
chr14	20468814	20468982	chr14-85	Ttc18 (-16673), Anxa7 (+11235)
chr14	20631313	20631481	chr14-63	Usp54 (-13043), Myoz1 (+25143)
chr14	20682642	20682810	chr14-64	Fut11 (-12242), Sec24c (+8405)
chr14	21149841	21150009	chr14-87	Kat6b (-350967), Adk (+97351)
chr14	21312682	21312850	chr14-42	Kat6b (-188126), Adk (+260192)
chr14	23792901	23793069	chr14-90	Kcnma1 (+10319)
chr14	24253978	24254146	chr14-16	E330034G19Rik (-39302), Dlg5 (-8142)
chr14	25318026	25318194	chr14-92	Zmiz1 (-141114), Rps24 (+827429)
chr14	25754894	25755062	chr14-17	Zcchc24 (+13878), Ppif (+60808)
chr14	25755283	25755451	chr14-29	Zcchc24 (+13489), Ppif (+61197)
chr14	27373636	27373804	chr14-93	D14Abb1e (-55127), Arhgef3 (+135681)
chr14	27670070	27670238	chr14-47	Wnt5a (-834596), Erc2 (+47712)
chr14	27674105	27674273	chr14-51	Wnt5a (-830561), Erc2 (+51747)
chr14	28958710	28958878	chr14-19	Lrtm1 (-59414), Wnt5a (+454044)
chr14	31571537	31571705	chr14-6	Colq (+5762), Eaf1 (+76542)
chr14	32165625	32165793	chr14-65	Ncoa4 (+5844), Timm23 (+36189)
chr14	32634455	32634623	chr14-52	Prrxl1 (+34612), 3425401B19Rik (+50733)
chr14	33217613	33217781	chr14-66	Arhgap22 (+874)
chr14	33535434	33535602	chr14-18	Mapk8 (-88360), Ptpn20 (-53752)
chr14	33647442	33647610	chr14-95	Gdf10 (-276061), Ptpn20 (+58256)
chr14	34303333	34303501	chr14-57	Fam35a (+7086), Syt15 (+83370)
chr14	39354888	39355056	chr14-97	Nrg3 (+118116)
chr14	43319037	43319205	chr14-67	Gm9732 (+20249), 1700001F09Rik (+28690)
chr14	45507160	45507328	chr14-14	Gnpnat1 (-118442), Fermt2 (+22874)
chr14	45559108	45559276	chr14-69	Fermt2 (-29074), Ddhd1 (+98906)
chr14	45658003	45658171	chr14-39	Ddhd1 (+11)
chr14	46120938	46121106	chr14-70	Ddhd1 (-462924), Gm15217 (-258445)
chr14	46947754	46947922	chr14-53	Samd4 (+64984), Gch1 (+241575)
chr14	47356722	47356890	chr14-15	Lgals3 (-17007), Mapk1ip1l (+48241)
chr14	47420028	47420196	chr14-71	Dlgap5 (-1705)
chr14	48475667	48475835	chr14-9	Tmem260 (+29369), Otx2 (+189495)
chr14	48655060	48655228	chr14-40	Otx2 (+10102), Tmem260 (+208762)
chr14	49155489	49155657	chr14-72	Exoc5 (-88920), Naa30 (-17025)
chr14	50930471	50930639	chr14-58	Tmem55b (+294)
chr14	52066268	52066436	chr14-33	Olfr221 (-30209), Hnrnpc (+37676)
chr14	53577194	53577362	chr14-27	Trav9n-1 (+475585), Dad1 (+676636)
chr14	54383659	54383827	chr14-41	Oxa1l (+22902), Slc7a7 (+25729)
chr14	55092365	55092533	chr14-43	Thtpa (-2386), Zfhx2 (-125)
chr14	56098580	56098748	chr14-101	Mcpt8 (-13448), Ctsg (+3910)
chr14	56490593	56490761	chr14-102	Cenpj (+81169), Rnf17 (+87980)
chr14	56888012	56888180	chr14-44	Zmym2 (+301)
chr14	57525456	57525624	chr14-48	Il17d (+711)
chr14	57908549	57908717	chr14-103	Zdhhc20 (-18371), Micu2 (+90629)
chr14	58074927	58075095	chr14-59	Rpl13-ps3 (-818495), Fgf9 (+2325)
chr14	58190042	58190210	chr14-74	Rpl13-ps3 (-703380), Fgf9 (+117440)
chr14	61058411	61058579	chr14-104	Sacs (-79962), Tnfrsf19 (-11640)
chr14	61603151	61603319	chr14-23	Kcnrg (-4247)
chr14	61648743	61648911	chr14-60	Kcnrg (+41345), Dleu7 (+644152)
chr14	62292901	62293069	chr14-30	Dleu7 (-6)
chr14	62425324	62425492	chr14-22	Gucy1b2 (+30881), Rnaseh2b (+93340)
chr14	64412842	64413010	chr14-61	Msra (+42977), Prss52 (+308640)
chr14	65968612	65968780	chr14-36	Clu (+213)
chr14	68934922	68935090	chr14-24	Adam28 (-279164), Stc1 (-94283)
chr14	70461219	70461387	chr14-54	Phyhip (+3827), Bmp1 (+58957)
chr14	70753647	70753815	chr14-105	Npm2 (-100647), Xpo7 (+12897)
chr14	71081442	71081610	chr14-106	Gfra2 (+191396)
chr14	75505266	75505434	chr14-55	Siah3 (+49368), Spert (+87766)
chr14	75835118	75835286	chr14-107	Slc25a30 (-48165), Tpt1 (-9891)
chr14	78288918	78289086	chr14-11	Fam216b (-199995), Tnfsf11 (+19041)
chr14	79639433	79639601	chr14-20	Lect1 (+22653), Sugt1 (+51826)
chr14	89397201	89397369	chr14-109	Pcdh20 (-925889), Gm10110 (+501181)
chr14	89557446	89557614	chr14-21	Gm10110 (+340936)
chr14	92310069	92310237	chr14-110	NONE
chr14	93342805	93342973	chr14-76	Pcdh9 (+545843)
chr14	100294894	100295062	chr14-78	Klf12 (-145214), 1700110M21Rik (+905091)
chr14	114959842	114960010	chr14-13	Gpc5 (-132700)
chr14	117337374	117337542	chr14-113	Gpc6 (+411927), Dct (+714788)
chr14	118436861	118437029	chr14-28	Gm9376 (+169787), Abcc4 (+269274)
chr14	118695893	118696061	chr14-34	Abcc4 (+10242), Gm9376 (+428819)
chr14	121542963	121543131	chr14-7	Slc15a1 (-37793), Dock9 (+155370)
chr14	121714396	121714564	chr14-115	Ubac2 (-164126), Dock9 (-16063)
chr14	122255546	122255714	chr14-8	Clybl (+73936), Zic5 (+210047)
chr14	122267682	122267850	chr14-12	Clybl (+86072), Zic5 (+197911)
chr14	122340864	122341032	chr14-79	Zic5 (+124729), Clybl (+159254)
chr14	122342211	122342379	chr14-46	Zic5 (+123382), Clybl (+160601)
chr14	122416330	122416498	chr14-25	Zic5 (+49263), Clybl (+234720)
chr14	123626428	123626596	chr14-35	Nalcn (+632)
chr15	6909815	6909983	chr15-47	Lifr (-244454), Osmr (-34930)
chr15	8420905	8421073	chr15-76	Nipbl (+23474), 2410089E03Rik (+251883)
chr15	8451220	8451388	chr15-123	Nipbl (-6841), Gm2310 (+68649)
chr15	8568724	8568892	chr15-8	Gm2310 (-48855), Slc1a3 (+141956)
chr15	10723736	10723904	chr15-102	C1qtnf3 (-228537), Rai14 (-10280)
chr15	11461735	11461903	chr15-103	Tars (-62161), Npr3 (+443855)
chr15	12803236	12803404	chr15-125	Pdzd2 (-210764), 6030458C11Rik (+21337)
chr15	22087047	22087215	chr15-104	Cdh18 (-949332), Cdh12 (+975679)
chr15	25754216	25754384	chr15-42	Fam134b (-88964), Myo10 (+131775)
chr15	25761857	25762025	chr15-77	Fam134b (-81323), Myo10 (+139416)
chr15	25762347	25762515	chr15-48	Fam134b (-80833), Myo10 (+139906)
chr15	27356703	27356871	chr15-78	Ank (-109890), Gm6576 (+331401)
chr15	27998870	27999038	chr15-63	Fam105a (-317412), Trio (+26894)
chr15	28071231	28071399	chr15-64	Dnahc5 (-132437), Trio (-45467)
chr15	31294521	31294689	chr15-23	Dap (+70220), Ankrd33b (+73121)
chr15	34877104	34877272	chr15-33	Kcns2 (+39807), Stk3 (+278618)
chr15	36126836	36127004	chr15-84	Cox6c (-189275), Rgs22 (+13480)
chr15	36333390	36333558	chr15-126	Rpl7a-ps3 (-24518), Ankrd46 (+163317)
chr15	36472083	36472251	chr15-85	Rpl7a-ps3 (-163211), Ankrd46 (+24624)
chr15	36507889	36508057	chr15-10	Ankrd46 (-11182), Snx31 (+47600)
chr15	36716501	36716669	chr15-31	Pabpc1 (-107612), Ywhaz (+77953)
chr15	36796955	36797123	chr15-43	Ywhaz (-2501)
chr15	37082053	37082221	chr15-44	Grhl2 (-150899), Zfp706 (-74735)
chr15	37430991	37431159	chr15-86	4930447A16Rik (+5521), Ncald (+361358)
chr15	38251109	38251277	chr15-20	Odf1 (+31990), Klf10 (+49514)
chr15	38302317	38302485	chr15-65	Klf10 (-1694)
chr15	38384383	38384551	chr15-24	Klf10 (-83760), Azin1 (+134799)
chr15	38519358	38519526	chr15-18	Azin1 (-176)
chr15	39728222	39728390	chr15-87	Dcstamp (-17626), Rims2 (+529943)
chr15	41667035	41667203	chr15-130	Abra (+202601), Oxr1 (+219637)
chr15	41789211	41789379	chr15-105	Abra (+80425), Oxr1 (+341813)
chr15	44716018	44716186	chr15-1	Sybu (+71961), Ebag9 (+96461)
chr15	47574123	47574291	chr15-131	4930548G14Rik (+948751)
chr15	52967927	52968095	chr15-38	Med30 (+255566), Ext1 (+378148)
chr15	53858533	53858701	chr15-132	Ext1 (-512458), Gm7489 (-26289)
chr15	54800928	54801096	chr15-133	Nov (+55310), Enpp2 (+119134)
chr15	58063442	58063610	chr15-49	9130401M01Rik (-29232), Zhx1 (+12963)
chr15	58136789	58136957	chr15-134	Wdyhv1 (-4563), Atad2 (-1791)
chr15	59291615	59291783	chr15-106	Mtss1 (-209673), Sqle (-23382)
chr15	59647966	59648134	chr15-136	Trib1 (-300)
chr15	59828584	59828752	chr15-107	Trib1 (+180318), 4933412E24Rik (+187950)
chr15	62079729	62079897	chr15-88	Myc (+94422)
chr15	62092560	62092728	chr15-137	Myc (+107253)
chr15	63998122	63998290	chr15-89	Gsdmc4 (-95270), Fam49b (+62242)
chr15	64193694	64193862	chr15-108	Fam49b (-133330), Asap1 (+189141)
chr15	64747080	64747248	chr15-139	Asap1 (-364245), Adcy8 (+175132)
chr15	65585656	65585824	chr15-109	Adcy8 (-663444), Efr3a (-201300)
chr15	66282225	66282393	chr15-90	Hhla1 (-305505), Kcnq3 (+3915)
chr15	67018425	67018593	chr15-59	Ndrg1 (-48869), St3gal1 (+95483)
chr15	68907663	68907831	chr15-66	Zfat (-648909), Khdrbs3 (-20673)
chr15	73466712	73466880	chr15-67	Dennd3 (-45764), Ptk2 (-43605)
chr15	74387568	74387736	chr15-27	Mroh5 (-547981), Bai1 (-128544)
chr15	74667856	74668024	chr15-11	Mroh4 (-31679), Arc (+4628)
chr15	75669895	75670063	chr15-140	Top1mt (+8821), Zfp41 (+53294)
chr15	75969242	75969410	chr15-68	Zfp707 (+147)
chr15	76012840	76013008	chr15-7	Fam83h (-3426)
chr15	76119191	76119359	chr15-50	Nrbp2 (-29262), BC024139 (+7267)
chr15	76956773	76956941	chr15-51	1110038F14Rik (+8318), Mb (+65930)
chr15	76976760	76976928	chr15-14	1110038F14Rik (+28305), Mb (+45943)
chr15	77022565	77022733	chr15-144	Mb (+138)
chr15	77116381	77116549	chr15-145	Apol6 (+71390), Rbfox2 (+190588)
chr15	77355370	77355538	chr15-60	Rbfox2 (-48401), Apol7a (+43656)
chr15	77793175	77793343	chr15-91	Apol8 (-38030), Myh9 (+48916)
chr15	78231106	78231274	chr15-111	Pvalb (-26953), Ncf4 (-13611)
chr15	78436946	78437114	chr15-17	Kctd17 (+8402), Tmprss6 (+31604)
chr15	78486653	78486821	chr15-4	Tmprss6 (-18103), Il2rb (+8329)
chr15	78773505	78773673	chr15-56	Mfng (-114)
chr15	78928084	78928252	chr15-32	Nol12 (-6765), Lgals1 (+1443)
chr15	79126387	79126555	chr15-92	1700088E04Rik (+14780), Micall1 (+17499)
chr15	79375188	79375356	chr15-147	Maff (+27731), Tmem184b (+28031)
chr15	79481445	79481613	chr15-69	Csnk1e (-39530), Kcnj4 (+23712)
chr15	79758904	79759072	chr15-61	Sun2 (-16452), Dnalc4 (+15479)
chr15	79832190	79832358	chr15-112	Nptxr (-27508), Npcd (+1963)
chr15	79972241	79972409	chr15-149	Cbx7 (-39673), Pdgfb (+42483)
chr15	80091187	80091355	chr15-70	Syngr1 (-73)
chr15	80977726	80977894	chr15-45	Sgsm3 (+45)
chr15	81479437	81479605	chr15-79	Rbx1 (+13205), Gm5218 (+20027)
chr15	82956597	82956765	chr15-95	Tcf20 (-44547), Nfam1 (+66457)
chr15	83248126	83248294	chr15-114	Cyb5r3 (-75618), A4galt (+3521)
chr15	83265402	83265570	chr15-152	A4galt (-13755), Arfgap3 (+84761)
chr15	83329104	83329272	chr15-153	A4galt (-77457), Arfgap3 (+21059)
chr15	83535392	83535560	chr15-80	Bik (+8614), Mcat (+20235)
chr15	83673125	83673293	chr15-57	Ttll12 (-78052), Scube1 (+51812)
chr15	83749561	83749729	chr15-115	Mpped1 (-35184), Scube1 (-24624)
chr15	83991534	83991702	chr15-81	Efcab6 (+73731), Mpped1 (+206789)
chr15	84212923	84213091	chr15-155	Parvb (-19036), Samm50 (+20774)
chr15	84411185	84411353	chr15-96	1810041L15Rik (+35828), Parvg (+85150)
chr15	84450613	84450781	chr15-97	1810041L15Rik (-3600)
chr15	84544123	84544291	chr15-156	1810041L15Rik (-97110), Ldoc1l (+13616)
chr15	84657490	84657658	chr15-13	Ldoc1l (-99751), Prr5 (-23428)
chr15	84714934	84715102	chr15-158	Arhgap8 (-5034), Prr5 (+34016)
chr15	84988100	84988268	chr15-71	5031439G07Rik (-213)
chr15	85017077	85017245	chr15-98	Upk3a (+20)
chr15	85571658	85571826	chr15-99	Wnt7b (+6328), Gm4825 (+60930)
chr15	86963079	86963247	chr15-159	Fam19a5 (-662067), Tbc1d22a (+748704)
chr15	88189459	88189627	chr15-22	Zdhhc25 (-410759), Fam19a5 (+564313)
chr15	91078196	91078364	chr15-34	Kif21a (-28332), Abcd2 (+113527)
chr15	94724726	94724894	chr15-82	Tmem117 (+95625), Nell2 (+803896)
chr15	95433009	95433177	chr15-116	Nell2 (+95613), Tmem117 (+803908)
chr15	95667485	95667653	chr15-62	Ano6 (-123274), Dbx2 (-11609)
chr15	96135882	96136050	chr15-73	A130051J06Rik (-344324), Arid2 (-151607)
chr15	96308179	96308347	chr15-160	Arid2 (+20690), Scaf11 (+152580)
chr15	96333536	96333704	chr15-12	Arid2 (+46047), Scaf11 (+127223)
chr15	96604433	96604601	chr15-25	Scaf11 (-143674), Slc38a1 (+37445)
chr15	96702599	96702767	chr15-35	Slc38a2 (-2985)
chr15	97342504	97342672	chr15-19	Amigo2 (-95301), Rpap3 (+363234)
chr15	97472180	97472348	chr15-58	Amigo2 (-224977), Rpap3 (+233558)
chr15	98248365	98248533	chr15-162	Olfr286 (-20806), H1fnt (+8858)
chr15	98714000	98714168	chr15-163	Ccdc65 (+5877), Fkbp11 (+14114)
chr15	98743828	98743996	chr15-53	Fkbp11 (-15714), Arf3 (+19299)
chr15	98851640	98851808	chr15-117	Prkag1 (-20216), Mll2 (+19459)
chr15	98886770	98886938	chr15-36	Rhebl1 (-5450), Dhh (+11686)
chr15	98991211	98991379	chr15-74	Tuba1a (-37744), Gm8973 (-14761)
chr15	99223541	99223709	chr15-100	Kcnh3 (-1351)
chr15	99236206	99236374	chr15-3	Kcnh3 (+11314), Mcrs1 (+15671)
chr15	99792490	99792658	chr15-118	Cers5 (-19973), Lima1 (+82854)
chr15	99890895	99891063	chr15-40	Lima1 (-15551), Fam186a (+40817)
chr15	99904496	99904664	chr15-41	Lima1 (-29152), Fam186a (+27216)
chr15	100074891	100075059	chr15-21	Atf1 (-152844), Dip2b (+36311)
chr15	100630261	100630429	chr15-164	Smagp (+6510), Dazap2 (+14717)
chr15	100770479	100770647	chr15-119	Scn8a (-100120), Slc4a8 (+8816)
chr15	100909979	100910147	chr15-101	Scn8a (+39380), Fignl2 (+144336)
chr15	100965066	100965234	chr15-26	Fignl2 (+89249), Scn8a (+94467)
chr15	101117001	101117169	chr15-15	Acvrl1 (-11437), Ankrd33 (+1330)
chr15	101228208	101228376	chr15-120	Nr4a1 (-38554), Grasp (+4085)
chr15	101329221	101329389	chr15-75	6030408B16Rik (+36093), Krt80 (+40820)
chr15	101397013	101397181	chr15-29	Krt80 (-26972), Krt7 (-15305)
chr15	101494357	101494525	chr15-5	5430421N21Rik (-2929)
chr15	102005486	102005654	chr15-54	Krt8 (-1228)
chr15	102083491	102083659	chr15-165	Tenc1 (-19413), Eif4b (+9802)
chr15	102203431	102203599	chr15-55	Zfp740 (-4747)
chr15	102212044	102212212	chr15-46	Zfp740 (+3866), Itgb7 (+19807)
chr15	102294327	102294495	chr15-167	Espl1 (-1882)
chr15	102399624	102399792	chr15-30	Sp7 (-33383), Sp1 (-6672)
chr15	102965861	102966029	chr15-168	Hoxc10 (-851)
chr15	103155819	103155987	chr15-83	Smug1 (+2099), Hoxc4 (+121508)
chr15	103215289	103215457	chr15-16	Smug1 (-57371), Cbx5 (+24443)
chr15	103528871	103529039	chr15-169	Ppp1r1a (+9037), Pde1b (+25657)
chr16	3256847	3257015	chr16-56	Olfr161 (-335467)
chr16	3884435	3884603	chr16-75	Gm20695 (-129)
chr16	4549340	4549508	chr16-4	Srl (-26349), Tfap4 (+10296)
chr16	4602332	4602500	chr16-76	Glis2 (+7703), Pam16 (+22572)
chr16	8481769	8481937	chr16-2	Abat (-31576), Mettl22 (+11065)
chr16	8672100	8672268	chr16-57	Carhsp1 (-31)
chr16	9030135	9030303	chr16-9	1810013L24Rik (+200119), Grin2a (+964702)
chr16	9132842	9133010	chr16-30	1810013L24Rik (+302826), Grin2a (+861995)
chr16	9280964	9281132	chr16-19	1810013L24Rik (+450948), Grin2a (+713873)
chr16	9291498	9291666	chr16-37	1810013L24Rik (+461482), Grin2a (+703339)
chr16	11066580	11066748	chr16-78	Snn (+366)
chr16	11198538	11198706	chr16-52	Zc3h7a (-22229), Rsl1d1 (+4709)
chr16	11360666	11360834	chr16-41	Snx29 (-44898), Tnfrsf17 (+46938)
chr16	11380199	11380367	chr16-105	Snx29 (-25365), Tnfrsf17 (+66471)
chr16	13428964	13429132	chr16-5	Mkl2 (+172567), Parn (+239122)
chr16	13671749	13671917	chr16-66	Parn (-3663), 3110001I22Rik (-96), Bfar (-25)
chr16	13818530	13818698	chr16-38	Ntan1 (-637)
chr16	13891642	13891810	chr16-79	Pdxdc1 (+11295), Ntan1 (+72475)
chr16	13976623	13976791	chr16-67	2900011O08Rik (-9897), Mpv17l (+36042)
chr16	13981794	13981962	chr16-106	2900011O08Rik (-4726)
chr16	14004258	14004426	chr16-23	Ifitm7 (-17487), Marf1 (+154932)
chr16	14557275	14557443	chr16-48	A630010A05Rik (-22862), Gm1758 (+55259)
chr16	14705315	14705483	chr16-107	Snai2 (-453)
chr16	15864193	15864361	chr16-108	Mzt2 (-930)
chr16	15927576	15927744	chr16-109	Mzt2 (-64313), 2310008H04Rik (+219191)
chr16	16825068	16825236	chr16-25	Olfr19 (-151135), Spag6 (+4161)
chr16	16911968	16912136	chr16-26	Mapk1 (-71330), Ppm1f (+15583)
chr16	17208857	17209025	chr16-12	Rimbp3 (+806)
chr16	17220377	17220545	chr16-68	Hic2 (-13111), Rimbp3 (+12326)
chr16	17276257	17276425	chr16-14	Tmem191c (+41)
chr16	17497052	17497220	chr16-69	Lztr1 (-11832), Aifm3 (+7473)
chr16	17500247	17500415	chr16-80	Lztr1 (-8637), Aifm3 (+10668)
chr16	17671491	17671659	chr16-70	Ccdc74a (+25100), Med15 (+51355)
chr16	17792827	17792995	chr16-53	Scarf2 (-4371)
chr16	17977633	17977801	chr16-110	Vpreb2 (-2848)
chr16	18218784	18218952	chr16-81	Gm7873 (+698)
chr16	18347873	18348041	chr16-42	Tango2 (-4030), Arvcf (-317)
chr16	18724796	18724964	chr16-39	Sept5 (-94942), Cldn5 (-51967)
chr16	19237894	19238062	chr16-34	Iglc2 (-37627), Olfr164 (+48859)
chr16	20522466	20522634	chr16-8	Ap2m1 (-12930), Dvl3 (+5568)
chr16	20611439	20611607	chr16-43	Alg3 (-755), Ece2 (-87)
chr16	20805170	20805338	chr16-31	Ephb3 (-399501), Thpo (-70743)
chr16	20990653	20990821	chr16-83	Thpo (-256226), Ephb3 (-214018)
chr16	21418161	21418329	chr16-113	Vps8 (-4873)
chr16	21678927	21679095	chr16-18	2510009E07Rik (+15654), Vps8 (+255893)
chr16	21701961	21702129	chr16-115	2510009E07Rik (-7380), Ehhadh (+85799)
chr16	22216345	22216513	chr16-27	Igf2bp2 (-53130), Tra2b (+49576)
chr16	22341391	22341559	chr16-116	Tra2b (-75470), Etv5 (+98244)
chr16	22873526	22873694	chr16-44	Ahsg (-18432), Dnajb11 (+15765)
chr16	22955769	22955937	chr16-84	Hrg (+4781), Kng2 (+73248)
chr16	23662543	23662711	chr16-118	Rtp4 (+52708), Sst (+228217)
chr16	24943747	24943915	chr16-85	Tprg (-342986), Lpp (+550481)
chr16	25407212	25407380	chr16-40	Trp63 (-276469), Tprg (+120479)
chr16	26649630	26649798	chr16-6	Il1rap (+68010), Gmnc (+340260)
chr16	27088168	27088336	chr16-120	Ostn (-219237), Gmnc (-98278)
chr16	28840651	28840819	chr16-121	Fgf12 (-395508), Mb21d2 (+88963)
chr16	29762045	29762213	chr16-59	Hes1 (-303211), Opa1 (+182749)
chr16	30050965	30051133	chr16-16	Hes1 (-14291), Opa1 (+471669)
chr16	30064124	30064292	chr16-24	Hes1 (-1132)
chr16	30156041	30156209	chr16-15	Hes1 (+90785), Cpn2 (+111407)
chr16	30216002	30216170	chr16-122	Cpn2 (+51446), Hes1 (+150746)
chr16	30527959	30528127	chr16-45	Atp13a3 (-139513), Tmem44 (+22535)
chr16	30646226	30646394	chr16-71	Fam43a (+46587), Xxylt1 (+435122)
chr16	30939953	30940121	chr16-86	Xxylt1 (+141395), Fam43a (+340314)
chr16	31509076	31509244	chr16-35	Dlg1 (-154879), Bdh1 (+80412)
chr16	32117842	32118010	chr16-17	Cep19 (+18126), Lrrc33 (+47550)
chr16	32303268	32303436	chr16-88	Ubxn7 (-28900), Rnf168 (+25891)
chr16	32608704	32608872	chr16-54	Tfrc (-132)
chr16	32820683	32820851	chr16-89	Gm933 (-10290), 1700021K19Rik (+47572)
chr16	33517362	33517530	chr16-123	Slc12a8 (-883)
chr16	33880661	33880829	chr16-124	Itgb5 (+51068), Umps (+86293)
chr16	34404397	34404565	chr16-90	Umps (-437443), Kalrn (+109567)
chr16	35360676	35360844	chr16-49	Sec22a (+3158), Adcy5 (+205883)
chr16	35564585	35564753	chr16-13	Sema5b (+23098), Dirc2 (+204687)
chr16	35729226	35729394	chr16-32	Dirc2 (+40046), Sema5b (+187739)
chr16	35738048	35738216	chr16-125	Dirc2 (+31224), Sema5b (+196561)
chr16	36702939	36703107	chr16-91	Ildr1 (+8985), Slc15a2 (+81939)
chr16	36987463	36987631	chr16-126	Fbxo40 (+2920), Hcls1 (+52564)
chr16	38139185	38139353	chr16-127	Gsk3b (+50268), Nr1i2 (+155555)
chr16	42269378	42269546	chr16-128	Gap43 (+71189), Lsamp (+736604)
chr16	42600141	42600309	chr16-129	Zbtb20 (-307427), Gap43 (-259574)
chr16	44532133	44532301	chr16-130	Boc (+26653), Wdr52 (+137418)
chr16	45304729	45304897	chr16-92	Btla (+80476), Cd200 (+104240)
chr16	45336581	45336749	chr16-131	Cd200 (+72388), Btla (+112328)
chr16	46088474	46088642	chr16-132	Plcxd2 (-78340), Cd96 (+31693)
chr16	50540244	50540412	chr16-50	Bbx (-107938), Ccdc54 (+50826)
chr16	55322015	55322183	chr16-93	Zpld1 (-24113), Nfkbiz (+516800)
chr16	57398606	57398774	chr16-94	Filip1l (+45597), Cmss1 (+208135)
chr16	59998325	59998493	chr16-133	Arl6 (-359242), Epha6 (+606839)
chr16	65662721	65662889	chr16-95	Vgll3 (-152828), Chmp2b (-100108)
chr16	71239020	71239188	chr16-72	4930423O20Rik (-856719)
chr16	77050469	77050637	chr16-134	Usp25 (+36484), Gm11146 (+551541)
chr16	80073563	80073731	chr16-135	Tmprss15 (-982555)
chr16	82596490	82596658	chr16-22	NONE
chr16	83579159	83579327	chr16-60	NONE
chr16	87700092	87700260	chr16-61	2810407A14Rik (-83899), Bach1 (+1231)
chr16	88701076	88701244	chr16-51	Krtap27-1 (-29506), 2310061N02Rik (+6802)
chr16	88720167	88720335	chr16-96	2310061N02Rik (-12289), Krtap13-1 (-8611)
chr16	89954566	89954734	chr16-97	Krtap11-1 (-383467), Tiam1 (+20049)
chr16	89973896	89974064	chr16-136	Tiam1 (+719)
chr16	90082197	90082365	chr16-62	Sod1 (-138461), Tiam1 (-107582)
chr16	90257245	90257413	chr16-137	Scaf4 (+27096), Sod1 (+36587)
chr16	90934436	90934604	chr16-138	1110004E09Rik (+307)
chr16	91067228	91067396	chr16-21	Paxbp1 (-22769), 4932438H23Rik (+1833)
chr16	91480735	91480903	chr16-63	Ifnar1 (-4419)
chr16	91693280	91693448	chr16-1	Donson (-4599)
chr16	91818508	91818676	chr16-36	Itsn1 (+89239), Atp5o (+113095)
chr16	92961545	92961713	chr16-139	Runx1 (-135563), Setd4 (+642186)
chr16	93309097	93309265	chr16-10	Runx1 (-483115), Setd4 (+294634)
chr16	93586588	93586756	chr16-99	Runx1 (-760606), Setd4 (+17143)
chr16	93684519	93684687	chr16-73	Dopey2 (-27304), Cbr3 (+1388)
chr16	93711861	93712029	chr16-140	Dopey2 (+38)
chr16	96757670	96757838	chr16-46	Pcp4 (+290148), Dscam (+412998)
chr16	97488365	97488533	chr16-29	Gm9242 (-1598)
chr17	3410386	3410554	chr17-32	Cldn20 (-122084), Tiam2 (+83897)
chr17	5053251	5053419	chr17-114	Arid1b (+58261), Tmem242 (+386925)
chr17	5143786	5143954	chr17-71	Arid1b (+148796), Tmem242 (+296390)
chr17	5277206	5277374	chr17-137	Tmem242 (+162970), Arid1b (+282216)
chr17	6476745	6476913	chr17-138	Dynlt1b (+46717), Gm2792 (+106289)
chr17	6827952	6828120	chr17-139	Ezr (-45252), Rsph3b (+120320)
chr17	7187129	7187297	chr17-10	Tcp10a (-137454), Rps6ka2 (+17098)
chr17	7906699	7906867	chr17-140	Fndc1 (-101809), Tagap (-19217)
chr17	8205269	8205437	chr17-9	Ccr6 (-37173), Fgfr1op (+39852)
chr17	8347004	8347172	chr17-29	T (-87335), Prr18 (+6682)
chr17	8368035	8368203	chr17-174	T (-66304), Prr18 (+27713)
chr17	9167219	9167387	chr17-115	1700010I14Rik (+178946), Pabpc6 (+502401)
chr17	10483616	10483784	chr17-175	Qk (-163471), Pacrg (+356611)
chr17	10567494	10567662	chr17-83	Qk (-247349), Pacrg (+272733)
chr17	10840216	10840384	chr17-93	Park2 (-92), Pacrg (+11)
chr17	10929974	10930142	chr17-72	Park2 (-137067), Park2 (+89666)
chr17	11107192	11107360	chr17-94	Park2 (-731326), Park2 (+40151)
chr17	12195301	12195469	chr17-84	Map3k4 (-37096), Agpat4 (+76101)
chr17	12992563	12992731	chr17-141	Wtap (-150)
chr17	13668701	13668869	chr17-105	Mllt4 (-91763), Smok4a (+147329)
chr17	13711952	13712120	chr17-177	Mllt4 (-48512), Smok4a (+190580)
chr17	13743930	13744098	chr17-116	Mllt4 (-16534), Smok4a (+222558)
chr17	15093662	15093830	chr17-14	2210404J11Rik (+52105), Dll1 (+282230)
chr17	15208080	15208248	chr17-95	2210404J11Rik (+166523), Dll1 (+167812)
chr17	15248108	15248276	chr17-86	Dll1 (+127784), 2210404J11Rik (+206551)
chr17	15295515	15295683	chr17-143	Dll1 (+80377), 2210404J11Rik (+253958)
chr17	15343183	15343351	chr17-144	Dll1 (+32709), 2210404J11Rik (+301626)
chr17	15371963	15372131	chr17-49	Dll1 (+3929), 2210404J11Rik (+330406)
chr17	15376972	15377140	chr17-16	Dll1 (-1080)
chr17	16218729	16218897	chr17-33	BC002059 (-754097), Rgmb (-392227)
chr17	17739966	17740134	chr17-36	Ncrna00085 (-90954), Vmn2r90 (+36109)
chr17	17913785	17913953	chr17-180	Fpr-rs4 (-107864), Fpr2 (+25981)
chr17	20682952	20683120	chr17-181	Vmn1r226 (-4472)
chr17	23601901	23602069	chr17-183	Zfp13 (-2498), Zscan10 (+1129)
chr17	23660743	23660911	chr17-30	Ccdc64b (+304)
chr17	23664643	23664811	chr17-118	Hcfc1r1 (-8881), Ccdc64b (+4204)
chr17	23722857	23723025	chr17-62	Pkmyt1 (-3395)
chr17	24311395	24311563	chr17-185	Ccnf (-60070), Abca17 (+39550)
chr17	24632548	24632716	chr17-63	Nthl1 (-50), Tsc2 (-3)
chr17	24697934	24698102	chr17-57	Gfer (-1862), Noxo1 (+1784)
chr17	24769232	24769400	chr17-64	Meiob (-35066), Hs3st6 (+16313)
chr17	25109436	25109604	chr17-18	Tmem204 (-28339), Telo2 (+6447)
chr17	25760010	25760178	chr17-50	Narfl (-13682), Msln (-5767)
chr17	27041300	27041468	chr17-65	Itpr3 (-15920), Bak1 (-12375)
chr17	27100278	27100446	chr17-19	Mnf1 (+33554), Itpr3 (+43058)
chr17	27186176	27186344	chr17-119	Ip6k3 (-18496), Lemd2 (+18178)
chr17	27329849	27330017	chr17-25	Lemd2 (-125495), Grm4 (+173371)
chr17	27796854	27797022	chr17-96	Spdef (-67988), D17Wsu92e (+23620)
chr17	28037055	28037223	chr17-187	Tcp11 (+43445), Anks1 (+127799)
chr17	28224121	28224289	chr17-37	Ppard (-8549), Def6 (+16427)
chr17	28388663	28388831	chr17-1	Tulp1 (-23599), Fkbp5 (+128777)
chr17	28573804	28573972	chr17-46	Lhfpl5 (-1830)
chr17	28594009	28594177	chr17-147	Lhfpl5 (+18375), Srpk1 (+28428)
chr17	28769108	28769276	chr17-43	Mapk13 (-115)
chr17	28777892	28778060	chr17-148	Brpf3 (-23114), Mapk13 (+8669)
chr17	28834868	28835036	chr17-106	Pnpla1 (-23459), Brpf3 (+33862)
chr17	28882452	28882620	chr17-149	Pnpla1 (+24125), 4930539E08Rik (+32788)
chr17	29056803	29056971	chr17-21	Cdkn1a (-36885), Srsf3 (+24214)
chr17	29365389	29365557	chr17-188	Pim1 (-125339), Fgd2 (+4531)
chr17	29415953	29416121	chr17-54	Pim1 (-74775), Fgd2 (+55095)
chr17	29438516	29438684	chr17-150	Pim1 (-52212), Fgd2 (+77658)
chr17	29617214	29617382	chr17-107	Ftsjd2 (-43297), Rnf8 (+2508)
chr17	29627097	29627265	chr17-66	Ftsjd2 (-33414), Rnf8 (+12391)
chr17	29855018	29855186	chr17-151	Ccdc167 (-138093), Mdga1 (+32780)
chr17	30115636	30115804	chr17-189	Gm9874 (-369791), Zfand3 (+110633)
chr17	30324281	30324449	chr17-108	Gm9874 (-161146), Zfand3 (+319278)
chr17	30378393	30378561	chr17-31	Gm9874 (-107034), Zfand3 (+373390)
chr17	30484835	30485003	chr17-190	Gm9874 (-592)
chr17	30601333	30601501	chr17-121	Btbd9 (-25130), Glo1 (+11242)
chr17	30615953	30616121	chr17-194	Glo1 (-3378)
chr17	31033279	31033447	chr17-47	Abcg1 (-24335), Umodl1 (+78680)
chr17	31034206	31034374	chr17-199	Abcg1 (-23408), Umodl1 (+79607)
chr17	31057312	31057480	chr17-200	Abcg1 (-302)
chr17	31057911	31058079	chr17-156	Abcg1 (+297)
chr17	31073337	31073505	chr17-58	Abcg1 (+15723), Tff3 (+56225)
chr17	31125980	31126148	chr17-122	Tff3 (+3582), Abcg1 (+68366)
chr17	31264345	31264513	chr17-157	Rsph1 (+12927), Ubash3a (+56556)
chr17	31328580	31328748	chr17-15	Pde9a (-57570), Slc37a1 (+32445)
chr17	31422114	31422282	chr17-17	Pde9a (+35964), Wdr4 (+90553)
chr17	32073439	32073607	chr17-123	Rrp1b (+37423), Notch3 (+93357)
chr17	32162679	32162847	chr17-69	Notch3 (+4117), Rrp1b (+126663)
chr17	32211246	32211414	chr17-51	Ephx3 (-21867), Brd4 (+72767)
chr17	32211601	32211769	chr17-42	Ephx3 (-22222), Brd4 (+72412)
chr17	32947551	32947719	chr17-124	Cyp4f13 (-233)
chr17	33599986	33600154	chr17-204	Zfp414 (-29020), Myo1f (+44351)
chr17	33817635	33817803	chr17-44	Rps28 (+6773), Kank3 (+7199)
chr17	33908825	33908993	chr17-97	Daxx (-692)
chr17	33951587	33951755	chr17-206	Vps52 (-4141), B3galt4 (-183)
chr17	34067681	34067849	chr17-28	H2-Oa (-24575), Col11a2 (+28328)
chr17	34388176	34388344	chr17-13	BC051142 (-10561), Btnl1 (+11128)
chr17	35141222	35141390	chr17-158	Bag6 (+6128), Prrc2a (+23591)
chr17	35525133	35525301	chr17-211	Psors1c2 (-7984), Cchcr1 (+8041)
chr17	35651091	35651259	chr17-89	Sfta2 (+1467), Vars2 (+16417)
chr17	35697764	35697932	chr17-45	Gtf2h4 (-24109), Ddr1 (+6751)
chr17	35704015	35704183	chr17-67	Ddr1 (+500)
chr17	35824511	35824679	chr17-213	Flot1 (+1365), Tubb5 (+13711)
chr17	35865701	35865869	chr17-78	Ppp1r18 (-875)
chr17	35917861	35918029	chr17-98	Mrps18b (-1556), Ppp1r10 (+1379)
chr17	36231473	36231641	chr17-22	H2-T3 (-41270), Rpp21 (+26512)
chr17	36355523	36355691	chr17-34	H2-M10.1 (-29452), H2-M10.3 (+12810)
chr17	36788801	36788969	chr17-73	H2-M10.6 (-23286), H2-M10.5 (+15975)
chr17	36826046	36826214	chr17-59	Trim26 (-11013), H2-M10.6 (+13959)
chr17	37028931	37029099	chr17-79	Gabbr1 (-16951), Mog (-5617)
chr17	37531596	37531764	chr17-90	Olfr111 (+1723), Olfr112 (+35414)
chr17	37990666	37990834	chr17-214	Olfr761 (-37728), Olfr129 (+64994)
chr17	41070923	41071091	chr17-80	Cenpq (-135960)
chr17	41556676	41556844	chr17-159	Ptchd4 (-759187), Cenpq (-621713)
chr17	42876666	42876834	chr17-40	Cd2ap (-326)
chr17	45062460	45062628	chr17-161	Runx2 (-247747), Cdc5l (+371163)
chr17	45332678	45332846	chr17-215	Runx2 (-517965), Cdc5l (+100945)
chr17	45573311	45573479	chr17-91	Hsp90ab1 (-124)
chr17	45602096	45602264	chr17-52	Gm7325 (-265)
chr17	45629835	45630003	chr17-217	Gm7325 (-28004), Capn11 (+29406)
chr17	45805622	45805790	chr17-125	1600014C23Rik (-71862), Vegfa (+226663)
chr17	45886686	45886854	chr17-162	1600014C23Rik (-152926), Vegfa (+145599)
chr17	46093247	46093415	chr17-23	Vegfa (-60962), Mrps18a (-17655)
chr17	46132431	46132599	chr17-109	Rsph9 (+11701), Mrps18a (+21529)
chr17	46508430	46508598	chr17-99	Dnph1 (+11725), Cul9 (+37874)
chr17	46589448	46589616	chr17-218	Srf (-33370), Ptk7 (+39972)
chr17	46886338	46886506	chr17-100	Tbcc (-4199), A330017A19Rik (+3983)
chr17	46890879	46891047	chr17-219	A330017A19Rik (-558), Tbcc (+342)
chr17	47139749	47139917	chr17-81	Trerf1 (-1109)
chr17	47462742	47462910	chr17-126	1700001C19Rik (-25451), Taf8 (+39461)
chr17	47511353	47511521	chr17-74	Ccnd3 (+6386), Bysl (+100055)
chr17	47521727	47521895	chr17-127	Ccnd3 (+16760), Bysl (+89681)
chr17	47702700	47702868	chr17-220	Pgc (-24058), Frs3 (+7586)
chr17	48101024	48101192	chr17-163	1700067P10Rik (+11476), 9830107B12Rik (+45199)
chr17	48250281	48250449	chr17-223	Treml4 (-13972), Trem3 (+2588)
chr17	48610935	48611103	chr17-75	Lrfn2 (-321360), Unc5cl (+156118)
chr17	49291063	49291231	chr17-20	Mocs1 (-137263), Lrfn2 (+358768)
chr17	49368318	49368486	chr17-128	Mocs1 (-60008), Lrfn2 (+436023)
chr17	49384712	49384880	chr17-129	Mocs1 (-43614), Lrfn2 (+452417)
chr17	49717734	49717902	chr17-24	Kif6 (+102646), Rftn1 (+472856)
chr17	49889983	49890151	chr17-164	Kif6 (+274895), Rftn1 (+300607)
chr17	50625119	50625287	chr17-165	Plcl2 (+115656), Tbc1d5 (+554146)
chr17	52601307	52601475	chr17-26	Kcnh8 (-1372)
chr17	55672686	55672854	chr17-166	Vmn2r118 (-48098), Pot1b (+39858)
chr17	56357574	56357742	chr17-167	Kdm4b (+31584), Ptprs (+118825)
chr17	56554366	56554534	chr17-101	Znrf4 (-41967), Safb2 (+30135)
chr17	56716871	56717039	chr17-102	Ndufa11 (-807), Vmac (-34)
chr17	56762209	56762377	chr17-68	Nrtn (-4763), Dus3l (-2458)
chr17	56782036	56782204	chr17-130	Prr22 (+11844), Rfx2 (+48888)
chr17	57070848	57071016	chr17-38	Dennd1c (+7578), Crb3 (+8701)
chr17	58041356	58041524	chr17-224	Cntnap5c (+271870), 2610034M16Rik (+949935)
chr17	58089510	58089678	chr17-225	Cntnap5c (+320024), 2610034M16Rik (+901781)
chr17	65872775	65872943	chr17-226	Ralbp1 (+12896), Ppp4r1 (+89504)
chr17	65961813	65961981	chr17-131	Twsg1 (-10710), Ankrd12 (+115149)
chr17	66479840	66480008	chr17-27	Soga2 (-30174), Rab12 (+39746)
chr17	66480346	66480514	chr17-132	Soga2 (-30680), Rab12 (+39240)
chr17	66545960	66546128	chr17-103	Rab12 (-26374), Themis3 (+48577)
chr17	66546526	66546694	chr17-53	Rab12 (-26940), Themis3 (+48011)
chr17	66579225	66579393	chr17-76	Rab12 (-59639), Themis3 (+15312)
chr17	67996194	67996362	chr17-168	Arhgap28 (+7842), Lama1 (+299013)
chr17	70828979	70829147	chr17-110	Tgif1 (+22671), Dlgap1 (+404269)
chr17	70900732	70900900	chr17-111	Tgif1 (-49082), Gm16519 (-28242)
chr17	71406582	71406750	chr17-228	Emilin2 (-95701), Smchd1 (+68677)
chr17	72836173	72836341	chr17-77	Ypel5 (-447)
chr17	73747745	73747913	chr17-112	Ehd3 (-57012), Galnt14 (-37378)
chr17	75463448	75463616	chr17-12	Rasgrp3 (+27627), Fam98a (+88414)
chr17	75534766	75534934	chr17-133	Fam98a (+17096), Rasgrp3 (+98945)
chr17	75551837	75552005	chr17-70	Fam98a (+25)
chr17	79364779	79364947	chr17-134	Rmdn2 (-250037), Cdc42ep3 (-9772)
chr17	79881271	79881439	chr17-55	Cyp1b1 (-166314), Atl2 (+14673)
chr17	79982707	79982875	chr17-60	Atl2 (-86763), Hnrpll (+79543)
chr17	80180553	80180721	chr17-230	Srsf7 (+26668), Galm (+53166)
chr17	80231401	80231569	chr17-135	Morn2 (-58727), Gemin6 (+7044)
chr17	83494257	83494425	chr17-48	Cox7a2l (+19992), Eml4 (+143410)
chr17	84541314	84541482	chr17-233	Dync2li1 (-85098), Plekhh2 (+29503)
chr17	87072274	87072442	chr17-11	Gm5499 (-5905), Cript (+46808)
chr17	87193550	87193718	chr17-104	Mcfd2 (+72270), Socs5 (+85955)
chr17	87272623	87272791	chr17-61	Ttc7 (-10179), Mcfd2 (-6803)
chr17	87282831	87282999	chr17-234	Ttc7 (+29)
chr17	87446091	87446259	chr17-169	Calm2 (+760)
chr17	87575519	87575687	chr17-235	Calm2 (-128668), Epcam (-60376)
chr17	87973789	87973957	chr17-113	Msh6 (-1177)
chr17	87982036	87982204	chr17-170	Msh6 (+7070), Fbxo11 (+83171)
chr17	88440708	88440876	chr17-136	Foxn2 (+81)
chr17	88500068	88500236	chr17-171	Ppp1r21 (-29972), Foxn2 (+59441)
chr17	88545146	88545314	chr17-236	Ston1 (-81325), Ppp1r21 (+15106)
chr17	88707915	88708083	chr17-35	Gtf2a1l (+39339), Lhcgr (+83977)
chr17	89934078	89934246	chr17-41	Gm10184 (-23713)
chr17	90843190	90843358	chr17-82	Gm10184 (-932825), Gm10308 (-245219)
chr17	91203786	91203954	chr17-172	Nrxn1 (-111065), Gm6741 (-32917)
chr18	3847685	3847853	chr18-69	Lyzl1 (-318063), Bambi (+339812)
chr18	4321048	4321216	chr18-44	Map3k8 (+31821), Lyzl1 (+155300)
chr18	4417146	4417314	chr18-52	9430020K01Rik (-217699), Mtpap (+41638)
chr18	4922815	4922983	chr18-88	Svil (+2359), Zfp438 (+411540)
chr18	4980364	4980532	chr18-45	Svil (+59908), Zfp438 (+353991)
chr18	6055686	6055854	chr18-89	Arhgap12 (+80328), Zeb1 (+463910)
chr18	6239246	6239414	chr18-90	Arhgap12 (-103232), Kif5b (+2193)
chr18	6280666	6280834	chr18-70	Rpl27-ps3 (-51840), Kif5b (-39227)
chr18	6308305	6308473	chr18-17	Kif5b (-66866), Rpl27-ps3 (-24201)
chr18	8194380	8194548	chr18-57	Gm5819 (-499613), Wac (+325267)
chr18	10866359	10866527	chr18-21	Gata6 (-186067), Mib1 (+140895)
chr18	11892335	11892503	chr18-53	Cables1 (+53199), Tmem241 (+229061)
chr18	14512268	14512436	chr18-73	Gm5160 (+87484), Ss18 (+170562)
chr18	16419129	16419297	chr18-92	Cdh2 (+390033), Gm10036 (+586419)
chr18	17874622	17874790	chr18-58	NONE
chr18	18058739	18058907	chr18-36	NONE
chr18	21042628	21042796	chr18-94	Mep1b (-29632), Rnf138 (+41371)
chr18	22649465	22649633	chr18-29	Asxl3 (+304460), Nol4 (+389107)
chr18	23988956	23989124	chr18-95	Zfp35 (-592)
chr18	24132946	24133114	chr18-1	Galnt1 (-72737), Ino80c (-11077)
chr18	25423746	25423914	chr18-96	AW554918 (+254810), Celf4 (+330153)
chr18	27103867	27104035	chr18-74	Gm7729 (-494693)
chr18	31568869	31569037	chr18-46	Syt4 (-121538), B930094E09Rik (-40559)
chr18	33889793	33889961	chr18-37	Epb4.1l4a (+117329), Gm10549 (+425714)
chr18	34259001	34259169	chr18-40	Srp19 (-72060), Apc (+38101)
chr18	34535763	34535931	chr18-59	Fam13b (-29024), Wnt8a (-6466)
chr18	34551877	34552045	chr18-10	Wnt8a (+9648), Nme5 (+27154)
chr18	34851654	34851822	chr18-99	Egr1 (-8085), Reep2 (+11149)
chr18	35022535	35022703	chr18-60	Ctnna1 (-96269), Hspa9 (-68262)
chr18	35545485	35545653	chr18-100	Matr3 (-16589), Gm5239 (+8986)
chr18	35815577	35815745	chr18-47	Cxxc5 (-14157), Ube2d2a (+44102)
chr18	35857274	35857442	chr18-75	Psd2 (-107472), Cxxc5 (+27540)
chr18	35929194	35929362	chr18-101	Psd2 (-35552), Cxxc5 (+99460)
chr18	36328645	36328813	chr18-76	Cystm1 (-20045), Pura (+47632)
chr18	36346352	36346520	chr18-61	Cystm1 (-2338)
chr18	37880143	37880311	chr18-30	Diap1 (+55249), Pcdhga11 (+60681)
chr18	38601588	38601756	chr18-78	Spry4 (-404), 9630014M24Rik (+138)
chr18	42589203	42589371	chr18-62	Gpr151 (-9635), Ppp2r2b (+470184)
chr18	42740715	42740883	chr18-32	Gpr151 (-161147), Ppp2r2b (+318672)
chr18	43687736	43687904	chr18-18	Jakmip2 (-47)
chr18	44644017	44644185	chr18-33	Mcc (+168081), Dcp2 (+263601)
chr18	46879040	46879208	chr18-22	Arl14epl (-46858), 4833403I15Rik (+29085)
chr18	47219239	47219407	chr18-55	Sema6a (+149507), Commd10 (+260461)
chr18	54576766	54576934	chr18-12	Zfp608 (+413330), Csnk1g3 (+714737)
chr18	55142580	55142748	chr18-23	Zfp608 (-152484)
chr18	63907471	63907639	chr18-63	St8sia3 (-346804), Wdr7 (+198860)
chr18	63957528	63957696	chr18-108	St8sia3 (-296747), Wdr7 (+248917)
chr18	65416605	65416773	chr18-79	Alpk2 (-22802), Malt1 (-14274)
chr18	65925199	65925367	chr18-24	Rax (+13806), Grp (+52463)
chr18	65938675	65938843	chr18-80	Rax (+330)
chr18	67330323	67330491	chr18-64	Cidea (-13157), Impa2 (+41154)
chr18	67348174	67348342	chr18-38	Tubb6 (-42459), Cidea (+4694)
chr18	67497269	67497437	chr18-65	Slmo1 (+32504), Spire1 (+55368)
chr18	68007601	68007769	chr18-42	Ldlrad4 (+74428), Fam210a (+292648)
chr18	73225016	73225184	chr18-43	Dcc (-874031), Mex3c (-347944)
chr18	73665524	73665692	chr18-48	Smad4 (+38172), Mex3c (+92564)
chr18	74391559	74391727	chr18-81	Myo5b (-50894), Ccdc11 (+108553)
chr18	74442162	74442330	chr18-49	Myo5b (-291)
chr18	74443734	74443902	chr18-111	Acaa2 (-335379), Myo5b (+1281)
chr18	74794098	74794266	chr18-50	Acaa2 (+14985), Lipg (+167081)
chr18	74827059	74827227	chr18-27	Acaa2 (+47946), Lipg (+134120)
chr18	74869224	74869392	chr18-25	Acaa2 (+90111), Lipg (+91955)
chr18	75306515	75306683	chr18-7	Smad7 (-60930), Dym (+287827)
chr18	75607236	75607404	chr18-51	Ctif (+90376), Smad7 (+239791)
chr18	76153824	76153992	chr18-66	Smad2 (-87672), Zbtb7c (+333730)
chr18	76171670	76171838	chr18-16	Smad2 (-69826), Zbtb7c (+351576)
chr18	76578973	76579141	chr18-82	Skor2 (-277348), Smad2 (+337477)
chr18	76657821	76657989	chr18-6	Skor2 (-198500), Smad2 (+416325)
chr18	76712996	76713164	chr18-112	Skor2 (-143325), Smad2 (+471500)
chr18	77034870	77035038	chr18-67	Katnal2 (+12342), Hdhd2 (+90536)
chr18	77488717	77488885	chr18-13	Rnf165 (+76335), Loxhd1 (+206843)
chr18	77555538	77555706	chr18-114	Rnf165 (+9514), Loxhd1 (+273664)
chr18	77560646	77560814	chr18-83	Rnf165 (+4406), Loxhd1 (+278772)
chr18	81042264	81042432	chr18-34	Sall3 (-55770)
chr18	81252050	81252218	chr18-11	Sall3 (-265556)
chr18	81401442	81401610	chr18-8	Sall3 (-414948)
chr18	81669203	81669371	chr18-2	Sall3 (-682709), Galr1 (+737490)
chr18	81956580	81956748	chr18-35	Sall3 (-970086), Galr1 (+450113)
chr18	82477350	82477518	chr18-5	Mbp (+2272), Zfp236 (+215449)
chr18	82685325	82685493	chr18-116	Zfp236 (+7474), Mbp (+210247)
chr18	82777504	82777672	chr18-84	Zfp516 (-133291), Zfp236 (-84705)
chr18	82798668	82798836	chr18-85	Zfp516 (-112127), Zfp236 (-105869)
chr18	82952997	82953165	chr18-26	Zfp516 (+42202)
chr18	83256010	83256178	chr18-9	Zfp516 (+345215), Tshz1 (+830310)
chr18	84742430	84742598	chr18-86	Cyb5 (-108824), Fam69c (+22272)
chr18	85301039	85301207	chr18-56	Timm21 (-349599)
chr18	86462925	86463093	chr18-87	Cbln2 (-249056), Neto1 (+68057)
chr19	3419376	3419544	chr19-55	Gal (-4988)
chr19	3451790	3451958	chr19-2	Gal (-37402), Ppp6r3 (+123875)
chr19	3651505	3651673	chr19-68	Ppp6r3 (-75840), Lrp5 (+34967)
chr19	4046106	4046274	chr19-21	Gstp2 (-4025)
chr19	4861101	4861269	chr19-69	Ctsf (+6056), Actn3 (+16724)
chr19	4928132	4928300	chr19-29	Dpp3 (+71)
chr19	5224726	5224894	chr19-9	Klc2 (-106250), Pacs1 (+48309)
chr19	5525268	5525436	chr19-70	Snx32 (-14863), Ovol1 (+35223)
chr19	5696012	5696180	chr19-18	Kcnk7 (-8271), Map3k11 (+6965)
chr19	5810666	5810834	chr19-44	Scyl1 (-39349), Frmd8 (+64524)
chr19	5846538	5846706	chr19-24	Scyl1 (-75221), Frmd8 (+28652)
chr19	6216186	6216354	chr19-72	Gpha2 (-10118), 1700123I01Rik (+31803)
chr19	6634560	6634728	chr19-40	Slc22a12 (-91625), Rps6ka4 (+205957)
chr19	6979454	6979622	chr19-48	Fkbp2 (+902)
chr19	6997817	6997985	chr19-14	Nudt22 (-1784), Trpt1 (+1770)
chr19	6999811	6999979	chr19-49	Nudt22 (-3778), Trpt1 (+3764)
chr19	7265994	7266162	chr19-13	Rcor2 (-3686)
chr19	9066377	9066545	chr19-12	Scgb1a1 (+21497), Ahnak (+77177)
chr19	10072083	10072251	chr19-16	Fads2 (+29336), Fads3 (+30619)
chr19	10258254	10258422	chr19-75	Myrf (-17590), Dagla (+46539)
chr19	10362362	10362530	chr19-33	Dagla (-57569), Syt7 (-26644)
chr19	10707503	10707671	chr19-76	Vps37c (+18772), Cd5 (+31387)
chr19	10972907	10973075	chr19-41	Ccdc86 (-23725), Ms4a10 (+1679)
chr19	11299663	11299831	chr19-34	Ms4a5 (-15934), Ms4a7 (+36397)
chr19	11400133	11400301	chr19-77	Ms4a7 (-64073), Ms4a4c (-7444)
chr19	11912250	11912418	chr19-15	Patl1 (-65)
chr19	12488202	12488370	chr19-50	Dtx4 (+13710), Mpeg1 (+27507)
chr19	16252018	16252186	chr19-45	Gna14 (-183565), Gnaq (+119271)
chr19	16598977	16599145	chr19-25	Gna14 (+163394), Vps13a (+181761)
chr19	18426677	18426845	chr19-78	Pcsk5 (-589129), Ostf1 (+205028)
chr19	21175427	21175595	chr19-35	Tmc1 (-221309), Zfand5 (-96767)
chr19	21778122	21778290	chr19-79	Tmem2 (-136)
chr19	21816278	21816446	chr19-46	Trpm3 (-322757), Tmem2 (+38020)
chr19	22887022	22887190	chr19-10	Klf9 (-254120), Trpm3 (+747987)
chr19	23075896	23076064	chr19-36	Klf9 (-65246), Trpm3 (+936861)
chr19	23094985	23095153	chr19-80	Klf9 (-46157), Trpm3 (+955950)
chr19	24192681	24192849	chr19-81	Tjp2 (+32261), 1700021P04Rik (+127972)
chr19	24242295	24242463	chr19-59	Tjp2 (-17353), Fxn (+38226)
chr19	24317903	24318071	chr19-82	Fxn (-37382), Fam122a (+159369)
chr19	24686559	24686727	chr19-22	Tmem252 (+12635), Pgm5 (+175212)
chr19	25257596	25257764	chr19-60	Dmrt1 (-247938), Kank1 (+20705)
chr19	29999399	29999567	chr19-23	Trpd52l3 (-4307)
chr19	31255932	31256100	chr19-5	Cstf2t (+173175), Prkg1 (+408354)
chr19	31461135	31461303	chr19-19	Prkg1 (+203151), Cstf2t (+378378)
chr19	33170840	33171008	chr19-84	Rnls (+221341), Pten (+413427)
chr19	36398527	36398695	chr19-8	Ankrd1 (-278767), Pcgf5 (-11137)
chr19	37393177	37393345	chr19-61	Hhex (-39626), Kif11 (+16858)
chr19	37795810	37795978	chr19-86	Cyp26a1 (+98086), Myof (+247683)
chr19	38060135	38060303	chr19-62	Ffar4 (-36860), Cep55 (+5177)
chr19	38875929	38876097	chr19-88	Hells (-54902), Tbc1d12 (+39434)
chr19	40894593	40894761	chr19-89	Zfp518a (-28)
chr19	41697510	41697678	chr19-90	Slit1 (+46071), AI606181 (+104231)
chr19	42795409	42795577	chr19-42	Hps1 (-15515), Hpse2 (+592818)
chr19	45024780	45024948	chr19-7	Lzts2 (+9688), Pdzd7 (+21750)
chr19	45026250	45026418	chr19-26	Lzts2 (+11158), Pdzd7 (+20280)
chr19	45065925	45066093	chr19-51	Kazald1 (-9232), Sfxn3 (+18433)
chr19	45075528	45075696	chr19-63	Kazald1 (+371)
chr19	45293612	45293780	chr19-91	Btrc (-70038), Lbx1 (-57885)
chr19	45560195	45560363	chr19-27	Dpcd (-336), Poll (+252)
chr19	46373789	46373957	chr19-30	Tmem180 (+16993), Actr1a (+21862)
chr19	46490617	46490785	chr19-47	Trim8 (-10947), Sufu (+93783)
chr19	46518111	46518279	chr19-4	Trim8 (+16547), Arl3 (+54890)
chr19	46518653	46518821	chr19-1	Trim8 (+17089), Arl3 (+54348)
chr19	46567329	46567497	chr19-92	Arl3 (+5672), Trim8 (+65765)
chr19	46618421	46618589	chr19-52	Wbp1l (+19391), Cyp17a1 (+54469)
chr19	47019389	47019557	chr19-11	Nt5c2 (-4320)
chr19	47222602	47222770	chr19-37	Neurl1a (+43866), Sh3pxd2a (+241725)
chr19	47327999	47328167	chr19-3	Sh3pxd2a (+136328), Neurl1a (+149263)
chr19	47357324	47357492	chr19-93	Sh3pxd2a (+107003), Neurl1a (+178588)
chr19	47492019	47492187	chr19-38	Sh3pxd2a (-27692), Obfc1 (+45016)
chr19	47654986	47655154	chr19-17	Col17a1 (+37024), Slk (+75051)
chr19	50678320	50678488	chr19-94	Sorcs1 (+242)
chr19	53462592	53462760	chr19-95	Smndc1 (-72103), Dusp5 (-66433)
chr19	53676401	53676569	chr19-54	Rbm20 (-821)
chr19	53740450	53740618	chr19-64	Pdcd4 (-151697), Rbm20 (+63228)
chr19	55271615	55271783	chr19-43	Acsl5 (+18330), Zdhhc6 (+44333)
chr19	56419669	56419837	chr19-39	Plekhs1 (-41884), Casp7 (+22624)
chr19	57479815	57479983	chr19-97	Atrnl1 (-131135), Trub1 (+26993)
chr19	58691386	58691554	chr19-20	Pnliprp1 (-37417), Pnlip (+21105)
chr19	59585909	59586077	chr19-66	Emx2 (+127621), Rab11fip2 (+357371)
chr2	3546729	3546897	chr2-119	Fam107b (-166645), Cdnf (+33748)
chr2	5667625	5667793	chr2-109	Camk1d (+46806), Ccdc3 (+529933)
chr2	8206991	8207159	chr2-234	NONE
chr2	11062244	11062412	chr2-55	Prkcq (-110054), Sfmbt2 (+689878)
chr2	11679331	11679499	chr2-60	Il15ra (-26362), Il2ra (+36623)
chr2	11822082	11822250	chr2-235	Ankrd16 (+43675), Itga8 (+479754)
chr2	17004908	17005076	chr2-167	Plxdc2 (+648688), Nebl (+726051)
chr2	17706001	17706169	chr2-236	Nebl (+24958)
chr2	18195528	18195696	chr2-238	Mllt10 (+140375), Dnajc1 (+197218)
chr2	18392757	18392925	chr2-146	Dnajc1 (-11)
chr2	18893430	18893598	chr2-13	Pip4k2a (+104612), BC061194 (+194491)
chr2	19392501	19392669	chr2-191	Ptf1a (-53078), Msrb2 (+20949)
chr2	19716009	19716177	chr2-192	Etl4 (-573820), Otud1 (+58031)
chr2	20209450	20209618	chr2-239	Etl4 (-80379), Otud1 (+551472)
chr2	20665701	20665869	chr2-73	Arhgap21 (+301936), Etl4 (+375872)
chr2	23998956	23999124	chr2-168	Spopl (-426936), Hnmt (+50354)
chr2	24088216	24088384	chr2-240	Hnmt (-38906), Tbpl2 (+8295)
chr2	25035073	25035241	chr2-57	Nsmf (-19198), Pnpla7 (+59124)
chr2	25185809	25185977	chr2-91	Nrarp (+5135), Tor4a (+10993)
chr2	25797634	25797802	chr2-61	Glt6d1 (+18130), Lcn11 (+20701)
chr2	26171003	26171171	chr2-31	Nacc2 (-78910), Lhx3 (+35488)
chr2	26196933	26197101	chr2-241	Nacc2 (-104840), Lhx3 (+9558)
chr2	26298970	26299138	chr2-169	4932418E24Rik (-4497)
chr2	26356960	26357128	chr2-242	Dnlz (-4934)
chr2	26458941	26459109	chr2-147	Sec16a (-13809), Notch1 (+44797)
chr2	26461004	26461172	chr2-74	Sec16a (-15872), Notch1 (+42734)
chr2	26611262	26611430	chr2-129	Fam69b (-17111), Agpat2 (-7014)
chr2	26902929	26903097	chr2-148	Surf6 (-134)
chr2	27122088	27122256	chr2-92	Fam163b (+20319), Adamtsl2 (+42793)
chr2	27505655	27505823	chr2-149	Brd3 (-30066), Wdr5 (-9418)
chr2	28202388	28202556	chr2-130	Olfm1 (-3187)
chr2	28369340	28369508	chr2-193	Ppp1r26 (-78517), Olfm1 (+163765)
chr2	28523620	28523788	chr2-244	Ralgds (-9838), Gm10134 (+17609)
chr2	28538032	28538200	chr2-62	Ralgds (+4574), Cel (+25246)
chr2	28607409	28607577	chr2-30	Gtf3c5 (-24214), Gfi1b (+14489)
chr2	28908172	28908340	chr2-98	Barhl1 (+8156), Ddx31 (+67797)
chr2	29493468	29493636	chr2-194	Rapgef1 (-126168), Med27 (+146733)
chr2	29501146	29501314	chr2-170	Rapgef1 (-118490), Med27 (+154411)
chr2	29501573	29501741	chr2-245	Rapgef1 (-118063), Med27 (+154838)
chr2	29628995	29629163	chr2-151	Gm13547 (-132449), Rapgef1 (+9359)
chr2	29751305	29751473	chr2-152	Gm13547 (-10139), Rapgef1 (+131669)
chr2	29934471	29934639	chr2-195	Gle1 (-871)
chr2	30158182	30158350	chr2-247	Endog (-13227), Tbc1d13 (+24520)
chr2	30445449	30445617	chr2-153	Ier5l (+28666), Ppp2r4 (+29494)
chr2	30556631	30556799	chr2-131	Ier5l (-82516), Cstad (-38325)
chr2	30779835	30780003	chr2-23	1700001O22Rik (+21788), Cstad (+184879)
chr2	31436342	31436510	chr2-35	Ass1 (-33781), Hmcn2 (+122011)
chr2	31869788	31869956	chr2-32	Fibcd1 (-23867), Lamc3 (-17472)
chr2	31870798	31870966	chr2-8	Fibcd1 (-24877), Lamc3 (-16462)
chr2	31901600	31901768	chr2-196	Aif1l (-48576), Lamc3 (+14340)
chr2	32162279	32162447	chr2-171	Pomt1 (-74227), Prrc2b (+11215)
chr2	32167988	32168156	chr2-45	Pomt1 (-68518), Prrc2b (+16924)
chr2	32302698	32302866	chr2-197	Ciz1 (-49545), Golga2 (+14529)
chr2	32303565	32303733	chr2-63	Ciz1 (-48678), Golga2 (+15396)
chr2	32422268	32422436	chr2-82	Naif1 (-28105), Ptges2 (+26456)
chr2	32713229	32713397	chr2-198	Cdk9 (-529)
chr2	33438520	33438688	chr2-173	Zbtb34 (-7280), Zbtb43 (+23749)
chr2	34073396	34073564	chr2-36	Mvb12b (-185534), Pbx3 (+298770)
chr2	34480285	34480453	chr2-83	Mapkap1 (+73186), Gapvd1 (+274863)
chr2	34920414	34920582	chr2-132	Phf19 (-6522), Traf1 (+37636)
chr2	35085131	35085299	chr2-248	Hc (-23777), AI182371 (+15470)
chr2	38688915	38689083	chr2-99	Psmb7 (-44912), Nr5a1 (+23235)
chr2	38975456	38975624	chr2-249	Wdr38 (-22779), Olfml2a (+43562)
chr2	38976551	38976719	chr2-44	Wdr38 (-21684), Olfml2a (+44657)
chr2	38992074	38992242	chr2-42	Wdr38 (-6161), Olfml2a (+60180)
chr2	39190915	39191083	chr2-121	Scai (-269)
chr2	40094101	40094269	chr2-250	Ppp6c (-867734)
chr2	44538246	44538414	chr2-174	Gtdc1 (+323292), Arhgap15 (+789460)
chr2	46193561	46193729	chr2-251	NONE
chr2	49817431	49817599	chr2-84	Lypd6 (-248949), Lypd6b (+29827)
chr2	50105641	50105809	chr2-252	Lypd6 (+39261), Mmadhc (+190992)
chr2	53209724	53209892	chr2-253	Arl6ip6 (+17720), Rprm (+875744)
chr2	59229353	59229521	chr2-133	Dapl1 (-255216), Pkp4 (+68587)
chr2	60411644	60411812	chr2-200	Ly75 (-28497), Pla2r1 (+141580)
chr2	60552992	60553160	chr2-175	Pla2r1 (+232)
chr2	61403302	61403470	chr2-122	Rbms1 (-521948), Tank (-175200)
chr2	68364254	68364422	chr2-46	Stk39 (+107930), B3galt1 (+246625)
chr2	69994428	69994596	chr2-100	Myo3b (-44614), Ubr3 (+97266)
chr2	70819644	70819812	chr2-177	Tlk1 (+6000), Gorasp2 (+158152)
chr2	70877560	70877728	chr2-256	Tlk1 (-51916), Mettl8 (+177939)
chr2	71387882	71388050	chr2-134	Hat1 (-1294)
chr2	71872695	71872863	chr2-178	Pdk1 (-445)
chr2	72383891	72384059	chr2-257	Cdca7 (-92184), B230120H23Rik (+98338)
chr2	72516404	72516572	chr2-258	Cdca7 (+40329), Sp3 (+463958)
chr2	74426870	74427038	chr2-203	Atp5g3 (-515629), Lnp (+151994)
chr2	75633998	75634166	chr2-123	Hnrnpa3 (-25179), Mtx2 (+808279)
chr2	75687128	75687296	chr2-204	Nfe2l2 (+17429), Hnrnpa3 (+27951)
chr2	75750464	75750632	chr2-47	Agps (-81629), Nfe2l2 (-45907)
chr2	77365771	77365939	chr2-261	Sestd1 (-100087), Zfp385b (+353884)
chr2	78189727	78189895	chr2-7	Ube2e3 (-679236), Cwc22 (-243436)
chr2	79725837	79726005	chr2-205	Ppp1r1c (+18141), Pde1a (+403018)
chr2	84445774	84445942	chr2-262	Calcrl (-20447), Tfpi (+29422)
chr2	84742738	84742906	chr2-179	Ypel4 (+8764), Serping1 (+32582)
chr2	84837231	84837399	chr2-24	Slc43a1 (-2093)
chr2	90806133	90806301	chr2-263	Mtch2 (-40938), Agbl2 (+23490)
chr2	91308811	91308979	chr2-64	Arfgap2 (+43602), 1110051M20Rik (+135747)
chr2	91309616	91309784	chr2-135	Arfgap2 (+44407), 1110051M20Rik (+134942)
chr2	91420536	91420704	chr2-206	1110051M20Rik (+24022), Arfgap2 (+155327)
chr2	91904741	91904909	chr2-25	Chrm4 (-17364), Ambra1 (+174600)
chr2	92096876	92097044	chr2-264	Phf21a (-124602), Creb3l1 (-72458)
chr2	92182278	92182446	chr2-265	Creb3l1 (-157860), Phf21a (-39200)
chr2	92948033	92948201	chr2-154	Syt13 (+33019), Prdm11 (+97454)
chr2	93177759	93177927	chr2-207	Prdm11 (-132272), Trp53i11 (-9705)
chr2	101665483	101665651	chr2-101	Rag1 (-16066), Traf6 (-12873)
chr2	102117478	102117646	chr2-136	Ldlrad3 (+68823), Commd9 (+231309)
chr2	102231537	102231705	chr2-75	Ldlrad3 (-45236), Trim44 (+169279)
chr2	102244579	102244747	chr2-155	Ldlrad3 (-58278), Trim44 (+156237)
chr2	103289489	103289657	chr2-52	Ehf (+13705), Apip (+215898)
chr2	103302858	103303026	chr2-14	Ehf (+336)
chr2	104041753	104041921	chr2-268	Gm10912 (-23989), 4931422A03Rik (-13529)
chr2	104122523	104122691	chr2-137	A930018P22Rik (-162)
chr2	104378074	104378242	chr2-20	D430041D05Rik (+32176), A930018P22Rik (+255389)
chr2	104588714	104588882	chr2-208	Cstf3 (-1725)
chr2	105114135	105114303	chr2-110	Wt1 (-12310), Gm11060 (+22201)
chr2	105153294	105153462	chr2-180	0610012H03Rik (-70942), Wt1 (+26849)
chr2	105257780	105257948	chr2-41	0610012H03Rik (+33544), Rcn1 (+141455)
chr2	105258537	105258705	chr2-17	0610012H03Rik (+34301), Rcn1 (+140698)
chr2	105263349	105263517	chr2-27	0610012H03Rik (+39113), Rcn1 (+135886)
chr2	106200306	106200474	chr2-156	Mpped2 (-492879), Dnajc24 (-196841)
chr2	106888958	106889126	chr2-270	Arl14ep (+85382), Mpped2 (+195773)
chr2	107061589	107061757	chr2-78	Fshb (-2017)
chr2	109942143	109942311	chr2-157	Ccdc34 (-75590), Lgr4 (+24580)
chr2	112265778	112265946	chr2-94	Slc12a6 (-957), Gm21985 (-452)
chr2	112676825	112676993	chr2-21	Aven (+183945), Ryr3 (+353422)
chr2	113327692	113327860	chr2-102	Fmn1 (-6)
chr2	114235692	114235860	chr2-181	Zfp770 (-34307), Atpbd4 (+419188)
chr2	116979870	116980038	chr2-111	Spred1 (-141420), Tmco5 (+101246)
chr2	119300149	119300317	chr2-65	Dll4 (-25551), Vps18 (+11491)
chr2	119324933	119325101	chr2-79	Dll4 (-767)
chr2	119337284	119337452	chr2-272	Chac1 (-13861), Dll4 (+11584)
chr2	119797142	119797310	chr2-273	Tyro3 (-2288)
chr2	119857480	119857648	chr2-274	Mga (-39664), Tyro3 (+58050)
chr2	121101543	121101711	chr2-103	Tgm5 (-15786), Tgm7 (+8168)
chr2	121826244	121826412	chr2-182	Casc4 (-40642), Frmd5 (-19241)
chr2	125134213	125134381	chr2-104	Ctxn2 (-2395)
chr2	126302460	126302628	chr2-88	Dtwd1 (+150403), Atp8b4 (+197303)
chr2	126552434	126552602	chr2-124	Slc27a2 (+111)
chr2	126871505	126871673	chr2-210	Usp50 (-88145), Trpm7 (+4641)
chr2	127444502	127444670	chr2-159	Fahd2a (-36)
chr2	127927612	127927780	chr2-112	Bcl2l11 (-198343), Acoxl (+73068)
chr2	127939356	127939524	chr2-76	Bcl2l11 (-186599), Acoxl (+84812)
chr2	128152755	128152923	chr2-276	Gm355 (-438370), Bcl2l11 (+26800)
chr2	128211935	128212103	chr2-183	Gm355 (-379190), Bcl2l11 (+85980)
chr2	128818265	128818433	chr2-105	Tmem87b (+231)
chr2	128892379	128892547	chr2-43	Fbln7 (+29482), Zc3h8 (+51614)
chr2	128911870	128912038	chr2-106	Zc3h8 (+32123), Fbln7 (+48973)
chr2	129317949	129318117	chr2-277	Il1a (-8061), Il1b (+53106)
chr2	129544666	129544834	chr2-212	Sirpa (-48455), F830045P16Rik (-8148)
chr2	130635818	130635986	chr2-77	Ubox5 (-5864), Lzts3 (+6901)
chr2	130780736	130780904	chr2-80	Slc4a11 (-83301), 4930402H24Rik (+59314)
chr2	130876107	130876275	chr2-213	4930402H24Rik (-36057), Atrn (-30304)
chr2	131142807	131142975	chr2-214	Gm11037 (+9394), 1700037H04Rik (+17129)
chr2	131190372	131190540	chr2-113	Ap5s1 (-19984), Cdc25b (+3507)
chr2	131190746	131190914	chr2-39	Ap5s1 (-19610), Cdc25b (+3881)
chr2	132781472	132781640	chr2-215	Chgb (+278)
chr2	132992633	132992801	chr2-279	Bmp2 (-559442), Fermt1 (-46811)
chr2	133596667	133596835	chr2-280	Bmp2 (+44592), Hao1 (+957617)
chr2	135073138	135073306	chr2-89	Plcb4 (-668608), Plcb1 (+287063)
chr2	135692782	135692950	chr2-184	Plcb4 (-48964), Plcb1 (+906707)
chr2	135887956	135888124	chr2-114	Lamp5 (-169887), Plcb4 (+146210)
chr2	136677518	136677686	chr2-185	Snap25 (-35851), Ankef1 (+145322)
chr2	138265315	138265483	chr2-160	Btbd3 (-13094)
chr2	142303448	142303616	chr2-283	Kif16b (+597999)
chr2	143022656	143022824	chr2-284	Kif16b (-121209), Snrpb2 (-40299)
chr2	143963677	143963845	chr2-217	Rrbp1 (+47502), Dstn (+48441)
chr2	144676953	144677121	chr2-287	Scp2d1 (-146629), Dtd1 (+77140)
chr2	146217313	146217481	chr2-70	Insm1 (-4524)
chr2	146607789	146607957	chr2-288	Plk1s1 (-247991), Ralgapa2 (-95869)
chr2	146838668	146838836	chr2-161	Ralgapa2 (-326748), Plk1s1 (-17112)
chr2	148698540	148698708	chr2-218	Gzf1 (+17601), Napb (+33843)
chr2	150608573	150608741	chr2-219	Apmap (-90)
chr2	150909662	150909830	chr2-289	Gins1 (+152)
chr2	151485601	151485769	chr2-290	4921509C19Rik (-9532), Nsfl1c (-8497)
chr2	151967328	151967496	chr2-139	Fam110a (+6523), Angpt4 (+56202)
chr2	152117212	152117380	chr2-37	Tcf15 (-26265), Srxn1 (+11566)
chr2	152707710	152707878	chr2-95	Id1 (-28457), Mcts2 (+20646)
chr2	152735205	152735373	chr2-115	Id1 (-962)
chr2	152739455	152739623	chr2-71	Cox4i2 (-15555), Id1 (+3288)
chr2	152804412	152804580	chr2-11	Bcl2l1 (+26170), Cox4i2 (+49402)
chr2	152816402	152816570	chr2-72	Bcl2l1 (+14180), Cox4i2 (+61392)
chr2	153622673	153622841	chr2-116	8430427H17Rik (-92786), Commd7 (+10024)
chr2	154130345	154130513	chr2-293	Bpifa3 (+93)
chr2	154421352	154421520	chr2-125	Cbfa2t2 (-15059), Snta1 (-13337)
chr2	154426686	154426854	chr2-48	Snta1 (-18671), Cbfa2t2 (-9725)
chr2	154427879	154428047	chr2-16	Snta1 (-19864), Cbfa2t2 (-8532)
chr2	154449986	154450154	chr2-140	1700003F12Rik (-98818), Cbfa2t2 (+13575)
chr2	154456729	154456897	chr2-162	1700003F12Rik (-92075), Cbfa2t2 (+20318)
chr2	154466074	154466242	chr2-34	1700003F12Rik (-82730), Cbfa2t2 (+29663)
chr2	154639321	154639489	chr2-38	4930519P11Rik (-25968), Chmp4b (-17613)
chr2	155050652	155050820	chr2-66	Ahcy (+23761), Gm14226 (+32470)
chr2	155314729	155314897	chr2-294	Map1lc3a (+38516), Pigu (+42617)
chr2	155850223	155850391	chr2-117	Fam83c (-15453), Uqcc (+80003)
chr2	155961969	155962137	chr2-126	Cep250 (+5495), 6430550D23Rik (+42374)
chr2	156199993	156200161	chr2-295	Cnbd2 (-112222), Phf20 (+3435)
chr2	156531395	156531563	chr2-187	Aar2 (-16117), Epb4.1l1 (+110570)
chr2	156841792	156841960	chr2-221	Tgif2 (+1799), 4930518I15Rik (+16070)
chr2	157027348	157027516	chr2-90	Dsn1 (-20278), Soga1 (+51822)
chr2	157059179	157059347	chr2-107	Dsn1 (-52109), Soga1 (+19991)
chr2	157290678	157290846	chr2-222	Mroh8 (-11213), Ghrh (+55893)
chr2	157532927	157533095	chr2-297	Nnat (-27099), Src (+108718)
chr2	157943974	157944142	chr2-299	Vstm2l (+29405), Tti1 (+84375)
chr2	158799356	158799524	chr2-58	Dhx35 (+4633)
chr2	161166685	161166853	chr2-163	Chd6 (-57747)
chr2	161545584	161545752	chr2-85	Chd6 (-436646)
chr2	163032850	163033018	chr2-301	Mybl2 (-21753), Ift52 (+15580)
chr2	163090323	163090491	chr2-303	Gtsf1l (-2624)
chr2	163449394	163449562	chr2-2	2310001K24Rik (-23067), Gdap1l1 (+11002)
chr2	163481620	163481788	chr2-67	R3hdml (-10614), Fitm2 (-9075)
chr2	163717031	163717199	chr2-96	Pkig (+23077), Ada (+33124)
chr2	164020867	164021035	chr2-304	Pabpc1l (-4499)
chr2	164435695	164435863	chr2-118	Matn4 (-31165), Sdc4 (+7407)
chr2	164671047	164671215	chr2-6	Wfdc9 (-14548), Wfdc11 (+2956)
chr2	164805158	164805326	chr2-188	Acot8 (-360), Zswim3 (+144)
chr2	164821139	164821307	chr2-108	Zswim1 (-1463)
chr2	164913484	164913652	chr2-224	Zfp335 (-1811)
chr2	165317484	165317652	chr2-305	Elmo2 (-665)
chr2	165693057	165693225	chr2-15	Eya2 (+37843), Zmynd8 (+165032)
chr2	165815188	165815356	chr2-141	Zmynd8 (+42901), Eya2 (+159974)
chr2	165828877	165829045	chr2-225	Zmynd8 (+29212), Eya2 (+173663)
chr2	165900340	165900508	chr2-142	Ncoa3 (-92213), Zmynd8 (-42251)
chr2	166194198	166194366	chr2-226	Sulf2 (-38619), Prex1 (+519550)
chr2	166389672	166389840	chr2-33	Sulf2 (-234093), Prex1 (+324076)
chr2	166489257	166489425	chr2-227	Sulf2 (-333678), Prex1 (+224491)
chr2	166721894	166722062	chr2-164	Trp53rk (-71789), Prex1 (-8146)
chr2	166887898	166888066	chr2-228	Cse1l (-18077), Arfgef2 (+82394)
chr2	166980291	166980459	chr2-307	Stau1 (+15890), Cse1l (+74316)
chr2	167072433	167072601	chr2-40	Znfx1 (-9502), Kcnb1 (+116282)
chr2	167090868	167091036	chr2-18	Znfx1 (-27937), Kcnb1 (+97847)
chr2	167109611	167109779	chr2-189	Znfx1 (-46680), Kcnb1 (+79104)
chr2	167423307	167423475	chr2-53	Rnf114 (-69254), Slc9a8 (+1679)
chr2	167503304	167503472	chr2-143	Snai1 (-34807), Spata2 (-10501)
chr2	167537938	167538106	chr2-144	Snai1 (-173)
chr2	167540272	167540440	chr2-29	Snai1 (+2161), Ube2v1 (+91739)
chr2	167582354	167582522	chr2-9	Snai1 (+44243), Ube2v1 (+49657)
chr2	168023645	168023813	chr2-19	Pard6b (-57275), Fam65c (-13111)
chr2	168423229	168423397	chr2-10	Kcng1 (-142181), Nfatc2 (+166947)
chr2	168950844	168951012	chr2-308	Sall4 (-183727), Zfp64 (+4344)
chr2	169421508	169421676	chr2-12	Zfp64 (-466320), 1700101G07Rik (-160489)
chr2	170465668	170465836	chr2-49	Bcas1 (-37924), Cyp24a1 (+31393)
chr2	172412555	172412723	chr2-68	Rtfdc1 (-27917), Cass4 (+18739)
chr2	172516596	172516764	chr2-59	Tfap2c (-34311), Fam209 (+44160)
chr2	172522913	172523081	chr2-230	Tfap2c (-27994), Fam209 (+50477)
chr2	172977509	172977677	chr2-127	Spo11 (-2256)
chr2	173732643	173732811	chr2-310	Vapb (-4784)
chr2	178603489	178603657	chr2-69	Cdh4 (-838858), Cdh26 (+172966)
chr2	178634316	178634484	chr2-311	Cdh4 (-808031), Cdh26 (+203793)
chr2	178635782	178635950	chr2-145	Cdh4 (-806565), Cdh26 (+205259)
chr2	179350945	179351113	chr2-231	Cdh4 (-91402), Cdh26 (+920422)
chr2	179391923	179392091	chr2-54	Cdh4 (-50424), Cdh26 (+961400)
chr2	179395500	179395668	chr2-312	Cdh4 (-46847), Cdh26 (+964977)
chr2	179519979	179520147	chr2-128	Gm10711 (-373846), Cdh4 (+77632)
chr2	180024524	180024692	chr2-313	Lsm14b (-379)
chr2	180693740	180693908	chr2-314	Tcfl5 (-51116), Dido1 (+8526)
chr2	180761888	180762056	chr2-22	Bhlhe23 (+14928), Slc17a9 (+36709)
chr2	181188858	181189026	chr2-56	Ppdpf (+1695), Ptk6 (+13847)
chr2	181241034	181241202	chr2-315	Helz2 (+909)
chr3	3667754	3667922	chr3-65	Gm8775 (-543878), Hnf4g (+159808)
chr3	6173809	6173977	chr3-112	Pex2 (-597743), 1700008P02Rik (+446550)
chr3	7805179	7805347	chr3-73	Stmn2 (-704264), Il7 (-191836)
chr3	8005814	8005982	chr3-114	Stmn2 (-503629), Il7 (-392471)
chr3	8702952	8703120	chr3-9	Hey1 (-35997), Mrps28 (+220882)
chr3	8985873	8986041	chr3-116	Zbtb10 (-264645), Tpd52 (-21909)
chr3	9036787	9036955	chr3-87	Zbtb10 (-213731), Tpd52 (-72823)
chr3	9082121	9082289	chr3-46	Zbtb10 (-168397), Tpd52 (-118157)
chr3	9105619	9105787	chr3-36	Zbtb10 (-144899), Tpd52 (-141655)
chr3	9500849	9501017	chr3-47	Zfp704 (+109152), Zbtb10 (+250331)
chr3	9540509	9540677	chr3-1	Zfp704 (+69492), Zbtb10 (+289991)
chr3	10286508	10286676	chr3-119	Fabp4 (-78016), Fabp12 (+14591)
chr3	11212401	11212569	chr3-37	Snx16 (-772361)
chr3	12328498	12328666	chr3-54	NONE
chr3	14863255	14863423	chr3-120	Car3 (-199)
chr3	18256636	18256804	chr3-121	Cyp7b1 (-13382), Armc1 (+906345)
chr3	19245662	19245830	chr3-88	Mtfr1 (+57636), Pde7a (+65576)
chr3	20119238	20119406	chr3-122	Gyg (+35774), Hltf (+61511)
chr3	22156462	22156630	chr3-18	Tbl1xr1 (+79894)
chr3	22297924	22298092	chr3-26	Tbl1xr1 (+221356)
chr3	27162026	27162194	chr3-89	Nceh1 (-20855), Ect2 (-8249)
chr3	27205070	27205238	chr3-90	Tnfsf10 (-111874), Nceh1 (+22189)
chr3	28038186	28038354	chr3-74	Tnik (-225293), Pld1 (+99575)
chr3	30344165	30344333	chr3-123	Gm10258 (-74302), Actrt3 (+255690)
chr3	31975051	31975219	chr3-66	Kcnmb2 (+72432), Zmat3 (+390543)
chr3	32238509	32238677	chr3-27	Zmat3 (+127085), Kcnmb2 (+335890)
chr3	32759370	32759538	chr3-125	Usp13 (-58092), Mrpl47 (-22307)
chr3	33053212	33053380	chr3-91	Pex5l (+29733), Usp13 (+235750)
chr3	33580698	33580866	chr3-92	Pex5l (-497753), Ttc14 (-219469)
chr3	33979503	33979671	chr3-126	Ccdc39 (-135286), Gm9791 (+25924)
chr3	33991008	33991176	chr3-23	Ccdc39 (-146791), Gm9791 (+14419)
chr3	35028100	35028268	chr3-55	Atp11b (-725950), Sox2 (+378179)
chr3	35474462	35474630	chr3-41	Atp11b (-279588), Sox2 (+824541)
chr3	35723639	35723807	chr3-44	Atp11b (-30411)
chr3	36551391	36551559	chr3-6	Exosc9 (-1131)
chr3	37282513	37282681	chr3-127	Il21 (-49979), Cetn4 (+29849)
chr3	37966219	37966387	chr3-7	Gm5148 (-241974), Ankrd50 (+518541)
chr3	38564664	38564832	chr3-93	Fat4 (-322192), Ankrd50 (-79904)
chr3	41583687	41583855	chr3-48	Phf17 (+20388), Sclt1 (+158743)
chr3	41595108	41595276	chr3-2	Phf17 (+31809), Sclt1 (+147322)
chr3	45230944	45231112	chr3-128	Pcdh10 (-147370)
chr3	47177470	47177638	chr3-76	Pabpc4l (-729613)
chr3	51247791	51247959	chr3-67	Ccrn4l (+23428), Elf2 (+92691)
chr3	51398818	51398986	chr3-56	Mgarp (-2354)
chr3	52831207	52831375	chr3-42	Cog6 (+185932), Foxo1 (+562954)
chr3	53151719	53151887	chr3-3	Lhfp (+110275), Nhlrc3 (+311488)
chr3	53593797	53593965	chr3-30	Frem2 (+63474), Stoml3 (+105154)
chr3	54678900	54679068	chr3-10	Supt20 (-13839), Gm5641 (+197555)
chr3	56589230	56589398	chr3-130	Nbea (-405613), F830104G03Rik (+301279)
chr3	58591712	58591880	chr3-77	2810407C02Rik (+15160), Fam194a (+45411)
chr3	58871925	58872093	chr3-4	Siah2 (-179609), Clrn1 (+13203)
chr3	59540620	59540788	chr3-94	Igsf10 (-196448), Gm5709 (+95029)
chr3	66687233	66687401	chr3-32	Veph1 (-390480), Shox2 (+294454)
chr3	66973800	66973968	chr3-95	Veph1 (-677047), Shox2 (+7887)
chr3	67449783	67449951	chr3-96	Lxn (+14059), Gfm1 (+19771)
chr3	67504796	67504964	chr3-57	Lxn (-40954), Rarres1 (+10643)
chr3	68565177	68565345	chr3-97	Il12a (-125383), Schip1 (+500459)
chr3	72858935	72859103	chr3-131	Sis (+108844)
chr3	73974314	73974482	chr3-132	Bche (-265983)
chr3	75164919	75165087	chr3-12	Zbbx (-21231), Serpini2 (+105075)
chr3	75651741	75651909	chr3-134	Serpini1 (+94278), Golim4 (+305104)
chr3	75839336	75839504	chr3-135	Golim4 (+117509), Serpini1 (+281873)
chr3	76121732	76121900	chr3-50	Fstl5 (+47546)
chr3	84033949	84034117	chr3-99	Tlr2 (-192266), D930015E06Rik (+6128)
chr3	84040162	84040330	chr3-68	D930015E06Rik (-85)
chr3	84333612	84333780	chr3-69	Trim2 (-73884), Fhdc1 (+145795)
chr3	84665641	84665809	chr3-51	Tmem154 (-467)
chr3	84938124	84938292	chr3-8	Pet112 (-635911), Fbxw7 (+122940)
chr3	86223634	86223802	chr3-25	Lrba (-972)
chr3	86863506	86863674	chr3-136	Mab21l2 (-315307), Dclk2 (+57294)
chr3	86919639	86919807	chr3-21	Mab21l2 (-371440), Dclk2 (+1161)
chr3	86936329	86936497	chr3-78	Cd1d2 (-50173), Dclk2 (-15529)
chr3	86993212	86993380	chr3-15	Cd1d1 (+6145), Cd1d2 (+6710)
chr3	87049524	87049692	chr3-100	Cd1d1 (-50167), Kirrel (+125139)
chr3	88096320	88096488	chr3-102	Mef2d (-45968), Iqgap3 (+14353)
chr3	88596629	88596797	chr3-58	Arhgef2 (-24393), Ssr2 (+17042)
chr3	88651870	88652038	chr3-59	Rxfp4 (+1188), Arhgef2 (+30848)
chr3	89378483	89378651	chr3-138	Dcst1 (-13314), Zbtb7b (+9104)
chr3	90224463	90224631	chr3-33	Jtb (-7050), Rab13 (+3760)
chr3	90539362	90539530	chr3-70	S100a2 (-50801), S100a16 (+2192)
chr3	90623469	90623637	chr3-52	S100a7a (-30749), S100a6 (+10659)
chr3	91964634	91964802	chr3-140	9130204L05Rik (-873913), Pglyrp3 (-49865)
chr3	94386811	94386979	chr3-38	Lingo4 (-11622), Rorc (+14101)
chr3	95016480	95016648	chr3-79	Zfp687 (-1326)
chr3	95653087	95653255	chr3-104	Mcl1 (-5550), Ensa (+28191)
chr3	96015766	96015934	chr3-31	Plekho1 (-19849), Vps45 (+42616)
chr3	96663586	96663754	chr3-80	Ankrd35 (-6461), Itga10 (+18086)
chr3	96675699	96675867	chr3-28	Pias3 (-21300), Ankrd35 (+5652)
chr3	98024397	98024565	chr3-60	Adam30 (-136331), Notch2 (+10943)
chr3	98734457	98734625	chr3-81	Hsd3b2 (-9998), Hsd3b3 (+28529)
chr3	100925294	100925462	chr3-19	Trim45 (+2885), Ttf2 (+44285)
chr3	101130624	101130792	chr3-106	Ptgfrn (-20430), Cd2 (+157231)
chr3	101163514	101163682	chr3-34	Ptgfrn (-53320), Cd2 (+124341)
chr3	101323450	101323618	chr3-144	Igsf3 (-53591), Cd2 (-35595)
chr3	101376841	101377009	chr3-82	Igsf3 (-200)
chr3	101818648	101818816	chr3-61	Atp1a1 (-214129), Mab21l3 (+17491)
chr3	103461060	103461228	chr3-53	Syt6 (-114137), Trim33 (+181851)
chr3	104876673	104876841	chr3-147	Capza1 (-12252), Wnt2b (+84952)
chr3	105893982	105894150	chr3-39	Adora3 (-10357), Adora3 (+23159)
chr3	107681362	107681530	chr3-62	Strip1 (-49736), Ahcyl1 (+15114)
chr3	108310953	108311121	chr3-148	Mybphl (-53874), Sort1 (+26946)
chr3	108856933	108857101	chr3-22	Stxbp3a (-16506), Fndc7 (+32991)
chr3	108904808	108904976	chr3-149	Fndc7 (-14884), Prpf38b (+6835)
chr3	117010299	117010467	chr3-43	Palmd (-41396), 1700061I17Rik (+67382)
chr3	117293421	117293589	chr3-107	1700061I17Rik (-215740), D3Bwg0562e (+67371)
chr3	121736565	121736733	chr3-150	F3 (+13112), Abcd3 (+78653)
chr3	127257710	127257878	chr3-63	Ank2 (-259333), Larp7 (+295554)
chr3	127267899	127268067	chr3-20	Ank2 (-269522), Larp7 (+285365)
chr3	129918521	129918689	chr3-13	Casp6 (+17180), Ccdc109b (+51601)
chr3	131034908	131035076	chr3-84	Rpl34 (-304655), Lef1 (-75479)
chr3	132023290	132023458	chr3-108	Dkk2 (-61918), Papss1 (+458606)
chr3	136699894	136700062	chr3-14	Emcn (-641089), Ppp3ca (+29208)
chr3	137623967	137624135	chr3-85	Ddit4l (+379)
chr3	137867283	137867451	chr3-40	Dnajb14 (-308)
chr3	137979544	137979712	chr3-152	Dapp1 (+1917), Lamtor3 (+61102)
chr3	138008475	138008643	chr3-153	1110002E22Rik (-56493), Dapp1 (-27014)
chr3	138132747	138132915	chr3-154	Gm5105 (-65443), Mttp (+10557)
chr3	138438901	138439069	chr3-109	Adh5 (-4108)
chr3	139005833	139006001	chr3-71	Rap1gds1 (+69282), Tspan5 (+263722)
chr3	139006325	139006493	chr3-11	Rap1gds1 (+68790), Tspan5 (+264214)
chr3	144639506	144639674	chr3-157	Sep15 (+69164), Sh3glb1 (+80733)
chr3	144643686	144643854	chr3-35	Sep15 (+73344), Sh3glb1 (+76553)
chr3	144720185	144720353	chr3-45	Sh3glb1 (+54)
chr3	144947291	144947459	chr3-158	AI747448 (-14846), Clca6 (+27670)
chr3	146404405	146404573	chr3-86	Ssx2ip (-153)
chr3	147570559	147570727	chr3-159	Ttll7 (+718276)
chr3	152495691	152495859	chr3-160	Zzz3 (+99772), Ak5 (+172365)
chr3	152944853	152945021	chr3-64	St6galnac5 (+37309), Pigk (+230824)
chr3	153127942	153128110	chr3-17	St6galnac5 (-145780), St6galnac3 (+597036)
chr3	154131133	154131301	chr3-110	Slc44a5 (+157781), Lhx8 (+199434)
chr3	154775172	154775340	chr3-111	BC007180 (+13099), Tnni3k (+280151)
chr3	159139165	159139333	chr3-161	Lrrc7 (-577028), Depdc1a (-356184)
chr4	3835369	3835537	chr4-239	Rps20 (+212)
chr4	4424679	4424847	chr4-240	Penk (-286286), Impad1 (+368592)
chr4	5515461	5515629	chr4-123	Impad1 (-722190), Fam110b (-128576)
chr4	6093474	6093642	chr4-46	Ubxn2b (-97540), Fam110b (+449437)
chr4	6115936	6116104	chr4-124	Ubxn2b (-75078), Fam110b (+471899)
chr4	8343223	8343391	chr4-241	Rab2a (-192337), Car8 (-104266)
chr4	8648167	8648335	chr4-187	Chd7 (-43114), Rab2a (+112607)
chr4	8750884	8751052	chr4-81	Clvs1 (-518349), Chd7 (+59603)
chr4	8799595	8799763	chr4-47	Clvs1 (-469638), Chd7 (+108314)
chr4	9724879	9725047	chr4-242	Gdf6 (-119409), Asph (-55801)
chr4	10932509	10932677	chr4-57	2610301B20Rik (+58095), Plekhf2 (+75083)
chr4	11053856	11054024	chr4-27	Plekhf2 (-46264), Ndufaf6 (+22264)
chr4	11055994	11056162	chr4-188	Plekhf2 (-48402), Ndufaf6 (+20126)
chr4	13096390	13096558	chr4-189	Fam92a (-924459), Runx1t1 (-654823)
chr4	13300254	13300422	chr4-24	Runx1t1 (-450959)
chr4	26249776	26249944	chr4-191	Fut9 (-449714), Manea (+97031)
chr4	26944718	26944886	chr4-64	Manea (-597911)
chr4	34239724	34239892	chr4-66	Akirin2 (-311129), Spaca1 (-189617)
chr4	34856032	34856200	chr4-192	Smim8 (-77779), Zfp292 (+26844)
chr4	35019156	35019324	chr4-247	Ifnk (-132816), Cga (+125461)
chr4	35145383	35145551	chr4-248	Ifnk (-6589), Cga (+251688)
chr4	37753402	37753570	chr4-193	NONE
chr4	38903669	38903837	chr4-250	1700009N14Rik (-546542)
chr4	40221097	40221265	chr4-92	Ddx58 (+18647), Aco1 (+78100)
[truncated: 1,189 more rows]

## Sheet: ASCL2_ChIP-seq
Chr	Start	End	PeakID	GREAT_targets
chr1	3670703	3670851	Merged-chr1-3670777-2	Xkr4 (+721)
chr1	4802656	4802804	Merged-chr1-4802730-2	Mrpl15 (-16991), Lypla1 (-5093)
chr1	9545636	9545784	Merged-chr1-9545710-2	Adhfe1 (-2238), Rrs1 (+302)
chr1	9997789	9997937	Merged-chr1-9997863-2	Gm10567 (-35054), Ppp1r42 (+11273)
chr1	11401288	11401436	Merged-chr1-11401362-2	A830018L16Rik (-12750), Prex2 (+407897)
chr1	12505335	12505483	Merged-chr1-12505409-2	Sulf1 (-187021)
chr1	12814490	12814638	Merged-chr1-12814564-2	Sulf1 (+122134), Slco5a1 (+176613)
chr1	15017641	15017789	Merged-chr1-15017715-2	Kcnb2 (-269544), Trpa1 (-98853)
chr1	16618741	16618889	Merged-chr1-16618815-1	Ube2w (+471)
chr1	16824824	16824972	Merged-chr1-16824898-2	Ly96 (+136442), Jph1 (+272991)
chr1	17506866	17507014	Merged-chr1-17506940-2	Pi15 (-94961), Gdap1 (+361578)
chr1	20058477	20058625	Merged-chr1-20058551-2	Pkhd1 (+559513), Tfap2b (+849637)
chr1	20554492	20554640	Merged-chr1-20554566-1	Pkhd1 (+63498)
chr1	34038687	34038835	Merged-chr1-34038761-1	Dst (+26936), Ccdc115 (+400911)
chr1	34074962	34075110	Merged-chr1-34075036-2	Dst (+63211), Ccdc115 (+364636)
chr1	34859881	34860029	Merged-chr1-34859955-1	Plekhb2 (+9963)
chr1	34902575	34902723	Merged-chr1-34902649-2	Plekhb2 (+52657)
chr1	35995917	35996065	Merged-chr1-35995991-2	Hs6st1 (-72409)
chr1	36061330	36061478	Merged-chr1-36061404-2	Hs6st1 (-6996)
chr1	36068622	36068770	Merged-chr1-36068696-1	Hs6st1 (+296)
chr1	36244216	36244364	Merged-chr1-36244290-2	Uggt1 (+15)
chr1	36251518	36251666	Merged-chr1-36251592-2	Uggt1 (-7287), Neurl3 (+21833)
chr1	36512650	36512798	Merged-chr1-36512724-2	Cnnm3 (+857)
chr1	36580148	36580296	Merged-chr1-36580222-2	Sema4c (-22696), Fam178b (+102961)
chr1	37130164	37130312	Merged-chr1-37130238-1	Vwa3b (-23606), Vwa3b (+100854)
chr1	37546989	37547137	Merged-chr1-37547063-2	Mgat4a (-6047), 2010300C02Rik (+173022)
chr1	38934793	38934941	Merged-chr1-38934867-2	Nms (-4282)
chr1	39192408	39192556	Merged-chr1-39192482-2	Npas2 (-1730)
chr1	39335966	39336114	Merged-chr1-39336040-2	Rpl31 (-31811), Npas2 (+141828)
chr1	39478022	39478170	Merged-chr1-39478096-2	Tbc1d8 (+651)
chr1	39956572	39956720	Merged-chr1-39956646-2	Il1r2 (-128122), Map4k4 (+55733)
chr1	42851019	42851167	Merged-chr1-42851093-1	Mrps9 (-140)
chr1	43136638	43136786	Merged-chr1-43136712-2	Fhl2 (+27249), AI597479 (+38002)
chr1	46849831	46849979	Merged-chr1-46849905-1	Slc39a10 (+4141), Dnahc7c (+240944)
chr1	47076508	47076656	Merged-chr1-47076582-2	Slc39a10 (-222536)
chr1	52079841	52079989	Merged-chr1-52079915-2	Gm3940 (+11151), Stat4 (+71671)
chr1	52953215	52953363	Merged-chr1-52953289-2	1700019D03Rik (-445)
chr1	53750077	53750225	Merged-chr1-53750151-1	Dnahc7a (-43367), Stk17b (+35073)
chr1	54485033	54485181	Merged-chr1-54485107-2	Gtf3c3 (-46136), Pgap1 (+72577)
chr1	54754395	54754543	Merged-chr1-54754469-2	Pgap1 (-196785), Ankrd44 (+171918)
chr1	55131109	55131257	Merged-chr1-55131183-1	Mob4 (-48)
chr1	55131503	55131651	Merged-chr1-55131577-2	Mob4 (+346)
chr1	55524084	55524232	Merged-chr1-55524158-2	Plcl1 (+117770)
chr1	58424662	58424810	Merged-chr1-58424736-2	Clk1 (-670)
chr1	59422957	59423105	Merged-chr1-59423031-2	Fzd7 (-59116), Cdk15 (+166124)
chr1	59516230	59516378	Merged-chr1-59516304-2	Gm973 (+40)
chr1	59697853	59698001	Merged-chr1-59697927-2	Bmpr2 (-66352), Nop58 (+12921)
chr1	60566504	60566652	Merged-chr1-60566578-2	Raph1 (+187)
chr1	60852907	60853055	Merged-chr1-60852981-1	Ctla4 (-56044), Cd28 (+106623)
chr1	63110669	63110817	Merged-chr1-63110743-2	Ino80d (+3524), Nrp2 (+407041)
chr1	63114174	63114322	Merged-chr1-63114248-2	Ino80d (+19)
chr1	64196086	64196234	Merged-chr1-64196160-2	Creb1 (-336644), Klf7 (-74771)
chr1	64299176	64299324	Merged-chr1-64299250-2	Creb1 (-233554), Klf7 (-177861)
chr1	66468051	66468199	Merged-chr1-66468125-1	Unc80 (-242)
chr1	66700685	66700833	Merged-chr1-66700759-1	Rpe (-72)
chr1	68049880	68050028	Merged-chr1-68049954-2	Cps1 (+926928)
chr1	70725680	70725828	Merged-chr1-70725754-1	Vwc2l (+39)
chr1	72226269	72226417	Merged-chr1-72226343-1	Mreg (-14036), Pecr (+57971)
chr1	72244126	72244274	Merged-chr1-72244200-1	Mreg (-31893), Pecr (+40114)
chr1	72255148	72255296	Merged-chr1-72255222-1	Mreg (-42915), Pecr (+29092)
chr1	72824416	72824564	Merged-chr1-72824490-1	Igfbp2 (-13)
chr1	72824763	72824911	Merged-chr1-72824837-1	Igfbp2 (+334)
chr1	72960249	72960397	Merged-chr1-72960323-2	Igfbp5 (-85439), Tnp1 (+55576)
chr1	74106332	74106480	Merged-chr1-74106406-2	Tns1 (+18041)
chr1	74111439	74111587	Merged-chr1-74111513-2	Tns1 (+12934)
chr1	74125263	74125411	Merged-chr1-74125337-2	Tns1 (-890), Rufy4 (-242)
chr1	74295736	74295884	Merged-chr1-74295810-2	Tmbim1 (+8551), Pnkd (+10765)
chr1	74332657	74332805	Merged-chr1-74332731-1	Gm216 (-29377), Tmbim1 (-28370)
chr1	74424081	74424229	Merged-chr1-74424155-2	Rqcd1 (-81903), Vil1 (+14779)
chr1	74601212	74601360	Merged-chr1-74601286-2	Stk36 (-159), Rnf25 (+111)
chr1	74713267	74713415	Merged-chr1-74713341-2	Cyp27a1 (-233)
chr1	74803107	74803255	Merged-chr1-74803181-2	Cdk5r2 (-51848), Wnt10a (+11665)
chr1	74809140	74809288	Merged-chr1-74809214-1	Cdk5r2 (-45815), Wnt10a (+17698)
chr1	74825025	74825173	Merged-chr1-74825099-1	Cdk5r2 (-29930), Wnt10a (+33583)
chr1	74854898	74855046	Merged-chr1-74854972-2	Cdk5r2 (-57)
chr1	74857256	74857404	Merged-chr1-74857330-1	Cdk5r2 (+2301), Fev (+28089)
chr1	75251681	75251829	Merged-chr1-75251755-2	Ptprn (+12453), Dnajb2 (+15290)
chr1	75589050	75589198	Merged-chr1-75589124-2	Slc4a3 (+42858)
chr1	75662769	75662917	Merged-chr1-75662843-1	Slc4a3 (+116577)
chr1	78310634	78310782	Merged-chr1-78310708-2	Sgpp2 (+362)
chr1	78657548	78657696	Merged-chr1-78657622-2	Utp14b (-818), Acsl3 (-203)
chr1	84694888	84695036	Merged-chr1-84694962-2	Pid1 (-410317), Dner (+1259)
chr1	84988765	84988913	Merged-chr1-84988839-1	Slc16a14 (-53714), A530032D15Rik (+121014)
chr1	85080733	85080881	Merged-chr1-85080807-1	Slc16a14 (-145682), A530032D15Rik (+29046)
chr1	85235644	85235792	Merged-chr1-85235718-1	A530032D15Rik (-125865), C130026I21Rik (+34825)
chr1	85244812	85244960	Merged-chr1-85244886-1	A530032D15Rik (-135033), C130026I21Rik (+25657)
chr1	85325525	85325673	Merged-chr1-85325599-1	C130026I21Rik (-55056), Sp110 (+273218)
chr1	85495000	85495148	Merged-chr1-85495074-1	C130026I21Rik (-224531), Sp110 (+103743)
chr1	85624960	85625108	Merged-chr1-85625034-1	Sp100 (-25016), Sp140 (+24331)
chr1	86018455	86018603	Merged-chr1-86018529-2	Spata3 (-3413)
chr1	86300201	86300349	Merged-chr1-86300275-2	B3gnt7 (-2946)
chr1	86301384	86301532	Merged-chr1-86301458-2	B3gnt7 (-1763)
chr1	86359247	86359395	Merged-chr1-86359321-1	Ncl (+134)
chr1	86434571	86434719	Merged-chr1-86434645-1	Ptma (-92091), 1700019O17Rik (+8316)
chr1	86509546	86509694	Merged-chr1-86509620-2	Ptma (-17116), 1700019O17Rik (+83291)
chr1	86526375	86526523	Merged-chr1-86526449-2	Ptma (-287)
chr1	86612176	86612324	Merged-chr1-86612250-2	Cops7b (+29346), Nppc (+58323)
chr1	87327458	87327606	Merged-chr1-87327532-2	Gigyf2 (+529)
chr1	88205580	88205728	Merged-chr1-88205654-2	Dnajb3 (+94)
chr1	88674511	88674659	Merged-chr1-88674585-2	Glrp1 (-164699), Arl4c (+27636)
chr1	88839676	88839824	Merged-chr1-88839750-2	Sh3bp4 (-230665), Arl4c (-137529)
chr1	89492393	89492541	Merged-chr1-89492467-2	D130058E05Rik (-437767), Agap1 (+37656)
chr1	89870585	89870733	Merged-chr1-89870659-2	D130058E05Rik (-59575), Agap1 (+415848)
chr1	89998804	89998952	Merged-chr1-89998878-2	Gbx2 (-65588), Asb18 (+15699)
chr1	90405067	90405215	Merged-chr1-90405141-1	Cops8 (-198284), Cxcr7 (+201161)
chr1	91413305	91413453	Merged-chr1-91413379-2	Hes6 (-157)
chr1	91414181	91414329	Merged-chr1-91414255-2	Hes6 (-1033)
chr1	91536441	91536589	Merged-chr1-91536515-1	Asb1 (-4050)
chr1	92179848	92179996	Merged-chr1-92179922-1	Hdac4 (-31529), Ndufa10 (+293938)
chr1	92365625	92365773	Merged-chr1-92365699-2	Hdac4 (-217306), Ndufa10 (+108161)
chr1	92848634	92848782	Merged-chr1-92848708-1	Gpc1 (+17063), Ankmy1 (+54198)
chr1	93190923	93191071	Merged-chr1-93190997-1	2310007B03Rik (-30049), E030010N08Rik (-24902)
chr1	93194561	93194709	Merged-chr1-93194635-2	2310007B03Rik (-33687), E030010N08Rik (-21264)
chr1	93272595	93272743	Merged-chr1-93272669-1	Mterfd2 (+33246), Sned1 (+36828)
chr1	93305884	93306032	Merged-chr1-93305958-1	Mterfd2 (-43)
chr1	105780545	105780693	Merged-chr1-105780619-2	Tnfrsf11a (-104)
chr1	118459135	118459283	Merged-chr1-118459209-1	2900060B14Rik (-462)
chr1	118748790	118748938	Merged-chr1-118748864-1	Tfcp2l1 (+120919), Gli2 (+304755)
chr1	119050038	119050186	Merged-chr1-119050112-1	Gli2 (+3507), Tfcp2l1 (+422167)
chr1	119076146	119076294	Merged-chr1-119076220-1	Gli2 (-22601), Inhbb (+346028)
chr1	119304715	119304863	Merged-chr1-119304789-2	Gli2 (-251170), Inhbb (+117459)
chr1	119305479	119305627	Merged-chr1-119305553-2	Gli2 (-251934), Inhbb (+116695)
chr1	120210931	120211079	Merged-chr1-120211005-2	Steap3 (+60077), 3110009E18Rik (+89810)
chr1	125390257	125390405	Merged-chr1-125390331-2	Actr3 (+45396)
chr1	125435842	125435990	Merged-chr1-125435916-1	Actr3 (-189)
chr1	127236480	127236628	Merged-chr1-127236554-2	Nckap5 (-405922), Mgat5 (-70208)
chr1	127677693	127677841	Merged-chr1-127677767-1	Tmem163 (+329)
chr1	127819851	127819999	Merged-chr1-127819925-2	Map3k19 (+20365), Ccnt2 (+45761)
chr1	131078808	131078956	Merged-chr1-131078882-1	Mapkapk2 (+18661), Il10 (+59037)
chr1	131179062	131179210	Merged-chr1-131179136-2	Eif2d (+25955), Rassf5 (+66122)
chr1	132200879	132201027	Merged-chr1-132200953-1	Lemd1 (+9517), Gm10188 (+28814)
chr1	132233762	132233910	Merged-chr1-132233836-1	Gm10188 (-4069)
chr1	132360886	132361034	Merged-chr1-132360960-2	Tmcc2 (+30321), Nuak2 (+44834)
chr1	132417487	132417635	Merged-chr1-132417561-2	Dstyk (+108)
chr1	132656433	132656581	Merged-chr1-132656507-1	Cntn2 (-113567), Nfasc (+85290)
chr1	132736474	132736622	Merged-chr1-132736548-2	Cntn2 (-193608), Nfasc (+5249)
chr1	133693642	133693790	Merged-chr1-133693716-2	Lax1 (-3608)
chr1	133798605	133798753	Merged-chr1-133798679-1	Lax1 (-108571), Atp2b4 (+2362)
chr1	134061101	134061249	Merged-chr1-134061175-2	Btg2 (+17945), Fmod (+23921)
chr1	134290996	134291144	Merged-chr1-134291070-1	Myog (+1066), Ppfia4 (+41858)
chr1	134443437	134443585	Merged-chr1-134443511-1	Klhl12 (-12020), Adipor1 (+28055)
chr1	134555509	134555657	Merged-chr1-134555583-2	Kdm5b (-4588)
chr1	134955705	134955853	Merged-chr1-134955779-2	Ppp1r12b (+72)
chr1	135248643	135248791	Merged-chr1-135248717-2	Elf3 (+9755), Gm4204 (+16672)
chr1	135668363	135668511	Merged-chr1-135668437-2	Nav1 (-83082), Nav1 (+19668)
chr1	135698458	135698606	Merged-chr1-135698532-2	Csrp1 (-21529), Nav1 (-10427)
chr1	136707359	136707507	Merged-chr1-136707433-2	Zfp281 (+82532), Nr5a2 (+252994)
chr1	136719978	136720126	Merged-chr1-136720052-1	Zfp281 (+95151), Nr5a2 (+240375)
chr1	136859575	136859723	Merged-chr1-136859649-2	Nr5a2 (+100778), Zfp281 (+234748)
chr1	136949044	136949192	Merged-chr1-136949118-1	Nr5a2 (+11309), Zfp281 (+324217)
chr1	143555542	143555690	Merged-chr1-143555616-1	Cdc73 (+50992)
chr1	143777164	143777312	Merged-chr1-143777238-1	Trove2 (-170), Uchl5 (-40)
chr1	146426934	146427082	Merged-chr1-146427008-2	Fam5c (-68621)
chr1	152956296	152956444	Merged-chr1-152956370-1	Nmnat2 (+1269), Lamc2 (+230077)
chr1	153071663	153071811	Merged-chr1-153071737-2	Lamc2 (+114710), Nmnat2 (+116636)
chr1	153493512	153493660	Merged-chr1-153493586-1	Dhx9 (-5926), Npl (+56128)
chr1	153641554	153641702	Merged-chr1-153641628-2	Npl (-91914), Rgs8 (-11397)
chr1	153677730	153677878	Merged-chr1-153677804-2	Rgs16 (-62545), Rgs8 (+24779)
chr1	153705082	153705230	Merged-chr1-153705156-2	Rgs16 (-35193), Rgs8 (+52131)
chr1	153733372	153733520	Merged-chr1-153733446-2	Rgs16 (-6903), Rgs8 (+80421)
chr1	154759030	154759178	Merged-chr1-154759104-2	Cacna1e (-33184), Ier5 (+340532)
chr1	155594282	155594430	Merged-chr1-155594356-2	Acbd6 (+36227), Lhx4 (+147764)
chr1	156423572	156423720	Merged-chr1-156423646-2	Axdnd1 (-2487)
chr1	156939783	156939931	Merged-chr1-156939857-1	Ralgps2 (-231)
chr1	160363536	160363684	Merged-chr1-160363610-1	Cacybp (-150718), Rabgap1l (+429328)
chr1	161002220	161002368	Merged-chr1-161002294-2	Serpinc1 (+23688), Zbtb37 (+32541)
chr1	161097091	161097239	Merged-chr1-161097165-1	Cenpl (+26398), Klhl20 (+34346)
chr1	161251020	161251168	Merged-chr1-161251094-1	Prdx6 (+125)
chr1	162570672	162570820	Merged-chr1-162570746-1	Vamp4 (+231)
chr1	165194351	165194499	Merged-chr1-165194425-2	Sft2d2 (+8)
chr1	165911671	165911819	Merged-chr1-165911745-2	Pou2f1 (+90933), Cd247 (+123022)
chr1	166003277	166003425	Merged-chr1-166003351-1	Pou2f1 (-673)
chr1	166154252	166154400	Merged-chr1-166154326-1	Gpa33 (+24088), Mael (+84418)
chr1	166155142	166155290	Merged-chr1-166155216-1	Gpa33 (+24978), Mael (+83528)
chr1	167002585	167002733	Merged-chr1-167002659-1	Fam78b (+1242), Uck2 (+221260)
chr1	167289626	167289774	Merged-chr1-167289700-1	Uck2 (-4573)
chr1	167290005	167290153	Merged-chr1-167290079-2	Uck2 (-4952)
chr1	170655649	170655797	Merged-chr1-170655723-2	Olfml2b (+11191), Atf6 (+212048)
chr1	171125999	171126147	Merged-chr1-171126073-2	1700009P17Rik (+4412), Sdhc (+24530)
chr1	171503060	171503208	Merged-chr1-171503134-1	Alyref2 (-344)
chr1	172027213	172027361	Merged-chr1-172027287-2	Vangl2 (+1157), Slamf6 (+109750)
chr1	172350550	172350698	Merged-chr1-172350624-2	Pigm (-25907), Kcnj10 (+9414)
chr1	175512287	175512435	Merged-chr1-175512361-2	Rgs7 (-21231), Fh1 (+113274)
chr1	176975013	176975161	Merged-chr1-176975087-2	Sdccag8 (+160427), Akt3 (+283116)
chr1	177258070	177258218	Merged-chr1-177258144-2	Akt3 (+59)
chr1	177441760	177441908	Merged-chr1-177441834-2	Zbtb18 (-2827)
chr1	178336659	178336807	Merged-chr1-178336733-2	Hnrnpu (+1064), Cox20 (+17603)
chr1	178707845	178707993	Merged-chr1-178707919-2	Kif26b (+178794), Smyd3 (+810115)
chr1	179072390	179072538	Merged-chr1-179072464-2	Smyd3 (+445570), Kif26b (+543339)
chr1	180284127	180284275	Merged-chr1-180284201-2	Itpkb (-46284), Psen2 (-31063)
chr1	180696685	180696833	Merged-chr1-180696759-2	Mixl1 (+275)
chr1	180890002	180890150	Merged-chr1-180890076-2	Lefty2 (-3032)
chr1	180933792	180933940	Merged-chr1-180933866-2	Lefty1 (-1156)
chr1	181256476	181256624	Merged-chr1-181256550-2	Cnih3 (-96078), Wdr26 (-44998)
chr1	181853109	181853257	Merged-chr1-181853183-2	Lbr (-10782), Enah (+166797)
chr1	181923637	181923785	Merged-chr1-181923711-1	Lbr (-81310), Enah (+96269)
chr1	182019840	182019988	Merged-chr1-182019914-2	Enah (+66)
chr1	182055288	182055436	Merged-chr1-182055362-2	Srp9 (-69388), Enah (-35382)
chr1	182191349	182191497	Merged-chr1-182191423-2	Vmn1r1 (-33104), Degs1 (+91381)
chr1	182489828	182489976	Merged-chr1-182489902-2	Capn2 (+27593), Trp53bp2 (+80730)
chr1	182686400	182686548	Merged-chr1-182686474-1	4922505E12Rik (+62706), Capn8 (+121467)
chr1	182908526	182908674	Merged-chr1-182908600-1	Tlr5 (-46188), Susd4 (+143705)
chr1	182953479	182953627	Merged-chr1-182953553-2	Tlr5 (-1235)
chr1	185879190	185879338	Merged-chr1-185879264-2	Lyplal1 (+238046), Slc30a10 (+424416)
chr1	185984891	185985039	Merged-chr1-185984965-2	Lyplal1 (+132345), Slc30a10 (+530117)
chr1	188681919	188682067	Merged-chr1-188681993-2	Kctd3 (+325847), Ush2a (+418959)
chr1	189142672	189142820	Merged-chr1-189142746-2	Kctd3 (-134906), Kcnk2 (+200607)
chr1	189830910	189831058	Merged-chr1-189830984-1	Smyd2 (+91379), Ptpn14 (+102716)
chr1	189883027	189883175	Merged-chr1-189883101-1	Smyd2 (+39262), Ptpn14 (+154833)
chr1	189991174	189991322	Merged-chr1-189991248-2	Smyd2 (-68885), Prox1 (+179432)
chr1	190161447	190161595	Merged-chr1-190161521-2	Smyd2 (-239158), Prox1 (+9159)
chr1	190168443	190168591	Merged-chr1-190168517-2	Smyd2 (-246154), Prox1 (+2163)
chr1	190168957	190169105	Merged-chr1-190169031-2	Smyd2 (-246668), Prox1 (+1649)
chr1	190448356	190448504	Merged-chr1-190448430-2	Prox1 (-277750), Rps6kc1 (+463340)
chr1	190634981	190635129	Merged-chr1-190635055-2	Prox1 (-464375), Rps6kc1 (+276715)
chr1	191268962	191269110	Merged-chr1-191269036-2	Atf3 (-85696), Nenf (+49158)
chr1	191396381	191396529	Merged-chr1-191396455-1	Ppp2r5a (+586)
chr1	191435529	191435677	Merged-chr1-191435603-1	Ppp2r5a (-38562), Dtl (+139931)
chr1	192455138	192455286	Merged-chr1-192455212-2	Kcnh1 (+264428), Hhat (+316001)
chr1	192745531	192745679	Merged-chr1-192745605-1	Hhat (+25608), Kcnh1 (+554821)
chr1	192834769	192834917	Merged-chr1-192834843-2	A730013G03Rik (-124)
chr1	193036039	193036187	Merged-chr1-193036113-1	Syt14 (-415)
chr1	194619833	194619981	Merged-chr1-194619907-1	Plxna2 (+78)
chr1	194620511	194620659	Merged-chr1-194620585-2	Plxna2 (+756)
chr10	3941075	3941223	Merged-chr10-3941149-2	Mthfd1l (-31982), Plekhg1 (+200785)
chr10	3941544	3941692	Merged-chr10-3941618-1	Mthfd1l (-31513), Plekhg1 (+201254)
chr10	4370266	4370414	Merged-chr10-4370340-2	Zbtb2 (+17768), Akap12 (+104011)
chr10	4387103	4387251	Merged-chr10-4387177-2	Zbtb2 (+931)
chr10	4712682	4712830	Merged-chr10-4712756-1	Esr1 (+100767), Syne1 (+356307)
chr10	5922360	5922508	Merged-chr10-5922434-1	Rgs17 (-34)
chr10	7133180	7133328	Merged-chr10-7133254-2	Ipcef1 (-152878), Cnksr3 (+78983)
chr10	7149914	7150062	Merged-chr10-7149988-2	Ipcef1 (-169612), Cnksr3 (+62249)
chr10	7211830	7211978	Merged-chr10-7211904-2	Cnksr3 (+333)
chr10	7582350	7582498	Merged-chr10-7582424-2	Ulbp1 (-108947), Lrp11 (-7393)
chr10	7589740	7589888	Merged-chr10-7589814-1	Lrp11 (-3)
chr10	7956570	7956718	Merged-chr10-7956644-2	Tab2 (-414)
chr10	8287401	8287549	Merged-chr10-8287475-2	Tab2 (-331245), Ust (+231350)
chr10	9795691	9795839	Merged-chr10-9795765-2	Samd5 (-120557), Stxbp5 (+105314)
chr10	9901133	9901281	Merged-chr10-9901207-2	Stxbp5 (-128)
chr10	10458096	10458244	Merged-chr10-10458170-2	Adgb (-28331), Rab32 (+100063)
chr10	10790636	10790784	Merged-chr10-10790710-2	Gm10944 (+109362), Grm1 (+291646)
chr10	11263862	11264010	Merged-chr10-11263936-2	Fbxo30 (-17394), Shprh (+114506)
chr10	13553256	13553404	Merged-chr10-13553330-2	Pex3 (-191), Adat2 (+436)
chr10	13641881	13642029	Merged-chr10-13641955-2	Pex3 (-88816), Aig1 (+227002)
chr10	14967750	14967898	Merged-chr10-14967824-2	B230364G03Rik (-207104)
chr10	17723170	17723318	Merged-chr10-17723244-1	Cited2 (+16)
chr10	17827528	17827676	Merged-chr10-17827602-2	Txlnb (+31346), Heca (+120465)
chr10	20153767	20153915	Merged-chr10-20153841-1	Map7 (+4921), 4933406P04Rik (+158453)
chr10	21102081	21102229	Merged-chr10-21102155-2	Myb (+58829), Ahi1 (+149608)
chr10	22196599	22196747	Merged-chr10-22196673-2	H60b (-76673), Raet1c (+38104)
chr10	24834716	24834864	Merged-chr10-24834790-1	Enpp1 (-122632), Enpp3 (+1405)
chr10	25270256	25270404	Merged-chr10-25270330-1	Arg1 (-342860), Akap7 (+28834)
chr10	25314239	25314387	Merged-chr10-25314313-2	Epb4.1l2 (-45485), Akap7 (-15149)
chr10	25708051	25708199	Merged-chr10-25708125-2	Smlr1 (-171853), Tmem200a (+370927)
chr10	26695292	26695440	Merged-chr10-26695366-1	L3mbtl3 (-321410), Arhgap18 (-77111)
chr10	26759597	26759745	Merged-chr10-26759671-2	L3mbtl3 (-385715), Arhgap18 (-12806)
chr10	28801018	28801166	Merged-chr10-28801092-2	Themis (+132732), 2310057J18Rik (+185211)
chr10	29146881	29147029	Merged-chr10-29146955-1	Gm9996 (-2761)
chr10	30803147	30803295	Merged-chr10-30803221-2	Ncoa7 (-114)
chr10	33196035	33196183	Merged-chr10-33196109-2	Trdn (+112626), Clvs2 (+428660)
chr10	36507186	36507334	Merged-chr10-36507260-1	Hs3st5 (+441)
chr10	36611427	36611575	Merged-chr10-36611501-2	Hdac2 (-363043), Hs3st5 (+104682)
chr10	39107165	39107313	Merged-chr10-39107239-1	Fam229b (+26667), Lama4 (+141724)
chr10	39161775	39161923	Merged-chr10-39161849-2	Wisp3 (+1945), Tube1 (+27826)
chr10	39967639	39967787	Merged-chr10-39967713-1	G630090E17Rik (-7560), BC021785 (+18926)
chr10	40258439	40258587	Merged-chr10-40258513-1	Gtf3c6 (-848)
chr10	40301513	40301661	Merged-chr10-40301587-1	Amd1 (+601)
chr10	40465305	40465453	Merged-chr10-40465379-2	Slc22a16 (-104957), Cdk19 (+116071)
chr10	40465756	40465904	Merged-chr10-40465830-2	Slc22a16 (-104506), Cdk19 (+116522)
chr10	41071892	41072040	Merged-chr10-41071966-1	Gpr6 (+319)
chr10	41404346	41404494	Merged-chr10-41404420-2	Zbtb24 (-45976), Akd1 (+52709)
chr10	41467363	41467511	Merged-chr10-41467437-2	Mical1 (-8877), Zbtb24 (+17041)
chr10	41544596	41544744	Merged-chr10-41544670-2	Cd164 (+25170), Ccdc162 (+164630)
chr10	41552984	41553132	Merged-chr10-41553058-1	Cd164 (+33558), Ccdc162 (+156242)
chr10	41671407	41671555	Merged-chr10-41671481-1	Ccdc162 (+37819), Cd164 (+151981)
chr10	42163668	42163816	Merged-chr10-42163742-2	Armc2 (-145362), Foxo3 (+113010)
chr10	42170203	42170351	Merged-chr10-42170277-1	Armc2 (-151897), Foxo3 (+106475)
chr10	42678976	42679124	Merged-chr10-42679050-1	Ostm1 (+134)
chr10	43527865	43528013	Merged-chr10-43527939-2	Gm9803 (+3837), 1700021F05Rik (+13055)
chr10	43992256	43992404	Merged-chr10-43992330-2	Aim1 (+12516), Rtn4ip1 (+90523)
chr10	44730847	44730995	Merged-chr10-44730921-2	Prep (-336285), Prdm1 (-272234)
chr10	45000157	45000305	Merged-chr10-45000231-2	Prdm1 (-541544), Prep (-66975)
chr10	46689946	46690094	Merged-chr10-46690020-2	NONE
chr10	47466058	47466206	Merged-chr10-47466132-2	NONE
chr10	49417545	49417693	Merged-chr10-49417619-2	Grik2 (+371147)
chr10	50592640	50592788	Merged-chr10-50592714-1	Ascc3 (+45)
chr10	52742832	52742980	Merged-chr10-52742906-2	Pln (-594780), Slc35f1 (+52373)
chr10	58224012	58224160	Merged-chr10-58224086-1	AW822073 (+1620), Smpdl3a (+429712)
chr10	58231830	58231978	Merged-chr10-58231904-1	AW822073 (-6198), Gm4981 (+4756)
chr10	58239476	58239624	Merged-chr10-58239550-1	Gm4981 (-2890)
chr10	58540728	58540876	Merged-chr10-58540802-2	Ccdc138 (+42832), Edar (+134852)
chr10	59289196	59289344	Merged-chr10-59289270-1	P4ha1 (-34026), ENSMUSG00000098188 (+67317)
chr10	59894930	59895078	Merged-chr10-59895004-2	Dnajb12 (+15429), Ddit4 (+56766)
chr10	60305406	60305554	Merged-chr10-60305480-2	4632428N05Rik (-41371), Psap (+27852)
chr10	60791082	60791230	Merged-chr10-60791156-1	Slc29a3 (-38374), Unc5b (+40425)
chr10	60801510	60801658	Merged-chr10-60801584-2	Slc29a3 (-48802), Unc5b (+29997)
chr10	61009240	61009388	Merged-chr10-61009314-2	Unc5b (-177733), Pcbd1 (-80029)
chr10	61146294	61146442	Merged-chr10-61146368-2	Sgpl1 (+1276), Pcbd1 (+57025)
chr10	61366020	61366168	Merged-chr10-61366094-2	Pald1 (+17429), Prf1 (+68258)
chr10	61492161	61492309	Merged-chr10-61492235-1	Npffr1 (-103249), D830039M14Rik (-15298)
chr10	61906544	61906692	Merged-chr10-61906618-2	H2afy2 (-122471), Col13a1 (+72490)
chr10	62010141	62010289	Merged-chr10-62010215-1	Gm5424 (-60800), Col13a1 (-31107)
chr10	62241852	62242000	Merged-chr10-62241926-2	Tspan15 (-10708), Tacr2 (-10512)
chr10	62242407	62242555	Merged-chr10-62242481-2	Tspan15 (-11263), Tacr2 (-9957)
chr10	62404951	62405099	Merged-chr10-62405025-2	Hk1 (-25117), Hkdc1 (+17466)
chr10	63157532	63157680	Merged-chr10-63157606-2	Mypn (+46346), Atoh7 (+57450)
chr10	63555716	63555864	Merged-chr10-63555790-2	Ctnna3 (+98280), Gm10118 (+371644)
chr10	66994523	66994671	Merged-chr10-66994597-2	Reep3 (+102391)
chr10	67002744	67002892	Merged-chr10-67002818-1	Reep3 (+94170)
chr10	67019072	67019220	Merged-chr10-67019146-1	Reep3 (+77842)
chr10	67079113	67079261	Merged-chr10-67079187-2	Reep3 (+17801)
chr10	67549306	67549454	Merged-chr10-67549380-1	Ado (-425)
chr10	67979689	67979837	Merged-chr10-67979763-2	Rtkn2 (+165)
chr10	68252749	68252897	Merged-chr10-68252823-2	Arid5b (+25903), Rtkn2 (+273225)
chr10	69817103	69817251	Merged-chr10-69817177-2	Ccdc6 (-279944), Ank3 (+283405)
chr10	70060157	70060305	Merged-chr10-70060231-2	Ccdc6 (-36890), Ank3 (+526459)
chr10	70245266	70245414	Merged-chr10-70245340-1	Slc16a9 (+240)
chr10	70520133	70520281	Merged-chr10-70520207-1	Phyhipl (+79084), Fam13c (+79281)
chr10	72588686	72588834	Merged-chr10-72588760-2	Zwint (-66135)
chr10	74920852	74921000	Merged-chr10-74920926-2	Gnaz (-46251)
chr10	75559985	75560133	Merged-chr10-75560059-2	Fam211b (+271)
chr10	75936197	75936345	Merged-chr10-75936271-1	Mmp11 (-3769), Chchd10 (+698)
chr10	76067839	76067987	Merged-chr10-76067913-2	Zfp280b (+35259), Slc5a4b (+43048)
chr10	76442453	76442601	Merged-chr10-76442527-1	Pcnt (+385)
chr10	77130165	77130313	Merged-chr10-77130239-2	Pofut2 (-129061), Col18a1 (-16534)
chr10	77197520	77197668	Merged-chr10-77197594-2	Col18a1 (-83889), Pofut2 (-61706)
chr10	77690523	77690671	Merged-chr10-77690597-1	Gm19402 (+160)
chr10	77798945	77799093	Merged-chr10-77799019-2	Gm19668 (+114)
chr10	77814716	77814864	Merged-chr10-77814790-2	Gm9507 (-2947), Gm2696 (+108)
chr10	77836048	77836196	Merged-chr10-77836122-2	Gm10318 (-16740), Tspear (+6655)
chr10	77847630	77847778	Merged-chr10-77847704-1	Gm10318 (-5158), Tspear (+18237)
chr10	78009873	78010021	Merged-chr10-78009947-1	Pfkl (-140)
chr10	78091187	78091335	Merged-chr10-78091261-2	Icosl (+21901), D10Jhu81e (+78507)
chr10	78244723	78244871	Merged-chr10-78244797-2	Trappc10 (-155)
chr10	79681748	79681896	Merged-chr10-79681822-2	Cdc34 (-373)
chr10	79754973	79755121	Merged-chr10-79755047-2	Fgf22 (-72)
chr10	79793483	79793631	Merged-chr10-79793557-1	Prss57 (-2596), Palm (-15)
chr10	79841360	79841508	Merged-chr10-79841434-1	Ptbp1 (-12993), 9130017N09Rik (+20413)
chr10	79921103	79921251	Merged-chr10-79921177-1	R3hdm4 (-4247), Kiss1r (+4206)
chr10	80161716	80161864	Merged-chr10-80161790-1	Cirbp (-5988), Midn (+13518)
chr10	80296232	80296380	Merged-chr10-80296306-2	Apc2 (-5514), Rps15 (+3853)
chr10	80387207	80387355	Merged-chr10-80387281-2	Mex3d (+370)
chr10	80399025	80399173	Merged-chr10-80399099-1	Mbd3 (+451)
chr10	80399842	80399990	Merged-chr10-80399916-1	Mbd3 (-366)
chr10	80566441	80566589	Merged-chr10-80566515-1	Rexo1 (-4955)
chr10	80578536	80578684	Merged-chr10-80578610-2	Klf16 (-1289)
chr10	81037151	81037299	Merged-chr10-81037225-2	Slc39a3 (+201)
chr10	81242126	81242274	Merged-chr10-81242200-1	Matk (-15099), Zfr2 (+9045)
chr10	81285762	81285910	Merged-chr10-81285836-2	Tjp3 (+5431), Apba3 (+17664)
chr10	81341689	81341837	Merged-chr10-81341763-2	Gipc3 (+1503), Tbxa2r (+13031)
chr10	81366382	81366530	Merged-chr10-81366456-2	4930404N11Rik (-640)
chr10	81417045	81417193	Merged-chr10-81417119-2	Nfic (+10054), 2210404O07Rik (+24068)
chr10	81433045	81433193	Merged-chr10-81433119-2	Nfic (-5946), Celf5 (+49590)
chr10	81526843	81526991	Merged-chr10-81526917-2	Gna15 (-2692)
chr10	81544776	81544924	Merged-chr10-81544850-1	Gna11 (+340)
chr10	81559361	81559509	Merged-chr10-81559435-2	Aes (-59)
chr10	81564919	81565067	Merged-chr10-81564993-1	Tle2 (-10539), Aes (+5499)
chr10	81643763	81643911	Merged-chr10-81643837-1	Gm10778 (-18161), Ankrd24 (+15202)
chr10	82622863	82623011	Merged-chr10-82622937-2	1190007I07Rik (+259)
chr10	83056365	83056513	Merged-chr10-83056439-1	Chst11 (+70941), Slc41a2 (+281443)
chr10	83346156	83346304	Merged-chr10-83346230-2	D10Wsu102e (-13991), Slc41a2 (-8348)
chr10	84383264	84383412	Merged-chr10-84383338-2	Nuak1 (+57259), 1500009L16Rik (+660473)
chr10	84754871	84755019	Merged-chr10-84754945-1	Rfx4 (-1117)
chr10	85013532	85013680	Merged-chr10-85013606-2	Fhl4 (+88889), Ric8b (+95990)
chr10	85035348	85035496	Merged-chr10-85035422-2	Fhl4 (+67073), Ric8b (+117806)
chr10	85215591	85215739	Merged-chr10-85215665-1	Gm8394 (-97823), Cry1 (-30611)
chr10	85328076	85328224	Merged-chr10-85328150-2	Btbd11 (-58664), Gm8394 (+14662)
chr10	85526695	85526843	Merged-chr10-85526769-2	Pwp1 (-345062), Btbd11 (+139955)
chr10	85539516	85539664	Merged-chr10-85539590-2	Pwp1 (-332241), Btbd11 (+152776)
chr10	85539937	85540085	Merged-chr10-85540011-1	Pwp1 (-331820), Btbd11 (+153197)
chr10	86972143	86972291	Merged-chr10-86972217-2	Stab2 (+35808), Nt5dc3 (+193212)
chr10	88708904	88709052	Merged-chr10-88708978-1	Spic (-25955), Arl1 (-22090)
chr10	89443551	89443699	Merged-chr10-89443625-2	Gas2l3 (+342)
chr10	90019378	90019526	Merged-chr10-90019452-1	Anks1b (+145943)
chr10	90904237	90904385	Merged-chr10-90904311-2	Apaf1 (+178459)
chr10	91070449	91070597	Merged-chr10-91070523-1	Apaf1 (+12247)
chr10	91123587	91123735	Merged-chr10-91123661-2	Slc25a3 (+398)
chr10	91429317	91429465	Merged-chr10-91429391-2	Tmpo (-257809)
chr10	94426471	94426619	Merged-chr10-94426545-1	Tmcc3 (-88312), Ndufa12 (+227541)
chr10	94514905	94515053	Merged-chr10-94514979-1	Tmcc3 (+122)
chr10	95271051	95271199	Merged-chr10-95271125-2	Plxnc1 (-326547), Cradd (+52972)
chr10	95719553	95719701	Merged-chr10-95719627-2	4732465J04Rik (-72944), Anapc15-ps (-46176)
chr10	96309153	96309301	Merged-chr10-96309227-1	Gm20091 (+99811), Gm5426 (+172624)
chr10	99132305	99132453	Merged-chr10-99132379-2	Dusp6 (-130852), Phxr2 (-6058)
chr10	105841225	105841373	Merged-chr10-105841299-1	Mettl25 (+79), Ccdc59 (+232)
chr10	108162386	108162534	Merged-chr10-108162460-1	Ppp1r12a (+60)
chr10	108353059	108353207	Merged-chr10-108353133-1	Pawr (+20944), Syt1 (+657842)
chr10	110744926	110745074	Merged-chr10-110745000-2	E2f7 (-468)
chr10	110854786	110854934	Merged-chr10-110854860-2	Csrp2 (-65317), E2f7 (+109392)
chr10	110856118	110856266	Merged-chr10-110856192-2	Csrp2 (-63985), E2f7 (+110724)
chr10	111164570	111164718	Merged-chr10-111164644-2	Osbpl8 (-158)
chr10	111190718	111190866	Merged-chr10-111190792-2	Bbs10 (-107887), Osbpl8 (+25990)
chr10	111191161	111191309	Merged-chr10-111191235-2	Bbs10 (-107444), Osbpl8 (+26433)
chr10	111433620	111433768	Merged-chr10-111433694-1	Nap1l1 (-46923), Bbs10 (+135015)
chr10	115184903	115185051	Merged-chr10-115184977-1	Tph2 (+45)
chr10	117376937	117377085	Merged-chr10-117377011-2	Cpsf6 (-41)
chr10	117688295	117688443	Merged-chr10-117688369-1	Mdm2 (+22389), Cpm (+58869)
chr10	117845737	117845885	Merged-chr10-117845811-1	Rap1b (+124)
chr10	118121990	118122138	Merged-chr10-118122064-2	Rap1b (-276129), Mdm1 (-19723)
chr10	120171569	120171717	Merged-chr10-120171643-1	Helb (-58656), Irak3 (+30016)
chr10	120978534	120978682	Merged-chr10-120978608-2	Lemd3 (+724)
chr10	121350843	121350991	Merged-chr10-121350917-2	Tbc1d30 (-39728), Gns (-14173)
chr10	121364822	121364970	Merged-chr10-121364896-1	Gns (-194)
chr10	121476157	121476305	Merged-chr10-121476231-1	Rassf3 (+19)
chr10	121510289	121510437	Merged-chr10-121510363-2	Rassf3 (-34113), Tbk1 (+76431)
chr10	121641749	121641897	Merged-chr10-121641823-2	D930020B18Rik (+29)
chr10	122033398	122033546	Merged-chr10-122033472-2	Srgap1 (+13843), BC048403 (+293535)
chr10	122300237	122300385	Merged-chr10-122300311-2	Tmem5 (-202940), Avpr1a (-148188)
chr10	123032263	123032411	Merged-chr10-123032337-2	Mon2 (+44168), Ppm1h (+353555)
chr10	123076497	123076645	Merged-chr10-123076571-2	Mon2 (-66)
chr10	125906579	125906727	Merged-chr10-125906653-2	Slc16a7 (-577690), Lrig3 (-59566)
chr10	127054855	127055003	Merged-chr10-127054929-2	March9 (+5255), Cyp27b1 (+6679)
chr10	127066066	127066214	Merged-chr10-127066140-1	Cdk4 (+2606), Tspan31 (+4121)
chr10	127090909	127091057	Merged-chr10-127090983-1	Agap2 (+12076), Os9 (+30177)
chr10	127276383	127276531	Merged-chr10-127276457-2	Dctn2 (+10195), Mbd6 (+12433)
chr10	127657965	127658113	Merged-chr10-127658039-2	Nab2 (+8671), Stat6 (+15053)
chr10	128035452	128035600	Merged-chr10-128035526-2	Naca (+180)
chr10	128149608	128149756	Merged-chr10-128149682-2	Rbms2 (+26886), Baz2a (+56899)
chr10	128498687	128498835	Merged-chr10-128498761-1	Myl6 (-4886), Myl6b (-76)
chr10	128525766	128525914	Merged-chr10-128525840-2	Esyt1 (+19)
chr10	128705126	128705274	Merged-chr10-128705200-2	Pmel (-1058), Cdk2 (-149)
chr10	128891311	128891459	Merged-chr10-128891385-2	Gdf11 (+333)
chr10	128909705	128909853	Merged-chr10-128909779-1	Cd63 (+860)
chr10	130259527	130259675	Merged-chr10-130259601-2	Olfr827 (-48452), Neurod4 (+20639)
chr11	3120288	3120436	Merged-chr11-3120362-2	Sfi1 (+73045)
chr11	3266156	3266304	Merged-chr11-3266230-2	Drg1 (+163)
chr11	3290207	3290355	Merged-chr11-3290281-1	Patz1 (-158)
chr11	3409112	3409260	Merged-chr11-3409186-1	Limk2 (-12)
chr11	3451747	3451895	Merged-chr11-3451821-1	Rnf185 (+542)
chr11	3932041	3932189	Merged-chr11-3932115-2	Tcn2 (+44)
chr11	4146465	4146613	Merged-chr11-4146539-2	Rnf215 (+11337), Ccdc157 (+13752)
chr11	4147182	4147330	Merged-chr11-4147256-2	Rnf215 (+12054), Ccdc157 (+13035)
chr11	4163431	4163579	Merged-chr11-4163505-1	Ccdc157 (-3214), Sf3a1 (+3155)
chr11	4940418	4940566	Merged-chr11-4940492-2	Nefh (+7572), Thoc5 (+45149)
chr11	4947366	4947514	Merged-chr11-4947440-2	Nefh (+624)
chr11	5130452	5130600	Merged-chr11-5130526-2	Ewsr1 (-31260), Emid1 (+21731)
chr11	5182067	5182215	Merged-chr11-5182141-2	Emid1 (-29884), Kremen1 (+79417)
chr11	5242249	5242397	Merged-chr11-5242323-2	Emid1 (-90066), Kremen1 (+19235)
chr11	5499432	5499580	Merged-chr11-5499506-2	Znrf3 (-54659), Xbp1 (-21153)
chr11	5741284	5741432	Merged-chr11-5741358-2	Urgcp (-208)
chr11	5840406	5840554	Merged-chr11-5840480-2	Polm (-2464)
chr11	5855590	5855738	Merged-chr11-5855664-2	Polm (-17648), Aebp1 (-6283)
chr11	6154265	6154413	Merged-chr11-6154339-1	Camk2b (-88591), Nudcd3 (+46076)
chr11	6181096	6181244	Merged-chr11-6181170-2	Camk2b (-115422), Nudcd3 (+19245)
chr11	6274689	6274837	Merged-chr11-6274763-1	Tmed4 (+107)
chr11	6389481	6389629	Merged-chr11-6389555-2	Zmiz2 (+84)
chr11	6444693	6444841	Merged-chr11-6444767-1	H2afv (-324)
chr11	6895184	6895332	Merged-chr11-6895258-1	Adcy1 (-168231), Ramp3 (+236737)
chr11	8572913	8573061	Merged-chr11-8572987-2	Tns3 (+91548)
chr11	9011112	9011260	Merged-chr11-9011186-2	Hus1 (+5)
chr11	9051991	9052139	Merged-chr11-9052065-2	Sun3 (-3074)
chr11	9116402	9116550	Merged-chr11-9116476-1	Upp1 (-1627)
chr11	9983066	9983214	Merged-chr11-9983140-2	Abca13 (+791198)
chr11	11113952	11114100	Merged-chr11-11114026-1	Vwc2 (-197)
chr11	13417962	13418110	Merged-chr11-13418036-2	Cobl (-953079)
chr11	16591595	16591743	Merged-chr11-16591669-2	Egfr (-160542), Sec61g (-83185)
chr11	19829756	19829904	Merged-chr11-19829830-2	Meis1 (-811116), Spred2 (-94612)
chr11	19836185	19836333	Merged-chr11-19836259-2	Meis1 (-817545), Spred2 (-88183)
chr11	19851387	19851535	Merged-chr11-19851461-2	Meis1 (-832747), Spred2 (-72981)
chr11	20113101	20113249	Merged-chr11-20113175-2	Actr2 (-262)
chr11	20145499	20145647	Merged-chr11-20145573-2	Rab1 (-56029), Actr2 (-32660)
chr11	20231193	20231341	Merged-chr11-20231267-2	Cep68 (+18151), Rab1 (+29665)
chr11	20772847	20772995	Merged-chr11-20772921-2	Aftph (-31332), Lgalsl (+58135)
chr11	22372888	22373036	Merged-chr11-22372962-2	Tmem17 (-139126), Ehbp1 (-86167)
chr11	22610464	22610612	Merged-chr11-22610538-2	Tmem17 (+98450), B3gnt2 (+249563)
chr11	26372073	26372221	Merged-chr11-26372147-2	5730522E02Rik (-161581), Fancl (-13988)
chr11	28171385	28171533	Merged-chr11-28171459-2	Gm6685 (+168408)
chr11	28583259	28583407	Merged-chr11-28583333-2	Ccdc85a (+963)
chr11	29692966	29693114	Merged-chr11-29693040-2	Rtn4 (+93)
chr11	29774378	29774526	Merged-chr11-29774452-2	4931440F15Rik (+51216), Rtn4 (+81505)
chr11	30771839	30771987	Merged-chr11-30771913-2	Psme4 (+187)
chr11	31396755	31396903	Merged-chr11-31396829-2	Stc2 (-26755), Bod1 (+275056)
chr11	31398770	31398918	Merged-chr11-31398844-2	Stc2 (-28770), Bod1 (+273041)
chr11	32000307	32000455	Merged-chr11-32000381-2	Nsg2 (-82)
chr11	32619350	32619498	Merged-chr11-32619424-1	Fbxw11 (-23451), Stk10 (+86119)
chr11	32718570	32718718	Merged-chr11-32718644-2	Fbxw11 (+75769), 1700008A04Rik (+105961)
chr11	35086190	35086338	Merged-chr11-35086264-2	Spdl1 (-252623), Slit3 (-34960)
chr11	35610207	35610355	Merged-chr11-35610281-2	Pank3 (-159203), Slit3 (+489057)
chr11	36220751	36220899	Merged-chr11-36220825-2	Wwc1 (-240298)
chr11	36221316	36221464	Merged-chr11-36221390-1	Wwc1 (-240863)
chr11	40050618	40050766	Merged-chr11-40050692-2	Mat2b (+642082)
chr11	40600231	40600379	Merged-chr11-40600305-2	Mat2b (+92469)
chr11	43653173	43653321	Merged-chr11-43653247-1	Fabp6 (-51707), Pwwp2a (-28751)
chr11	46041277	46041425	Merged-chr11-46041351-2	Gm12166 (+10960), Sox30 (+61041)
chr11	46230424	46230572	Merged-chr11-46230498-2	Nipal4 (-63990), Fndc9 (-5033)
chr11	46375287	46375435	Merged-chr11-46375361-2	Cyfip2 (-63003), Itk (+14154)
chr11	47640828	47640976	Merged-chr11-47640902-2	Sgcd (-261380)
chr11	49588724	49588872	Merged-chr11-49588798-2	Flt4 (-20465), Olfr1380 (+24875)
chr11	49589059	49589207	Merged-chr11-49589133-2	Flt4 (-20130), Olfr1380 (+25210)
chr11	49728034	49728182	Merged-chr11-49728108-2	Gfpt2 (-66079), Cnot6 (-15398)
chr11	50174822	50174970	Merged-chr11-50174896-1	3010026O09Rik (+47)
chr11	50430858	50431006	Merged-chr11-50430932-2	Rufy1 (+193)
chr11	50601997	50602145	Merged-chr11-50602071-2	Adamts2 (-13)
chr11	51176129	51176277	Merged-chr11-51176203-2	BC049762 (+86748), 9230009I02Rik (+91116)
chr11	51606477	51606625	Merged-chr11-51606551-1	Hnrnpab (+296)
chr11	51936164	51936312	Merged-chr11-51936238-1	Phf15 (-78585), Cdkn2aipnl (-31423)
chr11	51967776	51967924	Merged-chr11-51967850-1	Cdkn2aipnl (+189)
chr11	52188589	52188737	Merged-chr11-52188663-2	Olfr1373 (-43135), Olfr1371 (+25324)
chr11	52368281	52368429	Merged-chr11-52368355-1	9530068E07Rik (-28073), Vdac1 (+7495)
chr11	52479608	52479756	Merged-chr11-52479682-2	Fstl4 (-284952), 9530068E07Rik (+83254)
chr11	53480058	53480206	Merged-chr11-53480132-2	Gm9945 (-34), Sowaha (+63)
chr11	53707372	53707520	Merged-chr11-53707446-1	Rad50 (-127)
chr11	53760015	53760163	Merged-chr11-53760089-1	Irf1 (-9925), Il5 (+39295)
chr11	53769801	53769949	Merged-chr11-53769875-2	Irf1 (-139)
chr11	54162937	54163085	Merged-chr11-54163011-1	P4ha2 (+62048), Csf2 (+86656)
chr11	55264426	55264574	Merged-chr11-55264500-2	Slc36a1 (+60150), Fat2 (+72064)
chr11	55810849	55810997	Merged-chr11-55810923-1	Glra1 (-202725), Nmur2 (+230087)
chr11	57912055	57912203	Merged-chr11-57912129-2	Larp1 (-96935), Hand1 (-79982)
chr11	58009363	58009511	Merged-chr11-58009437-2	Larp1 (+373)
chr11	58938876	58939024	Merged-chr11-58938950-1	Rnf187 (-34)
chr11	58982029	58982177	Merged-chr11-58982103-2	Trim11 (+3987), Obscn (+154272)
chr11	59640337	59640485	Merged-chr11-59640411-2	Mprip (-22084), Olfr225 (+27445)
chr11	59948189	59948337	Merged-chr11-59948263-1	Med9 (+57)
chr11	60161412	60161560	Merged-chr11-60161486-2	Rai1 (+56473), Srebf1 (+59118)
chr11	60248656	60248804	Merged-chr11-60248730-1	Srebf1 (-28126), Tom1l2 (+104175)
chr11	60722766	60722914	Merged-chr11-60722840-2	Flii (+4423), Llgl1 (+23117)
chr11	60941521	60941669	Merged-chr11-60941595-1	Kcnj12 (-124209), Map2k3 (+9562)
chr11	61081667	61081815	Merged-chr11-61081741-1	Tnfrsf13b (-45014), Kcnj12 (+15937)
chr11	61410219	61410367	Merged-chr11-61410293-2	Slc47a1 (-32212), Rnf112 (+43712)
chr11	61930103	61930251	Merged-chr11-61930177-1	Akap10 (+75)
chr11	62511887	62512035	Merged-chr11-62511961-2	Cenpv (+27300), Pigl (+53501)
chr11	62538883	62539031	Merged-chr11-62538957-1	Cenpv (+304)
chr11	62648068	62648216	Merged-chr11-62648142-2	Mmgt2 (-1307), Fam211a (+381)
chr11	62873450	62873598	Merged-chr11-62873524-1	Tvp23b (-5931), Fbxw10 (+26401)
chr11	63533634	63533782	Merged-chr11-63533708-2	Hs3st3b1 (+388582), Pmp22 (+404726)
chr11	63919413	63919561	Merged-chr11-63919487-1	Hs3st3b1 (+2803), Pmp22 (+790505)
chr11	63921440	63921588	Merged-chr11-63921514-2	Hs3st3b1 (+776)
chr11	63926972	63927120	Merged-chr11-63927046-2	Hs3st3b1 (-4756)
chr11	64089821	64089969	Merged-chr11-64089895-2	Hs3st3a1 (-345437), Cox10 (-10429)
chr11	65162351	65162499	Merged-chr11-65162425-1	1700086D15Rik (-2535), Arhgap44 (+536)
chr11	65713026	65713174	Merged-chr11-65713100-1	Myocd (-443111), Map2k4 (+75197)
chr11	66906226	66906374	Merged-chr11-66906300-2	Shisa6 (-380336), Pirt (-5681)
chr11	67011778	67011926	Merged-chr11-67011852-2	Tmem220 (-13302), Pirt (+99871)
chr11	67017868	67018016	Merged-chr11-67017942-2	Tmem220 (-7212), Pirt (+105961)
chr11	67094833	67094981	Merged-chr11-67094907-1	Myh2 (-76120), Myh3 (+16607)
chr11	67921563	67921711	Merged-chr11-67921637-2	Usp43 (+516)
chr11	67966400	67966548	Merged-chr11-67966474-1	Wdr16 (-832), Stx8 (+281)
chr11	68555938	68556086	Merged-chr11-68556012-2	Mfsd6l (-174)
chr11	68691338	68691486	Merged-chr11-68691412-2	Myh10 (-503)
chr11	69073459	69073607	Merged-chr11-69073533-1	Vamp2 (-14957), Tmem107 (+2722)
chr11	69340590	69340738	Merged-chr11-69340664-1	Kcnab3 (+14406), Chd3 (+28742)
chr11	69362133	69362281	Merged-chr11-69362207-2	Chd3 (+7199), Kcnab3 (+35949)
chr11	69459922	69460070	Merged-chr11-69459996-2	Kdm6b (-46321), Dnahc2 (+89112)
chr11	69564372	69564520	Merged-chr11-69564446-1	Efnb3 (-4241)
chr11	69633181	69633329	Merged-chr11-69633255-2	Fxr2 (+265)
chr11	69654994	69655142	Merged-chr11-69655068-1	Sox15 (-246)
chr11	69800204	69800352	Merged-chr11-69800278-2	Chrnb1 (-4335)
chr11	69803984	69804132	Merged-chr11-69804058-1	Fgf11 (-2201)
chr11	69887958	69888106	Merged-chr11-69888032-1	Kctd11 (-7047), Acap1 (+7507)
chr11	70539987	70540135	Merged-chr11-70540061-2	Pld2 (-245)
chr11	70687669	70687817	Merged-chr11-70687743-2	Camta2 (+210)
chr11	70724460	70724608	Merged-chr11-70724534-2	Zfp3 (-39675), Kif1c (+23986)
chr11	70737843	70737991	Merged-chr11-70737917-2	Zfp3 (-26292), Kif1c (+37369)
chr11	70764467	70764615	Merged-chr11-70764541-1	Zfp3 (+332)
chr11	71389667	71389815	Merged-chr11-71389741-1	Wscd1 (-361635), Nlrp1b (-188285)
chr11	71513041	71513189	Merged-chr11-71513115-2	Nlrp1b (-311659), Wscd1 (-238261)
chr11	72342718	72342866	Merged-chr11-72342792-1	Tekt1 (+19650), Fbxo39 (+28348)
chr11	72607561	72607709	Merged-chr11-72607635-1	Ube2g1 (+352)
chr11	74629981	74630129	Merged-chr11-74630055-1	Cluh (-19460), E130309D14Rik (+10450)
chr11	74723880	74724028	Merged-chr11-74723954-2	Pafah1b1 (+716)
chr11	74876816	74876964	Merged-chr11-74876890-1	Sgsm2 (+20170), Mnt (+45970)
chr11	74896925	74897073	Merged-chr11-74896999-1	Tsr1 (-1079), Sgsm2 (+61)
chr11	74925831	74925979	Merged-chr11-74925905-1	Srr (-107), Smg6 (+82)
chr11	74981637	74981785	Merged-chr11-74981711-2	Smg6 (+55888), Hic1 (+187808)
chr11	75165506	75165654	Merged-chr11-75165580-2	Hic1 (+3939), Smg6 (+239757)
chr11	75206443	75206591	Merged-chr11-75206517-2	Rtn4rl1 (+12734), Rpa1 (+141793)
chr11	75400241	75400389	Merged-chr11-75400315-1	Serpinf1 (+22386), Smyd4 (+51882)
chr11	75510343	75510491	Merged-chr11-75510417-2	Scarf1 (-3123), Rilp (+323)
chr11	75572320	75572468	Merged-chr11-75572394-2	Pitpna (-15703), Slc43a2 (+40282)
chr11	75732941	75733089	Merged-chr11-75733015-1	Ywhae (+146)
chr11	76287399	76287547	Merged-chr11-76287473-2	Glod4 (-43748), Nxn (+111667)
chr11	76294970	76295118	Merged-chr11-76295044-2	Glod4 (-51319), Nxn (+104096)
chr11	76328945	76329093	Merged-chr11-76329019-2	Glod4 (-85294), Nxn (+70121)
chr11	77100377	77100525	Merged-chr11-77100451-1	Ccdc55 (-22016), Efcab5 (+88517)
chr11	77488780	77488928	Merged-chr11-77488854-1	Git1 (-4708), Ankrd13b (+824)
chr11	77500709	77500857	Merged-chr11-77500783-2	Git1 (+7221), Trp53i13 (+12587)
chr11	77763812	77763960	Merged-chr11-77763886-1	Cryba1 (-38603), Myo18a (-8265)
chr11	77766558	77766706	Merged-chr11-77766632-2	Cryba1 (-41349), Myo18a (-5519)
chr11	77980384	77980532	Merged-chr11-77980458-2	Phf12 (-2344)
chr11	78411365	78411513	Merged-chr11-78411439-2	Foxn1 (-24881), Slc13a2 (+10778)
chr11	78695977	78696125	Merged-chr11-78696051-2	Tmem97 (-145274), Nlk (+1322)
chr11	78751473	78751621	Merged-chr11-78751547-2	Fam58b (+182)
chr11	79002740	79002888	Merged-chr11-79002814-2	Lgals9 (-17890), Ksr1 (+143593)
chr11	79128331	79128479	Merged-chr11-79128405-1	Lgals9 (-143481), Ksr1 (+18002)
chr11	79593647	79593795	Merged-chr11-79593721-2	Rab11fip4 (+2509), Utp6 (+368669)
chr11	79646476	79646624	Merged-chr11-79646550-2	Rab11fip4 (+55338), Utp6 (+315840)
chr11	80290232	80290380	Merged-chr11-80290306-2	Rhbdl3 (-10606), Rhot1 (+81251)
chr11	80508877	80509025	Merged-chr11-80508951-2	Cdk5r1 (+31905), Myo1d (+271074)
chr11	81152387	81152535	Merged-chr11-81152461-1	Asic2 (+860)
chr11	82882772	82882920	Merged-chr11-82882846-2	Rffl (-11636), Rad51d (+7768)
chr11	82902037	82902185	Merged-chr11-82902111-2	Nle1 (+6300), Fndc8 (+9987)
chr11	83776358	83776506	Merged-chr11-83776432-2	Hnf1b (-74423), Heatr6 (+22736)
chr11	83964392	83964540	Merged-chr11-83964466-2	Synrg (+38)
chr11	84332944	84333092	Merged-chr11-84333018-1	Acaca (+159896), Aatf (+180504)
chr11	84570576	84570724	Merged-chr11-84570650-1	Lhx1 (-44635), Mrm1 (+248865)
chr11	84662040	84662188	Merged-chr11-84662114-1	Lhx1 (-136099), Mrm1 (+157401)
chr11	84869991	84870139	Merged-chr11-84870065-1	Ggnbp2 (+724)
chr11	84870418	84870566	Merged-chr11-84870492-1	Ggnbp2 (+297)
chr11	85334988	85335136	Merged-chr11-85335062-1	Bcas3 (-18150), Ppm1d (+23818)
chr11	85658538	85658686	Merged-chr11-85658612-2	Tbx2 (-173939), Bcas3 (+305400)
chr11	85969480	85969628	Merged-chr11-85969554-2	Tbx4 (+83132), Brip1 (+231639)
chr11	87074004	87074152	Merged-chr11-87074078-1	Gdpd1 (-16)
chr11	87426797	87426945	Merged-chr11-87426871-1	Gm11492 (-139782), Tex14 (+21806)
chr11	87443372	87443520	Merged-chr11-87443446-1	Gm11492 (-123207), Tex14 (+38381)
chr11	87462453	87462601	Merged-chr11-87462527-1	Gm11492 (-104126), Tex14 (+57462)
chr11	87592138	87592286	Merged-chr11-87592212-1	Mtmr4 (+50)
chr11	87853149	87853297	Merged-chr11-87853223-2	Mks1 (+8)
chr11	87966322	87966470	Merged-chr11-87966396-1	Olfr464 (-51393), Dynll2 (+21137)
chr11	88067861	88068009	Merged-chr11-88067935-2	Vezf1 (-344)
chr11	88139669	88139817	Merged-chr11-88139743-1	Mrps23 (-64645), Cuedc1 (+40597)
chr11	88162152	88162300	Merged-chr11-88162226-2	Mrps23 (-42162), Cuedc1 (+63080)
chr11	88381260	88381408	Merged-chr11-88381334-2	1700106J16Rik (+87291), Msi2 (+336767)
chr11	88404446	88404594	Merged-chr11-88404520-2	1700106J16Rik (+110477), Msi2 (+313581)
chr11	88689836	88689984	Merged-chr11-88689910-2	Msi2 (+28191), 1700106J16Rik (+395867)
chr11	88974050	88974198	Merged-chr11-88974124-1	Coil (+189)
chr11	88993894	88994042	Merged-chr11-88993968-2	Trim25 (-5408), Coil (+20033)
chr11	93968210	93968358	Merged-chr11-93968284-2	Gm20390 (+9), Nme1 (+237)
chr11	94163110	94163258	Merged-chr11-94163184-2	Tob1 (-48270), Spag9 (+167081)
chr11	94211400	94211548	Merged-chr11-94211474-2	Tob1 (+20)
chr11	94989776	94989924	Merged-chr11-94989850-2	Ppp1r9b (-1185)
chr11	95057007	95057155	Merged-chr11-95057081-2	Pdk2 (-15727), Itga3 (+19633)
chr11	95126590	95126738	Merged-chr11-95126664-1	Dlx3 (+6575), Dlx4 (+19599)
chr11	95305689	95305837	Merged-chr11-95305763-2	Kat7 (+4483), Tac4 (+44234)
chr11	95337095	95337243	Merged-chr11-95337169-1	Fam117a (+151)
chr11	95514313	95514461	Merged-chr11-95514387-2	Nxph3 (+183)
chr11	95805639	95805787	Merged-chr11-95805713-2	Phospho1 (-18787), B130006D01Rik (+82126)
chr11	95963480	95963628	Merged-chr11-95963554-1	B4galnt2 (-48663), Igf2bp1 (+42386)
chr11	95991038	95991186	Merged-chr11-95991112-2	B4galnt2 (-76221), Igf2bp1 (+14828)
chr11	96786193	96786341	Merged-chr11-96786267-2	Cbx1 (-2892)
chr11	96929261	96929409	Merged-chr11-96929335-2	Prr15l (+11)
chr11	96956202	96956350	Merged-chr11-96956276-1	Pnpo (-12290), Sp2 (+21412)
chr11	97151579	97151727	Merged-chr11-97151653-2	Tbkbp1 (-1941)
chr11	97280726	97280874	Merged-chr11-97280800-1	Npepps (-162)
chr11	97568794	97568942	Merged-chr11-97568868-1	4933428G20Rik (-68528), Srcin1 (+6347)
chr11	97598434	97598582	Merged-chr11-97598508-1	Srcin1 (-23293), E130012A19Rik (+31208)
chr11	97671241	97671389	Merged-chr11-97671315-2	Cisd3 (-14638), Mllt6 (+7901)
chr11	97808773	97808921	Merged-chr11-97808847-2	B230217C12Rik (-31933), Lasp1 (+9282)
chr11	98026989	98027137	Merged-chr11-98027063-1	Cacnb1 (-4429), Rpl19 (+139)
chr11	98446824	98446972	Merged-chr11-98446898-2	Grb7 (+64)
chr11	98682548	98682696	Merged-chr11-98682622-2	Psmd3 (+68)
chr11	98743755	98743903	Merged-chr11-98743829-2	Thra (+1956), Nr1d1 (+31504)
chr11	98849399	98849547	Merged-chr11-98849473-2	Wipf2 (-14165), Rapgefl1 (+12688)
chr11	98907793	98907941	Merged-chr11-98907867-2	Cdc6 (-284)
chr11	99026154	99026302	Merged-chr11-99026228-2	Top2a (-2039)
chr11	99580706	99580854	Merged-chr11-99580780-1	Krtap1-5 (+236)
chr11	99583319	99583467	Merged-chr11-99583393-2	Krtap1-5 (-2377), Krtap1-4 (+261)
chr11	99591132	99591280	Merged-chr11-99591206-2	Krtap1-3 (+133)
chr11	99597924	99598072	Merged-chr11-99597998-2	Krtap9-3 (+107)
chr11	99602810	99602958	Merged-chr11-99602884-2	Krtap9-3 (-4779), Gm11938 (+424)
chr11	99627870	99628018	Merged-chr11-99627944-2	Krtap4-1 (+295)
chr11	99634782	99634930	Merged-chr11-99634856-2	Krtap4-2 (+228)
chr11	99643780	99643928	Merged-chr11-99643854-2	Krtap4-7 (+235)
chr11	99658642	99658790	Merged-chr11-99658716-2	Gm11563 (+243)
chr11	99665554	99665702	Merged-chr11-99665628-2	Krtap4-6 (+332)
chr11	99785544	99785692	Merged-chr11-99785618-2	Krtap4-8 (-4914), Krtap4-9 (+418)
chr11	99809629	99809777	Merged-chr11-99809703-2	Krtap4-13 (+193)
chr11	99815064	99815212	Merged-chr11-99815138-2	Gm11564 (+528)
chr11	99837421	99837569	Merged-chr11-99837495-2	2300003K06Rik (+571)
chr11	99846835	99846983	Merged-chr11-99846909-2	2300003K06Rik (-8843), Krtap4-16 (+4699)
chr11	99851288	99851436	Merged-chr11-99851362-2	Krtap4-16 (+246)
chr11	99858188	99858336	Merged-chr11-99858262-2	Gm11568 (+345)
chr11	99897550	99897698	Merged-chr11-99897624-2	Krtap31-1 (-10296), Gm11567 (+18437)
chr11	99948808	99948956	Merged-chr11-99948882-2	Krtap9-5 (+407)
chr11	99949244	99949392	Merged-chr11-99949318-2	Krtap9-5 (+843)
chr11	100256381	100256529	Merged-chr11-100256455-2	Krt16 (-7553), Krt17 (+4574)
chr11	100257455	100257603	Merged-chr11-100257529-1	Krt16 (-8627), Krt17 (+3500)
chr11	100472577	100472725	Merged-chr11-100472651-2	Klhl11 (+90)
chr11	100728683	100728831	Merged-chr11-100728757-2	Rab5c (+9458), Hspb9 (+14907)
chr11	100746706	100746854	Merged-chr11-100746780-2	Rab5c (-8565), Kcnh4 (+13162)
chr11	100957287	100957435	Merged-chr11-100957361-2	Stat3 (-17821), Ptrf (+13526)
chr11	101131862	101132010	Merged-chr11-101131936-2	Tubg2 (-23971), Tubg1 (+11998)
chr11	101155710	101155858	Merged-chr11-101155784-1	Tubg2 (-123)
chr11	101497138	101497286	Merged-chr11-101497212-2	Rnd2 (+29037), Brca1 (+54667)
chr11	101590280	101590428	Merged-chr11-101590354-2	Rdm1 (-37588), Tmem106a (+8112)
chr11	101601013	101601161	Merged-chr11-101601087-2	Rdm1 (-26855), Tmem106a (+18845)
chr11	102040287	102040435	Merged-chr11-102040361-1	Cd300lg (-1148)
chr11	102156241	102156389	Merged-chr11-102156315-2	Tmem101 (+89)
chr11	102206600	102206748	Merged-chr11-102206674-1	G6pc3 (+17005), Hdac5 (+23492)
chr11	102209829	102209977	Merged-chr11-102209903-2	G6pc3 (+20234), Hdac5 (+20263)
chr11	102317600	102317748	Merged-chr11-102317674-1	Atxn7l3 (-21045), Ubtf (+1422)
chr11	102394488	102394636	Merged-chr11-102394562-2	Slc4a1 (-29282), Slc25a39 (+12982)
chr11	102407672	102407820	Merged-chr11-102407746-1	Slc25a39 (-202)
chr11	102624184	102624332	Merged-chr11-102624258-1	Gm1564 (-41330), Fzd2 (+19827)
chr11	102957023	102957171	Merged-chr11-102957097-2	C1ql1 (-10409), Dcakd (+60071)
chr11	103138749	103138897	Merged-chr11-103138823-1	Fmnl1 (-32284), Hexim2 (+5478)
chr11	103941378	103941526	Merged-chr11-103941452-1	Nsf (+12604), Wnt3 (+167302)
chr11	106020456	106020604	Merged-chr11-106020530-2	Dcaf7 (-16342), Kcnh6 (+12357)
chr11	106491489	106491637	Merged-chr11-106491563-2	Ern1 (-3767)
chr11	106606118	106606266	Merged-chr11-106606192-1	Ern1 (-118396), Tex2 (+6738)
chr11	106674668	106674816	Merged-chr11-106674742-2	Tex2 (-61812), Pecam1 (+40517)
chr11	106788382	106788530	Merged-chr11-106788456-1	Cep95 (-819), Ddx5 (+76)
chr11	107135821	107135969	Merged-chr11-107135895-2	Bptf (-3973)
chr11	107817277	107817425	Merged-chr11-107817351-1	Cacng4 (-22794), Cacng5 (+97704)
chr11	108101674	108101822	Merged-chr11-108101748-2	Cacng5 (-186693), Prkca (+242180)
chr11	108119854	108120002	Merged-chr11-108119928-2	Cacng5 (-204873), Prkca (+224000)
chr11	108916211	108916359	Merged-chr11-108916285-1	Axin2 (-4064)
chr11	114502791	114502939	Merged-chr11-114502865-1	Sdk2 (-436647), Rpl38 (-165744)
chr11	114560050	114560198	Merged-chr11-114560124-2	Sdk2 (-493906), Rpl38 (-108485)
chr11	114650731	114650879	Merged-chr11-114650805-2	Sdk2 (-584587), Rpl38 (-17804)
chr11	114781112	114781260	Merged-chr11-114781186-1	Btbd17 (+14711), Kif19a (+15797)
chr11	114795325	114795473	Merged-chr11-114795399-2	Gpr142 (-3525), Btbd17 (+498)
chr11	115187456	115187604	Merged-chr11-115187530-1	Nat9 (-140), Tmem104 (+43)
chr11	115258239	115258387	Merged-chr11-115258313-2	Grin2c (+8930), Tmem104 (+70826)
chr11	115357559	115357707	Merged-chr11-115357633-2	Hid1 (+10123), Otop3 (+22899)
chr11	115441571	115441719	Merged-chr11-115441645-2	Slc16a5 (-20833), 4933422H20Rik (+1100)
chr11	115564381	115564529	Merged-chr11-115564455-2	Nup85 (+21)
chr11	115608444	115608592	Merged-chr11-115608518-2	Gga3 (-4467)
chr11	116012697	116012845	Merged-chr11-116012771-1	Galk1 (-52)
chr11	116853724	116853872	Merged-chr11-116853798-1	Srsf2 (-704), Mfsd11 (-22)
chr11	116885956	116886104	Merged-chr11-116886030-2	Mgat5b (-32833), Mfsd11 (+32210)
chr11	117153726	117153874	Merged-chr11-117153800-2	Sept9 (-45861), Sec14l1 (+38628)
chr11	117319863	117320011	Merged-chr11-117319937-1	Gm11733 (-164431), Sept9 (+120276)
chr11	117403883	117404031	Merged-chr11-117403957-1	Gm11733 (-80411), Sept9 (+204296)
chr11	117438503	117438651	Merged-chr11-117438577-2	Gm11733 (-45791), Sept9 (+238916)
chr11	117438991	117439139	Merged-chr11-117439065-2	Gm11733 (-45303), Sept9 (+239404)
chr11	117451683	117451831	Merged-chr11-117451757-2	Gm11733 (-32611), Sept9 (+252096)
chr11	117475065	117475213	Merged-chr11-117475139-2	Gm11733 (-9229), Sept9 (+275478)
chr11	117521968	117522116	Merged-chr11-117522042-1	Tnrc6c (-132771), Gm11733 (+37674)
chr11	117832180	117832328	Merged-chr11-117832254-2	Birc5 (-16997), Tk1 (-6162)
chr11	117848972	117849120	Merged-chr11-117849046-2	Birc5 (-205)
chr11	117912780	117912928	Merged-chr11-117912854-2	Tha1 (-39395), Socs3 (+56332)
chr11	117930867	117931015	Merged-chr11-117930941-2	Tha1 (-57482), Socs3 (+38245)
chr11	117974790	117974938	Merged-chr11-117974864-2	Pgs1 (-11428), Socs3 (-5678)
chr11	117976150	117976298	Merged-chr11-117976224-1	Pgs1 (-10068), Socs3 (-7038)
chr11	118005376	118005524	Merged-chr11-118005450-2	Pgs1 (+19158), Dnahc17 (+123769)
chr11	118043441	118043589	Merged-chr11-118043515-2	Pgs1 (+57223), Dnahc17 (+85704)
chr11	118140729	118140877	Merged-chr11-118140803-2	Dnahc17 (-11584), Cyth1 (+71939)
chr11	118348526	118348674	Merged-chr11-118348600-1	BC100451 (-6100), Timp2 (+6906)
chr11	118349542	118349690	Merged-chr11-118349616-2	BC100451 (-7116), Timp2 (+5890)
chr11	118376527	118376675	Merged-chr11-118376601-2	Timp2 (-21095), Lgals3bp (+25491)
chr11	118648546	118648694	Merged-chr11-118648620-2	Engase (+171791), Rbfox3 (+260952)
chr11	119282650	119282798	Merged-chr11-119282724-2	Gaa (+14837), Eif4a3 (+17365)
chr11	120065407	120065555	Merged-chr11-120065481-2	Aatk (-18411), Azi1 (+21346)
chr11	120098523	120098671	Merged-chr11-120098597-2	1810043H04Rik (-331), Enthd2 (+134)
chr11	120164418	120164566	Merged-chr11-120164492-2	Bahcc1 (-68455), Slc38a10 (-13146)
chr11	120240263	120240411	Merged-chr11-120240337-1	Bahcc1 (+7390), Actg1 (+108205)
chr11	120624810	120624958	Merged-chr11-120624884-1	Sirt7 (+130)
chr11	120643699	120643847	Merged-chr11-120643773-1	Pycr1 (-103)
chr12	3691294	3691442	Merged-chr12-3691368-2	Dnmt3a (-115662), Dtnb (+118977)
chr12	3781168	3781316	Merged-chr12-3781242-2	Dnmt3a (-25788), Dtnb (+208851)
chr12	3806273	3806421	Merged-chr12-3806347-1	Dnmt3a (-683)
chr12	3852681	3852829	Merged-chr12-3852755-2	Pomc (-102196), Dnmt3a (+45725)
chr12	4593101	4593249	Merged-chr12-4593175-1	Itsn2 (+167)
chr12	4917851	4917999	Merged-chr12-4917925-1	Atad2b (+521)
chr12	8499945	8500093	Merged-chr12-8500019-1	Rhob (-34)
chr12	9358949	9359097	Merged-chr12-9359023-2	Osr1 (-215419), Ttc32 (+329026)
chr12	11782205	11782353	Merged-chr12-11782279-2	Fam49a (-479860), Rad51ap2 (+326200)
chr12	12177654	12177802	Merged-chr12-12177728-2	Fam49a (-84411), Rad51ap2 (+721649)
chr12	12788720	12788868	Merged-chr12-12788794-2	Rpl36-ps3 (-123192), Fam49a (+526655)
chr12	17652793	17652941	Merged-chr12-17652867-2	Hpcal1 (-37947), Odc1 (+107994)
chr12	17661657	17661805	Merged-chr12-17661731-2	Hpcal1 (-29083), Odc1 (+116858)
chr12	19175859	19176007	Merged-chr12-19175933-1	Gm5784 (-211876), Gm3944 (+322061)
chr12	21167881	21168029	Merged-chr12-21167955-2	Asap2 (+56207), Itgb1bp1 (+118282)
chr12	21431091	21431239	Merged-chr12-21431165-2	Ywhaq (-13729)
chr12	25098714	25098862	Merged-chr12-25098788-2	Id2 (-2696)
chr12	25144716	25144864	Merged-chr12-25144790-2	Id2 (-48698)
chr12	25475554	25475702	Merged-chr12-25475628-2	Id2 (-379536), Rnf144a (+939628)
chr12	25702333	25702481	Merged-chr12-25702407-2	Id2 (-606315), Rnf144a (+712849)
chr12	26068213	26068361	Merged-chr12-26068287-2	Id2 (-972195), Rnf144a (+346969)
chr12	26315096	26315244	Merged-chr12-26315170-2	Rnf144a (+100086)
chr12	27065114	27065262	Merged-chr12-27065188-2	Sox11 (+277521), Cmpk2 (+595984)
chr12	27139757	27139905	Merged-chr12-27139831-1	Sox11 (+202878), Cmpk2 (+670627)
chr12	27140396	27140544	Merged-chr12-27140470-2	Sox11 (+202239), Cmpk2 (+671266)
chr12	28817461	28817609	Merged-chr12-28817535-2	Myt1l (-710849), Tssc1 (+65707)
chr12	28972112	28972260	Merged-chr12-28972186-2	Myt1l (-556198), Tssc1 (+220358)
chr12	29130236	29130384	Merged-chr12-29130310-2	Myt1l (-398074), Tssc1 (+378482)
chr12	30430751	30430899	Merged-chr12-30430825-1	Tmem18 (-153618), Sntg2 (-57450)
chr12	33176082	33176230	Merged-chr12-33176156-2	Atxn7l1 (-126359), Cdhr3 (-83281)
chr12	35313326	35313474	Merged-chr12-35313400-2	Ahr (+221638), Snx13 (+266211)
chr12	39742261	39742409	Merged-chr12-39742335-1	Arl4a (+295094), Etv1 (+962253)
chr12	40917556	40917704	Merged-chr12-40917630-2	Immp2l (-106460), Dock4 (+471577)
chr12	51166119	51166267	Merged-chr12-51166193-2	Prkd1 (-516970), G2e3 (-182095)
chr12	51829696	51829844	Merged-chr12-51829770-2	Hectd1 (-234)
chr12	54326677	54326825	Merged-chr12-54326751-2	Egln3 (-122891), Sptssa (+329821)
chr12	54696783	54696931	Merged-chr12-54696857-1	Eapp (-976)
chr12	59040412	59040560	Merged-chr12-59040486-1	Trappc6b (+20975), Gemin2 (+27093)
chr12	64902679	64902827	Merged-chr12-64902753-2	Fscb (-427855), Gm527 (-15158)
chr12	65073740	65073888	Merged-chr12-65073814-2	Fancm (-1792), Fkbp3 (+130)
chr12	65479209	65479357	Merged-chr12-65479283-1	Wdr20b (+253766), Rpl10l (+805118)
chr12	69076777	69076925	Merged-chr12-69076851-2	Rps29 (+82335)
chr12	69476864	69477012	Merged-chr12-69476938-2	Gm9887 (-104480), Mettl21d (+106090)
chr12	70853061	70853209	Merged-chr12-70853135-2	Actr10 (-84722), Frmd6 (+27621)
chr12	71016104	71016252	Merged-chr12-71016178-2	Arid4a (+188)
chr12	71886161	71886309	Merged-chr12-71886235-1	Daam1 (+55157), Gpr135 (+184756)
chr12	72070374	72070522	Merged-chr12-72070448-2	Gpr135 (+543)
chr12	72687886	72688034	Merged-chr12-72687960-2	Ppm1a (-73251), Dhrs7 (-23132)
chr12	72688398	72688546	Merged-chr12-72688472-2	Ppm1a (-72739), Dhrs7 (-23644)
chr12	72761113	72761261	Merged-chr12-72761187-1	Ppm1a (-24)
chr12	73089032	73089180	Merged-chr12-73089106-2	Six1 (-41927), Six4 (+24931)
chr12	73242089	73242237	Merged-chr12-73242163-2	Trmt5 (+44548), Mnat1 (+118446)
chr12	76072038	76072186	Merged-chr12-76072112-2	Esr2 (+105147), Syne2 (+253794)
chr12	76710147	76710295	Merged-chr12-76710221-1	Sptb (+326)
chr12	78350909	78351057	Merged-chr12-78350983-1	Fam71d (-340552), Gphn (+124328)
chr12	80228055	80228203	Merged-chr12-80228129-1	Zfp36l1 (-115116), Actn1 (+32242)
chr12	80436634	80436782	Merged-chr12-80436708-1	Dcaf5 (-107)
chr12	80758201	80758349	Merged-chr12-80758275-1	Ccdc177 (+2266), Plekhd1 (+65684)
chr12	80858403	80858551	Merged-chr12-80858477-1	Srsf5 (-87108), 4933426M11Rik (+67945)
chr12	81776299	81776447	Merged-chr12-81776373-1	Map3k9 (+4797), Ttc9 (+145004)
chr12	82616764	82616912	Merged-chr12-82616838-2	Gm10006 (-1187)
chr12	83525524	83525672	Merged-chr12-83525598-1	Dcaf4 (+5132), Zfyve1 (+71549)
chr12	84625268	84625416	Merged-chr12-84625342-2	Vrtn (-17213), Abcd4 (-7876)
chr12	84729697	84729845	Merged-chr12-84729771-2	Syndig1l (-30964), Npc2 (+43341)
chr12	85140850	85140998	Merged-chr12-85140924-2	Rps6kl1 (+10340), Dlst (+30091)
chr12	85192948	85193096	Merged-chr12-85193022-2	Eif2b2 (-26459), Pgf (-15726)
chr12	86167287	86167435	Merged-chr12-86167361-2	Gpatch2l (-74529), Ift43 (+84800)
chr12	86466311	86466459	Merged-chr12-86466385-2	Vash1 (-212315), Esrrb (+44741)
chr12	86498472	86498620	Merged-chr12-86498546-2	Vash1 (-180154), Esrrb (+76902)
chr12	86498857	86499005	Merged-chr12-86498931-1	Vash1 (-179769), Esrrb (+77287)
chr12	86501958	86502106	Merged-chr12-86502032-2	Vash1 (-176668), Esrrb (+80388)
chr12	86678939	86679087	Merged-chr12-86679013-1	Vash1 (+313)
chr12	86687673	86687821	Merged-chr12-86687747-1	Vash1 (+9047), Angel1 (+38713)
chr12	86801209	86801357	Merged-chr12-86801283-1	Gm6772 (+66900), Irf2bpl (+83531)
chr12	86804951	86805099	Merged-chr12-86805025-2	Gm6772 (+70642), Irf2bpl (+79789)
chr12	86884986	86885134	Merged-chr12-86885060-2	Irf2bpl (-246)
chr12	86984261	86984409	Merged-chr12-86984335-2	Zdhhc22 (+4341), 2310044G17Rik (+36992)
chr12	91589864	91590012	Merged-chr12-91589938-2	Gtf2a1 (+71)
chr12	91684350	91684498	Merged-chr12-91684424-2	Gtf2a1 (-94415), Ston2 (+102012)
chr12	98737612	98737760	Merged-chr12-98737686-2	Ptpn21 (-3041)
chr12	99067352	99067500	Merged-chr12-99067426-2	Ttc8 (+146814), Foxn3 (+325646)
chr12	99300087	99300235	Merged-chr12-99300161-2	Foxn3 (+92911), Ttc8 (+379549)
chr12	99505115	99505263	Merged-chr12-99505189-2	Foxn3 (-112117), Efcab11 (+378253)
chr12	99776741	99776889	Merged-chr12-99776815-1	Foxn3 (-383743), Efcab11 (+106627)
chr12	100003292	100003440	Merged-chr12-100003366-2	Psmc1 (-106820), Kcnk13 (+38841)
chr12	100201953	100202101	Merged-chr12-100202027-2	Calm1 (+2592), Ttc7b (+318795)
chr12	100304386	100304534	Merged-chr12-100304460-2	Calm1 (+105025), Ttc7b (+216362)
chr12	100337822	100337970	Merged-chr12-100337896-2	Calm1 (+138461), Ttc7b (+182926)
chr12	102344651	102344799	Merged-chr12-102344725-2	Rin3 (+61677), Lgmn (+95088)
chr12	102949625	102949773	Merged-chr12-102949699-1	Unc79 (+840)
chr12	103325526	103325674	Merged-chr12-103325600-2	Fam181a (+10641), Asb2 (+30401)
chr12	104534681	104534829	Merged-chr12-104534755-2	Gm10000 (+60267), Dicer1 (+217197)
chr12	104644799	104644947	Merged-chr12-104644873-2	Dicer1 (+107079), Gm10000 (+170385)
chr12	105002867	105003015	Merged-chr12-105002941-1	Syne3 (-4264)
chr12	105006667	105006815	Merged-chr12-105006741-2	Glrx5 (-25948), Syne3 (-8064)
chr12	105322342	105322490	Merged-chr12-105322416-1	D430019H16Rik (-131440), Tcl1 (-99679)
chr12	105550523	105550671	Merged-chr12-105550597-2	Bdkrb2 (-12575), D430019H16Rik (+96741)
chr12	106963950	106964098	Merged-chr12-106964024-1	3110018I06Rik (-524608), Vrk1 (+953761)
chr12	107980406	107980554	Merged-chr12-107980480-2	Bcl11b (+23122), 3110018I06Rik (+491848)
chr12	108792999	108793147	Merged-chr12-108793073-1	Yy1 (+100)
chr12	109542896	109543044	Merged-chr12-109542970-2	Rtl1 (+57360), Dlk1 (+90121)
chr12	110483977	110484125	Merged-chr12-110484051-1	Ppp2r5c (-1688)
chr12	110882475	110882623	Merged-chr12-110882549-1	Cinp (+6596), Zfp839 (+32270)
chr12	111021252	111021400	Merged-chr12-111021326-2	Ankrd9 (-42286), Rcor1 (-18472)
chr12	111136094	111136242	Merged-chr12-111136168-2	Traf3 (-30295), Rcor1 (+96370)
chr12	111260719	111260867	Merged-chr12-111260793-2	4930595D18Rik (-76302), Amn (-10318)
chr12	111275029	111275177	Merged-chr12-111275103-1	Amn (+3992), Cdc42bpb (+102615)
chr12	111504989	111505137	Merged-chr12-111505063-2	Eif5 (-33038), Gm266 (-19240)
chr12	111538295	111538443	Merged-chr12-111538369-1	Eif5 (+268)
chr12	111696311	111696459	Merged-chr12-111696385-2	Bag5 (+16872), Trmt61a (+18280)
chr12	111701244	111701392	Merged-chr12-111701318-2	Bag5 (+11939), Trmt61a (+23213)
chr12	111774410	111774558	Merged-chr12-111774484-2	Klc1 (+15635), Xrcc3 (+39357)
chr12	112164560	112164708	Merged-chr12-112164634-2	Kif26a (+18399), A730018C14Rik (+258578)
chr12	112206732	112206880	Merged-chr12-112206806-2	Kif26a (+60571), A730018C14Rik (+216406)
chr12	112473796	112473944	Merged-chr12-112473870-1	A730018C14Rik (-50658), A530016L24Rik (-15578)
chr12	112939001	112939149	Merged-chr12-112939075-2	Jag2 (-9580), Nudt14 (+3043)
chr12	113140323	113140471	Merged-chr12-113140397-2	Crip2 (+161)
chr12	115808889	115809037	Merged-chr12-115808963-2	Zfp386 (-238813), Ighv1-73 (-18079)
chr12	116281459	116281607	Merged-chr12-116281533-1	Esyt2 (+311)
chr12	117450285	117450433	Merged-chr12-117450359-2	Rapgef5 (-66120), Ptprn2 (+964639)
chr13	3642132	3642280	Merged-chr13-3642206-2	Asb13 (+8174), Calml3 (+162112)
chr13	3712664	3712812	Merged-chr13-3712738-1	Asb13 (+78706), Calml3 (+91580)
chr13	6675063	6675211	Merged-chr13-6675137-1	Pfkp (-26360)
chr13	9329425	9329573	Merged-chr13-9329499-2	Dip2c (+52971), Zmynd11 (+435815)
chr13	9834274	9834422	Merged-chr13-9834348-1	Zmynd11 (-69034), Chrm3 (+44650)
chr13	11959580	11959728	Merged-chr13-11959654-2	Ryr2 (+147291)
chr13	12340844	12340992	Merged-chr13-12340918-1	Actn2 (-158)
chr13	12851916	12852064	Merged-chr13-12851990-1	Prl2c3 (-51912), Prl2c2 (+153393)
chr13	12889726	12889874	Merged-chr13-12889800-1	Prl2c3 (-89722), Prl2c2 (+115583)
chr13	12919822	12919970	Merged-chr13-12919896-1	Prl2c3 (-119818), Prl2c2 (+85487)
chr13	12940939	12941087	Merged-chr13-12941013-1	Prl2c3 (-140935), Prl2c2 (+64370)
chr13	14092624	14092772	Merged-chr13-14092698-2	Arid4b (+28906), Hecw1 (+430528)
chr13	19631065	19631213	Merged-chr13-19631139-2	Sfrp4 (+7964), Nme8 (+66655)
chr13	20188320	20188468	Merged-chr13-20188394-2	Aoah (-605725), Elmo1 (+97775)
chr13	21180659	21180807	Merged-chr13-21180733-2	Trim27 (+520)
chr13	23544437	23544585	Merged-chr13-23544511-2	Hist1h2bh (-1152), Hist1h3f (+459)
chr13	23555038	23555186	Merged-chr13-23555112-1	Hist1h4f (-3464), Hist1h1d (+80)
chr13	23562238	23562386	Merged-chr13-23562312-2	Hist1h3e (+57)
chr13	23738824	23738972	Merged-chr13-23738898-2	Hist1h1c (+91)
chr13	23757312	23757460	Merged-chr13-23757386-1	Hist1h4b (+449)
chr13	24845137	24845285	Merged-chr13-24845211-2	D130043K22Rik (+76)
chr13	28811757	28811905	Merged-chr13-28811831-2	Sox4 (+141882), Prl5a1 (+669347)
chr13	29034541	29034689	Merged-chr13-29034615-2	Sox4 (-80902), Cdkal1 (+821059)
chr13	29596822	29596970	Merged-chr13-29596896-2	Sox4 (-643183), Cdkal1 (+258778)
chr13	31293294	31293442	Merged-chr13-31293368-2	Foxq1 (-264802), Gm5447 (+319164)
chr13	31822876	31823024	Merged-chr13-31822950-2	Foxc1 (+16304), Gmds (+515762)
chr13	32802211	32802359	Merged-chr13-32802285-1	Wrnip1 (+247), D930007J09Rik (+564)
chr13	34345199	34345347	Merged-chr13-34345273-2	Slc22a23 (-91)
chr13	34741854	34742002	Merged-chr13-34741928-2	Prpf4b (-133566), Fam50b (+7078)
chr13	34746720	34746868	Merged-chr13-34746794-2	Prpf4b (-128700), Fam50b (+11944)
chr13	35740782	35740930	Merged-chr13-35740856-1	Cdyl (+80994), Rpp40 (+165503)
chr13	35741597	35741745	Merged-chr13-35741671-2	Cdyl (+81809), Rpp40 (+164688)
chr13	37311571	37311719	Merged-chr13-37311645-2	F13a1 (-262432), Ly86 (-33700)
chr13	37517487	37517635	Merged-chr13-37517561-2	Rreb1 (-308754), Ly86 (+172216)
chr13	38109124	38109272	Merged-chr13-38109198-1	Dsp (-42150), Riok1 (+72209)
chr13	40258856	40259004	Merged-chr13-40258930-2	Ofcc1 (+29081)
chr13	40669900	40670048	Merged-chr13-40669974-2	Ofcc1 (-381963), Gm9979 (-34031)
chr13	41249766	41249914	Merged-chr13-41249840-2	Smim13 (-20)
chr13	44409612	44409760	Merged-chr13-44409686-1	Jarid2 (-321585), Cd83 (+624579)
chr13	44869920	44870068	Merged-chr13-44869994-1	Dtnbp1 (+132102), Jarid2 (+138723)
chr13	46418291	46418439	Merged-chr13-46418365-1	Rbm24 (+65)
chr13	46429136	46429284	Merged-chr13-46429210-2	Cap2 (-72638), Rbm24 (+10910)
chr13	46535173	46535321	Merged-chr13-46535247-2	C78339 (-134275), Cap2 (+33399)
chr13	46619722	46619870	Merged-chr13-46619796-2	C78339 (-49726), Cap2 (+117948)
chr13	46727665	46727813	Merged-chr13-46727739-1	Nup153 (+201)
chr13	47043902	47044050	Merged-chr13-47043976-2	Tpmt (-766), Kdm1b (+477)
chr13	48159162	48159310	Merged-chr13-48159236-2	4931429P17Rik (-140628), Id4 (-102191)
chr13	48426972	48427120	Merged-chr13-48427046-2	Zfp169 (+86348), Id4 (+165619)
chr13	48545630	48545778	Merged-chr13-48545704-2	A830005F24Rik (+32134), Ptpdc1 (+79869)
chr13	48944654	48944802	Merged-chr13-48944728-1	Phf2 (-73843), Fam120a (+23289)
chr13	49020334	49020482	Merged-chr13-49020408-2	Fam120a (-52391), Wnk2 (+127606)
chr13	49128111	49128259	Merged-chr13-49128185-1	Fam120a (-160168), Wnk2 (+19829)
chr13	49147924	49148072	Merged-chr13-49147998-1	Wnk2 (+16)
chr13	49187320	49187468	Merged-chr13-49187394-2	Ninj1 (-91)
chr13	49188749	49188897	Merged-chr13-49188823-1	Ninj1 (+1338), 1110007C09Rik (+27203)
chr13	50907100	50907248	Merged-chr13-50907174-2	Spin1 (-193706), Gm8765 (+208845)
chr13	50912846	50912994	Merged-chr13-50912920-2	Spin1 (-187960), Gm8765 (+214591)
chr13	51070484	51070632	Merged-chr13-51070558-2	Spin1 (-30322), Gm8765 (+372229)
chr13	51078540	51078688	Merged-chr13-51078614-1	Spin1 (-22266), Gm8765 (+380285)
chr13	51378349	51378497	Merged-chr13-51378423-2	Hist1h2al (-175358), S1pr3 (-30195)
chr13	51631449	51631597	Merged-chr13-51631523-2	Shc3 (-64439), Cks2 (-13709)
chr13	51748566	51748714	Merged-chr13-51748640-2	Gm15440 (-47599), Sema4d (+45107)
chr13	51845906	51846054	Merged-chr13-51845980-2	Gadd45g (-698)
chr13	51846562	51846710	Merged-chr13-51846636-2	Gadd45g (-42)
chr13	51848769	51848917	Merged-chr13-51848843-2	Gadd45g (+2165), Diras2 (+681993)
chr13	51918981	51919129	Merged-chr13-51919055-2	Gadd45g (+72377), Diras2 (+611781)
chr13	51920626	51920774	Merged-chr13-51920700-2	Gadd45g (+74022), Diras2 (+610136)
chr13	51921321	51921469	Merged-chr13-51921395-2	Gadd45g (+74717), Diras2 (+609441)
chr13	51975985	51976133	Merged-chr13-51976059-1	Gadd45g (+129381), Diras2 (+554777)
chr13	54216111	54216259	Merged-chr13-54216185-2	Cplx2 (-155164), Hrh2 (+24056)
chr13	54371718	54371866	Merged-chr13-54371792-2	Cplx2 (+443)
chr13	54565844	54565992	Merged-chr13-54565918-1	4833439L19Rik (-483)
chr13	54794322	54794470	Merged-chr13-54794396-1	Unc5a (-155015), Tspan17 (+5019)
chr13	55199687	55199835	Merged-chr13-55199761-1	Nsd1 (-10021), Fgfr4 (+47121)
chr13	55205588	55205736	Merged-chr13-55205662-2	Nsd1 (-4120)
chr13	55211126	55211274	Merged-chr13-55211200-2	Nsd1 (+1418), Rab24 (+110780)
chr13	55212465	55212613	Merged-chr13-55212539-2	Nsd1 (+2757), Rab24 (+109441)
chr13	55374362	55374510	Merged-chr13-55374436-2	Slc34a1 (-25212), Rgs14 (+4704)
chr13	55484670	55484818	Merged-chr13-55484744-2	Dbn1 (+3367), Prr7 (+20477)
chr13	55504435	55504583	Merged-chr13-55504509-2	Dbn1 (-16398), Pdlim7 (+8937)
chr13	55600108	55600256	Merged-chr13-55600182-1	B4galt7 (+117)
chr13	56630656	56630804	Merged-chr13-56630730-2	Smad5 (-72280), Tgfbi (+21127)
chr13	56671372	56671520	Merged-chr13-56671446-2	Smad5 (-31564), Tgfbi (+61843)
chr13	57909710	57909858	Merged-chr13-57909784-2	Spock1 (-2197)
chr13	57949598	57949746	Merged-chr13-57949672-1	Spock1 (-42085), Klhl3 (+152756)
chr13	58954846	58954994	Merged-chr13-58954920-2	Ntrk2 (+147020), Agtpbp1 (+602369)
chr13	59096641	59096789	Merged-chr13-59096715-1	Ntrk2 (+288815), Agtpbp1 (+460574)
chr13	59657204	59657352	Merged-chr13-59657278-1	Golm1 (+18506), Naa35 (+71983)
chr13	59770251	59770399	Merged-chr13-59770325-1	Isca1 (-515)
chr13	60177755	60177903	Merged-chr13-60177829-2	Gas1 (-464)
chr13	60602009	60602157	Merged-chr13-60602083-2	Dapk1 (+136)
chr13	63279007	63279155	Merged-chr13-63279081-2	Fancc (+152664), 2010111I01Rik (+264147)
chr13	63719614	63719762	Merged-chr13-63719688-2	Ptch1 (-154168), Ercc6l2 (-95646)
chr13	63980055	63980203	Merged-chr13-63980129-2	Hsd17b3 (+109072), Ercc6l2 (+164795)
chr13	64025073	64025221	Merged-chr13-64025147-2	Hsd17b3 (+64054), Ercc6l2 (+209813)
chr13	64152342	64152490	Merged-chr13-64152416-2	Zfp367 (+786)
chr13	64226911	64227059	Merged-chr13-64226985-2	Cdc14b (+47988), Habp4 (+65119)
chr13	64568961	64569109	Merged-chr13-64569035-1	1190003K10Rik (-71243), Cntnap3 (+334853)
chr13	66311939	66312087	Merged-chr13-66312013-2	Gm10772 (-84440), Vmn2r-ps104 (+43372)
chr13	66640879	66641027	Merged-chr13-66640953-1	2410141K09Rik (-199875), Zfp640 (+32377)
chr13	66715340	66715488	Merged-chr13-66715414-1	Zfp640 (-42084), Gm17404 (+136099)
chr13	66715808	66715956	Merged-chr13-66715882-2	Zfp640 (-42552), Gm17404 (+135631)
chr13	67683595	67683743	Merged-chr13-67683669-2	Zfp738 (-202)
chr13	67724395	67724543	Merged-chr13-67724469-2	Zfp738 (-41002), Zfp71-rs1 (+4650)
chr13	69667398	69667546	Merged-chr13-69667472-2	Nsun2 (+55456), Ube2ql1 (+72425)
chr13	70379393	70379541	Merged-chr13-70379467-2	BC018507 (+258167), Med10 (+569585)
chr13	72817861	72818009	Merged-chr13-72817935-2	Irx4 (-442562), Irx2 (+189115)
chr13	73603957	73604105	Merged-chr13-73604031-2	Clptm1l (+29)
chr13	75707434	75707582	Merged-chr13-75707508-1	Ell2 (+24)
chr13	76003766	76003914	Merged-chr13-76003840-1	Rfesd (+14722), Spata9 (+36101)
chr13	76384176	76384324	Merged-chr13-76384250-2	Gm10760 (+778)
chr13	81633208	81633356	Merged-chr13-81633282-1	Gpr98 (-128)
chr13	84348186	84348334	Merged-chr13-84348260-2	Tmem161b (+125964), Gm4076 (+779254)
chr13	86345399	86345547	Merged-chr13-86345473-2	Cox7c (-298569)
chr13	87452561	87452709	Merged-chr13-87452635-2	NONE
chr13	89739383	89739531	Merged-chr13-89739457-1	Vcan (+3052), Hapln1 (+198821)
chr13	93499623	93499771	Merged-chr13-93499697-1	Jmy (+111)
chr13	93771782	93771930	Merged-chr13-93771856-2	Arsb (+177)
chr13	95018086	95018234	Merged-chr13-95018160-2	Wdr41 (+41812), Pde8b (+204906)
chr13	95534299	95534447	Merged-chr13-95534373-2	F2rl1 (-9133), F2r (+84086)
chr13	95535256	95535404	Merged-chr13-95535330-2	F2rl1 (-10090), F2r (+83129)
chr13	96660146	96660294	Merged-chr13-96660220-2	Hmgcr (+10716), Col4a3bp (+117485)
chr13	97292123	97292271	Merged-chr13-97292197-1	Enc1 (+51092), Gm10260 (+468391)
chr13	98926217	98926365	Merged-chr13-98926291-1	Tnpo1 (+93)
chr13	100786653	100786801	Merged-chr13-100786727-2	Ccnb1 (-157)
chr13	100990771	100990919	Merged-chr13-100990845-2	Slc30a5 (-157418), Pik3r1 (+777372)
chr13	102896114	102896262	Merged-chr13-102896188-1	Cd180 (+202630), Mast4 (+438272)
chr13	104911668	104911816	Merged-chr13-104911742-2	Fam159b (-47849), Rgs7bp (+143188)
chr13	107668625	107668773	Merged-chr13-107668699-2	Zswim6 (+221365), 3830408C21Rik (+636736)
chr13	107678962	107679110	Merged-chr13-107679036-2	Zswim6 (+211028), 3830408C21Rik (+647073)
chr13	108214298	108214446	Merged-chr13-108214372-1	Elovl7 (-32)
chr13	109260234	109260382	Merged-chr13-109260308-2	Pde4d (-693801), Rps3a3 (+589728)
chr13	110048857	110049005	Merged-chr13-110048931-1	Pde4d (+94822), Rab3c (+231275)
chr13	111550615	111550763	Merged-chr13-111550689-1	Gpbp1 (-60578), Gm10198 (-42096)
chr13	111687595	111687743	Merged-chr13-111687669-1	Mier3 (+1491), Map3k1 (+121324)
chr13	111808714	111808862	Merged-chr13-111808788-1	Map3k1 (+205)
chr13	112365843	112365991	Merged-chr13-112365917-2	Il6st (-109091), Ankrd55 (+77466)
chr13	112578142	112578290	Merged-chr13-112578216-1	Il31ra (+2446), Il6st (+103208)
chr13	112987531	112987679	Merged-chr13-112987605-1	Ccno (-197)
chr13	113678315	113678463	Merged-chr13-113678389-2	Arl15 (-116116), Hspb3 (-14713)
chr13	114171207	114171355	Merged-chr13-114171281-2	Ndufs4 (+216813), Arl15 (+376776)
chr14	5899910	5900058	Merged-chr14-5899984-1	Gm3424 (-69655), Gm3453 (+79153)
chr14	5904288	5904436	Merged-chr14-5904362-1	Gm3424 (-74033), Gm3453 (+74775)
chr14	5928341	5928489	Merged-chr14-5928415-1	Gm3424 (-98086), Gm3453 (+50722)
chr14	6932772	6932920	Merged-chr14-6932846-2	Gm3642 (-92535), Gm3685 (+112061)
chr14	7752707	7752855	Merged-chr14-7752781-2	Gm10338 (-157189), Flnb (-65176)
chr14	7774013	7774161	Merged-chr14-7774087-2	Gm10338 (-178495), Flnb (-43870)
chr14	7954105	7954253	Merged-chr14-7954179-2	Dnase1l3 (+40394), Flnb (+136222)
chr14	8214121	8214269	Merged-chr14-8214195-2	Kctd6 (-307)
chr14	8403452	8403600	Merged-chr14-8403526-1	Oit1 (-24763), 4930452B06Rik (+262714)
chr14	11519229	11519377	Merged-chr14-11519303-2	ENSMUSG00000097148 (-162577), Ptprg (-34229)
chr14	12103352	12103500	Merged-chr14-12103426-2	3830406C13Rik (-180783), Ptprg (+549894)
chr14	13770838	13770986	Merged-chr14-13770912-2	Sntn (+100036), Gm281 (+143566)
chr14	19762147	19762295	Merged-chr14-19762221-1	Nid2 (+10964), 2700060E02Rik (+61602)
chr14	20702919	20703067	Merged-chr14-20702993-1	Zswim8 (-4559), Chchd1 (-34)
chr14	21051900	21052048	Merged-chr14-21051974-2	Adk (-600), Ap3m1 (+476)
chr14	24004917	24005065	Merged-chr14-24004991-1	Kcnma1 (-201687), Dlg5 (+240929)
chr14	24253989	24254137	Merged-chr14-24254063-2	E330034G19Rik (-39301), Dlg5 (-8143)
chr14	25318140	25318288	Merged-chr14-25318214-1	Zmiz1 (-141010), Rps24 (+827533)
chr14	25512971	25513119	Merged-chr14-25513045-1	Ppif (-181125), Zmiz1 (+53821)
chr14	25747700	25747848	Merged-chr14-25747774-1	Zcchc24 (+21082), Ppif (+53604)
chr14	25754942	25755090	Merged-chr14-25755016-2	Zcchc24 (+13840), Ppif (+60846)
chr14	26669288	26669436	Merged-chr14-26669362-1	Pde12 (+521)
chr14	26867807	26867955	Merged-chr14-26867881-1	Asb14 (-26676), Dnahc12 (+174607)
chr14	28958734	28958882	Merged-chr14-28958808-1	Lrtm1 (-59400), Wnt5a (+454058)
chr14	29722016	29722164	Merged-chr14-29722090-1	Cacna2d3 (-226)
chr14	30826043	30826191	Merged-chr14-30826117-2	Tmem110 (+527)
chr14	31571536	31571684	Merged-chr14-31571610-2	Colq (+5773), Eaf1 (+76531)
chr14	31829967	31830115	Merged-chr14-31830041-2	Ankrd28 (+374)
chr14	32095761	32095909	Merged-chr14-32095835-2	Msmb (-46191), Dph3 (-10226)
chr14	32634462	32634610	Merged-chr14-32634536-2	Prrxl1 (+34609), 3425401B19Rik (+50736)
chr14	33535444	33535592	Merged-chr14-33535518-1	Mapk8 (-88360), Ptpn20 (-53752)
chr14	33548358	33548506	Merged-chr14-33548432-2	Mapk8 (-101274), Ptpn20 (-40838)
chr14	34303321	34303469	Merged-chr14-34303395-1	Fam35a (+7108), Syt15 (+83348)
chr14	34816345	34816493	Merged-chr14-34816419-1	Grid1 (-3406)
chr14	34831256	34831404	Merged-chr14-34831330-1	Grid1 (+11505), 4930596D02Rik (+980648)
chr14	37136395	37136543	Merged-chr14-37136469-2	Ghitm (-1330)
chr14	45507191	45507339	Merged-chr14-45507265-1	Gnpnat1 (-118463), Fermt2 (+22853)
chr14	45658023	45658171	Merged-chr14-45658097-2	Ddhd1 (+1)
chr14	47356713	47356861	Merged-chr14-47356787-2	Lgals3 (-17026), Mapk1ip1l (+48222)
chr14	47572885	47573033	Merged-chr14-47572959-1	Atg14 (-4525)
chr14	48475666	48475814	Merged-chr14-48475740-2	Tmem260 (+29358), Otx2 (+189506)
chr14	48655141	48655289	Merged-chr14-48655215-2	Otx2 (+10031), Tmem260 (+208833)
chr14	49066214	49066362	Merged-chr14-49066288-2	Ap5m1 (-207), Exoc5 (+365)
chr14	53577212	53577360	Merged-chr14-53577286-2	Trav9n-1 (+475593), Dad1 (+676628)
chr14	54383703	54383851	Merged-chr14-54383777-2	Oxa1l (+22936), Slc7a7 (+25695)
chr14	54464175	54464323	Merged-chr14-54464249-1	Lrp10 (+85)
chr14	54554054	54554202	Merged-chr14-54554128-1	Haus4 (+233)
chr14	54577715	54577863	Merged-chr14-54577789-2	Ajuba (-128)
chr14	54632213	54632361	Merged-chr14-54632287-1	Psmb11 (+6977), Cdh24 (+9077)
chr14	55497434	55497582	Merged-chr14-55497508-2	Cpne6 (-12940), Lrrc16b (+6415)
chr14	55635499	55635647	Merged-chr14-55635573-2	Ipo4 (+111)
chr14	56278493	56278641	Merged-chr14-56278567-2	Atp12a (-86501), Gzmb (-16307)
chr14	56571998	56572146	Merged-chr14-56572072-2	Parp4 (-3547), Cenpj (-226)
chr14	56886138	56886286	Merged-chr14-56886212-1	Zmym2 (-1583)
chr14	56887980	56888128	Merged-chr14-56888054-2	Zmym2 (+259)
chr14	57362883	57363031	Merged-chr14-57362957-1	Gjb6 (-229346), Cryl1 (+35526)
chr14	57525436	57525584	Merged-chr14-57525510-2	Il17d (+681)
chr14	57665077	57665225	Merged-chr14-57665151-2	Xpo4 (+279)
chr14	58190125	58190273	Merged-chr14-58190199-2	Rpl13-ps3 (-703307), Fgf9 (+117513)
chr14	59626186	59626334	Merged-chr14-59626260-2	Shisa2 (+979)
chr14	61603168	61603316	Merged-chr14-61603242-1	Kcnrg (-4240)
chr14	61648786	61648934	Merged-chr14-61648860-1	Kcnrg (+41378), Dleu7 (+644119)
chr14	62292933	62293081	Merged-chr14-62293007-2	Dleu7 (-28)
chr14	62425276	62425424	Merged-chr14-62425350-2	Gucy1b2 (+30939), Rnaseh2b (+93282)
chr14	63182774	63182922	Merged-chr14-63182848-2	Fdft1 (-5055), Neil2 (+10693)
chr14	63489382	63489530	Merged-chr14-63489456-1	Tdh (+19636), Fam167a (+53062)
chr14	64163698	64163846	Merged-chr14-64163772-1	Prss52 (+59486), Msra (+292131)
chr14	64174634	64174782	Merged-chr14-64174708-2	Prss52 (+70422), Msra (+281195)
chr14	64585415	64585563	Merged-chr14-64585489-1	Msra (-129586), Kif13b (-67042)
chr14	64591556	64591704	Merged-chr14-64591630-1	Msra (-135727), Kif13b (-60901)
chr14	65097908	65098056	Merged-chr14-65097982-1	Extl3 (+124)
chr14	66282745	66282893	Merged-chr14-66282819-2	Ptk2b (-1767)
chr14	66836014	66836162	Merged-chr14-66836088-2	Dpysl2 (+32600), Gm10032 (+51559)
chr14	67716337	67716485	Merged-chr14-67716411-2	Cdca2 (-801), Kctd9 (+149)
chr14	68934955	68935103	Merged-chr14-68935029-2	Adam28 (-279187), Stc1 (-94260)
chr14	70461260	70461408	Merged-chr14-70461334-2	Phyhip (+3858), Bmp1 (+58926)
chr14	73385144	73385292	Merged-chr14-73385218-1	Itm2b (+53)
chr14	75845353	75845501	Merged-chr14-75845427-1	Tpt1 (+334)
chr14	78288926	78289074	Merged-chr14-78289000-2	Fam216b (-199993), Tnfsf11 (+19043)
chr14	78462382	78462530	Merged-chr14-78462456-1	Tnfsf11 (-154413), Akap11 (+74404)
chr14	79639403	79639551	Merged-chr14-79639477-2	Lect1 (+22693), Sugt1 (+51786)
chr14	79769771	79769919	Merged-chr14-79769845-2	Lect1 (-107675), Pcdh8 (+1467)
chr14	79785509	79785657	Merged-chr14-79785583-2	Olfm4 (-214719), Pcdh8 (-14271)
chr14	100750275	100750423	Merged-chr14-100750349-2	Klf12 (-600585), 1700110M21Rik (+449720)
chr14	101742194	101742342	Merged-chr14-101742268-2	Lmo7 (+12311)
chr14	103354697	103354845	Merged-chr14-103354771-1	Scel (-158570), Mycbp2 (-7971)
chr14	103650417	103650565	Merged-chr14-103650491-2	Slain1 (+263)
chr14	103650955	103651103	Merged-chr14-103651029-2	Slain1 (+801)
chr14	104430896	104431044	Merged-chr14-104430970-1	Ednrb (-587274), Pou4f1 (+37021)
chr14	114244582	114244730	Merged-chr14-114244656-2	Gpc5 (-847970), Tpm3-rs7 (+930048)
chr14	114959788	114959936	Merged-chr14-114959862-2	Gpc5 (-132764)
chr14	118436895	118437043	Merged-chr14-118436969-2	Gm9376 (+169811), Abcc4 (+269250)
chr14	118640903	118641051	Merged-chr14-118640977-2	Abcc4 (+65242), Gm9376 (+373819)
chr14	118695973	118696121	Merged-chr14-118696047-2	Abcc4 (+10172), Gm9376 (+428889)
chr14	121506379	121506527	Merged-chr14-121506453-2	Slc15a1 (-1199)
chr14	121542973	121543121	Merged-chr14-121543047-2	Slc15a1 (-37793), Dock9 (+155370)
chr14	122255571	122255719	Merged-chr14-122255645-2	Clybl (+73951), Zic5 (+210032)
chr14	122267698	122267846	Merged-chr14-122267772-2	Clybl (+86078), Zic5 (+197905)
chr14	122416352	122416500	Merged-chr14-122416426-2	Zic5 (+49251), Clybl (+234732)
chr14	122534348	122534496	Merged-chr14-122534422-1	Pcca (+83)
chr14	123660196	123660344	Merged-chr14-123660270-1	Itgbl1 (+299)
chr15	6909848	6909996	Merged-chr15-6909922-2	Lifr (-244431), Osmr (-34953)
chr15	7085189	7085337	Merged-chr15-7085263-2	Osmr (-210294), Lifr (-69090)
chr15	7167968	7168116	Merged-chr15-7168042-2	Lifr (+13689), Egflam (+230262)
chr15	7226407	7226555	Merged-chr15-7226481-2	Lifr (+72128), Egflam (+171823)
chr15	8279374	8279522	Merged-chr15-8279448-1	2410089E03Rik (+110342), Nipbl (+165015)
chr15	8568731	8568879	Merged-chr15-8568805-2	Gm2310 (-48852), Slc1a3 (+141959)
chr15	8569314	8569462	Merged-chr15-8569388-1	Gm2310 (-49435), Slc1a3 (+141376)
chr15	8968347	8968495	Merged-chr15-8968421-2	Ranbp3l (-5)
chr15	9094510	9094658	Merged-chr15-9094584-1	Nadkd1 (+23324), Skp2 (+45867)
chr15	12848320	12848468	Merged-chr15-12848394-2	Drosha (+23579), Cdh6 (+325245)
chr15	25762403	25762551	Merged-chr15-25762477-1	Fam134b (-80787), Myo10 (+139952)
chr15	25984260	25984408	Merged-chr15-25984334-2	Zfp622 (-32)
chr15	26784186	26784334	Merged-chr15-26784260-2	Fbxl7 (+110789), March11 (+475196)
chr15	27998902	27999050	Merged-chr15-27998976-1	Fam105a (-317434), Trio (+26872)
chr15	28071255	28071403	Merged-chr15-28071329-2	Dnahc5 (-132423), Trio (-45481)
chr15	31294453	31294601	Merged-chr15-31294527-2	Dap (+70142), Ankrd33b (+73199)
chr15	34837442	34837590	Merged-chr15-34837516-1	Kcns2 (+135)
chr15	34877101	34877249	Merged-chr15-34877175-2	Kcns2 (+39794), Stk3 (+278631)
chr15	36507900	36508048	Merged-chr15-36507974-1	Ankrd46 (-11183), Snx31 (+47599)
chr15	36609006	36609154	Merged-chr15-36609080-1	Pabpc1 (-107)
chr15	36716471	36716619	Merged-chr15-36716545-2	Pabpc1 (-107572), Ywhaz (+77993)
chr15	36792776	36792924	Merged-chr15-36792850-2	Pabpc1 (-183877), Ywhaz (+1688)
chr15	38251136	38251284	Merged-chr15-38251210-1	Odf1 (+32007), Klf10 (+49497)
chr15	38282443	38282591	Merged-chr15-38282517-2	Klf10 (+18190), Odf1 (+63314)
chr15	38384399	38384547	Merged-chr15-38384473-2	Klf10 (-83766), Azin1 (+134793)
chr15	38471028	38471176	Merged-chr15-38471102-2	Klf10 (-170395), Azin1 (+48164)
chr15	38518337	38518485	Merged-chr15-38518411-1	Azin1 (+855)
chr15	38519390	38519538	Merged-chr15-38519464-2	Azin1 (-198)
chr15	41123080	41123228	Merged-chr15-41123154-1	Oxr1 (-324328), Zfpm2 (+468112)
chr15	41789289	41789437	Merged-chr15-41789363-2	Abra (+80357), Oxr1 (+341881)
chr15	44716074	44716222	Merged-chr15-44716148-2	Sybu (+71915), Ebag9 (+96507)
chr15	44787699	44787847	Merged-chr15-44787773-2	Sybu (+290)
chr15	51877614	51877762	Merged-chr15-51877688-1	Utp23 (+259)
chr15	52967889	52968037	Merged-chr15-52967963-2	Med30 (+255518), Ext1 (+378196)
chr15	55112656	55112804	Merged-chr15-55112730-1	Deptor (+413), Gm9920 (+852)
chr15	55906629	55906777	Merged-chr15-55906703-1	Sntb1 (+246)
chr15	56693079	56693227	Merged-chr15-56693153-1	Sntb1 (-786204), Has2 (+1386)
chr15	58063283	58063431	Merged-chr15-58063357-2	9130401M01Rik (-29063), Zhx1 (+13132)
chr15	59082354	59082502	Merged-chr15-59082428-1	Mtss1 (-402)
chr15	59189510	59189658	Merged-chr15-59189584-2	Sqle (-125497), Mtss1 (-107558)
chr15	59291611	59291759	Merged-chr15-59291685-2	Mtss1 (-209659), Sqle (-23396)
chr15	67018392	67018540	Merged-chr15-67018466-1	Ndrg1 (-48826), St3gal1 (+95526)
chr15	71554431	71554579	Merged-chr15-71554505-2	Fam135b (+173333)
chr15	72689916	72690064	Merged-chr15-72689990-1	Gm3150 (-223367), Kcnk9 (-143711)
chr15	73466739	73466887	Merged-chr15-73466813-2	Dennd3 (-45747), Ptk2 (-43622)
chr15	73506778	73506926	Merged-chr15-73506852-2	Ptk2 (-83661), Dennd3 (-5708)
chr15	73687711	73687859	Merged-chr15-73687785-1	Slc45a4 (-63041), Gpr20 (+19720)
chr15	73707332	73707480	Merged-chr15-73707406-2	Gpr20 (+99)
chr15	73748176	73748324	Merged-chr15-73748250-2	Gm6569 (-86311), Ptp4a3 (+23320)
chr15	74174604	74174752	Merged-chr15-74174678-2	Bai1 (-341518), Mroh5 (-335007)
chr15	74387572	74387720	Merged-chr15-74387646-1	Mroh5 (-547975), Bai1 (-128550)
chr15	74667812	74667960	Merged-chr15-74667886-2	Mroh4 (-31625), Arc (+4682)
chr15	74672358	74672506	Merged-chr15-74672432-2	Arc (+136)
chr15	74721205	74721353	Merged-chr15-74721279-2	Them6 (+45)
chr15	75981326	75981474	Merged-chr15-75981400-2	ENSMUSG00000098176 (+1042), Zfp707 (+12221)
chr15	76012887	76013035	Merged-chr15-76012961-2	Fam83h (-3463)
chr15	76369159	76369307	Merged-chr15-76369233-1	Fam203a (+335)
chr15	76617637	76617785	Merged-chr15-76617711-1	Slc39a4 (-859)
chr15	76639699	76639847	Merged-chr15-76639773-2	Tonsl (+185)
chr15	76817032	76817180	Merged-chr15-76817106-1	Arhgap39 (+977)
chr15	76976741	76976889	Merged-chr15-76976815-2	1110038F14Rik (+28276), Mb (+45972)
chr15	77358652	77358800	Merged-chr15-77358726-1	Rbfox2 (-51673), Apol7a (+40384)
chr15	77793212	77793360	Merged-chr15-77793286-2	Apol8 (-38057), Myh9 (+48889)
chr15	78388925	78389073	Merged-chr15-78388999-1	Tex33 (+6913), Csf2rb (+63009)
chr15	78436936	78437084	Merged-chr15-78437010-2	Kctd17 (+8382), Tmprss6 (+31624)
chr15	78486689	78486837	Merged-chr15-78486763-2	Tmprss6 (-18129), Il2rb (+8303)
chr15	78648157	78648305	Merged-chr15-78648231-2	Cyth4 (+51184), Elfn2 (+69882)
chr15	78713048	78713196	Merged-chr15-78713122-1	Elfn2 (+4991), Cyth4 (+116075)
chr15	78928093	78928241	Merged-chr15-78928167-2	Nol12 (-6766), Lgals1 (+1442)
chr15	79126415	79126563	Merged-chr15-79126489-2	1700088E04Rik (+14762), Micall1 (+17517)
chr15	79229313	79229461	Merged-chr15-79229387-1	Pick1 (+214)
chr15	79375209	79375357	Merged-chr15-79375283-1	Maff (+27742), Tmem184b (+28020)
chr15	79481363	79481511	Merged-chr15-79481437-2	Csnk1e (-39438), Kcnj4 (+23804)
chr15	79619869	79620017	Merged-chr15-79619943-2	Dmc1 (-14859), Fam227a (+39013)
chr15	79774558	79774706	Merged-chr15-79774632-2	Dnalc4 (-165)
chr15	79834248	79834396	Merged-chr15-79834322-1	Npcd (-85), Cbx6 (+366)
chr15	79883019	79883167	Merged-chr15-79883093-1	Cbx6 (-48405), Apobec3 (-9315)
chr15	79905445	79905593	Merged-chr15-79905519-2	Apobec3 (+13111), Cbx7 (+27133)
chr15	79932774	79932922	Merged-chr15-79932848-2	Cbx7 (-196)
chr15	80076682	80076830	Merged-chr15-80076756-1	Pdgfb (-61948), Rpl3 (+6650)
chr15	80169686	80169834	Merged-chr15-80169760-2	Mgat3 (-3961)
chr15	80822385	80822533	Merged-chr15-80822459-2	Adsl (-126031), Tnrc6b (+111140)
chr15	80977763	80977911	Merged-chr15-80977837-1	Sgsm3 (+72)
chr15	81744778	81744926	Merged-chr15-81744852-1	Zc3h7b (+4)
chr15	81811455	81811603	Merged-chr15-81811529-2	Tef (+115)
chr15	81831610	81831758	Merged-chr15-81831684-2	Gm8444 (+12015), Tef (+20270)
chr15	82080076	82080224	Merged-chr15-82080150-1	Ccdc134 (-47772), Mei1 (+10154)
chr15	82127741	82127889	Merged-chr15-82127815-2	Ccdc134 (-107)
chr15	82171075	82171223	Merged-chr15-82171149-1	Srebf2 (+23883), AI848285 (+41666)
chr15	82217089	82217237	Merged-chr15-82217163-2	AI848285 (-4348)
chr15	82274897	82275045	Merged-chr15-82274971-2	Sept3 (+36)
chr15	82968544	82968692	Merged-chr15-82968618-1	Tcf20 (-56484), Nfam1 (+54520)
chr15	83038098	83038246	Merged-chr15-83038172-2	Serhl (-62032), Nfam1 (-15034)
chr15	83432727	83432875	Merged-chr15-83432801-1	Pacsin2 (+49)
chr15	83444592	83444740	Merged-chr15-83444666-1	Pacsin2 (-11816), Ttll1 (+66227)
chr15	83453905	83454053	Merged-chr15-83453979-2	Pacsin2 (-21129), Ttll1 (+56914)
chr15	83535393	83535541	Merged-chr15-83535467-2	Bik (+8605), Mcat (+20244)
chr15	83673169	83673317	Merged-chr15-83673243-2	Ttll12 (-78086), Scube1 (+51778)
chr15	83961205	83961353	Merged-chr15-83961279-1	Efcab6 (+104070), Mpped1 (+176450)
chr15	83991519	83991667	Merged-chr15-83991593-1	Efcab6 (+73756), Mpped1 (+206764)
chr15	84212125	84212273	Merged-chr15-84212199-2	Parvb (-19844), Samm50 (+19966)
chr15	84450896	84451044	Merged-chr15-84450970-1	1810041L15Rik (-3873)
chr15	84657526	84657674	Merged-chr15-84657600-2	Ldoc1l (-99777), Prr5 (-23402)
chr15	84965656	84965804	Merged-chr15-84965730-1	5031439G07Rik (+22241), Nup50 (+42302)
chr15	85017114	85017262	Merged-chr15-85017188-1	Upk3a (+47)
chr15	88189478	88189626	Merged-chr15-88189552-2	Zdhhc25 (-410750), Fam19a5 (+564322)
chr15	88819259	88819407	Merged-chr15-88819333-2	Creld2 (-313), Alg12 (-15)
chr15	88862403	88862551	Merged-chr15-88862477-2	Pim3 (+291)
chr15	88881381	88881529	Merged-chr15-88881455-1	Pim3 (+19269), Ttll8 (+72955)
chr15	88916528	88916676	Merged-chr15-88916602-2	Ttll8 (+37808), Pim3 (+54416)
chr15	88919369	88919517	Merged-chr15-88919443-2	Ttll8 (+34967), Pim3 (+57257)
chr15	89373927	89374075	Merged-chr15-89374001-1	Sco2 (-183)
chr15	91078184	91078332	Merged-chr15-91078258-1	Kif21a (-28310), Abcd2 (+113549)
chr15	95790213	95790361	Merged-chr15-95790287-2	Ano6 (-556)
chr15	96135893	96136041	Merged-chr15-96135967-1	A130051J06Rik (-344325), Arid2 (-151606)
chr15	96297212	96297360	Merged-chr15-96297286-2	Arid2 (+9713), Scaf11 (+163557)
chr15	96333529	96333677	Merged-chr15-96333603-2	Arid2 (+46030), Scaf11 (+127240)
chr15	96460666	96460814	Merged-chr15-96460740-2	Scaf11 (+103)
chr15	96604419	96604567	Merged-chr15-96604493-2	Scaf11 (-143650), Slc38a1 (+37469)
chr15	96642771	96642919	Merged-chr15-96642845-2	Slc38a1 (-883)
chr15	96702647	96702795	Merged-chr15-96702721-2	Slc38a2 (-3023)
chr15	97342537	97342685	Merged-chr15-97342611-2	Amigo2 (-95324), Rpap3 (+363211)
chr15	97472301	97472449	Merged-chr15-97472375-2	Amigo2 (-225088), Rpap3 (+233447)
chr15	97767584	97767732	Merged-chr15-97767658-2	Rapgef3 (+188)
chr15	97784307	97784455	Merged-chr15-97784381-2	Slc48a1 (+26)
chr15	97992937	97993085	Merged-chr15-97993011-1	Col2a1 (+11684), Tmem106c (+28782)
chr15	98145237	98145385	Merged-chr15-98145311-1	Asb8 (+20314), Pfkm (+36840)
chr15	98288723	98288871	Merged-chr15-98288797-2	H1fnt (-31490), Zfp641 (+7286)
chr15	98743964	98744112	Merged-chr15-98744038-2	Fkbp11 (-15840), Arf3 (+19173)
chr15	98776293	98776441	Merged-chr15-98776367-2	Arf3 (-13156), Wnt10b (+1783)
chr15	98851659	98851807	Merged-chr15-98851733-2	Prkag1 (-20225), Mll2 (+19450)
chr15	98991170	98991318	Merged-chr15-98991244-2	Tuba1a (-37693), Gm8973 (-14812)
chr15	99236211	99236359	Merged-chr15-99236285-2	Kcnh3 (+11309), Mcrs1 (+15676)
chr15	99295246	99295394	Merged-chr15-99295320-2	Prpf40b (+49)
chr15	99420626	99420774	Merged-chr15-99420700-2	Tmbim6 (+27818), Nckap5l (+37048)
chr15	99531208	99531356	Merged-chr15-99531282-1	Faim2 (-3265)
chr15	99792477	99792625	Merged-chr15-99792551-2	Cers5 (-19950), Lima1 (+82877)
chr15	99875333	99875481	Merged-chr15-99875407-2	Lima1 (+21)
chr15	99890935	99891083	Merged-chr15-99891009-2	Lima1 (-15581), Fam186a (+40787)
chr15	100074845	100074993	Merged-chr15-100074919-1	Atf1 (-152900), Dip2b (+36255)
chr15	100770535	100770683	Merged-chr15-100770609-2	Scn8a (-100074), Slc4a8 (+8862)
chr15	100965181	100965329	Merged-chr15-100965255-2	Fignl2 (+89144), Scn8a (+94572)
chr15	101116989	101117137	Merged-chr15-101117063-2	Acvrl1 (-11459), Ankrd33 (+1308)
chr15	101228178	101228326	Merged-chr15-101228252-1	Nr4a1 (-38594), Grasp (+4045)
chr15	101235470	101235618	Merged-chr15-101235544-1	Nr4a1 (-31302), Grasp (+11337)
chr15	101397035	101397183	Merged-chr15-101397109-2	Krt80 (-26984), Krt7 (-15293)
chr15	101494350	101494498	Merged-chr15-101494424-2	5430421N21Rik (-2912)
chr15	101553362	101553510	Merged-chr15-101553436-2	Krt82 (-2777)
chr15	102005467	102005615	Merged-chr15-102005541-2	Krt8 (-1199)
chr15	102203461	102203609	Merged-chr15-102203535-1	Zfp740 (-4727)
chr15	102212064	102212212	Merged-chr15-102212138-1	Zfp740 (+3876), Itgb7 (+19797)
chr15	102250641	102250789	Merged-chr15-102250715-2	Itgb7 (-18780), Rarg (+6802)
chr15	102376939	102377087	Merged-chr15-102377013-2	Sp1 (-29367), Sp7 (-10688)
chr15	102399593	102399741	Merged-chr15-102399667-2	Sp7 (-33342), Sp1 (-6713)
chr15	102470881	102471029	Merged-chr15-102470955-1	Pcbp2 (+323)
chr15	103155812	103155960	Merged-chr15-103155886-1	Smug1 (+2116), Hoxc4 (+121491)
chr15	103215305	103215453	Merged-chr15-103215379-2	Smug1 (-57377), Cbx5 (+24437)
chr15	103340918	103341066	Merged-chr15-103340992-1	Zfp385a (-906)
chr16	3116284	3116432	Merged-chr16-3116358-1	Olfr161 (-476040)
chr16	3872495	3872643	Merged-chr16-3872569-2	Zfp597 (-173)
chr16	3884407	3884555	Merged-chr16-3884481-2	Gm20695 (-167)
chr16	4549332	4549480	Merged-chr16-4549406-2	Srl (-26331), Tfap4 (+10314)
chr16	4658771	4658919	Merged-chr16-4658845-2	Vasn (+18904), Coro7 (+20932)
chr16	4679801	4679949	Merged-chr16-4679875-1	Dnaja3 (-4195), Coro7 (-98)
chr16	6289742	6289890	Merged-chr16-6289816-2	Rbfox1 (-780019)
chr16	8481777	8481925	Merged-chr16-8481851-2	Abat (-31578), Mettl22 (+11063)
chr16	8914295	8914443	Merged-chr16-8914369-1	1810013L24Rik (+84269)
chr16	9030092	9030240	Merged-chr16-9030166-2	1810013L24Rik (+200066), Grin2a (+964755)
chr16	9280980	9281128	Merged-chr16-9281054-2	1810013L24Rik (+450954), Grin2a (+713867)
chr16	9291441	9291589	Merged-chr16-9291515-2	1810013L24Rik (+461415), Grin2a (+703406)
chr16	10328130	10328278	Merged-chr16-10328204-2	Emp2 (-14236), Tekt5 (+67244)
chr16	10887597	10887745	Merged-chr16-10887671-2	Rmi2 (+52612), Litaf (+105450)
chr16	11176258	11176406	Merged-chr16-11176332-2	Zc3h7a (+61)
chr16	11254133	11254281	Merged-chr16-11254207-2	Gspt1 (+2)
chr16	11360626	11360774	Merged-chr16-11360700-2	Snx29 (-44948), Tnfrsf17 (+46888)
chr16	13428995	13429143	Merged-chr16-13429069-2	Mkl2 (+172588), Parn (+239101)
chr16	13765979	13766127	Merged-chr16-13766053-1	Pla2g10 (-35070), Rrn3 (-14646)
chr16	13818651	13818799	Merged-chr16-13818725-1	Ntan1 (-526)
chr16	13976559	13976707	Merged-chr16-13976633-2	2900011O08Rik (-9971), Mpv17l (+35968)
chr16	14004298	14004446	Merged-chr16-14004372-2	Ifitm7 (-17517), Marf1 (+154902)
chr16	14557280	14557428	Merged-chr16-14557354-1	A630010A05Rik (-22867), Gm1758 (+55254)
chr16	15637877	15638025	Merged-chr16-15637951-2	Mcm4 (-551), Prkdc (+62)
chr16	16213451	16213599	Merged-chr16-16213525-2	Pkp2 (+207)
chr16	16358610	16358758	Merged-chr16-16358684-1	Dnm1l (+346)
chr16	16911976	16912124	Merged-chr16-16912050-2	Mapk1 (-71332), Ppm1f (+15581)
chr16	17208885	17209033	Merged-chr16-17208959-2	Rimbp3 (+824)
chr16	17220263	17220411	Merged-chr16-17220337-2	Hic2 (-13235), Rimbp3 (+12202)
chr16	17276262	17276410	Merged-chr16-17276336-2	Tmem191c (+36)
chr16	17583162	17583310	Merged-chr16-17583236-1	Smpd4 (-36118), Slc7a4 (-6515)
chr16	17757896	17758044	Merged-chr16-17757970-1	Klhl22 (-1651)
chr16	17977612	17977760	Merged-chr16-17977686-2	Vpreb2 (-2879)
chr16	18289003	18289151	Merged-chr16-18289077-1	Dgcr8 (+172)
chr16	18347961	18348109	Merged-chr16-18348035-2	Tango2 (-4108), Arvcf (-239)
chr16	18392811	18392959	Merged-chr16-18392885-2	Comt (+20609), Arvcf (+44611)
chr16	19237903	19238051	Merged-chr16-19237977-2	Iglc2 (-37626), Olfr164 (+48860)
chr16	20522567	20522715	Merged-chr16-20522641-2	Ap2m1 (-12839), Dvl3 (+5659)
chr16	20611451	20611599	Merged-chr16-20611525-2	Alg3 (-757), Ece2 (-85)
chr16	20724627	20724775	Merged-chr16-20724701-2	Chrd (-8426), Polr2h (+7036)
chr16	20837040	20837188	Merged-chr16-20837114-2	Ephb3 (-367641), Thpo (-102603)
chr16	21678999	21679147	Merged-chr16-21679073-2	2510009E07Rik (+15592), Vps8 (+255955)
chr16	22216351	22216499	Merged-chr16-22216425-1	Igf2bp2 (-53126), Tra2b (+49580)
chr16	22239077	22239225	Merged-chr16-22239151-2	Igf2bp2 (-75852), Tra2b (+26854)
chr16	22406059	22406207	Merged-chr16-22406133-2	Tra2b (-140128), Etv5 (+33586)
chr16	22956196	22956344	Merged-chr16-22956270-2	Hrg (+5198), Kng2 (+72831)
chr16	23610061	23610209	Merged-chr16-23610135-2	Rtp4 (+216)
chr16	23983387	23983535	Merged-chr16-23983461-2	Rtp2 (-52674), Bcl6 (+5391)
chr16	24943750	24943898	Merged-chr16-24943824-1	Tprg (-342993), Lpp (+550474)
chr16	26649614	26649762	Merged-chr16-26649688-1	Il1rap (+67984), Gmnc (+340286)
chr16	28753129	28753277	Merged-chr16-28753203-1	Fgf12 (-307976), Mb21d2 (+176495)
chr16	29761976	29762124	Merged-chr16-29762050-2	Hes1 (-303290), Opa1 (+182670)
chr16	29996299	29996447	Merged-chr16-29996373-2	Hes1 (-68967), Opa1 (+416993)
chr16	30050987	30051135	Merged-chr16-30051061-2	Hes1 (-14279), Opa1 (+471681)
chr16	30064106	30064254	Merged-chr16-30064180-1	Hes1 (-1160)
chr16	30066969	30067117	Merged-chr16-30067043-2	Hes1 (+1703), Cpn2 (+200489)
chr16	30069736	30069884	Merged-chr16-30069810-2	Hes1 (+4470), Cpn2 (+197722)
chr16	30255215	30255363	Merged-chr16-30255289-2	Cpn2 (+12243), Hes1 (+189949)
chr16	30641663	30641811	Merged-chr16-30641737-1	Fam43a (+42014), Xxylt1 (+439695)
chr16	31510188	31510336	Merged-chr16-31510262-1	Dlg1 (-153777), Bdh1 (+81514)
chr16	31933166	31933314	Merged-chr16-31933240-2	Pigz (-611)
chr16	31948264	31948412	Merged-chr16-31948338-2	Ncbp2 (-175)
chr16	32117876	32118024	Merged-chr16-32117950-2	Cep19 (+18150), Lrrc33 (+47526)
chr16	32608742	32608890	Merged-chr16-32608816-1	Tfrc (-104)
chr16	33036112	33036260	Merged-chr16-33036186-2	Iqcg (+20004), Lrch3 (+122086)
chr16	33062204	33062352	Merged-chr16-33062278-1	Lmln (-243)
chr16	33517346	33517494	Merged-chr16-33517420-2	Slc12a8 (-909)
chr16	33584911	33585059	Merged-chr16-33584985-2	Heg1 (-99481), Slc12a8 (+66656)
chr16	35156422	35156570	Merged-chr16-35156496-2	Adcy5 (+1619), Sec22a (+207422)
chr16	35490845	35490993	Merged-chr16-35490919-2	Pdia5 (-46)
chr16	35541583	35541731	Merged-chr16-35541657-1	Sema5b (+86)
chr16	35556968	35557116	Merged-chr16-35557042-1	Sema5b (+15471), Dirc2 (+212314)
chr16	35564616	35564764	Merged-chr16-35564690-1	Sema5b (+23119), Dirc2 (+204666)
chr16	35729300	35729448	Merged-chr16-35729374-2	Dirc2 (+39982), Sema5b (+187803)
chr16	35817381	35817529	Merged-chr16-35817455-2	Hspbap1 (+47069), Parp14 (+54089)
chr16	35981654	35981802	Merged-chr16-35981728-1	Kpna1 (-1587)
chr16	36887626	36887774	Merged-chr16-36887700-1	Hcls1 (-47283), Golgb1 (+1566)
chr16	37477200	37477348	Merged-chr16-37477274-1	Stxbp5l (-92351), Gtf2e1 (+62515)
chr16	37584421	37584569	Merged-chr16-37584495-2	Hgd (+4342), Ndufb4 (+69958)
chr16	38522289	38522437	Merged-chr16-38522363-1	Timmdc1 (+300)
chr16	44139787	44139935	Merged-chr16-44139861-2	Atp6v1a (-556), Naa50 (-25)
chr16	50457815	50457963	Merged-chr16-50457889-2	Bbx (-25499), Ccdc54 (+133265)
chr16	52083246	52083394	Merged-chr16-52083320-1	Cblb (+51771), Alcam (+370754)
chr16	52084031	52084179	Merged-chr16-52084105-2	Cblb (+52556), Alcam (+369969)
chr16	57606823	57606971	Merged-chr16-57606897-2	Cmss1 (-72)
chr16	58670475	58670623	Merged-chr16-58670549-1	Cpox (+341)
chr16	62921928	62922076	Merged-chr16-62922002-1	Pros1 (+67695), Epha3 (+942156)
chr16	63213642	63213790	Merged-chr16-63213716-1	Pros1 (+359409), Epha3 (+650442)
chr16	65815163	65815311	Merged-chr16-65815237-2	Vgll3 (-396)
chr16	65815474	65815622	Merged-chr16-65815548-2	Vgll3 (-85)
chr16	67652527	67652675	Merged-chr16-67652601-2	Cadm2 (-31693)
chr16	78294992	78295140	Merged-chr16-78295066-2	Gm11146 (-692972), Cxadr (-6430)
chr16	82596560	82596708	Merged-chr16-82596634-1	NONE
chr16	85528347	85528495	Merged-chr16-85528421-2	App (-354714), Cyyr1 (+21996)
chr16	88701077	88701225	Merged-chr16-88701151-2	Krtap27-1 (-29497), 2310061N02Rik (+6811)
chr16	90082132	90082280	Merged-chr16-90082206-2	Sod1 (-138536), Tiam1 (-107507)
chr16	91423640	91423788	Merged-chr16-91423714-1	Ifnar1 (-61524), Il10rb (+17479)
chr16	91693296	91693444	Merged-chr16-91693370-2	Donson (-4605)
chr16	91693697	91693845	Merged-chr16-91693771-2	Donson (-5006), Cryzl1 (+35204)
chr16	91818519	91818667	Merged-chr16-91818593-2	Itsn1 (+89240), Atp5o (+113094)
chr16	92058181	92058329	Merged-chr16-92058255-2	Slc5a3 (-67), Mrps6 (-15)
chr16	93309084	93309232	Merged-chr16-93309158-2	Runx1 (-483092), Setd4 (+294657)
chr16	93711859	93712007	Merged-chr16-93711933-2	Dopey2 (+26)
chr16	93907268	93907416	Merged-chr16-93907342-1	Chaf1b (+23441), Cldn14 (+101495)
chr16	93907871	93908019	Merged-chr16-93907945-1	Chaf1b (+24044), Cldn14 (+100892)
chr16	93941020	93941168	Merged-chr16-93941094-2	Chaf1b (+57193), Cldn14 (+67743)
chr16	94075788	94075936	Merged-chr16-94075862-2	Cldn14 (-67025), Sim2 (-9398)
chr16	94290388	94290536	Merged-chr16-94290462-1	Hlcs (+23101), Sim2 (+205202)
chr16	94698810	94698958	Merged-chr16-94698884-1	Dyrk1a (+128874), Kcnj6 (+298812)
chr16	94699190	94699338	Merged-chr16-94699264-1	Dyrk1a (+129254), Kcnj6 (+298432)
chr16	95093862	95094010	Merged-chr16-95093936-1	Kcnj15 (-163622), Kcnj6 (-96240)
chr16	95684528	95684676	Merged-chr16-95684602-1	Erg (-154237), Ets2 (-17473)
chr16	97286862	97287010	Merged-chr16-97286936-1	Dscam (-116184), Bace2 (-69792)
chr16	97322743	97322891	Merged-chr16-97322817-1	Dscam (-152065), Bace2 (-33911)
chr16	97488399	97488547	Merged-chr16-97488473-2	Gm9242 (-1574)
chr17	3410422	3410570	Merged-chr17-3410496-2	Cldn20 (-122058), Tiam2 (+83923)
chr17	4996456	4996604	Merged-chr17-4996530-2	Arid1b (+1456), Tmem242 (+443730)
chr17	5143825	5143973	Merged-chr17-5143899-2	Arid1b (+148825), Tmem242 (+296361)
chr17	6476748	6476896	Merged-chr17-6476822-2	Dynlt1b (+46710), Gm2792 (+106296)
chr17	6827882	6828030	Merged-chr17-6827956-2	Ezr (-45172), Rsph3b (+120400)
chr17	7187107	7187255	Merged-chr17-7187181-2	Tcp10a (-137486), Rps6ka2 (+17066)
chr17	7906725	7906873	Merged-chr17-7906799-2	Fndc1 (-101825), Tagap (-19201)
chr17	8205294	8205442	Merged-chr17-8205368-2	Ccr6 (-37158), Fgfr1op (+39867)
chr17	8347009	8347157	Merged-chr17-8347083-2	T (-87340), Prr18 (+6677)
chr17	9917221	9917369	Merged-chr17-9917295-2	Pabpc6 (-247591), Qk (+402066)
chr17	11185241	11185389	Merged-chr17-11185315-1	Park2 (-653287), Park2 (+118190)
chr17	12195307	12195455	Merged-chr17-12195381-1	Map3k4 (-37100), Agpat4 (+76097)
chr17	12370450	12370598	Merged-chr17-12370524-2	Map3k4 (-51864), Plg (-8085)
chr17	12992513	12992661	Merged-chr17-12992587-1	Wtap (-90)
chr17	13732775	13732923	Merged-chr17-13732849-1	Mllt4 (-27699), Smok4a (+211393)
chr17	14818142	14818290	Merged-chr17-14818216-2	Thbs2 (-123954), Wdr27 (+116437)
chr17	15093651	15093799	Merged-chr17-15093725-2	2210404J11Rik (+52084), Dll1 (+282251)
chr17	15248097	15248245	Merged-chr17-15248171-2	Dll1 (+127805), 2210404J11Rik (+206530)
chr17	15295469	15295617	Merged-chr17-15295543-1	Dll1 (+80433), 2210404J11Rik (+253902)
chr17	15371960	15372108	Merged-chr17-15372034-2	Dll1 (+3942), 2210404J11Rik (+330393)
chr17	15376995	15377143	Merged-chr17-15377069-1	Dll1 (-1093)
chr17	15380634	15380782	Merged-chr17-15380708-2	Dll1 (-4732)
chr17	15990336	15990484	Merged-chr17-15990410-2	BC002059 (-982500), Rgmb (-163824)
chr17	16218696	16218844	Merged-chr17-16218770-2	BC002059 (-754140), Rgmb (-392184)
chr17	17005308	17005456	Merged-chr17-17005382-1	Zfp960 (-58731), BC002059 (+32472)
chr17	17624962	17625110	Merged-chr17-17625036-2	Lnpep (-547)
chr17	17739988	17740136	Merged-chr17-17740062-2	Ncrna00085 (-90942), Vmn2r90 (+36121)
chr17	23576009	23576157	Merged-chr17-23576083-2	Zfp213 (-11857), Zfp13 (+23404)
chr17	23598962	23599110	Merged-chr17-23599036-2	Zscan10 (-1820), Zfp13 (+451)
chr17	23610644	23610792	Merged-chr17-23610718-2	Zscan10 (+9862), Mmp25 (+34551)
chr17	23722844	23722992	Merged-chr17-23722918-2	Pkmyt1 (-3418)
chr17	23790490	23790638	Merged-chr17-23790564-2	Flywch2 (-4483)
chr17	23803454	23803602	Merged-chr17-23803528-1	Srrm2 (+341)
chr17	23968942	23969090	Merged-chr17-23969016-2	Sbpl (-14097), Prss30 (+6214)
chr17	24046088	24046236	Merged-chr17-24046162-1	Prss27 (+8018), Kctd5 (+27323)
chr17	24251235	24251383	Merged-chr17-24251309-1	Ccnf (+100)
chr17	24351934	24352082	Merged-chr17-24352008-2	Abca17 (-979), Abca3 (-15)
chr17	24455013	24455161	Merged-chr17-24455087-1	E4f1 (+224)
chr17	24550068	24550216	Merged-chr17-24550142-2	Pkd1 (+192)
chr17	24632534	24632682	Merged-chr17-24632608-2	Nthl1 (-74), Tsc2 (+21)
chr17	24697994	24698142	Merged-chr17-24698068-1	Gfer (-1912), Noxo1 (+1834)
chr17	24707583	24707731	Merged-chr17-24707657-1	Tbl3 (+3)
chr17	24769245	24769393	Merged-chr17-24769319-1	Meiob (-35063), Hs3st6 (+16316)
chr17	24936571	24936719	Merged-chr17-24936645-1	Mapk8ip3 (+323)
chr17	25109445	25109593	Merged-chr17-25109519-2	Tmem204 (-28338), Telo2 (+6448)
chr17	26442451	26442599	Merged-chr17-26442525-2	Neurl1b (+27560), Dusp1 (+65994)
chr17	27037148	27037296	Merged-chr17-27037222-2	Itpr3 (-20082), Bak1 (-8213)
chr17	27041455	27041603	Merged-chr17-27041529-2	Itpr3 (-15775), Bak1 (-12520)
chr17	27087602	27087750	Merged-chr17-27087676-1	Itpr3 (+30372), Mnf1 (+46240)
chr17	27099845	27099993	Merged-chr17-27099919-2	Mnf1 (+33997), Itpr3 (+42615)
chr17	27100304	27100452	Merged-chr17-27100378-2	Mnf1 (+33538), Itpr3 (+43074)
chr17	27186231	27186379	Merged-chr17-27186305-2	Ip6k3 (-18541), Lemd2 (+18133)
chr17	27324524	27324672	Merged-chr17-27324598-1	Lemd2 (-120160), Grm4 (+178706)
chr17	27329904	27330052	Merged-chr17-27329978-2	Lemd2 (-125540), Grm4 (+173326)
chr17	27556415	27556563	Merged-chr17-27556489-2	Hmga1 (-131)
chr17	27761837	27761985	Merged-chr17-27761911-1	Spdef (-32961), D17Wsu92e (+58647)
chr17	28061664	28061812	Merged-chr17-28061738-1	Tcp11 (+18846), Anks1 (+152398)
chr17	28150129	28150277	Merged-chr17-28150203-2	Zfp523 (-27215), Scube3 (+7887)
chr17	28154104	28154252	Merged-chr17-28154178-2	Zfp523 (-23240), Scube3 (+11862)
chr17	28207666	28207814	Merged-chr17-28207740-2	Def6 (-38)
chr17	28224094	28224242	Merged-chr17-28224168-2	Ppard (-8586), Def6 (+16390)
chr17	28226176	28226324	Merged-chr17-28226250-1	Ppard (-6504), Def6 (+18472)
chr17	28232488	28232636	Merged-chr17-28232562-1	Ppard (-192)
chr17	28345907	28346055	Merged-chr17-28345981-2	Tead3 (+4619), Rpl10a (+17510)
chr17	28388648	28388796	Merged-chr17-28388722-2	Tulp1 (-23574), Fkbp5 (+128802)
chr17	28485543	28485691	Merged-chr17-28485617-2	Tulp1 (-120469), Fkbp5 (+31907)
chr17	28594065	28594213	Merged-chr17-28594139-2	Lhfpl5 (+18421), Srpk1 (+28382)
chr17	28777839	28777987	Merged-chr17-28777913-1	Brpf3 (-23177), Mapk13 (+8606)
chr17	28834905	28835053	Merged-chr17-28834979-1	Pnpla1 (-23432), Brpf3 (+33889)
chr17	29056833	29056981	Merged-chr17-29056907-2	Cdkn1a (-36865), Srsf3 (+24234)
chr17	29081360	29081508	Merged-chr17-29081434-2	Cdkn1a (-12338), Srsf3 (+48761)
chr17	29093736	29093884	Merged-chr17-29093810-1	Cdkn1a (+38)
chr17	29415956	29416104	Merged-chr17-29416030-2	Pim1 (-74782), Fgd2 (+55088)
chr17	29469152	29469300	Merged-chr17-29469226-2	Pim1 (-21586), Fgd2 (+108284)
chr17	29617202	29617350	Merged-chr17-29617276-2	Ftsjd2 (-43319), Rnf8 (+2486)
chr17	29627123	29627271	Merged-chr17-29627197-2	Ftsjd2 (-33398), Rnf8 (+12407)
chr17	29855048	29855196	Merged-chr17-29855122-2	Ccdc167 (-138113), Mdga1 (+32760)
chr17	30378412	30378560	Merged-chr17-30378486-2	Gm9874 (-107025), Zfand3 (+373399)
chr17	30533156	30533304	Merged-chr17-30533230-1	Btbd9 (+43057), Gm9874 (+47719)
chr17	30576405	30576553	Merged-chr17-30576479-1	Btbd9 (-192)
chr17	31073416	31073564	Merged-chr17-31073490-1	Abcg1 (+15792), Tff3 (+56156)
chr17	31264540	31264688	Merged-chr17-31264614-1	Rsph1 (+12742), Ubash3a (+56741)
chr17	31307866	31308014	Merged-chr17-31307940-2	Pde9a (-78294), Slc37a1 (+11721)
chr17	31328585	31328733	Merged-chr17-31328659-2	Pde9a (-57575), Slc37a1 (+32440)
chr17	31422155	31422303	Merged-chr17-31422229-2	Pde9a (+35995), Wdr4 (+90522)
chr17	31479180	31479328	Merged-chr17-31479254-2	Wdr4 (+33497), Pde9a (+93020)
chr17	31789092	31789240	Merged-chr17-31789166-1	Sik1 (+66626), Cryaa (+111233)
chr17	31790925	31791073	Merged-chr17-31790999-1	Sik1 (+64793), Cryaa (+113066)
chr17	32073464	32073612	Merged-chr17-32073538-2	Rrp1b (+37438), Notch3 (+93342)
chr17	33718585	33718733	Merged-chr17-33718659-1	March2 (-14)
chr17	33817650	33817798	Merged-chr17-33817724-1	Rps28 (+6768), Kank3 (+7204)
chr17	33951237	33951385	Merged-chr17-33951311-2	Vps52 (-4501), B3galt4 (+177)
chr17	33951601	33951749	Merged-chr17-33951675-2	Vps52 (-4137), B3galt4 (-187)
chr17	34067780	34067928	Merged-chr17-34067854-2	H2-Oa (-24486), Col11a2 (+28417)
chr17	34388094	34388242	Merged-chr17-34388168-2	BC051142 (-10653), Btnl1 (+11036)
chr17	34593914	34594062	Merged-chr17-34593988-2	Ager (-3874)
chr17	34651615	34651763	Merged-chr17-34651689-1	Tnxb (-18846), Atf6b (+4509)
chr17	34981663	34981811	Merged-chr17-34981737-2	Lsm2 (-392)
chr17	35059607	35059755	Merged-chr17-35059681-1	Ddah2 (+646)
chr17	35509323	35509471	Merged-chr17-35509397-1	Pou5f1 (+3360), Tcf19 (+7388)
chr17	35697775	35697923	Merged-chr17-35697849-2	Gtf2h4 (-24110), Ddr1 (+6750)
chr17	35703979	35704127	Merged-chr17-35704053-2	Ddr1 (+546)
chr17	35824521	35824669	Merged-chr17-35824595-1	Flot1 (+1365), Tubb5 (+13711)
chr17	35829862	35830010	Merged-chr17-35829936-1	Flot1 (+6706), Tubb5 (+8370)
chr17	35835707	35835855	Merged-chr17-35835781-1	Tubb5 (+2525), Flot1 (+12551)
chr17	35837494	35837642	Merged-chr17-35837568-2	Mdc1 (-3947), Tubb5 (+738)
chr17	35865734	35865882	Merged-chr17-35865808-1	Ppp1r18 (-852)
chr17	35897678	35897826	Merged-chr17-35897752-1	2310061I04Rik (-321)
chr17	35980117	35980265	Merged-chr17-35980191-2	Prr3 (+45), Gnl1 (+340)
chr17	36271395	36271543	Merged-chr17-36271469-1	Trim39 (+98)
chr17	36355472	36355620	Merged-chr17-36355546-2	H2-M10.1 (-29391), H2-M10.3 (+12871)
chr17	36788878	36789026	Merged-chr17-36788952-1	H2-M10.6 (-23219), H2-M10.5 (+16042)
chr17	37028968	37029116	Merged-chr17-37029042-1	Gabbr1 (-16924), Mog (-5644)
chr17	42876680	42876828	Merged-chr17-42876754-1	Cd2ap (-330)
chr17	44105809	44105957	Merged-chr17-44105883-2	Enpp4 (-74)
chr17	45564418	45564566	Merged-chr17-45564492-2	Slc35b2 (+528)
chr17	45567290	45567438	Merged-chr17-45567364-2	Slc35b2 (+3400), Hsp90ab1 (+5907)
chr17	45602127	45602275	Merged-chr17-45602201-2	Gm7325 (-286)
chr17	45616201	45616349	Merged-chr17-45616275-1	Gm7325 (-14360), Capn11 (+43050)
chr17	45629570	45629718	Merged-chr17-45629644-2	Gm7325 (-27729), Capn11 (+29681)
chr17	45685694	45685842	Merged-chr17-45685768-1	Mrpl14 (-554), Tmem63b (+491)
chr17	46093271	46093419	Merged-chr17-46093345-2	Vegfa (-60976), Mrps18a (-17641)
chr17	46254267	46254415	Merged-chr17-46254341-2	Lrrc73 (+176)
chr17	46555799	46555947	Merged-chr17-46555873-1	Srf (+289)
chr17	46651211	46651359	Merged-chr17-46651285-2	Cul7 (+948)
chr17	46852625	46852773	Merged-chr17-46852699-1	Gltscr1l (-21286), A330017A19Rik (+37706)
chr17	46857149	46857297	Merged-chr17-46857223-2	Gltscr1l (-25810), A330017A19Rik (+33182)
chr17	46886369	46886517	Merged-chr17-46886443-1	Tbcc (-4178), A330017A19Rik (+3962)
chr17	47511357	47511505	Merged-chr17-47511431-2	Ccnd3 (+6380), Bysl (+100061)
chr17	47521750	47521898	Merged-chr17-47521824-2	Ccnd3 (+16773), Bysl (+89668)
chr17	47672558	47672706	Merged-chr17-47672632-2	Tomm6 (+15551), Usp49 (+41942)
chr17	47711963	47712111	Merged-chr17-47712037-2	Pgc (-14805), Frs3 (+16839)
chr17	47739825	47739973	Merged-chr17-47739899-2	Tfeb (-45821), Pgc (+13057)
chr17	47976795	47976943	Merged-chr17-47976869-2	Foxp4 (-52434), 1700122O11Rik (+61424)
chr17	48101010	48101158	Merged-chr17-48101084-2	1700067P10Rik (+11452), 9830107B12Rik (+45223)
chr17	48610967	48611115	Merged-chr17-48611041-2	Lrfn2 (-321338), Unc5cl (+156140)
chr17	49291065	49291213	Merged-chr17-49291139-2	Mocs1 (-137271), Lrfn2 (+358760)
chr17	49368384	49368532	Merged-chr17-49368458-1	Mocs1 (-59952), Lrfn2 (+436079)
chr17	49717752	49717900	Merged-chr17-49717826-2	Kif6 (+102654), Rftn1 (+472848)
chr17	49890025	49890173	Merged-chr17-49890099-2	Kif6 (+274927), Rftn1 (+300575)
chr17	50032088	50032236	Merged-chr17-50032162-2	Rftn1 (+158512), Kif6 (+416990)
chr17	52601370	52601518	Merged-chr17-52601444-2	Kcnh8 (-1319)
chr17	53490456	53490604	Merged-chr17-53490530-2	Rab5a (+11296), Pp2d1 (+48921)
chr17	55954382	55954530	Merged-chr17-55954456-1	Ccdc94 (-4731)
chr17	56194871	56195019	Merged-chr17-56194945-1	D17Wsu104e (-11025), Dpp9 (+23944)
chr17	56511764	56511912	Merged-chr17-56511838-1	Znrf4 (+645)
chr17	56673380	56673528	Merged-chr17-56673454-1	Ranbp3 (+229)
chr17	56762169	56762317	Merged-chr17-56762243-1	Nrtn (-4713), Dus3l (-2508)
chr17	57273996	57274144	Merged-chr17-57274070-1	Vav1 (-5030), Trip10 (+24619)
chr17	64876270	64876418	Merged-chr17-64876344-2	4930583I09Rik (-40273), Tmem232 (+664432)
chr17	65370166	65370314	Merged-chr17-65370240-1	4930583I09Rik (-534169), Tmem232 (+170536)
chr17	65648856	65649004	Merged-chr17-65648930-1	Txndc2 (-6726), Rab31 (+123822)
chr17	65702361	65702509	Merged-chr17-65702435-1	Txndc2 (-60231), Rab31 (+70317)
chr17	65872818	65872966	Merged-chr17-65872892-2	Ralbp1 (+12863), Ppp4r1 (+89537)
chr17	66479840	66479988	Merged-chr17-66479914-2	Soga2 (-30164), Rab12 (+39756)
chr17	66545977	66546125	Merged-chr17-66546051-2	Rab12 (-26381), Themis3 (+48570)
chr17	66546479	66546627	Merged-chr17-66546553-2	Rab12 (-26883), Themis3 (+48068)
chr17	66720706	66720854	Merged-chr17-66720780-1	Themis3 (-126159), Ptprm (+633679)
chr17	68937678	68937826	Merged-chr17-68937752-1	Epb4.1l3 (-219058), Tmem200c (+100616)
chr17	70834601	70834749	Merged-chr17-70834675-1	Tgif1 (+17059), Dlgap1 (+409881)
chr17	70851586	70851734	Merged-chr17-70851660-1	Tgif1 (+74)
chr17	70900840	70900988	Merged-chr17-70900914-1	Tgif1 (-49180), Gm16519 (-28144)
chr17	71475607	71475755	Merged-chr17-71475681-1	Smchd1 (-338)
chr17	71598733	71598881	Merged-chr17-71598807-1	Wdr43 (-17408), Spdya (+46746)
chr17	72603232	72603380	Merged-chr17-72603306-1	Alk (+403)
chr17	72836157	72836305	Merged-chr17-72836231-1	Ypel5 (-473)
chr17	73054324	73054472	Merged-chr17-73054398-1	Lclat1 (-53596), Lbh (+136093)
chr17	73487961	73488109	Merged-chr17-73488035-2	Capn13 (-88739), Galnt14 (+222416)
chr17	74994019	74994167	Merged-chr17-74994093-1	Ltbp1 (-11475), Ttc27 (+276343)
chr17	75463468	75463616	Merged-chr17-75463542-2	Rasgrp3 (+27637), Fam98a (+88404)
chr17	75551821	75551969	Merged-chr17-75551895-1	Fam98a (+51)
chr17	79355710	79355858	Merged-chr17-79355784-1	Cdc42ep3 (-693)
chr17	79713973	79714121	Merged-chr17-79714047-1	Cyp1b1 (+994)
chr17	79982764	79982912	Merged-chr17-79982838-2	Atl2 (-86810), Hnrpll (+79496)
chr17	80517315	80517463	Merged-chr17-80517389-2	Sos1 (-36936), Cdkl4 (+46445)
chr17	83324059	83324207	Merged-chr17-83324133-2	Eml4 (-26798), Pkdcc (+108841)
chr17	83954656	83954804	Merged-chr17-83954730-2	Haao (-107940), Zfp36l2 (+233217)
chr17	83956019	83956167	Merged-chr17-83956093-2	Haao (-109303), Zfp36l2 (+231854)
chr17	84186912	84187060	Merged-chr17-84186986-2	Zfp36l2 (+961)
chr17	85645788	85645936	Merged-chr17-85645862-2	Six3 (+24948), Six2 (+42412)
chr17	87072297	87072445	Merged-chr17-87072371-2	Gm5499 (-5892), Cript (+46821)
chr17	87193553	87193701	Merged-chr17-87193627-2	Mcfd2 (+72277), Socs5 (+85948)
chr17	87272702	87272850	Merged-chr17-87272776-2	Ttc7 (-10110), Mcfd2 (-6872)
chr17	87282815	87282963	Merged-chr17-87282889-2	Ttc7 (+3)
chr17	87446022	87446170	Merged-chr17-87446096-2	Calm2 (+839)
chr17	88440713	88440861	Merged-chr17-88440787-2	Foxn2 (+76)
chr17	88707923	88708071	Merged-chr17-88707997-2	Gtf2a1l (+39337), Lhcgr (+83979)
chr17	89934086	89934234	Merged-chr17-89934160-2	Gm10184 (-23711)
chr18	4321037	4321185	Merged-chr18-4321111-1	Map3k8 (+31842), Lyzl1 (+155279)
chr18	4417187	4417335	Merged-chr18-4417261-2	9430020K01Rik (-217668), Mtpap (+41669)
chr18	4980411	4980559	Merged-chr18-4980485-2	Svil (+59945), Zfp438 (+353954)
chr18	5163415	5163563	Merged-chr18-5163489-2	Zfp438 (+170950), Svil (+242949)
chr18	6280678	6280826	Merged-chr18-6280752-2	Rpl27-ps3 (-51838), Kif5b (-39229)
chr18	9865820	9865968	Merged-chr18-9865894-1	Gm17430 (-139224), Thoc1 (-92286)
chr18	10609789	10609937	Merged-chr18-10609863-1	Esco1 (+489)
chr18	10610264	10610412	Merged-chr18-10610338-1	Esco1 (+14)
chr18	11892357	11892505	Merged-chr18-11892431-2	Cables1 (+53211), Tmem241 (+229049)
chr18	12234794	12234942	Merged-chr18-12234868-1	Npc1 (+1532), Riok3 (+106018)
chr18	20553213	20553361	Merged-chr18-20553287-1	Dsg2 (-4787)
chr18	20950382	20950530	Merged-chr18-20950456-1	Rnf138 (-50885), Rnf125 (+5831)
chr18	22649472	22649620	Merged-chr18-22649546-2	Asxl3 (+304457), Nol4 (+389110)
chr18	23041813	23041961	Merged-chr18-23041887-2	Nol4 (-3231)
chr18	23916839	23916987	Merged-chr18-23916913-2	Zfp397 (-37775), Mapre2 (+112929)
chr18	24132996	24133144	Merged-chr18-24133070-2	Galnt1 (-72697), Ino80c (-11117)
chr18	25423750	25423898	Merged-chr18-25423824-2	AW554918 (+254804), Celf4 (+330159)
chr18	31568885	31569033	Merged-chr18-31568959-1	Syt4 (-121544), B930094E09Rik (-40553)
chr18	31910848	31910996	Merged-chr18-31910922-1	Sft2d3 (+981)
chr18	33950608	33950756	Merged-chr18-33950682-2	Epb4.1l4a (+56524), Gm10549 (+486519)
chr18	34535769	34535917	Merged-chr18-34535843-1	Fam13b (-29020), Wnt8a (-6470)
chr18	34551888	34552036	Merged-chr18-34551962-2	Wnt8a (+9649), Nme5 (+27153)
chr18	34777113	34777261	Merged-chr18-34777187-2	Kdm3b (+179)
chr18	34954150	34954298	Merged-chr18-34954224-2	Hspa9 (+133)
chr18	35022520	35022668	Merged-chr18-35022594-2	Ctnna1 (-96294), Hspa9 (-68237)
chr18	35098762	35098910	Merged-chr18-35098836-2	Hspa9 (-144479), Ctnna1 (-20052)
chr18	35757805	35757953	Merged-chr18-35757879-2	Tmem173 (-17325), Gm16490 (-12439)
chr18	35815593	35815741	Merged-chr18-35815667-2	Cxxc5 (-14151), Ube2d2a (+44108)
chr18	35857253	35857401	Merged-chr18-35857327-2	Psd2 (-107503), Cxxc5 (+27509)
chr18	35887687	35887835	Merged-chr18-35887761-1	Psd2 (-77069), Cxxc5 (+57943)
chr18	35888521	35888669	Merged-chr18-35888595-1	Psd2 (-76235), Cxxc5 (+58777)
chr18	36328617	36328765	Merged-chr18-36328691-2	Cystm1 (-20083), Pura (+47594)
chr18	36415747	36415895	Merged-chr18-36415821-2	Pfdn1 (+38674), Cystm1 (+67047)
chr18	37880125	37880273	Merged-chr18-37880199-2	Diap1 (+55277), Pcdhga11 (+60653)
chr18	38601596	38601744	Merged-chr18-38601670-2	Spry4 (-402), 9630014M24Rik (+136)
chr18	38631984	38632132	Merged-chr18-38632058-2	9630014M24Rik (+30524), Fgf1 (+286713)
chr18	42899385	42899533	Merged-chr18-42899459-2	Gpr151 (-319807), Ppp2r2b (+160012)
chr18	42975909	42976057	Merged-chr18-42975983-1	Gpr151 (-396331), Ppp2r2b (+83488)
chr18	43687753	43687901	Merged-chr18-43687827-2	Jakmip2 (-54)
chr18	44643967	44644115	Merged-chr18-44644041-1	Mcc (+168141), Dcp2 (+263541)
chr18	45559767	45559915	Merged-chr18-45559841-1	1700018A14Rik (-639180), Kcnn2 (+290836)
chr18	46525718	46525866	Merged-chr18-46525792-2	Fem1c (+179)
chr18	46878758	46878906	Merged-chr18-46878832-1	Arl14epl (-47150), 4833403I15Rik (+28793)
chr18	46879083	46879231	Merged-chr18-46879157-2	Arl14epl (-46825), 4833403I15Rik (+29118)
chr18	49755297	49755445	Merged-chr18-49755371-2	Dtwd2 (+230)
chr18	49832633	49832781	Merged-chr18-49832707-2	Dmxl1 (-290)
chr18	54576787	54576935	Merged-chr18-54576861-2	Zfp608 (+413319), Csnk1g3 (+714748)
chr18	56720239	56720387	Merged-chr18-56720313-2	Lmnb1 (+12500), March3 (+205235)
chr18	57239546	57239694	Merged-chr18-57239620-2	Prrc1 (-115113), Megf10 (+106530)
chr18	60493602	60493750	Merged-chr18-60493676-2	Smim3 (+8307), Iigp1 (+117647)
chr18	61536455	61536603	Merged-chr18-61536529-1	Arhgef37 (+7)
chr18	61698003	61698151	Merged-chr18-61698077-1	Pcyox1l (+9558), Il17b (+10142)
chr18	63907532	63907680	Merged-chr18-63907606-2	St8sia3 (-346753), Wdr7 (+198911)
chr18	65497701	65497849	Merged-chr18-65497775-2	Zfp532 (-82455), Malt1 (+66812)
chr18	65565792	65565940	Merged-chr18-65565866-1	Zfp532 (-14364), Malt1 (+134903)
chr18	65606425	65606573	Merged-chr18-65606499-2	Oacyl (-91769), Zfp532 (+26269)
chr18	65925180	65925328	Merged-chr18-65925254-2	Rax (+13835), Grp (+52434)
chr18	65965198	65965346	Merged-chr18-65965272-1	Rax (-26183), Cplx4 (+4906)
chr18	67329311	67329459	Merged-chr18-67329385-1	Cidea (-14179), Impa2 (+40132)
chr18	67330342	67330490	Merged-chr18-67330416-2	Cidea (-13148), Impa2 (+41163)
chr18	67348274	67348422	Merged-chr18-67348348-2	Tubb6 (-42369), Cidea (+4784)
chr18	67610745	67610893	Merged-chr18-67610819-2	Cep76 (+30517), Gm17669 (+48432)
chr18	68235135	68235283	Merged-chr18-68235209-2	Fam210a (+65124), Ldlrad4 (+301952)
chr18	70411116	70411264	Merged-chr18-70411190-1	Rab27b (-269585), Stard6 (-61264)
chr18	70599816	70599964	Merged-chr18-70599890-2	Mbd2 (+31701)
chr18	73225007	73225155	Merged-chr18-73225081-2	Dcc (-874012), Mex3c (-347963)
chr18	74065032	74065180	Merged-chr18-74065106-1	Mapk4 (-177), Gm9925 (+4)
chr18	74391590	74391738	Merged-chr18-74391664-2	Myo5b (-50873), Ccdc11 (+108574)
chr18	74827085	74827233	Merged-chr18-74827159-2	Acaa2 (+47962), Lipg (+134104)
chr18	75306563	75306711	Merged-chr18-75306637-2	Smad7 (-60892), Dym (+287865)
chr18	75607237	75607385	Merged-chr18-75607311-2	Ctif (+90385), Smad7 (+239782)
chr18	76171636	76171784	Merged-chr18-76171710-2	Smad2 (-69870), Zbtb7c (+351532)
chr18	76378926	76379074	Merged-chr18-76379000-1	Skor2 (-477405), Smad2 (+137420)
chr18	76657828	76657976	Merged-chr18-76657902-2	Skor2 (-198503), Smad2 (+416322)
chr18	77555550	77555698	Merged-chr18-77555624-2	Rnf165 (+9512), Loxhd1 (+273666)
chr18	77565226	77565374	Merged-chr18-77565300-2	Rnf165 (-164)
chr18	81042297	81042445	Merged-chr18-81042371-2	Sall3 (-55793)
chr18	81252025	81252173	Merged-chr18-81252099-1	Sall3 (-265521)
chr18	81401437	81401585	Merged-chr18-81401511-2	Sall3 (-414933)
chr18	81669204	81669352	Merged-chr18-81669278-2	Sall3 (-682700), Galr1 (+737499)
chr18	82477397	82477545	Merged-chr18-82477471-2	Mbp (+2309), Zfp236 (+215412)
chr18	82953004	82953152	Merged-chr18-82953078-2	Zfp516 (+42199)
chr18	83256013	83256161	Merged-chr18-83256087-2	Zfp516 (+345208), Tshz1 (+830317)
chr18	83543822	83543970	Merged-chr18-83543896-1	Tshz1 (+542508), Zfp516 (+633017)
chr18	85299658	85299806	Merged-chr18-85299732-2	Timm21 (-348208)
chr19	3451832	3451980	Merged-chr19-3451906-2	Gal (-37434), Ppp6r3 (+123843)
chr19	3767663	3767811	Merged-chr19-3767737-2	Suv420h1 (+316)
chr19	3930446	3930594	Merged-chr19-3930520-2	Unc93b1 (-4666), Aldh3b1 (-759)
chr19	4046102	4046250	Merged-chr19-4046176-2	Gstp2 (-4011)
chr19	4056282	4056430	Merged-chr19-4056356-2	Gstp2 (-14191), BC021614 (+2939)
chr19	4121134	4121282	Merged-chr19-4121208-1	Aip (+4650), Pitpnm1 (+20586)
chr19	4169551	4169699	Merged-chr19-4169625-2	Rps6kb2 (-6271), Carns1 (+5854)
chr19	4329064	4329212	Merged-chr19-4329138-2	Adrbk1 (-23183), Kdm2a (+67939)
chr19	4510420	4510568	Merged-chr19-4510494-2	Pcx (+22)
chr19	5224744	5224892	Merged-chr19-5224818-2	Klc2 (-106258), Pacs1 (+48301)
chr19	5394298	5394446	Merged-chr19-5394372-2	Tsga10ip (+29)
chr19	5488938	5489086	Merged-chr19-5489012-1	Cfl1 (-1473), Mus81 (-610)
chr19	5568037	5568185	Merged-chr19-5568111-1	Ap5b1 (+37)
chr19	5637567	5637715	Merged-chr19-5637641-2	Rela (+158)
chr19	5696000	5696148	Merged-chr19-5696074-1	Kcnk7 (-8293), Map3k11 (+6943)
chr19	5810750	5810898	Merged-chr19-5810824-1	Scyl1 (-39423), Frmd8 (+64450)
chr19	5846542	5846690	Merged-chr19-5846616-2	Scyl1 (-75215), Frmd8 (+28658)
chr19	6322065	6322213	Merged-chr19-6322139-2	Men1 (-12840), Cdc42bpg (+15683)
chr19	6976147	6976295	Merged-chr19-6976221-2	Ppp1r14b (+1173), Fkbp2 (+4219)
chr19	6979463	6979611	Merged-chr19-6979537-2	Fkbp2 (+903)
chr19	7056825	7056973	Merged-chr19-7056899-2	Macrod1 (+131)
chr19	7066677	7066825	Merged-chr19-7066751-1	Macrod1 (+9983), Flrt1 (+38978)
chr19	7266035	7266183	Merged-chr19-7266109-2	Rcor2 (-3655)
chr19	7268129	7268277	Merged-chr19-7268203-2	Rcor2 (-1561)
chr19	9066373	9066521	Merged-chr19-9066447-2	Scgb1a1 (+21511), Ahnak (+77163)
chr19	10072053	10072201	Merged-chr19-10072127-2	Fads2 (+29376), Fads3 (+30579)
chr19	10198869	10199017	Merged-chr19-10198943-2	Tmem258 (-5071), Fads1 (+16055)
chr19	10362396	10362544	Merged-chr19-10362470-2	Dagla (-57593), Syt7 (-26620)
chr19	10457165	10457313	Merged-chr19-10457239-2	Lrrc10b (+208)
chr19	11299173	11299321	Merged-chr19-11299247-2	Ms4a5 (-15434), Ms4a7 (+36897)
chr19	11299696	11299844	Merged-chr19-11299770-2	Ms4a5 (-15957), Ms4a7 (+36374)
chr19	11912298	11912446	Merged-chr19-11912372-2	Patl1 (-27)
chr19	12794872	12795020	Merged-chr19-12794946-2	Lpxn (-3660), Zfp91 (+1180)
chr19	14835800	14835948	Merged-chr19-14835874-2	Tle4 (-237891)
chr19	16599021	16599169	Merged-chr19-16599095-2	Gna14 (+163428), Vps13a (+181727)
chr19	21778090	21778238	Merged-chr19-21778164-2	Tmem2 (-178)
chr19	21816316	21816464	Merged-chr19-21816390-2	Trpm3 (-322729), Tmem2 (+38048)
chr19	22887143	22887291	Merged-chr19-22887217-2	Klf9 (-254009), Trpm3 (+748098)
chr19	23133880	23134028	Merged-chr19-23133954-2	Klf9 (-7272), Trpm3 (+994835)
chr19	23162503	23162651	Merged-chr19-23162577-1	Klf9 (+21351), Smc5 (+111320)
chr19	24092155	24092303	Merged-chr19-24092229-1	1700021P04Rik (+27436), Tjp2 (+132797)
chr19	24225036	24225184	Merged-chr19-24225110-2	Tjp2 (-84)
chr19	25489104	25489252	Merged-chr19-25489178-2	Dmrt1 (-16440), Kank1 (+252203)
chr19	25610502	25610650	Merged-chr19-25610576-2	Dmrt3 (+39)
chr19	25610965	25611113	Merged-chr19-25611039-2	Dmrt3 (+502)
chr19	25646964	25647112	Merged-chr19-25647038-2	Dmrt2 (-25382), Dmrt3 (+36501)
chr19	27216854	27217002	Merged-chr19-27216928-2	Vldlr (-429)
chr19	28680142	28680290	Merged-chr19-28680216-2	Glis3 (-139)
chr19	29325284	29325432	Merged-chr19-29325358-2	Insl6 (-2)
chr19	29655239	29655387	Merged-chr19-29655313-2	Mlana (-42608), Ermp1 (-6898)
chr19	29999369	29999517	Merged-chr19-29999443-1	Trpd52l3 (-4347)
chr19	30175014	30175162	Merged-chr19-30175088-1	Gldc (+330)
chr19	31255922	31256070	Merged-chr19-31255996-2	Cstf2t (+173155), Prkg1 (+408374)
chr19	31461135	31461283	Merged-chr19-31461209-2	Prkg1 (+203161), Cstf2t (+378368)
chr19	32712685	32712833	Merged-chr19-32712759-1	Atad1 (-461)
chr19	36398506	36398654	Merged-chr19-36398580-2	Ankrd1 (-278736), Pcgf5 (-11168)
chr19	36945123	36945271	Merged-chr19-36945197-1	Btaf1 (+19118), Cpeb3 (+262265)
chr19	37207582	37207730	Merged-chr19-37207656-2	Cpeb3 (-194), March5 (+113)
chr19	38060220	38060368	Merged-chr19-38060294-2	Ffar4 (-36785), Cep55 (+5252)
chr19	38395987	38396135	Merged-chr19-38396061-1	Slc35g1 (+81)
chr19	40271432	40271580	Merged-chr19-40271506-2	Pdlim1 (+110)
chr19	41013696	41013844	Merged-chr19-41013770-1	Blnk (-19235), Dntt (-15505)
chr19	42147687	42147835	Merged-chr19-42147761-2	Marveld1 (+361)
chr19	42795393	42795541	Merged-chr19-42795467-1	Hps1 (-15489), Hpse2 (+592844)
chr19	43441203	43441351	Merged-chr19-43441277-2	Cnnm1 (+841)
chr19	43469488	43469636	Merged-chr19-43469562-2	Cnnm1 (+29126), Got1 (+55043)
chr19	43674621	43674769	Merged-chr19-43674695-2	Slc25a28 (+186)
chr19	45024752	45024900	Merged-chr19-45024826-2	Lzts2 (+9650), Pdzd7 (+21788)
chr19	45026289	45026437	Merged-chr19-45026363-2	Lzts2 (+11187), Pdzd7 (+20251)
chr19	45541759	45541907	Merged-chr19-45541833-2	Poll (+18698), Btrc (+178099)
chr19	45560141	45560289	Merged-chr19-45560215-2	Dpcd (-400), Poll (+316)
chr19	46328670	46328818	Merged-chr19-46328744-1	Psd (-1588), Fbxl15 (+560)
chr19	46349015	46349163	Merged-chr19-46349089-1	Cuedc2 (-10429), Tmem180 (-7791)
chr19	46373784	46373932	Merged-chr19-46373858-2	Tmem180 (+16978), Actr1a (+21877)
chr19	46518134	46518282	Merged-chr19-46518208-2	Trim8 (+16560), Arl3 (+54877)
chr19	46518655	46518803	Merged-chr19-46518729-2	Trim8 (+17081), Arl3 (+54356)
chr19	46755202	46755350	Merged-chr19-46755276-2	Cnnm2 (-6320), As3mt (+47833)
chr19	46761822	46761970	Merged-chr19-46761896-2	Cnnm2 (+300)
chr19	47019451	47019599	Merged-chr19-47019525-2	Nt5c2 (-4372)
chr19	47222690	47222838	Merged-chr19-47222764-2	Neurl1a (+43944), Sh3pxd2a (+241647)
chr19	47328051	47328199	Merged-chr19-47328125-2	Sh3pxd2a (+136286), Neurl1a (+149305)
chr19	47491846	47491994	Merged-chr19-47491920-2	Sh3pxd2a (-27509), Obfc1 (+45199)
chr19	47731306	47731454	Merged-chr19-47731380-1	Sfr1 (-376)
chr19	50162473	50162621	Merged-chr19-50162547-2	Rpl13a-ps1 (-131812), Sorcs1 (+516099)
chr19	53142242	53142390	Merged-chr19-53142316-1	Mxi1 (-168190), Add3 (+1871)
chr19	53676425	53676573	Merged-chr19-53676499-2	Rbm20 (-807)
chr19	53748809	53748957	Merged-chr19-53748883-1	Pdcd4 (-143348), Rbm20 (+71577)
chr19	53768459	53768607	Merged-chr19-53768533-2	Pdcd4 (-123698), Rbm20 (+91227)
chr19	54175864	54176012	Merged-chr19-54175938-1	Adra2a (+130756), Gpam (+923513)
chr19	55099364	55099512	Merged-chr19-55099438-2	Gpam (+13)
chr19	55714728	55714876	Merged-chr19-55714802-1	Tcf7l2 (-27008), Vti1a (+398451)
chr19	56547925	56548073	Merged-chr19-56547999-2	Nhlrc2 (-262), Dclre1a (+223)
chr19	57198252	57198400	Merged-chr19-57198326-2	Afap1l2 (-190116), Ablim1 (+17706)
chr19	57314756	57314904	Merged-chr19-57314830-2	Ablim1 (-98798), Fam160b1 (-46179)
chr19	58691319	58691467	Merged-chr19-58691393-2	Pnliprp1 (-37494), Pnlip (+21028)
chr19	59585888	59586036	Merged-chr19-59585962-2	Emx2 (+127590), Rab11fip2 (+357402)
chr19	60055207	60055355	Merged-chr19-60055281-1	Rab11fip2 (-111917), E330013P04Rik (-89408)
chr2	3423883	3424031	Merged-chr2-3423957-2	Meig1 (-1309), Dclre1c (-193)
chr2	5667527	5667675	Merged-chr2-5667601-1	Camk1d (+46914), Ccdc3 (+529825)
chr2	10048660	10048808	Merged-chr2-10048734-1	Taf3 (-138)
chr2	11062268	11062416	Merged-chr2-11062342-2	Prkcq (-110040), Sfmbt2 (+689892)
chr2	11503322	11503470	Merged-chr2-11503396-2	Pfkfb3 (-1306)
chr2	11679399	11679547	Merged-chr2-11679473-2	Il15ra (-26304), Il2ra (+36681)
chr2	14177176	14177324	Merged-chr2-14177250-2	Mrc1 (-52164), Tmem236 (+2726)
chr2	18026487	18026635	Merged-chr2-18026561-1	H2afb1 (-29615), A930004D18Rik (+11176)
chr2	18186644	18186792	Merged-chr2-18186718-2	Mllt10 (+131481), Dnajc1 (+206112)
chr2	18392631	18392779	Merged-chr2-18392705-2	Dnajc1 (+125)
chr2	18690580	18690728	Merged-chr2-18690654-1	BC061194 (-8369), Bmi1 (+13636)
chr2	18893486	18893634	Merged-chr2-18893560-2	Pip4k2a (+104566), BC061194 (+194537)
chr2	18955182	18955330	Merged-chr2-18955256-2	Pip4k2a (+42870), BC061194 (+256233)
chr2	18998126	18998274	Merged-chr2-18998200-2	4930426L09Rik (-143), Pip4k2a (-74)
chr2	19716063	19716211	Merged-chr2-19716137-2	Etl4 (-573776), Otud1 (+58075)
chr2	20654855	20655003	Merged-chr2-20654929-1	Arhgap21 (+312792), Etl4 (+365016)
chr2	20665716	20665864	Merged-chr2-20665790-2	Arhgap21 (+301931), Etl4 (+375877)
chr2	23156412	23156560	Merged-chr2-23156486-1	Mastl (-462), Yme1l1 (+117)
chr2	23998947	23999095	Merged-chr2-23999021-2	Spopl (-426917), Hnmt (+50373)
chr2	24166992	24167140	Merged-chr2-24167066-1	Il1f9 (-19410), Il1f8 (+13905)
chr2	24405746	24405894	Merged-chr2-24405820-1	Psd4 (+38210), Pax8 (+69779)
chr2	25035028	25035176	Merged-chr2-25035102-2	Nsmf (-19253), Pnpla7 (+59069)
chr2	25185913	25186061	Merged-chr2-25185987-1	Nrarp (+5229), Tor4a (+10899)
chr2	25319010	25319158	Merged-chr2-25319084-2	Grin1 (+36)
chr2	25365479	25365627	Merged-chr2-25365553-1	Uap1l1 (+129)
chr2	25400892	25401040	Merged-chr2-25400966-1	Npdc1 (-2105)
chr2	25425374	25425522	Merged-chr2-25425448-2	Abca2 (-3255)
chr2	25428480	25428628	Merged-chr2-25428554-1	Abca2 (-149)
chr2	25557845	25557993	Merged-chr2-25557919-1	Edf1 (+72)
chr2	25797659	25797807	Merged-chr2-25797733-2	Glt6d1 (+18115), Lcn11 (+20716)
chr2	26170980	26171128	Merged-chr2-26171054-2	Nacc2 (-78877), Lhx3 (+35521)
chr2	26237160	26237308	Merged-chr2-26237234-2	Qsox2 (+291)
chr2	26300222	26300370	Merged-chr2-26300296-2	Gpsm1 (-19477), 4932418E24Rik (-5739)
chr2	26458967	26459115	Merged-chr2-26459041-2	Sec16a (-13825), Notch1 (+44781)
chr2	26460926	26461074	Merged-chr2-26461000-1	Sec16a (-15784), Notch1 (+42822)
chr2	26547569	26547717	Merged-chr2-26547643-2	Notch1 (-43821), Egfl7 (-33413)
chr2	26902946	26903094	Merged-chr2-26903020-2	Surf6 (-141)
chr2	26949331	26949479	Merged-chr2-26949405-2	Rexo4 (+14981), Gm711 (+15336)
chr2	27122143	27122291	Merged-chr2-27122217-2	Fam163b (+20274), Adamtsl2 (+42838)
chr2	27378008	27378156	Merged-chr2-27378082-2	Sardh (-130816), Vav2 (+48951)
chr2	27746387	27746535	Merged-chr2-27746461-2	Col5a1 (-139964), Rxra (+69260)
chr2	28538027	28538175	Merged-chr2-28538101-1	Ralgds (+4559), Cel (+25261)
chr2	28607347	28607495	Merged-chr2-28607421-2	Gtf3c5 (-24142), Gfi1b (+14561)
chr2	28839829	28839977	Merged-chr2-28839903-2	Ddx31 (-556), Gtf3c4 (+383)
chr2	28908173	28908321	Merged-chr2-28908247-2	Barhl1 (+8165), Ddx31 (+67788)
chr2	29493460	29493608	Merged-chr2-29493534-2	Rapgef1 (-126186), Med27 (+146715)
chr2	29573760	29573908	Merged-chr2-29573834-2	Rapgef1 (-45886), Med27 (+227015)
chr2	30363902	30364050	Merged-chr2-30363976-2	Sh3glb2 (-4660), Fam73b (-320)
chr2	30445440	30445588	Merged-chr2-30445514-2	Ier5l (+28685), Ppp2r4 (+29475)
chr2	30693520	30693668	Merged-chr2-30693594-1	Cstad (+98554), 1700001O22Rik (+108113)
chr2	30712275	30712423	Merged-chr2-30712349-2	1700001O22Rik (+89358), Cstad (+117309)
chr2	30779849	30779997	Merged-chr2-30779923-2	1700001O22Rik (+21784), Cstad (+184883)
chr2	30928320	30928468	Merged-chr2-30928394-2	Ptges (-25097), Tor1b (-24565)
chr2	30942889	30943037	Merged-chr2-30942963-1	Ptges (-39666), Tor1b (-9996)
chr2	30982374	30982522	Merged-chr2-30982448-1	BC005624 (-507), Usp20 (+169)
chr2	31239302	31239450	Merged-chr2-31239376-2	Ncs1 (-6447), Gpr107 (+87060)
chr2	31436301	31436449	Merged-chr2-31436375-2	Ass1 (-33832), Hmcn2 (+121960)
chr2	31528318	31528466	Merged-chr2-31528392-1	Fubp3 (-44333), Ass1 (+58185)
chr2	31572421	31572569	Merged-chr2-31572495-1	Fubp3 (-230)
chr2	31869816	31869964	Merged-chr2-31869890-2	Fibcd1 (-23885), Lamc3 (-17454)
chr2	31870778	31870926	Merged-chr2-31870852-2	Fibcd1 (-24847), Lamc3 (-16492)
chr2	31924849	31924997	Merged-chr2-31924923-1	Aif1l (-25337), Lamc3 (+37579)
chr2	32168021	32168169	Merged-chr2-32168095-2	Pomt1 (-68495), Prrc2b (+16947)
chr2	32174441	32174589	Merged-chr2-32174515-2	Pomt1 (-62075), Prrc2b (+23367)
chr2	32302790	32302938	Merged-chr2-32302864-1	Ciz1 (-49463), Golga2 (+14611)
chr2	32304618	32304766	Merged-chr2-32304692-1	Ciz1 (-47635), Golga2 (+16439)
chr2	32422236	32422384	Merged-chr2-32422310-2	Naif1 (-28147), Ptges2 (+26414)
chr2	32713358	32713506	Merged-chr2-32713432-2	Cdk9 (-648)
chr2	33438524	33438672	Merged-chr2-33438598-2	Zbtb34 (-7274), Zbtb43 (+23755)
chr2	33594991	33595139	Merged-chr2-33595065-2	Zbtb43 (-132712), Lmx1b (+45446)
chr2	34480331	34480479	Merged-chr2-34480405-2	Mapkap1 (+73222), Gapvd1 (+274827)
chr2	34920430	34920578	Merged-chr2-34920504-1	Phf19 (-6528), Traf1 (+37630)
chr2	37767223	37767371	Merged-chr2-37767297-2	Strbp (-120012), Crb2 (-8952)
chr2	38287188	38287336	Merged-chr2-38287262-1	Dennd1a (+113)
chr2	38418092	38418240	Merged-chr2-38418166-1	Nek6 (-93477), Lhx2 (+67407)
chr2	38658633	38658781	Merged-chr2-38658707-1	Psmb7 (-14620), Nr5a1 (+53527)
chr2	38688942	38689090	Merged-chr2-38689016-2	Psmb7 (-44929), Nr5a1 (+23218)
chr2	38975499	38975647	Merged-chr2-38975573-1	Wdr38 (-22746), Olfml2a (+43595)
chr2	38976501	38976649	Merged-chr2-38976575-2	Wdr38 (-21744), Olfml2a (+44597)
chr2	38992078	38992226	Merged-chr2-38992152-1	Wdr38 (-6167), Olfml2a (+60174)
chr2	39190924	39191072	Merged-chr2-39190998-2	Scai (-268)
chr2	42740603	42740751	Merged-chr2-42740677-1	Kynu (-814652), Lrp1b (-87079)
chr2	44927585	44927733	Merged-chr2-44927659-2	Gtdc1 (-66037), Zeb2 (+185620)
chr2	49817398	49817546	Merged-chr2-49817472-2	Lypd6 (-248992), Lypd6b (+29784)
chr2	52072061	52072209	Merged-chr2-52072135-1	Rif1 (-702)
chr2	57238051	57238199	Merged-chr2-57238125-2	Gpd2 (+447)
chr2	58711657	58711805	Merged-chr2-58711731-1	Acvr1 (-144905), Upp2 (-43449)
chr2	59612001	59612149	Merged-chr2-59612075-2	Tanc1 (+31)
chr2	60384550	60384698	Merged-chr2-60384624-2	Ly75 (-1393)
chr2	60553012	60553160	Merged-chr2-60553086-2	Pla2r1 (+222)
chr2	68364225	68364373	Merged-chr2-68364299-1	Stk39 (+107969), B3galt1 (+246586)
chr2	70661286	70661434	Merged-chr2-70661360-1	Gorasp2 (-216)
chr2	71167265	71167413	Merged-chr2-71167339-2	Dync1i2 (-44367), Cybrd1 (+49416)
chr2	71344333	71344481	Merged-chr2-71344407-2	Slc25a12 (+23342), Dync1i2 (+132701)
chr2	71387871	71388019	Merged-chr2-71387945-2	Hat1 (-1315)
chr2	71652441	71652589	Merged-chr2-71652515-1	Dlx2 (-105761), Gm1631 (-66902)
chr2	74965548	74965696	Merged-chr2-74965622-2	Hnrnpa3 (-693639), Mtx2 (+139819)
chr2	75634006	75634154	Merged-chr2-75634080-2	Hnrnpa3 (-25181), Mtx2 (+808277)
chr2	75750463	75750611	Merged-chr2-75750537-2	Agps (-81640), Nfe2l2 (-45896)
chr2	76338750	76338898	Merged-chr2-76338824-1	Pde11a (-50)
chr2	76370215	76370363	Merged-chr2-76370289-1	Rbm45 (+305)
chr2	78189678	78189826	Merged-chr2-78189752-2	Ube2e3 (-679295), Cwc22 (-243377)
chr2	84837224	84837372	Merged-chr2-84837298-2	Slc43a1 (-2110)
chr2	91183250	91183398	Merged-chr2-91183324-2	Madd (+494)
chr2	91308882	91309030	Merged-chr2-91308956-2	Arfgap2 (+43663), 1110051M20Rik (+135686)
chr2	91309682	91309830	Merged-chr2-91309756-2	Arfgap2 (+44463), 1110051M20Rik (+134886)
chr2	91904747	91904895	Merged-chr2-91904821-2	Chrm4 (-17368), Ambra1 (+174596)
chr2	92012904	92013052	Merged-chr2-92012978-2	Dgkz (-62551), Creb3l1 (+11524)
chr2	92144034	92144182	Merged-chr2-92144108-2	Creb3l1 (-119606), Phf21a (-77454)
chr2	92947978	92948126	Merged-chr2-92948052-2	Syt13 (+32954), Prdm11 (+97519)
chr2	93035789	93035937	Merged-chr2-93035863-2	Prdm11 (+9708), Syt13 (+120765)
chr2	93334426	93334574	Merged-chr2-93334500-1	Tspan18 (-13)
chr2	94406084	94406232	Merged-chr2-94406158-1	Ttc17 (+531)
chr2	101136967	101137115	Merged-chr2-101137041-2	Rag2 (-487677)
chr2	102110349	102110497	Merged-chr2-102110423-2	Ldlrad3 (+75962), Commd9 (+224170)
chr2	102117469	102117617	Merged-chr2-102117543-2	Ldlrad3 (+68842), Commd9 (+231290)
chr2	102231571	102231719	Merged-chr2-102231645-2	Ldlrad3 (-45260), Trim44 (+169255)
chr2	103289504	103289652	Merged-chr2-103289578-2	Ehf (+13700), Apip (+215903)
chr2	103302898	103303046	Merged-chr2-103302972-2	Ehf (+306)
chr2	103970318	103970466	Merged-chr2-103970392-2	Lmo2 (+169)
chr2	104122508	104122656	Merged-chr2-104122582-2	A930018P22Rik (-187)
chr2	104378068	104378216	Merged-chr2-104378142-2	D430041D05Rik (+32192), A930018P22Rik (+255373)
chr2	104494325	104494473	Merged-chr2-104494399-2	Hipk3 (+47)
chr2	105258564	105258712	Merged-chr2-105258638-2	0610012H03Rik (+34318), Rcn1 (+140681)
chr2	105263336	105263484	Merged-chr2-105263410-2	0610012H03Rik (+39090), Rcn1 (+135909)
chr2	106200323	106200471	Merged-chr2-106200397-1	Mpped2 (-492872), Dnajc24 (-196848)
chr2	106694278	106694426	Merged-chr2-106694352-1	Mpped2 (+1083), Arl14ep (+280072)
chr2	107061660	107061808	Merged-chr2-107061734-2	Fshb (-2078)
chr2	112265750	112265898	Merged-chr2-112265824-1	Slc12a6 (-995), Gm21985 (-490)
chr2	112379344	112379492	Merged-chr2-112379418-2	Katnbl1 (+207)
chr2	112455404	112455552	Merged-chr2-112455478-1	Emc7 (+481)
chr2	112676840	112676988	Merged-chr2-112676914-2	Aven (+183950), Ryr3 (+353417)
chr2	112843029	112843177	Merged-chr2-112843103-2	Ryr3 (+187228), Aven (+350139)
chr2	113327733	113327881	Merged-chr2-113327807-1	Fmn1 (+25)
chr2	113829037	113829185	Merged-chr2-113829111-1	Scg5 (+10)
chr2	114177945	114178093	Merged-chr2-114178019-1	Aqr (-2680)
chr2	114235722	114235870	Merged-chr2-114235796-2	Zfp770 (-34327), Atpbd4 (+419168)
chr2	115581242	115581390	Merged-chr2-115581316-2	BC052040 (-400)
chr2	116979895	116980043	Merged-chr2-116979969-2	Spred1 (-141405), Tmco5 (+101261)
chr2	118779684	118779832	Merged-chr2-118779758-1	Disp2 (+36)
chr2	119300080	119300228	Merged-chr2-119300154-1	Dll4 (-25630), Vps18 (+11412)
chr2	121101589	121101737	Merged-chr2-121101663-2	Tgm5 (-15822), Tgm7 (+8132)
chr2	121770718	121770866	Merged-chr2-121770792-1	Frmd5 (+36295), Wdr76 (+264009)
chr2	121806770	121806918	Merged-chr2-121806844-1	Frmd5 (+243)
chr2	121867067	121867215	Merged-chr2-121867141-2	Casc4 (+171)
chr2	122118144	122118292	Merged-chr2-122118218-2	Spg11 (+168)
chr2	125134355	125134503	Merged-chr2-125134429-1	Ctxn2 (-2263)
chr2	126302487	126302635	Merged-chr2-126302561-1	Dtwd1 (+150420), Atp8b4 (+197286)
chr2	126552431	126552579	Merged-chr2-126552505-2	Slc27a2 (+98)
chr2	126552917	126553065	Merged-chr2-126552991-2	Slc27a2 (+584)
chr2	126871466	126871614	Merged-chr2-126871540-2	Usp50 (-88096), Trpm7 (+4690)
chr2	126876365	126876513	Merged-chr2-126876439-2	Trpm7 (-209)
chr2	126990100	126990248	Merged-chr2-126990174-1	Sppl2a (-56939), Ap4e1 (-18556)
chr2	127587420	127587568	Merged-chr2-127587494-1	Zfp661 (-400), Mrps5 (+272)
chr2	127927581	127927729	Merged-chr2-127927655-2	Bcl2l11 (-198384), Acoxl (+73027)
chr2	128211975	128212123	Merged-chr2-128212049-2	Gm355 (-379160), Bcl2l11 (+86010)
chr2	128265547	128265695	Merged-chr2-128265621-2	Gm355 (-325588), Bcl2l11 (+139582)
chr2	128396024	128396172	Merged-chr2-128396098-2	Gm355 (-195111), Bcl2l11 (+270059)
chr2	128818253	128818401	Merged-chr2-128818327-1	Tmem87b (+209)
chr2	128892395	128892543	Merged-chr2-128892469-2	Fbln7 (+29488), Zc3h8 (+51608)
chr2	128911882	128912030	Merged-chr2-128911956-2	Zc3h8 (+32121), Fbln7 (+48975)
chr2	129413502	129413650	Merged-chr2-129413576-1	Il1b (-42437), F830045P16Rik (+123026)
chr2	130635881	130636029	Merged-chr2-130635955-2	Ubox5 (-5917), Lzts3 (+6848)
chr2	131186879	131187027	Merged-chr2-131186953-2	Cdc25b (+4)
chr2	131190386	131190534	Merged-chr2-131190460-2	Ap5s1 (-19980), Cdc25b (+3511)
chr2	131190802	131190950	Merged-chr2-131190876-2	Ap5s1 (-19564), Cdc25b (+3927)
chr2	132577865	132578013	Merged-chr2-132577939-2	Gpcpd1 (+309)
chr2	132946047	132946195	Merged-chr2-132946121-2	Fermt1 (-215)
chr2	132992657	132992805	Merged-chr2-132992731-2	Bmp2 (-559428), Fermt1 (-46825)
chr2	133596657	133596805	Merged-chr2-133596731-2	Bmp2 (+44572), Hao1 (+957637)
chr2	135073131	135073279	Merged-chr2-135073205-2	Plcb4 (-668625), Plcb1 (+287046)
chr2	135658537	135658685	Merged-chr2-135658611-1	Plcb4 (-83219), Plcb1 (+872452)
chr2	135887905	135888053	Merged-chr2-135887979-2	Lamp5 (-169948), Plcb4 (+146149)
chr2	136890995	136891143	Merged-chr2-136891069-2	Slx4ip (-1099), Mkks (+320)
chr2	138265361	138265509	Merged-chr2-138265435-2	Btbd3 (-13058)
chr2	139711576	139711724	Merged-chr2-139711650-1	Ism1 (+33472), Tasp1 (+355110)
chr2	140671300	140671448	Merged-chr2-140671374-2	Flrt3 (+76), Flrt3 (+95)
chr2	143546865	143547013	Merged-chr2-143546939-1	Pcsk2 (+783)
chr2	144369119	144369267	Merged-chr2-144369193-2	Csrp2bp (+210)
chr2	146838642	146838790	Merged-chr2-146838716-2	Ralgapa2 (-326712), Plk1s1 (-17148)
chr2	146855851	146855999	Merged-chr2-146855925-2	Plk1s1 (+61)
chr2	150909630	150909778	Merged-chr2-150909704-1	Abhd12 (-4963), Gins1 (+110)
chr2	150952522	150952670	Merged-chr2-150952596-2	Gins1 (+43002), Ninl (+56802)
chr2	151967345	151967493	Merged-chr2-151967419-1	Fam110a (+6516), Angpt4 (+56209)
chr2	151991534	151991682	Merged-chr2-151991608-1	Slc52a3 (-4927)
chr2	152000011	152000159	Merged-chr2-152000085-2	Scrt2 (-81444), Slc52a3 (+3550)
chr2	152029556	152029704	Merged-chr2-152029630-1	Scrt2 (-51899), Slc52a3 (+33095)
chr2	152049206	152049354	Merged-chr2-152049280-2	Scrt2 (-32249), Slc52a3 (+52745)
chr2	152117241	152117389	Merged-chr2-152117315-2	Tcf15 (-26246), Srxn1 (+11585)
chr2	152128734	152128882	Merged-chr2-152128808-1	Tcf15 (-14753), Srxn1 (+23078)
chr2	152177467	152177615	Merged-chr2-152177541-1	Csnk2a1 (-49298), Tcf15 (+33980)
chr2	152180584	152180732	Merged-chr2-152180658-2	Csnk2a1 (-46181), Tcf15 (+37097)
chr2	152293948	152294096	Merged-chr2-152294022-2	Tbc1d20 (+194)
chr2	152723959	152724107	Merged-chr2-152724033-2	Id1 (-12218), Mcts2 (+36885)
chr2	152726884	152727032	Merged-chr2-152726958-2	Id1 (-9293), Mcts2 (+39810)
chr2	152739464	152739612	Merged-chr2-152739538-2	Cox4i2 (-15556), Id1 (+3287)
chr2	152804447	152804595	Merged-chr2-152804521-2	Bcl2l1 (+26145), Cox4i2 (+49427)
chr2	152816376	152816524	Merged-chr2-152816450-2	Bcl2l1 (+14216), Cox4i2 (+61356)
chr2	152816731	152816879	Merged-chr2-152816805-2	Bcl2l1 (+13861), Cox4i2 (+61711)
chr2	153071929	153072077	Merged-chr2-153072003-2	Hck (-36465), Ccm2l (+6001)
chr2	153492571	153492719	Merged-chr2-153492645-1	4930404H24Rik (-145)
chr2	153493029	153493177	Merged-chr2-153493103-2	4930404H24Rik (+313)
chr2	153584512	153584660	Merged-chr2-153584586-2	8430427H17Rik (-54615), Commd7 (+48195)
chr2	153593475	153593623	Merged-chr2-153593549-1	8430427H17Rik (-63578), Commd7 (+39232)
chr2	154421411	154421559	Merged-chr2-154421485-2	Cbfa2t2 (-15010), Snta1 (-13386)
chr2	154426692	154426840	Merged-chr2-154426766-2	Snta1 (-18667), Cbfa2t2 (-9729)
chr2	154428022	154428170	Merged-chr2-154428096-2	Snta1 (-19997), Cbfa2t2 (-8399)
chr2	154466087	154466235	Merged-chr2-154466161-2	1700003F12Rik (-82727), Cbfa2t2 (+29666)
chr2	154581580	154581728	Merged-chr2-154581654-1	E2f1 (-11762), Pxmp4 (+22054)
chr2	154639314	154639462	Merged-chr2-154639388-2	4930519P11Rik (-25951), Chmp4b (-17630)
chr2	154657009	154657157	Merged-chr2-154657083-2	Chmp4b (+65)
chr2	155050613	155050761	Merged-chr2-155050687-1	Ahcy (+23810), Gm14226 (+32421)
chr2	155091235	155091383	Merged-chr2-155091309-2	Itch (-42250), Ahcy (-16812)
chr2	155142226	155142374	Merged-chr2-155142300-2	Dynlrb1 (-94235), Itch (+8741)
chr2	155729304	155729452	Merged-chr2-155729378-2	Edem2 (+97)
chr2	156200004	156200152	Merged-chr2-156200078-2	Cnbd2 (-112221), Phf20 (+3436)
chr2	156311996	156312144	Merged-chr2-156312070-1	Cnbd2 (-229), Scand1 (+634)
chr2	156531396	156531544	Merged-chr2-156531470-1	Aar2 (-16126), Epb4.1l1 (+110561)
chr2	156721115	156721263	Merged-chr2-156721189-1	Myl9 (-54231), Dlgap4 (+107484)
chr2	157027362	157027510	Merged-chr2-157027436-2	Dsn1 (-20282), Soga1 (+51818)
chr2	157058748	157058896	Merged-chr2-157058822-2	Dsn1 (-51668), Soga1 (+20432)
chr2	157059193	157059341	Merged-chr2-157059267-1	Dsn1 (-52113), Soga1 (+19987)
chr2	157376360	157376508	Merged-chr2-157376434-1	Src (-47859), Manbal (+8840)
chr2	158556423	158556571	Merged-chr2-158556497-2	Slc32a1 (-54270), Arhgap40 (+43701)
chr2	158591353	158591501	Merged-chr2-158591427-2	Slc32a1 (-19340), Arhgap40 (+78631)
chr2	158631556	158631704	Merged-chr2-158631630-2	Ppp1r16b (-33768), Actr5 (+6742)
chr2	158799393	158799541	Merged-chr2-158799467-1	Dhx35 (+4660)
chr2	162568853	162569001	Merged-chr2-162568927-1	Ptprt (+92220)
chr2	162934509	162934657	Merged-chr2-162934583-1	L3mbtl1 (-8891), Srsf6 (+3055)
chr2	163032793	163032941	Merged-chr2-163032867-1	Mybl2 (-21820), Ift52 (+15513)
chr2	163054623	163054771	Merged-chr2-163054697-1	Mybl2 (+10)
chr2	163449414	163449562	Merged-chr2-163449488-2	2310001K24Rik (-23057), Gdap1l1 (+11012)
chr2	163463449	163463597	Merged-chr2-163463523-2	2310001K24Rik (-9022), Gdap1l1 (+25047)
chr2	163481651	163481799	Merged-chr2-163481725-1	R3hdml (-10593), Fitm2 (-9096)
chr2	163883309	163883457	Merged-chr2-163883383-2	Kcnk15 (+29732), Rims4 (+35300)
chr2	163889447	163889595	Merged-chr2-163889521-1	Rims4 (+29162), Kcnk15 (+35870)
chr2	164435679	164435827	Merged-chr2-164435753-2	Matn4 (-31139), Sdc4 (+7433)
chr2	164671067	164671215	Merged-chr2-164671141-2	Wfdc9 (-14558), Wfdc11 (+2946)
chr2	164821184	164821332	Merged-chr2-164821258-2	Zswim1 (-1428)
chr2	164824067	164824215	Merged-chr2-164824141-2	Zswim1 (+1455), Spata25 (+4396)
chr2	165239631	165239779	Merged-chr2-165239705-1	Cdh22 (-4852)
chr2	165470328	165470476	Merged-chr2-165470402-2	Ocstamp (-69997), Slc13a3 (+2828)
chr2	165563459	165563607	Merged-chr2-165563533-2	Eya2 (-91765), Slc2a10 (+59746)
chr2	165693061	165693209	Merged-chr2-165693135-2	Eya2 (+37837), Zmynd8 (+165038)
chr2	165833612	165833760	Merged-chr2-165833686-1	Zmynd8 (+24487), Eya2 (+178388)
chr2	165900354	165900502	Merged-chr2-165900428-2	Ncoa3 (-92209), Zmynd8 (-42255)
chr2	166194208	166194356	Merged-chr2-166194282-1	Sulf2 (-38619), Prex1 (+519550)
chr2	166218932	166219080	Merged-chr2-166219006-1	Sulf2 (-63343), Prex1 (+494826)
chr2	166316611	166316759	Merged-chr2-166316685-1	Sulf2 (-161022), Prex1 (+397147)
chr2	166389688	166389836	Merged-chr2-166389762-2	Sulf2 (-234099), Prex1 (+324070)
chr2	166887943	166888091	Merged-chr2-166888017-2	Cse1l (-18042), Arfgef2 (+82429)
chr2	167072335	167072483	Merged-chr2-167072409-1	Znfx1 (-9394), Kcnb1 (+116390)
chr2	167079049	167079197	Merged-chr2-167079123-2	Znfx1 (-16108), Kcnb1 (+109676)
chr2	167090789	167090937	Merged-chr2-167090863-2	Znfx1 (-27848), Kcnb1 (+97936)
chr2	167095511	167095659	Merged-chr2-167095585-2	Znfx1 (-32570), Kcnb1 (+93214)
chr2	167423287	167423435	Merged-chr2-167423361-1	Rnf114 (-69284), Slc9a8 (+1649)
[truncated: 1,505 more rows]

## Sheet: MYOD1_ChIP-seq
Chr	Start	End	PeakID	GREAT_targets
chr1	4834670	4834842	Merged-chr1-4834756-2	Tcea1 (-23282), Lypla1 (+26933)
chr1	6458069	6458241	Merged-chr1-6458155-1	St18 (-29076), Fam150a (+98824)
chr1	7313593	7313765	Merged-chr1-7313679-2	Pcmtd1 (+224759)
chr1	9747815	9747987	Merged-chr1-9747901-1	Vcpip1 (+481)
chr1	9997817	9997989	Merged-chr1-9997903-2	Gm10567 (-35094), Ppp1r42 (+11233)
chr1	11416518	11416690	Merged-chr1-11416604-2	A830018L16Rik (+2492)
chr1	11505407	11505579	Merged-chr1-11505493-2	A830018L16Rik (+91381)
chr1	12034528	12034700	Merged-chr1-12034614-1	Sulf1 (-657816), A830018L16Rik (+620502)
chr1	12644724	12644896	Merged-chr1-12644810-2	Sulf1 (-47620)
chr1	12814534	12814706	Merged-chr1-12814620-2	Sulf1 (+122190), Slco5a1 (+176557)
chr1	16436568	16436740	Merged-chr1-16436654-2	Stau2 (+82652), Rdh10 (+330880)
chr1	17193192	17193364	Merged-chr1-17193278-2	Pi15 (-408623), Gdap1 (+47916)
chr1	20058450	20058622	Merged-chr1-20058536-2	Pkhd1 (+559528), Tfap2b (+849622)
chr1	24613030	24613202	Merged-chr1-24613116-1	Gm10222 (-416)
chr1	27108865	27109037	Merged-chr1-27108951-2	4931408C20Rik (-421491)
chr1	34859871	34860043	Merged-chr1-34859957-2	Plekhb2 (+9965)
chr1	35767460	35767632	Merged-chr1-35767546-2	Hs6st1 (-300854), Plekhb2 (+917554)
chr1	35995870	35996042	Merged-chr1-35995956-2	Hs6st1 (-72444)
chr1	36061238	36061410	Merged-chr1-36061324-2	Hs6st1 (-7076)
chr1	36251556	36251728	Merged-chr1-36251642-2	Uggt1 (-7337), Neurl3 (+21783)
chr1	36580159	36580331	Merged-chr1-36580245-2	Sema4c (-22719), Fam178b (+102938)
chr1	39478056	39478228	Merged-chr1-39478142-2	Tbc1d8 (+605)
chr1	42763586	42763758	Merged-chr1-42763672-2	Mrps9 (-87561), Pou3f3 (+66526)
chr1	43136639	43136811	Merged-chr1-43136725-2	Fhl2 (+27236), AI597479 (+38015)
chr1	44157099	44157271	Merged-chr1-44157185-1	Ercc5 (+9338), Mettl21e (+61776)
chr1	45915421	45915593	Merged-chr1-45915507-2	Slc40a1 (+10087), Wdr75 (+120341)
chr1	53750105	53750277	Merged-chr1-53750191-1	Dnahc7a (-43407), Stk17b (+35033)
chr1	54485005	54485177	Merged-chr1-54485091-2	Gtf3c3 (-46120), Pgap1 (+72593)
chr1	55363732	55363904	Merged-chr1-55363818-2	Boll (-499)
chr1	55524092	55524264	Merged-chr1-55524178-2	Plcl1 (+117790)
chr1	58486255	58486427	Merged-chr1-58486341-2	Ppil3 (-40912), Orc2 (+18768)
chr1	59400006	59400178	Merged-chr1-59400092-2	Fzd7 (-82055), Cdk15 (+143185)
chr1	59697930	59698102	Merged-chr1-59698016-2	Bmpr2 (-66263), Nop58 (+13010)
chr1	60432618	60432790	Merged-chr1-60432704-1	Abi2 (+23085), Raph1 (+134061)
chr1	63114221	63114393	Merged-chr1-63114307-2	Ino80d (-40)
chr1	63507899	63508071	Merged-chr1-63507985-2	Adam23 (+62081), Dytn (+178942)
chr1	64196086	64196258	Merged-chr1-64196172-2	Creb1 (-336632), Klf7 (-74783)
chr1	65292783	65292955	Merged-chr1-65292869-2	Pth2r (-18388), Pikfyve (+106119)
chr1	72244355	72244527	Merged-chr1-72244441-1	Mreg (-32134), Pecr (+39873)
chr1	72951921	72952093	Merged-chr1-72952007-2	Igfbp5 (-77123), Tnp1 (+63892)
chr1	72960326	72960498	Merged-chr1-72960412-2	Igfbp5 (-85528), Tnp1 (+55487)
chr1	74106323	74106495	Merged-chr1-74106409-2	Tns1 (+18038)
chr1	75218529	75218701	Merged-chr1-75218615-1	Tuba4a (+638)
chr1	75344749	75344921	Merged-chr1-75344835-2	Dnpep (-27198), Des (-15494)
chr1	75506533	75506705	Merged-chr1-75506619-2	Inha (-458), Obsl1 (-258)
chr1	78181911	78182083	Merged-chr1-78181997-1	Epha4 (-666909), Pax3 (+14841)
chr1	79317306	79317478	Merged-chr1-79317392-2	Scg2 (+122698), Kcne4 (+500443)
chr1	80403548	80403720	Merged-chr1-80403634-1	Cul3 (-63154), Dock10 (+354919)
chr1	84868971	84869143	Merged-chr1-84869057-2	Fbxo36 (+29216), Slc16a14 (+66068)
chr1	85087630	85087802	Merged-chr1-85087716-1	Slc16a14 (-152591), A530032D15Rik (+22137)
chr1	85088354	85088526	Merged-chr1-85088440-1	Slc16a14 (-153315), A530032D15Rik (+21413)
chr1	85262277	85262449	Merged-chr1-85262363-1	A530032D15Rik (-152510), C130026I21Rik (+8180)
chr1	85281078	85281250	Merged-chr1-85281164-1	C130026I21Rik (-10621), Sp110 (+317653)
chr1	85494998	85495170	Merged-chr1-85495084-1	C130026I21Rik (-224541), Sp110 (+103733)
chr1	85584138	85584310	Merged-chr1-85584224-1	C130026I21Rik (-313681), Sp110 (+14593)
chr1	85617643	85617815	Merged-chr1-85617729-2	Sp100 (-32321), Sp140 (+17026)
chr1	85624924	85625096	Merged-chr1-85625010-1	Sp100 (-25040), Sp140 (+24307)
chr1	86360958	86361130	Merged-chr1-86361044-2	Ncl (-1589)
chr1	86434497	86434669	Merged-chr1-86434583-2	Ptma (-92153), 1700019O17Rik (+8254)
chr1	87327433	87327605	Merged-chr1-87327519-2	Gigyf2 (+516)
chr1	88233769	88233941	Merged-chr1-88233855-2	Mroh2a (+6835), Hjurp (+43778)
chr1	89011557	89011729	Merged-chr1-89011643-1	Arl4c (-309422), Sh3bp4 (-58772)
chr1	89408097	89408269	Merged-chr1-89408183-2	Agap1 (-46628), Sh3bp4 (+337768)
chr1	89628402	89628574	Merged-chr1-89628488-2	D130058E05Rik (-301746), Agap1 (+173677)
chr1	89998788	89998960	Merged-chr1-89998874-2	Gbx2 (-65584), Asb18 (+15703)
chr1	90156696	90156868	Merged-chr1-90156782-1	Iqca (-3381)
chr1	90405077	90405249	Merged-chr1-90405163-2	Cops8 (-198262), Cxcr7 (+201183)
chr1	91414199	91414371	Merged-chr1-91414285-2	Hes6 (-1063)
chr1	92222098	92222270	Merged-chr1-92222184-2	Hdac4 (-73791), Ndufa10 (+251676)
chr1	92365650	92365822	Merged-chr1-92365736-2	Hdac4 (-217343), Ndufa10 (+108124)
chr1	93668823	93668995	Merged-chr1-93668909-2	Stk25 (-33187), Bok (-16785)
chr1	118457987	118458159	Merged-chr1-118458073-1	2900060B14Rik (+674)
chr1	118459108	118459280	Merged-chr1-118459194-1	2900060B14Rik (-447)
chr1	120103923	120104095	Merged-chr1-120104009-2	Tmem37 (-29935), Dbi (+16928)
chr1	125389788	125389960	Merged-chr1-125389874-2	Actr3 (+45853)
chr1	125390205	125390377	Merged-chr1-125390291-2	Actr3 (+45436)
chr1	126149994	126150166	Merged-chr1-126150080-2	Lypd1 (-237866), Nckap5 (+680552)
chr1	126316992	126317164	Merged-chr1-126317078-2	Lypd1 (-404864), Nckap5 (+513554)
chr1	127244577	127244749	Merged-chr1-127244663-1	Nckap5 (-414031), Mgat5 (-62099)
chr1	127774268	127774440	Merged-chr1-127774354-1	Ccnt2 (+190)
chr1	127989597	127989769	Merged-chr1-127989683-2	Zranb3 (+112779), Rab3gap1 (+120910)
chr1	128444545	128444717	Merged-chr1-128444631-2	Dars (-27215), Cxcr4 (+147659)
chr1	129683023	129683195	Merged-chr1-129683109-2	Thsd7b (+409765), Daf2 (+739900)
chr1	130731887	130732059	Merged-chr1-130731973-2	AA986860 (-3)
chr1	131178880	131179052	Merged-chr1-131178966-2	Eif2d (+25785), Rassf5 (+66292)
chr1	131431921	131432093	Merged-chr1-131432007-2	Ikbke (-152401), Srgap2 (+95354)
chr1	132736401	132736573	Merged-chr1-132736487-2	Cntn2 (-193547), Nfasc (+5310)
chr1	132890792	132890964	Merged-chr1-132890878-2	Lrrn2 (+10605), Mdm4 (+134470)
chr1	132985525	132985697	Merged-chr1-132985611-1	Mdm4 (+39737), Lrrn2 (+105338)
chr1	133798642	133798814	Merged-chr1-133798728-2	Lax1 (-108620), Atp2b4 (+2313)
chr1	133893265	133893437	Merged-chr1-133893351-2	Atp2b4 (-92310), Optc (+13821)
chr1	134061209	134061381	Merged-chr1-134061295-2	Btg2 (+17825), Fmod (+24041)
chr1	134063303	134063475	Merged-chr1-134063389-2	Btg2 (+15731), Fmod (+26135)
chr1	134419429	134419601	Merged-chr1-134419515-2	Klhl12 (-36016), Adipor1 (+4059)
chr1	135698458	135698630	Merged-chr1-135698544-2	Csrp1 (-21517), Nav1 (-10439)
chr1	136707352	136707524	Merged-chr1-136707438-2	Zfp281 (+82537), Nr5a2 (+252989)
chr1	152203306	152203478	Merged-chr1-152203392-1	1700025G04Rik (-113072), Tsen15 (+183290)
chr1	152299209	152299381	Merged-chr1-152299295-1	1700025G04Rik (-208975), Tsen15 (+87387)
chr1	152565828	152566000	Merged-chr1-152565914-2	Rgl1 (+59303), Colgalt2 (+166084)
chr1	153091978	153092150	Merged-chr1-153092064-2	Lamc2 (+94383), Nmnat2 (+136963)
chr1	153184046	153184218	Merged-chr1-153184132-2	Lamc2 (+2315), Nmnat2 (+229031)
chr1	153641579	153641751	Merged-chr1-153641665-2	Npl (-91951), Rgs8 (-11360)
chr1	153677695	153677867	Merged-chr1-153677781-2	Rgs16 (-62568), Rgs8 (+24756)
chr1	153704986	153705158	Merged-chr1-153705072-2	Rgs16 (-35277), Rgs8 (+52047)
chr1	153733386	153733558	Merged-chr1-153733472-2	Rgs16 (-6877), Rgs8 (+80447)
chr1	154758944	154759116	Merged-chr1-154759030-2	Cacna1e (-33110), Ier5 (+340606)
chr1	154815116	154815288	Merged-chr1-154815202-1	Cacna1e (-89282), Ier5 (+284434)
chr1	157179363	157179535	Merged-chr1-157179449-1	2810025M15Rik (-232903), Tex35 (-70804)
chr1	159392210	159392382	Merged-chr1-159392296-2	Gm10530 (-222453), Rfwd2 (+159970)
chr1	159392785	159392957	Merged-chr1-159392871-2	Gm10530 (-221878), Rfwd2 (+160545)
chr1	160081717	160081889	Merged-chr1-160081803-2	4930562F07Rik (-3885)
chr1	163537422	163537594	Merged-chr1-163537508-2	Gorab (-133867), Mettl11b (+187724)
chr1	167598408	167598580	Merged-chr1-167598494-2	Rxrg (+110)
chr1	168306747	168306919	Merged-chr1-168306833-2	Pbx1 (+125064), Lmx1a (+617275)
chr1	169990890	169991062	Merged-chr1-169990976-2	Hsd17b7 (-21735), Ddr2 (+97968)
chr1	170619057	170619229	Merged-chr1-170619143-2	Nos1ap (-29282), Olfml2b (-25389)
chr1	170655641	170655813	Merged-chr1-170655727-2	Olfml2b (+11195), Atf6 (+212044)
chr1	171333301	171333473	Merged-chr1-171333387-2	Dedd (+4242), Nit1 (+12258)
chr1	171453070	171453242	Merged-chr1-171453156-2	Alyref2 (-50322), F11r (+15621)
chr1	171528096	171528268	Merged-chr1-171528182-1	Itln1 (+7112), Gm9765 (+12949)
chr1	171542402	171542574	Merged-chr1-171542488-1	Cd244 (-16705), Itln1 (-7194)
chr1	171551691	171551863	Merged-chr1-171551777-1	Itln1 (-16483), Cd244 (-7416)
chr1	171560792	171560964	Merged-chr1-171560878-1	Cd244 (+1685), Ly9 (+46532)
chr1	171590335	171590507	Merged-chr1-171590421-2	Ly9 (+16989), Cd244 (+31228)
chr1	171590893	171591065	Merged-chr1-171590979-2	Ly9 (+16431), Cd244 (+31786)
chr1	172133645	172133817	Merged-chr1-172133731-2	Dcaf8 (-14284), Pex19 (+6976)
chr1	173804816	173804988	Merged-chr1-173804902-2	Ifi204 (-38026), Mnda (+108020)
chr1	173965218	173965390	Merged-chr1-173965304-2	Mndal (-22813), Ifi202b (+17540)
chr1	175512303	175512475	Merged-chr1-175512389-2	Rgs7 (-21259), Fh1 (+113246)
chr1	176683116	176683288	Merged-chr1-176683202-2	Pld5 (-407904), Cep170 (+123922)
chr1	177441782	177441954	Merged-chr1-177441868-2	Zbtb18 (-2793)
chr1	177555744	177555916	Merged-chr1-177555830-1	1700016C15Rik (-173984), Zbtb18 (+111169)
chr1	177977426	177977598	Merged-chr1-177977512-2	Adss (-181001), Gm16432 (-13923)
chr1	179238785	179238957	Merged-chr1-179238871-2	Smyd3 (+279163), Kif26b (+709746)
chr1	180210779	180210951	Merged-chr1-180210865-2	Adck3 (-14845), Psen2 (+42273)
chr1	180411908	180412080	Merged-chr1-180411994-2	Gm5069 (-81444), 6330403A02Rik (+71473)
chr1	180777434	180777606	Merged-chr1-180777520-1	H3f3a (+36112), Acbd3 (+51477)
chr1	181256467	181256639	Merged-chr1-181256553-2	Cnih3 (-96075), Wdr26 (-45001)
chr1	181853063	181853235	Merged-chr1-181853149-1	Lbr (-10748), Enah (+166831)
chr1	181951586	181951758	Merged-chr1-181951672-1	Lbr (-109271), Enah (+68308)
chr1	182019758	182019930	Merged-chr1-182019844-2	Enah (+136)
chr1	182116152	182116324	Merged-chr1-182116238-2	Enah (-96258), Srp9 (-8512)
chr1	182408735	182408907	Merged-chr1-182408821-2	Trp53bp2 (-351), Gm10517 (+199)
chr1	185014609	185014781	Merged-chr1-185014695-1	Rab3gap2 (-189473), Mark1 (-15146)
chr1	185117382	185117554	Merged-chr1-185117468-1	Mark1 (-117919), Rab3gap2 (-86700)
chr1	185351787	185351959	Merged-chr1-185351873-2	Eprs (-11222), Bpnt1 (+19724)
chr1	185984877	185985049	Merged-chr1-185984963-2	Lyplal1 (+132347), Slc30a10 (+530115)
chr1	186749319	186749491	Merged-chr1-186749405-2	Rrp15 (-47)
chr1	187171502	187171674	Merged-chr1-187171588-2	Spata17 (+43858), D1Pas1 (+204172)
chr1	187172107	187172279	Merged-chr1-187172193-2	Spata17 (+43253), D1Pas1 (+204777)
chr1	188682206	188682378	Merged-chr1-188682292-2	Kctd3 (+325548), Ush2a (+419258)
chr1	189142653	189142825	Merged-chr1-189142739-2	Kctd3 (-134899), Kcnk2 (+200614)
chr1	189747579	189747751	Merged-chr1-189747665-2	Ptpn14 (+19397), Smyd2 (+174698)
chr1	189991179	189991351	Merged-chr1-189991265-2	Smyd2 (-68902), Prox1 (+179415)
chr1	190161451	190161623	Merged-chr1-190161537-2	Smyd2 (-239174), Prox1 (+9143)
chr1	190168409	190168581	Merged-chr1-190168495-2	Smyd2 (-246132), Prox1 (+2185)
chr1	190448333	190448505	Merged-chr1-190448419-2	Prox1 (-277739), Rps6kc1 (+463351)
chr1	191268892	191269064	Merged-chr1-191268978-2	Atf3 (-85638), Nenf (+49216)
chr1	193036023	193036195	Merged-chr1-193036109-1	Syt14 (-411)
chr1	194032680	194032852	Merged-chr1-194032766-2	Camk1g (-662469), Plxna2 (-587063)
chr10	4301621	4301793	Merged-chr10-4301707-2	Akap12 (+35378), Zbtb2 (+86401)
chr10	7133147	7133319	Merged-chr10-7133233-2	Ipcef1 (-152857), Cnksr3 (+79004)
chr10	7149797	7149969	Merged-chr10-7149883-2	Ipcef1 (-169507), Cnksr3 (+62354)
chr10	8287436	8287608	Merged-chr10-8287522-2	Tab2 (-331292), Ust (+231303)
chr10	8297357	8297529	Merged-chr10-8297443-2	Tab2 (-341213), Ust (+221382)
chr10	10790590	10790762	Merged-chr10-10790676-2	Gm10944 (+109328), Grm1 (+291680)
chr10	13641868	13642040	Merged-chr10-13641954-2	Pex3 (-88815), Aig1 (+227003)
chr10	13995870	13996042	Merged-chr10-13995956-2	Gm10335 (-527106), Hivep2 (+29577)
chr10	14450195	14450367	Merged-chr10-14450281-1	Gm10335 (-72781), Hivep2 (+483902)
chr10	14967744	14967916	Merged-chr10-14967830-2	B230364G03Rik (-207110)
chr10	18495008	18495180	Merged-chr10-18495094-2	Hebp2 (+50982), Nhsl1 (+87419)
chr10	20297566	20297738	Merged-chr10-20297652-2	4933406P04Rik (+14642), Map7 (+148732)
chr10	25314217	25314389	Merged-chr10-25314303-1	Epb4.1l2 (-45495), Akap7 (-15139)
chr10	25533974	25534146	Merged-chr10-25534060-2	Smlr1 (+2212), Epb4.1l2 (+174262)
chr10	25708113	25708285	Merged-chr10-25708199-2	Smlr1 (-171927), Tmem200a (+370853)
chr10	26194973	26195145	Merged-chr10-26195059-2	Tmem200a (-116007), Samd3 (-34648)
chr10	27807883	27808055	Merged-chr10-27807969-2	Ptprk (-266851), Lama2 (-191027)
chr10	36484726	36484898	Merged-chr10-36484812-2	Amd2 (-772921), Hs3st5 (-22007)
chr10	37102784	37102956	Merged-chr10-37102870-1	Marcks (+36050), Hdac2 (+128326)
chr10	39967622	39967794	Merged-chr10-39967708-1	G630090E17Rik (-7555), BC021785 (+18931)
chr10	40258502	40258674	Merged-chr10-40258588-1	Gtf3c6 (-923)
chr10	41273140	41273312	Merged-chr10-41273226-1	Gpr6 (-200941), Fig4 (+30015)
chr10	41404353	41404525	Merged-chr10-41404439-2	Zbtb24 (-45957), Akd1 (+52728)
chr10	41552792	41552964	Merged-chr10-41552878-2	Cd164 (+33378), Ccdc162 (+156422)
chr10	42163674	42163846	Merged-chr10-42163760-2	Armc2 (-145380), Foxo3 (+112992)
chr10	44730795	44730967	Merged-chr10-44730881-2	Prep (-336325), Prdm1 (-272194)
chr10	47631634	47631806	Merged-chr10-47631720-2	NONE
chr10	52029527	52029699	Merged-chr10-52029613-2	Vgll2 (+7111), Ros1 (+165631)
chr10	57675891	57676063	Merged-chr10-57675977-2	Fabp7 (-108904), Pkib (+43996)
chr10	58223910	58224082	Merged-chr10-58223996-1	AW822073 (+1710), Smpdl3a (+429622)
chr10	58224595	58224767	Merged-chr10-58224681-1	AW822073 (+1025), Smpdl3a (+430307)
chr10	58231847	58232019	Merged-chr10-58231933-1	AW822073 (-6227), Gm4981 (+4727)
chr10	58232421	58232593	Merged-chr10-58232507-1	AW822073 (-6801), Gm4981 (+4153)
chr10	58239445	58239617	Merged-chr10-58239531-1	Gm4981 (-2871)
chr10	58924971	58925143	Merged-chr10-58925057-2	Sh3rf3 (+111599), Sept10 (+296790)
chr10	59879803	59879975	Merged-chr10-59879889-2	Dnajb12 (+314)
chr10	60188431	60188603	Merged-chr10-60188517-1	Chst3 (+30743), Spock2 (+82298)
chr10	61423411	61423583	Merged-chr10-61423497-2	Nodal (+5525), Eif4ebp2 (+29172)
chr10	62404954	62405126	Merged-chr10-62405040-2	Hk1 (-25132), Hkdc1 (+17451)
chr10	62866781	62866953	Merged-chr10-62866867-2	Ccar1 (-74499), Tet1 (+32251)
chr10	63272163	63272335	Merged-chr10-63272249-1	1700120B22Rik (-28101), Sirt1 (+109455)
chr10	64147794	64147966	Merged-chr10-64147880-2	Lrrtm3 (-57606)
chr10	67019103	67019275	Merged-chr10-67019189-2	Reep3 (+77799)
chr10	67549537	67549709	Merged-chr10-67549623-2	Ado (-668)
chr10	69208333	69208505	Merged-chr10-69208419-1	Rhobtb1 (-4775), A930033H14Rik (+4679)
chr10	70060121	70060293	Merged-chr10-70060207-2	Ccdc6 (-36914), Ank3 (+526435)
chr10	71292395	71292567	Merged-chr10-71292481-2	Ube2d1 (-7219), Cisd1 (+52473)
chr10	72588637	72588809	Merged-chr10-72588723-2	Zwint (-66172)
chr10	74935422	74935594	Merged-chr10-74935508-2	Gnaz (-31669)
chr10	74990019	74990191	Merged-chr10-74990105-2	Gnaz (+22928), Rtdr1 (+42481)
chr10	75764434	75764606	Merged-chr10-75764520-1	Cabin1 (-163)
chr10	75912949	75913121	Merged-chr10-75913035-1	Smarcb1 (+8582), Derl3 (+19637)
chr10	76067760	76067932	Merged-chr10-76067846-2	Zfp280b (+35192), Slc5a4b (+43115)
chr10	76426523	76426695	Merged-chr10-76426609-2	Dip2a (-81349), Pcnt (+16303)
chr10	77130094	77130266	Merged-chr10-77130180-2	Pofut2 (-129120), Col18a1 (-16475)
chr10	77139350	77139522	Merged-chr10-77139436-1	Pofut2 (-119864), Col18a1 (-25731)
chr10	77197481	77197653	Merged-chr10-77197567-2	Col18a1 (-83862), Pofut2 (-61733)
chr10	77690514	77690686	Merged-chr10-77690600-2	Gm19402 (+157)
chr10	77742361	77742533	Merged-chr10-77742447-2	Gm10100 (+15961), Gm3233 (+17235)
chr10	77798967	77799139	Merged-chr10-77799053-2	Gm19668 (+80)
chr10	77814732	77814904	Merged-chr10-77814818-2	Gm9507 (-2975), Gm2696 (+136)
chr10	77836012	77836184	Merged-chr10-77836098-2	Gm10318 (-16764), Tspear (+6631)
chr10	78261010	78261182	Merged-chr10-78261096-1	Trappc10 (-16454), Agpat3 (+91346)
chr10	78399142	78399314	Merged-chr10-78399228-2	Gm10146 (+5919), Rrp1 (+13815)
chr10	79937153	79937325	Merged-chr10-79937239-2	Wdr18 (-22913), Arid3a (+10196)
chr10	80045881	80046053	Merged-chr10-80045967-1	Gpx4 (-8070), Polr2e (-6172)
chr10	80161601	80161773	Merged-chr10-80161687-1	Cirbp (-6091), Midn (+13415)
chr10	81037135	81037307	Merged-chr10-81037221-2	Slc39a3 (+205)
chr10	81242130	81242302	Merged-chr10-81242216-1	Matk (-15083), Zfr2 (+9061)
chr10	81334457	81334629	Merged-chr10-81334543-1	Tbxa2r (+5811), Gipc3 (+8723)
chr10	81564956	81565128	Merged-chr10-81565042-1	Tle2 (-10490), Aes (+5548)
chr10	81570971	81571143	Merged-chr10-81571057-2	Tle2 (-4475)
chr10	82241295	82241467	Merged-chr10-82241381-2	Zfp938 (-108)
chr10	83168849	83169021	Merged-chr10-83168935-1	Slc41a2 (+168947), Chst11 (+183437)
chr10	83844817	83844989	Merged-chr10-83844903-2	1500009L16Rik (+122038), Nuak1 (+595694)
chr10	84527585	84527757	Merged-chr10-84527671-2	Nuak1 (-87074), Ckap4 (+6217)
chr10	85328054	85328226	Merged-chr10-85328140-2	Btbd11 (-58674), Gm8394 (+14652)
chr10	85421385	85421557	Merged-chr10-85421471-2	Pwp1 (-450360), Btbd11 (+34657)
chr10	85507477	85507649	Merged-chr10-85507563-2	Pwp1 (-364268), Btbd11 (+120749)
chr10	85539504	85539676	Merged-chr10-85539590-2	Pwp1 (-332241), Btbd11 (+152776)
chr10	88771389	88771561	Merged-chr10-88771475-1	Arl1 (+40407), Utp20 (+55339)
chr10	90826878	90827050	Merged-chr10-90826964-2	Apaf1 (+255806), Anks1b (+953455)
chr10	90904234	90904406	Merged-chr10-90904320-2	Apaf1 (+178450)
chr10	91177224	91177396	Merged-chr10-91177310-2	Tmpo (-5728)
chr10	91678725	91678897	Merged-chr10-91678811-2	Tmpo (-507229)
chr10	92719964	92720136	Merged-chr10-92720050-2	Nedd1 (+2370)
chr10	94515161	94515333	Merged-chr10-94515247-2	Tmcc3 (+390)
chr10	95761971	95762143	Merged-chr10-95762057-2	Anapc15-ps (-88606), 4732465J04Rik (-30514)
chr10	95898907	95899079	Merged-chr10-95898993-2	Eea1 (-41670), 4732465J04Rik (+106422)
chr10	96309183	96309355	Merged-chr10-96309269-2	Gm20091 (+99769), Gm5426 (+172666)
chr10	99132311	99132483	Merged-chr10-99132397-2	Dusp6 (-130834), Phxr2 (-6076)
chr10	110854895	110855067	Merged-chr10-110854981-2	Csrp2 (-65196), E2f7 (+109513)
chr10	110856137	110856309	Merged-chr10-110856223-2	Csrp2 (-63954), E2f7 (+110755)
chr10	111696885	111697057	Merged-chr10-111696971-2	Krr1 (-275693), Phlda1 (+190685)
chr10	115774603	115774775	Merged-chr10-115774689-1	Lgr5 (-186909), Tspan8 (-42595)
chr10	116931071	116931243	Merged-chr10-116931157-2	Myrfl (-34278), Rab3ip (+19223)
chr10	117376940	117377112	Merged-chr10-117377026-1	Cpsf6 (-56)
chr10	117571631	117571803	Merged-chr10-117571717-1	Cpsf6 (-194747), Cpm (-57783)
chr10	118034534	118034706	Merged-chr10-118034620-2	Rap1b (-188685), Mdm1 (-107167)
chr10	118121996	118122168	Merged-chr10-118122082-2	Rap1b (-276147), Mdm1 (-19705)
chr10	120957547	120957719	Merged-chr10-120957633-2	Msrb3 (-58532), Lemd3 (+21699)
chr10	121742426	121742598	Merged-chr10-121742512-2	BC048403 (+2575), Srgap1 (+304803)
chr10	121843333	121843505	Merged-chr10-121843419-2	BC048403 (+103482), Srgap1 (+203896)
chr10	122033378	122033550	Merged-chr10-122033464-2	Srgap1 (+13851), BC048403 (+293527)
chr10	122583013	122583185	Merged-chr10-122583099-2	Ppm1h (-95683), Avpr1a (+134600)
chr10	123032190	123032362	Merged-chr10-123032276-2	Mon2 (+44229), Ppm1h (+353494)
chr10	123980520	123980692	Merged-chr10-123980606-2	Fam19a2 (+716530)
chr10	125906570	125906742	Merged-chr10-125906656-2	Slc16a7 (-577693), Lrig3 (-59563)
chr10	125919089	125919261	Merged-chr10-125919175-2	Slc16a7 (-590212), Lrig3 (-47044)
chr10	126067009	126067181	Merged-chr10-126067095-2	Lrig3 (+100876), Xrcc6bp1 (+834276)
chr10	126979353	126979525	Merged-chr10-126979439-1	Ctdsp2 (+722)
chr10	126984718	126984890	Merged-chr10-126984804-2	Avil (-15905), Ctdsp2 (+6087)
chr10	127082095	127082267	Merged-chr10-127082181-2	Agap2 (+3274), Os9 (+38979)
chr10	127084134	127084306	Merged-chr10-127084220-2	Agap2 (+5313), Os9 (+36940)
chr10	127090856	127091028	Merged-chr10-127090942-1	Agap2 (+12035), Os9 (+30218)
chr10	128035431	128035603	Merged-chr10-128035517-2	Naca (+171)
chr10	128526057	128526229	Merged-chr10-128526143-2	Esyt1 (-284)
chr10	128590306	128590478	Merged-chr10-128590392-1	Erbb3 (-740)
chr10	128909750	128909922	Merged-chr10-128909836-2	Cd63 (+917)
chr10	130259504	130259676	Merged-chr10-130259590-2	Olfr827 (-48441), Neurod4 (+20650)
chr11	4147206	4147378	Merged-chr11-4147292-2	Rnf215 (+12090), Ccdc157 (+12999)
chr11	4494502	4494674	Merged-chr11-4494588-1	Hormad2 (-53843), Mtmr3 (+100227)
chr11	5130444	5130616	Merged-chr11-5130530-2	Ewsr1 (-31264), Emid1 (+21727)
chr11	5741287	5741459	Merged-chr11-5741373-2	Urgcp (-223)
chr11	5762102	5762274	Merged-chr11-5762188-2	Dbnl (-26334), Urgcp (-21038)
chr11	5803671	5803843	Merged-chr11-5803757-1	Pgam2 (-24)
chr11	5846932	5847104	Merged-chr11-5847018-2	Aebp1 (-14929), Polm (-9002)
chr11	5887363	5887535	Merged-chr11-5887449-2	Pold2 (-9157), Myl7 (+11333)
chr11	6177494	6177666	Merged-chr11-6177580-1	Camk2b (-111832), Nudcd3 (+22835)
chr11	6292072	6292244	Merged-chr11-6292158-1	Ogdh (+490)
chr11	6481728	6481900	Merged-chr11-6481814-2	Purb (-5738), Myo1g (+39144)
chr11	7468394	7468566	Merged-chr11-7468480-2	Igfbp3 (-254583)
chr11	8492060	8492232	Merged-chr11-8492146-1	Tns3 (+172389)
chr11	8568210	8568382	Merged-chr11-8568296-1	Tns3 (+96239)
chr11	9131939	9132111	Merged-chr11-9132025-2	Abca13 (-59917), Upp1 (+13922)
chr11	9263141	9263313	Merged-chr11-9263227-2	Abca13 (+71285)
chr11	9784641	9784813	Merged-chr11-9784727-2	Abca13 (+592785)
chr11	11855124	11855296	Merged-chr11-11855210-2	Fignl1 (-46248), Ddc (+42934)
chr11	11857083	11857255	Merged-chr11-11857169-2	Fignl1 (-48207), Ddc (+40975)
chr11	13006587	13006759	Merged-chr11-13006673-2	Cobl (-541716)
chr11	13010209	13010381	Merged-chr11-13010295-2	Cobl (-545338)
chr11	19631148	19631320	Merged-chr11-19631234-2	Meis1 (-612520), Spred2 (-293208)
chr11	19836183	19836355	Merged-chr11-19836269-1	Meis1 (-817555), Spred2 (-88173)
chr11	19851383	19851555	Merged-chr11-19851469-2	Meis1 (-832755), Spred2 (-72973)
chr11	20145505	20145677	Merged-chr11-20145591-2	Rab1 (-56011), Actr2 (-32678)
chr11	20585899	20586071	Merged-chr11-20585985-2	Sertad2 (+42651), Aftph (+155604)
chr11	22372840	22373012	Merged-chr11-22372926-2	Tmem17 (-139162), Ehbp1 (-86131)
chr11	25100075	25100247	Merged-chr11-25100161-2	5730522E02Rik (+670409)
chr11	26112305	26112477	Merged-chr11-26112391-1	5730522E02Rik (-341821), 5730522E02Rik (+98175)
chr11	26371953	26372125	Merged-chr11-26372039-2	5730522E02Rik (-161473), Fancl (-14096)
chr11	28948421	28948593	Merged-chr11-28948507-1	Pnpt1 (-182241), Efemp1 (+95303)
chr11	29636950	29637122	Merged-chr11-29637036-2	Rps27a (-88927), Rtn4 (-55911)
chr11	29638368	29638540	Merged-chr11-29638454-2	Rps27a (-90345), Rtn4 (-54493)
chr11	29774405	29774577	Merged-chr11-29774491-2	4931440F15Rik (+51177), Rtn4 (+81544)
chr11	31870896	31871068	Merged-chr11-31870982-2	Cpeb4 (-1229)
chr11	32000304	32000476	Merged-chr11-32000390-2	Nsg2 (-73)
chr11	32718560	32718732	Merged-chr11-32718646-2	Fbxw11 (+75771), 1700008A04Rik (+105959)
chr11	33110204	33110376	Merged-chr11-33110290-2	1700008A04Rik (-285685), Fgf18 (+37110)
chr11	33607860	33608032	Merged-chr11-33607946-1	D130052B06Rik (+8644), Kcnip1 (+235639)
chr11	35610254	35610426	Merged-chr11-35610340-2	Pank3 (-159144), Slit3 (+489116)
chr11	36317864	36318036	Merged-chr11-36317950-2	Wwc1 (-337423), Tenm2 (+917932)
chr11	40050604	40050776	Merged-chr11-40050690-2	Mat2b (+642084)
chr11	41645169	41645341	Merged-chr11-41645255-2	Ccng1 (-889944), Gabrg2 (+355423)
chr11	43653193	43653365	Merged-chr11-43653279-1	Fabp6 (-51739), Pwwp2a (-28719)
chr11	44333556	44333728	Merged-chr11-44333642-1	Adra1b (-432432), Il12b (-66421)
chr11	49739093	49739265	Merged-chr11-49739179-2	Gfpt2 (-55008), Cnot6 (-26469)
chr11	51619802	51619974	Merged-chr11-51619888-1	Nhp2 (+153)
chr11	51659418	51659590	Merged-chr11-51659504-2	D930048N14Rik (+8548), 0610009B22Rik (+29370)
chr11	51844869	51845041	Merged-chr11-51844955-2	Phf15 (+12698), Sar1b (+81268)
chr11	52014322	52014494	Merged-chr11-52014408-2	Ppp2ca (-84273), Cdkl3 (+10118)
chr11	52360705	52360877	Merged-chr11-52360791-1	Vdac1 (-69)
chr11	52479651	52479823	Merged-chr11-52479737-2	Fstl4 (-284897), 9530068E07Rik (+83309)
chr11	52764484	52764656	Merged-chr11-52764570-2	Fstl4 (-64)
chr11	52919522	52919694	Merged-chr11-52919608-2	Fstl4 (+154974), Hspa4 (+380849)
chr11	53749749	53749921	Merged-chr11-53749835-2	Irf1 (-20179), Il5 (+29041)
chr11	54696024	54696196	Merged-chr11-54696110-1	Cdc42se2 (+91565), Rapgef6 (+173263)
chr11	55264450	55264622	Merged-chr11-55264536-2	Slc36a1 (+60186), Fat2 (+72028)
chr11	55810826	55810998	Merged-chr11-55810912-1	Glra1 (-202714), Nmur2 (+230098)
chr11	57912037	57912209	Merged-chr11-57912123-2	Larp1 (-96941), Hand1 (-79976)
chr11	58136392	58136564	Merged-chr11-58136478-1	Gemin5 (+32061), Cnot8 (+32249)
chr11	59161520	59161692	Merged-chr11-59161606-2	Obscn (-25231), Iba57 (+2133)
chr11	59640321	59640493	Merged-chr11-59640407-2	Mprip (-22088), Olfr225 (+27441)
chr11	60161393	60161565	Merged-chr11-60161479-2	Rai1 (+56466), Srebf1 (+59125)
chr11	60319710	60319882	Merged-chr11-60319796-2	Srebf1 (-99192), Tom1l2 (+33109)
chr11	60494405	60494577	Merged-chr11-60494491-2	Alkbh5 (-43487), Myo15 (+25152)
chr11	60722764	60722936	Merged-chr11-60722850-2	Flii (+4413), Llgl1 (+23127)
chr11	60941501	60941673	Merged-chr11-60941587-2	Kcnj12 (-124217), Map2k3 (+9554)
chr11	61081662	61081834	Merged-chr11-61081748-2	Tnfrsf13b (-45007), Kcnj12 (+15944)
chr11	61529310	61529482	Merged-chr11-61529396-2	B9d1 (+24252), Epn2 (+50291)
chr11	63160825	63160997	Merged-chr11-63160911-1	Pmp22 (+31929), Hs3st3b1 (+761379)
chr11	65053160	65053332	Merged-chr11-65053246-2	Elac2 (+74208), 1700086D15Rik (+106644)
chr11	65158740	65158912	Merged-chr11-65158826-1	1700086D15Rik (+1064), Elac2 (+179788)
chr11	65713012	65713184	Merged-chr11-65713098-1	Myocd (-443109), Map2k4 (+75199)
chr11	66932944	66933116	Merged-chr11-66933030-2	Tmem220 (-92124), Pirt (+21049)
chr11	67081253	67081425	Merged-chr11-67081339-1	Myh2 (-89688), Myh3 (+3039)
chr11	68385385	68385557	Merged-chr11-68385471-1	Ntn1 (+15352), Stx8 (+419278)
chr11	68555978	68556150	Merged-chr11-68556064-2	Mfsd6l (-122)
chr11	68985328	68985500	Merged-chr11-68985414-2	Rangrf (-11571), Pfas (+23046)
chr11	69073401	69073573	Merged-chr11-69073487-1	Vamp2 (-15003), Tmem107 (+2676)
chr11	69362100	69362272	Merged-chr11-69362186-2	Chd3 (+7220), Kcnab3 (+35928)
chr11	69459940	69460112	Merged-chr11-69460026-2	Kdm6b (-46351), Dnahc2 (+89082)
chr11	70652238	70652410	Merged-chr11-70652324-2	Eno3 (-4880), Pfn1 (+2320)
chr11	70724533	70724705	Merged-chr11-70724619-1	Zfp3 (-39590), Kif1c (+24071)
chr11	70764329	70764501	Merged-chr11-70764415-2	Zfp3 (+206)
chr11	71513029	71513201	Merged-chr11-71513115-2	Nlrp1b (-311659), Wscd1 (-238261)
chr11	71751233	71751405	Merged-chr11-71751319-1	Wscd1 (-57)
chr11	72274090	72274262	Merged-chr11-72274176-2	Xaf1 (-27454), Slc13a5 (-7574)
chr11	72406532	72406704	Merged-chr11-72406618-2	Tekt1 (-44176), Smtnl2 (+5095)
chr11	73084009	73084181	Merged-chr11-73084095-2	Itgae (-6488), 1200014J11Rik (+36312)
chr11	74584975	74585147	Merged-chr11-74585061-1	Rap1gap2 (+5125), Olfr412 (+220390)
chr11	74619195	74619367	Merged-chr11-74619281-1	E130309D14Rik (-324)
chr11	74858658	74858830	Merged-chr11-74858744-1	Mnt (+27824), Sgsm2 (+38316)
chr11	75165447	75165619	Merged-chr11-75165533-2	Hic1 (+3986), Smg6 (+239710)
chr11	75400306	75400478	Merged-chr11-75400392-2	Serpinf1 (+22309), Smyd4 (+51959)
chr11	76287363	76287535	Merged-chr11-76287449-2	Glod4 (-43724), Nxn (+111691)
chr11	76328926	76329098	Merged-chr11-76329012-2	Glod4 (-85287), Nxn (+70128)
chr11	76349903	76350075	Merged-chr11-76349989-1	Glod4 (-106264), Nxn (+49151)
chr11	76351135	76351307	Merged-chr11-76351221-1	Glod4 (-107496), Nxn (+47919)
chr11	77446845	77447017	Merged-chr11-77446931-2	Coro6 (-15480), Ssh2 (+230644)
chr11	77462500	77462672	Merged-chr11-77462586-1	Coro6 (+175)
chr11	77488747	77488919	Merged-chr11-77488833-1	Git1 (-4729), Ankrd13b (+845)
chr11	77763821	77763993	Merged-chr11-77763907-1	Cryba1 (-38624), Myo18a (-8244)
chr11	77965565	77965737	Merged-chr11-77965651-1	Phf12 (-17151), Sez6 (+34851)
chr11	78169198	78169370	Merged-chr11-78169284-2	Traf4 (-3695)
chr11	78411303	78411475	Merged-chr11-78411389-2	Foxn1 (-24831), Slc13a2 (+10828)
chr11	79327079	79327251	Merged-chr11-79327165-1	Gm9964 (-30259), Nf1 (-12660)
chr11	79593625	79593797	Merged-chr11-79593711-2	Rab11fip4 (+2499), Utp6 (+368679)
chr11	80178122	80178294	Merged-chr11-80178208-2	Rnf135 (-5643), Adap2 (+24103)
chr11	80411145	80411317	Merged-chr11-80411231-2	Psmd11 (-17394), Zfp207 (+27834)
chr11	80508895	80509067	Merged-chr11-80508981-2	Cdk5r1 (+31935), Myo1d (+271044)
chr11	80512425	80512597	Merged-chr11-80512511-2	Cdk5r1 (+35465), Myo1d (+267514)
chr11	81616548	81616720	Merged-chr11-81616634-2	Asic2 (-463313), 5530401A14Rik (-244045)
chr11	82902017	82902189	Merged-chr11-82902103-2	Nle1 (+6308), Fndc8 (+9979)
chr11	83233703	83233875	Merged-chr11-83233789-2	Slfn3 (+42459), Pex12 (+65188)
chr11	84332944	84333116	Merged-chr11-84333030-2	Acaca (+159908), Aatf (+180492)
chr11	84570619	84570791	Merged-chr11-84570705-2	Lhx1 (-44690), Mrm1 (+248810)
chr11	85658556	85658728	Merged-chr11-85658642-2	Tbx2 (-173909), Bcas3 (+305430)
chr11	85969516	85969688	Merged-chr11-85969602-2	Tbx4 (+83180), Brip1 (+231591)
chr11	86051540	86051712	Merged-chr11-86051626-2	Brip1 (+149567), Tbx4 (+165204)
chr11	87276663	87276835	Merged-chr11-87276749-2	Ppm1e (+82274), Trim37 (+149672)
chr11	87422773	87422945	Merged-chr11-87422859-1	Gm11492 (-143794), Tex14 (+17794)
chr11	88139498	88139670	Merged-chr11-88139584-1	Mrps23 (-64804), Cuedc1 (+40438)
chr11	88179829	88180001	Merged-chr11-88179915-2	Mrps23 (-24473), Cuedc1 (+80769)
chr11	88252943	88253115	Merged-chr11-88253029-2	1700106J16Rik (-41014), Mrps23 (+48641)
chr11	88381222	88381394	Merged-chr11-88381308-2	1700106J16Rik (+87265), Msi2 (+336793)
chr11	88689785	88689957	Merged-chr11-88689871-2	Msi2 (+28230), 1700106J16Rik (+395828)
chr11	88758495	88758667	Merged-chr11-88758581-2	Msi2 (-40480), Akap1 (+106005)
chr11	88974000	88974172	Merged-chr11-88974086-2	Coil (+151)
chr11	94163056	94163228	Merged-chr11-94163142-2	Tob1 (-48312), Spag9 (+167039)
chr11	94986655	94986827	Merged-chr11-94986741-2	Ppp1r9b (-4294)
chr11	95315580	95315752	Merged-chr11-95315666-1	Fam117a (-21352), Kat7 (-5420)
chr11	95645254	95645426	Merged-chr11-95645340-1	Ngfr (-57605), Phb (-21617)
chr11	95990995	95991167	Merged-chr11-95991081-1	B4galnt2 (-76190), Igf2bp1 (+14859)
chr11	96307815	96307987	Merged-chr11-96307901-1	Hoxb4 (-8783), Hoxb5 (+5306)
chr11	96509334	96509506	Merged-chr11-96509420-2	Skap1 (+44827), Snx11 (+268111)
chr11	96900001	96900173	Merged-chr11-96900087-2	Cdk5rap3 (+16409), Copz2 (+50211)
chr11	96929271	96929443	Merged-chr11-96929357-2	Prr15l (+33)
chr11	96956201	96956373	Merged-chr11-96956287-1	Pnpo (-12301), Sp2 (+21401)
chr11	96957417	96957589	Merged-chr11-96957503-2	Pnpo (-13517), Sp2 (+20185)
chr11	97280701	97280873	Merged-chr11-97280787-1	Npepps (-149)
chr11	97377897	97378069	Merged-chr11-97377983-1	Arhgap23 (-72177), Socs7 (+15432)
chr11	97661708	97661880	Merged-chr11-97661794-2	Mllt6 (-1620)
chr11	98180150	98180322	Merged-chr11-98180236-2	Fbxl20 (-30624), Med1 (+13057)
chr11	98446840	98447012	Merged-chr11-98446926-2	Grb7 (+92)
chr11	98457586	98457758	Merged-chr11-98457672-1	Grb7 (+10838), Ikzf3 (+88128)
chr11	98840028	98840200	Merged-chr11-98840114-2	Wipf2 (-23524), Rapgefl1 (+3329)
chr11	98964720	98964892	Merged-chr11-98964806-2	Gjd3 (+18210), Rara (+27088)
chr11	99580799	99580971	Merged-chr11-99580885-2	Krtap1-5 (+131)
chr11	99583369	99583541	Merged-chr11-99583455-2	Krtap1-5 (-2439), Krtap1-4 (+199)
chr11	99591109	99591281	Merged-chr11-99591195-2	Krtap1-3 (+144)
chr11	99597860	99598032	Merged-chr11-99597946-2	Krtap9-3 (+159)
chr11	99614355	99614527	Merged-chr11-99614441-2	Gm11937 (-4252), Krtap2-4 (+405)
chr11	99627902	99628074	Merged-chr11-99627988-2	Krtap4-1 (+251)
chr11	99634788	99634960	Merged-chr11-99634874-2	Krtap4-2 (+210)
chr11	99643711	99643883	Merged-chr11-99643797-2	Krtap4-7 (+292)
chr11	99658564	99658736	Merged-chr11-99658650-2	Gm11563 (+309)
chr11	99665558	99665730	Merged-chr11-99665644-2	Krtap4-6 (+316)
chr11	99680555	99680727	Merged-chr11-99680641-2	Gm14187 (+91)
chr11	99699531	99699703	Merged-chr11-99699617-2	Gm14192 (-3219), Gm14184 (+57)
chr11	99704992	99705164	Merged-chr11-99705078-2	Gm14183 (+69)
chr11	99718830	99719002	Merged-chr11-99718916-2	Gm14196 (-8698), Gm14185 (+5430)
chr11	99758947	99759119	Merged-chr11-99759033-2	Gm14181 (-2752), Gm14194 (+139)
chr11	99772545	99772717	Merged-chr11-99772631-2	Gm11595 (+282)
chr11	99779989	99780161	Merged-chr11-99780075-1	Krtap4-8 (+629)
chr11	99785486	99785658	Merged-chr11-99785572-2	Krtap4-8 (-4868), Krtap4-9 (+372)
chr11	99792718	99792890	Merged-chr11-99792804-2	Gm11596 (+663)
chr11	99798387	99798559	Merged-chr11-99798473-2	Gm11569 (+459)
chr11	99804187	99804359	Merged-chr11-99804273-2	Gm11554 (+173)
chr11	99809620	99809792	Merged-chr11-99809706-2	Krtap4-13 (+190)
chr11	99815113	99815285	Merged-chr11-99815199-2	Gm11564 (+467)
chr11	99837419	99837591	Merged-chr11-99837505-2	2300003K06Rik (+561)
chr11	99846888	99847060	Merged-chr11-99846974-2	2300003K06Rik (-8908), Krtap4-16 (+4634)
chr11	99851265	99851437	Merged-chr11-99851351-2	Krtap4-16 (+257)
chr11	99858232	99858404	Merged-chr11-99858318-2	Gm11568 (+401)
chr11	99864762	99864934	Merged-chr11-99864848-2	Gm11559 (+372)
chr11	99873663	99873835	Merged-chr11-99873749-2	Krtap9-1 (+360)
chr11	99879435	99879607	Merged-chr11-99879521-2	Gm11567 (+334)
chr11	99948788	99948960	Merged-chr11-99948874-2	Krtap9-5 (+399)
chr11	99949349	99949521	Merged-chr11-99949435-2	Krtap9-5 (+960)
chr11	100256377	100256549	Merged-chr11-100256463-2	Krt16 (-7561), Krt17 (+4566)
chr11	100297975	100298147	Merged-chr11-100298061-2	Krt42 (-28190), Eif1 (-21824)
chr11	100355688	100355860	Merged-chr11-100355774-2	Hap1 (+354)
chr11	100728723	100728895	Merged-chr11-100728809-2	Rab5c (+9406), Hspb9 (+14959)
chr11	101163719	101163891	Merged-chr11-101163805-1	Plekhh3 (+7546), Tubg2 (+7898)
chr11	101334603	101334775	Merged-chr11-101334689-2	G6pc (-32872), Aoc3 (+4084)
chr11	101351787	101351959	Merged-chr11-101351873-2	G6pc (-15688), Aoc3 (+21268)
chr11	101411330	101411502	Merged-chr11-101411416-2	Aarsd1 (+6199), G6pc (+43855)
chr11	101984243	101984415	Merged-chr11-101984329-2	1700006E09Rik (-2727), Dusp3 (+2684)
chr11	102375246	102375418	Merged-chr11-102375332-2	Slc4a1 (-10052), Slc25a39 (+32212)
chr11	102394492	102394664	Merged-chr11-102394578-2	Slc4a1 (-29298), Slc25a39 (+12966)
chr11	103003326	103003498	Merged-chr11-103003412-2	C1ql1 (-56724), Dcakd (+13756)
chr11	103656592	103656764	Merged-chr11-103656678-1	Rprml (+7169), Gosr2 (+41220)
chr11	103730605	103730777	Merged-chr11-103730691-1	Gosr2 (-32793), Wnt9b (+19130)
chr11	104059295	104059467	Merged-chr11-104059381-1	Crhr1 (-73474), Arf2 (+92510)
chr11	104137931	104138103	Merged-chr11-104138017-2	Sppl2c (-48310), Crhr1 (+5162)
chr11	104528244	104528416	Merged-chr11-104528330-1	Kansl1 (-86039), Cdc27 (+22153)
chr11	104536885	104537057	Merged-chr11-104536971-1	Kansl1 (-94680), Cdc27 (+13512)
chr11	104972565	104972737	Merged-chr11-104972651-1	Efcab3 (-119555), Gm11639 (+286944)
chr11	106674666	106674838	Merged-chr11-106674752-2	Tex2 (-61822), Pecam1 (+40507)
chr11	106869012	106869184	Merged-chr11-106869098-1	Smurf2 (+51372), Cep95 (+79823)
chr11	107135904	107136076	Merged-chr11-107135990-2	Bptf (-4068)
chr11	108119913	108120085	Merged-chr11-108119999-2	Cacng5 (-204944), Prkca (+223929)
chr11	109472579	109472751	Merged-chr11-109472665-1	Arsg (-709), Slc16a6 (+933)
chr11	113203511	113203683	Merged-chr11-113203597-2	Slc39a11 (+362162), Sox9 (+421373)
chr11	113232113	113232285	Merged-chr11-113232199-1	Slc39a11 (+333560), Sox9 (+449975)
chr11	114175824	114175996	Merged-chr11-114175910-2	Rpl38 (-492699), Sdk2 (-109692)
chr11	114333941	114334113	Merged-chr11-114334027-2	Rpl38 (-334582), Sdk2 (-267809)
chr11	114795348	114795520	Merged-chr11-114795434-2	Gpr142 (-3490), Btbd17 (+463)
chr11	114807126	114807298	Merged-chr11-114807212-2	Gprc5c (-44630), Gpr142 (+8288)
chr11	115258228	115258400	Merged-chr11-115258314-2	Grin2c (+8929), Tmem104 (+70827)
chr11	115294361	115294533	Merged-chr11-115294447-2	Fdxr (-17397), Fads6 (+3067)
chr11	115357539	115357711	Merged-chr11-115357625-2	Hid1 (+10131), Otop3 (+22891)
chr11	115441511	115441683	Merged-chr11-115441597-2	Slc16a5 (-20881), 4933422H20Rik (+1052)
chr11	115763756	115763928	Merged-chr11-115763842-1	2310067B10Rik (-1591)
chr11	115798496	115798668	Merged-chr11-115798582-2	Caskin2 (+15048), 2310067B10Rik (+33149)
chr11	116124021	116124193	Merged-chr11-116124107-2	Trim47 (-13861), Trim65 (+7019)
chr11	116140998	116141170	Merged-chr11-116141084-2	Mrpl38 (-2216)
chr11	116187576	116187748	Merged-chr11-116187662-2	Fbf1 (-19509), Ten1 (-11193)
chr11	116766607	116766779	Merged-chr11-116766693-1	St6galnac2 (-71825), St6galnac1 (+8814)
chr11	116853671	116853843	Merged-chr11-116853757-1	Srsf2 (-663), Mfsd11 (-63)
chr11	116972880	116973052	Merged-chr11-116972966-1	Sec14l1 (-142206), Mgat5b (+54103)
chr11	117296526	117296698	Merged-chr11-117296612-2	Gm11733 (-187756), Sept9 (+96951)
chr11	117403936	117404108	Merged-chr11-117404022-2	Gm11733 (-80346), Sept9 (+204361)
chr11	117438450	117438622	Merged-chr11-117438536-2	Gm11733 (-45832), Sept9 (+238875)
chr11	117451666	117451838	Merged-chr11-117451752-2	Gm11733 (-32616), Sept9 (+252091)
chr11	117545029	117545201	Merged-chr11-117545115-2	Tnrc6c (-109698), Gm11733 (+60747)
chr11	117930853	117931025	Merged-chr11-117930939-2	Tha1 (-57480), Socs3 (+38247)
chr11	117934406	117934578	Merged-chr11-117934492-1	Tha1 (-61033), Socs3 (+34694)
chr11	117952263	117952435	Merged-chr11-117952349-2	Tha1 (-78890), Socs3 (+16837)
chr11	117986108	117986280	Merged-chr11-117986194-2	Pgs1 (-98)
chr11	118140725	118140897	Merged-chr11-118140811-2	Dnahc17 (-11592), Cyth1 (+71931)
chr11	118170830	118171002	Merged-chr11-118170916-2	Dnahc17 (-41697), Cyth1 (+41826)
chr11	118202556	118202728	Merged-chr11-118202642-1	Dnahc17 (-73423), Cyth1 (+10100)
chr11	118892756	118892928	Merged-chr11-118892842-1	Rbfox3 (+16730), Engase (+416013)
chr11	119282620	119282792	Merged-chr11-119282706-2	Gaa (+14819), Eif4a3 (+17383)
chr11	119585921	119586093	Merged-chr11-119586007-2	Nptx1 (-38254), Rptor (-17142)
chr11	119690034	119690206	Merged-chr11-119690120-2	Chmp6 (-223690), Rptor (+86971)
chr11	119991459	119991631	Merged-chr11-119991545-2	Baiap2 (+48782), Aatk (+55525)
chr11	120269577	120269749	Merged-chr11-120269663-1	Bahcc1 (+36716), Actg1 (+78879)
chr11	120658918	120659090	Merged-chr11-120659004-2	Myadml2 (-10846), Notum (+1602)
chr11	120985674	120985846	Merged-chr11-120985760-2	Csnk1d (+5570), Slc16a3 (+36679)
chr12	3806293	3806465	Merged-chr12-3806379-1	Dnmt3a (-651)
chr12	9358927	9359099	Merged-chr12-9359013-2	Osr1 (-215429), Ttc32 (+329016)
chr12	12904766	12904938	Merged-chr12-12904852-1	Rpl36-ps3 (-7134), Fam49a (+642713)
chr12	12995295	12995467	Merged-chr12-12995381-2	Mycn (-53467), Ddx1 (+253832)
chr12	20230967	20231139	Merged-chr12-20231053-1	Gm10479 (-184885), Gm3993 (+159171)
chr12	25093038	25093210	Merged-chr12-25093124-2	Id2 (+2968), Kidins220 (+118192)
chr12	25098705	25098877	Merged-chr12-25098791-2	Id2 (-2699)
chr12	25144742	25144914	Merged-chr12-25144828-2	Id2 (-48736)
chr12	25475537	25475709	Merged-chr12-25475623-2	Id2 (-379531), Rnf144a (+939633)
chr12	25702322	25702494	Merged-chr12-25702408-2	Id2 (-606316), Rnf144a (+712848)
chr12	26068245	26068417	Merged-chr12-26068331-2	Id2 (-972239), Rnf144a (+346925)
chr12	26315106	26315278	Merged-chr12-26315192-2	Rnf144a (+100064)
chr12	27140369	27140541	Merged-chr12-27140455-2	Sox11 (+202254), Cmpk2 (+671251)
chr12	28507194	28507366	Merged-chr12-28507280-2	Dcdc2c (+45023)
chr12	28817508	28817680	Merged-chr12-28817594-2	Myt1l (-710790), Tssc1 (+65766)
chr12	29096106	29096278	Merged-chr12-29096192-2	Myt1l (-432192), Tssc1 (+344364)
chr12	29130144	29130316	Merged-chr12-29130230-2	Myt1l (-398154), Tssc1 (+378402)
chr12	32500191	32500363	Merged-chr12-32500277-2	Nampt (-320058), Ccdc71l (+121488)
chr12	35313289	35313461	Merged-chr12-35313375-2	Ahr (+221663), Snx13 (+266186)
chr12	39865242	39865414	Merged-chr12-39865328-1	Arl4a (+172101)
chr12	40222595	40222767	Merged-chr12-40222681-1	Gm7008 (-77), Ifrd1 (+508)
chr12	40917512	40917684	Merged-chr12-40917598-2	Immp2l (-106492), Dock4 (+471545)
chr12	44344219	44344391	Merged-chr12-44344305-2	Nrcam (+15420), Stxbp6 (+729807)
chr12	51166083	51166255	Merged-chr12-51166169-2	Prkd1 (-516946), G2e3 (-182119)
chr12	51764578	51764750	Merged-chr12-51764664-2	Strn3 (-72750), Hectd1 (+64872)
chr12	54326685	54326857	Merged-chr12-54326771-2	Egln3 (-122911), Sptssa (+329801)
chr12	54404269	54404441	Merged-chr12-54404355-2	Egln3 (-200495), Sptssa (+252217)
chr12	54696751	54696923	Merged-chr12-54696837-1	Eapp (-956)
chr12	54834983	54835155	Merged-chr12-54835069-2	Snx6 (-39366), Cfl2 (+27808)
chr12	56535073	56535245	Merged-chr12-56535159-2	Mbip (-189265), Nkx2-1 (+1749)
chr12	59040438	59040610	Merged-chr12-59040524-1	Trappc6b (+20937), Gemin2 (+27131)
chr12	65073837	65074009	Merged-chr12-65073923-2	Fancm (-1683), Fkbp3 (+21)
chr12	65206505	65206677	Merged-chr12-65206591-2	Mis18bp1 (-34011), Wdr20b (-18926)
chr12	70347132	70347304	Merged-chr12-70347218-1	Trim9 (+396)
chr12	71113041	71113213	Merged-chr12-71113127-1	Tomm20l (+1699), Timm9 (+23548)
chr12	73242054	73242226	Merged-chr12-73242140-2	Trmt5 (+44571), Mnat1 (+118423)
chr12	75890446	75890618	Merged-chr12-75890532-2	Syne2 (+72214), Esr2 (+286727)
chr12	78351010	78351182	Merged-chr12-78351096-1	Fam71d (-340439), Gphn (+124441)
chr12	78605982	78606154	Merged-chr12-78606068-2	Fam71d (-85467), Gphn (+379413)
chr12	80216556	80216728	Merged-chr12-80216642-2	Zfp36l1 (-103629), Actn1 (+43729)
chr12	80612316	80612488	Merged-chr12-80612402-1	Slc39a9 (-31813), Galnt16 (+93412)
chr12	81776282	81776454	Merged-chr12-81776368-1	Map3k9 (+4802), Ttc9 (+144999)
chr12	81787096	81787268	Merged-chr12-81787182-1	Pcnx (-72848), Map3k9 (-6012)
chr12	83608557	83608729	Merged-chr12-83608643-2	Rbm25 (-23609), Zfyve1 (-11496)
chr12	83848955	83849127	Merged-chr12-83849041-2	2410016O06Rik (-101567), Numb (-6698)
chr12	84114531	84114703	Merged-chr12-84114617-2	Dnalc1 (+251)
chr12	84198100	84198272	Merged-chr12-84198186-2	Elmsan1 (-4171)
chr12	85192938	85193110	Merged-chr12-85193024-2	Eif2b2 (-26457), Pgf (-15728)
chr12	85227294	85227466	Merged-chr12-85227380-2	Eif2b2 (+7899), Mlh3 (+43211)
chr12	85456867	85457039	Merged-chr12-85456953-1	Tmed10 (-82236), Fos (-16937)
chr12	86466306	86466478	Merged-chr12-86466392-2	Vash1 (-212308), Esrrb (+44748)
chr12	86525364	86525536	Merged-chr12-86525450-1	Vash1 (-153250), Esrrb (+103806)
chr12	86898087	86898259	Merged-chr12-86898173-1	2310044G17Rik (-49170), Irf2bpl (-13359)
chr12	94647384	94647556	Merged-chr12-94647470-1	Gm9726 (-718368)
chr12	99272788	99272960	Merged-chr12-99272874-2	Foxn3 (+120198), Ttc8 (+352262)
chr12	99505095	99505267	Merged-chr12-99505181-2	Foxn3 (-112109), Efcab11 (+378261)
chr12	100268204	100268376	Merged-chr12-100268290-1	Calm1 (+68855), Ttc7b (+252532)
chr12	100304366	100304538	Merged-chr12-100304452-2	Calm1 (+105017), Ttc7b (+216370)
chr12	100337728	100337900	Merged-chr12-100337814-2	Calm1 (+138379), Ttc7b (+183008)
chr12	100998085	100998257	Merged-chr12-100998171-2	Gpr68 (-89973), Ccdc88c (+30812)
chr12	100999453	100999625	Merged-chr12-100999539-2	Gpr68 (-91341), Ccdc88c (+29444)
chr12	102224174	102224346	Merged-chr12-102224260-2	Rin3 (-58788), Slc24a4 (+95086)
chr12	102344574	102344746	Merged-chr12-102344660-2	Rin3 (+61612), Lgmn (+95153)
chr12	102949750	102949922	Merged-chr12-102949836-1	Unc79 (+977)
chr12	103368832	103369004	Merged-chr12-103368918-2	Otub2 (-19764), Asb2 (-12917)
chr12	104644810	104644982	Merged-chr12-104644896-2	Dicer1 (+107056), Gm10000 (+170408)
chr12	105005590	105005762	Merged-chr12-105005676-2	Glrx5 (-27013), Syne3 (-6999)
chr12	105322340	105322512	Merged-chr12-105322426-1	D430019H16Rik (-131430), Tcl1 (-99689)
chr12	105550418	105550590	Merged-chr12-105550504-2	Bdkrb2 (-12668), D430019H16Rik (+96648)
chr12	108848097	108848269	Merged-chr12-108848183-2	Slc25a47 (-2946)
chr12	108994709	108994881	Merged-chr12-108994795-1	Begain (+73422), Wdr25 (+100478)
chr12	110559888	110560060	Merged-chr12-110559974-2	Dync1h1 (-41478), Ppp2r5c (+74235)
chr12	110566805	110566977	Merged-chr12-110566891-2	Dync1h1 (-34561), Ppp2r5c (+81152)
chr12	111021230	111021402	Merged-chr12-111021316-2	Ankrd9 (-42276), Rcor1 (-18482)
chr12	111136049	111136221	Merged-chr12-111136135-2	Traf3 (-30328), Rcor1 (+96337)
chr12	111531509	111531681	Merged-chr12-111531595-2	Gm266 (-45772), Eif5 (-6506)
chr12	111664461	111664633	Merged-chr12-111664547-2	Ckb (+7791), Mark3 (+90037)
chr12	111696322	111696494	Merged-chr12-111696408-2	Bag5 (+16849), Trmt61a (+18303)
chr12	112141463	112141635	Merged-chr12-112141549-2	Kif26a (-4686)
chr12	112164519	112164691	Merged-chr12-112164605-2	Kif26a (+18370), A730018C14Rik (+258607)
chr12	112206730	112206902	Merged-chr12-112206816-2	Kif26a (+60581), A730018C14Rik (+216396)
chr12	112325751	112325923	Merged-chr12-112325837-2	A730018C14Rik (+97375), Kif26a (+179602)
chr12	113140301	113140473	Merged-chr12-113140387-2	Crip2 (+151)
chr12	113335411	113335583	Merged-chr12-113335497-2	Adam6b (-154048), Ighg2c (-46567)
chr12	113715401	113715573	Merged-chr12-113715487-1	Adam6a (+171579)
chr12	115661429	115661601	Merged-chr12-115661515-2	Ighv1-73 (+129369)
chr12	120025333	120025505	Merged-chr12-120025419-1	Tmem196 (+79457)
chr13	3642126	3642298	Merged-chr13-3642212-2	Asb13 (+8180), Calml3 (+162106)
chr13	3712640	3712812	Merged-chr13-3712726-2	Asb13 (+78694), Calml3 (+91592)
chr13	6000318	6000490	Merged-chr13-6000404-2	Pitrm1 (-547753), Klf6 (+138915)
chr13	9329484	9329656	Merged-chr13-9329570-2	Dip2c (+53042), Zmynd11 (+435744)
chr13	9834262	9834434	Merged-chr13-9834348-1	Zmynd11 (-69034), Chrm3 (+44650)
chr13	11959659	11959831	Merged-chr13-11959745-2	Ryr2 (+147200)
chr13	12811681	12811853	Merged-chr13-12811767-1	Prl2c3 (-11689), Prl2c2 (+193616)
chr13	12851626	12851798	Merged-chr13-12851712-1	Prl2c3 (-51634), Prl2c2 (+153671)
chr13	12889730	12889902	Merged-chr13-12889816-1	Prl2c3 (-89738), Prl2c2 (+115567)
chr13	12911685	12911857	Merged-chr13-12911771-1	Prl2c3 (-111693), Prl2c2 (+93612)
chr13	17695526	17695698	Merged-chr13-17695612-1	5033411D12Rik (-880), Mplkip (+199)
chr13	20600355	20600527	Merged-chr13-20600441-2	Aoah (-193678), Elmo1 (+509822)
chr13	20916755	20916927	Merged-chr13-20916841-2	Aoah (+122722), Olfr1370 (+156458)
chr13	23402205	23402377	Merged-chr13-23402291-1	Zfp322a (-33083), Abt1 (+21575)
chr13	28959743	28959915	Merged-chr13-28959829-2	Sox4 (-6116), Cdkal1 (+895845)
chr13	29034544	29034716	Merged-chr13-29034630-2	Sox4 (-80917), Cdkal1 (+821044)
chr13	29596819	29596991	Merged-chr13-29596905-2	Sox4 (-643192), Cdkal1 (+258769)
chr13	29917247	29917419	Merged-chr13-29917333-2	Cdkal1 (-61659), E2f3 (+68335)
chr13	31292673	31292845	Merged-chr13-31292759-2	Foxq1 (-265411), Gm5447 (+318555)
chr13	31293409	31293581	Merged-chr13-31293495-2	Foxq1 (-264675), Gm5447 (+319291)
chr13	34344037	34344209	Merged-chr13-34344123-1	Slc22a23 (+1059), Psmg4 (+181159)
chr13	35812149	35812321	Merged-chr13-35812235-2	Rpp40 (+94124), Cdyl (+152373)
chr13	37517480	37517652	Merged-chr13-37517566-2	Rreb1 (-308749), Ly86 (+172221)
chr13	37680978	37681150	Merged-chr13-37681064-2	Rreb1 (-145251), Ly86 (+335719)
chr13	38109183	38109355	Merged-chr13-38109269-1	Dsp (-42079), Riok1 (+72280)
chr13	38204982	38205154	Merged-chr13-38205068-1	Snrnp48 (+129)
chr13	40669912	40670084	Merged-chr13-40669998-2	Ofcc1 (-381987), Gm9979 (-34007)
chr13	41334005	41334177	Merged-chr13-41334091-2	Smim13 (+84231), Nedd9 (+153229)
chr13	43531206	43531378	Merged-chr13-43531292-2	Ranbp9 (-50319), Mcur1 (+28899)
chr13	44751800	44751972	Merged-chr13-44751886-1	Jarid2 (+20615), Dtnbp1 (+250210)
chr13	46418254	46418426	Merged-chr13-46418340-2	Rbm24 (+40)
chr13	46429184	46429356	Merged-chr13-46429270-2	Cap2 (-72578), Rbm24 (+10970)
chr13	46534195	46534367	Merged-chr13-46534281-2	C78339 (-135241), Cap2 (+32433)
chr13	46535103	46535275	Merged-chr13-46535189-2	C78339 (-134333), Cap2 (+33341)
chr13	46616782	46616954	Merged-chr13-46616868-2	C78339 (-52654), Cap2 (+115020)
chr13	46619657	46619829	Merged-chr13-46619743-2	C78339 (-49779), Cap2 (+117895)
chr13	47821417	47821589	Merged-chr13-47821503-2	4931429P17Rik (+197105), Rnf144b (+698783)
chr13	48159173	48159345	Merged-chr13-48159259-2	4931429P17Rik (-140651), Id4 (-102168)
chr13	48944661	48944833	Merged-chr13-48944747-2	Phf2 (-73862), Fam120a (+23270)
chr13	49020344	49020516	Merged-chr13-49020430-2	Fam120a (-52413), Wnk2 (+127584)
chr13	49112710	49112882	Merged-chr13-49112796-2	Fam120a (-144779), Wnk2 (+35218)
chr13	49188133	49188305	Merged-chr13-49188219-1	Ninj1 (+734)
chr13	49382924	49383096	Merged-chr13-49383010-2	Ippk (-38301), Bicd2 (+41461)
chr13	50907095	50907267	Merged-chr13-50907181-2	Spin1 (-193699), Gm8765 (+208852)
chr13	51510682	51510854	Merged-chr13-51510768-1	Shc3 (+56316), S1pr3 (+102150)
chr13	51631467	51631639	Merged-chr13-51631553-2	Shc3 (-64469), Cks2 (-13679)
chr13	51688969	51689141	Merged-chr13-51689055-1	Gm15440 (+11986), Secisbp2 (+37358)
chr13	51918977	51919149	Merged-chr13-51919063-2	Gadd45g (+72385), Diras2 (+611773)
chr13	51920631	51920803	Merged-chr13-51920717-2	Gadd45g (+74039), Diras2 (+610119)
chr13	51980410	51980582	Merged-chr13-51980496-2	Gadd45g (+133818), Diras2 (+550340)
chr13	53167223	53167395	Merged-chr13-53167309-2	Nfil3 (-186236), Ror2 (+118815)
chr13	54216068	54216240	Merged-chr13-54216154-2	Cplx2 (-155195), Hrh2 (+24025)
chr13	54883806	54883978	Merged-chr13-54883892-2	Unc5a (-65519), Tspan17 (+94515)
chr13	55419266	55419438	Merged-chr13-55419352-1	Pfn3 (-4186)
chr13	55484666	55484838	Merged-chr13-55484752-2	Dbn1 (+3359), Prr7 (+20485)
chr13	55936658	55936830	Merged-chr13-55936744-2	Pitx1 (-105319), H2afy (+198887)
chr13	56582209	56582381	Merged-chr13-56582295-2	Lect2 (-33757), Tgfbi (-27308)
chr13	57046236	57046408	Merged-chr13-57046322-2	Trpc7 (-150585), Spock1 (+861265)
chr13	57947583	57947755	Merged-chr13-57947669-2	Spock1 (-40082), Klhl3 (+154759)
chr13	57949618	57949790	Merged-chr13-57949704-2	Spock1 (-42117), Klhl3 (+152724)
chr13	59096749	59096921	Merged-chr13-59096835-2	Ntrk2 (+288935), Agtpbp1 (+460454)
chr13	62908210	62908382	Merged-chr13-62908296-2	2010111I01Rik (-106638), Fbp1 (-20014)
chr13	64432444	64432616	Merged-chr13-64432530-2	Cdk20 (-23)
chr13	66431488	66431660	Merged-chr13-66431574-1	Vmn2r-ps104 (-76189), 2410141K09Rik (+9504)
chr13	66715878	66716050	Merged-chr13-66715964-1	Zfp640 (-42634), Gm17404 (+135549)
chr13	69908818	69908990	Merged-chr13-69908904-1	Med10 (+99022), BC018507 (+728730)
chr13	70379319	70379491	Merged-chr13-70379405-2	BC018507 (+258229), Med10 (+569523)
chr13	73322397	73322569	Merged-chr13-73322483-2	Gm10263 (+4639), Ndufs6 (+6059)
chr13	74929150	74929322	Merged-chr13-74929236-1	Pcsk1 (-160590), Cast (-121315)
chr13	79867680	79867852	Merged-chr13-79867766-1	NONE
chr13	82063988	82064160	Merged-chr13-82064074-2	Cetn3 (+280782)
chr13	91371228	91371400	Merged-chr13-91371314-2	Atg10 (-147327), Ssbp2 (-89736)
chr13	91461068	91461240	Merged-chr13-91461154-2	Ssbp2 (+104)
chr13	94062468	94062640	Merged-chr13-94062554-2	Lhfpl2 (+4758), Scamp1 (+223275)
chr13	95018080	95018252	Merged-chr13-95018166-2	Wdr41 (+41818), Pde8b (+204900)
chr13	96660166	96660338	Merged-chr13-96660252-2	Hmgcr (+10684), Col4a3bp (+117517)
chr13	97491329	97491501	Merged-chr13-97491415-2	Enc1 (+250310), Gm10260 (+269173)
chr13	97565967	97566139	Merged-chr13-97566053-2	Gm10260 (+194535), Enc1 (+324948)
chr13	98890216	98890388	Merged-chr13-98890302-2	Fcho2 (-74853), Tnpo1 (+36082)
chr13	99609433	99609605	Merged-chr13-99609519-1	Map1b (-92917), Cartpt (+291164)
chr13	100616686	100616858	Merged-chr13-100616772-2	Marveld2 (+199)
chr13	100990751	100990923	Merged-chr13-100990837-2	Slc30a5 (-157410), Pik3r1 (+777380)
chr13	104576445	104576617	Merged-chr13-104576531-2	Cwc27 (+240422), Adamts6 (+288658)
chr13	107493690	107493862	Merged-chr13-107493776-1	Zswim6 (+396288), 3830408C21Rik (+461813)
chr13	107668638	107668810	Merged-chr13-107668724-2	Zswim6 (+221340), 3830408C21Rik (+636761)
chr13	107678914	107679086	Merged-chr13-107679000-2	Zswim6 (+211064), 3830408C21Rik (+647037)
chr13	107851026	107851198	Merged-chr13-107851112-2	Zswim6 (+38952), 3830408C21Rik (+819149)
chr13	110602995	110603167	Merged-chr13-110603081-1	Actbl2 (-651932), Plk2 (+208037)
chr13	111519730	111519902	Merged-chr13-111519816-2	Gm10198 (-72969), Gpbp1 (-29705)
chr13	112001256	112001428	Merged-chr13-112001342-2	Ankrd55 (-287109), Map3k1 (-192349)
chr13	112375830	112376002	Merged-chr13-112375916-2	Il6st (-99092), Ankrd55 (+87465)
chr13	112578132	112578304	Merged-chr13-112578218-1	Il31ra (+2444), Il6st (+103210)
chr13	112868482	112868654	Merged-chr13-112868568-1	Skiv2l2 (+58812), Ppap2a (+67674)
chr13	113652971	113653143	Merged-chr13-113653057-2	Snx18 (-34493), Hspb3 (+10619)
chr13	115089285	115089457	Merged-chr13-115089371-2	Pelo (+817)
chr13	116285283	116285455	Merged-chr13-116285369-2	Isl1 (+24319)
chr14	5904285	5904457	Merged-chr14-5904371-1	Gm3424 (-74042), Gm3453 (+74766)
chr14	6932717	6932889	Merged-chr14-6932803-1	Gm3642 (-92492), Gm3685 (+112104)
chr14	7773993	7774165	Merged-chr14-7774079-2	Gm10338 (-178487), Flnb (-43878)
chr14	13770831	13771003	Merged-chr14-13770917-2	Sntn (+100041), Gm281 (+143561)
chr14	17586040	17586212	Merged-chr14-17586126-2	Thrb (-395518)
chr14	19701673	19701845	Merged-chr14-19701759-2	Gm5458 (-99178), Nid2 (-49498)
chr14	20664570	20664742	Merged-chr14-20664656-2	Myoz1 (-8116), Synpo2l (+3650)
chr14	20682689	20682861	Merged-chr14-20682775-1	Fut11 (-12193), Sec24c (+8454)
chr14	21312030	21312202	Merged-chr14-21312116-2	Kat6b (-188776), Adk (+259542)
chr14	24155926	24156098	Merged-chr14-24156012-2	Kcnma1 (-352708), Dlg5 (+89908)
chr14	24253965	24254137	Merged-chr14-24254051-2	E330034G19Rik (-39313), Dlg5 (-8131)
chr14	24270533	24270705	Merged-chr14-24270619-2	Dlg5 (-24699), E330034G19Rik (-22745)
chr14	24601338	24601510	Merged-chr14-24601424-2	Zmiz1 (-857800), Rps24 (+110743)
chr14	25318159	25318331	Merged-chr14-25318245-2	Zmiz1 (-140979), Rps24 (+827564)
chr14	25747708	25747880	Merged-chr14-25747794-1	Zcchc24 (+21062), Ppif (+53624)
chr14	27105875	27106047	Merged-chr14-27105961-1	Arhgef3 (-132078), Il17rd (+66960)
chr14	29758187	29758359	Merged-chr14-29758273-2	Selk (-210035), Cacna2d3 (-36409)
chr14	31571511	31571683	Merged-chr14-31571597-2	Colq (+5786), Eaf1 (+76518)
chr14	32634474	32634646	Merged-chr14-32634560-2	Prrxl1 (+34633), 3425401B19Rik (+50712)
chr14	33535411	33535583	Merged-chr14-33535497-2	Mapk8 (-88339), Ptpn20 (-53773)
chr14	34209185	34209357	Merged-chr14-34209271-2	Syt15 (-10776), Gprin2 (-7638)
chr14	34303315	34303487	Merged-chr14-34303401-2	Fam35a (+7102), Syt15 (+83354)
chr14	37032643	37032815	Merged-chr14-37032729-2	Ccser2 (-63952), Rgr (+16235)
chr14	37820028	37820200	Merged-chr14-37820114-1	Ghitm (-684975)
chr14	38510158	38510330	Merged-chr14-38510244-2	Nrg3 (+962844)
chr14	44602676	44602848	Merged-chr14-44602762-2	Gm8247 (+19609), Gm8267 (+122225)
chr14	45507167	45507339	Merged-chr14-45507253-1	Gnpnat1 (-118451), Fermt2 (+22865)
chr14	46947786	46947958	Merged-chr14-46947872-2	Samd4 (+65018), Gch1 (+241541)
chr14	47341706	47341878	Merged-chr14-47341792-2	Lgals3 (-32021), Mapk1ip1l (+33227)
chr14	47356713	47356885	Merged-chr14-47356799-2	Lgals3 (-17014), Mapk1ip1l (+48234)
chr14	47629430	47629602	Merged-chr14-47629516-1	Atg14 (-61082), Ktn1 (-34240)
chr14	48475671	48475843	Merged-chr14-48475757-2	Tmem260 (+29375), Otx2 (+189489)
chr14	52257991	52258163	Merged-chr14-52258077-1	Tox4 (-21069), Chd8 (-20505)
chr14	53577239	53577411	Merged-chr14-53577325-2	Trav9n-1 (+475632), Dad1 (+676589)
chr14	54383657	54383829	Merged-chr14-54383743-1	Oxa1l (+22902), Slc7a7 (+25729)
chr14	55575563	55575735	Merged-chr14-55575649-1	Psme1 (-2711), Fitm1 (+32)
chr14	61648745	61648917	Merged-chr14-61648831-1	Kcnrg (+41349), Dleu7 (+644148)
chr14	62425282	62425454	Merged-chr14-62425368-2	Gucy1b2 (+30921), Rnaseh2b (+93300)
chr14	62760518	62760690	Merged-chr14-62760604-1	Ints6 (+508)
chr14	62852883	62853055	Merged-chr14-62852969-2	Wdfy2 (+15279), Defb48 (+131541)
chr14	63179648	63179820	Merged-chr14-63179734-2	Fdft1 (-1941)
chr14	63182788	63182960	Merged-chr14-63182874-2	Fdft1 (-5081), Neil2 (+10667)
chr14	63500211	63500383	Merged-chr14-63500297-2	Tdh (+8795), Fam167a (+63903)
chr14	64585438	64585610	Merged-chr14-64585524-1	Msra (-129621), Kif13b (-67007)
chr14	64591562	64591734	Merged-chr14-64591648-1	Msra (-135745), Kif13b (-60883)
chr14	64949856	64950028	Merged-chr14-64949942-1	Ints9 (-103), Hmbox1 (-95)
chr14	65052612	65052784	Merged-chr14-65052698-2	Extl3 (+45408), Ints9 (+102653)
chr14	67019936	67020108	Merged-chr14-67020022-2	Bnip3l (-11145), Ppp2r2a (+52449)
chr14	68934937	68935109	Merged-chr14-68935023-2	Adam28 (-279181), Stc1 (-94266)
chr14	69965617	69965789	Merged-chr14-69965703-1	Egr3 (-111742), Pebp4 (+125283)
chr14	70659012	70659184	Merged-chr14-70659098-1	Npm2 (-6014), Xpo7 (+107530)
chr14	73325157	73325329	Merged-chr14-73325243-2	Rb1 (+579)
chr14	74882932	74883104	Merged-chr14-74883018-2	Lrch1 (+64859), Esd (+150721)
chr14	75855323	75855495	Merged-chr14-75855409-2	Kctd4 (-99594), Tpt1 (+10316)
chr14	76631737	76631909	Merged-chr14-76631823-1	Serp2 (-75136), Lacc1 (+404818)
chr14	78288929	78289101	Merged-chr14-78289015-2	Fam216b (-200008), Tnfsf11 (+19028)
chr14	79769769	79769941	Merged-chr14-79769855-1	Lect1 (-107685), Pcdh8 (+1457)
chr14	87347339	87347511	Merged-chr14-87347425-2	Diap3 (-206311), Tdrd3 (-69214)
chr14	89557436	89557608	Merged-chr14-89557522-2	Gm10110 (+340944)
chr14	102072314	102072486	Merged-chr14-102072400-2	Irg1 (-974577), Lmo7 (+342443)
chr14	104336913	104337085	Merged-chr14-104336999-2	Ednrb (-493303), Pou4f1 (+130992)
chr14	104467976	104468148	Merged-chr14-104468062-2	Pou4f1 (-71)
chr14	105427503	105427675	Merged-chr14-105427589-1	4930449E01Rik (-71199), Ndfip2 (+169016)
chr14	114959852	114960024	Merged-chr14-114959938-2	Gpc5 (-132688)
chr14	118640859	118641031	Merged-chr14-118640945-2	Abcc4 (+65274), Gm9376 (+373787)
chr14	118695968	118696140	Merged-chr14-118696054-2	Abcc4 (+10165), Gm9376 (+428896)
chr14	118872230	118872402	Merged-chr14-118872316-2	Cldn10 (+17584), Dzip1 (+50851)
chr14	120263003	120263175	Merged-chr14-120263089-2	Oxgr1 (-220654), Mbnl2 (-12580)
chr14	120355567	120355739	Merged-chr14-120355653-1	Rap2a (-122808), Mbnl2 (+79984)
chr14	120882533	120882705	Merged-chr14-120882619-2	Ipo5 (-28575), Rap2a (+404158)
chr14	121542999	121543171	Merged-chr14-121543085-2	Slc15a1 (-37831), Dock9 (+155332)
chr14	122267650	122267822	Merged-chr14-122267736-2	Clybl (+86042), Zic5 (+197941)
chr14	122416279	122416451	Merged-chr14-122416365-1	Zic5 (+49312), Clybl (+234671)
chr14	122962454	122962626	Merged-chr14-122962540-2	Ggact (-49378), Tmtc4 (+20743)
chr15	7167962	7168134	Merged-chr15-7168048-2	Lifr (+13695), Egflam (+230256)
chr15	9213174	9213346	Merged-chr15-9213260-2	Ugt3a1 (-66569), Lmbrd2 (+72639)
chr15	12136471	12136643	Merged-chr15-12136557-2	Mtmr12 (-68471), Zfr (+18726)
chr15	12224355	12224527	Merged-chr15-12224441-2	Golph3 (-97055), Mtmr12 (+19413)
chr15	25648361	25648533	Merged-chr15-25648447-2	Fam134b (-194817), Myo10 (+25922)
chr15	25762370	25762542	Merged-chr15-25762456-2	Fam134b (-80808), Myo10 (+139931)
chr15	27937882	27938054	Merged-chr15-27937968-1	Fam105a (-256426), Trio (+87880)
chr15	28071194	28071366	Merged-chr15-28071280-2	Dnahc5 (-132472), Trio (-45432)
chr15	30798707	30798879	Merged-chr15-30798793-2	Dap (-425592), Ctnnd2 (+626200)
chr15	34829416	34829588	Merged-chr15-34829502-1	Nipal2 (-150796), Kcns2 (-7879)
chr15	36507873	36508045	Merged-chr15-36507959-1	Ankrd46 (-11168), Snx31 (+47614)
chr15	36792798	36792970	Merged-chr15-36792884-2	Pabpc1 (-183911), Ywhaz (+1654)
chr15	37514687	37514859	Merged-chr15-37514773-2	4930447A16Rik (+89219), Ncald (+277660)
chr15	37780355	37780527	Merged-chr15-37780441-2	Ncald (+11992), 4930447A16Rik (+354887)
chr15	38251100	38251272	Merged-chr15-38251186-2	Odf1 (+31983), Klf10 (+49521)
chr15	39198193	39198365	Merged-chr15-39198279-2	Rims2 (-84)
chr15	41804537	41804709	Merged-chr15-41804623-2	Abra (+65097), Oxr1 (+357141)
chr15	44716079	44716251	Merged-chr15-44716165-2	Sybu (+71898), Ebag9 (+96524)
chr15	45590036	45590208	Merged-chr15-45590122-1	Kcnv1 (-475188)
chr15	52967898	52968070	Merged-chr15-52967984-2	Med30 (+255539), Ext1 (+378175)
chr15	54966091	54966263	Merged-chr15-54966177-1	Enpp2 (-46031), Taf2 (+105975)
chr15	55976043	55976215	Merged-chr15-55976129-1	Sntb1 (-69180), Has2 (+718410)
chr15	58017943	58018115	Merged-chr15-58018029-2	9130401M01Rik (+16265), Fam83a (+32610)
chr15	58223311	58223483	Merged-chr15-58223397-2	Fbxo32 (-8505), Klhl38 (+100772)
chr15	58986572	58986744	Merged-chr15-58986658-2	Ndufb9 (+52848), Mtss1 (+95368)
chr15	63998191	63998363	Merged-chr15-63998277-2	Gsdmc4 (-95341), Fam49b (+62171)
chr15	67046537	67046709	Merged-chr15-67046623-2	Ndrg1 (-76983), St3gal1 (+67369)
chr15	72689890	72690062	Merged-chr15-72689976-1	Gm3150 (-223381), Kcnk9 (-143697)
chr15	73447005	73447177	Merged-chr15-73447091-1	Dennd3 (-65469), Ptk2 (-23900)
chr15	73570330	73570502	Merged-chr15-73570416-1	Slc45a4 (+54328), Dennd3 (+57856)
chr15	73687724	73687896	Merged-chr15-73687810-2	Slc45a4 (-63066), Gpr20 (+19695)
chr15	73707489	73707661	Merged-chr15-73707575-1	Gpr20 (-70)
chr15	75658649	75658821	Merged-chr15-75658735-2	Top1mt (+20065), Zfp41 (+42050)
chr15	75748401	75748573	Merged-chr15-75748487-2	Mafa (-565)
chr15	75802859	75803031	Merged-chr15-75802945-1	Mafa (-55023), Zc3h3 (+38970)
chr15	76012885	76013057	Merged-chr15-76012971-2	Fam83h (-3473)
chr15	76350349	76350521	Merged-chr15-76350435-1	Maf1 (-859), Sharpin (+676)
chr15	76644101	76644273	Merged-chr15-76644187-1	Tonsl (-4229)
chr15	76976744	76976916	Merged-chr15-76976830-2	1110038F14Rik (+28291), Mb (+45957)
chr15	77163444	77163616	Merged-chr15-77163530-1	Apol6 (+118455), Rbfox2 (+143523)
chr15	77863196	77863368	Merged-chr15-77863282-2	Myh9 (-21107), Txn2 (+65686)
chr15	78486682	78486854	Merged-chr15-78486768-2	Tmprss6 (-18134), Il2rb (+8298)
chr15	78928121	78928293	Merged-chr15-78928207-2	Nol12 (-6726), Lgals1 (+1482)
chr15	79126425	79126597	Merged-chr15-79126511-2	1700088E04Rik (+14740), Micall1 (+17539)
chr15	79349393	79349565	Merged-chr15-79349479-2	Maff (+1938), Tmem184b (+53824)
chr15	79758892	79759064	Merged-chr15-79758978-2	Sun2 (-16442), Dnalc4 (+15489)
chr15	80203507	80203679	Merged-chr15-80203593-2	Smcr7l (-30487), Mgat3 (+29872)
chr15	80366926	80367098	Merged-chr15-80367012-2	Cacna1i (+79774), Enthd1 (+193458)
chr15	80928924	80929096	Merged-chr15-80929010-2	Adsl (-19480), Tnrc6b (+217691)
chr15	82147860	82148032	Merged-chr15-82147946-2	Srebf2 (+680)
chr15	82937815	82937987	Merged-chr15-82937901-1	Tcf20 (-25767), Nfam1 (+85237)
chr15	83535465	83535637	Merged-chr15-83535551-1	Bik (+8689), Mcat (+20160)
chr15	83636869	83637041	Merged-chr15-83636955-2	Ttll12 (-41798), Scube1 (+88066)
chr15	83673138	83673310	Merged-chr15-83673224-2	Ttll12 (-78067), Scube1 (+51797)
chr15	83775986	83776158	Merged-chr15-83776072-2	Scube1 (-51051), Mpped1 (-8757)
chr15	84328929	84329101	Merged-chr15-84329015-2	Parvg (+2896), 1810041L15Rik (+118082)
chr15	84411083	84411255	Merged-chr15-84411169-2	1810041L15Rik (+35928), Parvg (+85050)
chr15	84645522	84645694	Merged-chr15-84645608-1	Ldoc1l (-87785), Prr5 (-35394)
chr15	84657500	84657672	Merged-chr15-84657586-2	Ldoc1l (-99763), Prr5 (-23416)
chr15	84791002	84791174	Merged-chr15-84791088-2	Phf21b (+64961), Arhgap8 (+71036)
chr15	85235572	85235744	Merged-chr15-85235658-2	Atxn10 (-100723), Fbln1 (+29709)
chr15	86963120	86963292	Merged-chr15-86963206-2	Fam19a5 (-662024), Tbc1d22a (+748747)
chr15	88189500	88189672	Merged-chr15-88189586-2	Zdhhc25 (-410716), Fam19a5 (+564356)
chr15	88949634	88949806	Merged-chr15-88949720-1	Ttll8 (+4690), Pim3 (+87534)
chr15	91078153	91078325	Merged-chr15-91078239-1	Kif21a (-28291), Abcd2 (+113568)
chr15	95025682	95025854	Merged-chr15-95025768-2	Tmem117 (+396583), Nell2 (+502938)
chr15	95797399	95797571	Merged-chr15-95797485-2	Arid2 (-490088), A130051J06Rik (-5843)
chr15	96297212	96297384	Merged-chr15-96297298-2	Arid2 (+9725), Scaf11 (+163545)
chr15	96333526	96333698	Merged-chr15-96333612-2	Arid2 (+46039), Scaf11 (+127231)
chr15	97074666	97074838	Merged-chr15-97074752-2	Pced1b (-172355), Slc38a4 (-18796)
chr15	98114598	98114770	Merged-chr15-98114684-2	Pfkm (+6213), Asb8 (+50941)
chr15	98516077	98516249	Merged-chr15-98516163-1	Kansl2 (+18058), Olfr279 (+18689)
chr15	98743946	98744118	Merged-chr15-98744032-2	Fkbp11 (-15834), Arf3 (+19179)
chr15	98831878	98832050	Merged-chr15-98831964-1	Prkag1 (-456)
chr15	98851606	98851778	Merged-chr15-98851692-2	Prkag1 (-20184), Mll2 (+19491)
chr15	98863017	98863189	Merged-chr15-98863103-2	Prkag1 (-31595), Mll2 (+8080)
chr15	99440552	99440724	Merged-chr15-99440638-1	Nckap5l (+17110), Tmbim6 (+47756)
chr15	99890907	99891079	Merged-chr15-99890993-2	Lima1 (-15565), Fam186a (+40803)
chr15	99891427	99891599	Merged-chr15-99891513-1	Lima1 (-16085), Fam186a (+40283)
chr15	100314537	100314709	Merged-chr15-100314623-2	Mettl7a3 (-20306), Mettl7a1 (+9806)
chr15	100351793	100351965	Merged-chr15-100351879-1	Mettl7a2 (-1321), AB099516 (-1270)
chr15	100414072	100414244	Merged-chr15-100414158-2	Gm5475 (-7989), Higd1c (+49613)
chr15	100630279	100630451	Merged-chr15-100630365-2	Smagp (+6490), Dazap2 (+14737)
chr15	100664828	100665000	Merged-chr15-100664914-2	Smagp (-28059), Bin2 (+4639)
chr15	100965084	100965256	Merged-chr15-100965170-2	Fignl2 (+89229), Scn8a (+94487)
chr15	101112832	101113004	Merged-chr15-101112918-2	Ankrd33 (-2837)
chr15	101116970	101117142	Merged-chr15-101117056-2	Acvrl1 (-11466), Ankrd33 (+1301)
chr15	101228151	101228323	Merged-chr15-101228237-1	Nr4a1 (-38609), Grasp (+4030)
chr15	101229287	101229459	Merged-chr15-101229373-2	Nr4a1 (-37473), Grasp (+5166)
chr15	101397061	101397233	Merged-chr15-101397147-2	Krt80 (-27022), Krt7 (-15255)
chr15	101494339	101494511	Merged-chr15-101494425-2	5430421N21Rik (-2913)
chr15	101553340	101553512	Merged-chr15-101553426-2	Krt82 (-2767)
chr15	103155822	103155994	Merged-chr15-103155908-2	Smug1 (+2094), Hoxc4 (+121513)
chr15	103170029	103170201	Merged-chr15-103170115-2	Smug1 (-12113), Cbx5 (+69701)
chr15	103215279	103215451	Merged-chr15-103215365-2	Smug1 (-57363), Cbx5 (+24451)
chr15	103411845	103412017	Merged-chr15-103411931-2	Itga5 (-45168), Gtsf1 (+18539)
chr16	3843044	3843216	Merged-chr16-3843130-2	Zfp174 (-4138)
chr16	4602279	4602451	Merged-chr16-4602365-1	Glis2 (+7652), Pam16 (+22623)
chr16	7695180	7695352	Merged-chr16-7695266-1	Rbfox1 (+625431), Cldn26 (+729870)
chr16	8431436	8431608	Merged-chr16-8431522-2	Mettl22 (-39266), Cldn26 (-6386)
chr16	8470599	8470771	Merged-chr16-8470685-2	Mettl22 (-103)
chr16	8481733	8481905	Merged-chr16-8481819-2	Abat (-31610), Mettl22 (+11031)
chr16	9030101	9030273	Merged-chr16-9030187-2	1810013L24Rik (+200087), Grin2a (+964734)
chr16	9127931	9128103	Merged-chr16-9128017-1	1810013L24Rik (+297917), Grin2a (+866904)
chr16	9132846	9133018	Merged-chr16-9132932-2	1810013L24Rik (+302832), Grin2a (+861989)
chr16	9280943	9281115	Merged-chr16-9281029-2	1810013L24Rik (+450929), Grin2a (+713892)
chr16	10289121	10289293	Merged-chr16-10289207-2	Emp2 (+24761), Atf7ip2 (+96495)
chr16	10651981	10652153	Merged-chr16-10652067-2	Clec16a (+106728), Socs1 (+133469)
chr16	10884788	10884960	Merged-chr16-10884874-2	Rmi2 (+49815), Litaf (+108247)
chr16	10887539	10887711	Merged-chr16-10887625-2	Rmi2 (+52566), Litaf (+105496)
chr16	11568231	11568403	Merged-chr16-11568317-2	Gm9961 (-333046), Snx29 (+162669)
chr16	13428930	13429102	Merged-chr16-13429016-2	Mkl2 (+172535), Parn (+239154)
chr16	14004316	14004488	Merged-chr16-14004402-2	Ifitm7 (-17547), Marf1 (+154872)
chr16	14859561	14859733	Merged-chr16-14859647-2	Efcab1 (-46990), Snai2 (+153795)
chr16	16912020	16912192	Merged-chr16-16912106-2	Mapk1 (-71276), Ppm1f (+15637)
chr16	17210578	17210750	Merged-chr16-17210664-2	Hic2 (-22908), Rimbp3 (+2529)
chr16	17530823	17530995	Merged-chr16-17530909-2	Thap7 (+227)
chr16	18724803	18724975	Merged-chr16-18724889-2	Sept5 (-94951), Cldn5 (-51958)
chr16	18744657	18744829	Merged-chr16-18744743-2	Sept5 (-114805), Cldn5 (-32104)
chr16	18773994	18774166	Merged-chr16-18774080-1	Cldn5 (-2767)
chr16	20516662	20516834	Merged-chr16-20516748-2	Dvl3 (-234)
chr16	20522553	20522725	Merged-chr16-20522639-2	Ap2m1 (-12841), Dvl3 (+5657)
chr16	20523097	20523269	Merged-chr16-20523183-1	Ap2m1 (-12297), Dvl3 (+6201)
chr16	22120567	22120739	Merged-chr16-22120653-2	Igf2bp2 (+42646), Senp2 (+111169)
chr16	22216342	22216514	Merged-chr16-22216428-2	Igf2bp2 (-53129), Tra2b (+49577)
chr16	23107713	23107885	Merged-chr16-23107799-1	Eif4a2 (+355)
chr16	26649614	26649786	Merged-chr16-26649700-2	Il1rap (+67996), Gmnc (+340274)
chr16	29762098	29762270	Merged-chr16-29762184-2	Hes1 (-303156), Opa1 (+182804)
chr16	29877841	29878013	Merged-chr16-29877927-2	Hes1 (-187413), Opa1 (+298547)
chr16	30050948	30051120	Merged-chr16-30051034-2	Hes1 (-14306), Opa1 (+471654)
chr16	30400704	30400876	Merged-chr16-30400790-2	Atp13a3 (-12260), Tmem44 (+149788)
chr16	30527992	30528164	Merged-chr16-30528078-2	Atp13a3 (-139548), Tmem44 (+22500)
chr16	30726143	30726315	Merged-chr16-30726229-2	Fam43a (+126506), Xxylt1 (+355203)
chr16	31354944	31355116	Merged-chr16-31355030-1	Bdh1 (-73718), Apod (-40222)
chr16	31489245	31489417	Merged-chr16-31489331-2	Dlg1 (-174708), Bdh1 (+60583)
chr16	31510175	31510347	Merged-chr16-31510261-2	Dlg1 (-153778), Bdh1 (+81513)
chr16	32117850	32118022	Merged-chr16-32117936-2	Cep19 (+18136), Lrrc33 (+47540)
chr16	32516447	32516619	Merged-chr16-32516533-2	Tfrc (-92387), Zdhhc19 (+20268)
chr16	33251664	33251836	Merged-chr16-33251750-2	Snx4 (+294)
chr16	35490929	35491101	Merged-chr16-35491015-2	Pdia5 (-142)
chr16	35551330	35551502	Merged-chr16-35551416-1	Sema5b (+9845), Dirc2 (+217940)
chr16	35680520	35680692	Merged-chr16-35680606-2	Dirc2 (+88750), Sema5b (+139035)
chr16	35981652	35981824	Merged-chr16-35981738-1	Kpna1 (-1577)
chr16	38248764	38248936	Merged-chr16-38248850-2	Nr1i2 (+45974), Gsk3b (+159849)
chr16	44238977	44239149	Merged-chr16-44239063-2	Gm608 (+65817), Sidt1 (+94133)
chr16	44675538	44675710	Merged-chr16-44675624-1	Boc (-116754), BC027231 (-48677)
chr16	48630626	48630798	Merged-chr16-48630712-2	Trat1 (+141244), Morc1 (+199475)
chr16	50554787	50554959	Merged-chr16-50554873-2	Bbx (-122483), Ccdc54 (+36281)
chr16	50736239	50736411	Merged-chr16-50736325-2	5330426P16Rik (-3582)
chr16	50783789	50783961	Merged-chr16-50783875-2	5330426P16Rik (-51132)
chr16	52083433	52083605	Merged-chr16-52083519-2	Cblb (+51970), Alcam (+370555)
chr16	52083907	52084079	Merged-chr16-52083993-2	Cblb (+52444), Alcam (+370081)
chr16	57194728	57194900	Merged-chr16-57194814-2	Nit2 (-27482), Tbc1d23 (+36652)
chr16	65815189	65815361	Merged-chr16-65815275-2	Vgll3 (-358)
chr16	74368543	74368715	Merged-chr16-74368629-2	Robo2 (+42360)
chr16	76319978	76320150	Merged-chr16-76320064-2	Samsn1 (-410754), Nrip1 (+53763)
chr16	87435436	87435608	Merged-chr16-87435522-2	Ltn1 (-2916)
chr16	88701055	88701227	Merged-chr16-88701141-2	Krtap27-1 (-29487), 2310061N02Rik (+6821)
chr16	89973898	89974070	Merged-chr16-89973984-1	Tiam1 (+715)
chr16	89980193	89980365	Merged-chr16-89980279-2	Sod1 (-240463), Tiam1 (-5580)
chr16	90082139	90082311	Merged-chr16-90082225-2	Sod1 (-138517), Tiam1 (-107526)
chr16	90553297	90553469	Merged-chr16-90553383-2	1110008E08Rik (-781)
chr16	91067207	91067379	Merged-chr16-91067293-1	Paxbp1 (-22750), 4932438H23Rik (+1852)
chr16	91534510	91534682	Merged-chr16-91534596-1	Ifngr2 (-12476), Ifnar1 (+49358)
chr16	91693280	91693452	Merged-chr16-91693366-2	Donson (-4601)
chr16	93309086	93309258	Merged-chr16-93309172-2	Runx1 (-483106), Setd4 (+294643)
chr16	93961274	93961446	Merged-chr16-93961360-2	Cldn14 (+47477), Chaf1b (+77459)
chr16	94698524	94698696	Merged-chr16-94698610-2	Dyrk1a (+128600), Kcnj6 (+299086)
chr16	94699174	94699346	Merged-chr16-94699260-2	Dyrk1a (+129250), Kcnj6 (+298436)
chr16	94972543	94972715	Merged-chr16-94972629-1	Kcnj6 (+25067), Dyrk1a (+402619)
chr16	95093841	95094013	Merged-chr16-95093927-1	Kcnj15 (-163631), Kcnj6 (-96231)
chr16	95983682	95983854	Merged-chr16-95983768-2	Psmg1 (+7192), Ets2 (+281693)
chr16	96082788	96082960	Merged-chr16-96082874-1	Brwd1 (-446)
chr16	97286835	97287007	Merged-chr16-97286921-1	Dscam (-116169), Bace2 (-69807)
chr16	97815707	97815879	Merged-chr16-97815793-2	Ripk4 (-52056), Prdm15 (+35434)
chr17	3076322	3076494	Merged-chr17-3076408-1	Scaf8 (-38564)
chr17	3082704	3082876	Merged-chr17-3082790-1	Scaf8 (-32182)
chr17	3410401	3410573	Merged-chr17-3410487-2	Cldn20 (-122067), Tiam2 (+83914)
chr17	4626343	4626515	Merged-chr17-4626429-2	Nox3 (-930168), Arid1b (-368645)
chr17	5165343	5165515	Merged-chr17-5165429-2	Arid1b (+170355), Tmem242 (+274831)
chr17	6107386	6107558	Merged-chr17-6107472-2	Tulp4 (-30676), Gtf2h5 (+27686)
chr17	6457757	6457929	Merged-chr17-6457843-1	Dynlt1b (+27731), Gm2792 (+125275)
chr17	7187153	7187325	Merged-chr17-7187239-2	Tcp10a (-137428), Rps6ka2 (+17124)
chr17	7271629	7271801	Merged-chr17-7271715-2	Tcp10a (-52952), Rps6ka2 (+101600)
chr17	7297070	7297242	Merged-chr17-7297156-2	Tcp10a (-27511), Rps6ka2 (+127041)
chr17	8205265	8205437	Merged-chr17-8205351-2	Ccr6 (-37175), Fgfr1op (+39850)
chr17	8347003	8347175	Merged-chr17-8347089-2	T (-87334), Prr18 (+6683)
chr17	9606923	9607095	Merged-chr17-9607009-2	Pabpc6 (+62695), 1700010I14Rik (+618652)
chr17	9609170	9609342	Merged-chr17-9609256-2	Pabpc6 (+60448), 1700010I14Rik (+620899)
chr17	9917156	9917328	Merged-chr17-9917242-2	Pabpc6 (-247538), Qk (+402119)
chr17	10330393	10330565	Merged-chr17-10330479-2	Qk (-10250), Pacrg (+509832)
chr17	11107156	11107328	Merged-chr17-11107242-2	Park2 (-731360), Park2 (+40117)
chr17	12154468	12154640	Merged-chr17-12154554-1	Map3k4 (-77927), Agpat4 (+35270)
chr17	12205351	12205523	Merged-chr17-12205437-1	Map3k4 (-27044), Agpat4 (+86153)
chr17	13306007	13306179	Merged-chr17-13306093-1	Tcp10c (-48479), Smok2b (+77241)
chr17	13552121	13552293	Merged-chr17-13552207-1	Mllt4 (-208341), Smok4a (+30751)
chr17	14203371	14203543	Merged-chr17-14203457-1	Dact2 (+374)
chr17	14557330	14557502	Merged-chr17-14557416-2	Thbs2 (+136846), Smoc2 (+277910)
chr17	14789594	14789766	Merged-chr17-14789680-1	Thbs2 (-95418), Wdr27 (+144973)
chr17	15371964	15372136	Merged-chr17-15372050-2	Dll1 (+3926), 2210404J11Rik (+330409)
chr17	15380830	15381002	Merged-chr17-15380916-2	Dll1 (-4940)
chr17	15990330	15990502	Merged-chr17-15990416-2	BC002059 (-982494), Rgmb (-163830)
chr17	16218708	16218880	Merged-chr17-16218794-2	BC002059 (-754116), Rgmb (-392208)
chr17	16862844	16863016	Merged-chr17-16862930-1	BC002059 (-109980)
chr17	16902517	16902689	Merged-chr17-16902603-2	BC002059 (-70307)
chr17	22546903	22547075	Merged-chr17-22546989-1	Vmn2r111 (+26284), Zfp946 (+122721)
chr17	23603586	23603758	Merged-chr17-23603672-1	Zfp13 (-4185), Zscan10 (+2816)
chr17	23660732	23660904	Merged-chr17-23660818-2	Ccdc64b (+295)
chr17	23722840	23723012	Merged-chr17-23722926-2	Pkmyt1 (-3410)
chr17	24550040	24550212	Merged-chr17-24550126-2	Pkd1 (+176)
chr17	25294260	25294432	Merged-chr17-25294346-2	Prss34 (-4048)
chr17	25656230	25656402	Merged-chr17-25656316-2	Gng13 (-60855), Lmf1 (+77139)
chr17	25679649	25679821	Merged-chr17-25679735-2	Gng13 (-37436), Lmf1 (+100558)
chr17	27041326	27041498	Merged-chr17-27041412-1	Itpr3 (-15892), Bak1 (-12403)
chr17	27100304	27100476	Merged-chr17-27100390-2	Mnf1 (+33526), Itpr3 (+43086)
chr17	27101835	27102007	Merged-chr17-27101921-2	Mnf1 (+31995), Itpr3 (+44617)
chr17	27329883	27330055	Merged-chr17-27329969-1	Lemd2 (-125531), Grm4 (+173335)
chr17	27863105	27863277	Merged-chr17-27863191-2	Uhrf1bp1 (+6701), Taf11 (+46051)
chr17	28226151	28226323	Merged-chr17-28226237-1	Ppard (-6517), Def6 (+18459)
chr17	28345894	28346066	Merged-chr17-28345980-1	Tead3 (+4620), Rpl10a (+17509)
chr17	28356673	28356845	Merged-chr17-28356759-2	Tead3 (-6159), Tulp1 (+8389)
chr17	28388667	28388839	Merged-chr17-28388753-2	Tulp1 (-23605), Fkbp5 (+128771)
chr17	28556750	28556922	Merged-chr17-28556836-2	Clps (+3930), Clpsl2 (+7347)
chr17	28557873	28558045	Merged-chr17-28557959-2	Clps (+2807), Clpsl2 (+8470)
chr17	29056808	29056980	Merged-chr17-29056894-2	Cdkn1a (-36878), Srsf3 (+24221)
chr17	29118257	29118429	Merged-chr17-29118343-2	Rab44 (-16713), Cdkn1a (+24571)
chr17	29438517	29438689	Merged-chr17-29438603-2	Pim1 (-52209), Fgd2 (+77661)
chr17	29509029	29509201	Merged-chr17-29509115-2	Pim1 (+18303), Tmem217 (+40478)
chr17	29842047	29842219	Merged-chr17-29842133-2	Ccdc167 (-125124), Mdga1 (+45749)
chr17	29854973	29855145	Merged-chr17-29855059-2	Ccdc167 (-138050), Mdga1 (+32823)
chr17	30584967	30585139	Merged-chr17-30585053-2	Btbd9 (-8766), Glo1 (+27606)
chr17	30629779	30629951	Merged-chr17-30629865-1	Glp1r (-272002), Dnahc8 (+5511)
chr17	30717812	30717984	Merged-chr17-30717898-1	Glp1r (-183969), Dnahc8 (+93544)
chr17	30721686	30721858	Merged-chr17-30721772-1	Glp1r (-180095), Dnahc8 (+97418)
chr17	30796081	30796253	Merged-chr17-30796167-2	Glp1r (-105700), Dnahc8 (+171813)
chr17	31307856	31308028	Merged-chr17-31307942-2	Pde9a (-78292), Slc37a1 (+11723)
chr17	31328600	31328772	Merged-chr17-31328686-2	Pde9a (-57548), Slc37a1 (+32467)
chr17	31422123	31422295	Merged-chr17-31422209-2	Pde9a (+35975), Wdr4 (+90542)
chr17	31570396	31570568	Merged-chr17-31570482-1	Pknox1 (+5681), Cbs (+66717)
chr17	31586542	31586714	Merged-chr17-31586628-2	Pknox1 (+21827), Cbs (+50571)
chr17	31790597	31790769	Merged-chr17-31790683-2	Sik1 (+65109), Cryaa (+112750)
chr17	32162663	32162835	Merged-chr17-32162749-2	Notch3 (+4131), Rrp1b (+126649)
chr17	32164342	32164514	Merged-chr17-32164428-1	Notch3 (+2452), Rrp1b (+128328)
chr17	32211468	32211640	Merged-chr17-32211554-2	Ephx3 (-22091), Brd4 (+72543)
chr17	34388012	34388184	Merged-chr17-34388098-2	BC051142 (-10723), Btnl1 (+10966)
chr17	35059697	35059869	Merged-chr17-35059783-2	Ddah2 (+748)
chr17	35276543	35276715	Merged-chr17-35276629-2	H2-Q1 (-43929), H2-D1 (+13899)
chr17	35440332	35440504	Merged-chr17-35440418-2	H2-Q10 (-29671), H2-Q7 (+1263)
chr17	35697801	35697973	Merged-chr17-35697887-2	Gtf2h4 (-24148), Ddr1 (+6712)
chr17	35879827	35879999	Merged-chr17-35879913-2	Dhx16 (+94)
chr17	36111544	36111716	Merged-chr17-36111630-1	H2-Bl (-27381), Gm7030 (+17795)
chr17	36114205	36114377	Merged-chr17-36114291-2	H2-Bl (-30042), Gm7030 (+15134)
chr17	36953378	36953550	Merged-chr17-36953464-2	Ppp1r11 (-1751)
chr17	44914364	44914536	Merged-chr17-44914450-2	Runx2 (-99653), Cdc5l (+519257)
chr17	45602101	45602273	Merged-chr17-45602187-2	Gm7325 (-272)
chr17	45616187	45616359	Merged-chr17-45616273-2	Gm7325 (-14358), Capn11 (+43052)
chr17	46093269	46093441	Merged-chr17-46093355-2	Vegfa (-60986), Mrps18a (-17631)
chr17	46680703	46680875	Merged-chr17-46680789-2	Mea1 (-348), Klhdc3 (+141)
chr17	47291544	47291716	Merged-chr17-47291630-1	Mrps10 (-77261), Trerf1 (+150688)
chr17	47418637	47418809	Merged-chr17-47418723-2	Guca1a (-18139), AI661453 (-18082)
chr17	47511332	47511504	Merged-chr17-47511418-1	Ccnd3 (+6367), Bysl (+100074)
chr17	47521753	47521925	Merged-chr17-47521839-2	Ccnd3 (+16788), Bysl (+89653)
chr17	47542176	47542348	Merged-chr17-47542262-1	Ccnd3 (+37211), Bysl (+69230)
chr17	47736968	47737140	Merged-chr17-47737054-2	Tfeb (-48666), Pgc (+10212)
chr17	47739845	47740017	Merged-chr17-47739931-2	Tfeb (-45789), Pgc (+13089)
chr17	47757282	47757454	Merged-chr17-47757368-2	Tfeb (-28352), Pgc (+30526)
chr17	48002011	48002183	Merged-chr17-48002097-2	Foxp4 (-77662), 1700122O11Rik (+36196)
chr17	49717705	49717877	Merged-chr17-49717791-2	Kif6 (+102619), Rftn1 (+472883)
chr17	49890001	49890173	Merged-chr17-49890087-1	Kif6 (+274915), Rftn1 (+300587)
chr17	50116542	50116714	Merged-chr17-50116628-2	Rftn1 (+74046), Kif6 (+501456)
chr17	51803717	51803889	Merged-chr17-51803803-1	Tbc1d5 (-624454), Satb1 (+28869)
chr17	51839516	51839688	Merged-chr17-51839602-1	Kcnh8 (-763161), Satb1 (-6930)
chr17	52601351	52601523	Merged-chr17-52601437-2	Kcnh8 (-1326)
chr17	56357575	56357747	Merged-chr17-56357661-2	Kdm4b (+31587), Ptprs (+118822)
chr17	57070827	57070999	Merged-chr17-57070913-1	Dennd1c (+7597), Crb3 (+8682)
chr17	58041390	58041562	Merged-chr17-58041476-2	Cntnap5c (+271906), 2610034M16Rik (+949899)
chr17	64548621	64548793	Merged-chr17-64548707-2	Pja2 (-216791), AU016765 (+6796)
chr17	64559241	64559413	Merged-chr17-64559327-2	AU016765 (-3824)
chr17	64874986	64875158	Merged-chr17-64875072-2	4930583I09Rik (-39001), Tmem232 (+665704)
chr17	65962019	65962191	Merged-chr17-65962105-2	Twsg1 (-10918), Ankrd12 (+114941)
chr17	66111466	66111638	Merged-chr17-66111552-2	Wash (+6)
chr17	66335730	66335902	Merged-chr17-66335816-2	Soga2 (+113934), Ddx11 (+212296)
chr17	66545648	66545820	Merged-chr17-66545734-2	Rab12 (-26064), Themis3 (+48887)
chr17	66545970	66546142	Merged-chr17-66546056-2	Rab12 (-26386), Themis3 (+48565)
chr17	66546532	66546704	Merged-chr17-66546618-2	Rab12 (-26948), Themis3 (+48003)
chr17	66579277	66579449	Merged-chr17-66579363-2	Rab12 (-59693), Themis3 (+15258)
chr17	66720715	66720887	Merged-chr17-66720801-2	Themis3 (-126180), Ptprm (+633658)
chr17	67124937	67125109	Merged-chr17-67125023-2	Themis3 (-530402), Ptprm (+229436)
chr17	67996247	67996419	Merged-chr17-67996333-2	Arhgap28 (+7787), Lama1 (+299068)
chr17	69095584	69095756	Merged-chr17-69095670-2	Epb4.1l3 (-61140), Tmem200c (+258534)
chr17	69439204	69439376	Merged-chr17-69439290-1	A330050F15Rik (-36)
chr17	70192866	70193038	Merged-chr17-70192952-2	Dlgap1 (-231842), A330050F15Rik (+753626)
chr17	72603191	72603363	Merged-chr17-72603277-1	Alk (+432)
chr17	73054297	73054469	Merged-chr17-73054383-1	Lclat1 (-53611), Lbh (+136078)
chr17	75463456	75463628	Merged-chr17-75463542-2	Rasgrp3 (+27637), Fam98a (+88404)
chr17	79355842	79356014	Merged-chr17-79355928-2	Cdc42ep3 (-837)
chr17	79364768	79364940	Merged-chr17-79364854-2	Rmdn2 (-250046), Cdc42ep3 (-9763)
chr17	83494241	83494413	Merged-chr17-83494327-2	Cox7a2l (+20006), Eml4 (+143396)
chr17	84691759	84691931	Merged-chr17-84691845-1	Abcg8 (+8724), Lrpprc (+98713)
chr17	85045894	85046066	Merged-chr17-85045980-2	Slc3a1 (+17633), Prepl (+44287)
chr17	87072285	87072457	Merged-chr17-87072371-2	Gm5499 (-5892), Cript (+46821)
chr17	87235038	87235210	Merged-chr17-87235124-2	Mcfd2 (+30780), Socs5 (+127445)
chr17	87272574	87272746	Merged-chr17-87272660-2	Ttc7 (-10226), Mcfd2 (-6756)
chr17	87282793	87282965	Merged-chr17-87282879-2	Ttc7 (-7)
chr17	87670177	87670349	Merged-chr17-87670263-1	Msh2 (-2067)
chr17	87919215	87919387	Merged-chr17-87919301-2	Rpl36-ps4 (-1676)
chr17	88707927	88708099	Merged-chr17-88708013-2	Gtf2a1l (+39353), Lhcgr (+83963)
chr17	89934071	89934243	Merged-chr17-89934157-2	Gm10184 (-23708)
chr18	5163333	5163505	Merged-chr18-5163419-2	Zfp438 (+171020), Svil (+242879)
chr18	6280700	6280872	Merged-chr18-6280786-2	Rpl27-ps3 (-51804), Kif5b (-39263)
chr18	6308307	6308479	Merged-chr18-6308393-2	Kif5b (-66870), Rpl27-ps3 (-24197)
chr18	9865794	9865966	Merged-chr18-9865880-1	Gm17430 (-139210), Thoc1 (-92300)
chr18	11892326	11892498	Merged-chr18-11892412-2	Cables1 (+53192), Tmem241 (+229068)
chr18	14512244	14512416	Merged-chr18-14512330-2	Gm5160 (+87462), Ss18 (+170584)
chr18	18058726	18058898	Merged-chr18-18058812-2	NONE
chr18	20801995	20802167	Merged-chr18-20802081-1	B4galt6 (-55677), Trappc8 (+93997)
chr18	21028705	21028877	Merged-chr18-21028791-2	Mep1b (-43553), Rnf138 (+27450)
chr18	22649504	22649676	Merged-chr18-22649590-2	Asxl3 (+304501), Nol4 (+389066)
chr18	24132947	24133119	Merged-chr18-24133033-2	Galnt1 (-72734), Ino80c (-11080)
chr18	24259019	24259191	Merged-chr18-24259105-2	2700062C07Rik (-211756), Galnt1 (+53338)
chr18	25493476	25493648	Merged-chr18-25493562-2	Celf4 (+260421), AW554918 (+324542)
chr18	25505971	25506143	Merged-chr18-25506057-2	Celf4 (+247926), AW554918 (+337037)
chr18	31777725	31777897	Merged-chr18-31777811-2	Polr2d (-11348), Ammecr1l (+17987)
chr18	32138613	32138785	Merged-chr18-32138699-1	Proc (+871)
chr18	33889801	33889973	Merged-chr18-33889887-2	Epb4.1l4a (+117319), Gm10549 (+425724)
chr18	33950569	33950741	Merged-chr18-33950655-2	Epb4.1l4a (+56551), Gm10549 (+486492)
chr18	35022558	35022730	Merged-chr18-35022644-1	Ctnna1 (-96244), Hspa9 (-68287)
chr18	35341831	35342003	Merged-chr18-35341917-2	Lrrtm2 (-126893), Sil1 (+157008)
chr18	35815583	35815755	Merged-chr18-35815669-2	Cxxc5 (-14149), Ube2d2a (+44110)
chr18	35823390	35823562	Merged-chr18-35823476-2	Cxxc5 (-6342), Ube2d2a (+51917)
chr18	36348657	36348829	Merged-chr18-36348743-1	Cystm1 (-31)
chr18	37826290	37826462	Merged-chr18-37826376-2	Pcdhga11 (+6830), Diap1 (+109100)
chr18	38014298	38014470	Merged-chr18-38014384-1	Arap3 (-16810), Pcdh1 (+195378)
chr18	39321989	39322161	Merged-chr18-39322075-1	Nr3c1 (+168599), Arhgap26 (+328930)
chr18	42740726	42740898	Merged-chr18-42740812-2	Gpr151 (-161160), Ppp2r2b (+318659)
chr18	42975894	42976066	Merged-chr18-42975980-1	Gpr151 (-396328), Ppp2r2b (+83491)
chr18	43663554	43663726	Merged-chr18-43663640-2	Eif3j2 (-185804), Jakmip2 (+24133)
chr18	43687709	43687881	Merged-chr18-43687795-2	Jakmip2 (-22)
chr18	46879098	46879270	Merged-chr18-46879184-2	Arl14epl (-46798), 4833403I15Rik (+29145)
chr18	47170032	47170204	Merged-chr18-47170118-2	Sema6a (+198712), Commd10 (+211256)
chr18	57376332	57376504	Merged-chr18-57376418-2	Ctxn3 (-92068), Prrc1 (+21685)
chr18	57454102	57454274	Merged-chr18-57454188-2	Ctxn3 (-14298), Prrc1 (+99455)
chr18	60735257	60735429	Merged-chr18-60735343-2	Rps14 (-39167), Ndst1 (-21954)
chr18	63790704	63790876	Merged-chr18-63790790-2	St8sia3 (-463569), Wdr7 (+82095)
chr18	64405607	64405779	Merged-chr18-64405693-2	Onecut2 (+65329), Fech (+83373)
chr18	64965097	64965269	Merged-chr18-64965183-2	Nedd4l (+77427), Alpk2 (+428704)
chr18	65925223	65925395	Merged-chr18-65925309-2	Rax (+13780), Grp (+52489)
chr18	66861687	66861859	Merged-chr18-66861773-2	Mc4r (-1301)
chr18	68659959	68660131	Merged-chr18-68660045-2	Mc2r (-230794), 4930546C10Rik (+290096)
chr18	69204207	69204379	Merged-chr18-69204293-1	4930546C10Rik (-254152), Tcf4 (-140217)
chr18	69469434	69469606	Merged-chr18-69469520-2	Ccdc68 (-455946), Tcf4 (+125010)
chr18	70193938	70194110	Merged-chr18-70194024-2	Stard6 (-278430), Rab27b (-52419)
chr18	72949293	72949465	Merged-chr18-72949379-2	Mex3c (-623665), Dcc (-598310)
chr18	74794062	74794234	Merged-chr18-74794148-2	Acaa2 (+14951), Lipg (+167115)
chr18	74869088	74869260	Merged-chr18-74869174-2	Acaa2 (+89977), Lipg (+92089)
chr18	75306509	75306681	Merged-chr18-75306595-2	Smad7 (-60934), Dym (+287823)
chr18	75607259	75607431	Merged-chr18-75607345-1	Ctif (+90351), Smad7 (+239816)
chr18	75677602	75677774	Merged-chr18-75677688-1	Ctif (+20008), Smad7 (+310159)
chr18	76378949	76379121	Merged-chr18-76379035-2	Skor2 (-477370), Smad2 (+137455)
chr18	76657811	76657983	Merged-chr18-76657897-2	Skor2 (-198508), Smad2 (+416317)
chr18	77272793	77272965	Merged-chr18-77272879-2	Gm7276 (-86622), Loxhd1 (-9079)
chr18	77488723	77488895	Merged-chr18-77488809-1	Rnf165 (+76327), Loxhd1 (+206851)
chr18	77555575	77555747	Merged-chr18-77555661-2	Rnf165 (+9475), Loxhd1 (+273703)
chr18	77719736	77719908	Merged-chr18-77719822-2	Rnf165 (-154686), Haus1 (+47958)
chr18	80104789	80104961	Merged-chr18-80104875-2	Adnp2 (+46607), Pard6g (+57980)
chr18	81401408	81401580	Merged-chr18-81401494-2	Sall3 (-414916)
chr18	81669258	81669430	Merged-chr18-81669344-2	Sall3 (-682766), Galr1 (+737433)
chr18	81956537	81956709	Merged-chr18-81956623-2	Sall3 (-970045), Galr1 (+450154)
chr18	82477337	82477509	Merged-chr18-82477423-2	Mbp (+2261), Zfp236 (+215460)
chr18	82590953	82591125	Merged-chr18-82591039-2	Zfp236 (+101844), Mbp (+115877)
chr18	82934207	82934379	Merged-chr18-82934293-2	Zfp516 (+23414)
chr18	83289537	83289709	Merged-chr18-83289623-2	Zfp516 (+378744), Tshz1 (+796781)
chr18	83310776	83310948	Merged-chr18-83310862-2	Zfp516 (+399983), Tshz1 (+775542)
chr18	83543712	83543884	Merged-chr18-83543798-1	Tshz1 (+542606), Zfp516 (+632919)
chr18	83582619	83582791	Merged-chr18-83582705-2	Tshz1 (+503699), Zfp516 (+671826)
chr18	83840954	83841126	Merged-chr18-83841040-2	Tshz1 (+245364), Zfp516 (+930161)
chr18	85483436	85483608	Merged-chr18-85483522-2	Neto1 (-911430), Timm21 (-531998)
chr19	3451813	3451985	Merged-chr19-3451899-2	Gal (-37427), Ppp6r3 (+123850)
chr19	3923694	3923866	Merged-chr19-3923780-2	Ndufs8 (-11063), Aldh3b1 (+5981)
chr19	4057695	4057867	Merged-chr19-4057781-1	Gstp2 (-15616), BC021614 (+1514)
chr19	4586804	4586976	Merged-chr19-4586890-2	Lrfn4 (+28612), Pcx (+76418)
chr19	5637465	5637637	Merged-chr19-5637551-1	Rela (+68)
chr19	5810688	5810860	Merged-chr19-5810774-2	Scyl1 (-39373), Frmd8 (+64500)
chr19	5893343	5893515	Merged-chr19-5893429-2	Tigd3 (+678)
chr19	6322014	6322186	Merged-chr19-6322100-2	Men1 (-12879), Cdc42bpg (+15644)
chr19	6364164	6364336	Merged-chr19-6364250-2	Sf1 (+560)
chr19	6954075	6954247	Merged-chr19-6954161-1	Bad (+12300), Plcb3 (+15598)
chr19	6976139	6976311	Merged-chr19-6976225-2	Ppp1r14b (+1177), Fkbp2 (+4215)
chr19	7057736	7057908	Merged-chr19-7057822-2	Macrod1 (+1054), Flrt1 (+47907)
chr19	10072049	10072221	Merged-chr19-10072135-2	Fads2 (+29368), Fads3 (+30587)
chr19	10655384	10655556	Merged-chr19-10655470-2	Vwce (+21237), Pga5 (+22601)
chr19	16251960	16252132	Merged-chr19-16252046-2	Gna14 (-183621), Gnaq (+119215)
chr19	16598974	16599146	Merged-chr19-16599060-2	Gna14 (+163393), Vps13a (+181762)
chr19	21784439	21784611	Merged-chr19-21784525-2	Trpm3 (-354594), Tmem2 (+6183)
chr19	21816335	21816507	Merged-chr19-21816421-2	Trpm3 (-322698), Tmem2 (+38079)
chr19	22887122	22887294	Merged-chr19-22887208-2	Klf9 (-254018), Trpm3 (+748089)
chr19	23133352	23133524	Merged-chr19-23133438-2	Klf9 (-7788), Trpm3 (+994319)
chr19	23133881	23134053	Merged-chr19-23133967-1	Klf9 (-7259), Trpm3 (+994848)
chr19	24225017	24225189	Merged-chr19-24225103-2	Tjp2 (-77)
chr19	27279293	27279465	Merged-chr19-27279379-2	Kcnv2 (-43209), Vldlr (+62022)
chr19	27279904	27280076	Merged-chr19-27279990-2	Kcnv2 (-42598), Vldlr (+62633)
chr19	28946871	28947043	Merged-chr19-28946957-2	Ppapdc2 (-16963), Slc1a1 (+111883)
chr19	29999310	29999482	Merged-chr19-29999396-1	Trpd52l3 (-4394)
chr19	31255955	31256127	Merged-chr19-31256041-2	Cstf2t (+173200), Prkg1 (+408329)
chr19	31461110	31461282	Merged-chr19-31461196-2	Prkg1 (+203174), Cstf2t (+378355)
chr19	32242348	32242520	Merged-chr19-32242434-1	Asah2 (-180965), Sgms1 (+106882)
chr19	36057103	36057275	Merged-chr19-36057189-2	Htr7 (+151)
chr19	38060216	38060388	Merged-chr19-38060302-2	Ffar4 (-36777), Cep55 (+5260)
chr19	38178410	38178582	Merged-chr19-38178496-2	Fra10ac1 (+45642), Pde6c (+45715)
chr19	42000524	42000696	Merged-chr19-42000610-2	Ankrd2 (-35428), Ubtd1 (+18847)
chr19	42162337	42162509	Merged-chr19-42162423-1	Zfyve27 (-8144), Marveld1 (+15023)
chr19	42170726	42170898	Merged-chr19-42170812-1	Zfyve27 (+245)
chr19	43675566	43675738	Merged-chr19-43675652-1	Slc25a28 (-771)
chr19	43707701	43707873	Merged-chr19-43707787-2	Entpd7 (+18115), Cox15 (+45213)
chr19	44258456	44258628	Merged-chr19-44258542-1	Scd2 (-35134), Scd3 (+55254)
chr19	44790961	44791133	Merged-chr19-44791047-2	Fam178a (-140072), Pax2 (+34998)
chr19	44904467	44904639	Merged-chr19-44904553-2	Fam178a (-26566), Pax2 (+148504)
chr19	44930789	44930961	Merged-chr19-44930875-2	Fam178a (-244)
chr19	45024772	45024944	Merged-chr19-45024858-2	Lzts2 (+9682), Pdzd7 (+21756)
chr19	45815437	45815609	Merged-chr19-45815523-1	Kcnip2 (+538)
chr19	46518122	46518294	Merged-chr19-46518208-2	Trim8 (+16560), Arl3 (+54877)
chr19	46518644	46518816	Merged-chr19-46518730-2	Trim8 (+17082), Arl3 (+54355)
chr19	47019436	47019608	Merged-chr19-47019522-2	Nt5c2 (-4369)
chr19	47222635	47222807	Merged-chr19-47222721-2	Neurl1a (+43901), Sh3pxd2a (+241690)
chr19	47328011	47328183	Merged-chr19-47328097-2	Sh3pxd2a (+136314), Neurl1a (+149277)
chr19	47655001	47655173	Merged-chr19-47655087-2	Col17a1 (+37007), Slk (+75068)
chr19	48807439	48807611	Merged-chr19-48807525-1	Sorcs3 (+601500)
chr19	53579207	53579379	Merged-chr19-53579293-1	Nutf2-ps1 (+9774), Dusp5 (+50184)
chr19	55271593	55271765	Merged-chr19-55271679-1	Acsl5 (+18310), Zdhhc6 (+44353)
chr19	56236074	56236246	Merged-chr19-56236160-2	Habp2 (-51762), Tcf7l2 (+494350)
chr19	56874265	56874437	Merged-chr19-56874351-2	Vwa2 (+102)
chr19	57670792	57670964	Merged-chr19-57670878-2	Atrnl1 (+59844), Gfra1 (+784520)
chr19	57672312	57672484	Merged-chr19-57672398-2	Atrnl1 (+61364), Gfra1 (+783000)
chr19	57707806	57707978	Merged-chr19-57707892-2	Atrnl1 (+96858), Gfra1 (+747506)
chr19	58691318	58691490	Merged-chr19-58691404-2	Pnliprp1 (-37483), Pnlip (+21039)
chr19	59034607	59034779	Merged-chr19-59034693-1	4930506M07Rik (+41376), Eno4 (+91268)
chr19	61001459	61001631	Merged-chr19-61001545-2	Grk5 (+111796), Gm7102 (+174764)
chr19	61224640	61224812	Merged-chr19-61224726-2	Csf2ra (+3692), Gm6020 (+40836)
chr2	6547270	6547442	Merged-chr2-6547356-1	Usp6nl (+194623), Celf2 (+337640)
chr2	6872519	6872691	Merged-chr2-6872605-2	Celf2 (+12391), Usp6nl (+519872)
chr2	6877208	6877380	Merged-chr2-6877294-2	Celf2 (+7702), Usp6nl (+524561)
chr2	6969781	6969953	Merged-chr2-6969867-1	Gm10115 (-18187)
chr2	11593553	11593725	Merged-chr2-11593639-2	Pfkfb3 (-91549), Rbm17 (+9596)
chr2	11594121	11594293	Merged-chr2-11594207-2	Pfkfb3 (-92117), Rbm17 (+9028)
chr2	11679319	11679491	Merged-chr2-11679405-2	Il15ra (-26372), Il2ra (+36613)
chr2	16683022	16683194	Merged-chr2-16683108-2	Plxdc2 (+326804)
chr2	18392560	18392732	Merged-chr2-18392646-2	Dnajc1 (+184)
chr2	18893406	18893578	Merged-chr2-18893492-2	Pip4k2a (+104634), BC061194 (+194469)
chr2	20768901	20769073	Merged-chr2-20768987-2	Arhgap21 (+198734), Etl4 (+479074)
chr2	25035033	25035205	Merged-chr2-25035119-2	Nsmf (-19236), Pnpla7 (+59086)
chr2	25797659	25797831	Merged-chr2-25797745-2	Glt6d1 (+18103), Lcn11 (+20728)
chr2	26170973	26171145	Merged-chr2-26171059-2	Nacc2 (-78882), Lhx3 (+35516)
chr2	26342307	26342479	Merged-chr2-26342393-1	Dnlz (+9717), Gpsm1 (+22620)
chr2	26446222	26446394	Merged-chr2-26446308-1	Sec16a (-1092)
chr2	26497242	26497414	Merged-chr2-26497328-2	Sec16a (-52112), Notch1 (+6494)
chr2	26547557	26547729	Merged-chr2-26547643-1	Notch1 (-43821), Egfl7 (-33413)
chr2	27436432	27436604	Merged-chr2-27436518-2	Vav2 (-9485), Brd3 (+39155)
chr2	28607443	28607615	Merged-chr2-28607529-1	Gtf3c5 (-24250), Gfi1b (+14453)
chr2	29261272	29261444	Merged-chr2-29261358-2	Med27 (-85461), Ntng2 (-13318)
chr2	29493452	29493624	Merged-chr2-29493538-2	Rapgef1 (-126182), Med27 (+146719)
chr2	29751368	29751540	Merged-chr2-29751454-2	Gm13547 (-10074), Rapgef1 (+131734)
chr2	29755789	29755961	Merged-chr2-29755875-2	Gm13547 (-5653), Rapgef1 (+136155)
chr2	30779837	30780009	Merged-chr2-30779923-2	1700001O22Rik (+21784), Cstad (+184883)
chr2	30938882	30939054	Merged-chr2-30938968-1	Ptges (-35671), Tor1b (-13991)
chr2	30942878	30943050	Merged-chr2-30942964-2	Ptges (-39667), Tor1b (-9995)
chr2	31869794	31869966	Merged-chr2-31869880-2	Fibcd1 (-23875), Lamc3 (-17464)
chr2	31870773	31870945	Merged-chr2-31870859-2	Fibcd1 (-24854), Lamc3 (-16485)
chr2	31957338	31957510	Merged-chr2-31957424-2	Nup214 (-17012), Aif1l (+7164)
chr2	32167974	32168146	Merged-chr2-32168060-2	Pomt1 (-68530), Prrc2b (+16912)
chr2	32174271	32174443	Merged-chr2-32174357-2	Pomt1 (-62233), Prrc2b (+23209)
chr2	32809361	32809533	Merged-chr2-32809447-2	1700019L03Rik (-25019), Stxbp1 (+37717)
chr2	33617096	33617268	Merged-chr2-33617182-2	Zbtb43 (-154829), Lmx1b (+23329)
chr2	34073342	34073514	Merged-chr2-34073428-1	Mvb12b (-185482), Pbx3 (+298822)
chr2	34920327	34920499	Merged-chr2-34920413-2	Phf19 (-6437), Traf1 (+37721)
chr2	35565535	35565707	Merged-chr2-35565621-1	Ggta1 (-104172), Dab2ip (-56416)
chr2	38418056	38418228	Merged-chr2-38418142-1	Nek6 (-93501), Lhx2 (+67383)
chr2	38976486	38976658	Merged-chr2-38976572-2	Wdr38 (-21747), Olfml2a (+44594)
chr2	40148684	40148856	Merged-chr2-40148770-2	Ppp6c (-922319)
chr2	42893428	42893600	Merged-chr2-42893514-2	Kynu (-661815), Lrp1b (-239916)
chr2	52927836	52928008	Merged-chr2-52927922-1	Fmnl2 (+70054), Prpf40a (+263303)
chr2	58532334	58532506	Merged-chr2-58532420-2	Acvr1c (-174525), Acvr1 (+34406)
chr2	58665492	58665664	Merged-chr2-58665578-2	Acvr1 (-98752), Upp2 (-89602)
chr2	58711649	58711821	Merged-chr2-58711735-2	Acvr1 (-144909), Upp2 (-43445)
chr2	60688975	60689147	Merged-chr2-60689061-1	Itgb6 (-15350), Rbms1 (+192377)
chr2	60710436	60710608	Merged-chr2-60710522-2	Itgb6 (-36811), Rbms1 (+170916)
chr2	62664331	62664503	Merged-chr2-62664417-1	Gca (+132)
chr2	65923152	65923324	Merged-chr2-65923238-2	Csrnp3 (+77471), Galnt3 (+201756)
chr2	68364226	68364398	Merged-chr2-68364312-2	Stk39 (+107956), B3galt1 (+246599)
chr2	71189050	71189222	Merged-chr2-71189136-2	Dync1i2 (-22570), Cybrd1 (+71213)
chr2	71387831	71388003	Merged-chr2-71387917-2	Hat1 (-1343)
chr2	71743306	71743478	Merged-chr2-71743392-2	Itga6 (-43586), Gm1631 (+23975)
chr2	73048922	73049094	Merged-chr2-73049008-1	Gm11084 (-62292), Ola1 (+165439)
chr2	73725030	73725202	Merged-chr2-73725116-2	Chrna1 (-144778), Chn1 (+50230)
chr2	75407503	75407675	Merged-chr2-75407589-2	Hnrnpa3 (-251672), Mtx2 (+581786)
chr2	75750478	75750650	Merged-chr2-75750564-2	Agps (-81613), Nfe2l2 (-45923)
chr2	76347088	76347260	Merged-chr2-76347174-2	Pde11a (-8400), Cyct (+13276)
chr2	77506023	77506195	Merged-chr2-77506109-1	Sestd1 (-240341), Zfp385b (+213630)
chr2	78189686	78189858	Merged-chr2-78189772-2	Ube2e3 (-679275), Cwc22 (-243397)
chr2	79569436	79569608	Merged-chr2-79569522-2	Neurod1 (-112771), Ssfa2 (-65830)
chr2	84837203	84837375	Merged-chr2-84837289-2	Slc43a1 (-2119)
chr2	91035489	91035661	Merged-chr2-91035575-2	Rapsn (-66)
chr2	91904770	91904942	Merged-chr2-91904856-2	Chrm4 (-17333), Ambra1 (+174631)
chr2	92669579	92669751	Merged-chr2-92669665-2	Syt13 (-245433), Chst1 (+69958)
chr2	92947971	92948143	Merged-chr2-92948057-2	Syt13 (+32959), Prdm11 (+97514)
chr2	93433016	93433188	Merged-chr2-93433102-2	Tspan18 (-98615), Cd82 (+29400)
chr2	101665478	101665650	Merged-chr2-101665564-2	Rag1 (-16063), Traf6 (-12876)
chr2	102116649	102116821	Merged-chr2-102116735-2	Ldlrad3 (+69650), Commd9 (+230482)
chr2	103302868	103303040	Merged-chr2-103302954-2	Ehf (+324)
chr2	104572810	104572982	Merged-chr2-104572896-2	Hipk3 (-78450), Cstf3 (-17627)
chr2	104878938	104879110	Merged-chr2-104879024-2	Prrg4 (-29148), Ccdc73 (-7300)
chr2	105257799	105257971	Merged-chr2-105257885-2	0610012H03Rik (+33565), Rcn1 (+141434)
chr2	105258535	105258707	Merged-chr2-105258621-2	0610012H03Rik (+34301), Rcn1 (+140698)
chr2	105263334	105263506	Merged-chr2-105263420-2	0610012H03Rik (+39100), Rcn1 (+135899)
chr2	105370252	105370424	Merged-chr2-105370338-2	Rcn1 (+28981), 0610012H03Rik (+146018)
chr2	105616566	105616738	Merged-chr2-105616652-1	Rcn1 (-217333), Pax6 (-59476)
chr2	107061756	107061928	Merged-chr2-107061842-2	Fshb (-2186)
chr2	112455402	112455574	Merged-chr2-112455488-1	Emc7 (+491)
chr2	113829015	113829187	Merged-chr2-113829101-2	Scg5 (+20)
chr2	114235702	114235874	Merged-chr2-114235788-2	Zfp770 (-34319), Atpbd4 (+419176)
chr2	117337009	117337181	Merged-chr2-117337095-1	Rasgrp1 (+5906), Fam98b (+87356)
chr2	118534211	118534383	Merged-chr2-118534297-2	Srp14 (-54586), Bmf (+15390)
chr2	121101543	121101715	Merged-chr2-121101629-2	Tgm5 (-15788), Tgm7 (+8166)
chr2	121534931	121535103	Merged-chr2-121535017-2	Wdr76 (+28234), Frmd5 (+272070)
chr2	122377428	122377600	Merged-chr2-122377514-2	Slc28a2 (-48963), Shf (-8596)
chr2	125134203	125134375	Merged-chr2-125134289-2	Ctxn2 (-2403)
chr2	126147827	126147999	Merged-chr2-126147913-2	Dtwd1 (-4228), Fam227b (+4091)
chr2	128912034	128912206	Merged-chr2-128912120-2	Zc3h8 (+31957), Fbln7 (+49139)
chr2	130780738	130780910	Merged-chr2-130780824-2	Slc4a11 (-83305), 4930402H24Rik (+59310)
chr2	130875226	130875398	Merged-chr2-130875312-2	4930402H24Rik (-35178), Atrn (-31183)
chr2	135887933	135888105	Merged-chr2-135888019-2	Lamp5 (-169908), Plcb4 (+146189)
chr2	139711514	139711686	Merged-chr2-139711600-2	Ism1 (+33422), Tasp1 (+355160)
chr2	141312252	141312424	Merged-chr2-141312338-2	Flrt3 (-640869)
chr2	144369145	144369317	Merged-chr2-144369231-2	Csrp2bp (+248)
chr2	145555810	145555982	Merged-chr2-145555896-2	Rin2 (-230220), Slc24a3 (+310924)
chr2	151990986	151991158	Merged-chr2-151991072-2	Fam110a (-17137), Slc52a3 (-5463)
chr2	151999958	152000130	Merged-chr2-152000044-2	Scrt2 (-81485), Slc52a3 (+3509)
chr2	152804411	152804583	Merged-chr2-152804497-2	Bcl2l1 (+26169), Cox4i2 (+49403)
chr2	152816420	152816592	Merged-chr2-152816506-2	Bcl2l1 (+14160), Cox4i2 (+61412)
chr2	154343591	154343763	Merged-chr2-154343677-1	Cdk5rap1 (+29333), Bpifb9b (+36450)
chr2	154427896	154428068	Merged-chr2-154427982-2	Snta1 (-19883), Cbfa2t2 (-8513)
chr2	154465983	154466155	Merged-chr2-154466069-2	1700003F12Rik (-82819), Cbfa2t2 (+29574)
chr2	154639304	154639476	Merged-chr2-154639390-2	4930519P11Rik (-25953), Chmp4b (-17628)
chr2	155050580	155050752	Merged-chr2-155050666-2	Ahcy (+23831), Gm14226 (+32400)
chr2	155696054	155696226	Merged-chr2-155696140-1	Trpc4ap (-3756)
chr2	156878092	156878264	Merged-chr2-156878178-1	Sla2 (+8900), 1110008F13Rik (+15050)
chr2	157027357	157027529	Merged-chr2-157027443-2	Dsn1 (-20289), Soga1 (+51811)
chr2	157837605	157837777	Merged-chr2-157837691-2	Vstm2l (-76962), Ctnnbl1 (+100290)
chr2	158799358	158799530	Merged-chr2-158799444-1	Dhx35 (+4637)
chr2	161545536	161545708	Merged-chr2-161545622-2	Chd6 (-436600)
chr2	162139852	162140024	Merged-chr2-162139938-1	Ptprt (+521209)
chr2	163449376	163449548	Merged-chr2-163449462-2	2310001K24Rik (-23083), Gdap1l1 (+10986)
chr2	163481725	163481897	Merged-chr2-163481811-2	R3hdml (-10507), Fitm2 (-9182)
chr2	164655788	164655960	Merged-chr2-164655874-2	Wfdc10 (-172), Wfdc9 (+709)
chr2	164671027	164671199	Merged-chr2-164671113-2	Wfdc9 (-14530), Wfdc11 (+2974)
chr2	164940221	164940393	Merged-chr2-164940307-2	Zfp335 (-28550), Mmp9 (-7912)
chr2	165239631	165239803	Merged-chr2-165239717-1	Cdh22 (-4864)
chr2	165470203	165470375	Merged-chr2-165470289-2	Ocstamp (-69884), Slc13a3 (+2941)
chr2	165563430	165563602	Merged-chr2-165563516-2	Eya2 (-91782), Slc2a10 (+59729)
chr2	165630021	165630193	Merged-chr2-165630107-2	Eya2 (-25191), Slc2a10 (+126320)
chr2	165693052	165693224	Merged-chr2-165693138-2	Eya2 (+37840), Zmynd8 (+165035)
chr2	166215253	166215425	Merged-chr2-166215339-2	Sulf2 (-59676), Prex1 (+498493)
chr2	166389665	166389837	Merged-chr2-166389751-2	Sulf2 (-234088), Prex1 (+324081)
chr2	166887908	166888080	Merged-chr2-166887994-2	Cse1l (-18065), Arfgef2 (+82406)
chr2	167004182	167004354	Merged-chr2-167004268-2	Ddx27 (-10925), Stau1 (-8003)
chr2	167074722	167074894	Merged-chr2-167074808-2	Znfx1 (-11793), Kcnb1 (+113991)
chr2	167075297	167075469	Merged-chr2-167075383-1	Znfx1 (-12368), Kcnb1 (+113416)
chr2	167109620	167109792	Merged-chr2-167109706-2	Znfx1 (-46691), Kcnb1 (+79093)
chr2	167268075	167268247	Merged-chr2-167268161-2	Ptgis (-27557), B4galt5 (+81022)
chr2	167540238	167540410	Merged-chr2-167540324-2	Snai1 (+2129), Ube2v1 (+91771)
chr2	167578587	167578759	Merged-chr2-167578673-2	Snai1 (+40478), Ube2v1 (+53422)
chr2	167582361	167582533	Merged-chr2-167582447-2	Snai1 (+44252), Ube2v1 (+49648)
chr2	167672406	167672578	Merged-chr2-167672492-2	Cebpb (-16423), Tmem189 (-10936)
chr2	167689757	167689929	Merged-chr2-167689843-2	Cebpb (+928)
chr2	168023732	168023904	Merged-chr2-168023818-2	Pard6b (-57186), Fam65c (-13200)
chr2	168423184	168423356	Merged-chr2-168423270-2	Kcng1 (-142138), Nfatc2 (+166990)
chr2	168545762	168545934	Merged-chr2-168545848-2	Kcng1 (-264716), Nfatc2 (+44412)
chr2	168950776	168950948	Merged-chr2-168950862-2	Sall4 (-183661), Zfp64 (+4410)
chr2	169421465	169421637	Merged-chr2-169421551-2	Zfp64 (-466279), 1700101G07Rik (-160530)
chr2	169617624	169617796	Merged-chr2-169617710-2	Gm11011 (-29965), Tshz2 (-15966)
chr2	170465694	170465866	Merged-chr2-170465780-2	Bcas1 (-37952), Cyp24a1 (+31365)
chr2	171844876	171845048	Merged-chr2-171844962-1	Cbln4 (+198504)
chr2	172977414	172977586	Merged-chr2-172977500-1	Spo11 (-2349)
chr2	173027059	173027231	Merged-chr2-173027145-2	Rbm38 (+6647), Ctcfl (+92380)
chr2	173155885	173156057	Merged-chr2-173155971-2	Pck1 (+2923), Zbp1 (+62952)
chr2	173249937	173250109	Merged-chr2-173250023-1	Zbp1 (-31100), Pmepa1 (+26510)
chr2	173292667	173292839	Merged-chr2-173292753-2	1700021F07Rik (-229833), Pmepa1 (-16220)
chr2	173732532	173732704	Merged-chr2-173732618-2	Vapb (-4893)
chr2	177094149	177094321	Merged-chr2-177094235-2	Gm14401 (+13979), Gm14410 (+108594)
chr2	177319112	177319284	Merged-chr2-177319198-1	Gm14409 (-52162), Gm14412 (+5109)
chr2	178531340	178531512	Merged-chr2-178531426-2	Cdh4 (-911005), Cdh26 (+100819)
chr2	178603493	178603665	Merged-chr2-178603579-2	Cdh4 (-838852), Cdh26 (+172972)
chr2	179193780	179193952	Merged-chr2-179193866-1	Cdh4 (-248565), Cdh26 (+763259)
chr2	179220702	179220874	Merged-chr2-179220788-2	Cdh4 (-221643), Cdh26 (+790181)
chr2	179391972	179392144	Merged-chr2-179392058-2	Cdh4 (-50373), Cdh26 (+961451)
chr2	180545565	180545737	Merged-chr2-180545651-2	Mrgbp (-37061), Ntsr1 (+45675)
chr2	180761900	180762072	Merged-chr2-180761986-2	Bhlhe23 (+14914), Slc17a9 (+36723)
chr2	180854770	180854942	Merged-chr2-180854856-2	Bhlhe23 (-77956), Ythdf1 (+66093)
chr3	6173849	6174021	Merged-chr3-6173935-1	Pex2 (-597785), 1700008P02Rik (+446508)
chr3	7805220	7805392	Merged-chr3-7805306-1	Stmn2 (-704221), Il7 (-191879)
chr3	8702960	8703132	Merged-chr3-8703046-2	Hey1 (-36007), Mrps28 (+220872)
chr3	8850899	8851071	Merged-chr3-8850985-2	Hey1 (-183946), Mrps28 (+72933)
chr3	9002511	9002683	Merged-chr3-9002597-2	Zbtb10 (-248005), Tpd52 (-38549)
chr3	9540526	9540698	Merged-chr3-9540612-2	Zfp704 (+69473), Zbtb10 (+290010)
chr3	15098230	15098402	Merged-chr3-15098316-1	Car2 (+211890), Gm9733 (+233986)
chr3	18695543	18695715	Merged-chr3-18695629-1	Cyp7b1 (-452291), Armc1 (+467436)
chr3	21935857	21936029	Merged-chr3-21935943-1	Tbl1xr1 (-140709)
chr3	27440934	27441106	Merged-chr3-27441020-2	Ghsr (+69669), Fndc3b (+269419)
chr3	28220051	28220223	Merged-chr3-28220137-2	Tnik (-43426), Pld1 (+281442)
chr3	31975056	31975228	Merged-chr3-31975142-2	Kcnmb2 (+72439), Zmat3 (+390536)
chr3	32238538	32238710	Merged-chr3-32238624-2	Zmat3 (+127054), Kcnmb2 (+335921)
chr3	33142892	33143064	Merged-chr3-33142978-2	Ttc14 (-657273), Pex5l (-59949)
chr3	33631412	33631584	Merged-chr3-33631498-2	Pex5l (-548469), Ttc14 (-168753)
chr3	33991000	33991172	Merged-chr3-33991086-1	Ccdc39 (-146785), Gm9791 (+14425)
chr3	34648923	34649095	Merged-chr3-34649009-1	Sox2 (-996)
chr3	35965861	35966033	Merged-chr3-35965947-2	Dcun1d1 (-32981), Mccc1 (+34731)
chr3	36551384	36551556	Merged-chr3-36551470-2	Exosc9 (-1136)
chr3	37724242	37724414	Merged-chr3-37724328-2	Gm5148 (+1)
chr3	37966214	37966386	Merged-chr3-37966300-2	Gm5148 (-241971), Ankrd50 (+518544)
chr3	37966585	37966757	Merged-chr3-37966671-2	Gm5148 (-242342), Ankrd50 (+518173)
chr3	40745649	40745821	Merged-chr3-40745735-2	Hspa4l (+305)
chr3	41595111	41595283	Merged-chr3-41595197-2	Phf17 (+31814), Sclt1 (+147317)
chr3	51416525	51416697	Merged-chr3-51416611-1	Naa15 (+595)
chr3	52831282	52831454	Merged-chr3-52831368-2	Cog6 (+185855), Foxo1 (+563031)
chr3	52990072	52990244	Merged-chr3-52990158-1	Cog6 (+27065), Foxo1 (+721821)
chr3	53151727	53151899	Merged-chr3-53151813-2	Lhfp (+110285), Nhlrc3 (+311478)
chr3	54678952	54679124	Merged-chr3-54679038-2	Supt20 (-13785), Gm5641 (+197609)
chr3	55226927	55227099	Merged-chr3-55227013-2	Dclk1 (-15513), Sohlh2 (+44985)
chr3	57760517	57760689	Merged-chr3-57760603-2	Rnf13 (+24537), Pfn2 (+86961)
chr3	58592810	58592982	Merged-chr3-58592896-2	2810407C02Rik (+16260), Fam194a (+44311)
chr3	58871938	58872110	Merged-chr3-58872024-2	Siah2 (-179624), Clrn1 (+13188)
chr3	62536195	62536367	Merged-chr3-62536281-2	Dhx36 (-29277), Gpr149 (+68859)
chr3	65958003	65958175	Merged-chr3-65958089-2	Ccnl1 (+160)
chr3	68810505	68810677	Merged-chr3-68810591-2	1110032F04Rik (-58995), Il12a (+119947)
chr3	71568042	71568214	Merged-chr3-71568128-2	NONE
chr3	83129740	83129912	Merged-chr3-83129826-1	Gm10710 (-580)
chr3	84040171	84040343	Merged-chr3-84040257-1	D930015E06Rik (-96)
chr3	85209957	85210129	Merged-chr3-85210043-2	Pet112 (-364076), Fbxw7 (+394775)
chr3	85813400	85813572	Merged-chr3-85813486-2	Fam160a1 (-67220), Glt28d2 (+74030)
chr3	86863682	86863854	Merged-chr3-86863768-2	Mab21l2 (-315485), Dclk2 (+57116)
chr3	88147586	88147758	Merged-chr3-88147672-2	Mef2d (+5300), Rhbg (+107037)
chr3	88150489	88150661	Merged-chr3-88150575-2	Mef2d (+8203), Rhbg (+104134)
chr3	88473082	88473254	Merged-chr3-88473168-2	Sema4a (-17429), Lmna (+30167)
chr3	88630201	88630373	Merged-chr3-88630287-2	Arhgef2 (+9181), Rxfp4 (+22855)
chr3	88643206	88643378	Merged-chr3-88643292-2	Rxfp4 (+9850), Arhgef2 (+22186)
chr3	89090853	89091025	Merged-chr3-89090939-1	Rusc1 (+2424), Ash1l (+125127)
chr3	89436356	89436528	Merged-chr3-89436442-1	Pbxip1 (-264)
chr3	90224487	90224659	Merged-chr3-90224573-2	Jtb (-7024), Rab13 (+3786)
chr3	94386744	94386916	Merged-chr3-94386830-2	Lingo4 (-11687), Rorc (+14036)
chr3	95164100	95164272	Merged-chr3-95164186-1	Sema6c (+3681), Gabpb2 (+53730)
chr3	95702136	95702308	Merged-chr3-95702222-2	Adamtsl4 (-14305), Ecm1 (+37347)
chr3	95950832	95951004	Merged-chr3-95950918-2	Anp32e (+21672), Plekho1 (+45083)
chr3	96033144	96033316	Merged-chr3-96033230-2	Plekho1 (-37229), Vps45 (+25236)
chr3	96328335	96328507	Merged-chr3-96328421-1	Fcgr1 (-34452), BC107364 (+123885)
chr3	96532537	96532709	Merged-chr3-96532623-2	Txnip (-25334), Hfe2 (+7438)
chr3	97026328	97026500	Merged-chr3-97026414-2	Gja8 (-100394), Gja5 (-6002)
chr3	98024414	98024586	Merged-chr3-98024500-2	Adam30 (-136312), Notch2 (+10962)
chr3	99350110	99350282	Merged-chr3-99350196-2	Spag17 (-535221), Tbx15 (+96436)
chr3	100694085	100694257	Merged-chr3-100694171-2	Vtcn1 (-131288), Man1a2 (-8668)
chr3	101454914	101455086	Merged-chr3-101455000-2	Igsf3 (+77875), Atp1a1 (+149603)
chr3	101796344	101796516	Merged-chr3-101796430-1	Atp1a1 (-191827), Mab21l3 (+39793)
chr3	101831637	101831809	Merged-chr3-101831723-2	Atp1a1 (-227120), Mab21l3 (+4500)
chr3	102063419	102063591	Merged-chr3-102063505-2	Casq2 (-22910), Nhlh2 (+53360)
chr3	104438891	104439063	Merged-chr3-104438977-2	Gm5546 (-72364), Lrig2 (+72879)
chr3	107681291	107681463	Merged-chr3-107681377-2	Strip1 (-49667), Ahcyl1 (+15183)
chr3	108035913	108036085	Merged-chr3-108035999-2	Gstm1 (-18026), Gstm4 (+8895)
chr3	108856910	108857082	Merged-chr3-108856996-2	Stxbp3a (-16485), Fndc7 (+33012)
chr3	116807810	116807982	Merged-chr3-116807896-2	Agl (+270)
chr3	117010299	117010471	Merged-chr3-117010385-2	Palmd (-41398), 1700061I17Rik (+67380)
chr3	118500187	118500359	Merged-chr3-118500273-2	Snx7 (-631337), Dpyd (-61856)
chr3	119113245	119113417	Merged-chr3-119113331-1	Dpyd (+551202), Ptbp2 (+670057)
chr3	121195179	121195351	Merged-chr3-121195265-2	Rwdd3 (-23571), Tmem56 (+67894)
chr3	121430333	121430505	Merged-chr3-121430419-2	Cnn3 (+3878), Slc44a3 (+101925)
chr3	121480299	121480471	Merged-chr3-121480385-2	Slc44a3 (+51959), Cnn3 (+53844)
chr3	121530520	121530692	Merged-chr3-121530606-2	Slc44a3 (+1738), Cnn3 (+104065)
chr3	121736549	121736721	Merged-chr3-121736635-2	F3 (+13098), Abcd3 (+78667)
chr3	121999925	122000097	Merged-chr3-122000011-2	Abca4 (-44432), Arhgap29 (+46782)
chr3	126558918	126559090	Merged-chr3-126559004-2	Camk2d (-38339), Arsj (+195177)
chr3	129918512	129918684	Merged-chr3-129918598-2	Casp6 (+17173), Ccdc109b (+51608)
chr3	131591704	131591876	Merged-chr3-131591790-2	Dkk2 (-493502), Papss1 (+27022)
chr3	132951232	132951404	Merged-chr3-132951318-1	Npnt (-1158)
chr3	133462597	133462769	Merged-chr3-133462683-2	Tet2 (+81707), Ppa2 (+152573)
chr3	135021006	135021178	Merged-chr3-135021092-1	Cenpe (-191471), Tacr3 (+192085)
chr3	135438303	135438475	Merged-chr3-135438389-2	Ube2d3 (-370)
chr3	136699804	136699976	Merged-chr3-136699890-2	Emcn (-641177), Ppp3ca (+29120)
chr3	142394336	142394508	Merged-chr3-142394422-1	Bmpr1b (-412158), Pdlim5 (+1274)
chr3	144643668	144643840	Merged-chr3-144643754-2	Sep15 (+73328), Sh3glb1 (+76569)
chr3	144720193	144720365	Merged-chr3-144720279-2	Sh3glb1 (+44)
chr3	145690985	145691157	Merged-chr3-145691071-2	Ddah1 (-67604), Cyr61 (-41086)
chr3	145756201	145756373	Merged-chr3-145756287-2	Ddah1 (-2388)
chr3	146404418	146404590	Merged-chr3-146404504-2	Ssx2ip (-138)
chr3	148696657	148696829	Merged-chr3-148696743-2	Lphn2 (+257892)
chr3	152944818	152944990	Merged-chr3-152944904-2	St6galnac5 (+37342), Pigk (+230791)
chr3	153127922	153128094	Merged-chr3-153128008-2	St6galnac5 (-145762), St6galnac3 (+597054)
chr3	153384683	153384855	Merged-chr3-153384769-2	St6galnac5 (-402523), St6galnac3 (+340293)
chr3	154664207	154664379	Merged-chr3-154664293-2	4922501L14Rik (-46840), Cryz (+67094)
chr3	158031503	158031675	Merged-chr3-158031589-2	Srsf11 (+5050), Ankrd13c (+84123)
chr4	5690538	5690710	Merged-chr4-5690624-2	Ubxn2b (-500474), Fam110b (+46503)
chr4	6093474	6093646	Merged-chr4-6093560-2	Ubxn2b (-97538), Fam110b (+449439)
chr4	7856752	7856924	Merged-chr4-7856838-1	Tox (-866039), Car8 (+382203)
chr4	8799537	8799709	Merged-chr4-8799623-2	Clvs1 (-469694), Chd7 (+108258)
chr4	8927382	8927554	Merged-chr4-8927468-1	Clvs1 (-341849), Chd7 (+236103)
chr4	11053849	11054021	Merged-chr4-11053935-2	Plekhf2 (-46259), Ndufaf6 (+22269)
chr4	11056002	11056174	Merged-chr4-11056088-2	Plekhf2 (-48412), Ndufaf6 (+20116)
chr4	11647790	11647962	Merged-chr4-11647876-1	Gem (-56581), Fsbp (+68211)
chr4	13300261	13300433	Merged-chr4-13300347-2	Runx1t1 (-450950)
chr4	15010855	15011027	Merged-chr4-15010941-2	Necab1 (+138190), Tmem55a (+146865)
chr4	31723608	31723780	Merged-chr4-31723694-2	Map3k7 (-240403)
chr4	33198205	33198377	Merged-chr4-33198291-2	Srsf12 (-10700), Pm20d2 (-8858)
chr4	33555336	33555508	Merged-chr4-33555422-1	Cnr1 (-369210), Rngtt (+245111)
chr4	34239715	34239887	Merged-chr4-34239801-2	Akirin2 (-311136), Spaca1 (-189610)
chr4	34873051	34873223	Merged-chr4-34873137-2	Smim8 (-94800), Zfp292 (+9823)
chr4	43371864	43372036	Merged-chr4-43371950-2	Rusc2 (-34485), Atp8b5 (+104780)
chr4	43969468	43969640	Merged-chr4-43969554-2	Ccin (-13950), Glipr2 (+12153)
chr4	44028381	44028553	Merged-chr4-44028467-2	Clta (+15789), Gne (+55710)
chr4	44633895	44634067	Merged-chr4-44633981-1	Pax5 (+77465), Melk (+333105)
chr4	45139855	45140027	Merged-chr4-45139941-2	Frmpd1 (-63984), Tomm5 (-31833)
chr4	45165613	45165785	Merged-chr4-45165699-2	Tomm5 (-57591), Frmpd1 (-38226)
chr4	45473323	45473495	Merged-chr4-45473409-2	Slc25a51 (-64643), Shb (+56921)
chr4	45490064	45490236	Merged-chr4-45490150-2	Slc25a51 (-81384), Shb (+40180)
chr4	45524748	45524920	Merged-chr4-45524834-1	Slc25a51 (-116068), Shb (+5496)
chr4	45588440	45588612	Merged-chr4-45588526-2	Aldh1b1 (-210496), Shb (-58196)
chr4	46378898	46379070	Merged-chr4-46378984-2	5830415F09Rik (+10439), Foxe1 (+35375)
chr4	46756913	46757085	Merged-chr4-46756999-2	Tbc1d2 (-106790), Gabbr2 (+234874)
chr4	48036048	48036220	Merged-chr4-48036134-2	Nr4a3 (-9019), Sec61b (+561476)
chr4	48812717	48812889	Merged-chr4-48812803-2	E130309F12Rik (-246479), Murc (+149289)
chr4	49837994	49838166	Merged-chr4-49838080-2	Ppp3r2 (-156056), Grin3a (+7469)
chr4	53789491	53789663	Merged-chr4-53789577-2	Tmem38b (-36468), Tal2 (+9872)
chr4	55203842	55204014	Merged-chr4-55203928-2	Rad23b (-146115), Zfp462 (+255952)
chr4	56942869	56943041	Merged-chr4-56942955-2	Ctnnal1 (-77767), Tmem245 (+4456)
chr4	57812233	57812405	Merged-chr4-57812319-1	Akap2 (-41840), Gm20459 (+174496)
chr4	57855464	57855636	Merged-chr4-57855550-2	Akap2 (+1391), D630039A03Rik (+60747)
chr4	57988018	57988190	Merged-chr4-57988104-2	Txn1 (-31693), Txndc8 (+21020)
chr4	59199787	59199959	Merged-chr4-59199873-1	Ugcg (+10616), Susd1 (+238760)
chr4	59779641	59779813	Merged-chr4-59779727-1	Inip (+4139), E130308A19Rik (+153484)
chr4	59878682	59878854	Merged-chr4-59878768-2	Slc46a2 (+36288), Snx30 (+72928)
chr4	59945129	59945301	Merged-chr4-59945215-2	Slc46a2 (-30159), Mup4 (+15495)
chr4	61824873	61825045	Merged-chr4-61824959-2	Mup19 (-42690), Mup5 (+10274)
chr4	62262324	62262496	Merged-chr4-62262410-2	Zfp37 (-53964), Slc31a2 (-24039)
chr4	62516266	62516438	Merged-chr4-62516352-1	Hdhd3 (-14076), Alad (+3542)
chr4	63445332	63445504	Merged-chr4-63445418-2	Akna (-42064), Whrn (+50533)
chr4	69099245	69099417	Merged-chr4-69099331-2	Dbc1 (-144934)
chr4	74251916	74252088	Merged-chr4-74252002-2	Kdm4c (+66)
chr4	80912030	80912202	Merged-chr4-80912116-2	Lurap1l (+1470), Mpdz (+530691)
chr4	82238271	82238443	Merged-chr4-82238357-1	Mpdz (-795550), Nfib (+266951)
chr4	85516168	85516340	Merged-chr4-85516254-1	Adamtsl1 (-537661), Sh3gl2 (+310813)
chr4	99205936	99206108	Merged-chr4-99206022-2	Gm10305 (-66649), Atg4c (+12088)
chr4	99766818	99766990	Merged-chr4-99766904-2	Alg6 (+51239), Itgb3bp (+62282)
chr4	101455243	101455415	Merged-chr4-101455329-2	Dnajc6 (-95265), Ak4 (+36040)
chr4	101550667	101550839	Merged-chr4-101550753-1	Dnajc6 (+159)
chr4	102025780	102025952	Merged-chr4-102025866-2	Pde4b (-229137), Gm12789 (+39240)
chr4	105223981	105224153	Merged-chr4-105224067-2	Ppap2b (+66720)
chr4	107366558	107366730	Merged-chr4-107366644-2	Tmem48 (-1140)
chr4	107429458	107429630	Merged-chr4-107429544-2	Glis1 (-5175), Tmem48 (+61760)
chr4	107490173	107490345	Merged-chr4-107490259-2	Glis1 (+55540), Dmrtb1 (+193971)
chr4	107713024	107713196	Merged-chr4-107713110-2	Lrp8 (-89303), Dmrtb1 (-28880)
chr4	109017488	109017660	Merged-chr4-109017574-2	Nrd1 (+16919), Osbpl9 (+184698)
chr4	110156011	110156183	Merged-chr4-110156097-2	Elavl4 (+130792), Dmrta2 (+178044)
chr4	117317834	117318006	Merged-chr4-117317920-2	Tmem53 (+65969), Rnf220 (+179132)
chr4	117737650	117737822	Merged-chr4-117737736-2	Dmap1 (-55463), Klf17 (+27912)
chr4	118019392	118019564	Merged-chr4-118019478-1	Artn (-89715), St3gal3 (+115412)
chr4	118543943	118544115	Merged-chr4-118544029-2	Tmem125 (-301)
chr4	119921828	119922000	Merged-chr4-119921914-2	Edn2 (-239292), Hivep3 (+107419)
chr4	120616857	120617029	Merged-chr4-120616943-2	Cited4 (-49620), Gm8439 (+28198)
chr4	121241434	121241606	Merged-chr4-121241520-2	Rlf (-52986), Gm12888 (+83397)
chr4	123071651	123071823	Merged-chr4-123071737-2	Bmp8b (-33428), Trit1 (+55140)
chr4	123228384	123228556	Merged-chr4-123228470-2	Heyl (-5086), Nt5c1a (+26966)
chr4	123805428	123805600	Merged-chr4-123805514-1	4933427I04Rik (-54165), Rhbdl2 (+17639)
chr4	125502953	125503125	Merged-chr4-125503039-2	Csf3r (-521511), Grik3 (+12339)
chr4	125651921	125652093	Merged-chr4-125652007-2	Csf3r (-372543), Grik3 (+161307)
chr4	125946047	125946219	Merged-chr4-125946133-2	Csf3r (-78417), Grik3 (+455433)
chr4	126111358	126111530	Merged-chr4-126111444-1	Eva1b (-36300), Stk40 (+7487)
chr4	126115999	126116171	Merged-chr4-126116085-2	Eva1b (-31659), Stk40 (+12128)
chr4	126248658	126248830	Merged-chr4-126248744-1	Thrap3 (-45984), Map7d1 (+7539)
chr4	128737368	128737540	Merged-chr4-128737454-1	A3galt2 (-21804), Phc2 (+82752)
chr4	129578561	129578733	Merged-chr4-129578647-1	Fam167b (-98)
chr4	129659129	129659301	Merged-chr4-129659215-1	Txlna (-18410), Kpna6 (+13552)
[truncated: 831 more rows]

## Sheet: ASCL1_ATAC
Chr	Start	End	PeakID
[truncated: 2,139 more rows]

[truncated: 5 more sheets: ASCL2_ATAC, MYOD1_ATAC, ASCL1_H3K27ac, ASCL2_H3K27ac, MYOD1_H3K27ac]
