# Supplementary material for: Intrinsic DNA binding properties demonstrated for lineage-specifying basic helix-loop-helix transcription factors
Source: HighWire-hosted journal article supplement (doi:10.1101/gr.224360.117), 2018-03-02
Supplement: Supplemental_Table_S2.xlsx [file Supplemental_Table_S2.xlsx]

## Sheet: Legend
Legend:
RNA-seq_rpkm sheet contains normalized expression values for all genes in the genome
RPKM values were calculated using EdgeR function
RPKM values were normalized using TMM method
Binding site information & average RPKM values for each bHLH factor were also provided

## Sheet: RNA-seq_rpkm
RNA-seq data for bHLH induced and uninduced mES cells
GeneID	Symbol	ASCL1_BS_info	ASCL2_BS_info	MYOD1_BS_info	ASCL1.ctrl_ES_24h.rep1	ASCL1.ctrl_ES_24h.rep2	ASCL1.ctrl_ES_24h.rep3	ASCL1.ind_ES_24h.rep1	ASCL1.ind_ES_24h.rep2	ASCL1.ind_ES_24h.rep3	ASCL2.ctrl_ES_24h.rep1	ASCL2.ctrl_ES_24h.rep2	ASCL2.ctrl_ES_24h.rep3	ASCL2.ind_ES_24h.rep1	ASCL2.ind_ES_24h.rep2	ASCL2.ind_ES_24h.rep3	MYOD1.ctrl_ES_24h.rep1	MYOD1.ctrl_ES_24h.rep2	MYOD1.ctrl_ES_24h.rep3	MYOD1.ind_ES_24h.rep1	MYOD1.ind_ES_24h.rep2	MYOD1.ind_ES_24h.rep3	ASCL1_ctrl_avg	ASCL1_ind_avg	ASCL2_ctrl_avg	ASCL2_ind_avg	MYOD1_ctrl_avg	MYOD1_ind_avg
497097	Xkr4	chr1-91 (-280)	Merged-chr1-3670777-2 (+721)	No_BS	0.0665279	0.0217007	0	0.249086	0.0693199	0.0278577	0.0720743	0.0800548	0.0130129	0.411805	0.183481	0.130118	0.0984272	0.0731084	0.0636548	0.447145	0.0844435	0.128844	0.0294095	0.115421	0.0550473	0.241801	0.0783968	0.220144
19888	Rp1	No_BS	No_BS	No_BS	0.0035434	0	0.00925742	0.00960696	0	0	0.00383881	0.00373088	0	0	0	0	0	0.00454286	0	0	0	0.00480372	0.00426694	0.00320232	0.00252323	0	0.00151429	0.00160124
20671	Sox17	No_BS	No_BS	No_BS	0.210852	1.35767	0.0771214	0.2744	1.15855	0.284298	1.04164	7.3085	0.230959	0.819784	5.4058	0.45138	0.571724	13.127	0.192062	0.488377	8.27639	0.285848	0.548548	0.572417	2.86037	2.22566	4.63026	3.01687
27395	Mrpl15	chr1-60 (-16958)	Merged-chr1-4802730-2 (-16991)	No_BS	38.1959	64.3122	61.8909	41.9046	68.6787	63.6303	51.4003	49.557	54.3354	43.8157	51.382	58.1607	50.8999	63.1568	48.7091	37.648	50.1504	58.3128	54.7997	58.0712	51.7642	51.1194	54.2553	48.7037
18777	Lypla1	chr1-60 (-5126)	Merged-chr1-4802730-2 (-5093)	Merged-chr1-4834756-2 (+26933)	71.8005	108.939	100.765	100.22	133.944	142.033	80.6161	66.7362	96.0353	105.695	100.979	118.499	81.0848	89.1592	86.4247	93.2789	89.9148	119.277	93.8349	125.399	81.1292	108.391	85.5562	100.824
21399	Tcea1	No_BS	No_BS	Merged-chr1-4834756-2 (-23282)	103.103	166.834	154.776	105.523	156.54	173.17	129.375	110.219	143.345	113.993	131.527	131.736	127.406	141.501	130.067	112.218	115.535	143.837	141.571	145.078	127.646	125.752	132.991	123.863
58175	Rgs20	No_BS	No_BS	No_BS	0.46728	0.219667	0.251343	0.894284	0.517918	0.342418	1.28048	1.38919	0.827977	2.09231	1.89268	1.09475	1.37158	1.44485	1.23347	3.00092	2.61863	1.6955	0.312763	0.584873	1.16588	1.69325	1.34997	2.43835
108664	Atp6v1h	No_BS	No_BS	No_BS	44.0108	53.7376	57.4681	42.1439	53.0971	69.4453	46.6764	47.186	70.4067	44.1917	51.425	58.8231	46.7017	64.7159	67.9683	44.954	49.3846	78.5024	51.7389	54.8954	54.7564	51.4799	59.7953	57.6137
18387	Oprk1	No_BS	No_BS	No_BS	0.0293499	0.0167539	0.0383395	0.0795743	0.0445982	0.0430146	0.0238476	0.0463542	0.140651	0.0601491	0.056662	0.073059	0.0552654	0.0658498	0.0982884	0.0354066	0.0869252	0.069631	0.0281478	0.055729	0.0702842	0.06329	0.0731345	0.0639876
226304	Npbwr1	No_BS	No_BS	No_BS	0.00935468	0	0	0	0	0	0	0	0	0	0	0	0	0	0.012531	0	0	0.012682	0.00311823	0	0	0	0.00417699	0.00422732
12421	Rb1cc1	No_BS	No_BS	No_BS	7.03886	6.11655	7.63886	7.44221	5.9527	8.69965	6.54768	5.65137	8.16111	8.17415	6.01222	7.12571	6.5532	5.30396	7.61004	8.34358	5.7779	8.71181	6.93142	7.36486	6.78672	7.10403	6.48907	7.6111
620393	Fam150a	No_BS	No_BS	Merged-chr1-6458155-1 (+98824)	0.080507	0	0.157748	0.145515	0	0.0589947	0.0436094	0	0.0551151	0.0471398	0.0518081	0.150301	0.0378983	0.103215	0.0539211	0.0971205	0	0.109142	0.0794184	0.0681699	0.0329082	0.083083	0.0650115	0.0687541
240690	St18	No_BS	No_BS	Merged-chr1-6458155-1 (-29076)	0	0.0191999	0.00732284	0	0.0272584	0.00821578	0	0.0177073	0	0	0.0216449	0.00697713	0	0	0	0	0.0332054	0.00759971	0.00884091	0.0118247	0.00590243	0.00954067	0	0.0136017
319263	Pcmtd1	chr1-194 (+688440)	No_BS	Merged-chr1-7313679-2 (+224759)	9.20868	8.03375	17.8843	9.62878	8.98756	20.1812	8.53178	6.24153	19.0619	11.9977	7.40006	14.7148	8.73826	5.16253	14.6345	11.8416	6.93398	19.0706	11.7089	12.9325	11.2784	11.3709	9.51175	12.6154
71096	Sntg1	No_BS	No_BS	No_BS	0.0285355	0.0217186	0.0186379	0.00859625	0	0.0487913	0.0103048	0.0100151	0	0.0111391	0.00612109	0.0236773	0.00895532	0.0243896	0.0318537	0	0	0.0386851	0.022964	0.0191292	0.00677332	0.0136458	0.0217329	0.012895
59014	Rrs1	No_BS	Merged-chr1-9545710-2 (+302)	No_BS	43.5935	46.7271	43.1554	40.8299	41.8822	44.4633	45.5287	40.8572	33.0421	40.7027	43.1274	45.6098	42.1702	37.0363	41.4978	34.9918	34.9621	44.3984	44.492	42.3918	39.8093	43.1466	40.2348	38.1175
76187	Adhfe1	No_BS	Merged-chr1-9545710-2 (-2238)	No_BS	0.517127	0.640631	0.962973	0.288365	0.69551	0.806267	0.476799	0.45181	0.768311	0.30924	0.28322	0.547768	0.445435	0.324442	0.795882	0.265465	0.358452	0.536982	0.70691	0.596714	0.56564	0.380076	0.52192	0.386966
72481	2610203C22Rik	chr1-195 (-40570)	No_BS	No_BS	0	0.0316708	0.0362378	0	0.0337227	0.0406566	0	0	0	0	0.0357039	0	0.0261179	0	0	0	0	0	0.0226362	0.0247931	0	0.0119013	0.00870596	0
76982	3110035E14Rik	No_BS	No_BS	No_BS	0	0	0	0	0	0.0158825	0	0	0.014838	0	0	0.0134879	0	0	0	0	0.0213972	0	0	0.00529416	0.00494601	0.00449598	0	0.00713239
17864	Mybl1	chr1-195 (+28547)	No_BS	No_BS	3.35396	3.29904	6.65335	3.55092	3.12527	6.58108	2.60506	3.67005	8.84293	3.50575	3.04131	5.71825	2.56402	3.11839	7.52816	2.93425	3.32481	7.20553	4.43545	4.41909	5.03935	4.08844	4.40352	4.4882
70675	Vcpip1	No_BS	No_BS	Merged-chr1-9747901-1 (+481)	4.89597	4.48944	5.51166	4.99779	4.34963	5.72685	4.20647	4.50598	5.09801	4.93699	4.46383	5.31319	4.27264	4.05595	4.85469	4.98746	4.16194	5.4559	4.96569	5.02476	4.60349	4.90467	4.39443	4.86843
73331	1700034P13Rik	No_BS	No_BS	No_BS	0.0462349	0.0527847	0.0301981	0.0626767	0.196716	0.067761	0.125224	0.170384	0.316525	0.216578	0.148766	0.143862	0.0870596	0.118552	0.278701	0.055776	0.114111	0.0626798	0.0430726	0.109051	0.204044	0.169736	0.161438	0.0775223
170755	Sgk3	No_BS	No_BS	No_BS	3.34928	4.22366	6.29377	3.60449	4.45994	8.115	2.8562	3.57178	6.07518	3.43287	4.35813	5.57595	2.52844	4.94006	3.93494	2.18703	3.56738	3.93237	4.62223	5.39315	4.16772	4.45565	3.80114	3.22893
240697	Mcmdc2	No_BS	No_BS	No_BS	1.60986	1.91514	2.08527	1.88281	1.79253	1.487	1.17248	1.36742	1.68558	1.67931	1.0621	1.347	1.19725	1.05799	1.44972	1.38719	1.4691	1.72395	1.87009	1.72078	1.40849	1.3628	1.23499	1.52675
73824	Snhg6	No_BS	No_BS	No_BS	67.8869	54.3497	90.1212	58.8982	43.9447	123.745	52.8616	29.5744	107.358	44.8185	31.673	87.6621	48.176	31.3328	89.6869	45.35	32.3371	104.343	70.786	75.5294	63.2648	54.7178	56.3985	60.6766
266793	Snord87	No_BS	No_BS	No_BS	7.46756	7.45977	18.2903	11.3885	6.24097	21.2046	7.58449	2.9485	17.254	6.5588	4.20486	19.7504	6.59124	5.98369	15.6298	6.75644	8.29372	19.6146	11.0725	12.9447	9.26234	10.1713	9.40159	11.5549
100039596	Tcf24	chr1-117 (-35028)	Merged-chr1-9997863-2 (-35054)	Merged-chr1-9997903-2 (-35094)	0.728367	0.663135	0.734671	0.674921	0.706097	0.783719	0.699193	0.689244	0.593319	0.755797	0.901843	0.665561	0.720473	0.862891	0.703969	0.811939	0.82829	0.674954	0.708724	0.721579	0.660585	0.774401	0.762444	0.771728
69312	Ppp1r42	chr1-117 (+11299)	Merged-chr1-9997863-2 (+11273)	Merged-chr1-9997903-2 (+11233)	0.0239511	0.0546882	0.0312871	0	0	0.0351022	0	0	0.0983817	0	0.0308262	0	0	0	0.128334	0	0	0.0324701	0.0366421	0.0117007	0.0327939	0.0102754	0.0427779	0.0108234
26754	Cops5	No_BS	No_BS	No_BS	73.623	88.2248	112.699	67.9004	82.3519	129.061	78.1257	79.2123	126.883	72.2864	84.3528	100.828	79.8428	101.952	110.779	71.1582	77.3296	126.465	91.5157	93.1045	94.7403	85.8225	97.5246	91.6509
211660	Cspp1	No_BS	No_BS	No_BS	7.94822	6.04947	8.13415	8.77462	6.13282	7.51007	6.35072	5.41214	8.13489	7.71019	6.04391	8.49059	7.28902	3.88486	6.34355	7.22482	5.48174	7.71044	7.37728	7.47251	6.63258	7.4149	5.83914	6.80567
211673	Arfgef1	No_BS	No_BS	No_BS	10.7016	8.6397	9.65491	12.2778	8.52573	10.5088	11.4397	11.8411	9.99901	13.5777	11.621	10.9388	11.7101	10.8529	9.71669	15.0932	13.1408	11.7753	9.66541	10.4374	11.0933	12.0458	10.7599	13.3364
329093	Cpa6	No_BS	No_BS	No_BS	0	0	0	0	0	0	0	0	0.0243757	0.0208484	0	0	0	0	0	0.0214767	0	0	0	0	0.00812522	0.00694948	0	0.00715888
100124448	Mir467e	No_BS	No_BS	No_BS	0	0	0	0	0	0	0	0	0	0	0	0	0	0	0	0	0	0	0	0	0	0	0	0
109294	Prex2	chr1-45 (+402142)	Merged-chr1-11401362-2 (+407897)	No_BS	3.59669	3.49997	3.34327	3.9508	3.13375	3.46589	3.22761	2.08041	2.37564	4.17584	2.58674	2.34393	3.76993	2.70734	2.29109	4.17131	2.46267	2.66609	3.47998	3.51681	2.56122	3.0355	2.92279	3.10002
320492	A830018L16Rik	chr1-196 (+2448)	Merged-chr1-11401362-2 (-12750)	Merged-chr1-11416604-2 (+2492), Merged-chr1-11505493-2 (+91381), Merged-chr1-12034614-1 (+620502)	0.412301	0.408899	0.467862	0.87696	0.632834	0.970478	0.446674	0.333261	0.587332	0.96567	0.793295	0.808613	0.423467	0.405791	0.624817	1.09023	0.883966	1.27034	0.429687	0.826757	0.455756	0.85586	0.484692	1.08151
102465961	Mir6341	No_BS	No_BS	No_BS	0	0	0	0	0	0	0	0	0	0	0	0	0	0	0	0	0	0	0	0	0	0	0	0
329096	Gm17644	No_BS	No_BS	No_BS	28.9899	23.2515	17.4261	39.2308	23.8657	13.6034	22.9295	18.1484	7.2411	44.1493	17.461	7.28077	24.0116	6.22678	8.9348	33.2016	12.4558	6.17463	23.2225	25.5667	16.1063	22.9637	13.0577	17.2773
240725	Sulf1	chr1-118 (-47622), chr1-53 (+122147)	Merged-chr1-12505409-2 (-187021), Merged-chr1-12814564-2 (+122134)	Merged-chr1-12034614-1 (-657816), Merged-chr1-12644810-2 (-47620), Merged-chr1-12814620-2 (+122190)	14.5066	11.4545	11.5294	25.2386	19.5163	17.6495	16.4622	16.2835	12.6486	30.0351	24.5561	20.079	18.4177	13.1272	15.2946	27.3767	19.5718	18.6556	12.4969	20.8015	15.1314	24.8901	15.6132	21.868
240726	Slco5a1	chr1-53 (+176600)	Merged-chr1-12814564-2 (+176613)	Merged-chr1-12814620-2 (+176557)	0.568117	0.365995	0.312754	0.264051	0.217052	0.136788	0.395666	0.440087	0.316703	0.218601	0.182798	0.146469	0.55016	0.286143	0.358765	0.210502	0.176271	0.132032	0.415622	0.205963	0.384152	0.182623	0.398356	0.172935
383491	Prdm14	No_BS	No_BS	No_BS	7.65872	9.47359	13.8149	6.39186	8.88917	12.181	7.84989	4.93654	10.0669	6.7072	2.46857	13.3617	7.08522	3.82513	8.38574	3.72781	1.85407	5.76019	10.3157	9.154	7.61777	7.51248	6.43203	3.78069
17978	Ncoa2	No_BS	No_BS	No_BS	4.86786	3.68182	3.17412	5.06652	4.22609	2.58022	4.6013	3.95939	3.08816	5.39184	3.7591	3.23128	4.46466	2.7564	2.81477	6.07304	3.85257	2.57922	3.90794	3.95761	3.88295	4.12741	3.34528	4.16828
72265	Tram1	No_BS	No_BS	No_BS	26.3344	35.25	35.4275	26.8646	33.953	36.9784	30.0937	32.6456	33.2934	32.9697	38.4097	32.9808	30.7048	45.6033	29.0351	33.1845	37.2014	35.8283	32.3373	32.5987	32.0109	34.7868	35.1144	35.4047
212442	Lactb2	No_BS	No_BS	No_BS	41.2729	40.5795	45.9289	30.1213	28.7463	44.2601	33.8675	29.3694	51.9249	24.7348	23.3446	31.6644	34.464	34.0484	43.2732	25.3698	24.9173	34.0432	42.5938	34.3759	38.3873	26.5813	37.2619	28.1101
381246	Xkr9	No_BS	No_BS	No_BS	0	0.0204726	0.0468495	0	0.0217989	0.0788434	0	0	0.0245528	0	0.0230796	0.0223188	0.0337661	0	0.0960838	0.0432655	0	0.0243104	0.0224407	0.0335474	0.00818428	0.0151328	0.0432833	0.0225253
433273	Gm5523	No_BS	No_BS	No_BS	1.05416	0.538404	1.01466	1.10311	0.87679	0.609849	1.11199	0.671801	0.607727	1.49439	0.64267	0.621486	1.22754	0.960274	0.706042	1.1713	0.8216	1.05302	0.869073	0.863249	0.797172	0.919515	0.964619	1.01531
14048	Eya1	No_BS	No_BS	No_BS	0.659749	0.254096	0.446488	0.359183	0.222244	0.29124	0.576968	0.368252	0.304738	0.465431	0.306914	0.405623	0.681019	0.214008	0.415261	0.719184	0.290349	0.269401	0.453444	0.290889	0.416653	0.392656	0.436763	0.426311
17681	Msc	No_BS	No_BS	No_BS	3.41955	4.0188	6.91061	3.05404	3.83902	9.05041	1.85232	1.50373	4.95747	3.41565	2.48534	9.56359	2.31045	1.23786	5.98176	4.29508	2.91915	15.8982	4.78299	5.31449	2.77117	5.15486	3.17669	7.70413
277328	Trpa1	chr1-197 (-199411), chr1-161 (-98833)	Merged-chr1-15017715-2 (-98853)	No_BS	0.453694	0.212736	0.444493	0.615034	0.236367	0.569936	0.193096	0.281502	0.521364	0.512334	0.500508	0.625179	0.289852	0.373928	0.553479	0.469131	0.327927	0.812765	0.370308	0.473779	0.331987	0.546007	0.405753	0.536608
98741	Kcnb2	chr1-161 (-269564), chr1-197 (-168986)	Merged-chr1-15017715-2 (-269544)	No_BS	0	0	0	0	0	0	0.0211434	0.0136993	0.00890729	0.00761838	0	0.00809683	0.0122497	0	0	0.00784794	0.00642238	0	0	0	0.0145834	0.0052384	0.00408323	0.00475677
21749	Terf1	No_BS	No_BS	No_BS	50.8164	55.0771	66.938	48.8426	52.6846	60.4597	52.9082	46.7709	56.2753	52.7153	46.2937	50.2263	52.976	50.3706	46.9783	46.7718	45.6423	49.4643	57.6105	53.9956	51.9848	49.7451	50.1083	47.2928
226866	Sbspon	No_BS	No_BS	No_BS	0.175955	0.143487	0.29552	0.0795091	0.213896	0.110518	0.13616	0.145565	0.137668	0.132465	0.0323518	0.17207	0.0709973	0.0161133	0.218863	0.16678	0.223339	0.187424	0.204987	0.134641	0.139798	0.112295	0.101991	0.192514
75799	4930444P10Rik	No_BS	No_BS	No_BS	0.168567	0.0855319	0.0978656	0.101561	0.0227683	0.109799	0.0405823	0.0197207	0.153868	0.131603	0.0482119	0.0932453	0.123437	0.0240126	0.0752673	0.090379	0.0739619	0.126957	0.117321	0.0780427	0.0713903	0.09102	0.0742389	0.0970994
19989	Rpl7	No_BS	No_BS	No_BS	1867.65	1947.63	3995.21	1710.39	1905.02	5160.86	1869.04	1784.61	4599.68	1877.59	2075.59	3588.81	1854.95	2267.74	4017.76	1660.74	1806.56	4339.12	2603.5	2925.42	2751.11	2514	2713.48	2602.14
98711	Rdh10	No_BS	No_BS	Merged-chr1-16436654-2 (+330880)	3.13019	2.30224	3.22398	2.47528	1.79281	2.42611	3.24442	2.82046	4.75979	2.52016	2.76974	4.58893	4.10887	2.93266	4.33413	3.73984	2.98622	4.36596	2.88547	2.2314	3.60822	3.29294	3.79189	3.69734
29819	Stau2	No_BS	No_BS	Merged-chr1-16436654-2 (+82652)	2.09137	1.88283	1.8265	1.84686	2.2663	1.48875	3.2497	2.41594	2.63443	2.96697	2.90703	2.09725	2.57659	2.83449	2.30521	3.12846	2.72535	1.96036	1.93356	1.8673	2.76669	2.65708	2.5721	2.60472
66799	Ube2w	No_BS	Merged-chr1-16618815-1 (+471)	No_BS	5.95248	5.63822	8.89717	5.3204	5.12882	9.13127	5.02257	4.64031	10.031	4.51953	5.1881	7.23559	5.35788	5.29381	10.3175	5.45468	5.376	11.2732	6.82929	6.52683	6.56461	5.64774	6.98972	7.36795
67923	Tceb1	No_BS	No_BS	No_BS	107.265	65.6482	136.104	95.8288	58.383	163.301	88.5466	62.9436	173.359	70.8545	73.2633	120.721	91.9322	86.0085	165.728	74.7347	66.0863	170.275	103.006	105.838	108.283	88.2797	114.556	103.699
329101	D030040B21Rik	No_BS	No_BS	No_BS	0.0867153	0.113143	0.161822	0.111955	0.0602364	0.0907773	0.040262	0.0130434	0.152654	0.0435215	0.0318876	0.0462548	0.0349894	0.127057	0.132753	0.0149443	0.0489188	0.0503822	0.12056	0.0876562	0.0686531	0.0405546	0.0982663	0.0380818
70397	Tmem70	No_BS	No_BS	No_BS	21.6557	16.3002	20.5002	19.0306	14.8837	24.2566	19.1837	14.9281	22.4704	16.0429	17.298	20.5251	20.6891	17.9725	23.1589	16.5985	17.8357	23.5461	19.4854	19.3903	18.8607	17.9554	20.6068	19.3268
17087	Ly96	chr1-137 (+136485)	Merged-chr1-16824898-2 (+136442)	No_BS	0.28638	0.06539	0.299277	0.36234	0.487385	0.335771	0.186153	0.422146	0.470535	0.201224	0.368585	0.0712871	0.32355	0.293727	0.460342	0.345478	0.508902	0.310593	0.217016	0.395165	0.359612	0.213699	0.359206	0.388324
57339	Jph1	chr1-137 (+272948)	Merged-chr1-16824898-2 (+272991)	No_BS	2.37099	1.32883	0.638213	2.22718	1.38872	0.979285	1.79028	2.00472	1.4166	2.36433	2.47825	1.38607	2.65843	2.51472	1.67464	3.17231	3.35502	2.34742	1.44601	1.53173	1.7372	2.07622	2.2826	2.95825
14545	Gdap1	chr1-92 (+105614), chr1-39 (+361543)	Merged-chr1-17506940-2 (+361578)	Merged-chr1-17193278-2 (+47916)	0	0.0300459	0.0343785	0.0396406	0	0.0257137	0.0380156	0.0369468	0.0480455	0.0410932	0.0225813	0.043674	0.0330371	0.0337409	0.0352535	0.0105829	0.017321	0.0356783	0.0214748	0.0217848	0.0410026	0.0357828	0.0340105	0.0211941
94227	Pi15	chr1-92 (-350925), chr1-39 (-94996)	Merged-chr1-17506940-2 (-94961)	Merged-chr1-17193278-2 (-408623)	0.0897985	0.0797375	0.110786	0.103698	0.127355	0.0658034	0.0864754	0.0682859	0.116122	0.151899	0.070629	0.0993467	0.06106	0.0831476	0.0868751	0.138421	0.0837266	0.0811588	0.0934407	0.0989521	0.0902943	0.107292	0.0770275	0.101102
102634913	Gm16070	No_BS	No_BS	No_BS	1.3577	0.975305	1.375	1.29595	1.1683	1.07316	0.776763	0.963734	0.793716	0.875376	0.942431	0.626564	1.06283	0.547624	1.51217	0.809738	1.29518	1.03405	1.236	1.17914	0.844738	0.814791	1.04087	1.04632
83691	Crispld1	chr1-163 (+119481)	No_BS	No_BS	0.327615	0.167327	0.168932	0.786948	0.282973	0.265344	0.392288	0.272328	0.330526	0.615877	0.32179	0.482869	0.446436	0.342651	0.450402	1.17526	0.663884	1.65969	0.221291	0.445088	0.331714	0.473512	0.413163	1.16628
78081	Crisp4	chr1-163 (+290482)	No_BS	No_BS	0	0	0	0	0	0	0	0	0	0	0	0	0	0	0	0	0	0	0	0	0	0	0	0
654454	Defb44-ps	No_BS	No_BS	No_BS	0	0	0	0	0	0	0	0	0	0	0	0	0	0	0	0	0.153587	0	0	0	0	0	0	0.0511958
654460	Defb18	No_BS	No_BS	No_BS	0	0	0	0	0	0	0	0	0	0	0	0	0	0	0	0	0	0	0	0	0	0	0	0
77673	Defb41	No_BS	No_BS	No_BS	0	0	0	0	0	0	0.07978	0	0	0	0	0	0	0	0	0	0	0	0	0	0.0265933	0	0	0
654464	Gm15386	No_BS	No_BS	No_BS	0	0	0	0	0	0	0	0	0	0	0	0	0	0	0	0	0	0	0	0	0	0	0	0
226896	Tfap2d	No_BS	No_BS	No_BS	0.0197696	0.0225702	0	0.0178666	0	0	0.0214178	0.0208156	0	0	0	0.0246057	0.0186129	0.0760377	0.0264822	0	0.0195171	0	0.0141133	0.00595554	0.0140778	0.00820189	0.0403776	0.00650571
21419	Tfap2b	chr1-35 (+849607)	Merged-chr1-20058551-2 (+849637)	Merged-chr1-20058536-2 (+849622)	0	0.018193	0.00693879	0.0144016	0.0064572	0	0.00575467	0	0.0218189	0.0373232	0.0410194	0	0.00500104	0.0136202	0	0.012816	0.010488	0.00720114	0.00837725	0.00695292	0.00919118	0.0261142	0.00620708	0.0101684
241035	Pkhd1	chr1-35 (+559543)	Merged-chr1-20554566-1 (+63498), Merged-chr1-20058551-2 (+559513)	Merged-chr1-20058536-2 (+559528)	0.141591	0.158599	0.16751	0.152105	0.142894	0.101799	0.112876	0.112515	0.0804729	0.140785	0.099713	0.119701	0.105639	0.0685014	0.0894654	0.199815	0.0606604	0.0796783	0.1559	0.132266	0.101955	0.120066	0.0878687	0.113385
75028	4930486I03Rik	No_BS	No_BS	No_BS	0	0	0	0	0	0	0	0	0	0	0	0	0	0	0	0	0	0	0	0	0	0	0	0
105661730	Linc-md1	No_BS	No_BS	No_BS	0	0	0	0	0	0	0	0	0	0	0	0	0	0	0	0.0799706	0	0	0	0	0	0	0	0.0266569
387202	Mir206	No_BS	No_BS	No_BS	0	0	0	0	0	0	0	0	0	0	0	0	0	0	0	0	0	0	0	0	0	0	0	0
723817	Mir133b	No_BS	No_BS	No_BS	0	0	0	0	0	0	0	0	0	0	0	0	0	0	0	0	0	0	0	0	0	0	0	0
16171	Il17a	No_BS	No_BS	No_BS	0	0	0	0	0	0	0	0	0	0	0	0	0	0	0	0	0	0	0	0	0	0	0	0
257630	Il17f	No_BS	No_BS	No_BS	0.205231	0.234305	0.153195	0.211973	0.142563	0.343752	0.158815	0.18522	0.281003	0.137338	0.113204	0.401398	0.138017	0.0751771	0.314189	0.212214	0.173666	0.238481	0.197577	0.232762	0.208346	0.217313	0.175794	0.20812
17215	Mcm3	No_BS	No_BS	No_BS	141.561	155.986	147.166	141.583	161.596	134.822	152.662	141.276	133.313	158.855	152.268	166.135	152.804	134.74	126.562	162.183	148.425	140.676	148.238	146	142.417	159.086	138.035	150.428
77741	6720483E21Rik	No_BS	No_BS	No_BS	0.030837	0	0.0402822	0.0278687	0	0.0451941	0	0.0324687	0	0.0361125	0	0	0.0290328	0	0	0	0.0304432	0.0418052	0.0237064	0.0243543	0.0108229	0.0120375	0.00967761	0.0240828
74229	Paqr8	No_BS	No_BS	No_BS	0.781391	0.392518	0.469533	0.854474	0.550931	0.29775	0.922723	0.641733	0.524242	0.997423	0.643639	0.505719	0.735674	0.571023	0.512885	1.06518	0.493704	0.487286	0.547814	0.567718	0.696233	0.715594	0.606527	0.682058
71877	Efhc1	No_BS	No_BS	No_BS	0.782099	0.678599	0.858185	1.04609	0.665519	0.939907	1.0676	0.82348	0.920932	1.09908	0.704618	1.05129	0.913062	0.862323	0.670497	1.13219	1.23538	1.01787	0.772961	0.883838	0.937337	0.951661	0.815294	1.12848
170829	Tram2	No_BS	No_BS	No_BS	2.78288	2.4963	1.88254	2.69465	2.38618	1.31096	1.72279	2.64234	0.986601	2.32783	1.8548	1.57719	2.15219	2.48474	1.33135	2.39797	2.57563	0.842119	2.38724	2.1306	1.78391	1.91994	1.98942	1.93857
75712	Tmem14a	No_BS	No_BS	No_BS	2.17297	1.83871	3.00551	1.82519	1.52276	3.40946	1.85561	1.66886	3.7803	1.94596	1.44771	2.54544	1.90143	2.06484	3.49294	1.88123	2.04427	3.01517	2.33907	2.25247	2.43492	1.9797	2.4864	2.31356
14859	Gsta3	No_BS	No_BS	No_BS	1.35147	2.25315	6.52921	1.1826	1.35603	6.225	0.604247	0.496912	2.11478	0.602921	0.331314	2.10926	0.666493	0.605059	1.58046	0.491695	0.40238	2.21022	3.37794	2.92121	1.07198	1.0145	0.95067	1.03477
241041	Gm4956	No_BS	No_BS	No_BS	0	0.0686937	0	0	0	0	0	0.0316767	0	0	0	0	0	0	0	0	0.0297007	0	0.0228979	0	0.0105589	0	0	0.00990024
368204	Khdc1a	No_BS	No_BS	No_BS	0	0	0	0	0	0	0	0	0	0.0207415	0.0227956	0	0	0.0227073	0	0	0	0	0	0	0	0.0145124	0.00756911	0
433278	Khdc1c	No_BS	No_BS	No_BS	0	0	0	0	0	0	0	0	0	0	0	0	0	0	0	0	0	0	0	0	0	0	0	0
98582	Khdc1b	No_BS	No_BS	No_BS	0	0	0.0401567	0.013891	0	0	0	0	0	0.018	0	0.0191304	0	0.019706	0	0	0.0151742	0	0.0133856	0.00463032	0	0.0123768	0.00656865	0.00505806
226922	Kcnq5	No_BS	No_BS	No_BS	0.0940132	0.101682	0.0581725	0.0447178	0.114285	0.0217553	0.134014	0.718962	0.0880737	0.0695346	0.439419	0.0492677	0.0885127	1.16725	0.125934	0.167136	1.03559	0.13416	0.0846227	0.0602527	0.313683	0.186074	0.460565	0.44563
116837	Rims1	No_BS	No_BS	No_BS	0.348177	0.126037	0.155305	0.199542	0.154849	0.0373377	0.193202	0.196712	0.209294	0.248623	0.153017	0.105695	0.271839	0.185087	0.125131	0.204892	0.209592	0.149664	0.20984	0.130576	0.199736	0.169111	0.194019	0.188049
66755	4933415F23Rik	No_BS	No_BS	No_BS	0	0	0	0	0	0.0284368	0	0	0	0.0227225	0	0	0	0	0	0.0234071	0	0.0263044	0	0.00947892	0	0.00757415	0	0.0165705
387225	Mir30a	No_BS	No_BS	No_BS	0	0	0	0	0	0	0	0	0	0	0	0	0	0	0	0	0	0	0	0	0	0	0	0
723964	Mir30c-2	No_BS	No_BS	No_BS	0	0	0	0	0	0	0	0	0	0	0	0.511739	0	0	0	0	0	0	0	0	0	0.17058	0	0
70155	Ogfrl1	No_BS	No_BS	No_BS	3.72183	3.5409	4.18189	3.40869	3.44095	4.33655	3.84673	2.86024	5.19357	3.68222	3.40451	4.63227	3.65847	3.38219	4.23103	3.2943	3.21678	4.36901	3.81488	3.72873	3.96685	3.90633	3.75723	3.62669
280645	B3gat2	No_BS	No_BS	No_BS	0.0793054	0.0995941	0.279709	0.0931731	0.0867652	0.139474	0.0773253	0.0918516	0.195453	0.00928725	0.0714488	0.128317	0.0447992	0.0305024	0.159349	0.0861039	0.0861218	0.129015	0.152869	0.106471	0.121543	0.0696842	0.0782169	0.100414
98366	Smap1	No_BS	No_BS	No_BS	9.82451	10.5236	7.63619	9.55371	9.19125	6.60079	9.92305	10.5286	5.94305	9.46927	10.2118	6.89811	10.1066	10.0975	5.68926	10.0361	9.92943	5.26746	9.3281	8.44858	8.79824	8.85973	8.6311	8.411
68002	Sdhaf4	No_BS	No_BS	No_BS	16.7768	22.7596	27.1237	16.9402	19.1355	33.922	22.1584	18.8639	35.9452	17.8278	18.3937	23.3298	20.5241	23.6997	26.7737	16.366	18.8629	30.8168	22.22	23.3326	25.6558	19.8504	23.6658	22.0153
68187	Fam135a	No_BS	No_BS	No_BS	6.0028	5.21915	8.05768	6.95499	5.44691	9.1185	5.67588	5.71874	10.3762	6.40431	6.20683	7.9631	6.44603	5.68298	9.97255	7.38973	7.04389	10.2665	6.42654	7.17347	7.25694	6.85808	7.36719	8.23337
12839	Col9a1	No_BS	No_BS	No_BS	0.0333454	0.0190346	0	0.0602713	0.0608034	0.122176	0	0.00877743	0.0114141	0.0390499	0	0.051878	0.00784861	0	0.0335006	0.0502833	0.0164598	0.0678086	0.01746	0.0810835	0.00673052	0.0303093	0.0137831	0.0448505
12823	Col19a1	No_BS	No_BS	No_BS	0	0.0037403	0	0.00296082	0.00398262	0	0	0	0	0.0076733	0.0042166	0.00815521	0.0030845	0	0	0.00790452	0	0	0.00124677	0.00231448	0	0.0066817	0.00102817	0.00263484
68421	Lmbrd1	No_BS	No_BS	No_BS	2.63259	2.9324	4.09994	3.08541	2.96665	4.77824	3.02555	3.48002	4.62188	2.85042	3.20689	3.5556	3.2565	4.68086	4.762	3.50812	3.77514	4.64571	3.22164	3.6101	3.70915	3.2043	4.23312	3.97632
210933	Adgrb3	No_BS	No_BS	No_BS	0.0813088	0.00714056	0.0571916	0.0621773	0.0304127	0.0458325	0.0474317	0.07244	0.0428185	0.0732451	0.128798	0.0233535	0.0353315	0.0320748	0.0418909	0.143359	0.0493972	0.0678332	0.048547	0.0461408	0.0542301	0.0751322	0.0364324	0.0868632
100504323	Gm20172	No_BS	No_BS	No_BS	0.0445358	0.0762673	0.0290883	0.0402489	0.0541389	0.130541	0	0.0468922	0.0304892	0.0260773	0.0286598	0.0277151	0.0419301	0.0285489	0.0298287	0	0.043967	0.0301882	0.0499638	0.0749764	0.0257938	0.0274841	0.0334359	0.0247184
210940	4931408C20Rik	chr1-26 (-421480), chr1-79 (-220597)	No_BS	Merged-chr1-27108951-2 (-421491)	0	0	0	0	0	0	0	0	0	0	0	0	0	0	0	0.00962011	0	0.0108109	0	0	0	0	0	0.00681032
210962	Gm597	No_BS	No_BS	No_BS	0	0	0	0	0	0	0	0	0	0	0	0	0	0	0	0	0	0	0	0	0	0	0	0
102465174	Mir6342	No_BS	No_BS	No_BS	0	0	0	0	0	0	0	0	0	0	0	0	0	0	0	0	0	0	0	0	0	0	0	0
213109	Phf3	No_BS	No_BS	No_BS	23.264	20.7972	24.1542	24.5089	19.3737	21.8242	22.4669	21.9267	21.3522	26.2597	22.1816	21.9507	22.9824	17.0418	19.0968	27.3595	20.2748	19.5808	22.7385	21.9023	21.9153	23.464	19.707	22.405
19243	Ptp4a1	No_BS	No_BS	No_BS	1.0874	1.29874	2.31644	1.04321	1.30154	2.68472	1.25961	1.25943	2.5998	1.25383	1.62561	2.3216	1.16553	1.69439	2.1401	1.0898	1.38731	2.92566	1.56753	1.67649	1.70628	1.73368	1.66667	1.80092
433406	Gm13363	No_BS	No_BS	No_BS	0	0	0	0	0	0	0	0	0	0	0	0	0	0	0	0	0	0	0	0	0	0	0	0
70988	4931428L18Rik	No_BS	No_BS	No_BS	0	0.0360422	0.0412395	0.0570622	0	0.138805	0.0342019	0.0332403	0.0432256	0	0.0406319	0.0392926	0.0297228	0	0.0422891	0	0.0311667	0.0427988	0.0257606	0.0652889	0.0368892	0.0266415	0.024004	0.0246552
266744	Lgsn	No_BS	No_BS	No_BS	0	0	0	0	0	0	0	0	0	0.0212538	0	0	0	0	0	0.0218942	0	0	0	0	0	0.0070846	0	0.00729807
74708	Pih1d3	No_BS	No_BS	No_BS	0	0	0	0	0	0	0	0	0	0	0	0	0	0	0	0	0	0	0	0	0	0	0	0
226957	Gm4850	No_BS	No_BS	No_BS	0.604595	0.215701	0.888499	0.273199	0.275611	0.719942	0.122812	0.0397865	0.413906	0.132755	0.0972677	0.6114	0.0711527	0.0968912	0.759261	0.136755	0.149218	0.768411	0.569599	0.422917	0.192168	0.280474	0.309102	0.351461
170771	Khdrbs2	No_BS	No_BS	No_BS	0.0762417	0.0580282	0.0663959	0.0689029	0.0617877	0	0.0825979	0.0267586	0	0.119046	0	0.0316307	0	0	0.0340429	0.0306584	0.0501787	0	0.0668886	0.0435635	0.0364521	0.0502256	0.0113476	0.0269457
408192	Gm9839	No_BS	No_BS	No_BS	0	0	0.062792	0	0	0	0.0260382	0	0	0	0	0	0	0	0	0	0	0	0.0209307	0	0.00867939	0	0	0
408191	Gm5415	chr1-199 (-908151)	No_BS	No_BS	0	0.0736423	0.0601868	0.0249837	0.0560095	0.0945363	0.0199663	0.00970248	0.0504683	0.0107913	0.0355801	0.0688144	0.0260273	0.0236282	0.0370312	0.0444661	0.0272917	0.024985	0.0446097	0.0585098	0.0267124	0.0383953	0.0288956	0.0322476
19076	Prim2	chr1-199 (+214342)	No_BS	No_BS	20.3799	26.0806	35.3211	22.3514	27.8553	32.9936	24.9004	25.5254	32.3794	25.8518	29.7617	31.4782	25.3749	33.7025	25.2159	25.429	28.3504	30.8512	27.2605	27.7334	27.6017	29.0306	28.0978	28.2102
67503	1700001G17Rik	No_BS	No_BS	No_BS	0.194249	0.13306	0.101498	0.315992	0.188908	0.170813	0.252532	0.0818108	0.106386	0.090992	0.100003	0.29012	0.219461	0.049808	0.156123	0.187468	0.115061	0.052668	0.142936	0.225237	0.14691	0.160372	0.141797	0.118399
19335	Rab23	No_BS	No_BS	No_BS	8.74406	9.61369	10.3766	8.89713	10.3488	9.34059	9.63982	11.3382	10.2967	8.95995	10.402	9.60888	9.31949	10.1743	11.2696	8.78422	9.77223	10.748	9.57811	9.52885	10.4249	9.65695	10.2545	9.76817
213539	Bag2	No_BS	No_BS	No_BS	4.64306	4.54045	2.0383	3.80059	3.40042	1.78486	6.7206	8.19462	2.73572	3.78833	6.29421	2.6289	6.95124	11.637	4.0784	5.57825	8.3973	3.84378	3.7406	2.99529	5.88365	4.23715	7.55556	5.93977
98403	Zfp451	No_BS	No_BS	No_BS	11.6543	10.5859	9.27085	11.5648	10.3485	8.61138	11.3751	10.0829	7.80381	12.0256	10.2213	9.36256	10.8923	9.48842	8.98589	11.3764	10.2337	9.1436	10.5037	10.1749	9.75394	10.5365	9.78888	10.2513
433287	Gm15455	No_BS	No_BS	No_BS	0.503863	0.261473	0.613315	0.403616	0.41762	0.587404	0.161279	0.0964586	0.329265	0.254799	0.147385	0.498844	0.194066	0.0880888	0.260774	0.30392	0.158272	0.248392	0.45955	0.469547	0.195668	0.300343	0.180976	0.236861
320705	Bend6	No_BS	No_BS	No_BS	0.768504	0.584916	0.610208	0.640057	0.80599	0.971713	0.832574	0.698104	1.1554	0.758803	0.698189	0.937742	1.0924	0.560253	1.06981	0.908916	0.833071	1.10313	0.654543	0.80592	0.895359	0.798245	0.90749	0.948373
13518	Dst	No_BS	Merged-chr1-34038761-1 (+26936), Merged-chr1-34075036-2 (+63211)	No_BS	7.89961	4.20575	5.1611	8.67172	4.61117	4.09481	5.13591	6.33213	4.41347	10.7623	4.97987	5.46478	6.87598	2.01021	3.85215	7.62994	4.45625	2.54858	5.75549	5.79257	5.29384	7.06899	4.24612	4.87826
102466987	Mir6896	No_BS	No_BS	No_BS	0	0	0	0	0	0	0	0	0	0	0	0	0	0	0	0	0	0	0	0	0	0	0	0
100628580	Mir5103	No_BS	No_BS	No_BS	0.437183	0.499116	0	0.395101	0	0	0	0	0	0	0	0	0	0	0	0	0	0	0.3121	0.1317	0	0	0	0
69668	Ccdc115	No_BS	Merged-chr1-34075036-2 (+364636), Merged-chr1-34038761-1 (+400911)	No_BS	18.0891	20.6055	29.0013	15.6523	17.1386	24.9376	19.0486	19.0036	25.7661	16.9612	14.3652	22.9931	18.6137	21.3476	27.8943	14.882	14.1785	25.8138	22.5653	19.2428	21.2728	18.1065	22.6185	18.2914
27993	Imp4	No_BS	No_BS	No_BS	30.944	36.2218	45.1361	26.7996	31.1759	35.583	35.986	39.5341	37.6166	30.0872	32.3157	36.3155	35.047	43.6886	36.9045	25.8065	29.8059	29.7919	37.434	31.1862	37.7122	32.9061	38.5467	28.4681
19253	Ptpn18	No_BS	No_BS	No_BS	1.16369	0.852274	1.23331	0.892934	0.800726	0.90101	1.35585	1.41021	1.68352	1.13136	1.44121	1.3937	1.57106	1.80157	2.64704	1.29788	1.77744	2.11338	1.08309	0.86489	1.48319	1.32209	2.00656	1.72957
21755	Prss39	No_BS	No_BS	No_BS	0.0277187	0.0316454	0.108626	0.0501011	0.134782	0.0406239	0.0300296	0.116741	0	0.0324606	0.0356752	0.0689985	0	0	0.0371303	0.133755	0.0273647	0.0375777	0.0559967	0.0751692	0.0489236	0.0457115	0.0123768	0.0662325
12627	Cfc1	chr1-200 (+1462)	No_BS	No_BS	0.465823	0.34188	0.565037	0.210492	0.444925	0.633937	0.036047	0.245235	0.774479	0.506549	0.342592	0.662599	0.313264	0.25595	0.66856	0.160558	0.0656964	0.225539	0.45758	0.429785	0.351921	0.503913	0.412591	0.150598
21756	Prss40	chr1-200 (+23810)	No_BS	No_BS	0.0265469	0	0.034678	0.0239915	0.0645423	0.0778131	0.0287601	0	0.036348	0	0.0341671	0.0660816	0	0	0	0.0320251	0	0	0.0204083	0.055449	0.0217027	0.0334162	0	0.010675
211383	Amer3	No_BS	No_BS	No_BS	0.0237861	0.00905193	0.0103572	0.014331	0.0289151	0.0116202	0.00858972	0	0	0.0185702	0	0.00986825	0	0	0	0.0191298	0.00782746	0.0107488	0.0143984	0.0182888	0.00286324	0.00947949	0	0.0125687
241051	AA619741	No_BS	No_BS	No_BS	0.0387192	0	0.0168595	0.0349922	0.0156894	0.0189153	0.0139824	0.0135893	0.0176714	0	0	0	0.0121513	0	0.0172886	0	0	0.0349939	0.0185262	0.023199	0.015081	0	0.00981329	0.0116646
226970	Arhgef4	No_BS	No_BS	No_BS	1.29802	0.973406	0.814549	1.01206	0.912712	0.820622	1.04778	1.2997	1.16741	1.1177	1.03185	1.04535	0.886603	0.913648	1.27849	1.22814	1.34426	1.00061	1.02866	0.915133	1.17163	1.06497	1.02625	1.191
214469	Fam168b	No_BS	No_BS	No_BS	19.927	19.001	16.0482	23.2561	18.7361	15.1055	20.6087	18.7694	12.7345	24.7532	21.5169	17.9222	20.8479	17.3195	13.9704	25.089	19.5987	13.4382	18.3254	19.0326	17.3709	21.3974	17.3792	19.3753
226971	Plekhb2	No_BS	Merged-chr1-34859955-1 (+9963), Merged-chr1-34902649-2 (+52657)	Merged-chr1-34859957-2 (+9965), Merged-chr1-35767546-2 (+917554)	2.97443	3.38138	2.52432	3.03055	3.40852	2.78586	2.65455	2.57992	2.44702	2.92862	2.58466	2.82958	2.76473	3.56242	2.11484	2.52929	2.94268	1.95198	2.96004	3.07498	2.56049	2.78095	2.814	2.47465
50785	Hs6st1	chr1-11 (-72395), chr1-201 (-37829), chr1-40 (-7066)	Merged-chr1-35995991-2 (-72409), Merged-chr1-36061404-2 (-6996), Merged-chr1-36068696-1 (+296)	Merged-chr1-35767546-2 (-300854), Merged-chr1-35995956-2 (-72444), Merged-chr1-36061324-2 (-7076)	16.4933	18.5117	14.4362	22.7362	23.9445	18.6464	19.0857	18.1091	13.1351	23.0887	23.1639	20.7475	19.594	17.8832	14.9529	26.574	24.534	17.9658	16.4804	21.7757	16.7766	22.3334	17.4767	23.0246
320011	Uggt1	chr1-27 (-7299)	Merged-chr1-36251592-2 (-7287), Merged-chr1-36244290-2 (+15)	Merged-chr1-36251642-2 (-7337)	12.3285	11.5945	11.4676	14.8823	13.192	11.4701	10.3478	12.1471	9.39596	13.367	13.332	11.9451	10.7537	10.7744	9.42811	14.2959	14.3916	11.3671	11.7969	13.1815	10.6303	12.8813	10.3187	13.3515
102465540	Mir6897	No_BS	No_BS	No_BS	0	0	0	0	0	0	0	0	0	0	0	0	0	0	0	0	0	0	0	0	0	0	0	0
214854	Neurl3	chr1-27 (+21821)	Merged-chr1-36251592-2 (+21833)	Merged-chr1-36251642-2 (+21783)	0.173824	0.137387	0.122266	0.205428	0.243814	0.137175	0.115886	0.183021	0.0915385	0.140927	0.120464	0.0832096	0.151065	0.188568	0.143289	0.177434	0.250806	0.253777	0.144492	0.195472	0.130149	0.114867	0.160974	0.227339
214855	Arid5a	No_BS	No_BS	No_BS	0.971628	1.10927	0.646294	1.26059	1.75359	0.995925	0.884727	0.997932	0.448893	1.17275	1.35794	0.986736	0.869883	1.19219	0.630805	6.9609	6.80281	4.07287	0.909065	1.3367	0.777184	1.17247	0.897627	5.94552
226976	Kansl3	No_BS	No_BS	No_BS	11.7026	12.0328	11.1169	12.35	11.1737	10.0953	12.2209	12.7351	10.05	12.5857	12.3831	11.9472	11.3875	10.8538	11.3602	13.9657	13.3007	10.5231	11.6175	11.2063	11.6687	12.3053	11.2005	12.5965
102465541	Mir6898	No_BS	No_BS	No_BS	0	0	0	0.405364	0	0	0	0	0	0	0	0	0	0	0	0	0	0	0	0.135121	0	0	0	0
100534273	Fer1l5	No_BS	No_BS	No_BS	0.442788	0.461829	0.378466	0.568138	0.558202	0.448651	0.307957	0.264765	0.269452	0.448119	0.246248	0.285757	0.370562	0.168202	0.219679	0.323136	0.501894	0.318667	0.427694	0.524997	0.280725	0.326708	0.252814	0.381232
214895	Lman2l	No_BS	No_BS	No_BS	4.9051	5.13922	3.5079	6.57928	6.67982	3.57166	5.54946	4.80507	3.48556	6.54407	6.01342	3.22637	5.115	6.01004	2.84863	6.16076	6.16034	3.93514	4.5174	5.61025	4.61336	5.26129	4.65789	5.41875
94220	Cnnm4	No_BS	No_BS	No_BS	1.94471	1.68667	0.955097	1.89376	1.64933	1.21517	2.03335	1.63491	1.01141	1.90666	1.76564	1.06011	1.9019	1.32393	1.05009	2.44605	1.91988	1.05252	1.52883	1.58609	1.55989	1.57747	1.42531	1.80615
94218	Cnnm3	No_BS	Merged-chr1-36512724-2 (+857)	No_BS	4.89003	3.34369	3.96249	6.04999	3.83052	3.95703	4.80902	4.50173	3.96535	5.74956	4.65296	5.45158	4.48698	3.2101	5.07918	5.74142	4.85985	5.00745	4.0654	4.61252	4.42536	5.2847	4.25875	5.20291
78321	Ankrd23	No_BS	No_BS	No_BS	0.795387	0.645735	0.531048	1.13415	0.558651	0.725327	0.746805	1.0608	1.21005	0.786564	0.705216	0.769966	0.665645	0.589182	1.11281	0.895557	0.994624	1.1981	0.65739	0.806041	1.00588	0.753915	0.789211	1.02943
109346	Ankrd39	No_BS	No_BS	No_BS	3.13274	4.3934	3.2334	3.77492	4.34892	2.94749	4.00146	3.97041	2.62127	3.07987	3.65865	2.71972	3.31358	4.46264	3.78197	2.86941	4.62001	4.48294	3.58651	3.69044	3.53105	3.15275	3.85273	3.99078
20353	Sema4c	chr1-1 (-22720)	Merged-chr1-36580222-2 (-22696)	Merged-chr1-36580245-2 (-22719)	1.31165	0.615523	0.409955	3.0253	1.53579	1.09679	1.34254	1.94025	0.848378	1.95068	2.04029	1.38213	1.40916	2.68234	0.840778	3.98009	4.11508	1.93091	0.779043	1.88596	1.37706	1.79103	1.64409	3.34203
381337	Fam178b	chr1-1 (+102937)	Merged-chr1-36580222-2 (+102961)	Merged-chr1-36580245-2 (+102938)	3.46854	3.66828	3.21379	3.76646	4.42891	2.75844	4.5879	3.87854	2.74271	3.41642	3.4779	3.68118	3.0884	2.63711	2.84537	4.13566	3.86223	2.44224	3.4502	3.65127	3.73638	3.52516	2.85696	3.48004
12859	Cox5b	No_BS	No_BS	No_BS	221.368	276.219	183.477	216.022	258.475	179.074	265.403	234.678	175.525	249.286	247.412	191.662	244.019	284.275	178.553	209.934	215.245	185.395	227.021	217.857	225.202	229.453	235.615	203.525
226977	Actr1b	No_BS	No_BS	No_BS	53.5605	51.8649	42.5311	50.569	50.0704	40.9667	54.3688	56.4645	41.483	45.509	52.049	41.496	54.4503	60.3964	48.8036	49.3878	54.7808	43.9138	49.3188	47.202	50.7721	46.3513	54.5501	49.3608
71166	4933424G06Rik	No_BS	No_BS	No_BS	0.061291	0.0349869	0.040032	0.0276957	0	0	0.0664008	0.096801	0.0419599	0.0358882	0.0394422	0.0381421	0	0.078579	0	0.0369696	0.0302541	0.0415456	0.0454366	0.00923188	0.0683872	0.0378241	0.026193	0.0362564
22637	Zap70	No_BS	No_BS	No_BS	1.0789	0.95641	0.829034	0.539144	0.802354	0.781306	0.921326	0.775143	0.990614	0.416202	0.375737	0.916278	0.932124	1.00894	1.02016	0.689052	0.488703	0.688303	0.954781	0.707601	0.895694	0.569406	0.987074	0.62202
56030	Tmem131	No_BS	No_BS	No_BS	33.5301	25.2189	18.548	32.7241	24.9869	14.0071	34.8569	34.7432	17.513	37.2958	29.0549	20.0422	33.5	19.7255	21.6767	31.5858	26.2597	13.6647	25.7657	23.9061	29.0377	28.7976	24.9674	23.8367
12790	Cnga3	No_BS	No_BS	No_BS	1.03649	0.926075	0.788824	0.847117	0.799814	0.673666	1.29865	1.66071	0.863835	0.854938	0.974403	0.605754	1.06918	1.61772	0.700243	0.511023	1.06774	0.281029	0.917128	0.773532	1.2744	0.811698	1.12905	0.61993
269180	Inpp4a	No_BS	No_BS	No_BS	1.30749	1.22234	1.00544	1.37337	1.32552	0.737568	1.15992	1.29355	0.891731	1.34627	1.00968	0.718482	1.08234	0.797027	0.73362	1.29756	1.13005	0.729083	1.17842	1.14549	1.11507	1.02481	0.870997	1.05223
76178	Coa5	No_BS	No_BS	No_BS	27.3563	28.9856	26.1444	26.1051	24.906	23.3821	26.5173	25.9413	22.175	25.606	25.8053	24.9769	27.3303	27.15	22.2577	23.1087	23.2901	20.9619	27.4954	24.7977	24.8779	25.4627	25.5793	22.4536
67387	Unc50	chr1-165 (+62906)	No_BS	No_BS	17.6846	26.9198	32.3992	17.2644	23.9063	36.0631	23.7433	22.7152	35.768	19.0199	21.3757	24.8114	21.4629	27.1258	33.6825	18.9734	20.9601	36.4096	25.6678	25.7446	27.4088	21.7357	27.4237	25.4477
269181	Mgat4a	chr1-203 (-6027), chr1-165 (+47940)	Merged-chr1-37547063-2 (-6047)	No_BS	2.05291	2.19147	2.27105	3.10365	2.53611	2.22686	1.8164	1.94588	1.94346	3.38584	2.50732	2.41875	1.68615	1.69154	1.64614	2.4823	2.09723	1.97593	2.17181	2.62221	1.90192	2.77064	1.67461	2.18515
77633	4930594C11Rik	No_BS	No_BS	No_BS	0.0752178	0.0858734	0.0327521	0.0906367	0.0152395	0.0367459	0.0135814	0.0131996	0.0171647	0.0293619	0.0645392	0.0156029	0.0472113	0.0321447	0.0671714	0.0151233	0.0247524	0.0339904	0.0646144	0.0475407	0.0146486	0.0365013	0.0488425	0.024622
72097	2010300C02Rik	chr1-203 (+173042)	Merged-chr1-37547063-2 (+173022)	No_BS	0.285106	0.11754	0.144835	0.214719	0.14441	0.116068	0.231657	0.275176	0.140966	0.148392	0.142701	0.137997	0.290794	0.182763	0.201564	0.248402	0.265828	0.203993	0.182494	0.158399	0.215933	0.14303	0.22504	0.239408
211484	Tsga10	No_BS	No_BS	No_BS	0.569844	0.405428	0.496255	0.425428	0.261024	0.472042	0.375779	0.313041	0.644539	0.444886	0.318876	0.483105	0.412097	0.338818	0.586325	0.468255	0.41581	0.582194	0.490509	0.386165	0.444453	0.415623	0.445747	0.488753
623661	Lipt1	No_BS	No_BS	No_BS	4.95296	6.1364	6.99226	3.73352	5.10297	5.85925	4.54777	4.72393	6.56873	2.91315	3.71619	5.91577	3.91038	5.80899	6.12891	2.7062	3.94685	5.54033	6.02721	4.89858	5.28014	4.1817	5.28276	4.06446
69028	Mitd1	No_BS	No_BS	No_BS	12.5054	22.8432	19.6396	14.4509	19.7113	17.0921	16.5012	16.2148	19.1618	17.837	19.0609	15.7744	16.5362	21.365	18.4079	14.3064	16.8956	21.7537	18.3294	17.0848	17.2926	17.5574	18.7697	17.6519
107734	Mrpl30	No_BS	No_BS	No_BS	60.3281	87.9904	122.551	53.7984	82.0859	113.468	73.3717	80.6764	115.793	61.8689	78.6744	92.3175	72.2334	92.8519	98.1527	61.6831	73.6206	101.029	90.2899	83.1174	89.9468	77.6202	87.746	78.7777
332427	Lyg2	No_BS	No_BS	No_BS	0	0	0	0	0	0	0.0145931	0	0	0	0	0	0	0	0	0	0	0	0	0	0.00486438	0	0	0
69541	Lyg1	No_BS	No_BS	No_BS	0	0	0.0565364	0	0	0	0	0	0	0	0	0	0	0	0	0	0	0	0.0188455	0	0	0	0	0
98258	Txndc9	No_BS	No_BS	No_BS	13.564	19.921	30.2933	14.0241	18.6538	28.9321	17.4221	17.7314	27.3176	17.7325	20.0592	24.2989	17.9776	22.5539	24.8233	16.4447	17.4637	26.8441	21.2594	20.5367	20.8237	20.6969	21.7849	20.2508
226982	Eif5b	No_BS	No_BS	No_BS	27.1844	19.2321	32.4729	25.016	19.6004	27.5062	28.6157	22.928	31.3439	27.3012	23.3687	29.4844	28.4881	19.9561	27.4014	28.7971	21.6202	29.7253	26.2965	24.0409	27.6292	26.7181	25.2819	26.7142
56210	Rev1	No_BS	No_BS	No_BS	9.81344	10.9816	12.9674	9.82821	9.61452	9.70306	10.6404	13.2081	14.768	10.3155	11.4518	11.5685	10.6431	12.7685	15.8158	9.80518	11.4881	12.0295	11.2542	9.71527	12.8722	11.1119	13.0758	11.1076
16764	Aff3	chr1-204 (-169918), chr1-93 (-132168)	No_BS	No_BS	1.10505	0.532914	0.292436	1.33875	0.689034	0.446768	1.32102	1.10835	0.449997	1.52837	0.993121	0.515762	1.22874	0.769437	0.47215	1.29286	1.05332	0.497212	0.643466	0.824849	0.959788	1.01242	0.823443	0.947797
381338	Lonrf2	chr1-204 (+1217), chr1-93 (+38967)	No_BS	No_BS	0.64626	0.67568	1.04859	0.245917	0.41348	0.578257	0.420083	0.179067	0.326001	0.15933	0.122576	0.177803	0.345855	0.104659	0.437402	0.147718	0.0604427	0.11989	0.790177	0.412551	0.308384	0.153237	0.295972	0.10935
98388	Chst10	chr1-205 (-6211)	No_BS	No_BS	2.84583	3.57767	2.9653	2.82208	3.56715	3.19706	2.53124	2.92645	3.3507	2.04888	1.9525	2.46698	2.49167	2.64057	2.75895	2.07054	1.73816	2.11667	3.1296	3.19543	2.93613	2.15612	2.6304	1.97512
433292	Nms	chr1-205 (-34778)	Merged-chr1-38934867-2 (-4282)	No_BS	0	0	0	0.0311818	0.0419428	0.101134	0	0	0	0	0	0	0	0	0	0	0	0	0	0.0580861	0	0	0	0
68833	Pdcl3	chr1-166 (+134943)	No_BS	No_BS	37.9184	43.8447	47.311	32.0912	37.1858	41.4493	37.1756	39.2639	46.8453	31.1287	38.6669	38.1987	43.6289	45.5251	48.4609	35.4126	36.9145	48.4411	43.0247	36.9088	41.0949	35.9981	45.8717	40.256
102466631	Mir6349	No_BS	No_BS	No_BS	0	0	0	0	0	0	0	0	0	0	0	0	0	0	0	0	0	0	0	0	0	0	0	0
18143	Npas2	chr1-166 (-71455), chr1-94 (-1772)	Merged-chr1-39192482-2 (-1730), Merged-chr1-39336040-2 (+141828)	No_BS	0.0413128	0.00943306	0.0431732	0.0448033	0.0301326	0.121094	0.0268542	0.113097	0.0565655	0.0580564	0.0744401	0.0205675	0.0311165	0.0741519	0.011068	0.0299029	0.0570993	0.056007	0.0313064	0.0653434	0.0655054	0.0510213	0.0387788	0.0476697
114641	Rpl31	chr1-102 (+62437)	Merged-chr1-39336040-2 (-31811)	No_BS	753.292	550.386	679.261	664.615	460.525	946.461	626.53	376.187	813.571	438.998	393.18	634.911	580.008	406.323	834.161	451.961	365.482	764.283	660.98	690.534	605.429	489.03	606.831	527.242
54610	Tbc1d8	chr1-15 (+659), chr1-102 (+48459)	Merged-chr1-39478096-2 (+651)	Merged-chr1-39478142-2 (+605)	2.31858	1.98084	2.03271	4.10642	4.07646	3.09018	1.7954	2.22826	1.86428	4.1184	4.09565	3.86381	1.52365	1.75561	1.92811	2.27143	2.81896	2.39436	2.11071	3.75769	1.96265	4.02595	1.73579	2.49492
52846	Cnot11	No_BS	No_BS	No_BS	24.4904	24.9833	30.6094	22.0246	22.7031	30.5687	21.3439	18.4581	25.9446	22.0498	20.9901	28.0509	21.6915	19.1327	24.8126	20.0822	17.0159	27.7145	26.6943	25.0988	21.9155	23.697	21.879	21.6042
100217461	Snord89	No_BS	No_BS	No_BS	3.30678	2.09735	2.39979	4.31669	1.33994	1.61545	0.796103	0.773721	3.01843	1.29083	0.945773	3.20109	1.38369	0.942113	4.92174	0.886483	3.62728	1.99242	2.60131	2.42403	1.52942	1.81256	2.41585	2.16873
67702	Rnf149	No_BS	No_BS	No_BS	16.9424	19.1805	20.8527	17.0299	18.3187	22.9172	17.4325	15.8517	22.3233	18.445	17.7513	22.9589	18.6764	17.6462	22.4669	19.3602	17.3844	25.9501	18.9919	19.4219	18.5358	19.7184	19.5965	20.8983
263764	Creg2	No_BS	No_BS	No_BS	0.0238231	0.013599	0.0155599	0.0322949	0.05792	0.0261859	0.0645229	0.0125418	0.00815465	0.0209239	0.0153307	0.022238	0.0392512	0.00763568	0.023934	0.0646633	0.0235188	0.0726671	0.0176607	0.0388003	0.0284064	0.0194975	0.0236069	0.0536164
619289	Rfx8	No_BS	No_BS	No_BS	0.069075	0.0197151	0.045116	0.124852	0.0419847	0.0506174	0.0748337	0.0727298	0.0709332	0.0606689	0.111128	0.128958	0.0650335	0.0664189	0.0462643	0.249988	0.0681928	0.140466	0.0446354	0.0724847	0.0728322	0.100252	0.0592389	0.152882
100042065	Gm3646	No_BS	No_BS	No_BS	0	0	0	0	0	0	0	0	0	0	0	0	0	0	0	0	0	0	0	0	0	0	0	0
73426	1700066B17Rik	No_BS	No_BS	No_BS	0.130085	0	0.0849643	0.117563	0.0790673	0	0	0.0684838	0	0	0	0.0809531	0.0612369	0.0833885	0.0871268	0	0	0.0881767	0.071683	0.0655435	0.0228279	0.0269844	0.0772507	0.0293922
26921	Map4k4	No_BS	Merged-chr1-39956646-2 (+55733)	No_BS	36.48	34.447	33.5991	26.9234	23.6981	22.8177	30.1201	28.6037	27.8398	24.6575	19.4875	24.0115	31.733	22.1322	27.3838	28.8389	21.3003	20.2132	34.842	24.4797	28.8545	22.7188	27.083	23.4508
100047133	Gm16894	No_BS	No_BS	No_BS	0	0	0	0	0	0	0	0	0	0.0471398	0	0	0	0	0	0.0485603	0	0	0	0	0	0.0157133	0	0.0161868
16178	Il1r2	No_BS	Merged-chr1-39956646-2 (-128122)	No_BS	0	0.0586759	0.335685	0.11612	0.218671	0.41428	0.1392	0.1894	0.562962	0.150469	0.231517	0.127935	0.0967761	0.0658918	0.309806	0.0930016	0.0507387	0.209026	0.131454	0.24969	0.297187	0.169974	0.157491	0.117589
16177	Il1r1	No_BS	No_BS	No_BS	0.281239	0.313249	0.304656	0.229371	0.200126	0.402125	0.208078	0.339454	0.450817	0.321318	0.326653	0.332961	0.271242	0.360566	0.385919	0.422026	0.297963	0.418467	0.299715	0.277207	0.332783	0.326978	0.339242	0.379485
107527	Il1rl2	No_BS	No_BS	No_BS	0.106269	0.202206	0.0694093	0.112047	0.129184	0.155746	0.115129	0.111892	0.0242507	0.207415	0.113978	0.0881766	0.116727	0.113537	0.118626	0.042733	0.104912	0.0720336	0.125962	0.132325	0.0837571	0.136523	0.116297	0.0732262
17082	Il1rl1	No_BS	No_BS	No_BS	0.0486718	0.161144	0.00635795	0.0307907	0.165667	0.0213997	0.548387	0.122993	0.0399849	0.854974	0.194193	0.0181734	0.77901	0.287042	0.0260791	1.0334	0.225836	0.0131967	0.0720578	0.0726191	0.237121	0.35578	0.364043	0.424143
16182	Il18r1	No_BS	No_BS	No_BS	0.0361195	0.00824727	0.00943652	0.0195857	0.0526895	0.0211744	0.0313046	0.0380306	0.0296729	0.0253792	0.0092975	0.0179821	0.0476087	0.018523	0.0193534	0.00871464	0.0427899	0.0195866	0.0179344	0.0311498	0.0330027	0.0175529	0.0284951	0.0236971
16174	Il18rap	No_BS	No_BS	No_BS	0.021193	0.0241953	0.0276842	0.0127687	0	0.0414133	0.0535729	0.0297524	0.0580349	0.0910013	0.00909211	0.0263772	0.0665101	0.0362277	0.0283888	0.0937434	0.0139482	0.019154	0.0243575	0.0180607	0.0471201	0.0421569	0.0437089	0.0422819
110895	Slc9a4	No_BS	No_BS	No_BS	0	0	0	0	0.0329551	0	0	0	0	0.0105824	0	0.011247	0.00850779	0.0115854	0	0	0	0	0	0.010985	0	0.00727647	0.00669772	0
226999	Slc9a2	No_BS	No_BS	No_BS	0.0296629	0.0225767	0.0645806	0.00893587	0.0240394	0.0144911	0.0214239	0.0104108	0	0.0347374	0.0254517	0.0123064	0.0186183	0.0380297	0.0397346	0.0477122	0.0292841	0.0536179	0.0389401	0.0158221	0.0106116	0.0241652	0.0321275	0.0435381
211798	Mfsd9	No_BS	No_BS	No_BS	0.734141	0.625479	0.858808	0.772403	0.546121	0.69053	0.783474	0.819133	1.15521	0.692919	0.930771	1.00919	0.887196	1.01146	0.836633	0.872421	0.973565	0.713023	0.739476	0.669685	0.919274	0.877627	0.911762	0.853003
381339	Tmem182	No_BS	No_BS	No_BS	0.0315123	0	0	0	0	0	0	0	0	0	0	0	0	0	0	0	0	0	0.0105041	0	0	0	0	0
74897	4930448I06Rik	No_BS	No_BS	No_BS	0	0	0	0	0	0	0	0	0.0825284	0	0	0	0	0	0	0	0	0	0	0	0.0275095	0	0	0
66297	Pantr1	No_BS	No_BS	No_BS	0.0632555	0.0722165	0.16526	0	0	0	0.068529	0	0	0.0740769	0	0.0787291	0	0.0810976	0	0	0	0	0.100244	0	0.022843	0.0509353	0.0270325	0
18993	Pou3f3	No_BS	No_BS	Merged-chr1-42763672-2 (+66526)	0.0789042	0.0514755	0.0441737	0.0611221	0.068513	0.0495602	0.0610588	0.0356053	0.108036	0.0264008	0.0290152	0.0561176	0.0318376	0.10116	0.0754966	0.095187	0.0333842	0.0152813	0.0581844	0.0597317	0.0682333	0.0371779	0.0694982	0.0479508
73100	2900092D14Rik	No_BS	No_BS	No_BS	0	0.027758	0	0.0329599	0.0147782	0.0178168	0	0.0128	0.0166451	0.0142365	0.0156464	0.0151306	0.0228911	0	0	0	0.0120016	0.0164808	0.00925266	0.0218516	0.00981505	0.0150045	0.00763036	0.0094941
66620	Pantr2	No_BS	No_BS	No_BS	0	0	0	0	0	0	0	0	0	0	0	0	0	0	0	0	0	0	0	0	0	0	0	0
104940697	Dalir	No_BS	No_BS	No_BS	0	0	0	0	0	0	0	0.0167195	0	0	0	0	0	0	0.021271	0	0	0	0	0	0.00557316	0	0.00709032	0
69527	Mrps9	No_BS	Merged-chr1-42851093-1 (-140)	Merged-chr1-42763672-2 (-87561)	45.8309	66.106	59.3916	42.9371	57.6661	56.1821	46.8831	47.7946	54.2538	40.2464	48.6177	49.1356	46.9992	53.2974	51.7417	35.9685	43.5156	51.8373	57.1095	52.2618	49.6438	45.9999	50.6795	43.7738
93690	Gpr45	No_BS	No_BS	No_BS	0.00894753	0	0.0233762	0	0	0	0.00969348	0	0.012251	0	0	0	0	0.0114713	0	0	0	0	0.0107746	0	0.00731482	0	0.00382377	0
73122	Tgfbrap1	No_BS	No_BS	No_BS	2.00814	2.02206	1.29531	2.12483	1.774	0.959702	2.385	2.92206	1.03321	2.59269	2.49627	1.31954	2.28991	2.79844	1.37005	2.73853	2.51198	1.0991	1.77517	1.61951	2.11343	2.13617	2.1528	2.11654
98404	AI597479	chr1-24 (+37928)	Merged-chr1-43136712-2 (+38002)	Merged-chr1-43136725-2 (+38015)	11.699	11.5656	10.9756	10.6451	11.149	8.82913	9.9035	11.0767	10.8065	10.0852	10.9039	9.67405	10.0269	13.8205	9.23413	10.4734	10.8592	8.74947	11.4134	10.2077	10.5956	10.221	11.0272	10.0274
14200	Fhl2	chr1-24 (+27323)	Merged-chr1-43136712-2 (+27249)	Merged-chr1-43136725-2 (+27236)	1.1945	1.66938	0.807085	1.02368	1.20171	0.935683	1.49489	3.70805	1.40992	1.85709	3.94946	2.12752	3.87797	4.99033	1.40697	1.93789	3.55806	1.06096	1.22365	1.05369	2.20429	2.64469	3.42509	2.18564
17974	Nck2	No_BS	No_BS	No_BS	5.526	4.63216	2.87767	5.41025	4.6448	2.59015	5.51477	4.9797	3.05034	5.72802	5.06185	3.7487	5.48391	6.65386	3.86786	6.98165	6.10664	4.64	4.34528	4.21507	4.51494	4.84619	5.33521	5.90943
78896	1500015O10Rik	No_BS	No_BS	No_BS	0.505616	0.355227	0.203225	0.246048	0.330961	0.171005	0.168544	0.204757	0.532531	0.273284	0.45052	0.338854	0.36618	0.349048	0.729393	0.656876	0.345572	0.949091	0.35469	0.249338	0.301944	0.354219	0.48154	0.650513
67883	Uxs1	No_BS	No_BS	No_BS	20.2357	22.9775	22.9688	15.6189	19.6128	23.3249	17.2123	19.0894	21.9782	14.1865	17.4567	19.1957	17.6873	23.3842	20.0369	13.5913	16.5218	19.1662	22.0607	19.5189	19.4267	16.9463	20.3695	16.4264
22019	Tpp2	No_BS	No_BS	No_BS	24.694	25.6648	28.4923	25.5666	25.1692	29.2447	24.4348	24.5614	32.3159	26.413	26.9921	29.7916	27.1241	23.0111	29.2075	29.0461	25.2514	31.0501	26.2837	26.6601	27.104	27.7322	26.4476	28.4492
433294	Mettl21c	No_BS	No_BS	No_BS	0.0318025	0	0.0415433	0.0287413	0	0.0466091	0	0	0.043544	0	0.0409313	0	0	0	0.0426007	0	0	0	0.0244486	0.0251168	0.0145147	0.0136438	0.0142002	0
75623	Tex30	No_BS	No_BS	No_BS	31.152	21.7567	41.9775	26.1548	18.3538	51.5378	25.1417	20.2953	54.5036	19.2158	21.3648	39.2822	25.8592	22.6822	57.6384	20.223	20.0805	59.0732	31.6288	32.0154	33.3136	26.6209	35.3933	33.1256
72050	Kdelc1	No_BS	No_BS	No_BS	11.2054	10.9773	13.7445	11.3355	10.2252	12.6544	11.9302	13.629	13.5925	10.8424	13.0638	11.061	12.6065	14.9757	14.1739	10.5775	12.7788	13.0956	11.9757	11.405	13.0506	11.6557	13.9187	12.1507
246229	Bivm	No_BS	No_BS	No_BS	6.41231	7.38695	6.9866	6.18841	6.87793	7.85272	6.53825	6.95526	8.21032	6.30871	7.05794	6.96974	6.55617	8.74178	7.73447	6.10211	6.76963	8.01124	6.92862	6.97302	7.23461	6.7788	7.67747	6.961
22592	Ercc5	No_BS	No_BS	Merged-chr1-44157185-1 (+9338)	7.50178	7.56155	9.02321	7.65147	6.69034	7.68729	8.41646	11.3176	12.3824	7.92781	9.76599	9.1868	9.33337	10.468	13.0025	9.07064	10.9432	11.5128	8.02885	7.34303	10.7055	8.9602	10.9346	10.5089
403183	Mettl21e	chr1-207 (-113039)	No_BS	Merged-chr1-44157185-1 (+61776)	0.0108574	0	0.014183	0.00981232	0.0131986	0.0477373	0.0352878	0.0228638	0.014866	0.0508594	0	0.0540536	0.0102222	0.0417598	0.0581758	0	0.0321563	0.0294384	0.0083468	0.0235827	0.0243392	0.034971	0.0367193	0.0205316
70676	Gulp1	chr1-207 (-219511)	No_BS	No_BS	2.28625	1.29844	1.2886	3.93309	2.38421	3.19761	1.92365	1.24638	2.52652	2.93559	2.61391	2.75885	2.40379	1.36885	2.72052	2.73005	1.8446	3.74449	1.62443	3.17164	1.89885	2.76945	2.16439	2.77304
75066	4930521E06Rik	No_BS	No_BS	No_BS	0	0	0	0	0	0	0.0412989	0	0	0.0892847	0	0	0.0358905	0.0488734	0	0	0.037634	0	0	0	0.0137663	0.0297616	0.0282546	0.0125447
12825	Col3a1	No_BS	No_BS	No_BS	0.0931097	0.14882	0.154063	0.089757	0.0754578	0.0909731	0.161395	0.0718932	0.0934897	0.130846	0.0639128	0.0540803	0.233765	0.127331	0.0582046	0.269578	0.183841	0.058906	0.131997	0.085396	0.108926	0.0829464	0.139767	0.170775
12832	Col5a2	No_BS	No_BS	No_BS	0.302823	0.214586	0.361474	0.443541	0.336386	0.390248	0.593918	0.280364	0.39318	0.862113	0.423346	0.324914	0.815992	0.394932	0.36368	1.00146	0.396889	0.431766	0.292961	0.390058	0.422487	0.536791	0.524868	0.61004
73674	Wdr75	No_BS	No_BS	Merged-chr1-45915507-2 (+120341)	79.0316	100.659	117.195	76.6463	93.4691	126.04	80.1912	81.4033	126.315	75.3639	85.3119	105.128	86.8068	87.6093	107.017	65.1131	71.9131	105.869	98.9616	98.7184	95.9697	88.6014	93.8111	80.9651
53945	Slc40a1	No_BS	No_BS	Merged-chr1-45915507-2 (+10087)	1.72687	1.69153	1.56171	4.42338	4.76986	3.71394	1.32841	2.17329	3.036	4.90617	7.82502	6.67683	1.59698	2.24017	2.6691	3.15567	3.6921	4.5021	1.66004	4.3024	2.17923	6.46934	2.16875	3.78329
212225	Stk-ps2	No_BS	No_BS	No_BS	0	0	0	0	0	0	0	0	0	0	0	0	0	0	0	0	0	0	0	0	0	0	0	0
227058	Dnah7b	No_BS	No_BS	No_BS	0.0560764	0.0448143	0.102553	0.078552	0.0409009	0.102731	0.0394885	0.0324739	0.122848	0.0689532	0.0252605	0.0942218	0.0448762	0.0323521	0.0713608	0.0541188	0.0359842	0.083624	0.0678146	0.0740612	0.0649368	0.0628119	0.0495297	0.057909
227059	Slc39a10	chr1-104 (-222612), chr1-103 (+4118)	Merged-chr1-47076582-2 (-222536), Merged-chr1-46849905-1 (+4141)	No_BS	21.9714	15.5702	19.6342	25.6386	18.6439	24.2833	19.1723	17.5044	27.3286	23.9447	21.0922	25.7778	19.3357	16.2087	22.8944	18.4094	16.7836	19.7631	19.0586	22.8553	21.3351	23.6049	19.4796	18.3187
102466969	Mir6350	No_BS	No_BS	No_BS	0	0	0	0	0	0	0	0	0	0	0	0	0	0	0	0	0	0	0	0	0	0	0	0
56363	Tmeff2	No_BS	No_BS	No_BS	0.299966	0.224371	0.081071	0.383268	0.289203	0.0757973	0.246532	0.326729	0.198276	0.399735	0.359445	0.231731	0.19477	0.265225	0.304826	0.586475	0.398251	0.46275	0.201803	0.249423	0.257179	0.330304	0.25494	0.482492
442821	9330175M20Rik	No_BS	No_BS	No_BS	0	0	0	0	0	0	0	0	0	0	0.0174182	0	0	0	0	0	0	0	0	0	0	0.00580608	0	0
20324	Sdpr	No_BS	No_BS	No_BS	0.169578	0.529178	0	0.112387	0.659662	0.0165687	1.06555	0.499943	0.0309583	1.46956	0.902122	0.0281415	1.64979	1.31896	0.0302876	1.30927	0.970994	0.0306526	0.232919	0.262873	0.532151	0.799941	0.999678	0.770305
109019	Nabp1	chr1-208 (-56859)	No_BS	No_BS	17.7434	19.8262	26.6754	16.6183	20.7557	27.1458	17.2186	19.861	30.5261	16.318	18.028	26.4005	20.0394	28.365	27.4032	15.9729	21.3493	27.6015	21.415	21.5066	22.5352	20.2489	25.2692	21.6412
17912	Myo1b	chr1-208 (+380670)	No_BS	No_BS	12.0297	10.4565	11.3571	12.9967	10.9179	11.9006	9.91513	11.3708	12.0819	10.2696	11.6473	12.0545	9.42105	11.2692	9.88828	12.3023	12.8342	11.49	11.2811	11.9384	11.1226	11.3238	10.1928	12.2089
20849	Stat4	No_BS	Merged-chr1-52079915-2 (+71671)	No_BS	4.09934	3.72904	5.35493	4.38824	4.37036	5.01195	4.57172	3.57763	7.48877	3.83794	3.72426	5.34768	4.16908	2.82454	5.84361	4.04614	3.6899	5.27507	4.39444	4.59018	5.21271	4.30329	4.27908	4.33704
20846	Stat1	No_BS	No_BS	No_BS	2.75346	3.10671	1.99636	3.31594	3.11201	1.89957	3.20656	3.17751	1.83646	3.65494	4.02519	2.27932	2.67128	3.80293	1.76212	3.88954	3.96603	2.09807	2.61884	2.77584	2.74018	3.31982	2.74544	3.31788
14660	Gls	No_BS	No_BS	No_BS	11.4218	11.3493	18.367	11.498	10.5144	22.9323	10.1651	11.0353	27.0204	13.2623	11.0846	20.6404	11.3919	11.4262	25.8418	10.796	9.97799	24.7273	13.7127	14.9816	16.0736	14.9958	16.22	15.1671
17936	Nab1	No_BS	No_BS	No_BS	2.44369	2.82862	2.97936	2.15939	2.6323	2.42741	2.41209	3.08759	2.54661	2.57557	3.07525	1.92626	3.03567	3.53329	2.74604	2.36657	3.63883	2.22698	2.75056	2.40637	2.68209	2.52569	3.105	2.74413
227094	Tmem194b	No_BS	No_BS	No_BS	4.47746	4.17072	4.73226	5.26041	4.68834	5.99535	3.95776	3.6322	6.50674	4.57609	4.06008	6.10468	3.88017	3.73125	5.53427	5.18047	4.58101	5.36644	4.46015	5.3147	4.6989	4.91362	4.3819	5.04264
98682	Mfsd6	No_BS	No_BS	No_BS	0.271851	0.268041	0.201771	0.463449	0.315449	0.280705	0.327983	0.383815	0.36376	0.586068	0.763386	0.399871	0.413004	0.293083	0.42209	0.626089	0.689248	0.469056	0.247221	0.353201	0.358519	0.583108	0.376059	0.594797
16329	Inpp1	No_BS	No_BS	No_BS	2.27784	2.71166	1.6022	2.12896	1.86967	1.22692	2.08809	3.11582	1.35949	2.23433	1.85423	1.67195	2.56615	3.16994	1.8777	1.76147	2.84457	1.39885	2.19723	1.74185	2.1878	1.92017	2.53793	2.00163
227095	Hibch	No_BS	No_BS	No_BS	14.6338	17.2623	14.5091	13.445	13.7485	14.6149	17.4129	12.9539	17.1505	12.2952	13.4606	13.471	15.705	15.2015	17.4034	12.1522	13.4665	13.6014	15.4684	13.9362	15.8391	13.0756	16.1033	13.0734
67080	1700019D03Rik	chr1-138 (-417)	Merged-chr1-52953289-2 (-445)	No_BS	21.4513	22.3627	27.2644	25.7489	25.9258	29.8606	27.5467	21.1911	22.964	28.2734	21.1064	20.256	23.8612	15.9278	18.8053	23.9297	18.152	19.3687	23.6928	27.1784	23.9006	23.2119	19.5314	20.4835
17700	Mstn	No_BS	No_BS	No_BS	0	0	0	0	0	0	0	0	0	0	0	0	0	0	0	0	0	0	0	0	0	0	0	0
69397	1700019A02Rik	No_BS	No_BS	No_BS	0.716088	0.188661	0.791509	0.945848	0	0.645837	0.179028	0.173995	1.20673	0.0645071	0.283581	0.617025	0.414887	0.282484	0.590294	0.0664509	0.271901	1.04546	0.56542	0.530562	0.519918	0.321705	0.429222	0.461272
227099	Pms1	No_BS	No_BS	No_BS	11.7975	11.6078	11.1971	10.8473	10.1844	13.4646	10.8916	9.43327	15.919	9.3306	10.416	11.4346	11.1072	11.3402	15.2535	9.57051	10.0489	14.3247	11.5341	11.4988	12.0813	10.3937	12.567	11.3147
227102	Ormdl1	No_BS	No_BS	No_BS	13.0966	16.4684	20.1873	12.8335	14.374	21.3876	13.783	11.7605	24.1823	11.0646	12.5456	15.2058	13.1758	18.4457	22.0044	13.0682	12.172	21.813	16.5841	16.1984	16.5753	12.9387	17.8753	15.6844
72085	Osgepl1	No_BS	No_BS	No_BS	9.72087	10.6322	13.5325	8.88136	7.11606	15.9886	10.685	9.41341	18.4346	7.68619	8.3332	11.1715	10.0707	12.0762	16.2531	8.45278	8.37087	15.1985	11.2952	10.662	12.8444	9.06364	12.8	10.674
70396	Asnsd1	No_BS	No_BS	No_BS	44.0841	49.861	76.228	47.4075	53.7102	94.8922	46.8247	41.2791	78.7953	48.396	48.5106	66.4683	44.5541	56.6818	57.5557	43.4903	44.3449	69.0823	56.7243	65.3366	55.633	54.4583	52.9306	52.3058
627872	Dnah7a	chr1-61 (-43402)	Merged-chr1-53750151-1 (-43367)	Merged-chr1-53750191-1 (-43407)	0.0225147	0.0192781	0.0882321	0.0457818	0.0478965	0.0618694	0.0274406	0.0207427	0.069361	0.0626201	0.0253552	0.0700556	0.0211974	0.0108245	0.0565486	0.0407412	0.0333407	0.0953835	0.0433416	0.0518492	0.0391814	0.0526769	0.0295235	0.0564885
98267	Stk17b	chr1-61 (+35038)	Merged-chr1-53750151-1 (+35073)	Merged-chr1-53750191-1 (+35033)	10.5783	11.3672	13.6807	12.1405	12.0139	19.9659	10.4215	10.1618	19.7638	11.9068	12.774	17.6508	10.4355	13.6026	18.9263	15.7482	15.7792	28.2245	11.8754	14.7068	13.449	14.1105	14.3215	19.9173
329152	Hecw2	No_BS	No_BS	No_BS	0.371764	0.382682	0.481652	0.402073	0.414884	0.50019	0.237693	0.346516	0.333784	0.413952	0.403961	0.379267	0.407392	0.457092	0.424518	0.492595	0.439216	0.537042	0.412033	0.439049	0.305997	0.39906	0.429667	0.489618
102465783	Mir7681	No_BS	No_BS	No_BS	0	0	0	0	0	0	0	0	0	0	0	0	0	0	0	0	0	0	0	0	0	0	0	0
78016	Ccdc150	chr1-209 (+32552)	No_BS	No_BS	0.136081	0.124287	0.319972	0.147579	0.0882264	0.186142	0.157255	0.219699	0.397489	0.23373	0.221848	0.203244	0.12812	0.255882	0.182287	0.251717	0.349293	0.233679	0.193447	0.140649	0.258148	0.219607	0.188763	0.27823
98488	Gtf3c3	chr1-17 (-46118), chr1-209 (+155736)	Merged-chr1-54485107-2 (-46136)	Merged-chr1-54485091-2 (-46120)	22.0672	24.2486	24.217	25.8845	26.8395	26.6815	25.8618	25.1468	26.6108	28.3727	28.5347	26.3352	26.2515	28.5716	24.7256	31.7373	34.346	32.2533	23.5109	26.4685	25.8731	27.7475	26.5162	32.7789
241062	Pgap1	chr1-34 (-196884), chr1-17 (+72595)	Merged-chr1-54754469-2 (-196785), Merged-chr1-54485107-2 (+72577)	Merged-chr1-54485091-2 (+72593)	3.57487	2.41896	3.63777	6.40547	3.55197	6.86127	3.44847	3.14528	5.54735	7.30237	4.52539	8.60209	3.46714	2.62855	4.62687	24.8633	10.8842	28.9809	3.21053	5.60624	4.04703	6.80995	3.57419	21.5761
329154	Ankrd44	chr1-34 (+171819)	Merged-chr1-54754469-2 (+171918)	No_BS	0.66375	0.295405	0.5217	0.940457	0.464978	0.758437	0.542361	0.438274	0.623842	0.961744	0.514014	0.609086	0.450151	0.367792	0.391815	2.41574	0.805208	1.37263	0.493618	0.721291	0.534826	0.694948	0.403253	1.53119
81898	Sf3b1	No_BS	No_BS	No_BS	70.2576	78.3636	88.5049	71.3296	70.0537	87.1313	71.9629	68.3949	90.8501	73.9473	68.2889	84.5141	71.0211	68.6755	79.6828	73.5643	65.7145	92.3126	79.0421	76.1715	77.0693	75.5834	73.1265	77.1971
67876	Coq10b	No_BS	No_BS	No_BS	8.07137	11.6266	13.8498	8.3751	10.054	15.1297	9.49995	10.6807	14.9261	9.14877	12.1581	15.5524	10.4512	13.5418	15.457	10.0015	12.2967	17.0482	11.1826	11.1863	11.7023	12.2864	13.15	13.1155
15510	Hspd1	No_BS	No_BS	No_BS	471.01	466.822	570.702	461.262	424.312	488.984	468.673	413.534	436.225	463.325	446.057	483.133	474.868	389.419	428.362	400.263	351.023	462.195	502.845	458.186	439.477	464.172	430.883	404.494
15528	Hspe1	No_BS	No_BS	No_BS	516.983	635.247	813.733	503.716	567.395	818.513	635.745	464.173	800.831	495.147	494.174	684.083	626.16	633.056	828.3	467.806	434.774	828.832	655.321	629.875	633.583	557.801	695.838	577.137
19070	Mob4	No_BS	Merged-chr1-55131183-1 (-48), Merged-chr1-55131577-2 (+346)	No_BS	25.3226	32.0911	37.6286	24.2768	28.5841	45.6918	26.2553	22.609	39.7922	27.1214	28.7062	37.9056	27.0283	28.4697	41.4513	30.2239	27.183	51.0799	31.6808	32.8509	29.5522	31.2444	32.3164	36.1623
74013	Rftn2	No_BS	No_BS	No_BS	0.0093954	0.0429055	0.0613657	0.101892	0.0913705	0.220315	0.111966	0.0791401	0.0900494	0.264065	0.133015	0.116937	0.12384	0.0602275	0.125855	0.249353	0.139131	0.114635	0.0378889	0.137859	0.0937183	0.171339	0.103307	0.167706
212679	Mars2	No_BS	No_BS	No_BS	6.18367	8.50992	8.32815	5.8917	7.95408	7.58735	5.27107	6.54871	6.4977	5.10837	5.90731	6.18988	5.91214	6.66801	6.67799	5.50807	6.19935	5.55624	7.67391	7.14438	6.10583	5.73519	6.41938	5.75455
75388	Boll	No_BS	No_BS	Merged-chr1-55363818-2 (-499)	0.494177	0.501497	0.788993	0.76916	0.734232	1.16686	0.624605	0.722673	1.35326	1.02883	1.34273	1.33264	0.930528	0.703963	1.06651	2.48398	1.54491	1.67487	0.594889	0.890083	0.900178	1.23473	0.900333	1.90125
227120	Plcl1	chr1-5 (+117770)	Merged-chr1-55524158-2 (+117770)	Merged-chr1-55524178-2 (+117790)	0.0526888	0.0781987	0.0412961	0.0619022	0.032025	0.0308878	0.0513732	0.0499289	0.0504991	0.0617025	0.0339064	0.0393465	0.178582	0.0472853	0.0352893	0.120767	0.0520159	0.0285717	0.0573945	0.041605	0.0506004	0.0449851	0.0870522	0.0671183
329159	9130227L01Rik	No_BS	No_BS	No_BS	0.126843	0.0620622	0.165694	0.0818809	0.0440553	0.185898	0.0392622	0.0190792	0.148863	0.0848813	0.0233218	0.0676591	0	0.0464631	0.169911	0.0437195	0.035778	0.122827	0.1182	0.103945	0.0690681	0.0586208	0.0721247	0.0674417
69356	1700003I22Rik	No_BS	No_BS	No_BS	0	0	0	0	0	0	0	0	0	0	0	0	0	0	0	0	0	0	0	0	0	0	0	0
71066	Hsfy2	No_BS	No_BS	No_BS	0	0	0	0	0	0	0	0	0	0	0	0	0	0	0	0	0	0	0	0	0	0	0	0
212712	Satb2	No_BS	No_BS	No_BS	0.444296	0.410265	0.58038	0.419244	0.428902	0.38303	0.453023	0.756742	0.223651	0.589167	0.714787	0.349679	0.498271	1.07222	0.280072	0.535982	1.16751	0.372024	0.478314	0.410392	0.477805	0.551211	0.616854	0.691838
329160	9130024F11Rik	No_BS	No_BS	No_BS	0.0926435	0.0846142	0.0726116	0.108844	0.022524	0.0407329	0.110404	0.156072	0.0380543	0.14104	0.0834655	0.0691836	0.0610562	0.0950199	0.0744598	0.156466	0.128044	0.0376785	0.0832898	0.0573668	0.10151	0.0978964	0.0768453	0.107396
407809	BC055402	No_BS	No_BS	No_BS	0	0	0	0	0	0	0	0	0	0	0	0.0130103	0	0	0	0	0	0	0	0	0	0.00433677	0	0
75323	4930558J18Rik	No_BS	No_BS	No_BS	1.71678	1.59489	1.95679	1.70363	1.59591	1.65271	1.33111	1.20507	1.82057	1.45858	0.97481	1.27785	1.37864	1.55366	1.51058	1.29948	1.44561	1.8026	1.75615	1.65075	1.45225	1.23708	1.48096	1.5159
73467	1700066M21Rik	No_BS	No_BS	No_BS	3.34234	3.44867	6.81166	3.21784	2.55511	7.15411	2.77484	2.51543	7.65868	2.90533	2.61652	5.77532	2.75749	3.35739	6.385	3.29771	2.88011	7.17821	4.53422	4.30902	4.31632	3.76572	4.16663	4.45201
68736	Tyw5	No_BS	No_BS	No_BS	15.8517	11.2697	25.6954	14.8251	10.2772	30.7647	13.01	10.1407	32.0301	10.0693	10.7264	24.1236	14.1102	10.3154	27.4755	11.7345	8.65451	30.7044	17.6056	18.6223	18.3936	14.9731	17.3004	17.0312
68115	9430016H08Rik	No_BS	No_BS	No_BS	17.6467	25.8603	20.9747	16.4428	23.3847	23.1885	20.6428	18.9372	19.9148	19.1393	19.3573	19.8872	20.2708	22.7245	20.7055	16.8231	19.094	22.9692	21.4939	21.0053	19.8316	19.4613	21.2336	19.6288
67198	Spats2l	No_BS	No_BS	No_BS	1.11852	0.584873	0.769594	0.987704	0.736939	0.638193	1.12852	1.0878	0.876801	0.869913	1.34068	0.669499	1.1817	1.93756	0.892118	1.46264	1.43298	1.3543	0.824329	0.787612	1.03104	0.960032	1.33713	1.41664
51960	Kctd18	No_BS	No_BS	No_BS	3.52578	3.80884	5.56315	3.82596	3.39503	5.37104	3.75127	3.73894	5.43311	4.32134	3.69208	5.2376	3.8549	3.54818	4.50286	4.23812	4.06712	5.63644	4.29926	4.19735	4.30777	4.41701	3.96864	4.64723
68549	Sgol2a	No_BS	No_BS	No_BS	24.9593	21.8555	34.9949	26.2279	21.38	41.0472	23.8069	16.2487	40.522	24.9875	17.8265	31.9856	22.9286	14.1602	31.5633	26.0327	16.362	38.0038	27.2699	29.5517	26.8592	24.9332	22.884	26.7995
11761	Aox1	No_BS	No_BS	No_BS	0.0866984	0.116977	0.226507	0.185198	0.124555	0.150166	0.111004	0.149377	0.237415	0.0646102	0.0912967	0.147145	0.0742053	0.151572	0.200598	0.171147	0.163401	0.192331	0.143394	0.153306	0.165932	0.101017	0.142125	0.175626
71724	Aox3	No_BS	No_BS	No_BS	0.0475286	0.0361745	0.103477	0.0501126	0.0770362	0.0348285	0.0171637	0.00834057	0.0325382	0.0371064	0	0.0591552	0.00745798	0.0304674	0.0212222	0.0382245	0.00782028	0.0214779	0.0623934	0.0539924	0.0193475	0.0320872	0.0197158	0.0225076
71872	Aox4	No_BS	No_BS	No_BS	0.034732	0.0793045	0.18148	0.0753331	0.126664	0.101805	0.0903061	0.146279	0.133154	0.097617	0.0625823	0.112393	0.0588598	0.133586	0.13027	0.108938	0.116581	0.131839	0.0985056	0.101267	0.123246	0.0908642	0.107572	0.119119
213043	Aox2	No_BS	No_BS	No_BS	0.00723147	0	0	0	0.00879077	0	0	0.00761409	0	0	0	0.00900044	0.0136167	0	0	0.00872377	0	0.0196071	0.00241049	0.00293026	0.00253803	0.00300015	0.00453891	0.00944363
66882	Bzw1	No_BS	No_BS	No_BS	144.477	195.996	277.878	158.764	178.743	284.122	181.854	172.287	295.401	187.61	194.076	248.782	184.931	228.07	295.125	193.705	173.647	308.78	206.117	207.21	216.514	210.156	236.042	225.377
12747	Clk1	No_BS	Merged-chr1-58424736-2 (-670)	No_BS	20.2102	19.8172	69.2227	23.3693	20.7069	89.2526	13.5224	14.0254	85.7875	20.76	16.7268	65.6484	15.2791	12.0162	71.464	18.9569	15.8557	88.5946	36.4167	44.4429	37.7785	34.3784	32.9198	41.1357
70225	Ppil3	No_BS	No_BS	Merged-chr1-58486341-2 (-40912)	15.8187	18.5613	17.3347	13.4859	17.2426	19.2166	20.9077	18.7839	22.8382	14.6346	19.4998	16.2975	20.8505	24.179	23.8503	15.945	17.161	23.1607	17.2382	16.6484	20.8433	16.8106	22.9599	18.7556
65102	Nif3l1	No_BS	No_BS	No_BS	28.6828	37.5017	48.2223	27.9524	36.6419	50.0406	31.2695	30.0623	47.6256	25.9269	30.774	41.9043	31.9764	36.0584	49.7352	22.2172	28.0413	45.977	38.1356	38.2116	36.3192	32.8684	39.2567	32.0785
18393	Orc2	No_BS	No_BS	Merged-chr1-58486341-2 (+18768)	49.6579	64.9973	68.7319	47.0868	52.5605	71.5268	56.803	52.2241	66.7036	47.0563	50.8176	54.2004	58.3311	57.0495	66.5837	39.8746	41.2776	54.4611	61.129	57.058	58.5769	50.6914	60.6548	45.2044
213056	Fam126b	No_BS	No_BS	No_BS	2.39915	2.60752	2.8071	2.48053	2.41913	2.61383	2.21618	2.37972	2.80089	2.4328	2.2034	2.49166	2.14285	2.62773	2.75085	2.04131	2.25872	2.6763	2.60459	2.5045	2.46559	2.37595	2.50715	2.32544
66495	Ndufb3	No_BS	No_BS	No_BS	58.1035	105.098	94.2179	61.6633	100.621	106.182	75.8887	76.8994	109.866	65.3065	81.1321	83.3866	76.5244	95.2171	95.8332	66.0996	82.8697	109.046	85.8064	89.489	87.5515	76.6084	89.1916	86.005
100504501	Gm20257	No_BS	No_BS	No_BS	0.110697	0	0	0.0666944	0.0448555	0	0.119926	0.116554	0	0.0432115	0.0474908	0.0918506	0.10422	0.141921	0.0494277	0.133541	0.109283	0	0.036899	0.0371833	0.0788266	0.060851	0.098523	0.0809414
108812	Als2cr12	No_BS	No_BS	No_BS	0	0.0250192	0.0572538	0	0.0532801	0.0321177	0	0	0.0300056	0	0	0.0272754	0.0206325	0.028096	0.0587111	0.026437	0.0649043	0	0.0274243	0.0284659	0.0100019	0.00909181	0.0358132	0.0304471
12633	Cflar	chr1-62 (+51212)	No_BS	No_BS	1.37703	1.15194	1.13438	1.67426	1.11095	1.43634	1.4112	1.46731	1.54006	2.35354	1.69779	1.7705	1.9155	1.46855	1.50669	2.3596	1.8126	1.97333	1.22112	1.40718	1.47285	1.94061	1.63025	2.04851
12370	Casp8	chr1-62 (-32602)	No_BS	No_BS	0.429779	0.449774	0.577011	0.539457	0.740139	0.559889	0.646679	0.955317	0.784605	0.866799	1.15239	0.624064	1.2139	1.79076	0.607689	1.05134	1.03715	0.712119	0.485521	0.613162	0.795534	0.881083	1.20412	0.933537
70827	Trak2	No_BS	No_BS	No_BS	7.69898	7.20359	7.92423	8.07836	7.65683	8.00632	7.23752	8.15879	7.063	9.10034	8.51984	8.16322	6.94629	6.88316	7.10276	8.53325	7.79737	6.88071	7.60893	7.91384	7.48644	8.59447	6.9774	7.73711
227154	Stradb	No_BS	No_BS	No_BS	3.47313	3.91409	3.89435	3.87973	3.85962	3.03661	3.53659	3.70398	3.2247	4.36404	3.6835	3.7476	3.29799	4.01323	3.23471	4.04599	4.09098	2.99078	3.76052	3.59199	3.48842	3.93171	3.51531	3.70925
73463	Als2cr11	No_BS	No_BS	No_BS	0.0810359	0.0740126	0.296398	0.0292942	0.0197019	0.213776	0.0351167	0	0.0887636	0.0379596	0.0417188	0.0806872	0.0457768	0.0207786	0.0434203	0.0586551	0	0.0439435	0.150482	0.0875908	0.0412934	0.0534552	0.0366586	0.0341996
381259	Tmem237	No_BS	No_BS	No_BS	12.3824	17.0758	12.8805	10.5732	13.7749	10.1389	13.4526	14.6787	15.2753	11.7523	12.5104	11.2261	15.368	17.312	13.2083	11.5571	12.6219	14.0323	14.1129	11.4957	14.4689	11.8296	15.2961	12.7371
227157	Mpp4	No_BS	No_BS	No_BS	0.0447522	0.025546	0.0730742	0.0606667	0.027201	0.016397	0.0363623	0	0.0765934	0.0262041	0	0.0278498	0.0105335	0.0430314	0.0599473	0	0.0331355	0.0455023	0.0477908	0.0347549	0.0376519	0.0180179	0.0378374	0.0262126
74018	Als2	No_BS	No_BS	No_BS	7.70505	5.03543	6.19189	7.81658	5.11061	5.34712	7.31397	6.7304	5.96496	7.54907	6.00574	6.07705	7.70792	5.23232	5.49982	8.72562	6.49502	4.89949	6.31079	6.09144	6.66978	6.54395	6.14669	6.70671
271697	Cdk15	chr1-168 (+119536), chr1-33 (+166180), chr1-211 (+219934)	Merged-chr1-59423031-2 (+166124)	Merged-chr1-59400092-2 (+143185)	0.0467671	0.0800884	0.183274	0.401521	0.113703	0.342704	0.075999	0.0738623	0.128067	0.191687	0.0300957	0.203726	0.0660463	0	0.187939	0.423135	0.115425	0.190204	0.103377	0.285976	0.0926428	0.141836	0.0846618	0.242921
14369	Fzd7	chr1-168 (-105704), chr1-33 (-59060), chr1-211 (-5306)	Merged-chr1-59423031-2 (-59116)	Merged-chr1-59400092-2 (-82055)	19.6064	16.1197	13.35	24.6251	18.4998	17.904	22.5404	19.8725	16.8839	29.6469	29.32	25.1266	22.807	20.4961	21.7516	26.9187	31.8134	26.1517	16.3587	20.343	19.7656	28.0312	21.6849	28.2946
381260	Gm973	No_BS	Merged-chr1-59516304-2 (+40)	No_BS	0.268998	0.153553	0.451788	0.52094	0.280288	0.492798	0.228976	0.252885	0.289389	0.19126	0.234931	0.442416	0.226125	0.16012	0.205905	0.173844	0.199172	0.273507	0.291446	0.431342	0.257084	0.289536	0.197383	0.215508
22218	Sumo1	No_BS	No_BS	No_BS	228.8	169.209	402.48	200.585	150.108	507.841	198.971	125.646	444.631	151.664	144.732	328.605	185.68	132.291	432.752	154.177	115.367	441.59	266.83	286.178	256.416	208.334	250.241	237.044
55989	Nop58	chr1-25 (+12916)	Merged-chr1-59697927-2 (+12921)	Merged-chr1-59698016-2 (+13010)	188.051	210.96	331.817	181.702	181.877	312.312	219.407	157.698	304.362	191.873	170.247	249.476	205.122	152.109	285.453	173.912	136.99	268.704	243.609	225.297	227.156	203.865	214.228	193.202
100217459	Snord70	No_BS	No_BS	No_BS	1.95495	2.2319	3.40498	4.7114	1.58433	4.77523	0.705978	2.05839	1.78448	3.05253	0.838705	0.811058	2.4541	0.835458	0.872912	0	2.57331	1.76686	2.53061	3.69032	1.51628	1.56743	1.38749	1.44673
100217421	Snord11	No_BS	No_BS	No_BS	1.09643	0	0	0	1.33285	2.41035	1.18784	0	0.750616	0.641999	0	0	1.03228	0	0	0	0	0.743204	0.365476	1.24773	0.646151	0.214	0.344093	0.247735
12168	Bmpr2	chr1-25 (-66357)	Merged-chr1-59697927-2 (-66352)	Merged-chr1-59698016-2 (-66263)	2.82543	2.18721	3.21066	3.20379	2.27589	4.48786	2.59525	3.55219	4.82399	4.05663	3.16736	4.1253	2.97393	2.27647	4.7487	3.77301	3.56741	5.30847	2.7411	3.32251	3.65715	3.7831	3.33303	4.2163
72750	Fam117b	No_BS	No_BS	No_BS	6.54053	6.28432	6.66876	6.68367	5.88727	6.57643	5.98372	5.71035	6.26359	6.40236	5.99218	6.28402	5.45276	5.04083	6.48737	6.48235	5.82855	6.52325	6.49787	6.38245	5.98589	6.22618	5.66032	6.27805
70375	Ica1l	chr1-212 (-4548)	No_BS	No_BS	0.113548	0.237661	0.370817	0.239442	0.218551	0.388298	0.235777	0.269001	0.31094	0.221622	0.146141	0.23554	0.169265	0.133444	0.228153	0.422355	0.205513	0.423321	0.240675	0.282097	0.271906	0.201101	0.176954	0.350396
57750	Wdr12	No_BS	No_BS	No_BS	31.0592	44.1604	56.2881	28.1527	39.4975	50.0927	40.7972	41.9338	60.6098	33.3416	39.8298	45.4435	40.0488	46.9681	57.6249	28.0027	35.1064	47.8481	43.8359	39.2476	47.7803	39.5383	48.2139	36.9858
241066	Carf	No_BS	No_BS	No_BS	1.19918	1.2737	1.15342	1.35334	1.23293	1.02302	1.29269	1.19353	1.57657	1.51611	1.30536	1.32916	1.17395	1.14733	1.22274	1.51142	1.42535	1.4882	1.20877	1.20309	1.35426	1.38354	1.18134	1.47499
269198	Nbeal1	No_BS	No_BS	No_BS	2.25629	1.39054	1.49418	2.95683	1.60199	1.58023	1.80471	1.8651	1.62082	2.93958	1.7365	1.31358	2.01686	1.3787	1.44433	2.70125	1.9149	1.48107	1.71367	2.04635	1.76354	1.99655	1.61329	2.03241
77951	Cyp20a1	No_BS	No_BS	No_BS	14.8872	15.1311	12.2033	16.2407	18.1813	13.5227	14.4083	18.3884	12.5074	14.4431	16.9987	13.8323	16.8108	22.9804	12.3289	17.5708	21.0348	14.2556	14.0739	15.9816	15.1014	15.0914	17.3734	17.6204
329165	Abi2	chr1-106 (+23096), chr1-213 (+26080)	No_BS	Merged-chr1-60432704-1 (+23085)	8.78179	9.06881	9.47029	11.9491	11.6734	10.5742	9.30723	9.26471	9.57808	11.7804	10.2534	10.2536	9.42192	8.37556	8.96788	13.2582	11.8088	13.0104	9.10696	11.3989	9.38334	10.7625	8.92178	12.6925
77300	Raph1	chr1-213 (+131066), chr1-106 (+134050)	Merged-chr1-60566578-2 (+187)	Merged-chr1-60432704-1 (+134061)	5.56873	4.96932	5.57208	6.42611	5.67349	5.4576	4.87153	5.05367	5.73669	6.18423	4.4856	4.99312	5.20012	3.88057	5.61241	6.71333	5.05631	5.94196	5.37004	5.8524	5.22063	5.22099	4.8977	5.90387
12487	Cd28	chr1-72 (+106614)	Merged-chr1-60852981-1 (+106623)	No_BS	0.0320014	0.0365348	0.0209016	0.0144605	0.0194509	0.0586257	0.00866732	0.0673892	0.0766786	0.018738	0.0205936	0.0298722	0.0451936	0.0410278	0.0643007	0.0289539	0.0394909	0.0433837	0.0298126	0.0308457	0.0509117	0.0230679	0.050174	0.0372762
12477	Ctla4	chr1-72 (-56053)	Merged-chr1-60852981-1 (-56044)	No_BS	0	0	0.0233399	0	0	0	0	0	0	0	0	0	0	0.022907	0	0	0	0	0.00777997	0	0	0	0.00763568	0
54167	Icos	No_BS	No_BS	No_BS	0	0	0.0277211	0	0.0257971	0	0	0.011172	0	0.0124258	0.0273127	0.0396185	0.00998979	0	0.0142133	0	0	0	0.00924035	0.00859902	0.003724	0.0264523	0.0080677	0
77341	9530026F06Rik	No_BS	No_BS	No_BS	0.0774383	0.132613	0.151736	0.0699843	0.0470681	0	0.0419471	0.122303	0	0.090686	0	0.144572	0.109361	0.0496405	0.155598	0.0467093	0.0764494	0.0524909	0.120596	0.0390175	0.0547502	0.0784194	0.104866	0.0585498
72823	Pard3b	No_BS	No_BS	No_BS	0.0617329	0.117464	0.0430086	0.0818263	0.0550324	0.114601	0.187263	0.0779991	0.140875	0.125309	0.0794531	0.107568	0.178238	0.0580401	0.0882065	0.079437	0.0731334	0.0446347	0.0740684	0.0838199	0.135379	0.10411	0.108161	0.065735
18187	Nrp2	chr1-54 (+407019)	Merged-chr1-63110743-2 (+407041)	No_BS	3.5507	3.84981	3.93835	1.2951	1.96432	2.31212	3.9665	3.12518	3.80197	1.81763	1.19858	2.49808	4.56004	3.60907	3.74239	1.57487	1.59105	0.818604	3.77962	1.85718	3.63121	1.8381	3.9705	1.32817
74992	4930487H11Rik	No_BS	No_BS	No_BS	0	0.0881122	0	0	0.0469103	0.0565558	0	0.0812623	0.105673	0.045191	0.0496663	0	0	0	0.051692	0.0465527	0	0	0.0293707	0.0344887	0.0623119	0.0316191	0.0172307	0.0155176
227195	Ino80d	chr1-54 (+3546)	Merged-chr1-63114248-2 (+19), Merged-chr1-63110743-2 (+3524)	Merged-chr1-63114307-2 (-40)	6.27235	4.65153	5.19223	6.67449	4.54946	4.35873	4.6657	4.64742	3.9952	6.97169	3.92962	3.8541	4.53778	2.1634	3.55643	5.95298	4.15337	3.43316	5.37204	5.19423	4.4361	4.91847	3.4192	4.51317
100380944	Ino80dos	No_BS	No_BS	No_BS	0.651651	1.09407	1.5022	0.762138	0.44268	0.814598	0.352989	0.524688	0.944726	0.471346	0.44402	0.644076	0.649614	0.393157	0.641847	0.416185	0.340586	0.623598	1.08264	0.673139	0.607468	0.519814	0.561539	0.460123
227197	Ndufs1	No_BS	No_BS	No_BS	47.3047	62.1696	74.4946	47.9445	58.8389	70.816	51.6958	52.4042	70.812	45.3929	52.4699	60.3891	50.0583	55.8975	65.2158	44.4689	46.9335	66.3056	61.323	59.1998	58.304	52.7506	57.0572	52.5694
55949	Eef1b2	No_BS	No_BS	No_BS	812.765	1293.49	864.417	797.231	1204.7	870.447	1034.47	897.571	814.771	845.976	890.568	785.714	1029.35	1077.34	872.249	778.804	828.668	956.42	990.223	957.459	915.604	840.752	992.98	854.631
100217464	Snora41	No_BS	No_BS	No_BS	12.8369	8.37455	25.1532	8.28664	5.20165	19.7094	6.95357	7.72352	24.6906	7.15858	4.32712	19.7812	7.19398	6.26963	21.6992	8.11171	6.03476	19.4746	15.4549	11.0659	13.1226	10.4223	11.7209	11.207
241070	Gpr1	No_BS	No_BS	No_BS	0.768353	0.592111	1.05388	0.329837	0.326911	0.900867	0.582687	0.444954	0.789023	0.449899	0.247227	0.430339	0.506379	0.541793	0.746199	0.324419	0.227562	0.416657	0.804781	0.519205	0.605555	0.375822	0.598124	0.32288
73884	Zdbf2	No_BS	No_BS	No_BS	9.14738	6.37947	6.14125	7.53934	5.10098	5.54448	8.3595	8.1134	8.24528	8.70352	5.45484	5.86442	10.7101	5.45059	10.6463	9.64813	7.03849	9.97568	7.2227	6.0616	8.2394	6.67426	8.93567	8.88743
23792	Adam23	No_BS	No_BS	Merged-chr1-63507985-2 (+62081)	19.9581	25.9791	23.6372	13.9113	20.3055	16.2886	19.87	21.3155	21.4749	14.4975	13.6515	14.3329	19.2538	15.5367	22.2879	11.6748	14.9138	13.0995	23.1915	16.8351	20.8868	14.1606	19.0261	13.2294
241073	Dytn	No_BS	No_BS	Merged-chr1-63507985-2 (+178942)	0	0	0	0	0	0	0	0	0	0	0	0	0	0	0	0	0	0	0	0	0	0	0	0
76668	Mdh1b	No_BS	No_BS	No_BS	0.161484	0.184361	0.184578	0.127698	0.122691	0.236668	0.196816	0.233789	0.304019	0.118194	0.0519595	0.100493	0.266064	0.103517	0.162236	0.267862	0.119567	0.301017	0.176808	0.162352	0.244875	0.0902156	0.177272	0.229482
75619	Fastkd2	No_BS	No_BS	No_BS	15.3991	22.9815	29.885	15.0368	20.4094	30.5442	18.796	19.2433	32.239	15.6357	18.0024	22.8678	19.2057	25.9044	29.4764	14.0529	15.9365	26.2816	22.7552	21.9968	23.4261	18.8353	24.8622	18.757
74426	4933402D24Rik	No_BS	No_BS	No_BS	0.0590048	0	0.051385	0.0533252	0.0478186	0.0288254	0.063924	0	0.0269298	0	0.101256	0	0.0370351	0.025216	0.105386	0.0949082	0	0.0266639	0.0367966	0.0433231	0.0302846	0.033752	0.0558789	0.040524
433315	Gm13749	No_BS	No_BS	No_BS	0	0	0	0	0	0	0	0	0	0	0	0	0	0	0	0	0	0	0	0	0	0	0	0
100316708	Mir1958	No_BS	No_BS	No_BS	0	0	0	0	0	0	0	0	0	0	0	0	0	0	0	0	0	0	0	0	0	0	0	0
93691	Klf7	chr1-63 (-177876), chr1-214 (-105089), chr1-21 (-74780)	Merged-chr1-64299250-2 (-177861), Merged-chr1-64196160-2 (-74771)	Merged-chr1-64196172-2 (-74783)	4.70496	3.77774	3.2081	6.40147	3.61396	2.57634	4.17299	4.76337	3.29181	6.87218	6.72094	3.28187	5.18419	3.51318	4.08622	7.92128	6.55897	3.64481	3.89693	4.19725	4.07605	5.625	4.26119	6.04169
102466760	Mir6899	No_BS	No_BS	No_BS	0	0	0	0	0	0	0	0	0	0	0.694552	0	0	0	0	0	0	0	0	0	0	0.231517	0	0
12912	Creb1	chr1-21 (-336635), chr1-214 (-306326), chr1-63 (-233539)	Merged-chr1-64196160-2 (-336644), Merged-chr1-64299250-2 (-233554)	Merged-chr1-64196172-2 (-336632)	8.35856	7.81018	7.40951	9.34055	8.09182	8.17477	7.77573	6.61141	8.64238	9.35142	8.42469	7.83561	7.81546	6.43604	8.30132	9.79153	7.48655	9.40774	7.85942	8.53571	7.67651	8.53724	7.5176	8.89527
67099	Mettl21a	chr1-107 (-38496)	No_BS	No_BS	3.96417	5.45752	4.02761	4.63629	4.78746	4.67063	4.09817	5.04689	4.02646	4.33891	5.55225	4.98226	3.70784	6.12868	4.58131	4.86036	4.9239	5.40927	4.4831	4.69812	4.39051	4.95781	4.80594	5.06451
69941	2810408I11Rik	No_BS	No_BS	No_BS	11.4802	9.1801	18.54	8.58029	8.95046	18.032	8.92126	7.19137	18.7696	6.97735	7.10723	11.7564	8.39143	9.00491	16.3515	6.77855	8.1774	17.2052	13.0668	11.8543	11.6274	8.61365	11.2493	10.7204
227210	Ccnyl1	chr1-107 (-35681)	No_BS	No_BS	10.9339	10.5282	14.6222	12.3358	11.1959	14.8651	14.2504	13.5141	15.9408	14.6159	15.2882	16.0041	13.3513	12.4588	14.8046	15.5406	13.9183	16.9519	12.0281	12.7989	14.5684	15.3027	13.5382	15.4703
14367	Fzd5	chr1-139 (-211846)	No_BS	No_BS	18.4277	14.5425	19.3149	12.4509	8.64713	14.5834	18.8599	12.3653	13.8296	11.1791	7.45785	11.2781	16.0185	8.53692	13.6571	10.8953	8.30465	9.24383	17.4284	11.8938	15.0183	9.97168	12.7375	9.48124
241075	Plekhm3	chr1-139 (+7228)	No_BS	No_BS	1.80715	1.67171	1.34895	2.4826	2.11836	1.59621	1.99714	1.63094	1.29241	2.71151	1.70807	1.48609	1.5609	1.02915	1.08609	2.13628	1.78407	1.12652	1.60927	2.06572	1.64016	1.96856	1.22538	1.68229
70861	Akr1cl	No_BS	No_BS	No_BS	0	0.0291428	0.100036	0	0.0620617	0.112234	0	0.0268772	0	0	0.0328539	0.0317709	0.0240331	0.0654535	0.0341939	0	0	0.17303	0.0430594	0.0580985	0.00895908	0.0215416	0.0412268	0.0576766
12968	Cryge	No_BS	No_BS	No_BS	0.16139	0.0614178	0.0702742	0.0486184	0.19619	0.23653	0	0	0.0736585	0.0629999	0.138478	0	0.0506492	0.0689709	0.0720628	0.0648983	0	0.0729312	0.097694	0.160446	0.0245528	0.0671592	0.0638943	0.0459432
12967	Crygd	No_BS	No_BS	No_BS	0	0.0620948	0	0.0491543	0	0.0797125	0.0589241	0	0.148941	0	0	0.0676946	0	0	0	0	0.0536951	0	0.0206983	0.0429556	0.0692884	0.0225649	0	0.0178984
12966	Crygc	No_BS	No_BS	No_BS	0	0.0626871	0.0717266	0.0992464	0	0	0.118972	0.0578138	0	0	0	0	0	0.140793	0.0735522	0.0662396	0.108415	0.148877	0.0448046	0.0330821	0.0589288	0	0.0714483	0.107844
12965	Crygb	No_BS	No_BS	No_BS	0.0545616	0.062291	0.0712733	0	0	0.159929	0	0	0	0	0	0.135817	0.0513693	0	0.0730874	0.065821	0.0538648	0	0.0627086	0.0533096	0	0.0452723	0.0414856	0.0398953
12964	Cryga	No_BS	No_BS	No_BS	0.112317	0.128228	0	0.203011	0.136536	0.576133	0.243362	0.354779	0.307569	0.0657658	0.216836	0.419377	0.0528728	0.143998	0.451359	0.135495	0.277207	0.228399	0.0801818	0.305227	0.301903	0.233993	0.216077	0.2137
98303	D630023F18Rik	No_BS	No_BS	No_BS	2.29214	2.49858	3.89077	2.49283	2.36135	2.84688	2.48323	2.7543	3.35117	2.00182	2.43341	2.46602	2.13365	3.1213	3.50408	1.98403	2.42907	2.73874	2.89383	2.56702	2.8629	2.30042	2.91968	2.38394
15926	Idh1	No_BS	No_BS	No_BS	28.2901	24.5994	41.674	30.8033	27.0197	47.5032	23.4354	25.0736	52.1767	22.2967	27.2032	44.2556	24.4343	35.4888	47.365	23.8572	28.8519	47.7053	31.5212	35.1087	33.5619	31.2518	35.7627	33.4715
18711	Pikfyve	chr1-80 (+45476), chr1-215 (+82870)	No_BS	Merged-chr1-65292869-2 (+106119)	4.75332	2.68707	4.698	4.71731	3.05886	4.79865	4.12566	3.40224	6.61329	4.57825	3.38865	5.30117	4.14585	2.59656	5.01077	4.41265	3.67169	5.44972	4.04613	4.19161	4.71373	4.42269	3.91773	4.51135
213527	Pth2r	chr1-80 (-79031), chr1-215 (-41637)	No_BS	Merged-chr1-65292869-2 (-18388)	0	0.0326679	0.0186893	0.01293	0.0347844	0	0	0.0301283	0	0	0.018414	0	0.0134701	0.0183427	0	0.0690384	0.0423733	0.0775838	0.0171191	0.0159048	0.0100428	0.00613799	0.0106043	0.0629985
12969	Crygf	No_BS	No_BS	No_BS	0	0	0	0	0	0	0	0	0	0	0	0	0	0	0	0	0	0	0	0	0	0	0	0
17756	Map2	No_BS	No_BS	No_BS	1.97089	1.17862	1.35675	2.30705	1.36146	1.50385	1.85051	1.35051	2.28734	2.13221	1.77966	1.98577	1.85558	1.17918	2.27969	1.98511	1.38362	1.66251	1.50209	1.72412	1.82945	1.96588	1.77148	1.67708
329178	Unc80	No_BS	Merged-chr1-66468125-1 (-242)	No_BS	0.0586982	0.0262227	0.0500067	0.115322	0.0775599	0.0785462	0.0691215	0.0537425	0.0803696	0.110582	0.0886859	0.0762334	0.0840972	0.0425353	0.0752099	0.144701	0.0781045	0.0830359	0.0449758	0.090476	0.0677445	0.0918336	0.0672808	0.101947
66646	Rpe	chr1-140 (-73)	Merged-chr1-66700759-1 (-72)	No_BS	22.6266	31.814	45.0131	24.1515	29.3095	54.2165	24.7122	22.5518	45.1491	24.6059	25.9271	36.6281	25.8156	27.9987	43.7312	18.8046	19.0058	38.4544	33.1513	35.8925	30.8044	29.0537	32.5152	25.4216
68691	Kansl1l	No_BS	No_BS	No_BS	0.943251	0.803514	0.805643	1.02295	0.802649	1.03149	0.801789	0.672292	0.983527	0.968664	0.812451	0.78567	0.771932	0.576747	0.767832	1.1379	1.04581	0.944306	0.850803	0.952362	0.819203	0.855595	0.705504	1.04267
11363	Acadl	No_BS	No_BS	No_BS	11.1875	11.1935	7.99026	11.6328	12.0264	7.6134	13.3302	16.4277	9.17616	13.309	15.9961	9.15771	15.4738	22.367	10.8773	17.346	18.7635	13.0515	10.1237	10.4242	12.978	12.8209	16.2394	16.387
17901	Myl1	No_BS	No_BS	No_BS	0.0311149	0	0	0	0	0	0	0	0	0	0.0400463	0.0387262	0.0585888	0	0.0416796	0.0750715	0.061435	0.126546	0.0103716	0	0	0.0262575	0.0334228	0.087684
14768	Lancl1	No_BS	No_BS	No_BS	9.1589	12.454	12.6216	8.66211	12.0938	15.1591	10.2747	11.5021	14.0775	9.56523	11.3694	12.3437	9.56333	14.5513	12.8495	8.64862	12.1757	13.1723	11.4115	11.9717	11.9514	11.0928	12.3214	11.3322
227231	Cps1	chr1-216 (+862050), chr1-169 (+926940)	Merged-chr1-68049954-2 (+926928)	No_BS	0.416039	0.460799	0.575915	0.314262	0.2491	0.62794	0.356543	0.196143	0.578144	0.269058	0.183815	0.425069	0.374159	0.246792	0.390943	0.164801	0.147126	0.151527	0.484251	0.397101	0.376943	0.292648	0.337298	0.154485
13869	Erbb4	No_BS	No_BS	No_BS	0	0	0	0	0.00986252	0	0	0	0	0.00950105	0	0	0	0	0	0.0195747	0	0.0219976	0	0.00328751	0	0.00316702	0	0.0138574
22779	Ikzf2	No_BS	No_BS	No_BS	0.142974	0.0962631	0.119722	0.102707	0.0846736	0.128948	0.131064	0.0887796	0.180702	0.124502	0.0943665	0.0775675	0.200188	0.0940013	0.0933046	0.185746	0.0796222	0.119279	0.119653	0.105443	0.133515	0.098812	0.129165	0.128216
66722	Spag16	No_BS	No_BS	No_BS	0.585979	0.274045	0.710126	0.542335	0.266052	0.610472	0.634832	0.550082	1.07299	0.768903	0.663317	0.834767	0.664693	0.46162	0.756571	0.885758	0.696983	0.928397	0.523383	0.472953	0.752634	0.755662	0.627628	0.837046
320460	Vwc2l	No_BS	Merged-chr1-70725754-1 (+39)	No_BS	0	0	0	0	0	0	0	0	0	0	0	0	0	0	0	0	0	0	0	0	0	0	0	0
12021	Bard1	No_BS	No_BS	No_BS	11.0877	8.94562	9.49855	10.9085	9.0859	8.76143	10.4187	8.51718	8.63663	11.8264	9.21174	10.0522	10.2242	6.66465	8.63635	11.3645	8.99975	8.97247	9.84397	9.58528	9.19085	10.3635	8.50839	9.7789
74591	Abca12	No_BS	No_BS	No_BS	0.0165986	0.0047375	0.0216826	0	0.00504442	0.00608163	0.00899119	0.0131076	0.0170451	0.00485954	0.00534078	0.00516474	0.00781371	0.00532011	0.0277931	0.00500597	0	0.0112512	0.0143396	0.00370869	0.013048	0.00512169	0.0136423	0.00541905
108147	Atic	No_BS	No_BS	No_BS	106.734	121.477	89.5063	102.617	117.255	75.8777	111.677	123.259	77.9151	97.7302	112.329	82.5478	114.612	121.136	83.7577	101.01	103.582	84.1574	105.906	98.5831	104.284	97.5355	106.502	96.2499
14268	Fn1	chr1-217 (-20687)	No_BS	No_BS	62.93	39.7906	36.0982	61.8518	51.5179	33.6088	64.0239	48.5973	36.2594	85.1598	47.1897	49.1394	71.7801	23.966	40.0427	84.5361	51.6404	33.9618	46.2729	48.9928	49.6269	60.4963	45.2629	56.7128
100042814	Apol7d	No_BS	No_BS	No_BS	0.289501	0.198308	0.378173	0.156981	0.211155	0.551573	0.250909	0.121928	0.237831	0.37293	0.335341	0.288255	0.21805	0.222696	0.310239	0.279394	0.114322	0.392471	0.288661	0.30657	0.203556	0.332176	0.250328	0.262062
667931	Gm8883	No_BS	No_BS	No_BS	0	0	0	0	0	0	0	0	0	0	0	0.0421846	0	0	0	0	0	0	0	0	0	0.0140615	0	0
71134	4933417E11Rik	No_BS	No_BS	No_BS	0	0	0	0	0	0	0	0.0332707	0	0	0	0	0	0	0	0	0	0	0	0	0.0110902	0	0	0
381269	Mreg	chr1-217 (+538449)	Merged-chr1-72255222-1 (-42915), Merged-chr1-72244200-1 (-31893), Merged-chr1-72226343-1 (-14036)	Merged-chr1-72244441-1 (-32134)	73.9515	95.262	107.026	69.7253	92.9289	98.9812	70.6162	53.4023	87.047	58.9898	50.1036	79.6269	66.8987	59.1634	74.5463	86.0201	60.0961	121.046	92.0799	87.2118	70.3552	62.9067	66.8695	89.054
111175	Pecr	No_BS	Merged-chr1-72255222-1 (+29092), Merged-chr1-72244200-1 (+40114), Merged-chr1-72226343-1 (+57971)	Merged-chr1-72244441-1 (+39873)	23.5496	33.6072	26.8031	22.3364	27.8835	24.7748	23.4605	20.929	20.1925	17.5436	19.8062	21.7288	20.7723	23.2793	17.8811	17.123	19.6522	17.899	27.9866	24.9982	21.5273	19.6929	20.6442	18.2247
271711	Tmem169	No_BS	No_BS	No_BS	0.0981527	0.154079	0.096162	0.133057	0.149146	0.0719253	0.0930436	0.0904278	0.134391	0.158048	0.0789544	0.106893	0.127064	0.110108	0.115045	0.192412	0.0726744	0.0498989	0.116131	0.118043	0.105954	0.114632	0.117406	0.104995
22596	Xrcc5	No_BS	No_BS	No_BS	68.4264	94.7034	104.476	62.5237	82.2776	90.5609	84.7881	77.9512	103.421	71.2077	74.5725	86.9476	79.1547	85.6655	85.3609	62.1221	74.009	84.8692	89.2021	78.454	88.7201	77.5759	83.3937	73.6668
381270	2017-03-04	No_BS	No_BS	No_BS	0.0247462	0	0.0215505	0.00745474	0.0100274	0.0241784	0.00893643	0.00868519	0.0112942	0	0.0106165	0.0307997	0.0465968	0.0211508	0.022099	0.00995097	0.0081434	0.0447307	0.0154323	0.0138868	0.0096386	0.0138054	0.0299489	0.0209417
54380	Smarcal1	No_BS	No_BS	No_BS	5.7451	6.00701	6.22151	6.14499	6.43995	5.63086	5.55541	5.24759	5.73944	5.74616	5.49436	5.49889	5.59298	5.32802	5.17416	5.90689	5.69204	5.02036	5.99121	6.07193	5.51415	5.5798	5.36506	5.53977
319695	Ankar	No_BS	No_BS	No_BS	0	0.00862239	0.0197315	0.0204765	0	0.044275	0.00818212	0.0238563	0.0517043	0	0.00972039	0	0.0142212	0.0290483	0.0404674	0	0.00745603	0.040955	0.00945129	0.0215838	0.0279142	0.00324013	0.0279123	0.016137
19981	Rpl37a	chr1-170 (+95080)	No_BS	No_BS	793.011	1429.48	1119.54	824.172	1500.03	1106.7	841.242	934.912	897.844	757.88	1012.02	954.832	823.316	1104.8	826.306	746.847	991.637	1066.07	1114.01	1143.63	891.333	908.246	918.14	934.852
16008	Igfbp2	chr1-170 (-18163)	Merged-chr1-72824490-1 (-13), Merged-chr1-72824837-1 (+334)	No_BS	204.518	194.863	252.711	233.639	279.782	532.494	192.385	157.764	358.425	262.152	258.166	524.126	196.007	181.221	371.858	219.627	247.951	518.604	217.364	348.638	236.192	348.148	249.696	328.727
16011	Igfbp5	chr1-171 (-85499)	Merged-chr1-72960323-2 (-85439)	Merged-chr1-72960412-2 (-85528), Merged-chr1-72952007-2 (-77123)	0.448386	0.458021	0.39305	1.35431	0.939529	0.562032	0.556075	0.366506	0.420058	3.62729	2.15651	1.27034	1.11648	0.408453	0.292412	11.0603	3.65776	1.94358	0.433152	0.951955	0.447546	2.35138	0.605781	5.55388
21958	Tnp1	chr1-171 (+55516)	Merged-chr1-72960323-2 (+55576)	Merged-chr1-72960412-2 (+55487), Merged-chr1-72952007-2 (+63892)	0	0	0	0	0	0	0	0	0	0	0.104346	0	0.0763305	0	0	0	0.0800385	0.219821	0	0	0	0.034782	0.0254435	0.0999531
69449	1700027A15Rik	No_BS	No_BS	No_BS	0	0	0	0	0	0	0	0	0	0	0	0	0	0	0	0	0	0	0	0	0	0	0	0
723792	Pinc	No_BS	No_BS	No_BS	0	0	0	0	0	0	0	0	0	0	0	0	0	0	0	0	0	0	0	0	0	0	0	0
78718	D530049I02Rik	No_BS	No_BS	No_BS	0	0	0	0	0	0	0	0	0	0	0	0	0	0	0	0	0	0	0	0	0	0	0	0
109198	6030407O03Rik	No_BS	No_BS	No_BS	0.0383537	0	0.0751516	0	0.0233119	0.0281052	0.0415512	0.0201915	0.0787709	0.0224575	0.0246815	0.0716037	0	0	0.0256881	0	0	0	0.0378351	0.017139	0.0468379	0.0395809	0.00856271	0
102465179	Mir6351	No_BS	No_BS	No_BS	0	0	0	0	0	0	0	0	0	0	0	0	0	0	0	0.420856	0	0	0	0	0	0	0	0.140285
21961	Tns1	chr1-13 (+18051)	Merged-chr1-74125337-2 (-890), Merged-chr1-74111513-2 (+12934), Merged-chr1-74106406-2 (+18041)	Merged-chr1-74106409-2 (+18038)	1.58343	0.767401	0.950478	2.17	1.30149	0.990209	0.855843	0.583706	0.474406	0.929186	0.628776	0.616674	0.828578	0.404235	0.515183	2.40341	1.6282	0.864288	1.10044	1.48724	0.637985	0.724879	0.582665	1.63197
435626	Rufy4	No_BS	Merged-chr1-74125337-2 (-242)	No_BS	0.0739244	0.0337587	0.0386267	0.280596	0.197702	0.108342	0.0800874	0.0311343	0.0202435	0.121199	0.152231	0.0920079	0.0556794	0.132686	0	0.48157	0.262729	0.120262	0.04877	0.195547	0.0438217	0.121813	0.0627885	0.288187
12765	Cxcr2	No_BS	No_BS	No_BS	4.40373	2.94139	0.741308	3.88752	2.4145	0.482388	3.87325	1.86425	0.80809	3.69503	2.62939	0.480292	3.98579	2.61922	0.51692	1.8758	1.93844	0.677016	2.69548	2.26147	2.18186	2.26824	2.37397	1.49709
227288	Cxcr1	No_BS	No_BS	No_BS	0	0	0	0	0	0	0	0	0	0	0	0	0	0	0	0	0	0	0	0	0	0	0	0
100316687	Mir1928	No_BS	No_BS	No_BS	0	0	0	0	0	0	0	0	0	0	0	0	0	0	0	0	0	0	0	0	0	0	0	0
76709	Arpc2	No_BS	No_BS	No_BS	83.7593	115.501	118.313	78.785	101.82	94.7373	97.6774	117.952	102.632	86.8942	113.898	99.1076	104.046	152.524	99.1337	91.7824	121.91	107.13	105.858	91.7808	106.087	99.9666	118.568	106.941
227289	Gpbar1	No_BS	No_BS	No_BS	0	0.119485	0.136715	0.0630566	0	0.153386	0.113384	0.0734644	0.191066	0	0.224502	0.173681	0	0	0.0467316	0.168342	0.103322	0	0.0854002	0.0721476	0.125972	0.132728	0.0155772	0.0905549
227290	Aamp	No_BS	No_BS	No_BS	99.3617	109.841	120.599	91.9068	102.401	117.282	85.8943	93.9093	101.359	72.0694	82.6258	94.8292	82.4711	97.974	105.315	74.0808	74.9746	107.69	109.934	103.863	93.7209	83.1748	95.2533	85.5819
56695	Pnkd	chr1-120 (+10764)	Merged-chr1-74295810-2 (+10765)	No_BS	8.93041	8.61831	8.70095	9.70278	9.28462	8.50373	8.81968	7.48078	7.59323	8.52832	7.65833	8.29017	7.45099	7.51483	8.55229	6.83301	6.95567	7.83931	8.74989	9.16371	7.96456	8.15894	7.83937	7.20933
69660	Tmbim1	chr1-120 (+8552)	Merged-chr1-74332731-1 (-28370), Merged-chr1-74295810-2 (+8551)	No_BS	7.77804	9.22144	6.74103	6.74547	7.81873	4.75703	6.88703	10.615	6.55366	6.44613	10.0685	6.1063	8.39324	13.769	5.55012	6.92908	11.5328	5.23172	7.9135	6.44041	8.01855	7.54029	9.23744	7.89787
241112	Catip	chr1-220 (-603)	Merged-chr1-74332731-1 (-29377)	No_BS	0.70686	0.788229	2.08294	0.430832	0.419648	0.915499	0.908262	0.571176	1.71059	0.23101	0.23273	0.368277	0.742887	0.442582	1.82767	0.475941	0.24343	0.579423	1.19268	0.588659	1.06334	0.277339	1.00438	0.432931
18173	Slc11a1	No_BS	No_BS	No_BS	0.719531	0.633211	2.64352	0.50125	0.455564	0.944683	0.876957	0.552418	2.13456	0.315984	0.270104	0.615686	0.649206	0.518898	1.68672	0.452091	0.429165	0.873845	1.33209	0.633832	1.18798	0.400591	0.951608	0.585034
227292	Ctdsp1	No_BS	No_BS	No_BS	12.3295	13.2949	14.8707	12.0872	11.328	12.6544	14.3413	15.6804	12.8954	12.3698	13.5468	12.806	14.0328	15.871	13.3993	14.9789	14.1127	12.2115	13.4984	12.0232	14.3057	12.9075	14.4344	13.7677
387219	Mir26b	No_BS	No_BS	No_BS	0.406323	0	0.530777	0	0.493938	0	0	0	0.556339	0.95167	0	0	0	0	0	0	0	0	0.312367	0.164646	0.185446	0.317223	0	0
22349	Vil1	chr1-3 (+14788)	Merged-chr1-74424155-2 (+14779)	No_BS	0.587259	0.240351	0.303958	0.330455	0.32327	0.438457	0.384132	0.723331	0.84959	0.168687	0.385045	0.537843	0.469443	0.76711	0.549176	0.34754	0.525065	0.450643	0.377189	0.364061	0.652351	0.363859	0.595243	0.441083
319651	Usp37	No_BS	No_BS	No_BS	11.2837	10.8493	15.837	11.9283	11.2372	14.5114	11.5641	10.0615	14.3457	13.6693	10.7669	14.0917	11.4505	8.50389	12.614	13.1838	9.62811	13.3191	12.6567	12.5589	11.9904	12.8427	10.8561	12.0437
58184	Rqcd1	chr1-3 (-81894)	Merged-chr1-74424155-2 (-81903)	No_BS	39.9624	45.6478	49.1635	41.4963	41.5477	45.906	46.8111	45.4283	44.2627	47.381	45.7443	46.9478	45.8182	45.4046	43.6012	43.6293	40.8197	45.2305	44.9245	42.9833	45.5007	46.691	44.9413	43.2265
18802	Plcd4	No_BS	No_BS	No_BS	0.177059	0.16424	0.274657	0.0900087	0.215237	0.048655	0.203808	0.454415	0.33334	0.142552	0.398795	0.123959	0.208374	0.397251	0.163059	0.133498	0.305895	0.165024	0.205318	0.117967	0.330521	0.221768	0.256228	0.201472
77264	Zfp142	No_BS	No_BS	No_BS	4.03061	3.94724	3.8281	4.3486	3.79279	2.93326	3.8158	5.31457	2.94922	4.42784	4.21193	3.67039	3.91228	3.01042	4.16082	3.88097	4.07952	2.65691	3.93532	3.69155	4.02653	4.10338	3.69451	3.53914
66821	Bcs1l	No_BS	No_BS	No_BS	10.6465	13.3162	8.66247	9.75304	13.2072	6.92295	10.1956	11.8411	7.03984	7.63814	9.61047	6.91938	10.6223	14.9306	7.13069	7.25461	11.8916	7.24125	10.8751	9.96106	9.69218	8.056	10.8945	8.79582
57751	Rnf25	No_BS	Merged-chr1-74601286-2 (+111)	No_BS	16.6499	21.568	16.2283	17.5797	22.0853	14.0661	20.7703	22.5221	15.2833	18.924	22.3008	16.741	21.5679	26.6454	18.9875	17.3532	23.0537	17.6334	18.1487	17.9104	19.5252	19.322	22.4003	19.3468
269209	Stk36	No_BS	Merged-chr1-74601286-2 (-159)	No_BS	0.640072	0.625278	0.577527	0.709657	0.754025	0.454532	0.722029	0.639199	0.542095	0.710934	0.687917	0.5749	0.745513	0.558356	0.592226	0.963208	0.592811	0.483068	0.614292	0.639405	0.634441	0.657917	0.632031	0.679696
67534	Ttll4	No_BS	No_BS	No_BS	17.2972	12.7942	9.77001	15.412	11.7178	6.27213	15.572	16.7161	8.39479	14.2364	13.0438	7.96451	17.1567	12.4623	10.3233	12.6865	13.0918	5.68071	13.2871	11.134	13.561	11.7483	13.3141	10.4863
104086	Cyp27a1	No_BS	Merged-chr1-74713341-2 (-233)	No_BS	0.639583	0.417251	0.429676	1.07346	0.710853	0.669543	0.673107	1.039	1.07588	0.813199	0.564462	0.864271	0.584958	0.9137	0.709876	1.14633	0.902022	1.41209	0.495503	0.817953	0.929329	0.74731	0.736178	1.15348
241113	Prkag3	No_BS	No_BS	No_BS	0.170736	0.0556924	0.0955848	0.220431	0.0741256	0.10724	0.0132122	0.115566	0.100188	0.0142818	0.0784805	0.197323	0.0803734	0.0625414	0.0816814	0.132409	0.180595	0.214931	0.107338	0.133932	0.0763222	0.0966951	0.0748654	0.175978
22420	Wnt6	No_BS	No_BS	No_BS	0.334018	0.286002	0.545407	0.377333	0.243625	0.416101	0.180932	0.545122	0.343004	0.19558	0.988763	0.748307	0.188685	0.406821	0.357945	0.141031	0.296777	0.181129	0.388476	0.345686	0.356353	0.644217	0.317817	0.206313
22409	Wnt10a	chr1-121 (+11679), chr1-46 (+33527)	Merged-chr1-74803181-2 (+11665), Merged-chr1-74809214-1 (+17698), Merged-chr1-74825099-1 (+33583)	No_BS	0	0.0603216	0.0460133	0.382005	0.342558	0.154872	0.0190805	0.0741762	0.0241146	0.433129	0.702699	0.504171	0.0331635	0.13548	0.141553	0.169973	0.486843	0.214889	0.0354449	0.293145	0.0391238	0.546666	0.103399	0.290568
12570	Cdk5r2	chr1-121 (-51834), chr1-46 (-29986), chr1-141 (-87)	Merged-chr1-74803181-2 (-51848), Merged-chr1-74809214-1 (-45815), Merged-chr1-74825099-1 (-29930), Merged-chr1-74854972-2 (-57), Merged-chr1-74857330-1 (+2301)	No_BS	0.638637	0.67078	0.450493	2.51643	1.92534	0.954693	0.844093	0.685876	0.262327	2.483	2.79465	1.19229	0.541145	0.818774	0.188205	4.08326	3.78289	1.88742	0.586637	1.79882	0.597432	2.15665	0.516041	3.25119
260298	Fev	No_BS	Merged-chr1-74857330-1 (+28089)	No_BS	0	0.0533201	0	0	0.0851617	0	0	0.122937	0	0	0.150275	0	0	0.269448	0	0	0.18443	0	0.0177734	0.0283872	0.0409791	0.0500917	0.089816	0.0614765
12958	Cryba2	chr1-108 (-5728)	No_BS	No_BS	0	0.0547642	0	0.173406	0	0	0	0	0	0.11235	0	0	0	0	0	0	0	0	0.0182547	0.0578019	0	0.03745	0	0
723900	Mir375	No_BS	No_BS	No_BS	0	0	0	0	0	0	0	0	0	0	0	0	0	0	0	0	0	0	0	0	0	0	0	0
241116	Ccdc108	chr1-108 (+36728)	No_BS	No_BS	0.0181204	0	0.00789018	0.0218349	0	0	0.0130874	0.0381583	0	0.0212203	0.0388697	0	0.022747	0.0154877	0	0	0.017889	0	0.00867019	0.0072783	0.0170819	0.02003	0.0127449	0.005963
16147	Ihh	No_BS	No_BS	No_BS	0.0565262	0.467871	0.0369198	0.0383138	0.171787	0.0621327	0.214335	1.01179	0.0386979	0.0661963	0.363759	0.0527653	0.0931332	1.6487	0.0189298	0.119334	0.6557	0.134105	0.187106	0.0907445	0.421607	0.160907	0.58692	0.303047
75570	Nhej1	No_BS	No_BS	No_BS	5.63377	6.43188	7.46601	6.30901	6.45156	9.93203	5.66118	5.75992	10.285	6.11948	5.88481	7.77408	5.57321	6.33309	8.80444	5.76214	6.5694	10.5709	6.51055	7.5642	7.23538	6.59279	6.90358	7.63414
22626	Slc23a3	No_BS	No_BS	No_BS	0.0671282	0.0191595	0.0657668	0.0455	0.0612022	0.0983818	0	0	0.0689341	0.0393061	0	0.0835493	0.110601	0.0645471	0.0449605	0.0404905	0.0331355	0.113756	0.0506848	0.0683613	0.022978	0.0409518	0.0733696	0.0624605
69171	Cnppd1	No_BS	No_BS	No_BS	6.21877	5.91885	4.00409	6.03056	5.56627	2.90246	8.43177	10.7581	5.21593	8.361	9.57863	5.21234	8.21826	12.0644	6.42091	9.63249	10.2862	5.60904	5.38057	4.8331	8.13525	7.71732	8.90119	8.50925
227298	Fam134a	No_BS	No_BS	No_BS	8.63437	8.20726	7.70479	9.06297	7.04452	6.43121	10.7664	10.9258	8.48229	9.386	9.70089	8.93134	9.93973	11.0202	11.2376	11.039	11.9898	9.37837	8.18214	7.5129	10.0582	9.33941	10.7325	10.8024
68818	Zfand2b	No_BS	No_BS	No_BS	11.672	13.2345	8.78703	10.933	12.8637	10.9496	11.2337	11.8137	9.71987	8.31337	10.8134	9.06712	10.5636	12.885	11.7887	8.7884	10.8405	11.354	11.2312	11.5821	10.9224	9.39797	11.7457	10.3276
74104	Abcb6	No_BS	No_BS	No_BS	7.27725	7.63599	5.76833	7.71545	7.31476	6.66155	7.28435	9.89403	7.01351	8.20503	9.59349	7.35732	7.38362	11.2019	8.42317	7.84143	9.63721	7.056	6.89385	7.23059	8.06396	8.38528	9.0029	8.17821
245860	Atg9a	No_BS	No_BS	No_BS	4.68405	4.30113	2.94402	4.48397	4.20154	2.61283	4.67369	5.89701	3.20095	5.02251	5.06531	3.31789	4.47333	5.19664	3.72863	4.79849	5.23858	2.59931	3.9764	3.76611	4.59055	4.46857	4.4662	4.21213
52231	Ankzf1	No_BS	No_BS	No_BS	8.59474	7.7309	8.52027	7.93117	6.44225	7.6507	7.93728	6.83183	8.68253	7.35984	6.41265	8.32944	7.46287	6.70722	7.50847	6.9259	6.50627	5.63397	8.28197	7.34137	7.81721	7.36731	7.22619	6.35538
74577	Glb1l	chr1-173 (+832)	No_BS	No_BS	0.520414	0.457029	0.771326	0.506499	0.523136	0.572031	0.672224	0.769237	0.781067	0.750084	0.656916	0.635262	0.612457	0.577389	0.831176	0.651954	0.760772	0.556272	0.582923	0.533889	0.740842	0.680754	0.673674	0.656333
20872	Stk16	chr1-173 (-892)	No_BS	No_BS	9.34474	9.24336	8.38646	8.71385	9.58206	6.56894	10.6648	11.7294	6.85321	10.1359	9.83897	7.36904	10.9583	11.1727	8.21769	8.40465	10.2465	7.12401	8.99152	8.28828	9.74912	9.11462	10.1162	8.59173
22145	Tuba4a	No_BS	No_BS	Merged-chr1-75218615-1 (+638)	69.6806	94.5902	97.6818	57.3176	80.6361	73.4483	84.6572	93.9677	92.2051	54.9655	76.9508	80.2979	84.8002	91.4056	89.2836	95.4047	104.996	101.215	87.3175	70.4673	90.2767	70.7381	88.4965	100.539
381272	A630095N17Rik	No_BS	No_BS	No_BS	0.135088	0.154225	0.41175	0.0813898	0.0547389	0.32997	0.0487834	0.0948237	0.308271	0.105465	0	0.112089	0.211974	0.173192	0.120637	0.271608	0.0889085	0	0.233688	0.155366	0.150626	0.0725181	0.168601	0.120172
56812	Dnajb2	No_BS	Merged-chr1-75251755-2 (+15290)	No_BS	2.49084	2.49901	2.11283	2.53368	2.34632	1.94379	2.83868	3.1903	2.02265	1.99515	2.26212	1.90572	2.64967	3.11047	2.59993	2.06828	2.72516	1.92959	2.36756	2.2746	2.68388	2.05433	2.78669	2.24101
19275	Ptprn	No_BS	Merged-chr1-75251755-2 (+12453)	No_BS	3.67358	1.41659	1.64638	2.04849	1.56775	1.30302	3.78931	6.17226	3.23731	2.97481	3.29456	2.54147	6.04343	5.28596	5.85011	3.94842	4.89985	2.80799	2.24552	1.63975	4.39963	2.93694	5.7265	3.88542
19711	Resp18	No_BS	No_BS	No_BS	0	0.555355	0.0635437	0.0879239	0.827868	0.142584	0	0.307309	0	0	0.563468	0.181631	0.183193	0.561287	0	0.0586827	0.432208	0.131893	0.2063	0.352792	0.102436	0.248366	0.24816	0.207594
13437	Dnpep	No_BS	No_BS	Merged-chr1-75344835-2 (-27198)	36.7027	47.0893	45.6493	36.1211	49.6222	49.1868	36.7439	45.0917	48.3337	30.6982	39.426	45.2834	35.725	55.497	47.6194	38.0677	47.1147	54.7378	43.1471	44.9767	43.3898	38.4692	46.2805	46.6401
13346	Des	No_BS	No_BS	Merged-chr1-75344835-2 (-15494)	4.15802	3.03606	2.3846	3.8698	3.79438	2.31205	4.27272	6.09839	3.24001	3.19345	4.46689	2.86106	4.4452	6.78997	2.9736	45.403	44.6535	23.2658	3.19289	3.32541	4.53704	3.50713	4.73626	37.7741
100503248	Gm15179	No_BS	No_BS	No_BS	0	0	0.0667397	0.0923462	0	0	0	0	0	0.0598313	0	0	0	0	0	0	0	0.0692631	0.0222466	0.0307821	0	0.0199438	0	0.0230877
11790	Speg	No_BS	No_BS	No_BS	0.666132	0.277747	0.208082	0.633421	0.320387	0.2377	0.448688	0.558052	0.384655	0.457879	0.443582	0.324423	0.556262	0.467857	0.360804	1.19142	1.06936	0.537911	0.383987	0.397169	0.463799	0.408628	0.461641	0.932895
69080	Gmppa	No_BS	No_BS	No_BS	18.0372	21.3924	16.0327	17.9352	22.8333	15.1057	16.627	22.1569	14.3909	16.3054	21.5566	15.3883	17.365	26.0518	14.1397	16.9604	23.6086	12.8086	18.4875	18.6248	17.7249	17.7501	19.1855	17.7925
241118	Asic4	No_BS	No_BS	No_BS	0.026066	0	0	0.0117785	0.0158433	0	0	0.0137226	0	0.0152626	0	0	0.024541	0.0167092	0.0349165	0.0157225	0.0257331	0	0.00868868	0.00920726	0.0045742	0.00508754	0.0253889	0.0138186
74241	Chpf	chr1-122 (+1672)	No_BS	No_BS	10.4733	9.51931	9.13477	9.31083	9.42223	8.54316	9.68096	10.8814	7.89365	7.77663	8.53301	7.52091	9.30774	10.6763	10.5257	9.22162	13.1643	10.6959	9.70914	9.09207	9.48532	7.94351	10.1699	11.0273
319998	Tmem198	chr1-122 (-1981)	No_BS	No_BS	0.284519	0.415055	0.557498	0.185707	0.23058	0.231659	0.445235	0.565861	0.476134	0.333193	0.284814	0.275426	0.342282	0.385037	0.381125	0.533918	0.671005	0.964294	0.419024	0.215982	0.495743	0.297811	0.369481	0.723073
98733	Obsl1	chr1-174 (-268)	No_BS	Merged-chr1-75506619-2 (-258)	8.28421	3.48516	3.41693	12.0957	5.78473	4.99156	8.52741	7.97255	4.98294	9.55422	9.11368	7.68088	7.58537	7.06013	5.11554	23.4752	18.5964	12.7482	5.0621	7.624	7.16097	8.78293	6.58701	18.2733
16322	Inha	chr1-174 (-448)	No_BS	Merged-chr1-75506619-2 (-458)	0.25968	0.242564	0.400894	0.618713	0.315675	0.449779	0.255754	0.27342	0.646463	0.331751	0.455755	0.293822	0.355617	0.272395	0.505967	0.939805	0.769092	1.40818	0.301046	0.461389	0.391879	0.360443	0.377993	1.03902
71728	Stk11ip	No_BS	No_BS	No_BS	8.95588	7.03163	8.76413	8.31787	6.88444	7.94801	8.15818	7.75752	7.75417	7.73899	5.98268	8.12859	7.5712	5.22452	7.1607	7.84134	6.97531	6.41726	8.25055	7.71677	7.88996	7.28342	6.65214	7.07797
20536	Slc4a3	chr1-73 (+116566)	Merged-chr1-75589124-2 (+42858), Merged-chr1-75662843-1 (+116577)	No_BS	1.70315	0.887868	0.954944	1.43379	0.803581	0.752252	1.28065	1.50667	1.38427	1.32057	1.42132	1.23896	1.39849	1.04691	1.43762	1.80131	2.096	1.38114	1.18199	0.99654	1.39053	1.32695	1.29434	1.75948
620079	Gm17751	No_BS	No_BS	No_BS	0	0	0	0	0	0	0	0	0	0	0	0	0	0	0	0	0	0	0	0	0	0	0	0
102465175	Mir6343	No_BS	No_BS	No_BS	0	0	0	0	0	0	0	0	0	0	0	0	0	0	0	0	0	0	0	0	0	0	0	0
13838	Epha4	No_BS	No_BS	Merged-chr1-78181997-1 (-666909)	1.97575	1.14652	2.23156	4.20744	1.93735	3.65553	2.30603	2.63772	2.28672	4.61473	3.26642	4.34752	2.37401	2.55404	1.94474	6.02453	3.93876	4.77245	1.78461	3.26677	2.41016	4.07622	2.29093	4.91191
102465180	Mir6352	No_BS	No_BS	No_BS	0	0	0	0	0	0	0	0	0	0	0	0	0	0	0	0	0	0	0	0	0	0	0	0
18505	Pax3	No_BS	No_BS	Merged-chr1-78181997-1 (+14841)	0.0267871	0.0203879	0.0233278	0.0403477	0.0217088	0.0261724	0.0580406	0.0188029	0.0122256	0.0627393	0.0459683	0.044453	0.0504397	0.0228952	0	0.387779	0.044075	0.169469	0.0235009	0.0294096	0.0296897	0.0510536	0.024445	0.200441
433323	Sgpp2	No_BS	Merged-chr1-78310708-2 (+362)	No_BS	0.190051	0.19725	0.304686	0.312286	0.241533	0.481106	0.121666	0.154628	0.201078	0.313613	0.27796	0.387068	0.138265	0.188281	0.335584	0.187585	0.196152	0.222515	0.230662	0.344975	0.159124	0.326214	0.22071	0.202084
23874	Farsb	No_BS	No_BS	No_BS	73.9584	95.9432	106.757	66.0526	88.6326	82.7941	75.0989	82.197	86.662	63.7354	79.2736	79.3863	77.0336	95.7786	70.8087	53.2009	74.0076	68.2688	92.2197	79.1598	81.3193	74.1318	81.207	65.1591
68393	Mogat1	No_BS	No_BS	No_BS	0	0.032695	0	0.0517629	0	0	0	0.0904599	0	0.0335373	0.073717	0	0	0.183579	0	0.0345478	0.169634	0.0388241	0.0108983	0.0172543	0.0301533	0.0357514	0.0611931	0.0810019
74205	Acsl3	chr1-175 (-208)	Merged-chr1-78657622-2 (-203)	No_BS	15.0391	13.2366	12.1985	16.5784	16.5069	14.096	12.2481	10.9003	13.6599	13.6595	13.3692	17.053	13.2948	12.6672	12.79	29.0809	22.6935	27.7375	13.4914	15.7271	12.2694	14.6939	12.9174	26.504
195434	Utp14b	chr1-175 (-823)	Merged-chr1-78657622-2 (-818)	No_BS	5.10124	3.4567	3.73984	6.16263	3.6912	5.04776	4.52085	3.67211	3.68237	5.43547	4.00855	4.80503	5.25202	3.28118	3.24234	10.4764	5.97822	5.22203	4.09926	4.96719	3.95844	4.74968	3.92518	7.22553
57814	Kcne4	No_BS	No_BS	Merged-chr1-79317392-2 (+500443)	0	0	0	0	0	0	0	0	0	0	0	0	0	0	0	0	0.0138434	0	0	0	0	0	0	0.00461448
20254	Scg2	No_BS	No_BS	Merged-chr1-79317392-2 (+122698)	0.0138984	0.17454	0.0181553	0	0.28722	0.0203692	0.0301142	0.11707	0.0190297	0.016276	0.0894393	0	0.0130852	0.0534559	0	0.0167665	0.109767	0.0188418	0.0688646	0.10253	0.0554046	0.0352385	0.0221804	0.0484585
252903	Ap1s3	No_BS	No_BS	No_BS	5.90836	6.44374	8.32984	5.45902	5.31378	6.14238	5.69839	6.29684	4.6368	5.55499	6.69243	5.47041	6.03754	6.45098	5.63022	5.31674	5.64322	6.15391	6.89398	5.63839	5.54401	5.90595	6.03958	5.70462
69368	Wdfy1	No_BS	No_BS	No_BS	10.2499	12.4631	8.45088	9.17718	11.6317	7.85998	12.9697	16.1459	10.3225	11.2655	12.8243	9.38326	12.5335	21.886	9.54926	10.8272	16.3755	9.41602	10.3879	9.5563	13.146	11.1577	14.6563	12.2062
69163	Mrpl44	No_BS	No_BS	No_BS	28.9591	35.0552	32.4747	25.9743	33.2281	30.0363	29.0348	31.5128	25.5373	27.5226	29.8423	32.0283	29.5711	40.2369	26.0562	26.6841	28.9963	30.0857	32.163	29.7462	28.695	29.7977	31.9547	28.5887
20720	Serpine2	No_BS	No_BS	No_BS	7.09237	6.79235	5.99352	7.63997	6.06787	5.49279	8.19347	15.6077	9.29668	7.73492	12.7838	8.11611	9.2566	20.9438	12.1345	8.21129	14.4848	10.139	6.62608	6.40021	11.0326	9.54495	14.1116	10.945
241128	Fam124b	No_BS	No_BS	No_BS	0	0.0137771	0.0472914	0.021812	0	0	0	0.0127061	0.016523	0.0423962	0	0	0	0	0	0.0436737	0.0357405	0.0327197	0.0203562	0.00727067	0.00974303	0.0141321	0	0.0373779
26554	Cul3	No_BS	No_BS	Merged-chr1-80403634-1 (-63154)	42.6595	46.4346	55.383	44.4029	44.1873	61.4039	44.578	38.5357	48.7944	47.426	43.792	48.336	44.9988	37.1023	45.2768	54.8545	44.2118	59.5437	48.1591	49.998	43.9694	46.518	42.4593	52.87
72208	1700016L21Rik	No_BS	No_BS	No_BS	0	0	0	0	0	0	0	0	0	0	0	0	0	0	0	0	0	0	0	0	0	0	0	0
210293	Dock10	No_BS	No_BS	Merged-chr1-80403634-1 (+354919)	0.0411596	0.0261058	0.0597405	0.0247985	0.0222377	0.0268101	0.0396365	0.0481527	0.0438323	0.0910463	0.0294302	0.011384	0.0258343	0.0117265	0.0245044	0.0386193	0.0225744	0.0309996	0.0423353	0.0246154	0.0438738	0.0439535	0.0206884	0.0307311
241134	Nyap2	chr1-221 (+667317)	No_BS	No_BS	0	0	0	0.00636221	0.0171157	0	0	0	0	0	0	0	0	0	0	0	0.00694994	0	0	0.00782596	0	0	0	0.00231665
102466629	Mir6344	No_BS	No_BS	No_BS	0	0	0	0	0	0	0	0	0	0	0	0	0	0	0	0	0	0	0	0	0	0	0	0
16367	Irs1	No_BS	No_BS	No_BS	0.245	0.124793	0.123093	0.337235	0.100804	0.0828617	0.326678	0.353211	0.263203	0.423749	0.358987	0.243946	0.560695	0.227123	0.201961	0.595665	0.4056	0.199285	0.164295	0.173634	0.314364	0.342227	0.329927	0.400183
76867	Rhbdd1	No_BS	No_BS	No_BS	4.35624	4.71106	3.36149	3.87878	3.8432	3.34037	4.40081	6.03824	3.34721	4.5203	5.33463	3.2943	4.81089	6.72791	2.96692	4.27956	6.20595	2.79087	4.14293	3.68745	4.59542	4.38308	4.83524	4.42546
12829	Col4a4	No_BS	No_BS	No_BS	0.00884669	0.00504997	0.00577818	0.0119927	0.0268857	0.0194483	0.0191685	0	0.0121129	0.0103601	0.0227722	0	0.00416455	0.00567102	0	0.00533616	0.0131006	0.0119933	0.00655828	0.0194422	0.0104271	0.0110441	0.00327852	0.0101433
12828	Col4a3	No_BS	No_BS	No_BS	0	0.0229006	0.0104811	0.0145025	0.00487684	0.0117592	0.00869249	0.00844811	0.00549295	0.0046981	0.0103267	0.00499316	0.0113312	0.0102867	0.00537395	0.00483967	0.0198028	0.00543871	0.0111272	0.0103795	0.00754452	0.00667266	0.0089973	0.010027
75734	Mff	No_BS	No_BS	No_BS	33.0375	35.096	51.9862	32.0833	34.2406	62.7222	35.0896	31.0028	60.0428	33.658	34.8937	48.0799	34.4695	36.9192	52.3171	34.2924	31.3724	60.8558	40.0399	43.0154	42.0451	38.8772	41.2353	42.1735
66261	Tm4sf20	No_BS	No_BS	No_BS	0	0.0262343	0	0.0415343	0	0	0	0.0241949	0	0	0.0295751	0	0	0.0294606	0.092344	0	0.0226856	0.0311523	0.00874478	0.0138448	0.00806496	0.00985836	0.0406015	0.0179459
15463	Agfg1	No_BS	No_BS	No_BS	36.9816	40.8882	52.0193	31.9095	36.6982	45.7445	36.2837	32.9104	45.0427	33.7028	30.2246	38.9163	35.0563	34.7939	39.7015	29.9635	28.401	35.3888	43.2964	38.1174	38.0789	34.2813	36.5172	31.2511
80721	Slc19a3	No_BS	No_BS	No_BS	0.429686	0.344716	0.637146	0.73467	1.04468	1.22544	0.377439	0.366828	0.906342	0.815991	0.508186	0.953962	0.41548	0.357331	0.544469	0.896618	0.596171	1.19652	0.470516	1.0016	0.550203	0.75938	0.439093	0.896437
20297	Ccl20	No_BS	No_BS	No_BS	0.0861284	0.245824	0.0562544	0	0	0.063114	0.0933088	0.136028	0.235854	0.0504314	0	0	0.486535	0.331267	0.749921	0.051951	0.340114	0.0583813	0.129402	0.021038	0.155064	0.0168105	0.522574	0.150149
71227	Daw1	No_BS	No_BS	No_BS	0.0207059	0	0	0.0187128	0	0	0	0	0	0	0	0	0	0	0	0	0	0	0.00690198	0.00623761	0	0	0	0
77629	Sphkap	chr1-223 (-298829), chr1-222 (-162169)	No_BS	No_BS	0	0.018165	0.048497	0.0239658	0.0322364	0.0233188	0.0229833	0.00558429	0.0145236	0.024844	0.0273043	0.0264042	0.00998672	0.00679965	0	0.0191944	0.0157078	0.0359504	0.0222207	0.026507	0.0143637	0.0261842	0.00559546	0.0236176
98496	Pid1	chr1-223 (+577616), chr1-222 (+714276)	Merged-chr1-84694962-2 (-410317)	No_BS	2.66769	3.20823	3.75544	3.15992	3.13272	3.24544	2.52532	3.88601	3.35117	3.4577	3.86678	3.23967	3.12122	4.43291	3.93776	3.40566	3.6436	3.47609	3.21045	3.17936	3.25417	3.52138	3.83063	3.50845
102465181	Mir6353	No_BS	No_BS	No_BS	0	0	0	0	0	0	0	0	0	0	0	0	0	0	0	0	0	0	0	0	0	0	0	0
227325	Dner	No_BS	Merged-chr1-84694962-2 (+1259)	No_BS	0.218712	0.44511	0.633512	0.739074	1.01725	1.28216	0.185436	0.250309	0.468721	0.701568	0.685373	1.25455	0.25068	0.231637	0.382139	1.26187	0.938778	0.902403	0.432445	1.01283	0.301489	0.880497	0.288152	1.03435
100628595	Mir5126	No_BS	No_BS	No_BS	0	0	0	0	0	0	0	0	0	0	0	0	0	0	0	0	0	0	0	0	0	0	0	0
14897	Trip12	chr1-142 (-1269)	No_BS	No_BS	88.0469	75.5814	101.956	93.7395	82.0341	103.778	76.1195	67.8821	83.6833	87.8877	66.0402	86.0302	74.476	56.0938	68.3926	77.9786	57.5165	67.6613	88.5281	93.184	75.895	79.986	66.3208	67.7188
66153	Fbxo36	chr1-142 (+732), chr1-41 (+29201)	No_BS	Merged-chr1-84869057-2 (+29216)	2.72462	2.10294	4.01031	2.94789	3.07888	4.0494	3.70011	3.31325	5.62211	3.3705	3.35855	5.06281	4.19105	4.03434	5.3461	2.77765	2.99291	4.16194	2.94596	3.35872	4.21182	3.93062	4.52383	3.31083
71781	Slc16a14	chr1-41 (+66083)	Merged-chr1-85080807-1 (-145682), Merged-chr1-84988839-1 (-53714)	Merged-chr1-85088440-1 (-153315), Merged-chr1-85087716-1 (-152591), Merged-chr1-84869057-2 (+66068)	0.352873	0.318933	0.307304	0.664389	0.428963	0.301679	0.41415	0.495392	0.301972	0.688735	0.6434	0.439194	0.484499	0.150802	0.374211	0.567591	0.319336	0.378721	0.32637	0.46501	0.403838	0.590443	0.336504	0.421883
381287	A530032D15Rik	No_BS	Merged-chr1-85244886-1 (-135033), Merged-chr1-85235718-1 (-125865), Merged-chr1-85080807-1 (+29046), Merged-chr1-84988839-1 (+121014)	Merged-chr1-85262363-1 (-152510), Merged-chr1-85088440-1 (+21413), Merged-chr1-85087716-1 (+22137)	0.0981179	0.0224035	0.179439	0.053204	0.0954199	0.0575198	0	0.0206619	0.107475	0	0.0505129	0.0244239	0.0554263	0	0.0525731	0.0236731	0.019373	0.07981	0.0999867	0.0687145	0.0427121	0.0249789	0.0359998	0.040952
665378	Gm7609	No_BS	No_BS	No_BS	1.35063	1.9091	1.34424	1.45312	1.69398	1.06828	0.975485	1.21893	0.55772	1.90807	1.21407	0.773803	1.33216	0.989481	0.918969	1.34486	0.867755	0.697532	1.53465	1.40513	0.91738	1.29864	1.0802	0.970048
620078	C130026I21Rik	No_BS	Merged-chr1-85495074-1 (-224531), Merged-chr1-85325599-1 (-55056), Merged-chr1-85244886-1 (+25657), Merged-chr1-85235718-1 (+34825)	Merged-chr1-85584224-1 (-313681), Merged-chr1-85495084-1 (-224541), Merged-chr1-85281164-1 (-10621), Merged-chr1-85262363-1 (+8180)	0.385502	0.140036	0.412019	0.269214	0.17041	0.282492	0.0379674	0.0553499	0.3119	0.143644	0.180422	0.152665	0.247464	0.0898616	0.258198	0.169111	0.0345981	0.213798	0.312519	0.240705	0.135072	0.15891	0.198508	0.139169
109032	Sp110	No_BS	Merged-chr1-85495074-1 (+103743), Merged-chr1-85325599-1 (+273218)	Merged-chr1-85584224-1 (+14593), Merged-chr1-85495084-1 (+103733), Merged-chr1-85281164-1 (+317653)	3.81998	2.52065	6.56941	3.16722	2.51355	5.23894	0.626461	0.977848	3.59884	1.25175	1.08253	2.00645	1.66626	0.853685	3.73213	1.98705	1.28013	3.82462	4.30334	3.6399	1.73438	1.44691	2.08402	2.36393
434484	Sp140	No_BS	Merged-chr1-85625034-1 (+24331)	Merged-chr1-85617729-2 (+17026), Merged-chr1-85625010-1 (+24307)	1.35806	1.37092	2.20351	1.58907	1.21645	1.42466	1.33189	0.97836	1.46799	1.27231	1.65589	1.29883	1.22476	0.769756	1.1298	1.77627	1.04434	1.27907	1.64416	1.41006	1.25941	1.40901	1.04144	1.36656
20684	Sp100	No_BS	Merged-chr1-85625034-1 (-25016)	Merged-chr1-85617729-2 (-32321), Merged-chr1-85625010-1 (-25040)	0.0480132	0.0365433	0.0209064	0	0.0778216	0.0234557	0.0173387	0.0337024	0	0.056227	0.0411968	0	0.045204	0.0205187	0	0	0.0316	0	0.0351543	0.0337591	0.0170137	0.0324746	0.0219076	0.0105333
319997	A630001G21Rik	No_BS	No_BS	No_BS	0.214075	0.285136	0.396163	0.564285	0.455413	0.287599	0.30923	0.413237	0.512947	0.605854	0.711773	0.821532	0.520671	0.480302	0.406247	0.516505	0.845366	0.532066	0.298458	0.435766	0.411805	0.713053	0.469073	0.631312
102466882	Mir8096	No_BS	No_BS	No_BS	0	0	0	0	0	0	0	0	0	0	0	0	0	0	0	0	0	0	0	0	0	0	0	0
77762	9930111H07Rik	No_BS	No_BS	No_BS	0	0.0960541	0.21981	0.152073	0.35797	0.18496	0	0.13288	0.287995	0.147793	0.216572	0.366507	0.237638	0.107867	0.169054	0.0507487	0.124591	0.171091	0.105288	0.231668	0.140292	0.243624	0.171519	0.115477
12283	Cab39	No_BS	No_BS	No_BS	34.8738	32.3016	43.9881	35.9689	29.5109	49.6051	32.1686	29.9915	49.8026	36.561	36.0758	48.4385	33.5778	28.1174	45.9478	39.3731	33.8811	54.2148	37.0545	38.3616	37.3209	40.3584	35.881	42.4897
64294	Itm2c	No_BS	No_BS	No_BS	19.8795	20.1242	16.6733	19.724	21.2413	19.9569	19.1706	20.9134	19.2753	19.1439	21.3692	18.5834	21.1263	28.2652	24.0008	22.1498	27.3917	24.8221	18.8923	20.3074	19.7864	19.6988	24.4641	24.7878
71141	4933407L21Rik	No_BS	No_BS	No_BS	0	0	0	0	0	0	0	0	0	0.0352317	0	0	0	0.0385708	0	0	0	0	0	0	0	0.0117439	0.0128569	0
227326	Gpr55	No_BS	No_BS	No_BS	0	0	0	0	0	0	0	0	0	0	0	0	0	0	0	0	0.0267423	0	0	0	0	0	0	0.0089141
70060	Spata3	No_BS	Merged-chr1-86018529-2 (-3413)	No_BS	0.021559	0.0246131	0	0.0194838	0.0262077	0.0315964	0	0	0	0.0252472	0	0	0	0	0	0.0260079	0.0212837	0.0292271	0.0153907	0.0257626	0	0.00841572	0	0.0255062
72792	2810459M11Rik	No_BS	No_BS	No_BS	0.300687	0.295934	0.0406329	0.290484	0.252085	0.0911752	0.359453	0.589524	0.113573	0.26713	0.386998	0.167763	0.292856	0.438672	0.180557	0.175114	0.276374	0.126508	0.212418	0.211248	0.354183	0.273964	0.304028	0.192665
70247	Psmd1	No_BS	No_BS	No_BS	114.379	122.505	98.7675	111.853	120.603	99.5559	116.939	121.458	91.8762	107.4	127.456	106.33	120.47	132.104	91.8324	103.202	116.29	88.6106	111.884	110.671	110.091	113.729	114.802	102.701
15559	Htr2b	No_BS	No_BS	No_BS	0.050006	0.03806	0.0217741	0.0903851	0.0202629	0.146576	0.054175	0.0702025	0.0228228	0.0390405	0.0643601	0.0414924	0.0313868	0.0213703	0.0223283	0.0201084	0.082279	0.0225974	0.0366134	0.0857412	0.0490667	0.0482976	0.0250285	0.0416616
78795	Armc9	chr1-110 (+44423)	No_BS	No_BS	2.86498	2.78322	2.59228	2.71985	2.94756	2.54243	3.68758	2.9543	3.122	3.17042	2.7909	3.09147	3.34695	3.56357	2.71988	2.87753	2.73757	2.53886	2.74683	2.73661	3.25463	3.01759	3.21013	2.71799
227327	B3gnt7	chr1-110 (-103988)	Merged-chr1-86300275-2 (-2946), Merged-chr1-86301458-2 (-1763)	No_BS	46.7421	45.4169	31.8159	53.465	53.6822	37.139	60.213	61.2668	31.8903	84.6482	72.287	55.0785	61.4373	50.4903	41.3081	96.3185	75.1304	64.2334	41.325	48.0954	51.1234	70.6712	51.0786	78.5608
17975	Ncl	No_BS	Merged-chr1-86359321-1 (+134)	Merged-chr1-86361044-2 (-1589)	352.193	291.154	387.707	342.254	258.956	338.831	373.838	282.159	343.667	350.528	283.924	358.544	375.181	227.478	307.22	297.436	241.388	324.067	343.685	313.347	333.221	330.999	303.293	287.63
100303740	Snora75	No_BS	No_BS	No_BS	0.893211	1.69958	4.27824	2.95985	1.08581	3.92722	1.29024	1.88094	4.07662	2.09203	2.68241	3.33513	1.12127	1.52687	3.9883	1.07754	2.93935	5.24728	2.29034	2.65763	2.41593	2.70319	2.21215	3.08805
102465895	Gm24148	No_BS	No_BS	No_BS	1.87959	2.95056	6.13823	1.69867	1.71366	2.75469	0.763609	2.22642	3.53862	3.02657	2.11673	1.75453	2.21203	0.903659	3.14723	0.8503	3.01533	1.9111	3.65613	2.05567	2.17622	2.29928	2.08764	1.92557
80828	Snord82	No_BS	No_BS	No_BS	0	0.579856	0.663471	0.459015	0	1.48875	0	0.534778	0.695423	0	0	0	0.478188	0.651166	0	0.612716	0.501418	0.688556	0.414442	0.649254	0.410067	0	0.376451	0.600897
319336	C130036L24Rik	No_BS	No_BS	No_BS	1.09123	0.809783	1.10474	0.690335	0.729593	1.15948	0.502438	0.689382	0.709705	0.638957	0.561786	0.848856	0.693486	0.48966	0.877049	0.263284	0.323189	0.665713	1.00192	0.859804	0.633842	0.6832	0.686732	0.417395
14767	Nmur1	No_BS	No_BS	No_BS	0.0283559	0	0	0	0	0.0415578	0.0307199	0.0298562	0	0.0332069	0.0364954	0.0352924	0	0	0	0	0	0	0.00945197	0.0138526	0.020192	0.0349982	0	0
71863	1700019O17Rik	chr1-42 (+8225), chr1-95 (+77119), chr1-43 (+83260)	Merged-chr1-86434645-1 (+8316), Merged-chr1-86509620-2 (+83291)	Merged-chr1-86434583-2 (+8254)	0	0.0229112	0.05243	0	0.0243955	0	0.0217413	0	0	0	0	0	0	0	0	0.0242096	0	0.0272062	0.0251137	0.00813185	0.00724711	0	0	0.0171386
19231	Ptma	chr1-42 (-92182), chr1-95 (-23288), chr1-43 (-17147), chr1-111 (+5374)	Merged-chr1-86434645-1 (-92091), Merged-chr1-86509620-2 (-17116), Merged-chr1-86526449-2 (-287)	Merged-chr1-86434583-2 (-92153)	2398.36	2816.48	2268.63	2638.57	2562.76	2443.27	2961.71	2129.3	2535.86	2615.96	2546.67	2806.86	3001.42	2516.97	2631.01	2821.35	2463.52	3263.31	2494.49	2548.2	2542.29	2656.5	2716.47	2849.39
18582	Pde6d	chr1-111 (+50437)	No_BS	No_BS	27.2947	30.0421	14.9974	27.7258	29.1433	17.336	33.2023	27.64	22.6051	27.001	29.7156	18.8163	33.2017	38.4808	22.2848	28.4632	32.5352	23.9683	24.1114	24.735	27.8158	25.1776	31.3224	28.3223
26895	Cops7b	No_BS	Merged-chr1-86612250-2 (+29346)	No_BS	23.67	24.0187	26.107	23.4063	23.5423	26.2503	22.8593	21.907	24.0789	18.3829	20.5221	24.4506	20.9297	23.3206	26.9374	19.6651	20.0208	23.9461	24.5986	24.3996	22.9484	21.1185	23.7292	21.2107
18159	Nppc	No_BS	Merged-chr1-86612250-2 (+58323)	No_BS	0.132582	0	0.0432975	0.239639	0.201462	0.437195	0	0.174496	0.136148	0.0776314	0.213298	0.165014	0.156031	0.127484	0.133199	0.119956	0.16361	0.0898692	0.0586263	0.292765	0.103548	0.151981	0.138904	0.124479
208718	Dis3l2	chr1-83 (+54363)	No_BS	No_BS	7.55882	8.34363	7.498	7.4612	8.92391	8.30056	8.90877	8.77299	7.69505	8.38001	8.14451	9.1503	8.18303	9.38369	6.85722	8.2252	9.22571	7.29423	7.80015	8.22855	8.45894	8.55827	8.14131	8.24838
11650	Alppl2	chr1-83 (+331761)	No_BS	No_BS	0.179883	0.112018	0.384512	0.0591155	0.0795165	0.191733	0.0885815	0.0344364	0.246296	0.0383011	0	0.162826	0.0153962	0.0419311	0.197149	0.0197276	0.0322883	0.0886777	0.225471	0.110122	0.123105	0.0670424	0.0848255	0.0468979
76768	Alpi	No_BS	No_BS	No_BS	0.0147786	0	0	0	0.0179652	0	0	0	0	0	0	0	0.0139139	0	0	0	0	0	0.00492619	0.00598841	0	0	0.00463797	0
11648	Akp3	No_BS	No_BS	No_BS	0.020558	0	0	0	0	0.0301294	0	0.0216458	0.0281481	0	0	0.025587	0	0	0	0	0.0202955	0	0.00685268	0.0100431	0.016598	0.00852899	0	0.00676516
13599	Ecel1	No_BS	No_BS	No_BS	0.33554	0.23777	0.347628	0.292785	0.154718	0.339145	0.376049	0.219286	0.506948	0.176147	0.134024	0.316815	0.326802	0.222509	0.418471	0.237286	0.331255	0.3294	0.306979	0.262216	0.367428	0.208995	0.322594	0.299314
69453	Prss56	No_BS	No_BS	No_BS	0.0691095	0.11835	0.0902772	0.1093	0.231032	0.227892	0.0748711	0.127341	0.260218	0.121399	0.111184	0.430076	0.0975991	0.221507	0.18515	0.0416855	0.119397	0.163958	0.0925788	0.189408	0.154143	0.220886	0.168085	0.108347
11447	Chrnd	No_BS	No_BS	No_BS	0.0349452	0	0.0304324	0.115799	0.113281	0.0512149	0	0.085853	0.047847	0.368311	0.419777	0.275459	0.0109669	0.059736	0.0624139	1.09607	0.712977	0.52112	0.0217925	0.0934315	0.0445667	0.354515	0.0443723	0.776722
11449	Chrng	No_BS	No_BS	No_BS	0.0179789	0.0205259	0.0939428	0.0487449	0.0437113	0.0526991	0.0584334	0.0757208	0.0246168	0.0631639	0.115698	0.0671308	0.067708	0	0	0.715739	0.141994	0.219363	0.0441492	0.0483851	0.0529236	0.0819977	0.0225693	0.359032
26987	Eif4e2	No_BS	No_BS	No_BS	29.0008	44.447	37.9385	26.9377	39.8463	33.2177	33.0814	32.4096	24.6232	26.0913	30.3077	28.0526	31.1509	36.1476	25.958	24.2396	27.9663	26.0618	37.1288	33.3339	30.0381	28.1505	31.0855	26.0892
98363	Efhd1	No_BS	No_BS	No_BS	0.937583	1.57284	1.0248	0.553361	1.23279	0.785201	1.90712	1.41027	1.04795	0.336116	0.394029	0.690635	1.38714	1.12845	0.615149	0.877152	0.528919	0.856023	1.17841	0.857118	1.45511	0.473593	1.04358	0.754031
227331	Gigyf2	chr1-37 (+514)	Merged-chr1-87327532-2 (+529)	Merged-chr1-87327519-2 (+516)	24.332	19.5949	16.8743	23.9736	20.0822	14.0315	22.3537	21.6112	16.0154	24.0929	21.4168	16.5792	21.6684	16.6924	14.2023	21.9895	18.9332	11.8053	20.2671	19.3624	19.9935	20.6963	17.5211	17.576
100040591	Kcnj13	No_BS	No_BS	No_BS	0.0256023	0.0876876	0.0668881	0.115689	0.0622457	0.300178	0.0277367	0.188698	0.105164	0.0899465	0.0659027	0.0637303	0.120522	0.0328238	0	0.0617712	0.227478	0.0347086	0.0600593	0.159371	0.1072	0.0731932	0.0511152	0.107986
73234	3110079O15Rik	No_BS	No_BS	No_BS	0.523295	0.0853467	0	0.270242	0.0908761	0.109562	0.0809888	0	0	0.175091	0.288645	0.0930435	0.211148	0	0.300418	0.0901833	0.147604	0.101346	0.202881	0.156893	0.0269963	0.185593	0.170522	0.113044
53972	Ngef	No_BS	No_BS	No_BS	0.244947	0.116519	0.0666608	0.101461	0.074441	0.0598315	0.276425	0.247161	0.195639	0.119521	0.157629	0.127027	0.317096	0.274783	0.177729	0.27087	0.181364	0.0276725	0.142709	0.0785777	0.239742	0.134726	0.256536	0.159969
23956	Neu2	No_BS	No_BS	No_BS	0	0	0	0	0.0208568	0	0	0.03613	0	0.0401848	0	0	0	0	0	0	0.0169381	0	0	0.00695227	0.0120433	0.0133949	0	0.00564604
16331	Inpp5d	No_BS	No_BS	No_BS	11.0114	8.41284	12.8772	12.3588	9.80777	11.8346	7.79391	9.89361	12.7029	8.52313	9.27719	13.94	7.18134	6.39092	8.67222	7.48109	7.75797	6.69154	10.7672	11.3337	10.1301	10.5801	7.41482	7.3102
77040	Atg16l1	No_BS	No_BS	No_BS	20.2881	22.4802	34.4329	19.6308	20.8339	34.9706	20.6734	21.9562	33.697	18.2643	18.801	30.2795	20.1543	19.0206	31.8904	16.5873	17.7773	29.8894	25.7337	25.1451	25.4422	22.4483	23.6884	21.418
100217415	Scarna6	No_BS	No_BS	No_BS	0.139264	0.158993	0.181919	0.251718	0.50788	0.408205	0.150874	0	0.190681	0	0.537718	0	0.262232	0.178546	0	0.336006	0.137486	0.188798	0.160059	0.389268	0.113852	0.179239	0.146926	0.220763
20215	Sag	No_BS	No_BS	No_BS	0.0804132	0.0229512	0.0262608	0.0181682	0	0	0.0217793	0.021167	0	0	0.0258739	0.025021	0.0189271	0.0257737	0	0.0485037	0	0.0272537	0.0432084	0.00605607	0.0143154	0.016965	0.0149003	0.0252525
227333	Dgkd	No_BS	No_BS	No_BS	19.5737	14.3206	11.5207	21.5377	16.3102	11.6187	16.9605	16.9051	11.3114	20.8552	18.5721	14.7062	16.6981	14.6276	12.0251	18.7177	17.8925	10.9942	15.1383	16.4889	15.059	18.0445	14.4503	15.8681
227334	Usp40	No_BS	No_BS	No_BS	3.17698	2.74439	2.95342	3.57576	2.78793	2.40899	3.1603	3.35192	2.68646	3.60636	2.94335	2.43394	3.29082	3.07356	2.34977	3.93448	3.19413	2.3957	2.95826	2.92423	3.06623	2.99455	2.90472	3.17477
394430	Ugt1a10	No_BS	No_BS	No_BS	0	0	0	0	0	0	0	0.0112168	0	0	0	0	0	0	0	0	0	0	0	0	0.00373894	0	0	0
394434	Ugt1a9	No_BS	No_BS	No_BS	0	0	0	0	0	0	0	0	0	0	0	0	0	0.0137684	0	0	0	0	0	0	0	0	0.00458948	0
394432	Ugt1a7c	No_BS	No_BS	No_BS	0	0	0	0	0.0127458	0	0.0113591	0.0220795	0	0.0736721	0	0	0	0.0134424	0	0.0252973	0.0310532	0	0	0.00424861	0.0111462	0.0245574	0.0044808	0.0187835
394435	Ugt1a6b	No_BS	No_BS	No_BS	0	0	0	0	0	0	0.0326357	0	0	0	0	0	0.0141809	0	0	0.0181704	0	0	0	0	0.0108786	0	0.00472696	0.0060568
94284	Ugt1a6a	No_BS	No_BS	No_BS	0	0	0	0	0	0	0	0.011013	0.0286425	0	0	0.0130182	0	0	0	0	0	0	0	0	0.0132185	0.0043394	0	0
394433	Ugt1a5	No_BS	No_BS	No_BS	0	0	0	0	0	0	0	0	0	0	0	0	0	0	0	0	0	0	0	0	0	0	0	0
22236	Ugt1a2	No_BS	No_BS	No_BS	0	0	0	0	0	0	0	0	0	0	0	0	0	0	0	0	0	0	0	0	0	0	0	0
15504	Dnajb3	No_BS	Merged-chr1-88205654-2 (+94)	No_BS	0.882964	1.00805	0.842876	1.38111	1.07336	0.647027	1.2877	0.893926	0.976465	1.39195	1.00529	0.972154	1.18301	1.0014	0.955311	1.8026	1.07285	1.42721	0.911296	1.03383	1.0527	1.12313	1.04657	1.43422
394436	Ugt1a1	No_BS	No_BS	No_BS	0	0	0	0	0	0	0	0	0	0	0.0137663	0	0.0100702	0	0	0	0	0.0145004	0	0	0	0.00458876	0.00335674	0.00483347
100040766	Mroh2a	No_BS	No_BS	Merged-chr1-88233855-2 (+6835)	0.00460377	0	0	0	0	0	0	0	0.00630349	0.0107827	0	0	0.00433441	0	0.00616693	0.00555381	0.00908995	0.00624125	0.00153459	0	0.00210116	0.00359424	0.00350045	0.00696167
381280	Hjurp	No_BS	No_BS	Merged-chr1-88233855-2 (+43778)	0.69165	0.523306	0.56669	0.784116	0.731337	0.359882	0.496586	0.564498	0.285784	0.771632	0.674224	0.458437	0.570267	0.487969	0.449541	0.898563	0.7111	0.405024	0.593882	0.625112	0.448956	0.634764	0.502592	0.671562
78605	6430706D22Rik	No_BS	No_BS	No_BS	0	0	0	0	0	0	0	0	0	0	0	0	0	0	0	0	0	0	0	0	0	0	0	0
212427	A730008H23Rik	No_BS	No_BS	No_BS	0	0	0	0	0	0	0	0	0	0	0	0	0	0	0	0	0	0	0	0	0	0	0	0
171382	Trpm8	No_BS	No_BS	No_BS	0	0	0	0	0	0	0	0	0	0	0	0.0111826	0	0	0	0	0	0	0	0	0	0.00372755	0	0
75396	Spp2	No_BS	No_BS	No_BS	0	0	0.0518575	0	0	0	0	0.0417987	0	0	0	0	0	0.0508957	0.0531774	0	0	0	0.0172858	0	0.0139329	0	0.034691	0
14659	Glrp1	No_BS	Merged-chr1-88674585-2 (-164699)	No_BS	0	0	0	0	0	0	0	0	0.0241639	0	0	0	0	0.0226261	0.0236404	0	0	0	0	0	0.00805464	0	0.0154222	0
100503197	Gm19589	No_BS	No_BS	No_BS	0.0395166	0.0300764	0.0172067	0.0357128	0.0640499	0.0193049	0.042811	0.0554766	0.0541062	0.0308512	0	0	0.0372045	0.0675504	0	0.0317809	0.0260079	0	0.0289332	0.0396892	0.0507979	0.0102837	0.0349183	0.0192629
320982	Arl4c	chr1-48 (-222119)	Merged-chr1-88839750-2 (-137529), Merged-chr1-88674585-2 (+27636)	Merged-chr1-89011643-1 (-309422)	7.27151	3.74816	3.08281	8.41319	4.5944	3.84162	6.18897	5.61153	6.02139	12.0338	12.8445	9.85233	11.3801	6.97795	6.20591	7.93163	7.13566	5.0765	4.70083	5.6164	5.94063	11.5769	8.18797	6.7146
78650	Platr5	No_BS	No_BS	No_BS	1.16092	1.32538	0.758253	1.57376	1.67586	1.80777	1.1791	1.45154	1.98692	1.95432	2.98833	2.79951	1.77613	1.48838	0.874746	1.1379	1.21773	1.27875	1.08152	1.6858	1.53919	2.58072	1.37975	1.21146
73475	1700067G17Rik	No_BS	No_BS	No_BS	0	0	0	0	0	0	0	0	0	0	0	0	0	0	0	0.138191	0	0	0	0	0	0	0	0.0460638
98402	Sh3bp4	chr1-48 (-146075)	Merged-chr1-88839750-2 (-230665)	Merged-chr1-89011643-1 (-58772), Merged-chr1-89408183-2 (+337768)	11.8103	9.69384	9.07725	11.3703	9.75033	9.46751	9.23961	10.0986	10.0551	10.8906	12.078	12.9789	10.0835	10.0783	10.0011	8.31479	10.6847	7.47008	10.1938	10.196	9.79779	11.9825	10.0543	8.8232
77331	C030007H22Rik	No_BS	No_BS	No_BS	0	0	0	0	0	0	0	0	0	0	0	0	0	0	0	0	0	0	0	0	0	0	0	0
347722	Agap1	chr1-57 (+33104), chr1-96 (+173675), chr1-112 (+415873)	Merged-chr1-89492467-2 (+37656), Merged-chr1-89870659-2 (+415848)	Merged-chr1-89408183-2 (-46628), Merged-chr1-89628488-2 (+173677)	4.09144	3.28825	2.81122	4.56418	3.74668	2.50419	4.54579	4.32689	2.84789	6.70793	4.33332	4.18151	4.6021	3.11032	2.91657	9.03656	6.07835	4.12458	3.39697	3.60502	3.90686	5.07425	3.543	6.41316
74403	4933400F21Rik	No_BS	No_BS	No_BS	0.019129	0	0	0	0	0.0140176	0	0.0100706	0	0	0.01231	0	0	0	0	0	0.0283271	0.0129664	0.00637635	0.00467252	0.00335686	0.00410333	0	0.0137645
14472	Gbx2	chr1-36 (-65584)	Merged-chr1-89998878-2 (-65588)	Merged-chr1-89998874-2 (-65584)	28.608	26.1137	21.7516	16.1791	15.9763	12.1425	32.7177	25.6915	13.2346	15.7903	8.9279	8.83581	28.0048	16.4329	22.8928	11.2491	8.40382	7.81832	25.4911	14.766	23.8813	11.1847	22.4435	9.15707
208372	Asb18	chr1-36 (+15703)	Merged-chr1-89998878-2 (+15699)	Merged-chr1-89998874-2 (+15703)	0.0245993	0.0280842	0	0	0	0	0.0266502	0	0.0673629	0	0	0	0	0.031538	0	0.0296757	0	0.0333489	0.0175612	0	0.0313377	0	0.0105127	0.0210082
74918	Iqca	No_BS	No_BS	Merged-chr1-90156782-1 (-3381)	0	0.0122836	0.0421645	0.029171	0.0261587	0.0315373	0	0.0226573	0	0.0126	0.0138478	0.0669565	0	0.0137942	0.0288251	0	0.0106219	0.0291725	0.0181494	0.0289557	0.00755242	0.0311348	0.0142064	0.0132648
12778	Ackr3	chr1-97 (+201180)	Merged-chr1-90405141-1 (+201161)	Merged-chr1-90405163-2 (+201183)	1.84677	2.58447	3.7159	6.98557	8.32815	10.237	1.16171	1.05065	3.89485	6.90668	5.65466	11.4555	1.2199	0.611012	2.63342	9.28877	4.36681	12.72	2.71571	8.5169	2.03574	8.00563	1.48811	8.79187
108679	Cops8	chr1-97 (-198265)	Merged-chr1-90405141-1 (-198284)	Merged-chr1-90405163-2 (-198262)	33.1695	49.015	40.7586	37.5809	45.3791	36.8851	40.3403	41.791	35.922	38.2953	43.5107	43.196	40.8268	46.9942	34.2903	37.2337	41.2561	37.1424	40.981	39.9484	39.3511	41.6673	40.7038	38.5441
12835	Col6a3	No_BS	No_BS	No_BS	0.00955746	0.0400085	0	0.00863749	0.0232366	0.00466907	0.065577	0.043607	0.0130861	0.17908	0.0656048	0.00396514	0.113978	0.0490131	0.00426753	0.161417	0.069193	0.00863792	0.016522	0.0121811	0.0407567	0.0828833	0.055753	0.0797492
171531	Mlph	No_BS	No_BS	No_BS	0.0924286	0.0879353	0.0402462	0.111376	0.0749059	0.0112885	0.0917897	0.129759	0.0527306	0.144321	0.0892199	0.105452	0.0942725	0.0888746	0.0825412	0.176545	0.15208	0.125304	0.0735367	0.0658566	0.0914264	0.112998	0.0885628	0.15131
623503	Prlh	No_BS	No_BS	No_BS	0	0	0	0	0	0	0	0	0	0	0	0	0	0	0	0	0	0	0	0	0	0	0	0
19329	Rab17	No_BS	No_BS	No_BS	0.442788	0.626839	0.439592	0.2401	0.366021	0.33745	0.805901	0.727298	0.776021	0.352606	0.319138	0.661324	0.683686	1.13537	1.04391	0.384597	0.629472	0.816381	0.503073	0.314523	0.76974	0.444356	0.954322	0.61015
16978	Lrrfip1	No_BS	No_BS	No_BS	4.46828	2.73258	3.04806	5.11974	3.74302	3.26109	4.50201	5.43922	4.56173	6.3243	6.9506	5.80084	5.33925	5.06556	4.64818	10.759	10.1464	8.70725	3.41631	4.04128	4.83432	6.35858	5.01766	9.87087
329207	Rbm44	No_BS	No_BS	No_BS	1.35424	1.07509	1.83932	2.22082	1.94061	2.37906	1.63231	1.2748	2.30857	2.02702	1.50056	2.46687	1.34255	1.49476	1.24941	2.09892	2.50566	1.99397	1.42288	2.18016	1.73856	1.99815	1.36224	2.19952
51801	Ramp1	No_BS	No_BS	No_BS	0.0228574	0.0130477	0.0447876	0.0309858	0.0277861	0.0669986	0.0371444	0.0481335	0.0156482	0.0133838	0.0147092	0.0142244	0.0322801	0.0293046	0.0306184	0.0827228	0.0676964	0.0774683	0.0268976	0.0419235	0.0336421	0.0141058	0.0307343	0.0759625
67921	Ube2f	No_BS	No_BS	No_BS	20.2461	23.5193	25.6529	21.0911	23.5952	24.1018	25.2831	27.0802	24.9801	23.2646	28.2101	24.158	27.0297	29.9202	23.5565	23.5071	29.0182	26.6572	23.1394	22.9294	25.7812	25.2109	26.8355	26.3942
50880	Scly	No_BS	No_BS	No_BS	10.3127	12.7027	7.19567	10.2959	12.955	8.60061	11.6302	12.572	8.4207	10.226	11.279	8.19988	11.4332	14.4053	9.60084	12.5164	15.0166	10.2469	10.0704	10.6172	10.8743	9.90164	11.8131	12.5933
227357	Espnl	No_BS	No_BS	No_BS	0.0317323	0.0144911	0.024871	0.0458846	0.0385747	0.0186025	0.0206267	0.0467759	0.0086896	0.0371609	0.040841	0.0394948	0.0537764	0.00813658	0.00850135	0.0995298	0.0313271	0.0258114	0.0236981	0.0343539	0.0253641	0.0391656	0.0234714	0.0522228
70788	Klhl30	No_BS	No_BS	No_BS	0.217289	0.130564	0.0448172	0.144696	0.0417067	0.100564	0.210625	0.0481654	0.21922	0.0937489	0.014719	0.170806	0.37685	0.102634	0.107235	0.317314	0.056451	0.0310078	0.13089	0.0956557	0.159337	0.0930912	0.195573	0.134924
227358	Fam132b	chr1-229 (+3172)	No_BS	No_BS	1.64406	0.784402	0.865458	2.2398	1.92399	1.1508	1.26274	0.852605	0.873541	1.63795	1.737	1.72555	1.51321	0.959516	1.10114	2.57537	2.15601	1.87953	1.09797	1.77153	0.996294	1.70017	1.19129	2.20363
67444	Ilkap	chr1-229 (+29181)	No_BS	No_BS	32.9722	38.7096	41.7851	40.9557	45.5448	42.8842	41.5196	36.6839	36.0197	48.4583	47.5058	46.2226	40.3132	38.1618	37.911	63.3498	55.4565	67.7685	37.8223	43.1282	38.0744	47.3956	38.7953	62.1916
67086	1700020N18Rik	No_BS	No_BS	No_BS	0	0	0	0	0	0	0	0	0	0.0739414	0	0	0.0594457	0	0	0.0761695	0.187	0	0	0	0	0.0246471	0.0198152	0.0877233
55927	Hes6	chr1-12 (-1022), chr1-74 (-140)	Merged-chr1-91414255-2 (-1033), Merged-chr1-91413379-2 (-157)	Merged-chr1-91414285-2 (-1063)	11.021	6.2025	7.57003	107.621	61.7349	55.5086	20.9646	23.0447	17.8528	163.662	161.19	114.662	18.0486	25.2409	21.9712	307.539	256.196	278.23	8.26449	74.9547	20.6207	146.505	21.7536	280.655
18627	Per2	No_BS	No_BS	No_BS	0.248514	0.364782	0.123669	0.411753	0.374029	0.251483	0.198719	0.274123	0.145828	0.512764	0.51785	0.213568	0.189407	0.280681	0.134743	0.549629	0.537411	0.216582	0.245655	0.345755	0.206223	0.414727	0.20161	0.434541
74019	Traf3ip1	No_BS	No_BS	No_BS	6.0786	4.9682	5.3108	6.05532	4.90622	3.41306	5.44148	5.62097	4.21546	5.56999	4.85155	4.29861	5.63934	4.099	4.91724	5.73782	4.85143	4.45476	5.45253	4.79153	5.09264	4.90671	4.88519	5.01467
65247	Asb1	No_BS	Merged-chr1-91536515-1 (-4050)	No_BS	2.13868	2.48062	2.51883	1.79917	1.79085	2.42584	1.82401	2.37761	2.14949	1.71855	2.14497	1.94683	2.04569	2.51587	2.49913	1.65369	2.00468	1.8738	2.37938	2.00528	2.11704	1.93679	2.35356	1.84406
13345	Twist2	No_BS	No_BS	No_BS	0.210594	0.150268	0.103162	0.0237904	0	0.0385804	0.399265	0.19402	0.252303	0.308277	0.169403	0.131055	0.570035	0.404994	0.246837	0.254053	0.129941	0.178437	0.154675	0.0207903	0.281863	0.202912	0.407289	0.187477
208727	Hdac4	chr1-230 (-284027), chr1-49 (-217339), chr1-98 (-200256), chr1-113 (-165620)	Merged-chr1-92365699-2 (-217306), Merged-chr1-92179922-1 (-31529)	Merged-chr1-92365736-2 (-217343), Merged-chr1-92222184-2 (-73791)	6.81995	5.22737	3.43088	7.80127	6.17266	3.06656	7.01862	7.5403	2.90086	9.37075	6.83954	4.1733	6.58578	4.68047	3.34229	7.47747	5.46234	2.1601	5.1594	5.68016	5.81993	6.79453	4.86951	5.0333
67273	Ndufa10	chr1-230 (+41440), chr1-49 (+108128), chr1-98 (+125211), chr1-113 (+159847)	Merged-chr1-92365699-2 (+108161), Merged-chr1-92179922-1 (+293938)	Merged-chr1-92365736-2 (+108124), Merged-chr1-92222184-2 (+251676)	66.5896	88.9055	64.7074	69.7323	88.6576	51.6641	83.654	88.4909	56.4023	81.6614	90.8513	67.5547	80.5792	100.022	52.7697	74.8862	82.6887	52.8634	73.4008	70.018	76.1824	80.0225	77.7903	70.1461
102465542	Mir6900	No_BS	No_BS	No_BS	0	0	0	0	0	0	0	0	0	0	0	0	0	0	0	0	0	0	0	0	0	0	0	0
259040	Olfr1416	No_BS	No_BS	No_BS	0	0	0	0	0	0	0	0	0	0	0	0	0	0	0	0	0	0	0	0	0	0	0	0
258228	Olfr1415	No_BS	No_BS	No_BS	0	0	0	0	0	0	0	0	0	0	0	0	0	0	0	0	0	0	0	0	0	0	0	0
259041	Olfr1414	No_BS	No_BS	No_BS	0	0	0	0	0	0	0	0	0	0	0	0	0	0	0	0	0	0	0	0	0	0	0	0
259039	Olfr1413	No_BS	No_BS	No_BS	0	0	0	0	0	0	0	0	0	0	0	0	0	0	0	0	0	0	0	0	0	0	0	0
258274	Olfr1412	No_BS	No_BS	No_BS	0	0	0	0	0	0	0	0	0	0	0	0	0	0	0	0	0	0	0	0	0	0	0	0
258483	Olfr1411	No_BS	No_BS	No_BS	0	0	0	0	0	0	0	0	0	0	0	0	0	0	0	0	0	0	0	0	0	0	0	0
258484	Olfr1410	No_BS	No_BS	No_BS	0	0	0	0	0	0	0	0	0	0	0	0	0	0	0	0	0	0	0	0	0	0	0	0
257890	Olfr12	No_BS	No_BS	No_BS	0	0	0	0	0	0	0	0	0.0421845	0	0	0	0.0290069	0	0	0	0	0	0	0	0.0140615	0	0.00966898	0
66915	Myeov2	No_BS	No_BS	No_BS	44.6413	84.517	42.1971	44.7342	68.7345	54.0346	55.5727	50.3278	44.0963	41.1855	52.7664	31.499	54.7434	74.297	48.737	39.4379	49.5861	50.3779	57.1185	55.8345	49.9989	41.817	59.2591	46.4673
260301	Otos	No_BS	No_BS	No_BS	0.0490589	0	0.0640853	0	0	0	0	0	0.0671716	0	0	0	0.0461886	0.0628967	0	0.0591828	0.145297	0	0.0377147	0	0.0223905	0	0.0363618	0.06816
14733	Gpc1	No_BS	Merged-chr1-92848708-1 (+17063)	No_BS	13.0099	9.29141	7.32881	16.8367	12.6947	10.8161	12.6092	10.1048	7.90809	17.1258	14.2164	11.993	13.8782	8.86334	9.39093	21.0904	12.767	13.5509	9.87671	13.4492	10.2074	14.4451	10.7108	15.8028
387167	Mir149	No_BS	No_BS	No_BS	0	0	0	0	0	0	0	0	0	0	0	0	0	0	0	0	0	0	0	0	0	0	0	0
241158	Ankmy1	No_BS	Merged-chr1-92848708-1 (+54198)	No_BS	0.106499	0.0486342	0.0973827	0.0673731	0.0258925	0.0624329	0.0461509	0.0672801	0.0291636	0.0249435	0.0411206	0.0927853	0.040107	0.0409614	0.0142659	0.0256952	0.0420554	0.0577513	0.0841718	0.0518995	0.0475315	0.0529498	0.0317781	0.0418339
67446	Dusp28	No_BS	No_BS	No_BS	2.61753	3.54369	3.9034	3.20294	3.04115	5.29599	2.66008	2.97553	4.59884	2.63129	2.5043	4.58403	3.18407	3.05886	4.93362	2.76647	3.1558	6.06077	3.35487	3.84669	3.41149	3.23987	3.72552	3.99435
108657	Rnpepl1	No_BS	No_BS	No_BS	5.19369	3.82754	4.02318	6.71711	5.47086	4.06405	5.61437	8.37625	4.4659	7.67928	7.94244	5.37503	6.0133	7.47459	6.56134	7.14291	9.27862	5.91628	4.34814	5.41734	6.15218	6.99892	6.68308	7.44594
100037260	9430060I03Rik	No_BS	No_BS	No_BS	0.0206564	0.141496	0.0809498	0.0186681	0.050221	0	0.089514	0.065248	0.169697	0.0967607	0.0265857	0.102838	0.0972392	0.0529657	0.13835	0.0747572	0.0815704	0.0840105	0.081034	0.022963	0.108153	0.0753946	0.096185	0.0801127
23830	Capn10	No_BS	No_BS	No_BS	9.7358	9.63484	9.69124	9.16753	8.46408	10.8554	9.81916	10.8324	11.5222	7.56341	7.49354	10.4589	9.69739	10.5119	15.4375	8.57334	9.23222	13.7032	9.68729	9.49567	10.7246	8.50528	11.8823	10.5029
64095	Gpr35	No_BS	No_BS	No_BS	0.0153568	0.0262985	0.0702117	0.0693931	0.0746727	0.0450133	0.0499113	0.0565928	0	0.017984	0.0691773	0.0286701	0.043375	0.0393769	0.0514277	0.0463147	0.0303214	0.0312284	0.037289	0.0630264	0.0355014	0.0386105	0.0447265	0.0359548
208760	Aqp12	No_BS	No_BS	No_BS	0	0	0	0	0	0	0	0	0	0	0	0	0	0	0	0	0	0	0	0	0	0	0	0
16560	Kif1a	No_BS	No_BS	No_BS	3.15449	0.867171	0.596414	2.64453	0.802256	0.51098	2.69351	3.34324	2.05159	2.93101	2.78856	1.87525	4.4627	2.43188	3.24145	5.74824	4.95404	2.76846	1.53936	1.31926	2.69611	2.53161	3.37868	4.49025
11611	Agxt	No_BS	No_BS	No_BS	0.0667176	0	0.0290509	0.0200985	0.0811038	0.0651867	0	0	0.03045	0.0260438	0	0.0553588	0.020938	0	0.0297903	0.0536571	0.0219552	0.0602986	0.0319228	0.055463	0.01015	0.0271342	0.0169094	0.0453036
71874	2310007B03Rik	No_BS	Merged-chr1-93194635-2 (-33687), Merged-chr1-93190997-1 (-30049)	No_BS	0.833462	0.350565	0.210109	0.0528586	0.10665	0.128579	0.14257	0.384895	0.440454	0.0171236	0.0564581	0.236587	0.702098	0.374931	0.842238	0.141117	0.129919	0.218053	0.464712	0.0960295	0.32264	0.10339	0.639755	0.163029
208777	Sned1	No_BS	Merged-chr1-93272669-1 (+36828)	No_BS	1.46672	0.819626	0.564707	1.24182	0.919648	0.418606	1.08721	1.78004	0.33823	1.30179	1.12271	0.393927	0.973904	0.672998	0.713509	0.949888	1.13553	0.188376	0.950352	0.860026	1.0685	0.939476	0.786804	0.757932
102465543	Mir6901	No_BS	No_BS	No_BS	0	0	0	0	0	0	0	0	0	0	0	0	0	0	0	0	0	0	0	0	0	0	0	0
69821	Mterf4	chr1-99 (-99)	Merged-chr1-93305958-1 (-43), Merged-chr1-93272669-1 (+33246)	No_BS	7.01168	9.19443	10.1256	6.7228	7.7257	7.83311	8.62337	8.84166	9.08687	6.08825	7.58958	6.53544	8.92617	9.123	9.35056	7.00068	7.81698	7.9237	8.77723	7.4272	8.85063	6.73776	9.13325	7.58045
269224	Pask	No_BS	No_BS	No_BS	10.9772	7.6642	10.9992	10.8413	9.10394	11.2132	9.62648	10.0591	11.1409	10.9668	9.22198	11.5296	9.69977	7.65524	11.5955	10.7845	10.6306	10.0248	9.88021	10.3861	10.2755	10.5728	9.65015	10.4799
66385	Ppp1r7	No_BS	No_BS	No_BS	19.1738	23.7035	20.2176	18.832	22.6761	16.5723	22.4112	22.9458	15.1588	21.5461	22.0006	16.6155	21.3722	25.4912	15.0711	19.7203	20.385	14.2145	21.0316	19.3601	20.1719	20.054	20.6448	18.1066
102465544	Mir6902	No_BS	No_BS	No_BS	0	0	0	0	0	0	0	0	0	0	0.694552	0	0	0	0	0	0	0	0	0	0	0.231517	0	0
102466630	Mir6345	No_BS	No_BS	No_BS	0.269824	0	0	0	0	0	0	0	0	0	0	0	0	0	0	0	0	0	0.0899414	0	0	0	0	0
404545	Ano7	No_BS	No_BS	No_BS	0.189058	0.166786	0.224514	0.17086	0.146252	0.0503781	0.12103	0.190013	0.211794	0.130828	0.143784	0.117653	0.145634	0.198315	0.149648	0.165871	0.186644	0.139801	0.193453	0.122497	0.174279	0.130755	0.164532	0.164105
110611	Hdlbp	No_BS	No_BS	No_BS	68.8454	72.5518	62.9351	69.3885	69.0681	52.6205	68.7084	83.0957	51.9672	68.8	76.9258	58.3027	71.5178	85.3757	47.9521	65.8301	75.4928	39.8807	68.1108	63.6924	67.9238	68.0095	68.2819	60.4012
18000	2017-09-02	No_BS	No_BS	No_BS	90.4977	136.693	159.76	90.5121	128.674	161.432	106.426	111.407	164.092	102.619	112.968	126.47	111.263	151.166	151.781	102.412	118.039	149.243	128.984	126.873	127.308	114.019	138.07	123.231
227377	Farp2	No_BS	No_BS	No_BS	0.353144	0.231824	0.196056	0.359045	0.472221	0.181146	0.334762	0.390421	0.229675	0.341185	0.374973	0.109883	0.440539	0.305609	0.106436	0.553825	0.46194	0.155594	0.260341	0.337471	0.318286	0.275347	0.284195	0.390453
59041	Stk25	No_BS	No_BS	Merged-chr1-93668909-2 (-33187)	21.7266	22.0538	21.74	21.2947	24.5406	22.3998	22.02	26.1729	26.3329	20.9066	24.3294	21.0835	21.4946	26.5893	25.08	21.6902	26.5416	23.526	21.8401	22.745	24.8419	22.1065	24.388	23.9193
51800	Bok	No_BS	No_BS	Merged-chr1-93668909-2 (-16785)	20.1147	15.4472	18.0842	15.8245	13.0763	19.229	17.4804	17.0397	27.5411	11.2978	14.3101	21.5831	18.1204	19.2949	31.2413	11.9	14.81	27.1384	17.882	16.0432	20.687	15.7303	22.8855	17.9495
67026	Thap4	No_BS	No_BS	No_BS	20.3547	21.8509	15.9159	20.4041	23.5387	20.0829	22.3462	21.6506	18.5652	20.9907	24.9421	22.0702	20.9251	22.2216	20.7547	19.7136	22.3837	20.0727	19.3739	21.3419	20.854	22.6677	21.3005	20.7233
66615	Atg4b	No_BS	No_BS	No_BS	16.0919	16.8682	17.8546	15.0273	16.7004	17.2653	15.7797	16.3298	18.7464	15.215	16.2118	17.1422	15.8744	19.0323	18.3559	15.814	18.7622	20.0146	16.9382	16.331	16.952	16.1897	17.7542	18.197
21915	Dtymk	No_BS	No_BS	No_BS	146.982	234.023	184.425	140.911	191.335	200.731	189.798	158.562	195.256	140.943	155.58	173.191	185.097	213.69	233.794	126.648	152.315	208.304	188.476	177.659	181.205	156.571	210.86	162.422
66262	Ing5	No_BS	No_BS	No_BS	17.8091	21.8786	22.0212	21.0609	22.2321	22.944	20.6873	18.3828	18.6321	23.7346	21.8241	22.8002	20.0202	20.959	19.411	19.3083	18.0325	19.3251	20.5696	22.079	19.234	22.7863	20.1301	18.8886
98314	D2hgdh	No_BS	No_BS	No_BS	1.52471	1.46993	2.21302	1.78622	1.33176	1.78767	1.05227	1.75998	2.21135	1.03165	1.64258	2.36156	1.60564	2.78013	2.81398	1.62135	2.70943	2.26607	1.73588	1.63522	1.67453	1.6786	2.39992	2.19895
381334	Gal3st2	No_BS	No_BS	No_BS	0	0	0.0158524	0.0219346	0	0.0177855	0.0262943	0	0	0.0142115	0.0156189	0.015104	0.0457017	0	0.0162559	0	0.0119805	0.0164518	0.00528414	0.01324	0.00876478	0.0149781	0.0206525	0.00947742
100041596	Gm9994	No_BS	No_BS	No_BS	0	0	0	0	0	0	0.0315754	0	0	0	0	0	0	0	0	0	0	0	0	0	0.0105251	0	0	0
619597	Gm6086	No_BS	No_BS	No_BS	0.0680709	0.0291428	0.0555753	0.0307593	0.0413745	0.0498817	0.0184365	0.0627135	0.0466014	0.00996451	0.0109513	0.0423613	0.0400552	0.0218178	0.0227959	0.0205295	0.0084002	0.0230706	0.0509297	0.0406718	0.0425838	0.0210924	0.028223	0.0173335
241159	Neu4	No_BS	No_BS	No_BS	0	0	0	0	0	0	0.00830194	0	0	0	0	0	0	0	0	0	0	0	0	0	0.00276731	0	0	0
18566	Pdcd1	chr1-232 (-290187)	No_BS	No_BS	0.0357901	0.0204302	0.0935047	0.0646902	0.0217537	0	0	0.0188419	0.024502	0.0628694	0	0.0222726	0.0336961	0.0458853	0.119856	0.0215879	0.0176665	0.0970401	0.0499083	0.0288146	0.014448	0.0283807	0.0664791	0.0454315
74689	4930440C22Rik	No_BS	No_BS	No_BS	0	0	0	0	0	0	0	0	0	0	0	0	0	0	0	0	0	0	0	0	0	0	0	0
67698	Fam174a	chr1-232 (-970888)	No_BS	No_BS	5.67156	6.1943	4.83921	5.57005	5.02143	7.13497	5.39854	4.41833	8.82036	5.7588	4.70463	6.36529	5.58665	7.41841	8.82689	5.7939	6.10078	9.06659	5.56836	5.90882	6.21241	5.60957	7.27732	6.98709
20452	St8sia4	No_BS	No_BS	No_BS	0.0547538	0.034728	0.0397358	0.181439	0.0739559	0.0624136	0.0659095	0.0832735	0.074969	0.192362	0.133111	0.0908637	0.114556	0.0701979	0.0733449	0.168802	0.0540546	0.107219	0.0430725	0.105936	0.0747173	0.138779	0.086033	0.110025
75381	4930598F16Rik	No_BS	No_BS	No_BS	0	0	0.0592852	0	0	0	0	0	0.0621403	0	0	0	0	0	0	0	0	0	0.0197617	0	0.0207134	0	0	0
73454	1700063A18Rik	No_BS	No_BS	No_BS	0	0	0	0	0	0	0	0	0	0	0	0	0	0	0	0	0	0	0	0	0	0	0	0
75159	4930533P14Rik	No_BS	No_BS	No_BS	0	0	0	0	0	0	0	0	0	0	0	0	0	0	0	0	0	0	0	0	0	0	0	0
227394	Slco4c1	No_BS	No_BS	No_BS	0.952161	0.708228	0.697282	1.55152	1.01717	0.803451	0.687695	0.653171	0.770369	0.962999	0.742713	0.790053	0.692713	0.573374	0.695704	1.02682	0.555455	0.958342	0.78589	1.12405	0.703745	0.831922	0.653931	0.846874
329217	Panct2	No_BS	No_BS	No_BS	1.22561	1.3187	1.53189	1.89653	1.56491	1.39563	0.764194	0.900535	1.40043	1.07388	0.771685	1.11937	0.805241	0.938264	1.12206	1.12751	0.818244	1.75716	1.35874	1.61902	1.02172	0.988312	0.955188	1.23431
67854	Slco6b1	No_BS	No_BS	No_BS	0	0	0	0	0	0	0	0	0	0	0	0	0	0	0	0	0	0	0	0	0	0	0	0
74441	Slco6c1	chr1-233 (-59108)	No_BS	No_BS	0	0	0	0	0	0	0	0	0	0	0	0	0	0	0	0	0	0	0	0	0	0	0	0
52392	D1Ertd622e	chr1-233 (+474315)	No_BS	No_BS	3.09046	2.44819	2.98247	2.34838	2.16211	2.73608	3.5531	3.4532	4.97413	3.08737	3.42558	3.28126	3.55096	4.44734	4.44394	3.54561	3.63629	5.18153	2.84037	2.41552	3.99348	3.26474	4.14741	4.12114
227399	Ppip5k2	No_BS	No_BS	No_BS	16.1522	13.3842	19.2926	18.6785	14.9525	20.4088	15.7919	15.3284	18.8204	19.3005	17.5155	20.7673	15.616	14.052	14.898	16.3501	14.66	17.2386	16.2763	18.0133	16.6469	19.1944	14.8553	16.0829
252876	Gin1	No_BS	No_BS	No_BS	6.00725	6.72303	11.6935	5.97956	6.43862	14.285	5.71977	5.23825	11.7469	5.48924	5.72793	8.78256	5.40088	7.00745	10.4497	5.55257	5.41266	10.6445	8.14125	8.90105	7.56831	6.66657	7.61935	7.20323
18484	Pam	No_BS	No_BS	No_BS	3.88894	3.50768	3.47469	3.86454	3.92935	4.02176	4.81504	6.21296	6.23525	5.54	6.77117	5.07075	4.99283	7.72702	4.87112	5.3109	6.27414	4.86135	3.62377	3.93855	5.75442	5.79397	5.86366	5.48213
78603	B230216N24Rik	No_BS	No_BS	No_BS	0.117275	0.0334722	0.114897	0.0794898	0	0.042969	0.031763	0.0617401	0.160573	0.103003	0.0377346	0.109472	0.0552067	0.112766	0.117821	0.070738	0	0.0397469	0.0885479	0.0408196	0.0846921	0.0834034	0.0952644	0.0368283
69030	1810006J02Rik	No_BS	No_BS	No_BS	0	0	0	0	0	0	0	0	0.0280313	0	0	0	0	0	0	0	0	0	0	0	0.00934376	0	0	0
70866	Slco6d1	No_BS	No_BS	No_BS	0	0	0	0	0	0	0	0	0	0.0173737	0	0	0	0	0	0	0	0	0	0	0	0.00579123	0	0
241175	Cntnap5b	chr1-234 (+7091)	No_BS	No_BS	0	0.0154024	0	0	0.00820014	0	0	0.00710252	0	0	0.0086819	0	0	0	0	0	0	0	0.00513414	0.00273338	0.00236751	0.00289397	0	0
100504525	Gm20268	No_BS	No_BS	No_BS	0	0	0	0	0	0	0	0	0	0	0	0	0	0	0	0	0	0	0	0	0	0	0	0
23836	Cdh20	No_BS	No_BS	No_BS	0.00927928	0.0211876	0.0848501	0.109019	0.0451206	0.0679976	0.0100529	0.0195405	0	0.152134	0.191086	0.0923935	0.0262091	0.0237933	0.0497199	0.067165	0.0458039	0.0377393	0.038439	0.0740458	0.00986447	0.145205	0.0332408	0.0502361
320311	Rnf152	No_BS	No_BS	No_BS	0.0404942	0.0462307	0.0899252	0.0841715	0.0393807	0.047478	0.0745792	0.0938009	0.0665336	0.118554	0.0833886	0.0806399	0.0571874	0.0830659	0.0596679	0.0928162	0.0919472	0.104305	0.0588834	0.0570101	0.0783046	0.0941942	0.0666404	0.096356
27392	Pign	No_BS	No_BS	No_BS	4.13308	3.64222	4.87309	5.09854	3.63038	5.10133	4.52182	4.30884	6.34983	5.34147	4.63732	5.33441	4.47184	4.57363	4.7104	4.94296	4.50292	4.61517	4.21613	4.61008	5.06016	5.1044	4.58529	4.68701
227446	2310035C23Rik	No_BS	No_BS	No_BS	8.47146	9.3871	15.0804	9.94821	10.0652	16.4137	8.00801	7.36581	13.6985	10.1601	8.60906	13.4699	8.39084	7.0113	12.8113	8.82465	7.23429	13.39	10.9797	12.1423	9.69078	10.7464	9.40447	9.81633
21934	Tnfrsf11a	No_BS	Merged-chr1-105780619-2 (-104)	No_BS	0.158176	0.0785149	0.161706	0.136736	0.117042	0.0806331	0.0745058	0.137581	0.131829	0.177183	0.168175	0.136953	0.148922	0.0440853	0.110548	0.315265	0.210472	0.33564	0.132799	0.11147	0.114639	0.16077	0.101185	0.287126
227449	Zcchc2	chr1-236 (+81615)	No_BS	No_BS	4.3593	3.33171	2.89804	4.67047	3.05607	2.67407	3.41991	3.98415	2.87437	3.81211	3.24896	3.07735	3.66015	2.56518	3.562	3.27665	3.06013	2.6141	3.52969	3.46687	3.42614	3.37947	3.26244	2.98363
626049	Gm20753	No_BS	No_BS	No_BS	0.126743	0.072349	0	0.0572716	0	0	0	0	0	0	0.0815621	0	0	0	0	0	0	0.171823	0.066364	0.0190905	0	0.0271874	0	0.0572744
98432	Phlpp1	chr1-236 (-99448), chr1-148 (+106984)	No_BS	No_BS	2.71592	1.63431	1.27868	3.84538	3.22589	1.99849	2.11481	2.24004	1.44098	3.651	2.6362	2.34508	2.46113	1.45083	1.52345	2.90779	2.69241	1.48811	1.87631	3.02325	1.93194	2.87743	1.8118	2.36277
12043	Bcl2	chr1-148 (+435538)	No_BS	No_BS	0.401702	0.214018	0.1341	0.137147	0.119367	0.0784969	0.319141	0.371262	0.305562	0.151581	0.160847	0.144435	0.533682	0.286116	0.263069	0.209993	0.251163	0.211781	0.24994	0.11167	0.331988	0.152288	0.360956	0.224312
102466254	Mir3473f	No_BS	No_BS	No_BS	0.761856	0	0.331735	0.459015	0	0.372187	0.275124	1.06956	0.347712	0.297397	0.326848	0.632148	0.478188	0.325583	0.680358	0.306358	0.250709	0.344278	0.364531	0.277067	0.56413	0.418798	0.49471	0.300448
70750	Kdsr	No_BS	No_BS	No_BS	5.9893	6.33624	7.1691	5.944	6.1375	7.37226	6.4484	6.51467	8.86135	6.68786	6.52994	7.99347	6.62336	8.05943	8.95947	7.47158	7.39713	9.11776	6.49821	6.48459	7.27481	7.07042	7.88075	7.99549
20479	Vps4b	No_BS	No_BS	No_BS	28.7848	32.1756	43.2546	27.8647	29.1276	41.1035	29.9037	29.3742	39.4989	32.7078	32.1973	37.0479	30.1913	33.02	34.0478	31.9361	28.0003	38.1358	34.7383	32.6986	32.9256	33.9844	32.4197	32.6907
20724	Serpinb5	No_BS	No_BS	No_BS	0.228903	0.276703	0.562851	0.158195	0.327366	0.374944	0.189637	0.0567094	0.460904	0.078842	0.0346599	0.167587	0.0633855	0.0863144	0.270552	0.0974613	0.159515	0.31032	0.356153	0.286835	0.23575	0.0936964	0.140084	0.189099
71869	Serpinb12	No_BS	No_BS	No_BS	0	0	0	0	0	0	0	0	0	0	0	0	0	0	0	0	0	0.0269867	0	0	0	0	0	0.00899555
241196	Serpinb13	No_BS	No_BS	No_BS	0	0	0	0	0	0	0	0	0	0	0	0	0	0	0	0	0	0	0	0	0	0	0	0
20248	Serpinb3a	No_BS	No_BS	No_BS	0	0	0	0	0	0	0	0	0	0	0	0	0	0	0	0	0	0	0	0	0	0	0	0
394252	Serpinb3d	No_BS	No_BS	No_BS	0	0	0	0	0	0	0	0	0	0	0	0	0	0	0	0	0	0	0	0	0	0	0	0
383548	Serpinb3b	No_BS	No_BS	No_BS	0	0	0	0	0	0	0	0	0	0	0	0	0	0	0	0	0	0	0	0	0	0	0	0
381286	Serpinb3c	No_BS	No_BS	No_BS	0	0	0	0	0	0	0	0	0	0	0	0	0	0	0	0	0	0	0	0	0	0	0	0
66957	Serpinb11	No_BS	No_BS	No_BS	0	0	0	0	0.0247114	0	0	0	0	0	0	0	0	0	0	0	0	0	0	0.00823715	0	0	0	0
116872	Serpinb7	No_BS	No_BS	No_BS	0	0	0	0	0	0	0	0	0	0	0	0	0	0	0	0	0	0	0	0	0	0	0	0
18788	Serpinb2	No_BS	No_BS	No_BS	0	0.0577873	0	0	0	0	0.0365577	0.017765	0.0231015	0.0395173	0.0434307	0	0.0317702	0.0432626	0	0.0407081	0.0333135	0	0.0192624	0	0.0258081	0.0276493	0.0250109	0.0246739
241197	Serpinb10	No_BS	No_BS	No_BS	0	0.0112981	0	0	0.01203	0	0	0	0	0	0	0	0	0.0126875	0	0	0	0	0.00376602	0.00401	0	0	0.00422916	0
20725	Serpinb8	chr1-237 (+544894)	No_BS	No_BS	0.0315027	0.0839195	0.178324	0.0664308	0.0893564	0.0615597	0.147893	0.110565	0.158156	0.0491894	0.0946061	0.0914876	0.158184	0.201943	0.182863	0.152015	0.0933012	0	0.0979155	0.072449	0.138871	0.0784277	0.180997	0.081772
319596	D830032E09Rik	No_BS	No_BS	No_BS	0	0	0	0	0	0	0	0	0	0	0	0	0	0	0	0	0	0	0	0	0	0	0	0
241201	Cdh7	No_BS	No_BS	No_BS	0.0103005	0	0	0.00930898	0.0125215	0.0150962	0	0.0108455	0.0282069	0	0.0132572	0	0	0	0	0	0	0	0.00343349	0.0123089	0.0130174	0.00441906	0	0
227485	Cdh19	No_BS	No_BS	No_BS	0.0226179	0	0.0443183	0.0102204	0	0.0165741	0.0122517	0	0	0.0529744	0	0.0140753	0	0	0.0302975	0.0272853	0	0	0.0223121	0.0089315	0.00408392	0.0223499	0.0100992	0.00909511
319901	Dsel	No_BS	No_BS	No_BS	1.95371	1.60786	1.76926	2.22602	1.4789	2.16944	1.72054	1.59014	2.38783	1.87386	1.55036	1.93188	1.67577	1.92084	2.50468	1.98093	1.63885	2.07176	1.77694	1.95812	1.8995	1.78537	2.03377	1.89718
636808	Cntnap5a	No_BS	No_BS	No_BS	0	0.0100716	0.0115239	0	0	0	0	0	0.0241577	0.020662	0.0113541	0	0	0.0113102	0	0	0	0.0119596	0.00719849	0	0.00805258	0.0106721	0.00377005	0.00398653
22099	Tsn	No_BS	No_BS	No_BS	40.6972	54.8701	59.8578	40.3643	51.4482	54.4983	47.7591	46.4882	52.7195	47.1803	47.9764	55.7589	46.1591	53.9249	46.8733	44.5027	45.4731	50.3654	51.8084	48.7703	48.9889	50.3052	48.9857	46.7804
67949	Nifk	No_BS	No_BS	No_BS	62.4191	96.8892	134.562	61.3383	79.5582	127.933	78.2711	72.9026	128.109	69.9796	78.623	102.336	79.5579	79.9786	123.526	62.607	64.4843	125.781	97.9568	89.6099	93.0943	83.6462	94.3543	84.2909
76707	Clasp1	No_BS	No_BS	No_BS	9.32841	7.81594	5.78631	10.4559	8.86611	4.75643	9.26037	9.32788	5.3624	11.3711	10.0135	6.45747	10.4384	7.2365	5.62222	12.4544	10.1965	4.51273	7.64355	8.02613	7.98355	9.2807	7.76571	9.05454
68204	2900060B14Rik	No_BS	Merged-chr1-118459209-1 (-462)	Merged-chr1-118459194-1 (-447), Merged-chr1-118458073-1 (+674)	0.115703	0.198142	0.0755712	0.313698	0.351631	0.593504	0.188024	0.182738	0.237632	0.270995	0	0.216011	0.163401	0.0741697	0.154989	0.13958	0.171339	0.549	0.129805	0.419611	0.202798	0.162335	0.130853	0.28664
81879	Tfcp2l1	chr1-29 (+131497), chr1-150 (+200847), chr1-127 (+422117)	Merged-chr1-118748864-1 (+120919), Merged-chr1-119050112-1 (+422167)	No_BS	31.6687	27.2651	43.7776	27.5227	24.0087	34.8862	20.0848	13.0631	24.4963	25.655	10.583	28.611	20.0783	6.72548	18.9649	15.0793	6.52871	12.0969	34.2371	28.8059	19.2147	21.6163	15.2562	11.235
14633	Gli2	chr1-127 (+3557), chr1-150 (+224827), chr1-29 (+294177)	Merged-chr1-119305553-2 (-251934), Merged-chr1-119304789-2 (-251170), Merged-chr1-119076220-1 (-22601), Merged-chr1-119050112-1 (+3507), Merged-chr1-118748864-1 (+304755)	No_BS	11.1778	10.0927	7.82872	14.9085	14.1702	9.95295	11.34	9.61165	7.00731	24.1663	13.2665	15.5142	10.6499	4.58107	9.00734	7.93791	5.23035	5.03956	9.69974	13.0105	9.31964	17.649	8.07943	6.06927
102465176	Mir6346	No_BS	No_BS	No_BS	0.863437	0	0	0	0	0	0	0	0.59111	0	0	0	0	0	0	0	0	0	0.287812	0	0.197037	0	0	0
16324	Inhbb	No_BS	Merged-chr1-119305553-2 (+116695), Merged-chr1-119304789-2 (+117459), Merged-chr1-119076220-1 (+346028)	No_BS	16.2176	17.7459	21.8741	8.96411	10.3408	13.7756	12.8211	7.62338	14.0699	9.6481	6.24722	12.3857	9.13985	4.08972	15.8636	2.45778	1.92318	5.08383	18.6125	11.0268	11.5048	9.42699	9.69773	3.15493
64143	Ralb	No_BS	No_BS	No_BS	17.9741	17.3687	12.4827	15.5722	15.3778	12.8711	18.3551	18.0786	17.2375	14.53	18.3311	14.7251	17.3508	24.5024	15.7262	19.6155	21.7876	14.7231	15.9418	14.607	17.8904	15.8621	19.1931	18.7087
226351	Tmem185b	No_BS	No_BS	No_BS	4.95485	6.36735	5.93045	4.87496	5.9194	5.31215	5.51336	5.49971	5.58108	5.00215	5.23049	5.98464	5.73352	6.13339	5.81982	4.49037	5.07229	4.63255	5.75088	5.36884	5.53138	5.40576	5.89558	4.73174
320069	3830432H09Rik	No_BS	No_BS	No_BS	0.0429215	0.016334	0.112136	0.06465	0.0521766	0.0209683	0.0309999	0.0451925	0.0783576	0.067019	0.128898	0.017807	0.0134701	0.0550281	0.03833	0.0172596	0.0282489	0	0.0571305	0.0459316	0.0515166	0.0712413	0.0356094	0.0151695
226352	Epb4.1l5	No_BS	No_BS	No_BS	3.58038	3.21204	2.73166	3.83614	3.53396	2.28059	3.86438	3.85432	2.94868	4.997	4.18345	3.16874	4.39098	3.36696	3.01023	4.66886	4.371	3.04046	3.17469	3.2169	3.55579	4.1164	3.58939	4.02677
19258	Ptpn4	No_BS	No_BS	No_BS	3.93372	3.04147	2.2721	3.84027	2.82813	2.36631	3.46658	2.89003	2.25089	3.77301	2.81481	1.82686	3.52392	2.35228	2.02517	3.26695	2.49239	1.48246	3.08243	3.01157	2.86917	2.80489	2.63379	2.41393
66343	Tmem177	No_BS	No_BS	No_BS	3.48312	3.66514	3.4673	3.56503	3.27767	2.75228	3.31887	3.02673	2.88732	2.81353	3.06514	3.43419	2.89411	2.70357	2.82477	3.22737	3.26257	2.7308	3.53852	3.19833	3.07764	3.10429	2.80748	3.07358
226356	Cfap221	No_BS	No_BS	No_BS	0	0.031406	0	0.024861	0.0167203	0.0403166	0.0298023	0.0434467	0	0.032215	0.0177026	0.0171191	0.0388492	0.0176341	0.0368493	0.0497786	0.0271576	0	0.0104687	0.0272993	0.0244163	0.0223456	0.0311109	0.0256454
319229	Sctr	No_BS	No_BS	No_BS	0	0	0.0234735	0.0162399	0.0218443	0	0	0	0.0492079	0	0.0462553	0.0223653	0	0.0460763	0.0240709	0	0.0354801	0	0.00782449	0.0126947	0.0164026	0.0228735	0.0233824	0.0118267
170706	Tmem37	No_BS	No_BS	Merged-chr1-120104009-2 (-29935)	2.75077	2.17118	1.8632	2.05631	1.81645	1.99085	2.5754	4.18357	3.71987	1.51126	3.58408	2.57832	3.1014	5.35531	3.36633	2.04841	3.4197	2.30196	2.26172	1.95454	3.49294	2.55789	3.94102	2.59002
13167	Dbi	No_BS	No_BS	Merged-chr1-120104009-2 (+16928)	56.7898	71.8741	95.4401	60.6244	69.4298	99.0607	54.6939	65.8961	97.18	54.7785	72.3155	83.7219	58.181	80.832	88.3059	58.2187	71.2592	111.555	74.7013	76.3716	72.59	70.272	75.773	80.3444
73103	3110009E18Rik	chr1-14 (+89818)	Merged-chr1-120211005-2 (+89810)	No_BS	2.41033	3.40352	2.56859	1.6624	2.50598	1.95219	3.0923	3.10554	2.86599	2.37699	3.02057	2.32891	3.28452	3.25284	2.88887	2.3721	2.63003	3.00967	2.79415	2.04019	3.02128	2.57549	3.14208	2.6706
68428	Steap3	chr1-14 (+60069)	Merged-chr1-120211005-2 (+60077)	No_BS	12.2517	11.381	10.9914	19.1778	17.9727	15.9643	4.60497	3.66282	4.98638	7.79129	7.6674	7.92882	5.52693	3.34499	5.86859	2.42618	1.68497	3.47811	11.5414	17.7049	4.41806	7.79584	4.9135	2.52975
226359	C1ql2	No_BS	No_BS	No_BS	0	0.0197151	0.022558	0.0156065	0	0	0	0	0.0236444	0.020223	0	0.021493	0	0	0.0231322	0	0	0.0468218	0.014091	0.00520217	0.00788146	0.0139053	0.00771072	0.0156073
17167	Marco	No_BS	No_BS	No_BS	0	0	0	0	0.021151	0	0	0.0183198	0	0	0	0	0	0.0446139	0	0	0	0	0	0.00705033	0.00610661	0	0.0148713	0
13798	En1	No_BS	No_BS	No_BS	0.108183	0.21614	0.0706594	0.0977698	0.147949	0	0.205104	0.256291	0.111093	0.126691	0.156641	0.0336618	0.254634	0.676152	0.0724578	0.228389	0.587409	0.329989	0.131661	0.0819064	0.19083	0.105665	0.334415	0.381929
98452	Celrr	No_BS	No_BS	No_BS	0.0437183	0.0249558	0.0856633	0.0395101	0.0265726	0.0640727	0	0.0460315	0	0.127994	0.0562675	0.0272064	0.0411605	0.0280249	0.0878437	0.15822	0.04316	0	0.0514458	0.0433852	0.0153438	0.0704892	0.052343	0.0671268
72999	Insig2	No_BS	No_BS	No_BS	5.59056	7.25046	6.52372	5.55978	6.32686	7.49063	5.30906	6.84689	7.8788	5.39645	6.80393	6.65244	6.43068	8.14211	8.14678	6.15165	6.53524	8.24496	6.45491	6.45909	6.67825	6.28427	7.57319	6.97728
70829	Ccdc93	No_BS	No_BS	No_BS	3.42709	2.83119	2.25704	3.08431	2.3492	1.79979	3.1301	3.69362	2.17023	3.18841	3.1856	1.74764	3.50443	4.02761	2.19972	3.451	3.34573	1.70355	2.83844	2.4111	2.99798	2.70722	3.24392	2.83343
15564	Htr5b	No_BS	No_BS	No_BS	0.206811	0.196757	0.045026	0.109027	0.0209505	0.202066	0.0933554	0.145169	0.0943888	0.0807305	0.243994	0.0214501	0.113582	0.132573	0.092344	0.124745	0.153128	0.163549	0.149532	0.110681	0.110971	0.115392	0.112833	0.147141
66942	Ddx18	No_BS	No_BS	No_BS	105.471	123.989	139.681	99.357	110.516	124.417	109.006	107.882	121.618	93.7864	106.691	121.714	112.862	113.76	111.001	89.2021	93.7538	113.984	123.047	111.43	112.835	107.397	112.541	98.9799
269109	Dpp10	chr1-238 (+13408)	No_BS	No_BS	0.0074595	0.00851624	0	0	0	0.021865	0	0.00785419	0.0510678	0	0.00960072	0.0185685	0	0.00956356	0.0499615	0.00899886	0	0.0202254	0.00532525	0.00728833	0.0196407	0.00938974	0.0198417	0.00974142
74117	Actr3	chr1-75 (+45591)	Merged-chr1-125435916-1 (-189), Merged-chr1-125390331-2 (+45396)	Merged-chr1-125390291-2 (+45436), Merged-chr1-125389874-2 (+45853)	114.014	137.058	112.938	98.3562	117.193	112.737	111.705	111.862	110.249	92.2627	110.416	105.728	119.256	143.593	122.434	95.9229	113.713	118.691	121.337	109.429	111.272	102.802	128.428	109.442
74150	Slc35f5	chr1-239 (-749)	No_BS	No_BS	10.2003	11.1139	9.25947	8.11274	7.50132	9.49199	8.45733	11.6502	11.5263	7.00835	9.49961	8.32576	11.6069	15.9931	13.2362	8.67948	10.6609	11.6108	10.1912	8.36868	10.5446	8.27791	13.612	10.3171
71111	Gpr39	chr1-64 (+131663)	No_BS	No_BS	0.115596	0.029327	0.117446	0	0.031227	0	0.0834887	0.162283	0.052758	0.0752063	0.0330616	0.0319718	0.0967401	0.0823341	0.0688201	0.030989	0.11412	0.0174124	0.0874563	0.010409	0.0995099	0.0467466	0.0826315	0.0541737
72585	Lypd1	chr1-64 (+103556)	No_BS	Merged-chr1-126317078-2 (-404864), Merged-chr1-126150080-2 (-237866)	0.016897	0	0.0441448	0.0916233	0.0205405	0.0247639	0.0366114	0.0889552	0	0.0989383	0.0434945	0	0.0318168	0	0.0905368	0.244607	0.0834061	0.0687209	0.0203473	0.0456426	0.0418555	0.0474776	0.0407845	0.132245
210356	Nckap5	No_BS	Merged-chr1-127236554-2 (-405922)	Merged-chr1-127244663-1 (-414031), Merged-chr1-126317078-2 (+513554), Merged-chr1-126150080-2 (+680552)	0.131909	0.0675086	0.23173	0.131544	0.0442352	0.193324	0.0739171	0.0766282	0.0996471	0.0852279	0.0351255	0.101903	0.0728019	0.0233264	0.0853023	0.12072	0.0493956	0.055498	0.143716	0.123034	0.0833975	0.0740855	0.0604769	0.0752044
107895	Mgat5	No_BS	Merged-chr1-127236554-2 (-70208)	Merged-chr1-127244663-1 (-62099)	1.45761	1.34652	0.886623	2.41338	1.6637	1.09258	1.0849	1.17155	0.533218	2.52787	1.86169	1.14943	1.079	0.713262	0.715428	2.68458	1.34013	0.724049	1.23025	1.72322	0.929887	1.84633	0.835898	1.58292
72160	Tmem163	No_BS	Merged-chr1-127677767-1 (+329)	No_BS	0.0960518	0.109659	0.107547	0.223216	0.183485	0.180992	0.10406	0.31785	0.075151	0.626695	0.547474	0.666054	0.180864	0.457394	0.110284	0.215193	0.460579	0.0930112	0.104419	0.195898	0.165687	0.613408	0.249514	0.256261
266645	Acmsd	No_BS	No_BS	No_BS	0.119974	0.0171212	0.176311	0.0135532	0.145844	0.131873	0.113729	0.110532	0.123201	0.105374	0.115809	0.0933263	0.0988352	0.0769072	0.100444	0.12664	0.0592209	0.0406616	0.104469	0.0970901	0.115821	0.104836	0.092062	0.0755076
100502745	2900009J06Rik	No_BS	No_BS	No_BS	0.52104	0.0849789	0	0.605425	0.361937	0.109089	0.403199	0.0783726	0	0.348672	0.574802	0.0926424	0.280317	0.0954295	0.199415	0.448973	0.587869	0.201818	0.202006	0.358817	0.160524	0.338705	0.191721	0.412887
72949	Ccnt2	No_BS	Merged-chr1-127819925-2 (+45761)	Merged-chr1-127774354-1 (+190)	30.4685	24.7421	25.1643	30.2093	26.1299	23.9691	25.5763	25.7266	24.8825	28.9245	24.7936	27.1201	25.2158	22.127	23.7115	29.3337	26.8483	23.0778	26.7916	26.7694	25.3951	26.9461	23.6848	26.4199
22625	Map3k19	No_BS	Merged-chr1-127819925-2 (+20365)	No_BS	0	0	0	0	0.0106669	0	0	0.00923905	0	0	0	0.0109213	0	0	0	0.0317566	0	0	0	0.00355562	0.00307968	0.00364042	0	0.0105855
226407	Rab3gap1	No_BS	No_BS	Merged-chr1-127989683-2 (+120910)	14.0555	15.1191	14.8901	15.0375	15.9109	15.0864	11.3632	11.4116	11.6025	13.13	12.4853	12.0232	11.1908	10.8016	10.2737	13.1433	12.721	11.5981	14.6882	15.3449	11.4591	12.5461	10.7554	12.4875
226409	Zranb3	No_BS	No_BS	Merged-chr1-127989683-2 (+112779)	9.91829	7.92452	10.975	10.9434	8.97443	12.5838	10.5018	8.00974	12.2507	11.6339	9.6566	12.9737	9.99528	6.98551	11.1039	11.665	9.0628	12.1732	9.60594	10.8339	10.2541	11.4214	9.36155	10.967
226412	R3hdm1	No_BS	No_BS	No_BS	12.9982	10.7753	11.3259	14.5427	12.119	9.79319	11.3526	12.5977	11.2424	14.6251	13.607	12.0954	12.062	7.4535	10.0374	12.6501	13.1015	9.78861	11.6998	12.1516	11.7309	13.4425	9.85097	11.8467
387147	Mir128-1	No_BS	No_BS	No_BS	0.493393	0	0	0	0	0	0	0	0	0	0	0	0	0	0	0	0	0	0.164464	0	0	0	0	0
67812	Ubxn4	No_BS	No_BS	No_BS	19.4416	18.5254	16.9089	19.6673	16.32	15.7801	20.3951	18.0447	15.84	20.5639	19.5377	16.9298	21.4024	20.4574	16.7062	22.1404	18.8517	17.7198	18.2919	17.2558	18.0932	19.0105	19.522	19.5706
226413	Lct	No_BS	No_BS	No_BS	0.0336077	0.0255791	0.0219507	0.045559	0.0204272	0.0164182	0.0424778	0.0294882	0.0230078	0.013119	0.0504637	0.0278859	0.0263678	0.0143624	0.00750313	0.081086	0.0276487	0.0151871	0.0270458	0.0274682	0.0316579	0.0304896	0.0160778	0.0413073
17219	Mcm6	No_BS	No_BS	No_BS	107.422	117.217	124.368	118.719	138.849	128.629	110.935	98.6653	102.369	139.295	135.07	146.888	107.055	98.0525	103.405	149.352	134.764	150.149	116.336	128.732	103.99	140.418	102.838	144.755
226414	Dars	No_BS	No_BS	Merged-chr1-128444631-2 (-27215)	88.3879	99.2277	124.397	91.8973	96.7205	152.417	84.1245	65.6423	128.579	85.8086	79.4774	122.105	81.5187	81.9405	110.286	112.722	87.5445	173.217	104.004	113.678	92.7819	95.7971	91.2483	124.494
12767	Cxcr4	No_BS	No_BS	Merged-chr1-128444631-2 (+147659)	0.285591	0.369522	0.373065	0.636649	0.416607	0.334845	0.391907	0.200468	0.312825	0.802676	0.514597	0.639815	0.358509	0.244098	0.382561	7.87817	3.89083	3.71684	0.342726	0.4627	0.301734	0.652363	0.328389	5.16194
210417	Thsd7b	No_BS	No_BS	Merged-chr1-129683109-2 (+409765)	0	0.0126116	0.0144302	0.00998337	0.0335717	0.0323796	0.0119676	0.00581559	0.00756258	0.0194047	0.0213264	0.0137489	0.0104004	0.00708129	0.00739874	0.0266526	0.0218112	0.0224637	0.00901394	0.0253116	0.0084486	0.01816	0.00829347	0.0236425
13137	Cd55b	No_BS	No_BS	Merged-chr1-129683109-2 (+739900)	0.0260857	0	0.0340755	0.0471495	0.0317105	0	0	0.0549319	0	0.0305483	0	0	0	0	0	0	0.0257526	0	0.0200538	0.0262867	0.0183106	0.0101828	0	0.00858419
13136	Cd55	No_BS	No_BS	No_BS	1.88685	3.43414	5.07243	2.33541	4.07215	5.53065	1.95527	3.51268	3.95009	2.5619	4.10022	3.3184	1.99529	4.45247	3.22348	2.54013	3.81999	3.68866	3.46447	3.9794	3.13935	3.32684	3.22375	3.34959
22789	Zp3r	No_BS	No_BS	No_BS	0.0509402	0	0.0221809	0.0306912	0	0	0.0367914	0.0178785	0	0.0198849	0	0.0211338	0.0159866	0.0435391	0.045491	0.0409682	0.0335265	0.0230196	0.0243737	0.0102304	0.0182233	0.0136729	0.0350056	0.0325048
12269	C4bp	No_BS	No_BS	No_BS	0	0	0	0	0	0	0.0397417	0.0193122	0	0	0.0472133	0	0	0.0470306	0	0	0	0	0	0	0.0196846	0.0157378	0.0156769	0
12270	C4bp-ps1	No_BS	No_BS	No_BS	0	0.0522947	0.0598356	0	0.0556827	0.134264	0	0.192917	0	0.0536419	0.058954	0	0	0.293629	0.0613585	0	0.135662	0.0620979	0.0373768	0.0633155	0.0643057	0.037532	0.118329	0.06592
18640	Pfkfb2	No_BS	No_BS	No_BS	1.23848	1.2295	1.52403	1.25228	1.11279	1.15219	1.00727	1.57993	1.34675	1.24436	1.30753	1.02763	1.17616	1.64304	1.20698	1.25587	1.26165	1.08039	1.33067	1.17242	1.31132	1.19317	1.34206	1.1993
226418	Yod1	No_BS	No_BS	No_BS	0.920518	1.05092	1.02563	1.08475	0.921536	0.80681	0.958153	1.16877	1.09974	0.898329	0.929216	0.77503	1.00261	0.96033	0.604446	1.07782	1.15823	0.721842	0.999024	0.937698	1.07555	0.867525	0.855795	0.985962
212439	AA986860	No_BS	No_BS	Merged-chr1-130731973-2 (-3)	0.296816	0.759055	0.35671	0.397003	0.490712	0.365406	0.398736	2.22515	0.487681	0.236363	0.97796	0.413754	0.458298	3.01385	0.540731	0.458326	1.57062	0.225337	0.47086	0.417707	1.03719	0.542693	1.33763	0.751426
64435	Fcamr	No_BS	No_BS	No_BS	0	0	0	0	0	0	0	0.0190292	0.0247456	0	0.0232608	0	0	0	0	0	0	0	0	0	0.0145916	0.00775359	0	0
18703	Pigr	No_BS	No_BS	No_BS	0	0.0307328	0	0	0	0.0131508	0	0.0283436	0	0.0105082	0.0346464	0	0	0.0230082	0.0120198	0.0108248	0.0620096	0	0.0102443	0.0043836	0.00944788	0.0150515	0.011676	0.0242781
69169	Fcmr	No_BS	No_BS	No_BS	0	0.0264455	0	0	0	0	0	0	0.0317162	0	0	0	0.0218087	0	0	0	0.0228682	0	0.00881516	0	0.0105721	0	0.00726957	0.00762272
93672	Il24	No_BS	No_BS	No_BS	0.216633	0.317985	0.0404265	0	0.0376207	0	0.100583	0.19551	0.254241	0.0724838	0	0.077036	0.320506	0.317414	0.538921	0.18667	0.0305523	0.0419551	0.191682	0.0125402	0.183445	0.0498399	0.392281	0.0863924
58181	Il20	No_BS	No_BS	No_BS	0	0	0	0	0	0	0	0	0	0	0	0	0	0	0	0	0	0	0	0	0	0	0	0
329244	Il19	chr1-128 (-45442)	No_BS	No_BS	0	0	0	0	0	0	0	0	0	0	0	0	0.0317857	0	0	0	0	0	0	0	0	0	0.0105952	0
16153	Il10	chr1-128 (-35162), chr1-129 (+59014)	Merged-chr1-131078882-1 (+59037)	No_BS	0.105781	0.0301916	0.0345452	0.0238997	0	0	0.20055	0.389823	0.217253	0	0.0340363	0	0.12449	0.67809	0.177122	0.223318	0.182753	0.143405	0.0568392	0.00796656	0.269209	0.0113454	0.326567	0.183159
17164	Mapkapk2	chr1-129 (+18684)	Merged-chr1-131078882-1 (+18661)	No_BS	13.9119	14.2698	12.1094	14.9925	14.6709	11.5156	15.3924	19.337	11.8636	16.6227	19.3771	14.9874	16.9994	24.4769	14.256	17.7079	21.9827	14.5737	13.4304	13.7263	15.531	16.9957	18.5774	18.0881
226419	Dyrk3	No_BS	No_BS	No_BS	25.4697	33.3406	34.1419	20.2613	24.7815	25.5286	30.5005	30.2924	30.8792	19.6569	22.4402	28.4223	28.4365	29.8116	37.1097	15.765	20.7179	23.8403	30.9841	23.5238	30.5574	23.5065	31.7859	20.1077
16865	Eif2d	chr1-65 (+25782)	Merged-chr1-131179136-2 (+25955)	Merged-chr1-131178966-2 (+25785)	63.5399	91.9636	73.2889	59.1275	88.6996	63.7249	68.298	75.9216	66.8858	52.0322	68.2299	59.0355	65.3459	81.6557	62.9518	50.7982	66.019	57.6583	76.2642	70.5174	70.3685	59.7659	69.9845	58.1585
54354	Rassf5	chr1-65 (+66295)	Merged-chr1-131179136-2 (+66122)	Merged-chr1-131178966-2 (+66292)	0.405727	0.416883	0.582997	1.43002	1.12206	0.817609	0.791193	0.608751	0.541634	1.97181	1.20103	1.41393	0.420187	0.598193	0.380441	0.868779	0.590804	0.591289	0.468536	1.12323	0.647193	1.52893	0.466274	0.683624
56489	Ikbke	No_BS	No_BS	Merged-chr1-131432007-2 (-152401)	0.560708	0.566278	0.605679	0.311838	0.340806	0.442488	0.595772	1.72571	0.797251	0.404081	0.91595	0.24157	0.690334	1.88011	0.635539	0.273169	1.4371	0.306981	0.577555	0.365044	1.03958	0.520534	1.06866	0.672415
14270	Srgap2	No_BS	No_BS	Merged-chr1-131432007-2 (+95354)	6.86024	5.71836	4.94368	6.74341	6.90346	3.86556	6.19425	7.74789	4.74064	7.7622	6.9165	5.05247	6.58424	6.3445	4.25241	8.88225	8.96515	4.00082	5.84076	5.83748	6.2276	6.57706	5.72705	7.28274
108900	Fam72a	chr1-240 (+8611)	No_BS	No_BS	4.92221	7.47394	6.98709	5.75328	6.96089	7.26198	5.61697	5.40723	6.2902	5.47606	5.91277	7.22901	5.31391	6.10024	7.20888	5.91817	5.63684	8.89726	6.46108	6.65871	5.77146	6.20595	6.20767	6.81742
26361	Avpr1b	chr1-240 (-62725)	No_BS	No_BS	0	0	0	0.0150497	0.0101217	0.0122029	0	0.00876685	0.0228008	0.0195014	0	0	0.00783915	0	0	0.0100445	0.00821996	0.0112878	0	0.0124581	0.0105225	0.00650048	0.00261305	0.00985077
13034	Ctse	No_BS	No_BS	No_BS	0	0.0185991	0	0	0	0.0238761	0	0	0	0	0	0	0	0	0	0	0	0	0.00619972	0.00795872	0	0	0	0
226421	Rab7b	No_BS	No_BS	No_BS	0.109512	0.125026	0.0715276	0.0247428	0.0665632	0.100312	0.148303	0.115307	0.131202	0.240464	0.0528553	0.102226	0.283539	0.140402	0.18337	0.214681	0.135142	0.055674	0.102022	0.0638727	0.131604	0.131848	0.202437	0.135166
320718	Slc26a9	No_BS	No_BS	No_BS	0.180278	0.205817	0.334652	0.22295	0.24222	0.250306	0.0822348	0.129875	0.233846	0.188896	0.207602	0.342472	0.133998	0.0851525	0.17794	0.0915708	0.0468357	0.115768	0.240249	0.238492	0.148652	0.246323	0.132363	0.0847249
212933	Pm20d1	No_BS	No_BS	No_BS	1.26833	1.32548	1.55485	1.83398	1.80273	1.22969	1.55375	2.23942	2.00376	2.22796	2.10956	1.74859	1.5891	1.86373	2.05184	2.17739	2.53315	1.57395	1.38288	1.62214	1.93231	2.0287	1.83489	2.09483
98396	Slc41a1	No_BS	No_BS	No_BS	8.95855	7.5375	9.05031	7.80827	7.03499	7.34121	7.65837	6.35859	6.72655	8.21762	6.6472	7.98669	7.16471	4.95898	6.67016	7.27635	5.62543	4.83186	8.51546	7.39482	6.9145	7.61717	6.26462	5.91121
226422	Rab29	No_BS	No_BS	No_BS	4.20482	4.99913	5.60636	3.59041	4.19495	6.71499	4.46112	3.57237	4.16904	3.80348	2.98582	4.87248	2.97593	3.60629	4.5837	3.63823	3.54992	5.03207	4.93677	4.83345	4.06751	3.88726	3.72197	4.07341
98415	Nucks1	No_BS	No_BS	No_BS	89.2615	97.767	132.44	113.034	111.105	158.437	97.765	69.4667	117.314	127.137	97.1279	130.601	91.1174	70.9006	99.1921	115.692	79.3569	130.949	106.489	127.526	94.8487	118.289	87.07	108.666
212980	Slc45a3	No_BS	No_BS	No_BS	1.23844	1.16503	1.25538	1.28935	1.36095	1.37942	0.933811	1.81512	0.99027	1.12543	2.05297	0.826181	0.820848	2.18475	0.836102	1.03982	2.02466	0.846178	1.21962	1.34324	1.2464	1.33486	1.28057	1.30355
13714	Elk4	No_BS	No_BS	No_BS	1.6088	1.21373	0.909449	1.69201	0.972134	0.689423	1.38619	1.21844	0.656968	2.10438	1.16244	1.03045	1.63868	1.12176	0.680543	1.8273	1.49538	0.548444	1.24399	1.11786	1.0872	1.43242	1.14699	1.29037
213006	Mfsd4	No_BS	No_BS	No_BS	0.427004	0.422495	0.269599	0.411628	0.346052	0.260753	0.385502	0.389651	0.214373	0.641735	0.393861	0.318875	0.375219	0.246351	0.276461	0.592389	0.421551	0.183312	0.373033	0.339478	0.329842	0.45149	0.299344	0.399084
18557	Cdk18	No_BS	No_BS	No_BS	5.46522	2.7961	3.31779	4.30383	3.11509	2.4428	3.39036	3.77259	4.06752	2.69551	2.58302	3.45752	4.70778	2.82015	4.57175	3.09134	3.45889	2.76688	3.8597	3.28724	3.74349	2.91202	4.03323	3.10571
213409	Lemd1	No_BS	Merged-chr1-132200953-1 (+9517)	No_BS	0.316213	0.0401121	0	0.0952584	0.213554	0.102986	0.152256	0.0739876	0.14432	0.205727	0.18088	0.131188	0.165396	0.0450451	0.42358	0.127156	0.0693722	0.381053	0.118775	0.137266	0.123521	0.172599	0.21134	0.192527
723818	Mir135b	No_BS	No_BS	No_BS	0	0	0	0.321784	0	0	0	0	0	0	0	0	0	0	0	0	0	0	0	0.107261	0	0	0	0
213417	Klhdc8a	No_BS	No_BS	No_BS	0.28316	0.147782	0.0528414	0.0292462	0.127852	0.0592849	0.289238	0.178886	0.210468	0.189487	0.0833007	0.140971	0.693143	0.22819	0.162559	0.224476	0.167727	0.087743	0.161261	0.0721278	0.226197	0.13792	0.361297	0.159982
74137	Nuak2	No_BS	Merged-chr1-132360960-2 (+44834)	No_BS	2.85607	1.83806	1.97347	2.55125	2.01076	2.1333	2.77162	2.32215	3.03482	3.46089	2.68241	4.37821	3.06272	2.40341	3.10201	3.55188	3.87558	3.99152	2.22253	2.23177	2.70953	3.50717	2.85605	3.80633
68875	Tmcc2	No_BS	Merged-chr1-132360960-2 (+30321)	No_BS	3.30182	2.46294	1.2569	3.68881	3.10268	2.31564	2.90776	2.42077	1.55318	3.94971	2.93301	2.45815	3.12771	1.84389	2.08936	4.30087	2.27976	2.95211	2.34055	3.03571	2.2939	3.11362	2.35365	3.17758
213452	Dstyk	No_BS	Merged-chr1-132417561-2 (+108)	No_BS	3.781	3.34709	3.22207	2.89887	2.45267	2.75879	2.90662	2.32371	2.63662	2.86954	2.01893	2.51117	2.69403	1.92097	2.55052	2.86465	2.02389	2.33193	3.45005	2.70344	2.62231	2.46655	2.3885	2.40682
213464	Rbbp5	No_BS	No_BS	No_BS	24.4862	29.2252	34.483	20.3761	25.4891	25.9359	23.6019	19.3138	25.6234	19.6885	16.657	23.9193	20.314	19.9086	20.3553	15.2916	15.9404	17.4293	29.3981	23.9337	22.8464	20.0883	20.1926	16.2204
74626	Tmem81	No_BS	No_BS	No_BS	3.03343	3.30471	4.9985	2.27557	2.98858	4.18422	1.78278	1.85791	4.56057	1.71814	1.55656	3.65209	1.38131	1.52512	3.69159	1.29156	1.78116	3.11787	3.77888	3.14946	2.73375	2.30893	2.19934	2.06353
21367	Cntn2	chr1-130 (-193569), chr1-151 (-44191)	Merged-chr1-132736548-2 (-193608), Merged-chr1-132656507-1 (-113567)	Merged-chr1-132736487-2 (-193547)	0.905545	0.566538	0.430578	1.18174	0.678096	0.429996	0.643562	0.73607	0.39676	0.780499	0.759892	0.595088	0.624077	0.37151	0.494909	0.406378	0.328985	0.117853	0.63422	0.763278	0.59213	0.711826	0.496832	0.284405
269116	Nfasc	chr1-85 (-111712), chr1-241 (-68302), chr1-130 (+5288), chr1-151 (+154666)	Merged-chr1-132736548-2 (+5249), Merged-chr1-132656507-1 (+85290)	Merged-chr1-132736487-2 (+5310)	1.2279	0.706621	0.752006	3.58473	1.71919	1.19484	1.08152	1.38396	1.30763	4.45416	3.43482	2.73348	1.11219	0.836183	1.29713	4.21906	2.5854	1.75486	0.895508	2.16625	1.2577	3.54082	1.08184	2.85311
100038653	Gm10538	No_BS	No_BS	No_BS	0	0	0	0.0498345	0.0223442	0.0269385	0	0	0	0	0	0	0	0	0	0.0221739	0.018146	0	0	0.0330391	0	0	0	0.01344
16980	Lrrn2	chr1-241 (-70174), chr1-85 (-26764), chr1-50 (+10602)	No_BS	Merged-chr1-132890878-2 (+10605), Merged-chr1-132985611-1 (+105338)	1.68249	2.81644	2.92593	0.932845	1.50573	1.86071	1.59911	0.825981	0.890375	0.689008	0.531397	0.616656	1.19533	0.569041	0.912566	0.460727	0.305706	0.307854	2.47496	1.4331	1.10515	0.612354	0.892311	0.358096
17248	Mdm4	chr1-50 (+134473)	No_BS	Merged-chr1-132985611-1 (+39737), Merged-chr1-132890878-2 (+134470)	24.3462	23.5916	32.883	26.5018	23.236	21.7502	19.7413	26.2377	30.7242	23.6109	20.1585	23.7142	19.4287	16.6062	25.1516	20.3904	22.9087	23.0098	26.9403	23.8293	25.5677	22.4945	20.3955	22.103
240752	Pik3c2b	No_BS	No_BS	No_BS	1.42436	0.54702	0.69987	1.05106	0.571869	0.478788	0.726724	0.623739	0.518871	0.556011	0.291521	0.455396	0.488018	0.295977	0.460951	0.562255	0.516026	0.460601	0.890417	0.700573	0.623111	0.434309	0.414982	0.512961
108954	Ppp1r15b	No_BS	No_BS	No_BS	35.8107	40.5662	32.3837	34.7599	31.9995	32.818	34.3367	32.2716	29.4836	32.1295	29.6873	29.5933	34.2508	34.929	30.1116	29.8617	27.836	29.1422	36.2536	33.1925	32.0306	30.47	33.0971	28.9466
240753	Plekha6	No_BS	No_BS	No_BS	0.555786	0.470603	0.38116	0.410202	0.405378	0.257941	0.376326	0.721738	0.37415	0.406792	0.667635	0.357401	0.418615	0.546291	0.428086	0.446986	0.45724	0.156973	0.469183	0.35784	0.490738	0.477276	0.464331	0.353733
100502933	Gm19461	No_BS	No_BS	No_BS	0.0110982	0	0	0.0200598	0	0.0487957	0	0	0	0.0129968	0.0142839	0	0	0	0.0148664	0.0133884	0	0	0.00369939	0.0229518	0	0.00909354	0.00495548	0.0044628
68338	Golt1a	No_BS	No_BS	No_BS	0	0.107031	0.024493	0	0.113965	0.0549592	0.0812526	0.592262	0.051345	0.0219576	0.33785	0.0233366	0	0.721161	0	0	0.296169	0	0.0438413	0.0563081	0.24162	0.127715	0.240387	0.0987229
280287	Kiss1	No_BS	No_BS	No_BS	0.069632	0	0.636718	0	0	0.102051	0.0754372	0.219949	0.190681	0	0	0.0866655	0.065558	0	0.0932749	0	0.0687428	0.471994	0.23545	0.0340171	0.162022	0.0288885	0.0529443	0.180246
19702	Ren2	No_BS	No_BS	No_BS	0	0.0258559	0	0	0	0	0	0	0	0	0	0	0	0	0	0	0	0	0.00861862	0	0	0	0	0
19701	Ren1	No_BS	No_BS	No_BS	0	0	0	0	0	0	0	0	0	0	0	0	0	0	0	0	0	0	0	0	0	0	0	0
214253	Etnk2	No_BS	No_BS	No_BS	5.63506	4.73854	5.40205	2.4368	3.25934	2.90828	3.82374	3.60459	4.47999	1.50785	1.73516	2.54523	3.80789	3.06848	4.44381	1.69948	1.645	2.01252	5.25855	2.86814	3.96944	1.92942	3.77339	1.78567
20668	Sox13	No_BS	No_BS	No_BS	10.0747	9.86034	7.2063	12.7557	11.1531	8.05636	9.74893	7.89914	6.01322	12.2564	9.11435	8.57044	8.19596	5.22925	6.81321	11.2215	8.51686	6.39143	9.0471	10.6551	7.8871	9.98038	6.74614	8.70993
20643	Snrpe	No_BS	No_BS	No_BS	560.392	450.562	591.277	556.759	357.297	695.681	506.876	310.358	704.911	397.883	341.787	545.714	498.789	367.014	659.079	399.71	295.364	751.433	534.077	536.579	507.382	428.461	508.294	482.169
70579	Zc3h11a	No_BS	No_BS	No_BS	38.2479	33.6498	53.8302	41.615	32.4752	44.4545	32.4508	33.7197	46.9501	37.4134	31.9059	44.0636	34.1324	28.5417	43.1269	40.5177	33.2951	44.5897	41.9093	39.5149	37.7069	37.7943	35.267	39.4675
667118	Zbed6	No_BS	No_BS	No_BS	8.89821	4.83526	2.57703	10.2485	4.83827	2.43635	6.00822	7.14661	2.38002	10.7678	5.74396	2.89321	7.29955	4.10337	2.68882	10.0521	6.20368	1.52426	5.43683	5.84103	5.17828	6.46833	4.69725	5.92669
240754	Lax1	chr1-152 (-108560), chr1-242 (-103189), chr1-66 (-3674)	Merged-chr1-133798679-1 (-108571), Merged-chr1-133693716-2 (-3608)	Merged-chr1-133798728-2 (-108620)	0.233066	0.382495	0.494735	0.250125	0.283322	0.341577	0.0946862	0.153374	0.239336	0.085293	0.131236	0.290079	0.0960006	0.0747015	0.273176	0.123008	0.0862836	0.177729	0.370099	0.291675	0.162465	0.168869	0.147959	0.129007
381290	Atp2b4	chr1-152 (+2373), chr1-242 (+7744)	Merged-chr1-133798679-1 (+2362)	Merged-chr1-133893351-2 (-92310), Merged-chr1-133798728-2 (+2313)	0.966316	0.708526	0.7182	2.24725	1.17468	0.720316	0.527951	0.68853	0.541779	3.65828	2.24615	1.60705	0.654884	0.60876	0.362661	5.86381	3.20733	1.19144	0.797681	1.38075	0.586087	2.50383	0.542102	3.42086
102466206	Mir6903	No_BS	No_BS	No_BS	0	0	0	0	0	0	0	0	0	0	0	0	0	0	0	0	0	0	0	0	0	0	0	0
269120	Optc	No_BS	No_BS	Merged-chr1-133893351-2 (+13821)	0.0166606	0	0	0.0903415	0	0.0244175	0.0180496	0.0175422	0.0684353	0.0390217	0.042886	0.0207362	0.0470576	0.02136	0	0.0401975	0.0493436	0	0.00555354	0.038253	0.0346757	0.0342146	0.0228059	0.029847
116847	Prelp	No_BS	No_BS	No_BS	0.00958842	0.0985208	0	0.00866546	0.0466238	0	0.0207756	0.040383	0	0.0336863	0.0617037	0	0.00902742	0.0614649	0.0128441	0.0231342	0.132524	0.0129988	0.0360364	0.0184298	0.0203862	0.0317967	0.0277788	0.0562189
14264	Fmod	chr1-76 (+24086), chr1-67 (+30129)	Merged-chr1-134061175-2 (+23921)	Merged-chr1-134061295-2 (+24041), Merged-chr1-134063389-2 (+26135)	0	0.0275832	0	0	0.0293702	0	0	0.0254389	0	0	0.0310957	0	0	0.0154877	0.016182	0.0145732	0.05963	0	0.0091944	0.00979007	0.00847963	0.0103652	0.0105566	0.0247344
12227	Btg2	chr1-67 (+11737), chr1-76 (+17780)	Merged-chr1-134061175-2 (+17945)	Merged-chr1-134063389-2 (+15731), Merged-chr1-134061295-2 (+17825)	11.3146	11.7408	15.4094	21.6051	16.8593	18.2242	10.8258	19.132	21.7961	26.9465	35.0507	32.1943	11.5807	24.7751	27.5215	29.4477	30.3141	38.9245	12.8216	18.8962	17.2513	31.3971	21.2925	32.8955
71884	Chit1	No_BS	No_BS	No_BS	0.0186588	0.0213021	0.219365	0.0337256	0.0226822	0.382844	0.0808576	0.0785843	0.485406	0.0655526	0.0720443	0.209009	0.12297	0.239218	0.149965	0.0225093	0.0184205	0.0505909	0.0864419	0.146417	0.214949	0.115535	0.170718	0.0305069
12654	Chil1	No_BS	No_BS	No_BS	0.163588	0.233453	0.32054	0.203282	0.22372	0.209782	0.088613	0.193774	0.279981	0.119733	0.210545	0.152704	0.0577563	0.235947	0.136958	0.246683	0.262435	0.304938	0.239194	0.212261	0.187456	0.160994	0.143554	0.271352
53311	Mybph	No_BS	No_BS	No_BS	0	0	0	0.0511968	0.022955	0.0276749	0.0409151	0	0.025855	0	0	0	0	0	0	0.1139	0.0186421	0	0	0.0339423	0.0222567	0	0	0.0441808
11539	Adora1	No_BS	No_BS	No_BS	0.0712235	0.352358	0.0155065	0.0590038	0.144302	0.0434932	0.231484	0.84991	0.0731396	0.166816	0.45834	0.0664848	0.117349	1.3697	0.0318023	0.107402	0.69728	0.0241391	0.146363	0.0822664	0.384844	0.230547	0.506283	0.276274
17928	Myog	No_BS	Merged-chr1-134291070-1 (+1066)	No_BS	0.0700084	0.026642	0.0304838	0.0421797	0.0283681	0.034201	0.0252816	0.0737126	0.223663	0.0273284	0.0600694	0.0290447	0.0439416	0.0299184	0.0312597	0.422277	0.184305	0.189818	0.0423781	0.0349163	0.107552	0.0388141	0.0350399	0.265467
68507	Ppfia4	No_BS	Merged-chr1-134291070-1 (+41858)	No_BS	2.66987	1.53379	2.20858	2.52091	1.5086	1.52678	1.46781	1.97798	1.87846	1.75997	1.49466	2.08306	1.72044	1.11665	1.80726	1.89541	2.06815	1.4586	2.13741	1.8521	1.77475	1.77923	1.54812	1.80739
57439	Tmem183a	No_BS	No_BS	No_BS	29.7966	37.7878	38.1828	31.3213	34.7643	36.7691	37.5231	37.5927	39.2904	34.4984	35.8949	37.9536	38.9914	44.7683	37.2859	32.4745	34.6344	40.3504	35.2557	34.2849	38.1354	36.1157	40.3486	35.8198
240755	4933406M09Rik	No_BS	No_BS	No_BS	0.0390254	0.0222769	0.0254893	0.0176345	0.0237202	0	0.0211395	0.0616354	0.106867	0.0457017	0	0.0242859	0.0367421	0.0500331	0.026138	0.0235394	0.077054	0	0.0289305	0.0137849	0.0632141	0.0233292	0.0376378	0.0335311
72017	Cyb5r1	No_BS	No_BS	No_BS	35.026	33.9982	34.4336	38.8531	37.2595	29.0443	44.7115	49.314	31.1187	48.953	43.7679	39.4436	43.9756	52.8846	38.5536	60.4471	63.8521	48.5496	34.4859	35.0523	41.7147	44.0548	45.138	57.6163
72674	Adipor1	No_BS	Merged-chr1-134443511-1 (+28055)	Merged-chr1-134419515-2 (+4059)	41.2887	61.7984	36.9381	40.8539	60.3957	37.6254	50.8079	54.0305	35.4117	45.2788	52.96	40.1436	50.3689	61.9371	38.6565	45.2294	55.4166	39.3396	46.6751	46.2917	46.7501	46.1275	50.3208	46.6618
240756	Klhl12	No_BS	Merged-chr1-134443511-1 (-12020)	Merged-chr1-134419515-2 (-36016)	13.1731	14.336	16.1915	13.7411	14.3584	14.6024	14.564	14.3821	14.5299	14.1358	14.4091	14.3242	14.0811	15.2955	14.2586	12.3456	14.1571	13.2877	14.5669	14.234	14.492	14.2897	14.545	13.2634
98710	Rabif	chr1-243 (+18190)	No_BS	No_BS	22.6548	29.8897	33.5779	22.5613	29.34	32.3497	25.6513	25.9511	31.9604	22.0295	25.1414	30.6981	24.8648	26.6489	26.0015	20.5452	22.0696	25.6696	28.7074	28.0837	27.8542	25.9564	25.8384	22.7614
71001	Mgat4e	chr1-243 (+36832)	No_BS	No_BS	0.263933	0.193707	0.172387	0.272603	0.435431	0.110518	0.245088	0.158799	0.232314	0.0220775	0.0727915	0.11732	0.248491	0.12085	0.126267	0.136456	0.204727	0.0766733	0.210009	0.272851	0.212067	0.0707297	0.165203	0.139286
75605	Kdm5b	No_BS	Merged-chr1-134555583-2 (-4588)	No_BS	77.3694	79.6302	84.947	80.0787	88.008	82.3377	78.7951	62.4206	68.6588	90.156	68.2505	82.7858	74.6234	50.4925	62.2733	75.142	61.4656	56.7882	80.6489	83.4748	69.9582	80.3974	62.463	64.4652
20980	Syt2	No_BS	No_BS	No_BS	0.0306003	0.104806	0.159891	0.036873	0.049598	0.0747452	0.0221009	0.0644387	0.0837958	0.0597253	0.0525119	0.0380857	0.0096033	0	0.0546537	0.02461	0.0604189	0.0138281	0.0984324	0.0537387	0.0567785	0.0501076	0.021419	0.0329523
329251	Ppp1r12b	No_BS	Merged-chr1-134955779-2 (+72)	No_BS	0.575159	0.395258	0.488727	0.625774	0.475171	0.458299	0.483969	0.452724	0.37464	0.608161	0.395283	0.361403	0.436361	0.307843	0.374004	0.532176	0.358329	0.317949	0.486381	0.519748	0.437111	0.454949	0.372736	0.402818
67196	Ube2t	No_BS	No_BS	No_BS	40.1769	38.9082	43.4038	41.2408	40.6507	60.2674	36.261	32.9306	63.2743	36.2693	39.5472	54.3302	32.8612	42.5597	58.3102	36.0751	43.8769	63.8893	40.8296	47.3863	44.1553	43.3822	44.577	47.9471
329252	Lgr6	No_BS	No_BS	No_BS	0.324117	0.1306	0.311317	0.215381	0.173826	0.111769	0.25819	0.281042	0.287152	0.424219	0.233115	0.130513	0.332079	0.219991	0.370319	0.264501	0.131755	0.077541	0.255344	0.166992	0.275462	0.262616	0.307463	0.157933
13924	Ptprv	No_BS	No_BS	No_BS	0.886159	0.849565	1.29115	0.852197	0.890795	1.03233	0.855418	1.8003	1.52444	0.911365	1.17708	1.22312	0.866401	0.903065	1.83383	0.97309	1.15524	1.25526	1.00896	0.925107	1.39339	1.10386	1.2011	1.12786
320139	Ptpn7	No_BS	No_BS	No_BS	0.603136	0.36241	0.414669	0.363387	0.488793	0.480742	0.447076	0.568201	0.753375	0.32218	0.299611	0.316074	0.408452	0.6376	0.708706	0.421242	0.470079	0.344278	0.460072	0.444307	0.589551	0.312622	0.584919	0.411867
68724	Arl8a	No_BS	No_BS	No_BS	18.2631	19.0896	15.2684	17.5871	20.055	15.8514	18.3567	27.1989	18.3654	18.9397	23.9755	19.4725	21.1875	29.5282	25.2252	19.4125	26.3236	19.477	17.5404	17.8312	21.307	20.7959	25.3136	21.7377
171469	Gpr37l1	No_BS	No_BS	No_BS	0.0306591	0.0350024	0.0200249	0.110832	0.0745401	0.0674001	0.0498227	0.0322813	0.167914	0.0718082	0.217028	0.190795	0.043298	0.0589604	0.0616036	0.036986	0.0454014	0.062346	0.0285621	0.0842573	0.0833393	0.159877	0.0546207	0.0482444
13710	Elf3	chr1-16 (+9817)	Merged-chr1-135248717-2 (+9755)	No_BS	14.5921	21.588	22.4452	18.6498	29.5153	25.5365	10.5703	16.546	16.3619	19.9601	18.9363	34.2814	11.2508	20.3021	15.7761	13.8118	14.866	19.7822	19.5418	24.5672	14.4927	24.3926	15.7763	16.1534
215615	Rnpep	No_BS	No_BS	No_BS	16.4207	12.3551	10.9212	12.6426	11.4039	8.8872	14.5374	15.7881	11.6938	13.0953	14.5273	11.4704	15.8698	16.6071	13.6521	12.331	13.9438	10.7847	13.2323	10.9779	14.0064	13.031	15.3763	12.3532
21854	Timm17a	No_BS	No_BS	No_BS	76.57	98.769	110.994	79.0707	102.146	105.596	79.6893	96.6029	101.694	81.6417	108.923	105.426	79.6076	118.931	84.1537	76.0142	93.6629	104.06	95.4444	95.6041	92.6621	98.6635	94.2308	91.2457
93689	Lmod1	No_BS	No_BS	No_BS	0.56073	0.420109	0.183119	0.554264	0.244964	0.205449	0.484084	0.405899	0.335892	0.471972	0.507435	0.567041	0.874373	0.471773	0.352088	0.443916	0.510322	0.237554	0.387986	0.334892	0.408625	0.515483	0.566078	0.397264
77552	Shisa4	No_BS	No_BS	No_BS	2.35087	1.98808	0.87199	1.44262	1.5171	1.10593	2.60975	4.33934	2.583	2.95697	3.69805	1.66165	3.6069	7.70236	3.49898	2.24079	5.50127	1.92796	1.73698	1.35521	3.17736	2.77222	4.93608	3.22334
226432	Ipo9	No_BS	No_BS	No_BS	31.7129	29.4588	24.3016	34.1911	31.7646	22.0376	30.5347	31.1224	20.8917	32.6953	30.9862	24.5605	29.967	29.155	20.6246	32.0236	31.0619	18.9059	28.4911	29.3311	27.5163	29.414	26.5822	27.3304
215690	Nav1	chr1-244 (-10383), chr1-19 (+19625)	Merged-chr1-135698532-2 (-10427), Merged-chr1-135668437-2 (+19668)	Merged-chr1-135698544-2 (-10439)	3.39234	1.83454	1.82344	4.73072	2.92022	1.86341	2.39149	2.79138	1.4853	4.67598	3.58967	2.30974	2.31007	1.80696	1.17772	3.72688	3.27691	1.28359	2.35011	3.17145	2.22272	3.52513	1.76492	2.76246
100885827	Mir1231	No_BS	No_BS	No_BS	0	0	0	0	0	0	0	0	0	0	0	0	0	0	0	0	0	0	0	0	0	0	0	0
13007	Csrp1	chr1-244 (-21573)	Merged-chr1-135698532-2 (-21529)	Merged-chr1-135698544-2 (-21517)	59.6113	59.3235	29.1342	42.9928	55.8136	37.2338	48.4305	78.2975	49.6132	40.5145	72.8801	48.499	89.2099	119.504	68.6385	54.1406	90.0184	55.181	49.3564	45.3468	58.7804	53.9645	92.4508	66.4467
27280	Phlda3	No_BS	No_BS	No_BS	36.5857	40.5591	54.8035	28.2555	29.3063	53.4468	32.7748	48.5113	66.7265	26.6883	39.0881	45.8577	36.7282	57.9223	96.25	31.1562	41.3015	76.3448	43.9828	37.0029	49.3375	37.2114	63.6335	49.6009
21952	Tnni1	No_BS	No_BS	No_BS	0.434044	0.318556	0.769483	0.224151	0.489948	1.0905	0.201527	0.587584	0.679193	0.181535	0.359122	0.694569	0.321081	0.39748	0.747538	0.336609	0.367286	0.798577	0.507361	0.601533	0.489434	0.411742	0.4887	0.500824
16763	Lad1	No_BS	No_BS	No_BS	7.69937	8.57923	5.17206	3.81817	6.74955	2.70681	5.5525	7.8272	5.97432	2.67657	4.32331	3.85036	8.45523	7.47361	8.02513	4.14976	6.18795	4.08439	7.15022	4.42484	6.45134	3.61675	7.98466	4.80737
21956	Tnnt2	No_BS	No_BS	No_BS	0.193101	0.535394	0.108105	0.274236	0.637149	0.121288	1.37474	0.668045	0.302165	1.97061	0.603573	0.103002	1.6622	0.601236	0.110857	1.89688	0.46297	0.186988	0.278867	0.344224	0.78165	0.892395	0.791431	0.848945
18772	Pkp1	No_BS	No_BS	No_BS	0	0.00878961	0	0.0417472	0.0187181	0.0338503	0.0250224	0.0243189	0.0210828	0.0360642	0.00990891	0.0383291	0.0217455	0.0197411	0.0309391	0.0185754	0	0	0.00292987	0.0314385	0.0234747	0.0281007	0.0241419	0.00619181
226438	Igfn1	No_BS	No_BS	No_BS	0	0	0	0.00346965	0	0	0.00415927	0	0	0	0	0	0	0	0	0	0.00758035	0	0	0.00115655	0.00138642	0	0	0.00252678
66241	Tmem9	No_BS	No_BS	No_BS	27.4326	34.3155	23.6924	26.0227	32.4842	26.9574	24.8875	24.8112	25.5359	20.7083	24.8674	23.016	25.9205	32.0329	30.1908	23.237	28.3098	29.2971	28.4802	28.4881	25.0782	22.8639	29.3814	26.948
226439	Ascl5	No_BS	No_BS	No_BS	0.0609127	0	0	0	0.0740472	0	0.0659909	0.0641356	0	0	0	0.0758132	0.0573488	0	0	0	0	0	0.0203042	0.0246824	0.0433755	0.0252711	0.0191163	0
12292	Cacna1s	No_BS	No_BS	No_BS	0.573786	0.327535	1.03061	0.623263	0.462771	0.679212	0.286902	0.336927	0.710087	0.368278	0.234328	0.466942	0.337634	0.155614	0.753828	0.559079	0.315909	0.658198	0.643976	0.588415	0.444639	0.356516	0.415692	0.511062
329253	Gm15850	No_BS	No_BS	No_BS	0.0679872	0.0776185	0	0	0	0	0	0	0	0	0	0	0	0	0	0	0.0671189	0	0.0485352	0	0	0	0	0.022373
16565	Kif21b	No_BS	No_BS	No_BS	2.60196	1.42258	0.915283	2.51922	1.66208	1.0935	1.89156	2.34085	1.13049	2.51928	2.25206	1.81485	2.01826	1.30133	1.34952	2.62261	2.40047	1.04231	1.64661	1.75827	1.78763	2.1954	1.55637	2.0218
67313	5730559C18Rik	No_BS	No_BS	No_BS	5.42192	3.59884	2.12628	6.52645	4.38938	2.93994	4.71902	4.87601	3.0762	5.30241	5.03084	4.10886	5.39608	3.99733	4.00763	6.92798	5.62427	4.25794	3.71568	4.61859	4.22374	4.81403	4.46701	5.6034
383563	Gpr25	No_BS	No_BS	No_BS	0.0881058	0.0402349	0.0230184	0.079625	0.0214208	0	0	0.0185535	0.0241269	0.0825428	0.0680378	0.0219317	0.0497706	0.0677744	0.0472085	0.0212575	0.0347923	0.0238887	0.050453	0.0336819	0.0142268	0.0575041	0.0549178	0.0266462
67886	Camsap2	No_BS	No_BS	No_BS	6.3574	5.54936	5.94588	6.64319	4.97505	5.66154	5.51471	5.98721	5.80305	6.88145	5.81282	5.38494	6.11014	4.66962	5.56497	7.36575	5.91446	5.70385	5.95088	5.75993	5.76833	6.0264	5.44824	6.32802
320054	9230116N13Rik	No_BS	No_BS	No_BS	0.296459	0.507685	0.47332	0.491192	0.340363	0.579313	0.463919	0.589607	0.293159	0.366463	0.233173	0.430476	0.387658	0.401195	0.352994	0.397374	0.390231	0.312592	0.425821	0.470289	0.448895	0.343371	0.380616	0.366732
67997	Ddx59	No_BS	No_BS	No_BS	7.53376	9.29123	10.3475	8.15349	10.7788	10.0417	9.43818	8.25881	8.38378	8.3506	8.8384	9.0101	8.84433	9.91713	6.62402	7.6672	8.4935	7.85968	9.0575	9.65801	8.69359	8.73303	8.46183	8.00679
381293	Kif14	chr1-245 (+84970)	No_BS	No_BS	7.00857	5.65113	4.2205	7.98481	6.20355	4.04308	6.65946	6.26725	3.86795	7.32956	5.41114	4.42337	6.22803	5.17247	3.57885	7.64536	6.47742	3.47598	5.62673	6.07715	5.59822	5.72136	4.99312	5.86625
226442	Zfp281	chr1-245 (-71973)	Merged-chr1-136707433-2 (+82532), Merged-chr1-136720052-1 (+95151), Merged-chr1-136859649-2 (+234748), Merged-chr1-136949118-1 (+324217)	Merged-chr1-136707438-2 (+82537)	26.3794	27.3134	31.0638	30.8994	27.8492	35.4466	24.5	22.8599	32.6494	28.3237	27.3702	31.0152	24.0347	20.465	32.977	30.7331	26.5209	35.7355	28.2522	31.3984	26.6698	28.903	25.8256	30.9965
100503460	Gm19705	No_BS	No_BS	No_BS	5.79156	3.54791	10.3333	6.38303	3.77777	7.76341	5.05012	2.23097	6.28583	4.79727	3.6361	4.57112	4.52176	3.80313	8.13647	3.23775	2.23126	5.07476	6.5576	5.97473	4.52231	4.33483	5.48712	3.51459
100503474	Platr22	No_BS	No_BS	No_BS	4.72406	5.06443	5.53132	3.59249	5.21745	4.60159	6.64703	6.0962	5.99491	7.15141	6.56204	5.19848	6.69862	7.34911	6.79109	3.7877	5.34623	3.94412	5.1066	4.47051	6.24605	6.30398	6.94627	4.35935
26424	Nr5a2	No_BS	Merged-chr1-136949118-1 (+11309), Merged-chr1-136859649-2 (+100778), Merged-chr1-136720052-1 (+240375), Merged-chr1-136707433-2 (+252994)	Merged-chr1-136707438-2 (+252989)	14.3988	20.8959	13.4401	10.6903	14.6408	8.63528	10.4577	8.9663	7.36857	7.02587	5.38211	6.76499	9.45069	7.40476	5.8895	3.6512	2.66088	3.20481	16.2449	11.3221	8.93085	6.39099	7.58165	3.1723
735252	Mir181a-1	No_BS	No_BS	No_BS	0	0	0	0	0	0	0	0	0	0	0	0	0	0	0	0	0	0	0	0	0	0	0	0
723890	Mir181b-1	No_BS	No_BS	No_BS	0	0	0	0	0	0	0	0	0	0	0	0	0	0	0	0	0	0	0	0	0	0	0	0
19264	Ptprc	chr1-131 (+21042)	No_BS	No_BS	0	0.0208773	0.0318504	0.00550882	0.0148199	0	0.00660375	0.0385085	0.0500764	0.00713836	0.0470717	0.00758667	0.0401725	0.0312596	0.097983	0	0.0240709	0.0247909	0.0175759	0.00677624	0.0317296	0.0205989	0.0564717	0.0162873
338375	Atp6v1g3	No_BS	No_BS	No_BS	0	0	0	0	0	0.0268243	0.0198287	0	0.0250603	0	0	0.0227801	0	0	0	0	0	0	0	0.00894143	0.014963	0.00759337	0	0
59125	Nek7	No_BS	No_BS	No_BS	8.39324	9.96883	8.36376	9.89432	10.8267	8.5415	10.1601	10.7172	8.76655	11.0908	12.44	9.69294	9.53478	16.2463	9.04395	11.623	13.28	9.52851	8.90861	9.75418	9.88128	11.0746	11.6083	11.4772
545363	Gm5833	No_BS	No_BS	No_BS	0	0	0	0	0	0	0	0	0	0	0	0	0	0	0	0	0	0	0	0	0	0	0	0
16876	Lhx9	No_BS	No_BS	No_BS	0.0240261	0	0.0392313	0.0108567	0.0146034	0.00880303	0.00650728	0	0	0.0211022	0.0154613	0.00747584	0.0169653	0.0154015	0.00804597	0.0289841	0.0237192	0.0325717	0.0210858	0.011421	0.00216909	0.0146798	0.0134709	0.028425
69549	2310009B15Rik	No_BS	No_BS	No_BS	8.83095	10.082	8.21728	7.05162	7.64696	10.8149	10.7467	6.75075	11.1804	7.22502	5.29368	9.41027	8.54206	7.52205	12.5586	7.36976	6.26992	12.546	9.0434	8.5045	9.55927	7.30966	9.54091	8.72855
329260	Dennd1b	chr1-132 (-361)	No_BS	No_BS	3.48574	4.19299	4.13007	3.61204	3.71716	4.36578	3.53779	3.67455	4.68735	5.17191	4.60395	4.17813	3.66513	3.58474	3.96249	4.35542	3.96623	4.74808	3.93627	3.89833	3.96656	4.65133	3.73745	4.35658
78229	4930596I21Rik	No_BS	No_BS	No_BS	0.0750815	0.171436	0	0.135709	0.182542	0	0.0813409	0	0.102802	0	0	0	0.141377	0.0962593	0.201149	0	0	0	0.0821724	0.106084	0.0613809	0	0.146262	0
170788	Crb1	No_BS	No_BS	No_BS	0.0220358	0	0.00959507	0.026553	0.00892912	0	0.0159153	0.0232018	0.0402287	0.0430093	0.00945371	0.0365683	0.00691552	0.0282514	0.0295179	0	0.0435088	0.00995786	0.0105436	0.0118274	0.0264486	0.0296771	0.0215616	0.0178222
71209	4933436E23Rik	No_BS	No_BS	No_BS	0	0	0.0406085	0	0.0755801	0	0.0336785	0	0	0	0	0	0	0	0	0	0	0	0.0135362	0.0251934	0.0112262	0	0	0
226470	Zbtb41	No_BS	No_BS	No_BS	2.38731	2.73022	3.40987	2.83687	2.82174	3.74092	2.26416	2.62234	3.91905	2.74251	2.56225	3.33114	2.37596	2.45172	3.20343	2.78529	2.38129	3.71797	2.84247	3.13318	2.93519	2.87863	2.67704	2.96152
12316	Aspm	No_BS	No_BS	No_BS	13.8031	9.27205	15.0768	14.9137	10.0643	17.4539	11.8364	10.0367	16.5266	12.647	9.02453	13.0666	11.2157	6.02748	14.5789	12.7916	9.13753	13.3261	12.7173	14.1439	12.7999	11.5794	10.6074	11.7518
14060	F13b	No_BS	No_BS	No_BS	0	0.0497437	0.0189723	0	0	0.0212857	0.0629383	0.0152922	0.0198859	0	0	0	0.013674	0.0372408	0	0	0	0	0.0229053	0.00709524	0.0327055	0	0.0169716	0
50702	Cfhr1	No_BS	No_BS	No_BS	0.0199408	0.0227657	0.0781455	0	0.0242406	0.0584497	0	0.0419918	0	0.0233522	0.0513295	0	0.0187741	0.0766962	0.053423	0	0.0196862	0.0540668	0.040284	0.0275634	0.0139973	0.0248939	0.0496311	0.0245843
214403	Gm4788	No_BS	No_BS	No_BS	0.0358893	0.0273157	0.0625092	0.0540578	0.0727134	0.0175329	0.0129605	0.0125961	0.0327598	0.0420291	0.0153971	0.0446686	0.0112632	0	0.0320501	0.0577273	0.0590516	0	0.0419047	0.0481014	0.0194388	0.0340316	0.0144378	0.0389263
545366	Cfhr2	No_BS	No_BS	No_BS	0	0.0492262	0.0563246	0	0	0.0631928	0	0	0	0	0	0.0268328	0.0202976	0	0.0288791	0	0	0.0584542	0.0351836	0.0210643	0	0.00894426	0.0163922	0.0194847
12628	Cfh	No_BS	No_BS	No_BS	0.126598	0.162599	0.310076	0.143015	0.0673295	0.24352	0.0342881	0.0583171	0.130004	0.0926597	0.0203672	0.157566	0.12664	0.0710092	0.190781	0.104997	0.0937358	0.12872	0.199757	0.151288	0.0742029	0.0901978	0.129477	0.109151
240776	Kcnt2	No_BS	No_BS	No_BS	0.497507	0.587915	0.524472	0.631044	0.509292	0.422132	0.444425	0.569781	0.979955	0.582618	0.43811	0.716978	0.649185	0.458795	0.701506	0.515939	0.404986	0.449641	0.536632	0.520822	0.66472	0.579235	0.603162	0.456856
75910	4930590L20Rik	No_BS	No_BS	No_BS	0	0	0	0	0	0.183729	0	0	0.0858236	0.0734046	0	0	0	0	0.0839643	0	0	0	0	0.0612431	0.0286079	0.0244682	0.0279881	0
214498	Cdc73	No_BS	Merged-chr1-143555616-1 (+50992)	No_BS	33.1446	35.7787	28.1343	35.1642	33.5031	27.5391	31.6045	29.7926	26.3108	32.9851	33.0646	26.2122	32.2132	30.8037	27.2611	33.9167	29.271	31.0339	32.3526	32.0688	29.236	30.754	30.0927	31.4072
26878	B3galt2	No_BS	No_BS	No_BS	0.0226327	0.0258389	0.00985496	0.0272722	0.0275129	0.09951	0.0163464	0.0317736	0.0309887	0.0265046	0.00970977	0.0187794	0.00710283	0	0.0101058	0	0.0297915	0.0204552	0.0194422	0.0514317	0.0263696	0.0183313	0.00573621	0.0167489
69367	Glrx2	No_BS	No_BS	No_BS	4.43524	5.49697	6.45897	5.89114	6.68604	6.47306	4.33353	4.42618	4.61478	5.00966	5.21976	5.23209	4.13216	4.46354	4.93652	4.73615	5.19216	5.88725	5.46373	6.35008	4.45816	5.15383	4.51074	5.27185
20822	Trove2	No_BS	Merged-chr1-143777238-1 (-170)	No_BS	4.55483	4.55346	5.0859	5.64483	5.0218	5.9905	3.94336	4.37046	5.71045	5.40826	5.68896	5.09227	4.6948	4.40254	5.25249	5.27976	5.15356	6.37357	4.7314	5.55238	4.67475	5.3965	4.78327	5.6023
56207	Uchl5	No_BS	Merged-chr1-143777238-1 (-40)	No_BS	39.0716	42.9237	42.0937	33.9616	36.4956	36.4249	36.022	35.4219	36.6354	34.6555	36.1182	35.2063	37.1369	38.1314	34.1671	28.8344	31.7386	38.272	41.363	35.6274	36.0264	35.3267	36.4785	32.9483
19735	Rgs2	No_BS	No_BS	No_BS	0.321386	0.235874	0.314868	0.943962	0.544169	0.25233	0.435224	0.386732	0.518621	0.954358	1.00455	0.842865	0.507906	0.647487	0.522761	2.68626	1.64306	3.03432	0.290709	0.580154	0.446859	0.933924	0.559385	2.45455
246709	Rgs13	No_BS	No_BS	No_BS	0	0	0	0	0	0	0	0	0	0	0	0	0	0	0	0	0	0	0	0	0	0	0	0
50778	Rgs1	No_BS	No_BS	No_BS	0	0	0	0	0	0	0	0	0	0	0	0	0	0	0	0	0	0	0	0	0	0	0	0
624910	Rgs21	No_BS	No_BS	No_BS	0	0	0	0	0	0	0	0	0	0	0	0	0	0	0	0	0	0	0	0	0	0	0	0
64214	Rgs18	No_BS	No_BS	No_BS	0	0	0	0	0	0	0	0	0	0	0	0	0	0	0	0	0	0	0	0	0	0	0	0
215378	Brinp3	chr1-153 (-172603), chr1-30 (-68531)	Merged-chr1-146427008-2 (-68621)	No_BS	0.0108882	0.0248614	0.0568928	0.0393607	0	0.0478727	0.023592	0	0.0298164	0.0127509	0.042041	0.0135517	0.0102512	0	0.0145852	0.0131352	0.0214984	0	0.0308808	0.0290778	0.0178028	0.0227812	0.0082788	0.0115445
18783	Pla2g4a	No_BS	No_BS	No_BS	0.328282	0.413558	0.650641	0.450138	0.495395	0.630437	0.895257	0.703221	1.33295	1.14007	0.947013	0.676281	1.17235	1.26263	1.15244	1.06517	0.871688	0.920783	0.46416	0.525323	0.977143	0.921121	1.19581	0.952549
102465760	Mir7652	No_BS	No_BS	No_BS	0	0	0	0	0	0	0	0	0	0	0	0	0	0	0	0	0	0	0	0	0	0	0	0
320019	Ptgs2os	No_BS	No_BS	No_BS	0	0	0	0.0104252	0	0	0.0124973	0	0	0.027018	0.0148468	0	0.0325819	0	0.0154523	0.0278321	0.0113882	0	0	0.00347506	0.00416576	0.0139549	0.0160114	0.0130735
19225	Ptgs2	No_BS	No_BS	No_BS	0.324961	1.0464	0.282996	0.225908	0.617869	0.29308	2.28383	0.965051	0.559023	2.32235	0.772134	0.197041	3.31836	1.54897	0.580397	1.87969	0.748558	0.304991	0.551452	0.378953	1.2693	1.09718	1.81591	0.977745
102639566	Ptgs2os2	No_BS	No_BS	No_BS	0	0	0.0258545	0	0	0	0.0428846	0.0208395	0.0541992	0.162247	0.0509471	0	0.074537	0.0761249	0	0.0955065	0.0195395	0.053664	0.00861815	0	0.0393078	0.0710648	0.0502206	0.0562367
20028	Pdc	No_BS	No_BS	No_BS	0	0.03162	0.0361797	0.0500609	0	0.162365	0.0300055	0	0	0.0324346	0.0356466	0	0	0	0	0	0.0546855	0	0.0225999	0.0708088	0.0100018	0.0226937	0	0.0182285
75584	2310030A07Rik	No_BS	No_BS	No_BS	0.0566188	0	0.295843	0	0	0.165959	0.122678	0.0596146	0.155045	0	0	0.281876	0	0	0.0758432	0.0683028	0	0.307028	0.117487	0.0553196	0.112446	0.0939587	0.0252811	0.12511
226499	BC003331	No_BS	No_BS	No_BS	7.59569	7.74739	8.11309	7.16301	6.72118	8.79013	7.96348	7.13389	10.5751	6.51227	7.14348	7.67703	8.04394	9.58793	8.40521	6.88843	7.03593	8.31875	7.81872	7.55811	8.55748	7.11093	8.67903	7.41437
108989	Tpr	No_BS	No_BS	No_BS	48.5995	32.4268	48.8867	53.8807	34.6332	45.3345	50.6292	45.7331	46.4432	60.4332	41.6489	46.7267	52.8107	27.5705	42.2936	55.2181	36.8648	39.4544	43.3043	44.6161	47.6018	49.6029	40.8916	43.8458
96875	Prg4	No_BS	No_BS	No_BS	0.0484397	0.0368679	0.126553	0.043777	0.0392564	0.319465	0.0874634	0.0425022	0.254241	0.0850897	0.0623441	0.261253	0.0608074	0.0414019	0.227104	0.0584358	0.0239105	0.197006	0.0706201	0.134166	0.128069	0.136229	0.109771	0.0931175
545370	Hmcn1	No_BS	No_BS	No_BS	0.0264019	0.0172241	0.0246347	0.068173	0.01834	0.0248748	0.0633353	0.0516265	0.0361496	0.0684626	0.0558251	0.0281661	0.0319593	0.0435201	0.0303141	0.0932758	0.0633001	0.0460191	0.0227536	0.0371292	0.0503704	0.0508179	0.0352645	0.0675317
402734	C730036E19Rik	No_BS	No_BS	No_BS	0	0	0	0	0	0	0	0.0137746	0	0	0	0	0	0	0	0	0	0	0	0	0.00459153	0	0	0
117198	Ivns1abp	No_BS	No_BS	No_BS	51.0691	45.1056	51.1978	49.5306	45.6939	50.7179	44.7189	45.9597	61.9345	45.8098	44.0277	52.86	44.6985	47.989	53.6306	40.5728	48.1086	57.456	49.1242	48.6475	50.871	47.5659	48.7727	48.7125
66875	Swt1	No_BS	No_BS	No_BS	10.3292	8.80407	10.7132	10.4838	9.03107	14.4897	8.44633	8.30801	14.9808	9.31757	9.62224	12.2466	8.51039	9.06591	13.2941	8.82592	8.56129	12.8415	9.94884	11.3348	10.5784	10.3955	10.2901	10.0762
98685	Trmt1l	No_BS	No_BS	No_BS	17.677	23.0071	15.1177	17.7791	21.2523	14.0361	17.6063	13.9865	10.4514	16.6489	14.8116	12.0974	17.082	15.2859	12.2561	14.0237	13.4339	10.8226	18.6006	17.6892	14.0147	14.5193	14.8747	12.7601
102466847	Mir7682	No_BS	No_BS	No_BS	0	0	0	0	0	0	0	0	0	0	0	0	0	0	0	0	0	0	0	0	0	0	0	0
19821	Rnf2	No_BS	No_BS	No_BS	51.9431	54.1189	71.8906	42.6963	37.3953	76.6282	49.3536	40.9525	87.175	37.8012	37.8013	57.5798	46.5845	47.0138	78.411	43.1783	38.2402	76.0314	59.3175	52.2399	59.1604	44.3941	57.3364	52.4833
63913	Fam129a	No_BS	No_BS	No_BS	5.62034	5.03513	3.79117	3.95412	3.59199	2.87847	6.56386	7.07172	4.93417	5.60637	6.39856	5.34734	5.94366	4.51898	4.25176	6.14552	6.15449	3.79187	4.81555	3.47486	6.18992	5.78409	4.9048	5.36396
66967	Edem3	chr1-181 (+187936)	No_BS	No_BS	7.41583	6.62145	7.93151	7.68509	5.8298	7.12047	6.48166	6.32146	6.61642	6.98189	5.95018	6.70437	6.40094	4.88118	6.45207	8.04399	6.40728	7.01193	7.32293	6.87845	6.47318	6.54548	5.9114	7.1544
69399	1700025G04Rik	chr1-181 (+147010)	No_BS	Merged-chr1-152299295-1 (-208975), Merged-chr1-152203392-1 (-113072)	1.10829	1.13593	0.906576	1.02401	0.90822	0.622728	1.00505	1.50247	0.959932	0.970305	1.16665	0.780043	1.13345	1.79768	0.924907	1.12342	1.48564	0.796845	1.05027	0.851652	1.15581	0.972334	1.28535	1.1353
66637	Tsen15	No_BS	No_BS	Merged-chr1-152299295-1 (+87387), Merged-chr1-152203392-1 (+183290)	17.8484	25.2186	21.6015	18.0881	23.5144	19.6746	22.2782	22.5835	20.8455	20.9018	25.9169	18.1134	22.9513	29.9237	17.6148	19.8018	20.8133	20.4742	21.5562	20.4257	21.9024	21.644	23.4966	20.3631
269132	Colgalt2	chr1-114 (+173204)	No_BS	Merged-chr1-152565914-2 (+166084)	0.051091	0.0194429	0.0444931	0.0461731	0.0517563	0	0.0369002	0.0089657	0.0349769	0.0398875	0.0328782	0.0105981	0.00801696	0.0655019	0.0228128	0.0513618	0.0252192	0.0115438	0.0383423	0.0326431	0.0269476	0.027788	0.0321106	0.029375
19731	Rgl1	chr1-114 (+52183)	No_BS	Merged-chr1-152565914-2 (+59303)	0.568665	0.872394	0.232138	0.586197	0.637278	0.221378	0.712335	2.7973	0.158156	0.686759	1.79544	0.376004	0.7278	4.27186	0.273753	1.12549	3.54385	0.361373	0.557732	0.481618	1.2226	0.952733	1.75781	1.67691
71281	Apobec4	No_BS	No_BS	No_BS	0	0	0	0	0	0	0	0	0	0	0	0	0	0	0	0	0	0	0	0	0	0	0	0
67771	Arpc5	No_BS	No_BS	No_BS	44.2779	57.285	50.3482	35.5404	48.4473	48.0292	44.1625	55.6496	56.9609	39.4652	56.4722	51.8462	54.6117	80.2022	59.2388	48.671	65.353	66.6909	50.637	44.0056	52.2577	49.2612	64.6843	60.2383
17970	Ncf2	No_BS	No_BS	No_BS	1.23728	1.39737	1.84218	1.56305	2.02161	2.1838	1.29719	1.33076	1.31155	1.40221	1.47258	2.21885	0.914378	1.33043	1.14057	1.15557	1.30029	1.13628	1.49228	1.92282	1.31317	1.69788	1.12846	1.19738
226517	Smg7	No_BS	No_BS	No_BS	24.9314	24.5911	27.5275	26.5637	25.195	20.5589	25.783	27.3171	20.6406	31.5224	25.8622	24.2235	26.2159	19.6991	19.8047	29.8017	25.7254	19.3722	25.6833	24.1059	24.5803	27.2027	21.9066	24.9664
226518	Nmnat2	chr1-28 (+116683)	Merged-chr1-152956370-1 (+1269), Merged-chr1-153071737-2 (+116636)	Merged-chr1-153092064-2 (+136963), Merged-chr1-153184132-2 (+229031)	6.49057	3.60041	4.37894	3.97495	3.5552	3.92808	6.77523	5.5476	5.5517	5.58893	5.10065	5.80688	6.93039	5.82493	5.31891	6.12581	5.94784	4.68943	4.82331	3.81941	5.95818	5.49882	6.02475	5.58769
16782	Lamc2	chr1-28 (+114663)	Merged-chr1-153071737-2 (+114710), Merged-chr1-152956370-1 (+230077)	Merged-chr1-153184132-2 (+2315), Merged-chr1-153092064-2 (+94383)	6.00594	4.90205	4.8401	2.54467	2.81307	3.26406	4.60102	5.46459	5.14646	2.68648	3.17633	3.7875	8.58256	6.13085	6.52216	4.4295	4.97184	5.11377	5.24936	2.87393	5.07069	3.21677	7.07852	4.83837
226519	Lamc1	No_BS	No_BS	No_BS	43.2829	53.2892	26.5831	37.2738	48.2753	20.7663	50.3571	159.176	22.3725	44.2666	109.606	25.3281	51.2026	188.893	27.3204	48.2735	171.681	19.8664	41.0517	35.4385	77.302	59.7336	89.1386	79.9403
626058	E330020D12Rik	No_BS	No_BS	No_BS	1.05066	0.781072	1.38843	1.20347	0.965337	1.16383	0.555892	0.848986	1.03711	0.8155	0.770469	0.927539	0.598115	0.736161	1.04737	0.619002	0.578927	0.877806	1.07339	1.11088	0.813995	0.837836	0.793882	0.691912
71836	Shcbp1l	No_BS	No_BS	No_BS	0.354664	0.212094	0.507417	0.488419	0.266896	0.420781	0.384232	0.497906	0.231241	0.257114	0.173893	0.168161	0.302112	0.238177	0.542955	0.224113	0.350134	0.320541	0.358058	0.392032	0.371126	0.199722	0.361081	0.298263
13211	Dhx9	chr1-86 (-5934)	Merged-chr1-153493586-1 (-5926)	No_BS	123.97	102.948	155.231	134.196	108.771	157.24	123.939	111.791	140.441	147.299	116.048	155.87	130.821	92.5613	126.377	141.812	99.1996	123.637	127.383	133.402	125.39	139.739	116.587	121.549
74091	Npl	chr1-58 (-91922), chr1-86 (+56120)	Merged-chr1-153641628-2 (-91914), Merged-chr1-153493586-1 (+56128)	Merged-chr1-153641665-2 (-91951)	12.5792	17.6775	15.5639	15.0614	20.0797	24.6774	13.2546	25.8935	21.0322	12.6556	21.4178	19.67	10.2672	40.9654	16.8504	10.5721	22.4312	21.3585	15.2736	19.9395	20.0601	17.9145	22.6944	18.1206
67792	Rgs8	chr1-58 (-11389), chr1-247 (+24729), chr1-68 (+80447)	Merged-chr1-153641628-2 (-11397), Merged-chr1-153677804-2 (+24779), Merged-chr1-153705156-2 (+52131), Merged-chr1-153733446-2 (+80421)	Merged-chr1-153641665-2 (-11360), Merged-chr1-153677781-2 (+24756), Merged-chr1-153705072-2 (+52047), Merged-chr1-153733472-2 (+80447)	0.0357038	0.0407617	0.0233198	0.484006	0.122974	0.0436056	0.0257869	0.0313274	0.065181	0.292683	0.214445	0.103688	0.0616272	0.0991783	0.0557978	1.85208	0.881196	0.734112	0.0332618	0.216862	0.0407651	0.203605	0.0722011	1.1558
329271	C230024C17Rik	No_BS	No_BS	No_BS	0	0.0118161	0.0270399	0.0748289	0.0125816	0.0151685	0.0112127	0	0.0283421	0.0242409	0.0266415	0.0128817	0.0194886	0.0265384	0	0.0998854	0.0102177	0	0.012952	0.034193	0.0131849	0.0212547	0.0153423	0.036701
19734	Rgs16	chr1-247 (-62595), chr1-68 (-6877)	Merged-chr1-153677804-2 (-62545), Merged-chr1-153705156-2 (-35193), Merged-chr1-153733446-2 (-6903)	Merged-chr1-153677781-2 (-62568), Merged-chr1-153705072-2 (-35277), Merged-chr1-153733472-2 (-6877)	2.11514	1.21583	1.04337	8.90272	4.02766	2.44958	2.17931	1.74427	1.33664	6.99793	4.85443	4.30781	2.88264	1.74462	2.61537	48.4631	24.4151	25.3259	1.45812	5.12665	1.75341	5.38672	2.41421	32.7347
24014	Rnasel	No_BS	No_BS	No_BS	0.0725882	0.107733	0.066375	0.183683	0.123536	0.0319152	0.125824	0.405073	0.0397552	0.348526	0.308301	0.0632414	0.11618	0.502539	0.0486174	0.175135	0.422801	0.0590439	0.082232	0.113045	0.190217	0.240023	0.222446	0.218994
240816	Rgsl1	No_BS	No_BS	No_BS	0	0	0	0	0	0	0	0	0	0	0	0	0	0	0	0	0	0	0	0	0	0	0	0
240817	Teddm2	No_BS	No_BS	No_BS	0	0	0.0272769	0	0	0	0	0	0	0	0	0	0	0	0	0	0	0	0.00909231	0	0	0	0	0
433365	Teddm1b	No_BS	No_BS	No_BS	0.410022	0.514917	0.482047	0.469368	0.465205	0.460705	0.28133	0.345373	0.299415	0.304105	0.422173	0.272172	0.476106	0.420539	0.384468	0.263805	0.485742	0.240872	0.468995	0.465093	0.308706	0.332817	0.427038	0.33014
240819	Teddm1a	No_BS	No_BS	No_BS	0.0244081	0	0	0	0	0	0	0	0	0	0	0	0	0	0	0	0	0	0.00813604	0	0	0	0	0
102466257	Mir8114	No_BS	No_BS	No_BS	0	0	0	0	0	0	0	0	0	0	0	0	0	0	0	0	0	0	0	0	0	0	0	0
14645	Glul	No_BS	No_BS	No_BS	94.3598	132.97	87.114	85.6662	118.102	66.6304	110.784	148.089	71.9187	83.3703	113.781	73.2157	106.76	213.415	83.1835	75.7297	143.88	54.6616	104.815	90.1327	110.264	90.1223	134.453	91.4239
100503355	Zfp648	chr1-87 (-50990), chr1-248 (+156548)	No_BS	No_BS	0	0	0	0	0.022368	0	0	0	0	0.0215482	0	0	0	0	0.024648	0	0	0	0	0.007456	0	0.00718273	0.00821601	0
78112	4930452N14Rik	No_BS	No_BS	No_BS	0	0	0	0	0	0	0	0	0	0	0	0	0	0	0	0	0	0	0	0	0	0	0	0
75233	4930532M18Rik	No_BS	No_BS	No_BS	0	0	0	0	0	0	0	0	0	0	0	0	0	0	0	0	0	0	0	0	0	0	0	0
12290	Cacna1e	chr1-38 (-33635), chr1-9 (-33092), chr1-248 (+368185)	Merged-chr1-154759104-2 (-33184)	Merged-chr1-154815202-1 (-89282), Merged-chr1-154759030-2 (-33110)	0.00816039	0	0.0106598	0	0.00661333	0	0	0.00286405	0.0223464	0.00318547	0	0.00338553	0.00512196	0.00348738	0.0109312	0.00328146	0	0.0110629	0.00627341	0.00220444	0.0084035	0.00219034	0.0065135	0.00478145
15939	Ier5	chr1-38 (+340081), chr1-9 (+340624)	Merged-chr1-154759104-2 (+340532)	Merged-chr1-154815202-1 (+284434), Merged-chr1-154759030-2 (+340606)	1.72159	1.54344	0.979583	1.88042	1.32246	1.45506	2.03676	1.81268	2.44398	2.54797	2.13421	2.94461	3.08263	2.18011	2.94281	1.84752	1.96028	2.36257	1.41487	1.55264	2.09781	2.54226	2.73518	2.05679
15064	Mr1	No_BS	No_BS	No_BS	0	0.0471465	0	0	0	0	0.104391	0.0579751	0.0753907	0.193444	0.070867	0.0513983	0.0388802	0.0705927	0.0184393	0.116243	0.0543586	0.0746462	0.0157155	0	0.0792524	0.105237	0.0426374	0.0817492
58244	Stx6	chr1-154 (+53981)	No_BS	No_BS	10.4919	10.7435	7.57744	11.4494	11.32	7.12226	12.6295	11.9491	8.38467	11.4315	11.8224	9.5447	11.9144	11.6325	8.5605	10.7085	11.1621	8.79695	9.60426	9.96389	10.9878	10.9328	10.7025	10.2225
19775	Xpr1	chr1-249 (+102085)	No_BS	No_BS	3.30433	2.54072	2.24666	3.38607	2.70533	2.34199	2.49413	2.60937	1.61935	3.66874	2.83522	2.03947	2.414	1.89826	1.56008	3.14759	2.76746	1.54828	2.69724	2.81113	2.24095	2.84781	1.95745	2.48778
433367	Gm5532	No_BS	No_BS	No_BS	0.0197244	0	0	0.0178258	0	0.0289077	0.0213688	0	0	0.0230988	0	0	0.0371408	0	0.0528433	0.0475896	0.0194725	0.0534801	0.00657481	0.0155778	0.00712295	0.00769959	0.0299947	0.0401808
72482	Acbd6	No_BS	Merged-chr1-155594356-2 (+36227)	No_BS	19.4029	19.1466	19.9793	17.2138	19.5439	20.9559	20.5003	19.2311	19.6266	18.0361	18.1742	20.6519	19.9923	21.2732	20.2734	16.5844	19.0322	19.1193	19.5096	19.2379	19.786	18.9541	20.513	18.2453
16872	Lhx4	No_BS	Merged-chr1-155594356-2 (+147764)	No_BS	0.0186588	0	0.0243739	0.0168628	0	0.027346	0	0	0	0	0	0.0232232	0.0351343	0	0.0499885	0.0225093	0.0184205	0	0.0143442	0.0147363	0	0.00774106	0.0283742	0.0136433
104009	Qsox1	No_BS	No_BS	No_BS	3.47327	7.02728	3.22161	4.12335	6.23338	4.29217	5.26574	17.701	4.64305	5.5356	13.9663	4.98797	6.40467	27.4424	4.44611	5.81397	19.6199	3.97031	4.57406	4.88296	9.20326	8.16328	12.7644	9.80139
74081	Cep350	chr1-182 (-944)	No_BS	No_BS	2.55131	1.48748	1.32904	2.69979	1.58701	1.20961	1.9036	2.18348	1.28288	2.72335	2.07108	1.45042	2.06483	1.29108	1.24118	2.61442	2.13183	1.29132	1.78928	1.83214	1.78999	2.08162	1.53236	2.01252
208263	Tor1aip1	No_BS	No_BS	No_BS	3.21333	4.37916	3.7097	3.79	3.94405	4.15065	3.87739	5.25935	3.23852	5.148	5.48757	4.18337	4.16074	6.00499	3.73116	5.3876	5.50735	4.84146	3.7674	3.96157	4.12509	4.93965	4.6323	5.24547
240832	Tor1aip2	No_BS	No_BS	No_BS	18.4356	20.5076	26.0738	19.663	19.9932	25.7019	18.0671	20.115	26.3674	19.4749	21.0308	25.2563	18.2751	23.4937	23.4288	20.2775	21.7696	27.6947	21.6723	21.7861	21.5165	21.9207	21.7325	23.2473
329274	Fam163a	No_BS	No_BS	No_BS	0	0.0303933	0	0.0240594	0.0323623	0.026011	0.0192276	0.0467175	0.0121503	0.0519604	0.0456848	0.0441789	0.0584834	0.159278	0	0.0107052	0.0700851	0.0120303	0.0101311	0.0274776	0.0260318	0.0472747	0.0725871	0.0309402
214575	Tdrd5	No_BS	No_BS	No_BS	2.45702	1.98741	1.72823	2.18455	2.45475	1.41414	1.79972	2.62891	2.12473	2.30654	2.7526	1.95616	2.22897	2.42312	2.15865	1.62003	3.75139	1.71267	2.05755	2.01781	2.18445	2.33844	2.27025	2.36136
170484	Nphs2	No_BS	No_BS	No_BS	0.0222249	0	0.0290322	0.0200856	0.0405258	0.0162862	0	0	0.0152152	0.026027	0.0429067	0.0276616	0.0104623	0	0.0297711	0.0268113	0.0767937	0	0.0170857	0.0256325	0.00507173	0.0321984	0.0134111	0.034535
20652	Soat1	No_BS	No_BS	No_BS	9.08729	8.51231	3.38488	11.024	9.14276	3.87168	10.3141	16.0659	5.28725	16.6348	21.5707	7.80667	10.8457	22.5514	5.49177	11.9291	20.3153	6.14506	6.99483	8.01282	10.5557	15.3374	12.963	12.7965
11352	Abl2	No_BS	No_BS	No_BS	10.2929	7.73957	7.22176	11.3735	8.55448	7.37954	9.38739	9.23887	6.63826	12.3746	9.30599	7.75146	9.50556	5.64133	7.42285	10.177	8.45886	6.29739	8.41808	9.1025	8.42151	9.8107	7.52325	8.31109
30935	Tor3a	No_BS	No_BS	No_BS	8.41244	9.25427	8.37987	8.04203	8.87743	8.13163	7.24751	8.77965	7.90076	7.38869	8.33803	9.03655	7.98989	9.82328	8.69226	7.17785	9.25444	7.26398	8.68219	8.35036	7.97597	8.25442	8.83514	7.89876
215015	Fam20b	No_BS	No_BS	No_BS	8.58955	9.19232	6.14251	8.41823	9.40149	6.18684	8.42276	9.39584	5.51219	7.85442	8.61127	6.16695	7.48085	11.7855	5.02161	8.6908	9.55794	5.06003	7.97479	8.00219	7.77693	7.54421	8.096	7.76959
78255	Ralgps2	chr1-155 (-162014)	Merged-chr1-156939857-1 (-231)	No_BS	5.60211	5.90375	3.55463	5.57484	6.33332	3.392	5.93277	5.9699	4.14349	5.8914	5.8018	4.48965	5.80771	6.43114	3.66457	6.78154	6.86422	4.19447	5.02017	5.10005	5.34872	5.39428	5.30114	5.94674
72713	Angptl1	No_BS	No_BS	No_BS	0	0.0179964	0.0205915	0.014246	0.0383247	0.0462049	0	0.0165974	0	0	0	0.0392388	0.0148411	0.0202096	0.0422312	0.0190163	0.015562	0.0213701	0.0128627	0.0329252	0.00553246	0.0130796	0.0257606	0.0186495
73435	Tex35	chr1-155 (+7005)	No_BS	Merged-chr1-157179449-1 (-70804)	0.0676542	0.0772384	0.132564	0.091713	0	0.0495763	0.0366472	0.0712339	0.185265	0	0	0.0842039	0.0955439	0.0433686	0	0.285654	0	0.183435	0.0924856	0.0470965	0.0977152	0.028068	0.0463042	0.156363
226525	Rasal2	No_BS	No_BS	No_BS	2.80535	1.90753	1.87721	2.95476	2.00186	1.79877	2.37999	2.12846	1.65224	2.95917	2.19027	1.97686	2.39199	1.56472	1.67631	2.93221	1.86672	1.54271	2.1967	2.2518	2.05356	2.37543	1.87767	2.11388
69953	2810025M15Rik	No_BS	No_BS	Merged-chr1-157179449-1 (-232903)	41.9425	49.6015	42.5466	37.7222	47.5053	38.705	49.1057	45.2277	41.6252	40.1411	44.8609	41.582	49.5649	50.6208	38.1661	43.2001	50.4307	47.2924	44.6969	41.3108	45.3195	42.1947	46.1173	46.9744
226527	BC026585	No_BS	No_BS	No_BS	3.10811	3.30369	4.5501	3.17215	3.35487	4.75152	3.42528	4.51387	5.06273	3.04364	3.37954	4.60208	3.53169	4.1909	3.80451	3.62021	4.86714	4.5042	3.65397	3.75951	4.33396	3.67509	3.84237	4.33051
89867	Sec16b	No_BS	No_BS	No_BS	0.0222822	0.0339184	0.0582142	0.0201374	0.00902898	0.0326564	0.00804663	0.0156408	0.0203393	0.0347922	0	0.00924432	0.0209786	0.0285673	0.029848	0.0985617	0.0219977	0.0100692	0.0381383	0.0206076	0.0146756	0.0146788	0.0264646	0.0435429
240843	Brinp2	No_BS	No_BS	No_BS	0.24423	0.20191	0.099011	0.159832	0.204754	0.148112	0.200724	0.150744	0.184497	0.226837	0.216783	0.251565	0.261657	0.151161	0.203062	0.213353	0.207854	0.102755	0.181717	0.1709	0.178655	0.231728	0.205293	0.174654
11899	Astn1	chr1-184 (+94185), chr1-251 (+407330)	No_BS	No_BS	0.0669331	0.0600404	0.0562077	0.0993769	0.0581184	0.0350342	0.0517952	0.0704746	0.0654607	0.0951801	0.0922993	0.065455	0.0900243	0.0551652	0.051234	0.0865131	0.0613584	0.0259257	0.0610604	0.0641765	0.0625768	0.0843115	0.0654745	0.0579324
735253	Mir488	No_BS	No_BS	No_BS	0	0	0	0	0	0	0	0	0	0	0	0	0	0	0	0	0	0	0	0	0	0	0	0
23850	Pappa2	chr1-251 (+188733), chr1-184 (+501878)	No_BS	No_BS	0	0	0	0.00363576	0.00978095	0.00589603	0.0130752	0.00847173	0	0.00471124	0	0	0.00757525	0.00515775	0.00538897	0.0048532	0	0	0	0.00643758	0.00718231	0.00157041	0.00604066	0.00161773
26374	Rfwd2	No_BS	No_BS	Merged-chr1-159392296-2 (+159970), Merged-chr1-159392871-2 (+160545)	16.9887	15.7768	14.0541	16.2424	15.0135	16.6989	16.5401	13.6944	16.6203	13.9193	14.8054	15.3801	16.8951	15.5275	17.1661	15.0062	13.4808	15.845	15.6065	15.9849	15.6182	14.7016	16.5296	14.7773
100217414	Scarna3a	No_BS	No_BS	No_BS	0	0	0	0.264517	0	0.857923	0	0	0	0	0	0	0	0	0	0	0	0	0	0.374147	0	0	0	0
100628622	Mir1843b	No_BS	No_BS	No_BS	0	0	0	0	0	0	0	0	0	0	0	0	0	0	0	0	0	0	0	0	0	0	0	0
21960	Tnr	No_BS	No_BS	No_BS	0	0.0146173	0	0	0.00778216	0	0.00693547	0.00674048	0.0087653	0	0	0	0	0.00820747	0	0	0	0	0.00487244	0.00259405	0.00748041	0	0.00273582	0
67647	4930523C07Rik	No_BS	No_BS	No_BS	0.0192231	0.0219463	0.0167406	0.0231636	0.0311575	0	0.0347095	0.0269869	0.0175469	0.0825428	0.08247	0.0558261	0.0663608	0.0246452	0.0343335	0.10049	0.0632587	0.0347472	0.0193033	0.018107	0.0264144	0.073613	0.0417798	0.0661653
75255	4930562F07Rik	No_BS	No_BS	Merged-chr1-160081803-2 (-3885)	0	0	0	0	0	0	0	0	0	0	0	0	0	0	0	0.0469726	0	0	0	0	0	0	0	0.0156575
329278	Tnn	No_BS	No_BS	No_BS	0.00594551	0.0135756	0.00776657	0	0.00722753	0	0	0	0	0	0.0153043	0	0.0111953	0.00762253	0.0238927	0.0143449	0.0117392	0	0.00909588	0.00240918	0	0.00510143	0.0142369	0.00869468
64659	Mrps14	No_BS	No_BS	No_BS	33.6434	40.3309	49.1009	30.6743	36.9125	61.2805	31.7188	27.3383	54.4421	23.9801	29.3108	38.7529	29.9583	34.7491	50.5855	23.7087	27.0521	49.5313	41.025	42.9558	37.8331	30.6813	38.431	33.4307
12301	Cacybp	No_BS	Merged-chr1-160363610-1 (-150718)	No_BS	289.511	223.55	397.768	221.295	162.778	432.462	250.772	164.149	422.961	176.49	165.258	301.086	237.688	209.296	395.314	161.281	144.672	349.603	303.609	272.178	279.294	214.278	280.766	218.519
29809	Rabgap1l	No_BS	Merged-chr1-160363610-1 (+429328)	No_BS	1.33942	0.918334	1.63557	1.55588	1.30525	1.93636	1.38406	1.11904	2.422	2.32301	1.77075	2.16992	1.30218	1.20393	2.15013	3.72343	2.49731	4.55438	1.29778	1.59916	1.6417	2.08789	1.55208	3.59171
100316784	Mir1927	No_BS	No_BS	No_BS	0	0	0	0	0	0	0	0.333623	0	0	0	0.394368	0	0	0	0.382245	0	0	0	0	0.111208	0.131456	0	0.127415
620246	Gpr52	No_BS	No_BS	No_BS	0	0	0	0	0	0.0466091	0	0	0.043544	0	0	0.039582	0	0	0	0	0.0627927	0	0	0.0155364	0.0145147	0.013194	0	0.0209309
381305	Rc3h1	No_BS	No_BS	No_BS	4.4007	3.62395	4.56446	5.05145	3.5537	4.46368	4.0098	3.97633	4.6855	5.2968	4.03296	4.13816	4.06054	2.89136	4.45375	5.51317	4.01626	5.6045	4.19637	4.35628	4.22387	4.48931	3.80188	5.04464
11905	Serpinc1	No_BS	Merged-chr1-161002294-2 (+23688)	No_BS	0.0479465	0.0364925	0.146142	0.11555	0.0582852	0.0936926	0.0173146	0.0336556	0.0875313	0.056149	0.0617094	0.0198918	0.0601884	0.0819607	0	0.0192803	0.0473342	0.0650002	0.0768603	0.089176	0.0461672	0.0459167	0.047383	0.0438716
240869	Zbtb37	No_BS	Merged-chr1-161002294-2 (+32541)	No_BS	1.21855	1.0053	1.19674	1.1736	1.11368	0.99071	1.07924	1.03953	0.584564	1.19786	1.03029	0.66422	0.937903	0.87806	0.583815	1.19103	0.869314	0.639083	1.1402	1.09266	0.901112	0.964123	0.799926	0.89981
14455	Gas5	No_BS	No_BS	No_BS	47.9522	36.1881	102.138	44.7908	34.4558	113.265	31.7472	26.0705	110.612	32.5911	25.3237	90.0284	32.0712	18.4468	85.3553	30.0005	24.8314	102.975	62.0928	64.1705	56.1433	49.3144	45.2911	52.6023
100217446	Snord47	No_BS	No_BS	No_BS	67.4809	36.3971	141.595	63.3864	32.9419	191.568	42.022	23.4973	178.97	44.8017	32.1417	148.798	50.5261	18.3929	142.352	44.2287	26.7526	169.279	81.8243	95.9653	81.4964	75.2471	70.4236	80.0867
226539	Dars2	No_BS	No_BS	No_BS	24.4299	23.6405	24.2525	22.5577	23.3196	27.0403	27.4279	24.8999	32.908	21.7082	23.5353	27.0689	28.3307	29.0703	33.2545	21.2338	25.1557	28.2552	24.1076	24.3059	28.4119	24.1041	30.2185	24.8816
70454	Cenpl	chr1-44 (+26396)	Merged-chr1-161097165-1 (+26398)	No_BS	6.92449	7.22644	13.8178	7.38413	7.07492	16.7895	7.17961	6.54538	17.1007	7.04778	7.7275	13.4827	7.06597	7.62497	15.2697	6.74767	6.24891	17.2774	9.32292	10.4162	10.2752	9.41933	9.98688	10.0913
226541	Klhl20	chr1-44 (+34348)	Merged-chr1-161097165-1 (+34346)	No_BS	5.82612	6.33891	5.40901	5.55138	5.97999	5.01535	5.6445	5.74704	4.28727	5.28994	5.59358	4.46152	5.46108	5.8242	4.44651	4.99522	5.2534	4.10575	5.85801	5.51558	5.22627	5.11501	5.24393	4.78479
73844	Ankrd45	No_BS	No_BS	No_BS	2.32847	3.26202	5.12599	2.10434	2.16521	3.2902	2.05024	1.47491	3.03573	1.6513	0.979052	1.96284	2.23591	1.07041	2.62202	1.75701	0.769299	1.97449	3.57216	2.51992	2.18696	1.53106	1.97611	1.50027
100502590	4930469G21Rik	No_BS	No_BS	No_BS	0.144811	0.0826629	0	0.0654361	0.0440092	0	0	0.0762367	0	0.0423962	0	0.0450588	0	0	0	0	0.0357405	0	0.0758247	0.0364817	0.0254122	0.0291517	0	0.0119135
11758	Prdx6	No_BS	Merged-chr1-161251094-1 (+125)	No_BS	93.5523	102.069	99.2045	82.6411	90.3962	77.7463	107.23	93.0672	88.2319	86.9044	90.8493	98.1306	109.844	96.991	92.8075	89.0543	86.6315	101.3	98.2751	83.5945	96.1762	91.9614	99.8807	92.3286
22164	Tnfsf4	No_BS	No_BS	No_BS	0	0	0.0280398	0	0	0.0314589	0	0.0226009	0	0.0251373	0	0	0.0202093	0	0.0287535	0.0258948	0	0.0291	0.0093466	0.0104863	0.00753364	0.00837911	0.0163209	0.0183316
240873	Tnfsf18	No_BS	No_BS	No_BS	0.0501998	0.0191038	0	0.0151226	0	0.024524	0.0181283	0.0176186	0	0	0.0215365	0.0208266	0.0157543	0	0.0224149	0.0201864	0	0.04537	0.0231012	0.0132155	0.0119157	0.014121	0.012723	0.0218521
14103	Fasl	No_BS	No_BS	No_BS	0	0	0.0466557	0	0.0217088	0.0261724	0	0	0.0489026	0	0.0229842	0	0	0	0.0717647	0	0	0.0242098	0.0155519	0.0159604	0.0163009	0.00766138	0.0239216	0.00806995
226551	Suco	No_BS	No_BS	No_BS	10.1346	9.43249	14.2257	10.307	8.53938	15.6153	10.1728	9.18923	16.6275	10.7591	9.03402	13.4587	9.96432	8.44451	14.7711	11.79	8.6268	16.3966	11.2643	11.4872	11.9965	11.0839	11.06	12.2711
75368	4930558K02Rik	No_BS	No_BS	No_BS	0	0.0338747	0	0	0	0.130457	0	0.0624826	0.0406261	0.0347474	0.0381884	0	0.0279354	0.0380406	0.039746	0.0357944	0.11717	0.0402249	0.0112916	0.0434858	0.0343696	0.0243119	0.0352407	0.0643964
67292	Pigc	No_BS	No_BS	No_BS	1.26599	1.60062	1.9681	1.2576	1.71704	1.56407	1.29219	1.47619	1.848	1.27427	1.68325	1.44546	1.30028	2.13281	1.56971	1.76706	1.86957	2.22691	1.61157	1.5129	1.53879	1.46766	1.6676	1.95451
103967	Dnm3	No_BS	No_BS	No_BS	0.00918184	0.0104826	0.00599708	0.020745	0.00558085	0.00672836	0	0.0241691	0.0377154	0.0161289	0.0177262	0	0.00432231	0.0117717	0.0245989	0.0276915	0.0135969	0.0186715	0.00855383	0.0110181	0.0206282	0.011285	0.0135643	0.0199866
72753	2810442N19Rik	No_BS	No_BS	No_BS	0	0	0	0	0	0	0	0	0	0	0	0	0	0	0	0	0	0	0	0	0	0	0	0
474332	Dnm3os	No_BS	No_BS	No_BS	0	0	0	0	0	0	0	0.0183476	0	0.03061	0.00560688	0	0.016406	0.0111704	0	0.0578092	0.00860152	0	0	0	0.00611586	0.0120723	0.00919213	0.0221369
723821	Mir199a-2	No_BS	No_BS	No_BS	0	0	0	0	0	0	0	0	0	0	0	0	0	0	0	0	0	0	0	0	0	0	0	0
387210	Mir214	No_BS	No_BS	No_BS	0	0	0	0	0	0	0	0	0	0	0	0	0	0	0	0	0	0	0	0	0	0	0	0
71449	Mettl13	No_BS	No_BS	No_BS	12.9485	14.4577	12.8718	12.7761	12.5202	9.81507	12.2175	14.1549	9.59335	10.4522	12.2679	10.631	12.8785	12.9822	12.2874	10.2444	11.3533	9.66644	13.426	11.7038	11.9886	11.117	12.7161	10.4214
53330	Vamp4	No_BS	Merged-chr1-162570746-1 (+231)	No_BS	2.18246	2.41378	2.70839	2.18195	2.08929	1.91914	2.34964	1.82399	2.39059	2.74751	1.93114	2.25796	2.49141	2.09854	2.9235	2.81385	2.41045	2.81079	2.43488	2.06346	2.18807	2.3122	2.50448	2.67836
17926	Myoc	No_BS	No_BS	No_BS	0	0	0	0	0	0.0243353	0	0	0	0	0.0213708	0	0	0	0	0	0	0	0	0.00811177	0	0.00712361	0	0
100038657	7420461P10Rik	No_BS	No_BS	No_BS	0	0	0	0	0	0	0	0	0	0.0545829	0	0	0	0	0	0	0	0	0	0	0	0.0181943	0	0
226562	Prrc2c	No_BS	No_BS	No_BS	44.8419	28.693	25.448	50.5732	31.3479	21.8677	39.6201	39.5996	23.6716	55.073	35.058	25.613	41.9847	19.5619	22.7999	49.1447	31.7817	18.076	32.9943	34.5962	34.2971	38.5813	28.1155	33.0008
226564	Fmo4	No_BS	No_BS	No_BS	0.0193271	0	0.126234	0.0349334	0.0234945	0.0283254	0	0	0.0529253	0	0.0248748	0	0	0	0.0258894	0.0233154	0.0190803	0.0786041	0.0485204	0.0289178	0.0176418	0.00829161	0.00862979	0.0403333
14261	Fmo1	No_BS	No_BS	No_BS	0.0296969	0.0678077	0.0387928	0	0.0722008	0.0217616	0.0160863	0.0625364	0.0609916	0.0173886	0.0382213	0	0	0.0380733	0	0	0.0586353	0.0201298	0.0454325	0.0313208	0.0465381	0.0185366	0.0126911	0.026255
55990	Fmo2	No_BS	No_BS	No_BS	0	0.0827372	0	0	0.151024	0	0	0.0763052	0	0	0.0399742	0	0	0.0398195	0	0	0.0919867	0	0.0275791	0.0503414	0.0254351	0.0133247	0.0132732	0.0306622
226565	Fmo6	No_BS	No_BS	No_BS	0	0	0	0	0	0	0	0	0	0	0	0	0	0	0	0	0	0	0	0	0	0	0	0
14262	Fmo3	No_BS	No_BS	No_BS	0	0	0	0	0	0	0	0	0	0	0	0	0	0	0	0	0	0	0	0	0	0	0	0
78258	Mroh9	No_BS	No_BS	No_BS	0	0	0	0	0	0	0	0	0	0	0	0	0	0	0	0	0	0	0	0	0	0	0	0
18933	Prrx1	No_BS	No_BS	No_BS	0.0278229	0.0529406	0.0424023	0.0209539	0.0507334	0.0203883	0.165784	0.0537075	0.0190476	0.135761	0.0596823	0.0404005	0.205194	0.0594513	0.0248466	0.212575	0.100714	0.0188595	0.0410553	0.0306919	0.0795129	0.0786146	0.0964974	0.110716
98376	Gorab	No_BS	No_BS	Merged-chr1-163537508-2 (-133867)	6.66247	8.15635	9.71011	6.64318	7.22894	10.1073	6.65122	5.60909	10.6489	5.85169	5.7048	8.90903	6.53187	7.95933	8.74025	6.04462	5.93867	10.5811	8.17631	7.99316	7.63641	6.82184	7.74382	7.52147
240879	Mettl11b	No_BS	No_BS	Merged-chr1-163537508-2 (+187724)	0	0	0	0	0	0	0	0	0	0	0	0	0	0	0	0	0	0	0	0	0	0	0	0
16579	Kifap3	No_BS	No_BS	No_BS	18.0267	20.2854	22.2092	18.3697	19.359	23.024	19.6508	17.5386	23.7387	19.9607	18.9777	21.4394	20.102	20.4171	20.767	23.9702	19.6501	25.0222	20.1738	20.2509	20.3094	20.126	20.4287	22.8808
240880	Scyl3	No_BS	No_BS	No_BS	6.24606	5.8359	6.14825	6.13077	5.75734	5.90483	5.80922	6.04143	6.30315	5.99487	6.02923	6.30719	6.03318	6.38362	5.88047	6.10443	6.20992	5.11256	6.07674	5.93098	6.05127	6.11043	6.09909	5.80897
381306	BC055324	No_BS	No_BS	No_BS	22.0162	22.9942	32.1394	23.8763	25.5515	28.7354	22.8101	23.7309	30.6321	22.7804	24.074	27.6972	23.4434	25.3807	25.4533	22.4646	22.3677	24.4568	25.7166	26.0544	25.7244	24.8505	24.7591	23.0964
69962	Mettl18	chr1-252 (+23281)	No_BS	No_BS	10.0438	11.7642	14.6055	7.77114	9.44513	16.1781	9.8803	8.72957	16.9954	6.99066	8.17076	12.2059	9.70151	10.5991	16.1195	7.02985	8.88658	13.5199	12.1378	11.1315	11.8684	9.12245	12.14	9.81211
20339	Sele	chr1-252 (-30064)	No_BS	No_BS	0	0.0406218	0	0.0214375	0.0144178	0	0.0256984	0	0.0162393	0	0.0152649	0	0	0	0	0.0429238	0.0117089	0	0.0135406	0.0119518	0.0139792	0.0050883	0	0.0182109
20343	Sell	No_BS	No_BS	No_BS	0	0	0	0	0	0	0	0	0	0	0	0	0	0.0190777	0	0	0	0	0	0	0	0	0.00635923	0
20344	Selp	No_BS	No_BS	No_BS	0.0301374	0.114689	0.0262455	0.00907882	0.0976957	0	0.282966	0.031732	0	0.29411	0.103435	0	0.255367	0.0128794	0.053827	0.32721	0.109093	0	0.0570241	0.0355915	0.104899	0.132515	0.107358	0.145434
100503816	Gm16548	No_BS	No_BS	No_BS	0	0	0	0	0	0	0	0	0	0	0	0	0	0.0356803	0	0	0	0	0	0	0	0	0.0118934	0
14067	F5	No_BS	No_BS	No_BS	0.255558	0.116704	0.103185	0.0965827	0.0960232	0.040859	0.0956437	0.254403	0.146326	0.0870625	0.107645	0.121446	0.279978	0.142971	0.273864	0.15695	0.188074	0.113385	0.158482	0.0778216	0.165457	0.105384	0.232271	0.152803
116914	Slc19a2	No_BS	No_BS	No_BS	14.5268	18.6606	28.3381	13.0236	16.1425	22.4525	14.0929	20.1733	27.7959	12.3343	17.1905	22.7991	15.1611	20.7943	29.2148	11.7142	18.1033	25.9874	20.5085	17.2062	20.6874	17.4413	21.7234	18.6016
74895	Ccdc181	No_BS	No_BS	No_BS	4.71794	4.1801	4.23558	5.10339	3.91946	3.4706	5.40729	3.7976	3.66638	4.79976	3.77461	3.46881	5.52236	3.66659	4.19697	3.84563	3.47078	3.5067	4.37787	4.16449	4.29042	4.0144	4.46198	3.60771
66352	Blzf1	No_BS	No_BS	No_BS	6.75343	8.09125	11.1588	6.35863	7.87669	10.9765	6.98262	7.2189	10.0789	6.56558	6.74206	9.02335	6.58394	8.86683	8.67958	6.77374	6.70098	9.64286	8.66783	8.40395	8.09347	7.44366	8.04345	7.70586
171567	Nme7	No_BS	No_BS	No_BS	10.3143	11.8931	16.7035	9.37321	9.72732	17.4317	13.2825	11.0891	19.9531	9.92045	9.32638	13.4928	12.6101	13.752	17.2667	9.76365	9.62882	16.6988	12.9703	12.1774	14.7749	10.9132	14.5429	12.0304
11931	Atp1b1	No_BS	No_BS	No_BS	30.2303	36.5376	38.3748	30.4779	36.2787	49.4839	29.7601	39.3696	38.251	42.2574	51.1963	62.8692	29.6166	53.9216	36.3148	45.4451	67.3108	58.916	35.0476	38.7468	35.7935	52.1077	39.951	57.224
56429	Dpt	No_BS	No_BS	No_BS	0	0.0241016	0	0	0.025663	0	0	0.0222279	0	0	0.0543415	0	0	0.0270656	0	0	0.104207	0	0.00803386	0.00855435	0.00740931	0.0181138	0.00902186	0.0347355
433374	Gm20743	No_BS	No_BS	No_BS	0	0	0	0	0	0	0	0	0	0	0	0	0	0	0	0	0	0	0	0	0	0	0	0
16963	Xcl1	No_BS	No_BS	No_BS	0	0	0	0	0	0	0	0	0	0	0	0	0	0	0	0	0	0	0	0	0	0	0	0
75857	4930568G15Rik	No_BS	No_BS	No_BS	0	0	0	0	0	0	0	0	0	0.040527	0	0	0	0	0	0	0	0	0	0	0	0.013509	0	0
83993	Tbx19	No_BS	No_BS	No_BS	0.0259485	0	0	0	0	0	0	0	0	0	0	0	0	0	0.0173795	0.0313033	0	0	0.00864951	0	0	0	0.00579318	0.0104344
108735	Sft2d2	No_BS	Merged-chr1-165194425-2 (+8)	No_BS	8.14375	6.43613	3.85356	7.87385	6.33646	4.38758	7.19086	7.60728	5.55382	7.94866	7.80272	6.75985	8.13214	7.90072	6.68932	8.60286	8.50868	6.73604	6.14448	6.1993	6.78399	7.50374	7.57406	7.94919
226591	Tiprl	No_BS	No_BS	No_BS	9.24143	12.7845	12.4723	9.40296	11.7787	12.2426	10.7611	11.468	11.7388	10.3715	12.1976	11.3358	11.2976	15.1023	10.6634	10.4565	12.0947	13.3488	11.4994	11.1414	11.3226	11.3016	12.3545	11.9666
240888	Gpr161	No_BS	No_BS	No_BS	0.782115	0.365282	0.464396	0.947796	0.324123	0.286563	0.731775	0.823497	0.36507	1.06163	0.663453	0.508842	0.769826	0.455783	0.523837	0.793409	0.754578	0.409661	0.537264	0.519494	0.640114	0.744641	0.583149	0.65255
74106	Dcaf6	No_BS	No_BS	No_BS	4.23228	4.76026	4.61398	4.76931	4.58593	4.01264	4.69833	4.08211	3.992	4.54023	4.66706	3.92793	4.41756	4.5686	3.96151	6.54281	5.56066	4.60427	4.53551	4.45596	4.25748	4.3784	4.31589	5.56924
70456	Mpc2	No_BS	No_BS	No_BS	9.50387	13.7128	12.8375	7.49258	11.5532	12.9211	10.9534	10.8158	11.6284	10.7035	11.0348	10.0167	10.8135	13.8956	11.4306	10.3918	10.5004	14.7483	12.0181	10.6556	11.1325	10.585	12.0466	11.8802
271639	Adcy10	No_BS	No_BS	No_BS	0.0397821	0.0151393	0.0346447	0.0299606	0.0161201	0.0194346	0.0430987	0.0139623	0.0363131	0.0543524	0.0512014	0.0165045	0.0312121	0.0170011	0.0444081	0.0239958	0.019637	0.00898864	0.0298553	0.0218384	0.0311247	0.0406861	0.0308738	0.0175405
68481	Mpzl1	No_BS	No_BS	No_BS	24.877	26.9451	24.3964	30.1134	29.4392	26.6193	20.7095	22.4116	22.0186	28.4289	29.5084	30.8712	22.2621	24.9212	22.7198	22.9545	25.6302	23.2321	25.4061	28.724	21.7132	29.6028	23.301	23.9389
226594	Rcsd1	No_BS	No_BS	No_BS	0.491545	0.605482	0.794177	0.397469	0.456014	1.00477	0.29429	0.476693	0.336512	0.18178	0.549399	0.209296	0.280107	0.464352	0.20793	0.202862	0.421416	0.315653	0.630401	0.619416	0.369165	0.313491	0.317463	0.31331
433375	Creg1	No_BS	No_BS	No_BS	3.93321	3.58119	4.79822	2.87894	3.22048	4.76399	4.27873	3.64505	5.47437	3.23568	3.80713	3.5198	4.00913	5.31352	4.98566	3.47042	3.62625	4.47286	4.10421	3.62114	4.46605	3.52087	4.76943	3.85651
12503	Cd247	chr1-31 (+123027)	Merged-chr1-165911745-2 (+123022)	No_BS	0.0150033	0.00856433	0.0391972	0.0338977	0.0364767	0.0439769	0.0243811	0.0157971	0.0308137	0.0263549	0.0965494	0.0186734	0	0.0192351	0.0200974	0.00904967	0.0222175	0.0203396	0.0209216	0.0381171	0.023664	0.0471926	0.0131109	0.0172023
18986	Pou2f1	chr1-31 (+90928)	Merged-chr1-166003351-1 (-673), Merged-chr1-165911745-2 (+90933)	No_BS	6.30586	4.86455	4.52432	7.13311	5.02934	4.02687	6.56926	6.19059	4.22331	9.61605	6.00566	4.93965	6.57868	2.99289	3.87798	6.96899	5.05353	3.18259	5.23158	5.39644	5.66105	6.85379	4.48319	5.06837
240892	Dusp27	No_BS	No_BS	No_BS	13.8922	10.7466	14.1457	15.6492	11.1612	12.1356	18.2576	10.7514	10.7501	21.5142	11.9936	14.6313	17.0541	6.30361	7.70114	34.0357	15.6378	16.8675	12.9282	12.982	13.253	16.0464	10.353	22.1803
59290	Gpa33	chr1-88 (+25037)	Merged-chr1-166154326-1 (+24088), Merged-chr1-166155216-1 (+24978)	No_BS	26.1177	25.9142	25.8143	25.4822	29.1128	30.6618	35.116	22.4882	26.3563	36.8653	22.7976	42.2362	32.1055	18.8665	23.7072	23.0582	14.6616	18.888	25.9488	28.419	27.9868	33.9663	24.8931	18.8693
98558	Mael	chr1-88 (+83469)	Merged-chr1-166155216-1 (+83528), Merged-chr1-166154326-1 (+84418)	No_BS	9.78488	13.0074	11.3811	8.07581	10.727	11.0992	18.7568	18.3706	16.3645	14.6767	16.7052	16.0433	16.9525	20.9367	11.192	10.4027	14.7104	8.75259	11.3911	9.96733	17.8306	15.8084	16.3604	11.2886
100039795	Ildr2	No_BS	No_BS	No_BS	0.246696	0.100246	0.0983158	0.332536	0.152487	0.0796642	0.303502	0.308177	0.200376	0.494557	0.360562	0.244594	0.263756	0.219788	0.22404	0.226987	0.160988	0.0793591	0.148419	0.188229	0.270685	0.366571	0.235862	0.155778
27878	Tada1	No_BS	No_BS	No_BS	5.47703	5.70119	7.23877	4.07632	4.24939	4.5093	6.31758	6.24174	6.28606	4.73504	5.36982	4.35074	6.02106	7.68279	5.99883	6.82104	5.16853	6.39869	6.139	4.27834	6.28179	4.81854	6.56756	6.12942
71592	Pogk	No_BS	No_BS	No_BS	0.623268	0.444058	0.208134	0.707269	0.393073	0.240381	0.979844	0.868415	0.333652	1.3171	0.904709	0.460774	1.08095	0.684917	0.464526	1.32287	0.795737	0.324005	0.425153	0.446908	0.727304	0.894194	0.743465	0.814203
226601	Gm4846	No_BS	No_BS	No_BS	0	0	0	0	0	0	0	0	0	0	0	0	0	0	0	0	0	0	0	0	0	0	0	0
226604	Gm4847	No_BS	No_BS	No_BS	0.0229333	0.013091	0	0	0.0139392	0	0	0	0.0314003	0	0.0147581	0.0428148	0	0	0	0	0.0113202	0	0.0120081	0.00464639	0.0104668	0.019191	0	0.0037734
240894	Fmo9	No_BS	No_BS	No_BS	0	0	0	0	0	0	0	0	0	0	0	0	0	0	0	0	0	0	0	0	0	0	0	0
100503962	Gm16701	No_BS	No_BS	No_BS	0.073798	0.0842526	0	0	0	0	0.0399753	0	0	0	0.0474908	0.0459253	0	0.0473069	0.0494277	0	0.0728556	0	0.0526835	0	0.0133251	0.0311387	0.0322449	0.0242852
226610	Fam78b	chr1-254 (+1256)	Merged-chr1-167002659-1 (+1242)	No_BS	0.0969765	0.134439	0.099534	0.0688614	0.0842052	0.0609115	0.0975569	0.072934	0.0758745	0.0324476	0.0802371	0.0775922	0.084781	0.0355229	0.0556731	0.0668507	0.0410306	0.112688	0.110317	0.071326	0.0821218	0.0634256	0.058659	0.0735231
80914	Uck2	chr1-157 (-5029)	Merged-chr1-167290079-2 (-4952), Merged-chr1-167289700-1 (-4573)	No_BS	119.189	110.859	116.013	124.572	123.787	148.445	126.943	119.702	135.323	135.042	133.321	179.757	119.536	122.935	130.903	97.6955	115.321	119.839	115.354	132.268	127.323	149.373	124.458	110.952
102465177	Mir6347	No_BS	No_BS	No_BS	0	0	0	0	0	0.501163	0	0	0	0	0	0	0	0	0	0	0	0	0	0.167054	0	0	0	0
68944	Tmco1	chr1-157 (-18514)	No_BS	No_BS	14.0574	17.8731	22.7093	11.8671	13.7666	22.435	14.4432	14.8256	21.4248	11.7704	14.009	15.6514	14.6667	20.9817	19.3475	12.0692	14.2056	22.8772	18.2133	16.0229	16.8978	13.8103	18.332	16.384
56752	Aldh9a1	No_BS	No_BS	No_BS	37.6828	44.1345	27.5506	36.4243	44.6079	26.6577	48.5904	48.7261	33.2006	40.0462	47.2756	32.3192	50.5714	59.0182	40.5976	38.3851	45.7347	28.8897	36.456	35.8966	43.5057	39.8804	50.0624	37.6698
66447	Mgst3	No_BS	No_BS	No_BS	16.4257	26.7629	32.1141	17.5973	33.9184	39.1388	24.0411	30.9245	42.9695	23.2485	32.271	33.5765	22.6849	44.7674	36.0643	19.356	32.4856	43.43	25.1009	30.2182	32.645	29.6987	34.5056	31.7572
240899	Lrrc52	No_BS	No_BS	No_BS	0	0	0	0	0	0	0	0.0319832	0	0	0	0	0	0	0	0	0	0	0	0	0.0106611	0	0	0
20183	Rxrg	No_BS	No_BS	Merged-chr1-167598494-2 (+110)	1.08158	0.483908	0.763708	0.713289	0.568562	0.642625	1.04507	0.846411	0.820499	0.701771	0.545531	0.654888	1.07334	0.824498	0.685252	1.60452	0.981192	0.792583	0.776399	0.641492	0.903995	0.634063	0.861031	1.1261
110648	Lmx1a	No_BS	No_BS	Merged-chr1-168306833-2 (+617275)	0.455257	0.401626	1.01369	0.336629	0.264134	0.576232	0.336281	0.272355	0.637506	0.23022	0.0932173	0.399212	0.340949	0.291835	0.720715	0.187229	0.173649	0.54705	0.623525	0.392332	0.415381	0.240883	0.451166	0.302642
18514	Pbx1	No_BS	No_BS	Merged-chr1-168306833-2 (+125064)	2.74662	1.11322	1.52656	2.86904	1.32107	1.73997	2.47967	1.5988	2.67528	3.08575	1.80584	2.47355	2.72258	1.16424	2.24342	4.09463	2.08326	2.80023	1.79547	1.9767	2.25125	2.45505	2.04341	2.99271
102465178	Mir6348	No_BS	No_BS	No_BS	0	0	0	0	0	0	0	0	0	0	0	0	0	0	0	0	0	0	0	0	0	0	0	0
66977	Nuf2	No_BS	No_BS	No_BS	21.6416	25.1173	31.947	24.3994	24.5449	32.5593	22.6524	21.5619	30.5952	21.7113	24.342	29.9026	21.3894	25.6838	25.431	23.6475	23.4918	31.2081	26.2353	27.1679	24.9365	25.3186	24.1681	26.1158
19737	Rgs5	No_BS	No_BS	No_BS	0.019092	0.0217967	0.0249398	0.0172543	0.0464176	0	0	0	0.0261408	0	0.0245723	0	0	0.0244772	0.0511491	0.0230319	0.0188482	0	0.0219428	0.021224	0.00871361	0.00819078	0.0252088	0.01396
19736	Rgs4	No_BS	No_BS	No_BS	0	0.0536283	0.0153404	0.0212261	0.042827	0.103266	0.0381675	0.0494592	0.0160792	0	0	0.0146161	0.0552818	0.0602235	0.0157308	0.0141668	0.0927478	0.0159204	0.0229896	0.055773	0.0345686	0.00487205	0.0437454	0.040945
78465	1700084C01Rik	No_BS	No_BS	No_BS	0.215859	0.328585	0.0626611	0.0867028	0.116624	0.070302	0.233855	0.277787	0.0985183	0.11235	0.030869	0.0597029	0.270973	0.338245	0.289152	0.0868015	0.142068	0.0650303	0.202368	0.0912097	0.203387	0.0676406	0.299457	0.0979667
15490	Hsd17b7	No_BS	No_BS	Merged-chr1-169990976-2 (-21735)	2.55218	2.74132	3.3043	3.88286	3.17593	3.23137	2.90402	2.85417	3.11192	3.84652	3.31393	4.29485	2.58769	3.31078	2.17465	2.924	3.6452	3.27569	2.86593	3.43005	2.9567	3.81843	2.69104	3.28163
67303	3110045C21Rik	No_BS	No_BS	No_BS	0.0304295	0	0.238499	0.137502	0.110973	0.222984	0.197798	0	0.458305	0.285082	0.0391642	0.0757464	0.114597	0.15605	0.285331	0.073418	0.210286	0.206264	0.0896428	0.157153	0.218701	0.133331	0.185326	0.163323
18214	Ddr2	No_BS	No_BS	Merged-chr1-169990976-2 (+97968)	0.349958	0.266356	0.7347	0.192022	0.20258	0.372456	0.311431	0.17985	0.205355	0.478131	0.166223	0.191856	0.384396	0.16558	0.256714	0.47746	0.2221	0.16944	0.450338	0.255686	0.232212	0.278737	0.268897	0.289667
107652	Uap1	No_BS	No_BS	No_BS	11.5909	10.3945	12.1129	11.4164	11.4355	12.1291	10.1792	11.3198	11.9909	12.9705	13.0875	14.8305	10.6281	12.8215	11.7311	13.2262	14.2732	14.2561	11.3661	11.6604	11.1633	13.6295	11.7269	13.9185
16589	Uhmk1	No_BS	No_BS	No_BS	5.37515	4.14952	2.18447	6.89338	4.02423	2.0257	5.89722	5.46192	2.12613	7.59361	4.80971	2.25125	5.73542	3.916	2.01149	6.97843	5.39074	1.388	3.90305	4.31444	4.49509	4.88485	3.88764	4.58572
545378	Sh2d1b2	No_BS	No_BS	No_BS	0	0	0	0	0	0	0	0	0	0	0	0	0	0	0	0	0.0854547	0	0	0	0	0	0	0.0284849
26904	Sh2d1b1	No_BS	No_BS	No_BS	0	0.0275158	0	0.0435632	0.0878955	0	0.0783325	0	0.0329999	0.084674	0.0310198	0.0299973	0.181531	0.0308997	0.0322849	0.0581503	0.0475875	0	0.00917195	0.0438195	0.0371108	0.0485637	0.081572	0.0352459
665574	Gm7694	No_BS	No_BS	No_BS	0.207243	0.216028	0.0941634	0.27687	0.230023	0.0264114	0.302615	0.303594	0.111036	0.358769	0.34791	0.0672884	0.424169	0.196386	0.21726	0.48915	0.257969	0.171016	0.172478	0.177768	0.239081	0.257989	0.279272	0.306045
76925	1700015E13Rik	chr1-255 (+194161)	No_BS	No_BS	0	0	0	0.043777	0	0	0	0	0.0663237	0	0	0.060289	0	0	0	0	0.0478211	0	0	0.0145923	0.0221079	0.0200963	0	0.0159404
70729	Nos1ap	chr1-255 (+86897)	No_BS	Merged-chr1-170619143-2 (-29282)	0.09375	0.0856247	0.0489859	0.118616	0.068379	0	0.111722	0.138194	0.0385088	0.241534	0.108594	0.0700099	0.194183	0.0721161	0.0125582	0.226193	0.129574	0.0762571	0.0761202	0.0623317	0.0961419	0.140046	0.0929523	0.144008
320078	Olfml2b	chr1-8 (+11188)	Merged-chr1-170655723-2 (+11191)	Merged-chr1-170619143-2 (-25389), Merged-chr1-170655727-2 (+11195)	0.37941	0.305759	0.24781	0.514334	0.393395	0.310737	0.253878	0.446483	0.275024	0.35284	0.359058	0.333333	0.336199	0.443508	0.164429	1.37312	0.58388	0.695898	0.310993	0.406155	0.325128	0.34841	0.314712	0.884299
226641	Atf6	chr1-8 (+212051)	Merged-chr1-170655723-2 (+212048)	Merged-chr1-170655727-2 (+212044)	6.77051	8.49046	6.40197	6.54959	7.20092	6.1856	6.42248	8.67339	5.01845	6.70938	7.39764	5.40278	6.73167	9.28542	4.76715	5.59958	7.25057	4.20349	7.22098	6.64537	6.70477	6.50327	6.92808	5.68455
80915	Dusp12	No_BS	No_BS	No_BS	26.4938	31.3375	41.537	22.9213	26.8592	46.823	28.403	29.7747	38.6846	24.403	28.9548	37.4486	29.0142	39.4775	35.6915	18.4368	24.6914	34.8949	33.1228	32.2012	32.2874	30.2688	34.7278	26.0077
435653	Fcrlb	No_BS	No_BS	No_BS	0.107593	0	0.0351371	0	0.0653968	0.0394217	0.0291408	0.0283216	0	0	0	0.133913	0.0506492	0.0689709	0.0360314	0	0.0265548	0	0.0475768	0.0349395	0.0191541	0.0446377	0.0518838	0.00885161
98752	Fcrla	No_BS	No_BS	No_BS	0	0	0	0	0	0.0293095	0	0	0	0	0.0257391	0	0	0	0	0	0	0	0	0.00976982	0	0.00857968	0	0
14130	Fcgr2b	No_BS	No_BS	No_BS	1.42975	0.969177	2.04277	0.565307	0.434512	1.30964	0.774475	0.682136	1.77409	0.392425	0.402535	0.973165	0.399624	0.458259	1.34663	0.13475	0.110273	0.514859	1.48057	0.769818	1.0769	0.589375	0.734839	0.253294
246256	Fcgr4	No_BS	No_BS	No_BS	0.05526	0.0315442	0	0	0.134351	0.0809879	0.0299335	0.0872757	0.151324	0.0647135	0.0355611	0	0.0780403	0	0	0.0333318	0.0545543	0	0.0289347	0.0717797	0.0895111	0.0334249	0.0260134	0.0292953
14131	Fcgr3	No_BS	No_BS	No_BS	0	0.378856	0.0666904	0	0.124123	0	0.110619	0.376281	0.0699021	0.0597871	0.229977	0	0.144199	0.850896	0.0341939	0.0307943	0.504012	0	0.148516	0.0413745	0.185601	0.0965882	0.343096	0.178269
102466998	Mir6546	No_BS	No_BS	No_BS	0	0	0	0	0	0	0	0	0	0	0	0	0	0	0	0	0	0	0	0	0	0	0	0
75472	Cfap126	No_BS	Merged-chr1-171126073-2 (+4412)	No_BS	0.901849	1.33468	1.22171	0.965973	1.33994	1.32173	0.687543	0.984736	0.640274	0.58674	1.28969	0.78988	0.911979	0.856466	0.760632	0.725304	1.28603	0.81508	1.15275	1.20921	0.770851	0.88877	0.843026	0.94214
66052	Sdhc	No_BS	Merged-chr1-171126073-2 (+24530)	No_BS	88.4382	138.859	70.4866	100.39	156.045	79.7257	106.316	108.416	55.2705	101.304	120.95	80.3574	97.44	132.5	63.0199	86.0858	113.597	69.0215	99.2611	112.054	90.0008	100.87	97.6533	89.5681
17528	Mpz	No_BS	No_BS	No_BS	0.121306	0.158275	0.226372	0.297565	0.210661	0.253976	0.131419	0.273695	0.237274	0.182646	0.0669112	0.129411	0.277363	0.177739	0.208921	0.146339	0.153973	0.164452	0.168651	0.254067	0.214129	0.126323	0.221341	0.154921
66425	Pcp4l1	No_BS	No_BS	No_BS	0.635928	0.700981	0.572902	0.8918	1.06628	0.642761	0.237567	0.161622	0.300246	0.667679	0.649131	0.545855	0.454203	0.0843415	0.411238	0.502622	0.303079	0.445922	0.636604	0.866947	0.233145	0.620888	0.316594	0.417208
12355	Nr1i3	No_BS	No_BS	No_BS	0.0244254	0	0.0319067	0.0220743	0.0296922	0.0715947	0.0793851	0.0257177	0.0334433	0.0286039	0.0314366	0.121601	0.0229963	0.0626298	0.0981563	0	0	0	0.0187773	0.0411204	0.046182	0.0605473	0.0612608	0
641376	Tomm40l	No_BS	No_BS	No_BS	14.572	15.6235	12.7159	13.0731	17.8579	16.1733	13.9672	13.5123	14.7535	10.2916	11.9044	13.4847	13.4299	16.7715	16.9055	10.5303	13.7086	15.9066	14.3038	15.7014	14.0777	11.8936	15.7023	13.3818
11807	Apoa2	No_BS	No_BS	No_BS	0.184495	0.0842526	0.0964018	0.200083	0.358844	0.324471	0.119926	0.194257	0.353655	0.129634	0.0949815	0.275552	0.10422	0	0.0988554	0.133541	0.0728556	0.200093	0.121716	0.294466	0.222613	0.166723	0.0676919	0.135497
14127	Fcer1g	No_BS	No_BS	No_BS	0.314931	0.179773	0.685654	0.426926	0.446646	0.307705	0.0568645	0.221063	0.28747	0.30734	0.202666	0.261314	0.345923	0.336469	0.492174	0.189961	0.414546	0.426947	0.393453	0.393759	0.188466	0.257106	0.391522	0.343818
226646	Ndufs2	No_BS	No_BS	No_BS	128.085	175.57	136.5	139.72	187.258	155.666	139.836	137.987	126.26	123.907	148.079	146.196	132.355	177.558	138.534	120.791	144.092	145.568	146.718	160.881	134.694	139.394	149.482	136.817
240913	Adamts4	No_BS	No_BS	No_BS	1.27882	0.644109	0.503609	1.52113	0.765853	0.909543	0.774212	0.66334	0.746733	1.43152	0.907664	1.29906	1.02694	0.663044	0.654981	1.25913	0.835469	0.675621	0.808845	1.06551	0.728095	1.21275	0.781655	0.923407
57370	B4galt3	No_BS	No_BS	No_BS	9.76661	12.4527	8.94192	10.9511	13.1754	9.90561	9.98157	15.3249	7.71579	10.6884	15.3733	10.6067	10.9691	18.217	10.0957	10.1347	17.0482	8.92849	10.3871	11.344	11.0074	12.2228	13.0939	12.0371
19044	Ppox	No_BS	No_BS	No_BS	5.40537	4.78532	5.62402	4.91935	5.78702	4.33625	4.31496	6.19062	5.66115	4.66428	5.19942	5.16966	5.41053	6.27351	6.83421	4.89635	7.0215	5.99093	5.27157	5.01421	5.38891	5.01112	6.17275	5.96959
30941	Usp21	No_BS	No_BS	No_BS	17.8784	17.6631	15.2042	19.2201	19.3272	14.4588	18.9743	17.7573	13.573	18.9898	18.2615	18.8224	17.7717	16.5667	15.8245	18.454	20.7299	16.5733	16.9152	17.6687	16.7682	18.6912	16.7209	18.5857
66155	Ufc1	No_BS	No_BS	No_BS	54.0275	94.0353	64.4916	55.0761	94.335	63.5343	69.3221	67.8258	52.6358	64.9905	73.0404	56.2297	66.855	89.4313	55.4788	59.6445	67.7684	58.4302	70.8515	70.9818	63.2612	64.7535	70.5884	61.9477
21945	Dedd	No_BS	No_BS	Merged-chr1-171333387-2 (+4242)	14.4064	16.9234	14.6755	14.927	16.7601	13.2239	19.1123	17.2311	15.4688	17.0042	18.005	17.6002	17.5969	17.8543	15.3537	17.9282	18.4517	16.5324	15.3351	14.9703	17.2707	17.5365	16.935	17.6374
27045	Nit1	No_BS	No_BS	Merged-chr1-171333387-2 (+12258)	10.8589	15.7262	10.4089	11.0631	14.8505	9.32039	12.9352	15.2711	10.7036	13.5703	15.0759	10.2303	14.1048	19.9805	11.4819	13.0088	16.6015	10.8365	12.3313	11.7447	12.97	12.9588	15.1891	13.4823
18637	Pfdn2	No_BS	No_BS	No_BS	144.535	146.69	92.8433	131.877	139.252	68.8462	149.788	130.083	83.3256	123.029	126.994	91.8465	153.226	136.326	93.0493	116.889	125.916	97.0311	128.023	113.325	121.066	113.956	127.534	113.279
68874	Klhdc9	No_BS	No_BS	No_BS	2.11001	1.87642	2.52418	1.74632	1.91699	2.86452	1.56405	1.82409	2.94985	1.69067	1.4293	2.37737	1.67289	2.10718	2.64793	1.55405	1.79801	2.55939	2.1702	2.17594	2.11266	1.83245	2.14267	1.97049
71740	Pvrl4	No_BS	No_BS	No_BS	0.670248	0.663922	0.656654	0.472114	0.43135	0.635607	0.437811	0.747224	0.971687	0.323198	0.697724	0.613386	0.603194	0.695023	1.32033	0.404281	0.428151	0.61467	0.663608	0.513024	0.718907	0.544769	0.872849	0.482367
226652	Arhgap30	No_BS	No_BS	No_BS	2.91725	2.42539	4.10237	2.41384	2.58252	3.86935	1.15911	1.20757	2.53991	1.10873	1.00058	2.64412	1.21748	0.858547	1.64972	1.43928	1.09425	1.85743	3.14834	2.95524	1.63553	1.58447	1.24191	1.46365
22278	Usf1	No_BS	No_BS	No_BS	40.8155	42.1301	30.5589	49.8178	49.8026	31.7917	49.1027	51.4303	31.6579	63.9166	68.8886	51.668	47.0452	56.4288	35.1427	70.83	74.3403	50.5584	37.8348	43.804	44.0636	61.4911	46.2056	65.2429
226654	Tstd1	chr1-256 (-3030)	No_BS	No_BS	2.06849	3.64962	2.86581	2.7191	5.18142	4.31764	3.05582	2.90391	5.836	3.30321	3.38831	5.61706	3.24578	3.777	4.78596	5.74686	5.25988	10.9619	2.86131	4.07272	3.93191	4.10286	3.93625	7.32289
16456	F11r	No_BS	No_BS	Merged-chr1-171453156-2 (+15621)	20.9006	31.6458	22.8488	22.3219	30.4313	15.3769	25.7335	32.4383	18.3859	26.5946	30.9834	20.7656	27.9445	33.5574	21.0259	31.5927	34.3712	20.9019	25.1318	22.7101	25.5192	26.1146	27.5092	28.9553
56009	Alyref2	No_BS	Merged-chr1-171503134-1 (-344)	Merged-chr1-171453156-2 (-50322)	2.36038	2.57086	3.2251	3.3101	2.96828	4.05576	2.76291	1.82824	3.93764	3.55848	3.10775	3.7482	2.57989	2.57397	4.2521	2.71655	2.86592	5.11252	2.71878	3.44471	2.84293	3.47148	3.13532	3.565
16429	Itln1	No_BS	No_BS	Merged-chr1-171551777-1 (-16483), Merged-chr1-171542488-1 (-7194), Merged-chr1-171528182-1 (+7112)	0	0	0	0	0.0368611	0	0.0328506	0	0	0	0	0.0377402	0	0.0388756	0	0	0	0	0	0.012287	0.0109502	0.0125801	0.0129585	0
18106	Cd244	chr1-186 (+169)	No_BS	Merged-chr1-171542488-1 (-16705), Merged-chr1-171551777-1 (-7416), Merged-chr1-171560878-1 (+1685), Merged-chr1-171590421-2 (+31228), Merged-chr1-171590979-2 (+31786)	0.00919039	0	0.0240107	0	0	0	0	0	0	0	0.0118285	0	0	0	0.0123109	0	0	0	0.011067	0	0	0.00394282	0.00410363	0
17085	Ly9	No_BS	No_BS	Merged-chr1-171590979-2 (+16431), Merged-chr1-171590421-2 (+16989), Merged-chr1-171560878-1 (+46532)	0	0.0152181	0	0	0	0	0	0.0140351	0	0	0	0	0	0	0	0	0	0	0.00507271	0	0.00467836	0	0	0
75345	Slamf7	No_BS	No_BS	No_BS	0	0	0.0226885	0	0.0105569	0.0254551	0	0	0.0118906	0	0	0	0	0	0	0	0	0	0.00756282	0.012004	0.00396352	0	0	0
102465784	Mir7683	No_BS	No_BS	No_BS	0	0	0	0	0	0	0	0	0	0	0	0	0	0	0	0	0	0	0	0	0	0	0	0
12506	Cd48	No_BS	No_BS	No_BS	0	0	0	0	0	0	0.0655286	0	0	0.0354168	0	0	0.0284735	0	0	0.036484	0	0	0	0	0.0218429	0.0118056	0.00949118	0.0121613
27218	Slamf1	No_BS	No_BS	No_BS	0	0	0	0	0	0	0	0	0	0	0	0	0	0	0	0	0.0126847	0.0348377	0	0	0	0	0	0.0158408
12523	Cd84	No_BS	No_BS	No_BS	0.497101	0.403571	1.30593	0.41431	0.322288	0.785206	0.221401	0.279148	0.431067	0.284603	0.213264	0.3231	0.291211	0.113301	0.347741	0.319831	0.218112	0.366907	0.735535	0.507268	0.310539	0.273656	0.250751	0.301617
30925	Slamf6	No_BS	Merged-chr1-172027287-2 (+109750)	No_BS	0	0	0.0369349	0	0	0	0	0	0	0	0	0	0	0	0.0189375	0	0	0	0.0123116	0	0	0	0.0063125	0
93840	Vangl2	No_BS	Merged-chr1-172027287-2 (+1157)	No_BS	9.39847	6.3856	3.59331	8.06566	6.16767	3.18039	8.14561	7.64306	3.68267	8.19657	6.78571	4.50783	7.87021	5.44675	4.97444	8.60948	8.53919	3.56343	6.45913	5.80457	6.49045	6.49671	6.09713	6.90403
18071	Nhlh1	No_BS	No_BS	No_BS	0	0	0	0	0	0	0	0	0.0190144	0	0	0	0.0130747	0.0178043	0	0	0	0	0	0	0.00633813	0	0.010293	0
59287	Ncstn	chr1-259 (-15343)	No_BS	No_BS	18.4119	19.5839	15.3916	18.4873	19.5586	15.1586	18.217	20.4178	12.1742	17.6517	20.5831	16.4115	19.4417	20.9377	17.7765	21.1023	22.2731	17.0559	17.7958	17.7348	16.9363	18.2154	19.3853	20.1438
12847	Copa	No_BS	No_BS	No_BS	46.438	47.9909	37.0558	47.0521	48.506	33.231	49.2344	56.7352	33.6507	48.2136	54.2654	40.9803	49.8815	61.4879	36.5097	52.1146	61.1879	32.3171	43.8282	42.9297	46.5401	47.8198	49.293	48.5399
19298	Pex19	chr1-259 (-28617)	No_BS	Merged-chr1-172133731-2 (+6976)	25.051	24.9729	27.2051	27.8833	29.6883	30.7811	26.5897	24.8201	28.772	25.7712	25.5691	29.1745	26.8359	27.9733	28.4442	29.462	28.6623	31.075	25.743	29.4509	26.7273	26.8383	27.7512	29.7331
98193	Dcaf8	No_BS	No_BS	Merged-chr1-172133731-2 (-14284)	28.5859	28.0004	26.9274	29.0532	29.3658	27.9931	30.7592	28.5828	30.7383	31.7473	28.894	32.8109	30.4579	27.1378	27.5757	33.3718	33.3586	29.9595	27.8379	28.804	30.0268	31.1507	28.3904	32.23
18611	Pea15a	No_BS	No_BS	No_BS	13.0091	11.8593	6.81203	10.1817	9.62751	6.13049	15.7401	19.3202	11.0347	10.6952	13.872	8.83323	20.9121	25.3484	12.7194	16.4338	20.4964	11.3416	10.5601	8.64657	15.365	11.1335	19.66	16.0906
12372	Casq1	No_BS	No_BS	No_BS	1.08736	1.07307	0.601868	0.51633	0.873749	0.594228	0.878517	0.892628	0.656088	0.345323	0.616721	0.412887	0.798171	1.06327	0.543124	0.422428	0.85514	0.39976	0.920767	0.661436	0.809078	0.45831	0.801522	0.559109
27222	Atp1a4	No_BS	No_BS	No_BS	0.416234	0.135771	0.129458	0.0537383	0.0602364	0	0.461671	0.281737	0.135692	0.0116057	0.0255101	0.0123346	0.251923	0.190585	0.119477	0.0478218	0.0684863	0	0.227154	0.0379916	0.293033	0.0164835	0.187329	0.0387694
98660	Atp1a2	No_BS	No_BS	No_BS	0.0554641	0.0443249	0.0289809	0.195489	0.11462	0.081287	0.0781145	0.0642386	0.0683474	0.214343	0.0642464	0.13116	0.0835504	0.0639977	0.0371482	0.863136	1.01298	0.398516	0.0429233	0.130465	0.0702335	0.136583	0.0615654	0.758211
140559	Igsf8	No_BS	No_BS	No_BS	11.4197	9.5749	5.70014	13.397	15.2552	10.2278	10.0248	9.58	7.01281	11.9961	11.2323	11.671	9.81913	8.92728	8.12528	23.7257	21.4172	25.1521	8.89823	12.96	8.87252	11.6331	8.95723	23.4317
16524	Kcnj9	No_BS	No_BS	No_BS	0.126743	0.0964653	0.137969	0.238631	0.0898756	0.123835	0.125867	0.111208	0.216921	0.148426	0.217499	0.170893	0.159103	0.108329	0.155629	0.305796	0.135551	0.157505	0.120393	0.150781	0.151332	0.178939	0.14102	0.199617
16513	Kcnj10	No_BS	Merged-chr1-172350624-2 (+9414)	No_BS	0.594042	0.29899	0.300384	0.317499	0.271771	0.290205	0.269883	0.25557	0.183663	0.299212	0.279517	0.174902	0.36083	0.32757	0.222466	0.562516	0.409888	0.251125	0.397805	0.293158	0.236372	0.25121	0.303622	0.407843
67556	Pigm	chr1-260 (+48949)	Merged-chr1-172350624-2 (-25907)	No_BS	5.70834	6.2982	6.16925	6.18982	6.01288	5.66428	5.85302	5.35696	4.93568	5.88868	4.85095	4.98636	5.44309	5.02522	5.73949	5.2074	5.45975	5.85196	6.0586	5.95566	5.38189	5.242	5.4026	5.50637
98365	Slamf9	chr1-260 (-49878)	No_BS	No_BS	0.844585	0.688737	0.827455	0.272603	0.586686	0.795733	0.490177	0.889272	0.660804	0.141296	0.271755	0.788391	0.851968	1.2375	1.09095	0.181942	0.327564	0.16357	0.786926	0.551674	0.680084	0.400481	1.06014	0.224358
93842	Igsf9	No_BS	No_BS	No_BS	8.85993	6.10616	4.83121	6.27345	5.45436	3.57384	6.23467	8.22468	5.1863	4.43582	5.98404	5.17978	8.25738	4.98129	7.34959	4.87347	6.42768	3.51522	6.5991	5.10055	6.54855	5.19988	6.86275	4.93879
21346	Tagln2	No_BS	No_BS	No_BS	130.503	160.374	108.611	88.6025	137.924	95.6311	111.303	170.115	112.679	80.6871	131.328	100.125	149.478	254.782	116.799	96.3232	190.047	108.585	133.163	107.386	131.366	104.046	173.687	131.652
71870	Cfap45	No_BS	No_BS	No_BS	0.473895	0.757441	0.371427	0.565329	0.368691	0.22225	0.821445	0.798351	0.493132	0.421775	0.219573	0.401078	0.963724	0.680472	0.558625	0.800365	0.711122	0.436867	0.534254	0.385423	0.70431	0.347475	0.734274	0.649451
71319	4933439K11Rik	No_BS	No_BS	No_BS	0.036703	0	0.0479448	0	0	0.161373	0.119289	0.0386449	0.100508	0.171928	0	0	0.0345556	0.188222	0.0983301	0.044277	0.217405	0.149273	0.0282159	0.0537911	0.086147	0.0573092	0.107036	0.136985
240916	Vsig8	No_BS	No_BS	No_BS	0.0183808	0	0	0.0166115	0.0446884	0	0	0.05806	0	0	0	0.0457542	0.0519161	0.0706961	0.0738653	0	0.0362921	0	0.00612693	0.0204333	0.0193533	0.0152514	0.0654925	0.0120974
74748	Slamf8	No_BS	No_BS	No_BS	0.0169301	0.0193285	0.0442314	0.0153005	0.0617423	0	0.0183416	0.0178259	0.0695423	0.0594794	0.0217899	0.0210716	0	0	0.0680358	0.0204239	0	0.0229519	0.02683	0.0256809	0.0352366	0.0341136	0.0226786	0.0144586
677296	Fcrl6	No_BS	No_BS	No_BS	0	0	0	0	0	0	0	0.0379988	0	0	0.0232243	0.0224588	0.0169889	0	0	0	0.0178142	0	0	0	0.0126663	0.0152277	0.00566297	0.00593807
68440	Dusp23	No_BS	No_BS	No_BS	0.170616	0.166959	0.127356	0.0660826	0.177776	0.214329	0.211245	0.384949	0.0333725	0.25689	0.0941101	0.30336	0.206529	0.281238	0.0979485	0.235228	0.312811	0.264343	0.154977	0.152729	0.209856	0.21812	0.195238	0.270794
12944	Crp	No_BS	No_BS	No_BS	0.0203401	0	0.0265701	0.0183822	0.049452	0	0	0.0214163	0.0556994	0.0238198	0	0	0.01915	0.0521546	0.0272464	0	0.0200803	0	0.0156367	0.0226114	0.0257052	0.00793992	0.0328504	0.00669345
20219	Apcs	No_BS	No_BS	No_BS	0	0	0	0	0	0	0	0	0	0	0	0	0	0	0	0	0	0	0	0	0	0	0	0
18313	Olfr16	No_BS	No_BS	No_BS	0	0	0	0	0	0	0	0	0	0	0	0	0	0	0	0	0	0	0	0	0	0	0	0
258759	Olfr1408	No_BS	No_BS	No_BS	0	0	0	0	0	0	0	0	0	0	0	0	0	0	0	0	0	0	0	0	0	0	0	0
258758	Olfr1406	No_BS	No_BS	No_BS	0	0	0	0	0.0394965	0	0	0	0	0	0	0.0404385	0	0	0.0435224	0	0	0	0	0.0131655	0	0.0134795	0.0145075	0
258880	Olfr218	No_BS	No_BS	No_BS	0	0	0	0	0	0	0	0	0	0	0	0	0	0	0	0	0	0	0	0	0	0	0	0
258881	Olfr1404	No_BS	No_BS	No_BS	0	0	0	0	0	0	0	0	0	0	0	0	0	0	0	0	0	0	0	0	0	0	0	0
14125	Fcer1a	No_BS	No_BS	No_BS	0	0	0	0	0	0	0	0	0	0	0	0	0	0	0	0	0	0	0	0	0	0	0	0
258645	Olfr418	No_BS	No_BS	No_BS	0	0	0	0	0	0	0	0	0	0	0	0	0	0	0	0	0	0	0	0	0	0	0	0
100504232	Mptx2	No_BS	No_BS	No_BS	0	0	0	0	0	0	0	0	0	0	0	0	0	0	0	0	0	0	0	0	0	0	0	0
13349	Ackr1	No_BS	No_BS	No_BS	0	0	0	0.0269542	0	0	0.0323116	0	0.0816732	0.104782	0.0383863	0	0.0280801	0.0382377	0	0.0359799	0.0294442	0.0808667	0	0.00898474	0.0379949	0.0477229	0.0221059	0.0487636
94332	Cadm3	No_BS	No_BS	No_BS	0.132868	0.0948069	0.054239	0.180118	0.0807593	0.121706	0.143946	0.104924	0.125073	0.155599	0.138944	0.124028	0.164187	0.138406	0.0889913	0.410736	0.401713	0.146353	0.0939715	0.127528	0.124647	0.139524	0.130528	0.319601
383619	Aim2	No_BS	No_BS	No_BS	7.24239	10.2578	7.16664	8.05854	9.53221	6.62396	8.27388	9.15931	9.24527	8.29007	9.68924	8.52267	6.71612	8.18565	5.47075	6.65124	6.96174	5.20448	8.22226	8.07157	8.89282	8.83399	6.79084	6.27249
545384	BC094916	No_BS	No_BS	No_BS	0	0	0	0	0	0	0	0.0562054	0	0	0	0	0	0	0	0	0	0	0	0	0.0187351	0	0	0
623121	Pydc4	No_BS	No_BS	No_BS	0	0	0	0	0	0	0	0	0	0	0	0	0	0	0	0	0	0	0	0	0	0	0	0
236312	Pyhin1	No_BS	No_BS	No_BS	0	0	0	0	0	0	0	0	0.0270453	0	0	0	0	0	0.0132297	0.0119144	0	0	0	0	0.00901512	0	0.00440991	0.00397147
100033459	Pydc3	No_BS	No_BS	No_BS	0.0462504	0.0924042	0.105729	0.0313488	0.0421675	0.101675	0.0626328	0.0243488	0.0474946	0.0541627	0.0892896	0.0575642	0.0217722	0.07412	0.0464657	0.0278974	0.0228299	0.078376	0.0814612	0.0583973	0.0448254	0.0670055	0.0474526	0.0430344
226691	AI607873	No_BS	No_BS	No_BS	0	0	0	0	0.0241084	0	0.0214854	0.0104407	0	0.0696744	0.0382871	0	0.0186717	0.012713	0	0.0837361	0	0	0	0.00803613	0.010642	0.0359872	0.0104616	0.027912
15951	Ifi204	No_BS	No_BS	Merged-chr1-173804902-2 (-38026)	0	0.0687237	0.0196584	0.0272009	0.036588	0.0220555	0.0652145	0.0158453	0.0412103	0.0881176	0	0	0.113348	0.0192938	0.0201587	0.145236	0.0297137	0.0204017	0.0294607	0.0286148	0.0407567	0.0293725	0.0509336	0.0651173
100040462	Mndal	No_BS	No_BS	Merged-chr1-173965304-2 (-22813)	0	0	0.0236457	0	0.0220046	0	0	0.0190592	0	0	0.0232974	0	0.051127	0	0	0	0.0178702	0	0.00788191	0.00733486	0.00635306	0.00776578	0.0170423	0.00595675
381308	Mnda	No_BS	No_BS	Merged-chr1-173804902-2 (+108020)	0.0193055	0.0440807	0	0	0.0234683	0	0.0418299	0	0	0.135649	0.024847	0.024028	0.145408	0.0247509	0	0.0465788	0	0	0.0211287	0.00782276	0.0139433	0.061508	0.0567195	0.0155263
15950	Ifi203	No_BS	No_BS	No_BS	0.0353072	0.0322471	0.0368972	0.0510538	0.0600886	0.0413964	0.0382507	0.00743506	0.0580112	0.132311	0.0272652	0.0351553	0.0797795	0.0452661	0.0472954	0.0851865	0.027885	0.0382922	0.0348172	0.0508462	0.0345657	0.0649106	0.057447	0.0504546
26388	Ifi202b	No_BS	No_BS	Merged-chr1-173965304-2 (+17540)	0.153842	0.131727	0.175842	0.104275	0.163638	0.140917	0.687503	0.222725	0.289631	0.833241	0.297002	0.215409	0.687994	0.39447	0.360635	0.927944	0.360708	0.286771	0.153803	0.136277	0.399953	0.448551	0.481033	0.525141
226695	Ifi205	No_BS	No_BS	No_BS	0	0.0244453	0	0	0	0	0	0	0	0	0	0	0	0	0	0	0	0.0290278	0.00814842	0	0	0	0	0.00967593
258712	Olfr433	No_BS	No_BS	No_BS	0	0	0	0	0	0	0	0	0	0	0	0	0	0	0	0	0	0	0	0	0	0	0	0
258711	Olfr432	No_BS	No_BS	No_BS	0	0	0	0	0	0	0	0	0	0	0	0	0	0	0	0	0	0	0	0	0	0	0	0
258713	Olfr430	No_BS	No_BS	No_BS	0	0	0	0	0	0	0	0	0	0	0	0	0	0	0	0	0	0	0	0	0	0	0	0
258717	Olfr429	No_BS	No_BS	No_BS	0	0	0	0	0	0	0	0	0	0	0	0	0	0	0	0	0	0	0	0	0	0	0	0
258134	Olfr426	No_BS	No_BS	No_BS	0	0	0	0	0	0	0	0	0	0	0	0	0	0	0	0	0	0	0	0	0	0	0	0
259162	Olfr427	No_BS	No_BS	No_BS	0	0	0	0	0	0	0	0	0	0	0	0	0	0	0	0	0	0	0	0	0	0	0	0
404222	Olfr231	No_BS	No_BS	No_BS	0	0	0	0	0	0	0	0	0	0	0	0	0	0	0	0	0	0	0	0	0	0	0	0
258716	Olfr424	No_BS	No_BS	No_BS	0	0	0	0	0	0	0	0	0	0	0	0	0	0	0	0	0	0	0	0	0	0	0	0
258715	Olfr421-ps1	No_BS	No_BS	No_BS	0	0.0375526	0	0	0	0	0.0712702	0	0	0	0	0	0	0	0	0	0	0	0.0125175	0	0.0237567	0	0	0
258302	Olfr420	No_BS	No_BS	No_BS	0	0	0	0	0	0	0	0	0	0	0	0	0	0	0	0.0398324	0.032597	0	0	0	0	0	0	0.0241431
20739	Spta1	No_BS	No_BS	No_BS	0.92867	0.356537	0.810532	2.56983	1.10894	1.93316	1.2821	1.38451	1.0915	2.41088	1.18995	1.58545	1.42757	0.64799	0.985284	4.91252	2.8843	3.09732	0.69858	1.87064	1.2527	1.72876	1.02028	3.63138
258710	Olfr419	No_BS	No_BS	No_BS	0.031744	0	0	0.0286884	0	0	0	0	0	0	0	0	0	0	0	0	0	0	0.0105813	0.00956281	0	0	0	0
66289	Mptx1	No_BS	No_BS	No_BS	0	0	0	0	0	0	0	0	0	0	0	0	0	0	0	0	0	0	0	0	0	0	0	0
258238	Olfr417	No_BS	No_BS	No_BS	0	0	0	0	0	0	0	0	0	0	0	0	0	0	0	0	0	0	0	0	0	0	0	0
258709	Olfr248	No_BS	No_BS	No_BS	0	0	0	0	0	0	0	0	0	0	0	0	0	0	0	0	0	0	0	0	0	0	0	0
258756	Olfr414	No_BS	No_BS	No_BS	0	0	0	0	0	0	0	0	0	0	0	0	0	0	0	0	0	0	0	0	0	0	0	0
546747	Olfr220	No_BS	No_BS	No_BS	0	0	0	0	0	0	0	0	0	0	0	0	0	0	0	0	0	0	0	0	0	0	0	0
54418	Fmn2	chr1-261 (+306450)	No_BS	No_BS	0.852446	0.826308	0.854417	0.843071	0.879842	0.691452	0.987405	0.982225	0.932269	0.872709	0.834929	0.760698	0.898477	0.666733	0.775621	1.11891	0.936831	0.675944	0.844391	0.804788	0.967299	0.822778	0.780277	0.91056
23893	Grem2	chr1-261 (+113544)	No_BS	No_BS	0	0.189518	0.036141	0.0250037	0.235428	0.040548	0.319717	0.699138	0.0252544	0.3996	0.890214	0.0229565	0.347309	1.53706	0.0247073	0.445017	0.883138	0.0625125	0.0752195	0.100327	0.348036	0.43759	0.63636	0.463556
24012	Rgs7	chr1-7 (-21282)	Merged-chr1-175512361-2 (-21231)	Merged-chr1-175512389-2 (-21259)	0.0416616	0.0634181	0.0362815	0.0627523	0.118172	0.14247	0.0601799	0.116976	0.0760576	0.130104	0.0893674	0.0691373	0.0653735	0.142434	0.111615	0.117271	0.0685493	0.0753065	0.0471204	0.107798	0.0844045	0.0962028	0.106474	0.0870423
14194	Fh1	chr1-7 (+113223)	Merged-chr1-175512361-2 (+113274)	Merged-chr1-175512389-2 (+113246)	70.1966	89.3703	101.76	67.5517	88.3943	110.447	77.7225	81.8879	121.178	64.9068	88.3852	99.9321	81.551	103.861	113.705	68.2413	87.9362	118.001	87.1089	88.7975	93.5959	84.4081	99.7056	91.3929
98256	Kmo	No_BS	No_BS	No_BS	0	0	0	0	0	0	0	0	0	0	0	0	0	0	0	0.0166792	0	0	0	0	0	0	0	0.00555974
13603	Opn3	No_BS	No_BS	No_BS	0.527141	0.267474	0.178526	0.758711	0.284803	0.257522	0.676845	0.575589	0.400979	0.73164	0.653327	0.461693	0.992598	0.625767	0.549209	0.777239	0.693878	0.661699	0.32438	0.433679	0.551138	0.615553	0.722525	0.710939
12663	Chml	No_BS	No_BS	No_BS	2.58636	2.17266	2.27941	2.9192	2.15553	2.78909	2.23914	2.14051	2.61341	2.92962	2.31124	2.57945	2.51479	1.54934	2.54166	3.14733	2.41395	3.18474	2.34614	2.62127	2.33102	2.60677	2.20193	2.91534
75820	Wdr64	No_BS	No_BS	No_BS	0.524941	0.661303	0.91036	0.629822	0.682142	0.729549	0.402015	0.390713	0.520474	0.381566	0.489244	0.518176	0.494228	0.313297	0.424332	0.425818	0.259118	0.441715	0.698868	0.680504	0.437734	0.462995	0.410619	0.375551
26909	Exo1	No_BS	No_BS	No_BS	13.6933	14.2295	16.9943	14.28	14.3813	15.325	14.2845	13.295	14.4546	15.338	15.21	16.1061	14.8942	13.8162	13.4188	13.3484	13.1221	13.2829	14.9724	14.6621	14.0114	15.5514	14.0431	13.2512
226720	Becn2	No_BS	No_BS	No_BS	0	0.0440807	0.0756557	0	0	0.0282937	0.0209149	0	0.0264331	0	0.024847	0.192224	0.0363519	0	0	0	0	0.0261721	0.0399121	0.00943123	0.0157827	0.072357	0.0121173	0.00872402
319455	Pld5	chr1-262 (-474181)	No_BS	Merged-chr1-176683202-2 (-407904)	0.00886941	0	0	0	0	0	0	0.0093387	0.024288	0.0103867	0	0.0110391	0.00835048	0.0113712	0.0118809	0.0106997	0.0175123	0	0.00295647	0	0.0112089	0.00714193	0.0105342	0.009404
545389	Cep170	chr1-262 (+57645)	No_BS	Merged-chr1-176683202-2 (+123922)	4.26112	3.51629	4.34234	5.11209	3.41088	4.03917	4.15203	3.75193	3.72578	5.2002	4.15649	3.48603	4.28396	3.22031	3.23116	4.96008	3.65565	3.55387	4.03991	4.18738	3.87658	4.2809	3.57848	4.05653
723921	Mir350	No_BS	No_BS	No_BS	0	0	0	0	0	0	0	0	0	0	0	0	0	0	0	0	0	0.472948	0	0	0	0	0	0.157649
76816	Sdccag8	chr1-20 (+160296), chr1-115 (+183391)	Merged-chr1-176975087-2 (+160427)	No_BS	1.86959	1.92099	1.59559	1.92617	1.5606	1.53442	2.44404	1.92914	1.46764	1.94129	1.76458	1.61334	2.27653	1.82167	1.86994	1.98475	1.79649	1.94317	1.79539	1.67373	1.94694	1.77307	1.98938	1.90814
15365	Hmga2-ps1	No_BS	No_BS	No_BS	0.251598	0.182789	0.268903	0.516772	0.278045	0.435779	0.867278	0.409406	0.344488	0.749991	0.382694	0.398547	0.667563	0.410537	0.367664	1.02092	0.474189	0.71318	0.23443	0.410198	0.540391	0.510411	0.481921	0.736097
23797	Akt3	chr1-115 (+260152), chr1-20 (+283247)	Merged-chr1-177258144-2 (+59), Merged-chr1-176975087-2 (+283116)	No_BS	6.2875	4.2553	3.48732	7.85104	5.3822	4.79984	5.98985	4.94593	5.0235	7.89273	6.22413	5.26546	5.94023	4.82537	4.9049	8.51773	6.22881	5.04311	4.67671	6.01103	5.31976	6.46077	5.2235	6.59655
30928	Zbtb18	No_BS	Merged-chr1-177441834-2 (-2827)	Merged-chr1-177441868-2 (-2793), Merged-chr1-177555830-1 (+111169)	4.01111	3.96928	3.14557	5.77679	3.65907	3.6481	3.9498	3.64646	2.95439	6.93903	5.798	4.18411	3.87832	3.22599	2.89945	7.49083	5.25536	4.72253	3.70865	4.36132	3.51688	5.64038	3.33459	5.82291
75589	2310043L19Rik	No_BS	No_BS	No_BS	0	0	0	0	0	0	0	0	0	0	0	0	0	0	0	0	0	0	0	0	0	0	0	0
69428	1700016C15Rik	No_BS	No_BS	Merged-chr1-177555830-1 (-173984)	0.0461115	0.157931	0	0.0416729	0	0.13516	0.0499557	0.0485513	0	0	0	0.114783	0.0868272	0	0	0	0.0455226	0.0625125	0.0680143	0.0589443	0.0328357	0.0382609	0.0289424	0.0360117
11566	Adss	No_BS	No_BS	Merged-chr1-177977512-2 (-181001)	60.8904	73.5474	119.019	56.7042	69.7443	112.08	66.553	63.9128	116.12	69.0734	70.7948	106.026	70.2811	72.6715	104.761	68.2498	63.9725	109.673	84.4857	79.5095	82.1951	81.9646	82.5711	80.6317
545391	Gm16432	No_BS	No_BS	Merged-chr1-177977512-2 (-13923)	0	0	0	0	0	0	0	0	0	0	0	0	0	0	0	0.0250539	0.020503	0	0	0	0	0	0	0.0151856
78825	Desi2	No_BS	No_BS	No_BS	14.0347	15.6111	11.2763	14.6989	13.6129	13.144	12.8512	13.0941	11.9878	12.586	15.1512	12.6724	13.5068	14.2728	12.7493	14.5475	15.0856	13.1252	13.6407	13.8186	12.6444	13.4699	13.5097	14.2528
66359	Cox20	No_BS	Merged-chr1-178336733-2 (+17603)	No_BS	45.0221	32.7411	103.525	39.3646	34.3937	103.156	26.6428	27.8419	126.772	37.1056	27.9805	95.2794	31.0651	24.2152	96.8659	28.0865	30.8999	112.038	60.4295	58.9713	60.4189	53.4552	50.7154	57.0081
51810	Hnrnpu	No_BS	Merged-chr1-178336733-2 (+1064)	No_BS	360.677	319.202	395.669	385.714	297.806	364.611	371.12	285.816	343.031	415.436	319.214	376.146	375.564	230.168	327.506	374.301	287.116	368.795	358.516	349.377	333.322	370.265	311.079	343.404
68226	Efcab2	No_BS	No_BS	No_BS	1.8371	1.28948	2.29313	2.34897	1.2076	3.09129	1.56272	1.26088	2.86937	2.19919	2.48703	2.37118	1.48619	1.63997	1.78641	2.34754	1.78677	2.91483	1.80657	2.21595	1.89766	2.35247	1.63752	2.34971
269152	Kif26b	chr1-263 (+167889), chr1-10 (+543219)	Merged-chr1-178707919-2 (+178794), Merged-chr1-179072464-2 (+543339)	Merged-chr1-179238871-2 (+709746)	0.0233172	0.0212964	0.0426427	0.0421456	0.017007	0.0273386	0.0606268	0.024551	0.0127704	0.0709962	0.0360124	0.0174127	0.0570778	0.0179365	0.0562218	0.0843871	0.0506428	0.0252886	0.0290854	0.0288304	0.0326494	0.0414738	0.0437454	0.0534395
69726	Smyd3	chr1-10 (+445690), chr1-263 (+821020)	Merged-chr1-179072464-2 (+445570), Merged-chr1-178707919-2 (+810115)	Merged-chr1-179238871-2 (+279163)	4.46297	5.72425	5.638	3.62672	4.72203	4.54897	5.27278	5.2599	4.27498	4.60273	4.76307	4.49177	4.64278	4.92123	3.64112	3.93272	3.67164	3.72234	5.27507	4.29924	4.93589	4.61919	4.40171	3.77557
15278	Tfb2m	No_BS	No_BS	No_BS	9.05762	11.9837	18.7983	8.63203	10.0674	16.3762	9.70576	10.2351	15.705	8.55842	9.35149	14.4516	9.78957	10.2197	14.0985	7.65895	8.21768	13.752	13.2799	11.6919	11.8819	10.7872	11.3693	9.87621
226744	Cnst	No_BS	No_BS	No_BS	2.78884	2.5853	2.68016	2.95305	3.08535	2.66173	2.60148	3.08041	2.58033	3.23924	2.86562	2.62929	2.40388	2.8935	2.61605	3.31851	3.03079	2.53425	2.68477	2.90004	2.75408	2.91138	2.63781	2.96118
109232	Sccpdh	No_BS	No_BS	No_BS	10.5661	12.1245	15.9385	9.66271	11.359	14.0633	9.59755	11.7495	12.7202	8.56478	11.1707	9.70654	9.62645	18.2001	10.5431	10.0368	13.784	11.7664	12.8764	11.695	11.3558	9.81399	12.7899	11.8624
226747	Ahctf1	chr1-187 (-148092)	No_BS	No_BS	33.9469	29.5269	39.9714	33.4044	28.3258	36.2593	31.6969	31.4523	38.464	32.692	28.4396	34.0783	32.4394	24.1528	32.6852	30.6293	26.2895	32.9147	34.4818	32.6632	33.8711	31.7366	29.7592	29.9445
226751	Cdc42bpa	chr1-187 (-8813)	No_BS	No_BS	4.49674	3.11579	2.85624	5.25025	3.58442	2.82442	4.11084	3.51634	2.83536	5.74729	4.19556	3.57555	4.74453	2.20987	2.806	6.0408	3.5806	2.34758	3.48959	3.88636	3.48751	4.50613	3.25347	3.98966
67426	Adck3	No_BS	No_BS	Merged-chr1-180210865-2 (-14845)	4.21974	4.33384	3.53092	4.45681	5.51075	4.56997	3.74536	3.40809	3.78217	3.94934	3.69701	3.90207	3.18307	3.21557	4.1429	5.51986	4.36662	5.76658	4.02817	4.84585	3.64521	3.84947	3.51385	5.21768
19165	Psen2	chr1-133 (-26766)	Merged-chr1-180284201-2 (-31063)	Merged-chr1-180210865-2 (+42273)	3.86144	4.42738	3.05248	3.53468	4.65378	2.21026	3.78836	4.34494	2.70027	3.2217	3.32745	2.24831	3.90076	4.05823	3.44096	3.65866	4.0739	2.74101	3.78043	3.46624	3.61119	2.93249	3.79999	3.49119
277333	Gm5069	No_BS	No_BS	Merged-chr1-180411994-2 (-81444)	0.742638	0.46246	0.566943	0.784465	0.539318	0.296835	0.794102	0.375733	0.237698	1.07299	0.508938	0.444146	0.726429	0.581158	0.310065	0.721366	0.466552	0.326877	0.59068	0.540206	0.469178	0.675357	0.539217	0.504932
320404	Itpkb	chr1-133 (-50581)	Merged-chr1-180284201-2 (-46284)	No_BS	0.83957	0.610662	0.19458	1.40737	0.847761	0.367153	0.740855	1.8464	0.37082	1.88711	2.15242	0.825845	1.04543	2.4045	0.544179	1.23336	1.93175	0.238653	0.548271	0.874094	0.986026	1.62179	1.33137	1.13459
381310	6330403A02Rik	No_BS	No_BS	Merged-chr1-180411994-2 (+71473)	0.0263363	0.0180404	0.00688059	0.00476026	0	0.0154392	0.0114128	0.0166379	0.0144239	0.0123367	0.0135584	0.00655576	0.00991819	0	0.00705572	0.0508339	0.0156	0.00714074	0.0170858	0.00673315	0.0141582	0.010817	0.00565797	0.0245249
11545	Parp1	No_BS	No_BS	No_BS	159.755	143.235	125.056	141.286	129.969	99.2377	154.937	143.189	104.932	136.726	129.637	120.388	145.642	117.299	108.8	123.1	126.077	87.8567	142.682	123.498	134.353	128.917	123.914	112.345
102466761	Mir6904	No_BS	No_BS	No_BS	1.03097	0	2.02012	1.3976	0	0	0.55846	0	1.41161	1.20734	0.663453	1.28317	0.97065	1.32177	1.38102	0.621861	1.0178	0	1.01703	0.465866	0.656689	1.05132	1.22448	0.546555
72568	Lin9	No_BS	No_BS	No_BS	7.56327	9.37091	12.1499	8.26749	9.47314	11.7413	8.66744	8.71146	12.1963	10.6875	9.56548	12.651	8.59225	9.02401	9.17966	9.44048	8.90175	12.5204	9.6947	9.82732	9.85841	10.968	8.93197	10.2875
27217	Mixl1	No_BS	Merged-chr1-180696759-2 (+275)	No_BS	0.271592	0.189485	0.0591298	0.409083	0.128394	0.243247	0.0980782	0.142981	0.0619774	0.318055	0.194195	0.206574	0.213085	0.193444	0.141481	0.400447	0.178749	0.204552	0.173402	0.260241	0.101012	0.239608	0.18267	0.261249
170760	Acbd3	No_BS	No_BS	Merged-chr1-180777520-1 (+51477)	10.3981	10.3375	9.87847	12.2298	10.4024	8.91019	11.2542	11.2521	8.89645	12.0604	12.9089	9.54834	12.2816	13.7009	9.83667	13.4561	12.7113	10.9669	10.2047	10.5141	10.4676	11.5059	11.9397	12.3781
15078	H3f3a	No_BS	No_BS	Merged-chr1-180777520-1 (+36112)	379.27	442.674	646.635	411.6	382.779	781.889	423.374	315.726	773.848	376.756	379.737	673.675	400.204	384.234	800.553	390.858	342.105	893.966	489.526	525.423	504.316	476.723	528.331	542.31
208768	Sde2	No_BS	No_BS	No_BS	26.1142	30.7531	35.1452	25.577	27.2835	28.6885	31.341	28.2939	31.1306	27.6402	26.3921	31.8151	29.9888	25.9013	29.9195	27.1147	25.3639	27.0657	30.6709	27.183	30.2552	28.6158	28.6032	26.5148
320202	Lefty2	chr1-188 (-3035)	Merged-chr1-180890076-2 (-3032)	No_BS	20.3913	20.0275	27.5719	22.1066	32.8235	49.5068	29.6324	16.8156	42.1391	23.0415	9.57302	46.7764	24.5627	17.5966	29.0068	39.3453	14.9492	39.2877	22.6636	34.8123	29.529	26.4637	23.722	31.1941
69051	Pycr2	No_BS	No_BS	No_BS	82.7906	83.2497	78.6074	95.591	112.773	123.331	109.559	87.8306	115.9	89.0621	68.0253	145.491	96.5335	90.9401	140.269	103.575	81.1362	153.145	81.5493	110.565	104.43	100.86	109.247	112.619
13590	Lefty1	chr1-116 (-1174)	Merged-chr1-180933866-2 (-1156)	No_BS	71.3574	53.6143	76.281	205.745	234.136	300.517	121.745	56.8145	164.715	210.954	98.7407	357.02	94.2257	45.4939	154.512	317.525	86.7078	376.239	67.0842	246.799	114.425	222.239	98.0774	260.157
208795	Tmem63a	No_BS	No_BS	No_BS	4.51045	3.49381	2.75794	5.73379	5.7682	3.15675	5.04821	4.79401	3.63535	4.64523	4.07596	4.45919	5.17016	3.13058	4.685	7.85957	5.73712	5.7678	3.5874	4.88625	4.49253	4.39346	4.32858	6.45483
13849	Ephx1	No_BS	No_BS	No_BS	4.04493	5.8494	4.82321	3.29939	6.2788	3.98251	3.6855	5.39467	4.91349	4.10533	4.75216	4.67296	3.16379	6.30282	4.47361	2.77765	4.27997	3.00897	4.90585	4.52023	4.66455	4.51015	4.64674	3.35553
619326	9130409I23Rik	No_BS	No_BS	No_BS	0	0	0.118851	0	0	0.0533377	0.0394276	0	0.0498301	0.0426196	0	0.0452962	0	0	0	0	0.0179644	0	0.0396172	0.0177792	0.0297526	0.0293053	0	0.00598813
67459	Nvl	No_BS	No_BS	No_BS	45.1019	43.8886	53.9328	41.9641	41.7378	46.8129	46.5876	43.5784	55.1703	42.4815	41.4153	46.6385	46.3205	39.6343	46.5062	38.9279	38.3306	38.7275	47.6411	43.5049	48.4454	43.5118	44.1537	38.662
98417	Cnih4	No_BS	No_BS	No_BS	17.5647	22.1523	21.7021	15.5301	19.3094	24.9835	18.8229	17.27	26.1043	14.8021	17.0297	21.7167	19.5817	24.714	28.172	14.4577	17.0795	25.3165	20.473	19.941	20.7324	17.8495	24.1559	18.9512
226757	Wdr26	chr1-264 (-44986)	Merged-chr1-181256550-2 (-44998)	Merged-chr1-181256553-2 (-45001)	18.1681	18.9122	18.5855	22.0046	20.5426	20.1191	21.2331	21.3225	18.0915	28.4562	23.6859	20.9959	21.1472	18.3539	18.8222	28.4446	24.1051	22.5372	18.5552	20.8887	20.2157	24.3794	19.4411	25.0289
72978	Cnih3	chr1-264 (-96090)	Merged-chr1-181256550-2 (-96078)	Merged-chr1-181256553-2 (-96075)	0.2533	0.202429	0.082721	0.206026	0.200147	0.167054	0.233255	0.240032	0.208091	0.148317	0.309709	0.267973	0.250404	0.373459	0.271445	0.10695	0.137536	0.154528	0.179483	0.191076	0.227126	0.242	0.298436	0.133005
403180	Ccdc121	No_BS	No_BS	No_BS	0	0	0	0	0.0230812	0.0278271	0	0	0	0.0444705	0	0.0236317	0.0357524	0	0	0.0687158	0.0187446	0.0257404	0	0.0169694	0	0.0227008	0.0119175	0.0377336
98386	Lbr	chr1-265 (-81373), chr1-51 (-10785)	Merged-chr1-181923711-1 (-81310), Merged-chr1-181853183-2 (-10782)	Merged-chr1-181951672-1 (-109271), Merged-chr1-181853149-1 (-10748)	55.1802	52.7401	63.3428	67.8039	67.1141	81.0848	56.5993	53.4416	82.2628	73.8663	76.4884	96.5251	55.9065	60.8217	71.6107	70.145	71.7445	98.7978	57.0877	72.0009	64.1012	82.2932	62.7796	80.2291
13800	Enah	chr1-189 (+72), chr1-265 (+96206), chr1-51 (+166794)	Merged-chr1-182055362-2 (-35382), Merged-chr1-182019914-2 (+66), Merged-chr1-181923711-1 (+96269), Merged-chr1-181853183-2 (+166797)	Merged-chr1-182116238-2 (-96258), Merged-chr1-182019844-2 (+136), Merged-chr1-181951672-1 (+68308), Merged-chr1-181853149-1 (+166831)	54.023	52.4725	66.0937	48.0064	48.2143	70.5619	68.3879	54.5046	82.1646	70.475	51.2881	79.9039	63.8168	37.4116	75.9968	50.084	39.7382	72.783	57.5297	55.5942	68.3524	67.2223	59.0751	54.2017
27058	Srp9	No_BS	Merged-chr1-182055362-2 (-69388)	Merged-chr1-182116238-2 (-8512)	85.6968	48.6628	121.306	74.5019	37.871	153.639	75.4267	48.2857	154.2	61.4849	54.5714	117.035	67.9854	51.5209	154.759	71.4424	42.9644	165.9	85.2219	88.6707	92.6373	77.6971	91.4217	93.4357
625823	Vmn1r1	chr1-52 (-23796)	Merged-chr1-182191423-2 (-33104)	No_BS	0.0375	0	0.0489859	0.0338903	0	0	0	0	0	0.0439153	0.0482642	0	0.0353059	0	0	0	0	0	0.0288286	0.0112968	0	0.0307265	0.0117686	0
13244	Degs1	chr1-52 (+100689)	Merged-chr1-182191423-2 (+91381)	No_BS	34.3308	51.2298	51.349	40.3512	57.8782	46.8558	40.0855	45.5785	39.6235	48.9991	56.6672	49.9539	41.2095	66.8054	41.3725	45.8208	53.4999	46.7518	45.6365	48.3617	41.7625	51.8734	49.7958	48.6908
67330	1700047M11Rik	No_BS	No_BS	No_BS	0.0503462	0	0	0	0	0	0	0	0.0689341	0	0	0	0	0	0	0.0607357	0	0	0.0167821	0	0.022978	0	0	0.0202452
67948	Fbxo28	No_BS	No_BS	No_BS	9.77847	11.3162	10.487	10.6669	10.7248	10.3749	10.1748	10.2218	10.9246	11.0973	11.1196	11.0768	10.6095	10.5809	10.7539	10.5837	10.7709	11.4648	10.5272	10.5889	10.4404	11.0979	10.6481	10.9398
209456	Trp53bp2	chr1-134 (+80754)	Merged-chr1-182489902-2 (+80730)	Merged-chr1-182408821-2 (-351)	9.80801	7.94018	6.22539	10.1067	8.40655	5.99996	9.35849	8.87902	6.41699	10.1346	8.6258	7.55454	9.52436	7.28531	6.93436	9.20056	8.80889	5.90362	7.99119	8.17108	8.21817	8.77165	7.91468	7.97102
12334	Capn2	chr1-134 (+27569)	Merged-chr1-182489902-2 (+27593)	No_BS	14.4656	13.9398	9.07987	8.1438	9.42514	6.945	16.9051	23.8056	12.5905	12.3179	14.8636	10.0953	21.7255	28.2359	17.271	15.8417	19.9761	10.1876	12.4951	8.17131	17.7671	12.4256	22.4108	15.3352
170725	Capn8	chr1-190 (+20380)	Merged-chr1-182686474-1 (+121467)	No_BS	0	0	0	0	0	0	0	0.0196302	0	0	0	0	0	0	0	0	0	0	0	0	0.00654339	0	0	0
433386	Ccdc185	chr1-190 (+163793)	Merged-chr1-182686474-1 (+62706)	No_BS	0.0168066	0.0191874	0	0	0.0204305	0	0.0182077	0	0	0.0196817	0	0	0	0	0	0	0.0165919	0.0227844	0.011998	0.00681018	0.00606924	0.00656058	0	0.0131254
96935	Susd4	No_BS	Merged-chr1-182908600-1 (+143705)	No_BS	2.32513	1.87947	1.68492	1.47246	1.54735	1.01981	2.09608	2.85916	1.88226	1.88814	2.38093	1.83773	2.26898	3.35087	1.88695	2.17025	1.87656	1.05838	1.96317	1.34654	2.27916	2.0356	2.50227	1.70173
53791	Tlr5	No_BS	Merged-chr1-182908600-1 (-46188), Merged-chr1-182953553-2 (-1235)	No_BS	0.097167	0.295819	0.394889	0.0780569	0.078746	0.221521	0.16375	0.272822	0.162606	0.18965	0.111163	0.107499	0.223623	0.207624	0.159083	0.0390729	0.0959261	0.0585456	0.262625	0.126108	0.199726	0.136104	0.196777	0.0645149
68897	Disp1	No_BS	No_BS	No_BS	1.93643	1.45365	1.11751	2.15758	1.69293	1.31209	2.01166	2.15061	0.989723	2.08132	2.11673	1.13903	1.94801	2.16805	1.32361	2.45604	2.05574	1.26764	1.50253	1.72087	1.71733	1.77903	1.81323	1.92647
71678	Brox	No_BS	No_BS	No_BS	8.20465	9.66359	15.0648	9.27539	10.9335	15.7154	9.21346	10.0067	14.7777	11.5978	11.19	14.8884	8.71254	11.7617	11.9945	10.8864	10.2802	12.9519	10.9777	11.9748	11.3326	12.5587	10.8229	11.3728
108909	Aida	No_BS	No_BS	No_BS	12.869	16.2367	14.9473	12.6444	16.0774	15.279	13.635	12.5118	14.8487	13.7194	14.7676	15.0641	13.3602	17.0502	13.5857	15.2716	14.734	16.2092	14.6843	14.6669	13.6652	14.517	14.6653	15.4049
338366	Mia3	No_BS	No_BS	No_BS	9.62705	8.74472	7.08096	9.82554	8.05315	5.79686	9.96894	10.0717	6.23642	10.242	8.97468	7.2887	10.0768	8.60494	6.4582	11.4097	9.70137	6.17484	8.48424	7.89185	8.75902	8.83512	8.37997	9.09532
21339	Taf1a	No_BS	No_BS	No_BS	6.28966	7.73671	10.7246	6.23757	6.17423	8.15752	6.13564	7.39898	8.63087	5.81757	5.6594	6.92765	6.94355	6.40462	8.64893	5.17032	5.74226	7.86652	8.25032	6.85644	7.3885	6.13487	7.33237	6.2597
78772	Hhipl2	No_BS	No_BS	No_BS	0.0355446	0.0270533	0.0464316	0	0.028806	0.0347289	0.0641798	0.0374253	0.0486677	0.0416253	0.0304984	0.0147465	0.011155	0	0.0158711	0.0285864	0.0233938	0.0481871	0.0363432	0.0211783	0.0500909	0.0289567	0.0090087	0.0333891
73363	1700056E22Rik	No_BS	No_BS	No_BS	0.214297	0.163103	0.0466557	0.322782	0.17367	0.10469	0.270856	0.413665	0.146708	0.501915	0.505651	0.400077	0.302638	0.320533	0.191373	0.344692	0.63468	0.290518	0.141352	0.20038	0.277076	0.469214	0.271514	0.423297
63953	Dusp10	No_BS	No_BS	No_BS	0.853249	1.01774	0.432528	1.26601	0.913385	0.578592	1.54524	1.13976	1.06365	2.02826	2.31108	1.29973	1.46278	1.71435	0.870015	2.07402	2.16246	1.31212	0.767839	0.91933	1.24955	1.87969	1.34905	1.84953
73590	1700112H15Rik	No_BS	No_BS	No_BS	0	0	0.173969	0	0	0	0	0	0.0607825	0	0	0	0	0	0	0	0	0	0.0579898	0	0.0202608	0	0	0
74971	4930488B22Rik	No_BS	No_BS	No_BS	0	0	0	0	0	0	0	0	0	0	0	0	0	0	0	0	0	0	0	0	0	0	0	0
15284	Hlx	No_BS	No_BS	No_BS	0.0160864	0.0367305	0.0210135	0.014538	0.0391101	0	0.0522825	0.0508126	0	0.0188384	0.0621118	0	0.0908713	0.123743	0.0215484	0.058218	0.0635238	0.021808	0.0246101	0.0178827	0.034365	0.0269834	0.0787208	0.04785
66112	2017-03-01	No_BS	No_BS	No_BS	0	0	0.0421251	0.0145719	0	0	0.0349364	0.0169771	0	0	0.0415045	0.0200682	0.0303611	0.0413439	0.0431973	0.0389026	0.0318361	0.0218589	0.0140417	0.0048573	0.0173045	0.0205242	0.0383008	0.0308659
67247	2017-03-02	No_BS	No_BS	No_BS	12.5091	16.5427	18.2333	11.6033	17.28	19.1395	14.6448	22.9429	20.1411	13.7469	20.8919	17.9889	14.0048	30.3582	18.2551	15.7321	26.5637	24.1445	15.7617	16.0076	19.2429	17.5426	20.8727	22.1468
100316821	Mir1981	No_BS	No_BS	No_BS	0.421189	0	0	0	0	0	0.456303	0	0	0	0	0	0	0	0	0	0	0	0.140396	0	0.152101	0	0	0
226777	C130074G19Rik	No_BS	No_BS	No_BS	1.69479	1.09183	1.09113	0.995578	0.66222	0.798382	1.71805	1.33835	1.39231	1.19084	1.58922	1.11496	1.55005	0.791533	1.44323	2.51186	1.72095	1.93655	1.29259	0.818727	1.4829	1.29834	1.2616	2.05645
226778	Mark1	No_BS	No_BS	Merged-chr1-185117468-1 (-117919), Merged-chr1-185014695-1 (-15146)	2.37563	1.39928	1.03772	1.69569	1.2508	0.632025	2.38517	2.39777	1.55385	1.96692	1.47035	1.16764	2.84922	1.89145	2.10799	2.82937	2.48721	1.86672	1.60421	1.19284	2.11226	1.53497	2.28289	2.39443
98732	Rab3gap2	No_BS	No_BS	Merged-chr1-185014695-1 (-189473), Merged-chr1-185117468-1 (-86700)	11.6048	12.1654	8.80628	10.8674	12.0823	6.79438	11.9136	12.2188	7.81605	10.6093	9.96784	7.70772	11.4376	10.5502	7.24287	9.77821	10.022	5.99679	10.8588	9.9147	10.6495	9.42827	9.74358	8.59901
100217449	Snora36b	No_BS	No_BS	No_BS	0	0.34894	0	0	0	0	0	0	0	0	0	0	0	0	0	0	0	0	0.116313	0	0	0	0	0
100316737	Mir664	No_BS	No_BS	No_BS	0.500543	0	0	0	0	0	0	0	0	0	0	0	0	0	0	0	0	0	0.166848	0	0	0	0	0
381314	Iars2	No_BS	No_BS	No_BS	32.2838	27.9464	31.9126	30.8339	28.9505	33.4447	31.6035	30.6328	32.2739	33.0651	32.3088	38.2625	31.9565	28.0561	28.5558	30.8837	32.1123	29.2967	30.7143	31.0763	31.5034	34.5455	29.5228	30.7642
387189	Mir194-1	No_BS	No_BS	No_BS	0	0	0	1.3976	0	0	0	0.54276	0	0	0	0.641583	0	0	0	0	0	0	0	0.465866	0.18092	0.213861	0	0
387211	Mir215	No_BS	No_BS	No_BS	0.311149	0.355227	0	0	0	0	0	0	0	0	0	0.387262	0	0	0	0	0	0	0.222125	0	0	0.129087	0	0
23827	Bpnt1	No_BS	No_BS	Merged-chr1-185351873-2 (+19724)	19.9912	27.9192	24.4602	29.0673	45.5636	36.2117	20.9891	23.3155	23.8394	38.0548	39.8677	47.3399	21.4742	27.5173	20.0578	31.3345	34.9246	38.1527	24.1235	36.9475	22.7147	41.7541	23.0164	34.8039
107508	Eprs	No_BS	No_BS	Merged-chr1-185351873-2 (-11222)	111.745	93.2097	121.144	95.6727	84.3763	110.826	112.513	105.878	134.359	98.4963	100.598	121.921	113.943	87.5817	107.266	86.0784	93.1711	93.8078	108.699	96.9584	117.583	107.005	102.93	91.0191
319562	9630028B13Rik	No_BS	No_BS	No_BS	0.0304206	0.0347301	0.0264921	0.073313	0.0862869	0.059445	0.0109856	0.0533836	0.0833038	0.0237498	0.0783054	0.100966	0.0381876	0.0650019	0.0679159	0	0.0400428	0.0687344	0.0305476	0.073015	0.0492243	0.0676736	0.0570352	0.036259
100039138	Gm2061	No_BS	No_BS	No_BS	0.012509	0.0714056	0	0.011305	0.0152064	0.054999	0.0271038	0.0131709	0	0.0585961	0.0321995	0	0.0471087	0	0.0167564	0	0.0123493	0	0.0279716	0.0271701	0.0134249	0.0302652	0.0212884	0.00411643
226781	Slc30a10	chr1-89 (+424389), chr1-22 (+530139)	Merged-chr1-185879264-2 (+424416), Merged-chr1-185984965-2 (+530117)	Merged-chr1-185984963-2 (+530115)	0.0947043	0.0810904	0.108248	0.0481434	0.043172	0.0693984	0.0769498	0.0436254	0.145878	0.0623845	0.0761805	0.0957702	0.039009	0.05312	0.103074	0.0499834	0.0350606	0.0160486	0.0946807	0.0535713	0.0888177	0.0781118	0.0650676	0.0336975
114668	5033404E19Rik	No_BS	No_BS	No_BS	0.243565	0.278069	0.699967	0.264144	0.296084	0.642534	0.211096	0.153871	0.400187	0	0	0.424404	0.0917257	0.187359	0.522023	0	0.192363	0.264157	0.4072	0.400921	0.255052	0.141468	0.267036	0.152173
100124483	Mir297c	No_BS	No_BS	No_BS	0	0	0	0	0	0	0	0	0	0	0	0	0	0	0	0	0	0	0	0	0	0	0	0
226791	Lyplal1	chr1-22 (+132323), chr1-89 (+238073)	Merged-chr1-185984965-2 (+132345), Merged-chr1-185879264-2 (+238046)	Merged-chr1-185984963-2 (+132347)	11.5855	13.6268	13.7608	10.7276	14.6694	13.4167	14.3546	14.0433	13.7638	13.2084	13.9527	15.1283	15.0728	17.9139	14.0817	12.6817	14.551	13.7764	12.991	12.9379	14.0539	14.0965	15.6895	13.6697
320449	A730004F24Rik	No_BS	No_BS	No_BS	0	0	0	0	0	0	0	0	0	0	0	0	0	0	0	0	0	0	0	0	0	0	0	0
21808	Tgfb2	No_BS	No_BS	No_BS	0.577452	0.542426	0.324644	0.303873	0.337655	0.289243	0.696864	0.33094	0.590484	0.40232	0.395123	0.673221	1.52089	0.627876	0.577692	0.432078	0.331944	0.396375	0.481508	0.310257	0.539429	0.490221	0.908819	0.386799
67223	Rrp15	No_BS	No_BS	Merged-chr1-186749405-2 (-47)	57.9044	70.0114	73.4066	56.0134	63.1503	51.7451	60.9413	62.9485	59.3451	57.165	65.2833	61.7482	64.175	67.1862	54.0132	50.5339	56.1522	60.8066	67.1075	56.9696	61.0783	61.3988	61.7915	55.8309
110957	D1Pas1	chr1-100 (+204201), chr1-23 (+204692)	No_BS	Merged-chr1-187171588-2 (+204172), Merged-chr1-187172193-2 (+204777)	9.18276	8.88775	13.8213	8.46405	7.93423	11.9137	8.17765	4.98149	7.53794	8.24785	4.31781	6.89223	7.12696	3.41882	4.88282	5.92801	3.40752	4.38773	10.6306	9.43732	6.89903	6.48597	5.14287	4.57442
74717	Spata17	chr1-23 (+43338), chr1-100 (+43829)	No_BS	Merged-chr1-187172193-2 (+43253), Merged-chr1-187171588-2 (+43858)	0.0629863	0.0479394	0.137131	0.0569234	0.102091	0.123082	0.0909832	0.0221063	0.114988	0.0983488	0.0540442	0.0522627	0.019767	0.0269175	0.0562484	0.0253281	0.0414546	0.0569262	0.0826855	0.094032	0.0760258	0.0682186	0.034311	0.0412363
69308	1700007P06Rik	No_BS	No_BS	No_BS	0.209827	0.143731	0.328914	0.265481	0.102029	0.738043	0.181856	0.176743	0.402213	0.294867	0.108023	0.208924	0.11853	0	0.112428	0.253127	0.207147	0.284458	0.227491	0.368518	0.253604	0.203938	0.0769862	0.248244
67769	Gpatch2	No_BS	No_BS	No_BS	6.27126	5.30474	4.76054	7.28692	6.00837	4.46199	5.89753	5.44394	4.18936	6.70395	5.25716	4.4035	5.84716	4.46784	3.95622	6.42968	5.41165	3.64364	5.44551	5.91909	5.17694	5.45487	4.75707	5.16166
26381	Esrrg	No_BS	No_BS	No_BS	0.012379	0.00706634	0	0.0167812	0	0.0362849	0	0.019551	0.0338988	0.00724838	0.00796619	0.0077036	0.0349643	0	0.0497466	0.0448008	0.0183314	0.0503461	0.00648179	0.0176887	0.0178166	0.00763939	0.028237	0.0378261
320272	9330162B11Rik	No_BS	No_BS	No_BS	0	0	0	0	0	0	0	0	0	0	0	0	0	0	0	0	0	0	0	0	0	0	0	0
22283	Ush2a	chr1-158 (+419223)	Merged-chr1-188681993-2 (+418959)	Merged-chr1-188682292-2 (+419258)	0.00217367	0	0	0.00785776	0.00264238	0	0.00235489	0.00228868	0	0.00254553	0.00279762	0	0.0020465	0.00278679	0.00582344	0.00262224	0	0	0.000724558	0.00350005	0.00154786	0.00178105	0.00355224	0.000874079
226823	Kctd3	chr1-135 (-57181), chr1-158 (+325583)	Merged-chr1-189142746-2 (-134906), Merged-chr1-188681993-2 (+325847)	Merged-chr1-189142739-2 (-134899), Merged-chr1-188682292-2 (+325548)	34.724	36.289	21.3701	30.5387	31.1796	20.5176	38.8416	39.4878	23.6763	30.7468	30.9707	26.4557	40.6921	35.3589	29.4602	27.2289	29.7964	21.2298	30.7944	27.412	34.0019	29.391	35.1704	26.085
16526	Kcnk2	chr1-191 (-338770), chr1-135 (+278332)	Merged-chr1-189142746-2 (+200607)	Merged-chr1-189142739-2 (+200614)	0.125652	0.0860712	0.164138	0.151409	0.0712814	0.19643	0.136127	0.14994	0.275268	0.166767	0.215626	0.145963	0.16562	0.139615	0.269305	0.22232	0.140587	0.204413	0.125287	0.139707	0.187112	0.176119	0.191513	0.189106
108000	Cenpf	chr1-191 (+5963)	No_BS	No_BS	20.8275	11.5539	17.6416	27.4187	13.9219	23.9297	18.7723	14.4943	17.7174	24.7942	12.8694	16.8087	18.6762	8.17746	14.4966	23.6082	14.0377	16.9025	16.6743	21.7568	16.9947	18.1574	13.7834	18.1828
19250	Ptpn14	chr1-136 (+33704), chr1-159 (+102527), chr1-101 (+154868)	Merged-chr1-189830984-1 (+102716), Merged-chr1-189883101-1 (+154833)	Merged-chr1-189747665-2 (+19397)	4.51006	3.24793	2.28855	4.09627	3.15354	1.85622	3.93531	9.04384	3.27465	5.79359	7.18238	3.4248	5.18743	7.93763	5.08976	6.4723	9.9871	3.4515	3.34885	3.03535	5.41793	5.46693	6.07161	6.63697
226830	Smyd2	chr1-59 (-239148), chr1-2 (-68925), chr1-101 (+39227), chr1-159 (+91568), chr1-136 (+160391)	Merged-chr1-190169031-2 (-246668), Merged-chr1-190168517-2 (-246154), Merged-chr1-190161521-2 (-239158), Merged-chr1-189991248-2 (-68885), Merged-chr1-189883101-1 (+39262), Merged-chr1-189830984-1 (+91379)	Merged-chr1-190168495-2 (-246132), Merged-chr1-190161537-2 (-239174), Merged-chr1-189991265-2 (-68902), Merged-chr1-189747665-2 (+174698)	28.6198	27.6626	25.3549	25.6122	27.5974	22.2654	31.6586	25.4441	22.952	24.9732	22.6827	22.4438	28.6877	23.8639	23.2331	27.1534	21.3288	25.6718	27.2124	25.1583	26.6849	23.3666	25.2616	24.718
19130	Prox1	chr1-4 (-277769), chr1-59 (+9169), chr1-2 (+179392)	Merged-chr1-190635055-2 (-464375), Merged-chr1-190448430-2 (-277750), Merged-chr1-190169031-2 (+1649), Merged-chr1-190168517-2 (+2163), Merged-chr1-190161521-2 (+9159), Merged-chr1-189991248-2 (+179432)	Merged-chr1-190448419-2 (-277739), Merged-chr1-190168495-2 (+2185), Merged-chr1-190161537-2 (+9143), Merged-chr1-189991265-2 (+179415)	0.0584391	0.0476555	0.0109055	1.37316	0.558173	0.171294	0.117578	0.167013	0	2.65925	1.26789	0.654611	0.0785999	0.139142	0.0335492	7.65414	4.35992	1.09783	0.039	0.700876	0.0948636	1.52725	0.0837637	4.37063
320119	Rps6kc1	chr1-4 (+463321)	Merged-chr1-190635055-2 (+276715), Merged-chr1-190448430-2 (+463340)	Merged-chr1-190448419-2 (+463351)	6.83834	5.44818	5.14966	5.89101	5.16008	4.49792	6.37819	5.34323	4.08376	5.69989	5.2852	4.30399	6.39754	4.93224	4.44693	5.53791	4.88189	3.31679	5.81206	5.183	5.26839	5.09636	5.2589	4.57886
52477	Angel2	No_BS	No_BS	No_BS	16.6036	18.2022	19.7088	17.2515	17.2878	19.9507	17.7643	15.2561	20.1073	16.6542	16.3258	17.6103	16.4768	14.8744	17.6686	15.8373	14.7422	17.0426	18.1715	18.1634	17.7092	16.8634	16.3399	15.8741
226841	Vash2	No_BS	No_BS	No_BS	2.07719	1.06339	1.03368	2.4434	1.46295	0.990604	2.22358	2.40408	2.0315	2.40359	2.32335	1.68251	2.54547	2.40947	2.68311	3.27152	3.23875	3.15126	1.39142	1.63232	2.21972	2.13648	2.54602	3.22051
226844	Mfsd7b	No_BS	No_BS	No_BS	2.83094	2.42158	3.45518	2.35224	2.034	2.84855	2.88385	2.95404	3.12405	2.6423	2.65381	2.94497	2.83239	2.5352	3.48652	2.58939	2.66965	3.28795	2.90257	2.4116	2.98731	2.74703	2.95137	2.849
100125339	A230020J21Rik	No_BS	No_BS	No_BS	0.041889	0.0956463	0.0820789	0.0189284	0.0509215	0	0.113453	0.0220527	0	0.0245276	0.0808696	0.0782039	0.0788763	0.0805566	0.084168	0.0505333	0.103385	0.0851822	0.0732047	0.0232833	0.0451686	0.0612004	0.0812003	0.0797002
75558	Spata45	No_BS	No_BS	No_BS	1.85599	0.644886	1.37035	1.16684	0.882857	0.591325	2.53525	1.69929	2.43073	1.323	0.934725	1.60696	1.7474	0.931107	2.81045	1.94695	0.716981	1.96914	1.29041	0.880341	2.22176	1.28823	1.82965	1.54436
68972	Tatdn3	No_BS	No_BS	No_BS	5.04016	7.82944	8.09498	4.35588	6.36132	7.46748	6.29582	7.77176	9.23904	6.12818	6.13244	6.5816	6.81971	9.71037	8.78063	6.47896	7.36852	8.8491	6.98819	6.06156	7.76887	6.28074	8.4369	7.56553
381318	Nsl1	No_BS	No_BS	No_BS	10.7574	13.6606	14.7959	12.3151	12.3144	14.3016	13.5672	12.9534	15.3494	13.6452	12.4248	15.5577	12.9608	13.4789	14.4099	14.3367	13.5904	14.7096	13.0713	12.977	13.9567	13.8759	13.6165	14.2122
381319	Batf3	No_BS	No_BS	No_BS	0.727616	0.498415	0.697017	0.87677	0.294837	0.497643	0.945931	0.919337	0.929836	0.511255	0.499453	0.48299	0.867723	0.68409	1.03965	1.11184	0.8141	0.986415	0.641016	0.556417	0.931701	0.497899	0.86382	0.970785
619288	Fam71a	No_BS	No_BS	No_BS	0	0	0	0	0	0	0	0	0	0	0	0	0	0	0	0	0	0	0	0	0	0	0	0
11910	Atf3	No_BS	Merged-chr1-191269036-2 (-85696)	Merged-chr1-191268978-2 (-85638)	1.99255	2.89341	0.593632	1.01095	1.63604	0.46109	2.84035	6.55157	1.19658	1.55561	5.129	1.0442	3.38991	8.94101	1.45161	1.5814	5.98758	0.592382	1.82653	1.03603	3.5295	2.57627	4.59418	2.72045
66208	Nenf	No_BS	Merged-chr1-191269036-2 (+49158)	Merged-chr1-191268978-2 (+49216)	18.8959	14.262	20.1582	16.5078	16.4621	29.3858	23.5988	17.2982	35.2151	21.8826	17.8346	26.1967	24.5111	20.4573	36.6318	21.9721	22.0228	41.485	17.772	20.7852	25.3707	21.9713	27.2001	28.4933
66950	Tmem206	No_BS	No_BS	No_BS	1.74166	1.6226	1.12683	1.52947	1.50802	0.866902	1.74446	1.92032	1.32733	1.67402	1.8821	1.04295	2.01103	1.68523	1.67273	1.36768	1.58154	0.957821	1.49703	1.30146	1.66403	1.53303	1.78966	1.30235
226849	Ppp2r5a	chr1-69 (-38595)	Merged-chr1-191435603-1 (-38562), Merged-chr1-191396455-1 (+586)	No_BS	36.5882	35.5921	37.826	25.7543	23.5125	31.1719	32.5121	26.2648	34.6304	26.3778	24.9516	28.7039	28.2438	23.1741	35.5013	20.6701	21.8385	24.1705	36.6688	26.8129	31.1358	26.6778	28.9731	22.2264
76843	Dtl	chr1-69 (+139898)	Merged-chr1-191435603-1 (+139931)	No_BS	26.1894	28.1194	31.9514	25.6647	27.1178	32.4556	29.5868	23.0519	34.7355	31.5541	26.6102	37.4675	27.9523	26.7467	26.4989	31.2706	27.9474	31.4751	28.7534	28.4127	29.1248	31.8773	27.066	30.231
77065	Ints7	No_BS	No_BS	No_BS	14.2825	13.0402	13.5879	15.0609	13.2571	11.6962	15.4172	13.5765	12.4565	17.3156	14.6177	15.1002	15.1915	12.6737	12.178	17.0195	14.916	12.9112	13.6369	13.3381	13.8167	15.6778	13.3477	14.9489
226856	Lpgat1	No_BS	No_BS	No_BS	7.50981	5.33135	4.91745	7.85923	5.60723	4.32287	6.93306	6.78831	5.31085	8.76664	7.74587	5.1301	7.81964	6.95224	4.97239	13.9457	11.8218	8.17186	5.91953	5.92978	6.34408	7.2142	6.58142	11.3131
18005	Nek2	No_BS	No_BS	No_BS	32.0528	33.4484	33.3043	33.7417	33.2647	30.6998	33.8004	31.2804	27.7343	32.9691	27.7525	32.0547	34.6018	27.7421	26.3231	33.7149	29.2651	28.2806	32.9352	32.5687	30.9384	30.9254	29.5557	30.4202
98736	1700034H15Rik	No_BS	No_BS	No_BS	0.142521	0.18079	0.17583	0.228981	0.154002	0.13925	0.137247	0.116714	0.151775	0.185447	0.122287	0.0985467	0.141637	0.0609069	0.106062	0.152828	0.11725	0.128808	0.16638	0.174078	0.135245	0.135427	0.102869	0.132962
22782	Slc30a1	No_BS	No_BS	No_BS	7.06599	8.90384	10.274	7.22136	7.75473	9.717	7.41898	6.79321	7.94777	7.54012	7.39439	8.51503	7.69709	6.70539	7.23599	9.28892	7.53642	9.29275	8.74795	8.23103	7.38665	7.81651	7.21282	8.70603
74023	Rd3	No_BS	No_BS	No_BS	0.0728468	0.0739258	0.0845859	0.0512048	0.049197	0.0949003	0.0526133	0.00852236	0.155154	0.0284363	0.0520874	0.0805926	0.0457231	0.0207543	0.0433694	0.048822	0.0559351	0.0877841	0.0771195	0.0651007	0.0720966	0.0537054	0.0366156	0.0641804
22033	Traf5	No_BS	No_BS	No_BS	0.605634	0.523244	0.32073	0.591716	0.636735	0.383829	0.443327	0.465333	0.448235	0.287531	0.547742	0.366706	0.354448	0.524636	0.241188	0.473911	0.420145	0.310666	0.483203	0.537427	0.452298	0.400659	0.373424	0.401574
100628582	Mir3473c	No_BS	No_BS	No_BS	0	0	0	0	0	0	0	0	0	0	0	0	0	0	0	0	0	0	0	0	0	0	0	0
214742	Rcor3	No_BS	No_BS	No_BS	1.18798	1.1689	1.15368	1.38442	0.912092	1.14545	1.21929	1.28376	1.7443	1.50105	1.47869	1.55641	1.22149	1.1924	1.62276	1.55571	1.55089	1.56814	1.17019	1.14732	1.41578	1.51205	1.34555	1.55825
100038712	Gm10516	No_BS	No_BS	No_BS	0.0661131	0.0603831	0.0690904	0.0597492	0	0.096894	0.0429749	0.0417667	0	0	0.0170181	0.0658286	0.037347	0.0169523	0.0708489	0.0957076	0.0261075	0.0717027	0.0651955	0.0522144	0.0282472	0.0276156	0.041716	0.0645059
16510	Kcnh1	chr1-77 (+264443)	Merged-chr1-192455212-2 (+264428), Merged-chr1-192745605-1 (+554821)	No_BS	0.23378	0.0980444	0.162041	0.668326	0.463984	0.349616	0.258439	0.160751	0.169845	0.575485	0.282465	0.504741	0.3324	0.146802	0.274812	0.615848	0.131883	0.245784	0.164622	0.493975	0.196345	0.45423	0.251338	0.331172
226861	Hhat	chr1-77 (+315986)	Merged-chr1-192745605-1 (+25608), Merged-chr1-192455212-2 (+316001)	No_BS	0.426389	0.417251	0.318279	0.297267	0.399855	0.482071	0.448738	0.359159	0.300246	0.285333	0.360628	0.363903	0.389972	0.421708	0.342699	0.617255	0.348782	0.247735	0.387306	0.393064	0.369381	0.336622	0.384793	0.40459
73455	1700065J18Rik	No_BS	No_BS	No_BS	0	0	0	0	0	0	0	0	0	0	0	0	0	0	0	0	0	0	0	0	0	0	0	0
214791	Sertad4	No_BS	No_BS	No_BS	1.6959	1.79702	1.26022	3.79952	2.51834	1.8455	1.41922	1.5504	1.43215	4.00773	4.9797	2.91967	2.08429	1.45818	1.75481	3.83448	2.75699	2.43677	1.58438	2.72112	1.46726	3.96903	1.76576	3.00941
100503471	Gm15867	No_BS	No_BS	No_BS	0.243712	0.516726	0.318359	0.188788	0.296263	0.306154	0.226312	0.329923	0.333691	0.366949	0.313669	0.389995	0.426127	0.491	0.839474	0.504008	0.206228	0.424795	0.359599	0.263735	0.296642	0.356871	0.585534	0.378344
329324	Syt14	chr1-78 (-423)	Merged-chr1-193036113-1 (-415)	Merged-chr1-193036109-1 (-411)	2.28423	2.16076	2.66559	3.01592	2.50174	2.79295	2.31439	2.61582	2.26376	3.26604	2.45272	2.61014	2.16287	2.00813	1.96993	3.15451	2.56861	2.40067	2.37019	2.7702	2.39799	2.7763	2.04698	2.70793
215193	Diexf	No_BS	No_BS	No_BS	8.03675	9.0047	7.75787	7.79762	9.14159	6.56895	7.25676	8.10803	6.19664	7.77863	8.38871	6.67881	7.1973	7.73371	6.24585	6.63121	7.68829	5.75568	8.26644	7.83606	7.18714	7.61538	7.05895	6.69172
54139	Irf6	No_BS	No_BS	No_BS	3.50902	2.86835	2.61463	2.02839	1.95467	1.6447	2.64023	2.60127	3.46295	1.7065	1.89705	2.53289	2.78332	2.69498	3.62352	1.97008	2.74491	2.78161	2.99733	1.87592	2.90148	2.04548	3.03394	2.49887
319266	A130010J15Rik	No_BS	No_BS	No_BS	3.26097	3.46583	2.96537	2.9308	3.35089	2.83848	3.39621	3.15845	3.41653	3.37577	2.97965	2.52266	3.39246	3.75346	3.19772	3.52096	2.98811	3.1874	3.23072	3.04006	3.32373	2.95936	3.44788	3.23216
215243	Traf3ip3	No_BS	No_BS	No_BS	0.0162836	0	0.0212711	0	0	0.0238649	0	0	0	0	0	0.0202669	0.0153309	0	0	0.157151	0.0321513	0.0441507	0.0125182	0.00795496	0	0.00675563	0.00511029	0.0778177
15483	Hsd11b1	No_BS	No_BS	No_BS	0	0.0272873	0	0	0.0871655	0.0350294	0	0.100664	0.0327258	0	0.153811	0.0297482	0	0.0306431	0	0.0288337	0.117981	0	0.00909578	0.0407316	0.0444633	0.0611864	0.0102144	0.0489381
14373	G0s2	No_BS	No_BS	No_BS	0.860364	0.654831	0.267592	1.51807	0.796863	1.20089	0.355083	0.474512	0.504863	1.63127	1.84555	1.47876	0.655736	0.420207	0.384164	0.790789	0.404465	0.833129	0.594263	1.17194	0.444819	1.65186	0.486702	0.676128
16780	Lamb3	chr1-267 (-1391)	No_BS	No_BS	1.05338	0.615505	0.877617	0.614665	0.79654	0.790138	0.386389	0.68992	1.02209	0.437096	0.512407	0.56778	0.695003	0.765636	0.988839	0.690409	0.85978	0.843333	0.848833	0.733781	0.699467	0.505761	0.816493	0.797841
215303	Camk1g	chr1-192 (-852909)	No_BS	Merged-chr1-194032766-2 (-662469)	0	0.0160743	0.110353	0.0763465	0.0171157	0.144444	0.0457605	0.0592986	0.0385559	0.0494651	0.126849	0.0525717	0.0397678	0.0361022	0.0377206	0.118896	0.0833993	0.0190876	0.0421425	0.0793022	0.0478717	0.0762951	0.0378635	0.0737944
387201	Mir205	No_BS	No_BS	No_BS	0	0	0	0	0	0	0	0	0	0	0	0	0	0	0	0	0	0	0	0	0	0	0	0
74942	4930503O07Rik	No_BS	No_BS	No_BS	0	0	0	0	0	0	0	0	0	0	0	0	0	0	0	0	0	0	0	0	0	0	0	0
18845	Plxna2	chr1-192 (-396623), chr1-90 (+127235)	Merged-chr1-194619907-1 (+78), Merged-chr1-194620585-2 (+756)	Merged-chr1-194032766-2 (-587063)	0.654131	0.325161	0.204422	1.07202	0.460367	0.422003	0.498439	0.349314	0.24855	1.17288	0.567978	0.40902	0.601126	0.204644	0.230588	1.82743	0.506734	0.551594	0.394571	0.651463	0.365434	0.716626	0.345452	0.96192
12490	Cd34	chr1-90 (-191757)	No_BS	No_BS	1.7921	2.15129	2.04838	1.79823	2.40279	2.54922	2.79805	2.15054	3.30174	2.45361	2.0182	1.90247	2.779	2.19623	2.5065	3.21109	2.13347	3.55496	1.99726	2.25008	2.75011	2.12476	2.49391	2.9665
320400	Gm16897	No_BS	No_BS	No_BS	0	0	0.0181116	0.0501212	0.0168546	0	0	0	0.0189839	0	0.0535343	0	0.0391611	0	0	0.0167261	0.0136878	0.0187964	0.0060372	0.0223253	0.00632795	0.0178448	0.0130537	0.0164034
320977	A330023F24Rik	No_BS	No_BS	No_BS	0.0132964	0.00759003	0.034738	0.0420579	0.0404088	0.0487175	0.0144049	0.014	0.072822	0.0233567	0.0256697	0.033098	0.0375555	0.00852344	0.0267166	0.0320806	0.0328166	0.0630901	0.0185415	0.0437281	0.0337423	0.0273748	0.0242652	0.0426624
723963	Mir29b-2	No_BS	No_BS	No_BS	0	0	0	0	0	0	0	0	0	0	0	0	0	0	0	0	0	0	0	0	0	0	0	0
387224	Mir29c	No_BS	No_BS	No_BS	0	0	0	0	0	0	0	0	0	0	0	0	0	0	0	0	0	0	0	0	0	0	0	0
17221	Cd46	No_BS	No_BS	No_BS	0.0284728	0.0325063	0.111581	0.0771962	0.0692246	0.0417291	0.123386	0	0.038985	0.200062	0.0732916	0.106314	0.0268069	0	0.114421	0.068697	0.0562183	0.0386	0.0575201	0.0627167	0.0541237	0.126556	0.0470761	0.0545051
12946	Cr1l	No_BS	No_BS	No_BS	13.2581	20.5217	25.5169	13.5219	19.6282	27.6843	14.2283	18.7513	23.4452	16.1102	20.3802	20.3292	15.5149	27.921	19.4299	15.1668	18.8741	22.8757	19.7656	20.2781	18.8083	18.9399	20.9553	18.9722
12902	Cr2	No_BS	No_BS	No_BS	0.0333857	0.0190576	0.0290743	0.0201147	0.0473487	0.0326196	0.0180845	0.0175761	0.0761862	0.0130324	0.0716149	0.0623288	0.0314324	0.0285351	0.0372679	0.0872629	0.0439458	0.0301736	0.0271725	0.033361	0.0372823	0.048992	0.0324118	0.0537941
619314	B020014A21Rik	No_BS	No_BS	No_BS	0.0712848	0.162767	0.116398	0.161058	0.0866558	0.104474	0.0579208	0.0375283	0.0976033	0.0834798	0.0229367	0.0443613	0.0503356	0.0913917	0.0238722	0.128993	0.0351872	0.120799	0.116817	0.117396	0.0643508	0.0502593	0.0551998	0.0949932
670558	H60c	No_BS	No_BS	No_BS	0.0490415	0.0139972	0.0640625	0.0110802	0.0149041	0.107811	0.0398475	0.0387273	0.100722	0.0861469	0.0157797	0.0762976	0.0923444	0.0157186	0.0821163	0.0591618	0.0363114	0.116348	0.0423671	0.0445986	0.0597655	0.0594081	0.0633931	0.0706071
76142	Ppp1r14c	No_BS	No_BS	No_BS	0.561029	0.343686	0.321747	0.469926	0.332684	0.501361	0.459557	0.48986	0.29977	0.576884	0.545956	0.510928	0.502438	0.473669	0.531563	0.264119	0.432284	0.667823	0.408821	0.434657	0.416396	0.544589	0.502557	0.454742
70337	Iyd	No_BS	No_BS	No_BS	0	0	0	0	0	0.0328685	0.0242966	0	0	0.0262636	0	0	0	0	0	0	0	0	0	0.0109562	0.00809888	0.00875454	0	0
213783	Plekhg1	chr10-36 (+200778), chr10-116 (+201253)	Merged-chr10-3941149-2 (+200785), Merged-chr10-3941618-1 (+201254)	No_BS	2.88822	2.04756	3.70592	4.61838	3.26183	4.12368	2.1903	2.24154	3.00418	6.30638	4.71254	5.87334	2.57011	1.69019	2.31509	2.56822	1.98673	1.71777	2.88056	4.00129	2.47867	5.63075	2.1918	2.09091
270685	Mthfd1l	chr10-36 (-31989), chr10-116 (-31514)	Merged-chr10-3941149-2 (-31982), Merged-chr10-3941618-1 (-31513)	No_BS	30.878	31.2201	31.4521	32.4091	33.2525	31.8053	34.0915	34.6104	32.5301	39.1669	43.7946	45.3081	34.2582	35.7137	27.7351	27.2667	33.0732	27.3019	31.1834	32.4889	33.744	42.7565	32.569	29.214
83397	Akap12	No_BS	Merged-chr10-4370340-2 (+104011)	Merged-chr10-4301707-2 (+35378)	100.843	64.6903	66.8182	92.5847	72.4837	55.8518	103.901	100.526	74.5554	106.466	82.399	81.3481	113.317	72.3552	63.3496	77.667	79.2836	43.8163	77.4504	73.6401	92.9941	90.0711	83.0072	66.9223
381990	Zbtb2	chr10-50 (+969)	Merged-chr10-4387177-2 (+931), Merged-chr10-4370340-2 (+17768)	Merged-chr10-4301707-2 (+86401)	5.85436	9.04194	8.84984	6.25808	6.98661	8.3918	7.40916	7.49385	6.2573	7.39483	9.13271	8.27219	7.42636	8.38384	6.9246	6.41691	6.91015	6.38414	7.91538	7.21216	7.05344	8.26658	7.57826	6.5704
66084	Rmnd1	No_BS	No_BS	No_BS	0.074716	0.0213251	0	0.050643	0.0227067	0	0.080945	0.0393347	0.0255753	0.043749	0.0240408	0	0.0527584	0.0478954	0	0	0.0184405	0	0.0320137	0.0244499	0.0486183	0.0225966	0.0335513	0.00614682
433224	Gm5512	No_BS	No_BS	No_BS	0.246485	0.270147	0.270464	0.338594	0.215737	0.245646	0.256353	0.280289	0.364487	0.323291	0.241101	0.220882	0.287759	0.151685	0.264141	0.261668	0.253071	0.307423	0.262365	0.266659	0.300376	0.261758	0.234528	0.274054
73419	Armt1	No_BS	No_BS	No_BS	17.0425	21.2303	17.8691	18.3598	19.819	19.0092	17.3032	17.6902	18.5025	15.7722	19.8769	18.3958	18.4167	22.275	19.334	15.6106	20.0558	19.8124	18.714	19.0627	17.832	18.015	20.0086	18.4929
100504234	Ccdc170	No_BS	No_BS	No_BS	0.176621	0.183311	0.0838978	0.246686	0.195187	0.188256	0.226136	0.135248	0.0879382	0.16923	0.165323	0.219827	0.181405	0.22644	0.279608	0.135589	0.190217	0.0870699	0.147943	0.210043	0.149774	0.184793	0.229151	0.137625
13982	Esr1	No_BS	Merged-chr10-4712756-1 (+100767)	No_BS	0.0157615	0.0044986	0.00514729	0.0213666	0.00958009	0.0115499	0.00426889	0.00829775	0.0161856	0	0.0101429	0	0.00370984	0.0101037	0.0052783	0	0.0155603	0	0.00846914	0.0141655	0.00958406	0.00338097	0.00636394	0.00518675
64009	Syne1	chr10-85 (+130918)	Merged-chr10-4712756-1 (+356307)	No_BS	0.246002	0.156754	0.174376	0.384324	0.250365	0.217998	0.202465	0.39957	0.195829	0.42208	0.365703	0.230228	0.226222	0.293386	0.166042	0.437099	0.483837	0.206822	0.192377	0.284229	0.265955	0.339337	0.22855	0.375919
68632	Myct1	No_BS	No_BS	No_BS	0.012428	0.0141886	0	0	0.0151079	0	0	0	0	0	0	0	0	0	0	0	0	0	0.00887222	0.00503595	0	0	0	0
22353	Vip	No_BS	No_BS	No_BS	0	0	0	0	0	0	0	0	0	0	0	0	0	0	0.0302975	0.0272853	0	0	0	0	0	0	0.0100992	0.00909511
67141	Fbxo5	No_BS	No_BS	No_BS	52.7523	59.6799	80.9192	55.2575	57.4821	85.7723	62.2855	49.486	84.476	60.322	60.933	86.7096	57.5477	58.3203	73.6594	60.687	51.6258	93.4105	64.4505	66.1707	65.4158	69.3216	63.1758	68.5744
108853	Mtrf1l	No_BS	No_BS	No_BS	1.98976	1.97076	2.77134	1.94114	1.93825	3.3024	1.61316	1.38744	2.39962	1.4197	1.42461	1.91888	1.74928	1.87524	2.66536	1.7963	1.48302	2.71535	2.24395	2.39393	1.80008	1.58773	2.09663	1.99822
56533	Rgs17	chr10-99 (-83628)	Merged-chr10-5922434-1 (-34)	No_BS	0.160247	0.0818453	0.104665	0.323944	0.21018	0.247216	0.127921	0.057722	0.242507	0.266677	0.15197	0.320165	0.182634	0.113537	0.293742	0.234014	0.162364	0.217244	0.115586	0.260447	0.142716	0.246271	0.196637	0.204541
18390	Oprm1	No_BS	No_BS	No_BS	0	0.00857178	0	0	0	0	0	0	0	0	0	0.0093448	0	0	0	0	0	0	0.00285726	0	0	0.00311493	0	0
320495	Ipcef1	chr10-117 (-169633), chr10-100 (-152823)	Merged-chr10-7149988-2 (-169612), Merged-chr10-7133254-2 (-152878)	Merged-chr10-7149883-2 (-169507), Merged-chr10-7133233-2 (-152857)	0.00419144	0	0	0.00378799	0	0.00614289	0.00454088	0	0.00573893	0.00490849	0	0.00521676	0	0	0.0112292	0.0101128	0.00413791	0.00568226	0.00139715	0.00331029	0.0034266	0.00337508	0.00374307	0.00664432
215748	Cnksr3	chr10-117 (+62228), chr10-100 (+79038)	Merged-chr10-7211904-2 (+333), Merged-chr10-7149988-2 (+62249), Merged-chr10-7133254-2 (+78983)	Merged-chr10-7149883-2 (+62354), Merged-chr10-7133233-2 (+79004)	5.38897	3.45357	2.34216	6.81653	4.55403	2.77456	4.70966	4.61944	2.60582	6.38127	7.16791	4.31357	4.71531	5.16249	3.73013	4.76099	4.96415	3.20474	3.72823	4.71504	3.97831	5.95425	4.53598	4.30996
77777	Ulbp1	chr10-76 (-108998)	Merged-chr10-7582424-2 (-108947)	No_BS	2.99996	1.88589	1.04171	3.51768	2.76975	2.17051	2.30384	2.11912	1.50783	3.75776	2.61479	2.15049	2.82444	3.01849	0.915622	2.72573	2.69922	0.978136	1.97585	2.81931	1.97693	2.84101	2.25285	2.13436
237253	Lrp11	chr10-76 (-7342), chr10-32 (+27917), chr10-145 (+30068), chr10-86 (+38731)	Merged-chr10-7582424-2 (-7393), Merged-chr10-7589814-1 (-3)	No_BS	16.6943	13.3485	11.6343	18.7535	14.2874	15.5116	15.8391	13.8309	15.6887	17.5262	17.8093	16.9059	15.1049	13.6084	18.8353	14.6814	14.845	17.1188	13.8923	16.1842	15.1195	17.4138	15.8495	15.5484
18537	Pcmt1	chr10-86 (+34755), chr10-145 (+43418), chr10-32 (+45569)	No_BS	No_BS	14.8275	21.2886	23.064	19.4084	23.9819	24.9523	16.903	17.4901	20.7212	18.5456	21.4953	23.2085	17.7256	23.1906	20.6102	19.4957	23.8159	26.525	19.7267	22.7808	18.3714	21.0831	20.5088	23.2789
320642	A630066F11Rik	No_BS	No_BS	No_BS	0.771787	0.69231	1.00818	0.647676	0.804177	0.80794	0.806269	0.493378	0.754809	0.419631	0.461187	0.651824	0.544974	0.353386	0.812303	0.565283	0.680296	1.08367	0.824092	0.753264	0.684819	0.510881	0.570221	0.776415
69912	Nup43	No_BS	No_BS	No_BS	67.2008	91.7287	135.873	67.9669	78.6644	135.529	80.8088	73.0962	132.445	66.1558	75.4639	112.63	79.2502	83.2725	127.245	58.2014	68.7215	120.321	98.2674	94.0535	95.4501	84.75	96.5892	82.4147
407824	BC020402	No_BS	No_BS	No_BS	0.378839	0.252296	0.701072	0.413701	0.42215	0.532085	0.256514	0.382263	0.324192	0.554561	0.264108	0.432218	0.267505	0.283323	0.528614	0.380847	0.311667	0.577783	0.444069	0.455978	0.32099	0.416962	0.359814	0.423433
16798	Lats1	No_BS	No_BS	No_BS	3.88218	4.04412	3.91443	4.91448	4.38759	3.60601	3.59907	4.79825	3.60483	5.16296	5.28611	4.17051	3.90291	3.81729	3.18047	5.23191	5.21252	3.82881	3.94691	4.30269	4.00072	4.87319	3.63356	4.75775
23924	Katna1	No_BS	No_BS	No_BS	26.4431	33.4324	28.6455	26.4299	30.0161	23.6975	26.4974	27.1661	21.7662	27.9818	29.0499	24.4839	26.0684	31.457	21.5031	24.412	26.9122	28.014	29.507	26.7145	25.1432	27.1719	26.3428	26.446
215751	Ginm1	No_BS	No_BS	No_BS	7.09826	8.02786	13.1262	7.77819	9.32994	15.5071	7.81019	8.66498	14.8518	9.50753	11.2484	13.2796	9.43968	9.83984	13.906	9.79401	10.4895	17.5619	9.41745	10.8717	10.4423	11.3452	11.0619	12.6152
67418	Ppil4	No_BS	No_BS	No_BS	19.9879	23.2415	31.8118	20.532	18.9482	24.2251	22.0935	19.4507	25.6202	23.1838	19.9693	22.443	22.3104	20.5495	24.2984	20.4007	16.8245	23.2977	25.0137	21.2351	22.3881	21.8654	22.3861	20.1743
237256	Zc3h12d	No_BS	No_BS	No_BS	0	0	0.0220455	0.0228778	0.0307731	0.0494673	0.027425	0.0177693	0.0115536	0.0197635	0.0217207	0.0105023	0.0476669	0.0108183	0	0.0305385	0.00833042	0.022879	0.00734849	0.0343727	0.018916	0.0173288	0.0194951	0.0205826
100628581	Mir5104	No_BS	No_BS	No_BS	0	0	0	0	0	0	0	0	0	0	0	0	0	0	0	0	0	0	0	0	0	0	0	0
68652	Tab2	chr10-5 (-331245)	Merged-chr10-8287475-2 (-331245), Merged-chr10-7956644-2 (-414)	Merged-chr10-8297443-2 (-341213), Merged-chr10-8287522-2 (-331292)	18.9722	16.9224	18.3923	21.7499	17.4495	18.103	17.7026	17.1029	15.0665	22.7473	21.3009	19.1217	18.1206	13.7972	14.8483	21.8452	18.6821	16.3406	18.0956	19.1008	16.624	21.0566	15.5887	18.956
338362	Ust	chr10-5 (+231350)	Merged-chr10-8287475-2 (+231350)	Merged-chr10-8297443-2 (+221382), Merged-chr10-8287522-2 (+231303)	0.741701	0.478611	0.368595	1.38433	0.862432	0.768005	0.952016	1.06107	0.574	0.859146	1.06874	0.511739	1.00951	1.08528	0.583164	1.61446	1.13814	0.797851	0.529636	1.00492	0.862361	0.813209	0.892649	1.18348
70097	Sash1	No_BS	No_BS	No_BS	6.08721	5.33019	4.15799	6.45292	5.35988	3.69254	7.67819	7.01681	5.47083	8.88539	6.39882	6.80429	8.27066	6.05966	6.20894	9.28074	6.97783	5.46244	5.19179	5.16845	6.72194	7.36283	6.84642	7.24033
320825	Samd5	chr10-13 (-120566)	Merged-chr10-9795765-2 (-120557)	No_BS	0.152269	0.0474111	0.108495	0.0250204	0.0504826	0.0405751	0.134971	0.116601	0.151627	0.081054	0.0178162	0.0516867	0.299754	0.106483	0.185428	0.0667971	0.109327	0.0938313	0.102725	0.0386927	0.1344	0.0501856	0.197222	0.0899852
620417	Gm6150	No_BS	No_BS	No_BS	0	0	0	0	0	0	0	0	0	0	0	0	0	0	0	0	0	0	0	0	0	0	0	0
78808	Stxbp5	chr10-13 (+105305)	Merged-chr10-9901207-2 (-128), Merged-chr10-9795765-2 (+105314)	No_BS	0.696535	0.521448	0.333125	0.99755	0.559858	0.368167	0.581417	0.929761	0.469031	0.775578	0.969954	0.596897	0.623531	0.556297	0.402786	0.895373	0.864247	0.516	0.517036	0.641859	0.66007	0.78081	0.527538	0.75854
215772	Adgb	chr10-29 (-28338)	Merged-chr10-10458170-2 (-28331)	No_BS	0.00661891	0.00755657	0.00864623	0.0119636	0.00804614	0.00970054	0.00717072	0.00696912	0	0	0.00851885	0	0	0	0	0	0.0196032	0	0.00760724	0.00990342	0.00471328	0.00283962	0	0.00653438
67844	Rab32	chr10-29 (+100056)	Merged-chr10-10458170-2 (+100063)	No_BS	0.706219	1.171	0.680914	0.547063	0.817619	0.59144	0.874395	1.22161	0.759752	0.728579	0.973861	0.648768	1.02901	1.44436	1.01358	0.831671	0.9628	0.661068	0.852712	0.652041	0.951917	0.783736	1.16232	0.818513
382450	Gm5177	No_BS	No_BS	No_BS	0.0821235	0.0312525	0.0953575	0.0907115	0.0776468	0.0936122	0.148283	0.0480382	0.0374812	0.074801	0.0469763	0.0340709	0.0859096	0.0701917	0.0488923	0.0660471	0.0540498	0.0247407	0.0695778	0.0873235	0.0779342	0.0519494	0.0683312	0.0482792
14816	Grm1	chr10-11 (+291642)	Merged-chr10-10790710-2 (+291646)	Merged-chr10-10790676-2 (+291680)	0	0.00564094	0.00645437	0	0	0	0.0107058	0	0.00676521	0.00578626	0.0127186	0	0.0093038	0.00633466	0.00661864	0.0119212	0	0	0.00403177	0	0.00582367	0.00616827	0.00741904	0.00397374
78056	4930567K20Rik	No_BS	No_BS	No_BS	0	0	0	0	0	0	0	0	0	0	0	0	0	0	0	0	0	0	0	0	0	0	0	0
268281	Shprh	No_BS	Merged-chr10-11263936-2 (+114506)	No_BS	5.3801	5.0089	5.37176	5.58803	4.66447	4.59366	4.69674	4.89746	4.88211	5.09874	4.7758	4.20652	5.03732	3.5084	4.34802	4.92943	4.59929	4.58188	5.25359	4.94872	4.82544	4.69369	4.29791	4.70353
71865	Fbxo30	No_BS	Merged-chr10-11263936-2 (-17394)	No_BS	12.6291	12.8298	18.0499	14.2882	11.2884	19.5086	12.9722	10.6165	19.9086	12.5039	10.3784	16.0378	13.5243	10.8577	19.8844	14.1354	12.4278	23.1912	14.503	15.0284	14.4991	12.9734	14.7555	16.5848
13853	Epm2a	No_BS	No_BS	No_BS	0.992272	0.877039	0.794443	1.15711	0.778216	1.2197	0.693547	0.84256	0.87653	1.01209	0.370771	1.19516	0.843809	0.656598	0.600279	0.92674	0.5372	0.737693	0.887918	1.05167	0.804212	0.859341	0.700228	0.733878
22288	Utrn	chr10-146 (+87824), chr10-101 (+701490)	No_BS	No_BS	12.2814	10.5629	9.34968	16.1762	14.2345	11.5649	12.9064	10.1294	10.4759	17.9789	10.3607	13.8623	13.241	7.32028	9.75952	14.052	9.00463	8.98849	10.7313	13.9919	11.1706	14.0673	10.1069	10.6817
320273	B230208H11Rik	No_BS	No_BS	No_BS	0.672049	0.366948	0.458031	0.60736	0.390721	0.385412	0.411522	0.523015	0.600112	0.752801	0.564103	0.40004	0.577709	0.636843	0.939377	0.422992	0.519235	0.633798	0.499009	0.461164	0.511549	0.572315	0.717976	0.525342
74732	Stx11	No_BS	No_BS	No_BS	0.461269	0.427874	0.357765	0.482004	0.49064	0.528145	0.51534	0.500852	0.453941	0.405135	0.352494	0.502342	0.624279	0.628337	0.540652	0.573846	0.626145	0.566708	0.415636	0.500263	0.490044	0.41999	0.597756	0.5889
66125	Sf3b5	No_BS	No_BS	No_BS	129.398	144.452	210.337	112.733	122.293	252.191	120.254	102.456	216.085	87.5043	93.6264	182.779	117.441	122.221	243.487	85.7135	92.8129	225.625	161.396	162.406	146.265	121.303	161.049	134.717
22634	Plagl1	No_BS	No_BS	No_BS	0.466102	0.494657	0.763225	0.474632	0.526705	0.654246	0.476512	0.497676	0.764027	0.645782	0.388664	0.531096	0.704602	0.277745	0.861795	0.982023	0.427744	1.07688	0.574661	0.551861	0.579405	0.521847	0.614714	0.828881
338438	Hymai	No_BS	No_BS	No_BS	0	0	0.00892326	0	0.00830394	0	0	0	0	0.0079996	0.0087918	0	0	0	0	0	0	0	0.00297442	0.00276798	0	0.00559713	0	0
75122	Zc2hc1b	No_BS	No_BS	No_BS	0.0327991	0.0374456	0	0	0	0	0	0	0	0	0	0	0	0	0	0	0	0	0.0234149	0	0	0	0	0
353258	Ltv1	No_BS	No_BS	No_BS	62.4527	87.0899	74.9977	62.9027	79.1963	67.8812	67.8498	65.8599	60.8495	59.3192	65.797	61.5372	70.2568	74.7338	53.6698	53.8248	58.7816	60.3546	74.8468	69.9934	64.8531	62.2178	66.2201	57.6537
215789	Phactr2	No_BS	No_BS	No_BS	0.650993	0.402575	0.359389	0.672377	0.565261	0.312348	0.621305	0.595678	0.39792	0.730596	0.613432	0.40512	0.609256	0.625961	0.430825	1.03309	0.811	0.54108	0.470986	0.516662	0.538301	0.583049	0.555347	0.795055
66848	Fuca2	No_BS	No_BS	No_BS	1.86925	1.84486	1.83705	1.92614	1.77326	1.86903	2.36576	2.69472	3.31285	1.91285	2.46202	2.73963	2.56582	3.75153	3.14747	2.95046	3.12162	3.37487	1.85039	1.85614	2.79111	2.3715	3.15494	3.14898
56535	Pex3	chr10-25 (-88803)	Merged-chr10-13641955-2 (-88816), Merged-chr10-13553330-2 (-191)	Merged-chr10-13641954-2 (-88815)	4.58106	5.91863	8.66678	4.77604	6.0053	8.4187	5.30526	5.30731	8.21901	5.28068	6.57991	7.64992	5.23243	7.25407	6.75209	5.85558	6.32308	8.41041	6.38882	6.40002	6.27719	6.5035	6.41286	6.86302
66757	Adat2	No_BS	Merged-chr10-13553330-2 (+436)	No_BS	7.93911	14.5998	12.9169	7.36824	11.6737	8.08207	9.63104	10.6116	9.40568	8.49003	10.6157	7.83986	9.10828	12.9516	8.21486	8.25839	9.38649	7.41158	11.8186	9.04133	9.88279	8.98187	10.0916	8.35215
66253	Aig1	chr10-147 (-3890), chr10-25 (+227015)	Merged-chr10-13641955-2 (+227002)	Merged-chr10-13641954-2 (+227003)	2.75251	1.68345	1.66938	2.75409	1.43401	1.44072	3.05299	2.82915	1.88437	3.2234	2.53044	2.28389	3.85635	3.06678	2.37028	4.15066	3.68785	3.06519	2.03511	1.87628	2.58884	2.67924	3.0978	3.63456
15273	Hivep2	No_BS	No_BS	Merged-chr10-13995956-2 (+29577), Merged-chr10-14450281-1 (+483902)	0.707156	0.282567	0.138563	0.501683	0.223506	0.0673656	0.628211	0.606826	0.28563	0.641802	0.57339	0.277244	0.968712	0.417045	0.322069	1.01517	0.687653	0.225289	0.376095	0.264185	0.506889	0.497479	0.569276	0.642705
215798	Adgrg6	No_BS	No_BS	No_BS	0.185828	0.339445	0.416136	0.297495	0.380799	0.568036	0.333617	0.810593	0.196279	0.279795	0.512506	0.211461	0.234941	1.23206	0.170691	0.301036	1.00114	0.302309	0.313803	0.415443	0.44683	0.334587	0.545897	0.534828
66201	Vta1	No_BS	No_BS	No_BS	23.303	32.7047	31.5301	24.3344	32.352	26.9705	30.583	31.5894	24.84	29.3348	33.4475	28.5168	31.1916	38.4979	23.848	27.4201	31.4202	26.7856	29.1793	27.8856	29.0041	30.433	31.1791	28.542
69412	1700016L04Rik	No_BS	No_BS	No_BS	0.0759066	0	0	0	0	0	0.0822348	0.0399614	0	0	0	0	0.0357327	0.0486586	0.0508399	0.0457854	0.0374686	0.0514526	0.0253022	0	0.0407321	0	0.0450771	0.0449022
76743	Gje1	No_BS	No_BS	No_BS	0.467671	0.453834	1.00801	0.253592	0.454811	0.582597	0.379995	0.393932	0.704369	0.492909	0.42134	0.756695	0.462324	0.419709	0.68911	0.423135	0.461698	0.855917	0.643171	0.430334	0.492766	0.556981	0.523714	0.58025
18101	Nmbr	No_BS	No_BS	No_BS	0	0	0.0769242	0.106438	0.14317	0	0.0318984	0.0620032	0	0	0	0	0.027721	0.113246	0.236646	0.106559	0.0872031	0.0399163	0.0256414	0.0832029	0.0313005	0	0.125871	0.0778929
77538	C330004P14Rik	No_BS	No_BS	No_BS	0.604956	0.376722	0.287363	1.04375	0.534837	0.644808	0.119162	0.347435	0.301202	0.708448	0.28313	0.342246	0.414226	0.211525	0.294677	0.13269	0.162881	0.223671	0.423014	0.741131	0.255933	0.444608	0.30681	0.173081
100504235	Gm20125	No_BS	No_BS	No_BS	0	0.0231874	0.0132655	0.00917759	0.0123448	0.0148831	0.0110017	0.0320772	0	0	0	0	0	0.0130195	0	0	0.0300762	0	0.012151	0.0121352	0.0143596	0	0.00433983	0.0100254
17684	Cited2	No_BS	Merged-chr10-17723244-1 (+16)	No_BS	18.1195	22.3485	20.6219	11.1917	13.1349	16.3241	22.3285	35.1644	18.2527	13.8038	25.3975	15.8933	28.3221	67.3297	23.3084	22.832	48.0536	21.7582	20.3633	13.5502	25.2485	18.3649	39.6534	30.8813
378431	Txlnb	No_BS	Merged-chr10-17827602-2 (+31346)	No_BS	0.255718	0.176936	0.24294	0.322144	0.395638	0.397489	0.226667	0.252931	0.27586	0.353914	0.388962	0.298983	0.299122	0.347717	0.238743	0.430015	0.382504	0.210105	0.225198	0.371757	0.251819	0.347286	0.295194	0.340875
380629	Heca	No_BS	Merged-chr10-17827602-2 (+120465)	No_BS	4.53028	3.20431	3.49412	4.24742	3.34321	3.45088	4.07126	3.62955	4.17823	4.34571	4.0245	3.96218	4.00807	3.59837	4.27696	4.96522	4.28646	4.44341	3.7429	3.6805	3.95968	4.11079	3.96113	4.56503
73112	Abracl	No_BS	No_BS	No_BS	39.0998	16.5023	39.8246	30.5579	13.9431	47.2429	28.1781	23.4352	63.1101	21.2716	26.2867	48.1338	32.8781	29.6835	78.0782	42.3334	30.1395	104.106	31.8089	30.5813	38.2411	31.8974	46.8799	58.8598
19707	Reps1	No_BS	No_BS	No_BS	21.3188	23.375	16.8194	24.0357	24.6648	16.7823	23.6535	23.4191	16.4012	26.9434	26.4195	20.4258	23.6982	22.5117	16.6643	26.3229	24.6932	16.0604	20.5044	21.8276	21.1579	24.5962	20.9581	22.3588
100045792	Ect2l	No_BS	No_BS	No_BS	0.0119095	0.0271932	0.0311145	0.0107631	0.0144775	0.0174543	0.0129024	0.0250792	0.0163065	0	0	0	0	0.0152687	0.0478596	0.0143671	0	0	0.0234057	0.0142316	0.018096	0	0.0210428	0.00478905
215814	Ccdc28a	No_BS	No_BS	No_BS	4.97624	5.61356	7.35167	5.56801	5.50915	8.98611	6.41798	5.83211	10.8691	6.48662	7.05274	10.1382	6.33045	6.18999	11.5859	5.50289	5.73147	11.324	5.98049	6.68776	7.7064	7.89253	8.03545	7.51945
215819	Nhsl1	chr10-148 (+99199)	No_BS	Merged-chr10-18495094-2 (+87419)	2.7677	1.40951	0.903856	2.6566	1.72073	1.12012	2.36152	1.54754	1.35606	3.0823	1.7287	1.56477	2.28644	1.06103	1.55689	3.03879	1.78139	1.07904	1.69369	1.83248	1.75504	2.12526	1.63478	1.96641
56016	Hebp2	chr10-148 (+39202)	No_BS	Merged-chr10-18495094-2 (+50982)	2.18798	1.67217	1.60623	2.27152	2.11023	2.33211	2.29203	2.0372	3.78805	2.87992	2.90912	3.51091	2.89416	3.33833	3.22155	3.62112	4.28437	4.65767	1.82212	2.23795	2.70576	3.09998	3.15135	4.18772
215821	Arfgef3	No_BS	No_BS	No_BS	0.895385	0.561506	0.582071	0.699025	0.505902	0.609923	0.642134	0.522281	0.581325	0.497206	0.340851	0.413328	0.660942	0.258691	0.602517	0.60854	0.33615	0.273545	0.679654	0.60495	0.581913	0.417128	0.507384	0.406078
237300	Gm4922	No_BS	No_BS	No_BS	0.0146656	0.0837159	0.0574726	0.0132539	0.0356558	0	0.0158883	0.0154416	0.0401603	0.0171745	0.0188753	0	0.0138075	0.0376045	0.0196451	0	0.0579132	0.0596457	0.0519514	0.0163033	0.02383	0.0120166	0.0236857	0.0391863
73968	4930444F02Rik	No_BS	No_BS	No_BS	0.0164386	0	0.0107368	0	0.00999161	0	0.00890453	0.00865419	0.0112539	0	0.0105786	0	0.0077384	0	0.0330302	0	0.00811433	0.0111428	0.00905846	0.00333054	0.0096042	0.00352621	0.0135895	0.00641903
64058	Perp	No_BS	No_BS	No_BS	14.7966	15.5853	24.1727	7.42541	8.86099	12.4679	13.411	19.771	40.4692	8.00404	9.10083	14.0044	20.8107	22.3028	50.5012	10.8986	11.0006	29.966	18.1849	9.58476	24.5504	10.3698	31.2049	17.2884
21929	Tnfaip3	No_BS	No_BS	No_BS	0.879409	0.892435	0.402559	0.638525	0.621319	0.385552	0.757294	1.1317	0.545442	0.677767	1.01575	0.402264	1.21717	1.53219	0.724925	0.707257	1.38018	0.275123	0.724801	0.548465	0.81148	0.698595	1.15809	0.78752
100504265	Gm20139	No_BS	No_BS	No_BS	0.016658	0.0126785	0.0290135	0.0200727	0.0404997	0.0325514	0.0120311	0	0.0228081	0.0195077	0	0.0414657	0.0261389	0	0.022314	0.0200955	0.00548174	0.0376381	0.01945	0.0310413	0.0116131	0.0203245	0.016151	0.0210718
94222	Olig3	No_BS	No_BS	No_BS	0.267473	0.32445	0.349398	0.211511	0.162574	0.122501	0.452769	0.158414	0.25178	0	0.0430313	0.0624193	0.456431	0.0642971	0.156752	0.524338	0.0825179	0.339946	0.313774	0.165529	0.287654	0.0351502	0.225827	0.315601
15979	Ifngr1	No_BS	No_BS	No_BS	2.87949	2.83657	2.19239	2.5131	2.72031	2.99026	2.88782	3.39567	3.67226	3.0638	3.21896	3.91155	3.06733	4.85195	2.71106	3.59281	4.06103	4.03752	2.63615	2.74122	3.31858	3.3981	3.54344	3.89712
237310	Il22ra2	No_BS	No_BS	No_BS	0	0	0	0	0	0	0	0	0	0	0	0	0	0	0	0.016882	0	0	0	0	0	0	0	0.00562732
237313	Il20ra	No_BS	No_BS	No_BS	0.0330819	0.0566526	0.0216073	0	0	0.0242421	0.0895997	0.0522484	0.0226479	0.0193707	0.0425779	0	0.0467195	0.106033	0.0221572	0.0598631	0.0816485	0	0.0371139	0.00808069	0.054832	0.0206495	0.0583032	0.0471705
76157	Slc35d3	No_BS	No_BS	No_BS	0.289017	0.179978	0.171609	0.154343	0.255518	0.0962675	0.469667	0.539456	0.215848	0.0923073	0.101448	0.065403	0.581319	0.791604	0.22877	0.25357	0.713314	0.195907	0.213535	0.16871	0.408324	0.0863862	0.533898	0.387597
18634	Pex7	No_BS	No_BS	No_BS	15.8464	13.8651	21.8434	15.623	12.591	26.8321	15.9229	12.6336	26.3409	12.9196	12.8613	18.8603	14.0265	16.2248	24.1581	12.165	12.4756	22.3232	17.185	18.3487	18.2991	14.8804	18.1365	15.6546
26408	Map3k5	No_BS	No_BS	No_BS	1.72912	0.913921	1.29668	1.71316	0.84857	0.788404	1.48474	1.59134	1.09607	1.68744	1.45891	0.948516	1.36265	1.54358	0.926488	1.43698	1.6691	0.902924	1.31324	1.11671	1.39072	1.36495	1.27757	1.33633
17761	Map7	No_BS	Merged-chr10-20153841-1 (+4921)	Merged-chr10-20297652-2 (+148732)	18.355	17.0071	15.4286	18.9522	19.133	17.1281	17.9639	15.9464	17.2279	18.2033	15.3269	19.8211	16.8887	9.95858	15.8688	22.7204	15.792	18.9932	16.9302	18.4044	17.0461	17.7837	14.2387	19.1685
73811	4930405J17Rik	No_BS	No_BS	No_BS	0	0	0.0717266	0.0496232	0	0	0	0	0	0	0	0.0683404	0	0	0	0.0662396	0	0.0744385	0.0239089	0.0165411	0	0.0227801	0	0.0468927
621697	Gm6251	No_BS	No_BS	No_BS	0.525063	0.333025	0.228629	0.843595	0.496441	0.34201	0.505633	0.368563	0.159759	0.546567	0.525607	0.363058	0.988686	0.224388	0.312597	0.844555	0.172786	0.158182	0.362239	0.560682	0.344652	0.478411	0.508557	0.391841
102466647	Mir6413	No_BS	No_BS	No_BS	0	0	0	0	0	0	0	0.336712	0	0	0	0	0	0	0	0	0	0	0	0	0.112237	0	0	0
72567	Bclaf1	No_BS	No_BS	No_BS	65.4718	63.8734	109.175	68.5839	62.4998	112.112	66.9647	58.0145	120.051	71.9484	60.3687	100.419	69.4514	46.7798	102.089	70.6558	52.3387	103.842	79.5068	81.0652	81.6769	77.5788	72.7733	75.6123
71804	Mtfr2	No_BS	No_BS	No_BS	6.72186	7.98175	10.5994	7.31956	7.9529	9.43455	7.42822	8.24397	10.6179	7.18806	8.03477	8.31027	7.04742	10.518	10.6486	7.29629	8.17309	11.4264	8.43435	8.23567	8.76338	7.84437	9.40468	8.96526
29863	Pde7b	No_BS	No_BS	No_BS	0	0.0095542	0	0	0	0	0	0.0176229	0.0114584	0.00980033	0	0.0104158	0	0	0	0.0302869	0.00826179	0.0113452	0.00318473	0	0.00969377	0.00673872	0	0.0166313
52906	Ahi1	chr10-119 (-420), chr10-102 (+149651)	Merged-chr10-21102155-2 (+149608)	No_BS	3.8714	2.99558	2.77215	4.41786	3.61824	3.43809	4.00318	3.29097	3.41623	4.63691	4.81687	3.86487	3.79809	2.90328	2.8427	4.00779	3.91567	3.66744	3.21304	3.82473	3.57013	4.43955	3.18136	3.86363
17863	Myb	chr10-102 (+58786)	Merged-chr10-21102155-2 (+58829)	No_BS	1.24361	1.30494	0.800311	2.76843	2.25653	1.34015	1.88223	1.96411	1.3647	3.61947	3.69545	2.78835	1.61852	1.98126	0.869676	4.15875	4.1887	3.17352	1.11629	2.1217	1.73701	3.36776	1.48982	3.84032
56422	Hbs1l	No_BS	No_BS	No_BS	17.5546	19.4613	19.7411	21	23.3306	21.8897	20.7693	20.8468	18.0728	23.1202	23.7746	20.7595	20.6345	22.9948	16.8303	18.9207	20.4523	18.6024	18.919	22.0735	19.8963	22.5514	20.1532	19.3251
73990	4930455C13Rik	No_BS	No_BS	No_BS	0.0339936	0.0388092	0.0444055	0.0921644	0.0413236	0.0996406	0	0	0	0.119427	0.0437513	0.0423091	0	0.174328	0.0455358	0.0410086	0.0671189	0.138253	0.0390695	0.0777095	0	0.0684958	0.0732879	0.082127
237320	Aldh8a1	No_BS	No_BS	No_BS	0.0153979	0.0351584	0	0	0	0.0225668	0	0.0162126	0	0.0180321	0.0198178	0.0383291	0.043491	0.0197411	0.144383	0.0557263	0.0152013	0.0208747	0.0168521	0.00752228	0.0054042	0.025393	0.0692049	0.0306007
67692	1700020N01Rik	No_BS	No_BS	No_BS	0.976555	0.929081	1.44575	0.676625	0.87056	2.19454	0.670047	1.0625	2.45135	0.533688	1.0055	1.6611	1.01136	1.41894	2.35464	0.431962	0.674858	1.80933	1.11713	1.24724	1.39463	1.06676	1.59498	0.972049
432436	Gm5420	chr10-120 (-4305), chr10-103 (+136091)	No_BS	No_BS	0	0	0	0	0	0	0	0	0	0	0	0	0	0	0	0	0	0	0	0	0	0	0	0
20393	Sgk1	chr10-103 (-55248), chr10-149 (+65370)	No_BS	No_BS	52.392	47.303	64.6515	43.7673	35.5613	50.447	52.9794	52.4697	73.3278	56.1495	56.4383	81.7635	55.952	66.2645	65.5179	23.0825	35.7451	40.5256	54.7821	43.2585	59.5923	64.7838	62.5781	33.1177
114671	4930444G20Rik	chr10-149 (+120525)	No_BS	No_BS	0.253522	0.111322	0.738772	0.440613	0.213361	0.800276	0.0845101	0.0821341	0.45393	0.319731	0.150597	0.679622	0.165246	0.150015	0.130616	0.188209	0.154021	0.237943	0.367872	0.48475	0.206858	0.383317	0.148626	0.193391
319887	E030030I06Rik	No_BS	No_BS	No_BS	1.13015	0.877373	1.16136	1.2665	1.31889	1.03797	0.783599	0.745702	1.13477	1.35879	0.640006	1.18155	0.709354	0.482977	1.13037	0.636241	0.63968	0.898849	1.0563	1.20778	0.888022	1.06012	0.774233	0.724923
19368	Raet1a	No_BS	No_BS	No_BS	0.782403	0.893241	0.934442	1.35357	1.65765	2.06401	1.42886	1.0121	1.40795	1.78015	1.55364	1.91977	1.55744	1.11773	1.73678	0.835991	0.441378	1.33344	0.870028	1.69175	1.28297	1.75118	1.47065	0.870269
379043	Raet1e	No_BS	No_BS	No_BS	0.189766	0	0.0708258	0.1225	0.13182	0.158924	0.117478	0.0856316	0.111355	0.126989	0.104674	0.134964	0.102093	0.104268	0.145257	0	0.16058	0.110256	0.0868641	0.137748	0.104822	0.122209	0.117206	0.0902784
19369	Raet1b	No_BS	No_BS	No_BS	0	0	0	0	0	0	0	0	0	0	0	0	0	0	0	0	0	0	0	0	0	0	0	0
19370	Raet1c	No_BS	Merged-chr10-22196673-2 (+38104)	No_BS	0	0	0	0	0	0	0	0	0	0	0	0	0	0	0	0	0	0	0	0	0	0	0	0
667281	H60b	No_BS	Merged-chr10-22196673-2 (-76673)	No_BS	1.34373	1.07801	1.70786	1.44413	1.32444	1.33064	1.02296	0.53534	0.994507	1.06325	0.654384	1.31083	1.43607	0.744972	1.84863	0.525738	0.358532	0.590812	1.37653	1.3664	0.850937	1.00949	1.34322	0.491694
606736	C920009B18Rik	No_BS	No_BS	No_BS	0.0535465	0.0174663	0.0299774	0.0138264	0.0185979	0.0448438	0.0248617	0.0241627	0.0837897	0.0447907	0.0196905	0.0190415	0.0216058	0.0588429	0.0409872	0.0369122	0.0226554	0.0103703	0.0336634	0.025756	0.0442714	0.0278409	0.0404787	0.0233127
56554	Raet1d	No_BS	No_BS	No_BS	0	0.031023	0.106489	0.0491157	0.0330328	0.119475	0.147194	0.0858337	0.111618	0.0636443	0.069947	0.0676414	0.0255836	0.0348382	0	0.131124	0.0268264	0	0.0458375	0.0672077	0.114882	0.0670776	0.0201406	0.0526502
100038752	Gm10825	No_BS	No_BS	No_BS	0.167068	0.0693583	0.13888	0.247069	0.120009	0.133555	0.0658168	0.119937	0.187159	0.28458	0.12706	0.255194	0.0714969	0.029208	0.142414	0.109933	0.104958	0.0514752	0.125102	0.166878	0.124304	0.222278	0.0810397	0.0887889
353169	Slc2a12	No_BS	No_BS	No_BS	0.0550837	0.0838494	0.0119926	0.099563	0.0558011	0.0807296	0.04973	0.0483319	0.0251402	0.0860095	0.106343	0.137117	0.0777913	0.0706209	0.0737868	0.398705	0.226584	0.12446	0.0503086	0.0786979	0.0410674	0.109823	0.0740663	0.249917
237336	Tbpl1	No_BS	No_BS	No_BS	9.44225	11.2462	11.6125	11.4864	11.2154	12.5355	9.82599	11.1055	11.6947	13.0553	13.0958	13.1126	10.6203	12.4752	10.846	13.3762	12.1798	15.9276	10.767	11.7458	10.8754	13.0879	11.3138	13.8279
102465768	Mir7663	No_BS	No_BS	No_BS	0	0	0	0	0	0	0	0	0	0.663049	0	0	0	0	0	0.683028	0	0	0	0	0	0.221016	0	0.227676
21412	Tcf21	No_BS	No_BS	No_BS	0	0.0321354	0	0.0254385	0	0	0.0304946	0	0.0770803	0.0329633	0.0724553	0.0350335	0	0.0721749	0	0.0339566	0.0833653	0.0381596	0.0107118	0.00847949	0.0358583	0.0468174	0.0240583	0.0518272
14051	Eya4	No_BS	No_BS	No_BS	0.134813	0.0769557	0	0.0837626	0.030728	0.0493949	0.109539	0.10646	0.149977	0.236815	0.0650666	0.125844	0.126926	0.0540123	0.180588	0.660699	0.207956	0.319837	0.0705897	0.0546285	0.121992	0.142575	0.120509	0.396164
20042	Rps12	No_BS	No_BS	No_BS	3504.82	3897.88	6999.52	3611.79	3677.07	9164.39	3480.99	2925.2	7050.96	3078.66	3224.44	5800.8	3266.49	2978.85	6798.36	2886.13	2636.81	7571.94	4800.74	5484.42	4485.72	4034.63	4347.9	4364.96
100529074	Snora33	No_BS	No_BS	No_BS	12.4993	11.2658	24.9212	13.0797	10.3962	29.8884	11.4032	6.23398	27.0222	8.08919	7.62023	28.248	7.12272	5.06049	25.5555	7.93613	7.79347	24.9716	16.2288	17.7881	14.8865	14.6525	12.5796	13.5671
100529075	Snord100	No_BS	No_BS	No_BS	15.2371	18.5554	55.0681	17.9016	16.053	64.7605	13.2059	6.95211	44.5071	13.0855	5.88327	42.9861	10.5201	6.51166	28.575	12.867	11.5326	46.8218	29.6202	32.905	21.555	20.6516	15.2023	23.7405
76306	Slc18b1	No_BS	No_BS	No_BS	3.29914	3.8777	3.83256	3.28963	3.37417	3.55054	2.08384	2.07653	1.78354	2.5947	1.75486	2.34855	2.05164	1.21741	1.89167	2.18824	1.55038	2.0795	3.6698	3.40478	1.9813	2.23271	1.72024	1.93938
26464	Vnn3	No_BS	No_BS	No_BS	0	0	0	0	0	0	0	0	0	0	0	0	0	0	0	0	0	0	0	0	0	0	0	0
22361	Vnn1	No_BS	No_BS	No_BS	0.0714766	0.685459	0.0373477	0.0387579	0.538711	0	0.37169	2.13734	0.156585	0.301336	2.18945	0.071169	0.336473	5.36996	0.0574474	0.241435	3.26005	0.0193799	0.264761	0.19249	0.888539	0.853985	1.92129	1.17362
111174	Taar1	No_BS	No_BS	No_BS	0	0	0	0	0	0	0	0	0	0	0	0	0	0	0	0	0	0	0	0	0	0	0	0
209512	Taar2	No_BS	No_BS	No_BS	0	0	0	0	0	0	0	0	0	0	0	0	0	0	0	0	0	0	0	0	0	0	0	0
493809	Taar3	No_BS	No_BS	No_BS	0	0	0	0	0	0	0	0	0	0	0	0	0	0	0	0	0	0	0	0	0	0	0	0
209513	Taar4	No_BS	No_BS	No_BS	0.0330819	0	0	0	0	0	0	0	0	0	0	0	0	0	0	0	0	0	0.0110273	0	0	0	0	0
215854	Taar5	No_BS	No_BS	No_BS	0	0	0	0	0	0	0	0	0	0	0	0	0	0	0	0	0	0	0	0	0	0	0	0
215855	Taar6	No_BS	No_BS	No_BS	0	0	0	0	0	0	0	0	0	0	0	0	0	0	0	0	0	0	0	0	0	0	0	0
215856	Taar7a	No_BS	No_BS	No_BS	0	0	0	0	0	0	0	0	0	0	0	0	0	0	0	0	0	0	0	0	0	0	0	0
209517	Taar7b	No_BS	No_BS	No_BS	0	0	0	0	0	0	0	0	0	0	0	0	0	0	0	0	0	0	0	0	0	0	0	0
435206	Taar7d	No_BS	No_BS	No_BS	0	0	0	0	0	0	0	0	0	0	0	0	0	0	0	0	0	0	0	0	0	0	0	0
276742	Taar7e	No_BS	No_BS	No_BS	0	0	0	0	0	0	0	0	0	0	0	0	0	0	0	0	0	0	0	0	0	0	0	0
435207	Taar7f	No_BS	No_BS	No_BS	0	0	0	0	0	0	0	0	0	0	0	0	0	0	0	0	0	0	0	0	0	0	0	0
215859	Taar8a	No_BS	No_BS	No_BS	0	0	0	0	0	0	0	0	0	0	0	0	0	0	0	0	0	0	0	0	0	0	0	0
382348	Taar8b	No_BS	No_BS	No_BS	0	0	0	0	0	0	0	0	0	0	0	0	0	0	0	0	0	0	0	0	0	0	0	0
494546	Taar8c	No_BS	No_BS	No_BS	0	0	0	0	0	0	0	0	0	0	0	0	0	0	0	0	0	0	0	0	0	0	0	0
503558	Taar9	No_BS	No_BS	No_BS	0	0	0	0	0	0	0	0	0	0	0	0	0	0	0	0	0	0	0	0	0	0	0	0
53331	Stx7	chr10-58 (+17000)	No_BS	No_BS	12.2125	14.2895	11.7663	14.4079	14.3084	14.1121	12.4673	16.8879	15.8323	13.8811	18.4029	15.4234	13.4489	30.7298	13.2686	17.9325	21.5489	20.3207	12.7561	14.2762	15.0625	15.9024	19.1491	19.934
59012	Moxd1	chr10-58 (-57200)	No_BS	No_BS	0.985825	0.422055	0.599986	1.01242	0.449399	0.574638	0.995193	0.731308	1.24242	1.54805	1.68693	1.47795	1.02307	0.689395	1.36557	1.85146	1.08383	1.73133	0.669289	0.67882	0.989642	1.57098	1.02601	1.55554
14219	Ctgf	No_BS	No_BS	No_BS	18.7929	28.5959	14.2561	13.7353	18.1083	13.9925	27.9302	66.6437	21.2032	21.9405	62.4206	16.8222	48.5044	126.847	32.2618	35.7151	102.573	33.2938	20.5483	15.2787	38.5924	33.7278	69.2043	57.194
18605	Enpp1	chr10-77 (-123008)	Merged-chr10-24834790-1 (-122632)	No_BS	0.0967722	0.157	0.0598797	0.0736481	0.130022	0.037323	0.126912	0.455835	0.0557898	0.0775398	0.334319	0.0380352	0.129472	0.783589	0.0614038	0.110598	0.487738	0.0759534	0.104551	0.0803311	0.212845	0.149965	0.324822	0.224763
209558	Enpp3	chr10-77 (+1029)	Merged-chr10-24834790-1 (+1405)	No_BS	23.8634	18.5035	17.1489	35.9587	28.0694	23.088	27.408	26.87	22.1241	34.3396	38.9087	29.4871	29.1554	28.6911	19.3275	36.0551	44.0165	26.6128	19.8386	29.0387	25.4674	34.2451	25.7246	35.5615
70208	Med23	No_BS	No_BS	No_BS	9.39202	9.20782	11.9221	9.59235	9.4054	9.41529	8.662	9.74191	9.33155	9.60857	8.77164	9.47328	8.94113	7.75291	8.68976	9.11468	8.73436	8.08448	10.174	9.47101	9.24516	9.2845	8.46126	8.64451
102465545	Mir6905	No_BS	No_BS	No_BS	0	0.563289	0.644515	0	0	0	0	0	0.675554	0	0	0.614087	0	0	0	0	0	0	0.402601	0	0.225185	0.204696	0	0
11846	Arg1	No_BS	Merged-chr10-25270330-1 (-342860)	No_BS	0	0.0533923	0.183274	0.126796	0.113703	0.205623	0.025333	0.0246208	0.0640336	0.0273839	0.150478	0.0291037	0.0880617	0	0.0626463	0.141045	0.0692547	0.158503	0.0788889	0.148707	0.0379958	0.0689887	0.050236	0.122934
432442	Akap7	chr10-51 (-15149)	Merged-chr10-25314313-2 (-15149), Merged-chr10-25270330-1 (+28834)	Merged-chr10-25314303-1 (-15139)	4.47892	4.02761	4.3917	4.85735	5.75391	6.24006	6.36194	5.29812	7.49534	8.06847	7.81421	7.69428	5.4559	6.40866	6.01451	7.36437	7.53331	7.03152	4.29941	5.61711	6.38513	7.85899	5.95969	7.30973
13822	Epb4.1l2	chr10-51 (-45485)	Merged-chr10-25314313-2 (-45485)	Merged-chr10-25314303-1 (-45495), Merged-chr10-25534060-2 (+174262)	40.9373	39.3772	32.9449	44.2983	41.6273	31.1099	39.0517	41.5226	32.0627	49.1369	46.6127	38.2955	41.8864	38.1578	29.5748	49.5626	47.6494	33.645	37.7531	39.0118	37.5457	44.6817	36.5396	43.619
100504474	Smlr1	chr10-28 (-171911)	Merged-chr10-25708125-2 (-171853)	Merged-chr10-25708199-2 (-171927), Merged-chr10-25534060-2 (+2212)	0	0	0	0	0	0	0	0	0	0	0	0	0	0	0	0	0	0	0	0	0	0	0	0
73803	4930401C15Rik	No_BS	No_BS	No_BS	0	0.045584	0	0	0	0	0	0	0	0	0	0	0	0	0	0	0.0394178	0	0.0151947	0	0	0	0	0.0131393
751520	Mir680-3	No_BS	No_BS	No_BS	0	0	0	0	0	0	0	0	0	0	0	0	0	0	0	0	0.587869	0	0	0	0	0	0	0.195956
77220	Tmem200a	chr10-28 (+370869)	Merged-chr10-25708125-2 (+370927)	Merged-chr10-26195059-2 (-116007), Merged-chr10-25708199-2 (+370853)	0.142682	0.0479103	0.0986742	0.530962	0.224463	0.147609	0.145485	0.326975	0.137902	0.471788	0.604927	0.376063	0.260766	0.355095	0.168643	0.891007	0.737444	0.318593	0.0964222	0.301011	0.203454	0.484259	0.261501	0.649015
100040851	Gm9767	No_BS	No_BS	No_BS	0	0	0	0.0261635	0	0	0	0	0.0396385	0	0	0	0	0	0	0	0	0	0	0.00872115	0.0132128	0	0	0
268288	Samd3	No_BS	No_BS	Merged-chr10-26195059-2 (-34648)	0	0.0110946	0	0	0	0	0	0	0	0.0113804	0.0125074	0	0	0	0	0	0	0	0.0036982	0	0	0.00796261	0	0
237339	L3mbtl3	chr10-78 (-385715)	Merged-chr10-26759671-2 (-385715), Merged-chr10-26695366-1 (-321410)	No_BS	1.54917	1.26001	0.886184	1.78438	1.21855	0.474863	1.54669	2.46271	0.526817	2.15807	2.56726	0.894756	1.75406	2.95974	0.759543	1.86887	2.59896	0.727516	1.23179	1.15927	1.51207	1.87336	1.82445	1.73178
667572	Gm8709	No_BS	No_BS	No_BS	0.200466	0.032695	0.149639	0.0258814	0.10444	0.209857	0.124102	0.0904599	0.196056	0.301836	0.184292	0.178218	0.10785	0.110147	0.153447	0.172739	0.113089	0.0388241	0.1276	0.113393	0.136873	0.221449	0.123815	0.108218
73910	Arhgap18	chr10-78 (-12806)	Merged-chr10-26695366-1 (-77111), Merged-chr10-26759671-2 (-12806)	No_BS	0.907373	0.741497	0.948235	1.45879	1.1843	0.979873	1.17962	1.59901	1.1116	2.44958	3.45432	1.39087	1.38484	2.17968	1.01075	0.933308	1.42383	0.60858	0.865702	1.20766	1.29674	2.43159	1.52509	0.988572
16773	Lama2	No_BS	No_BS	Merged-chr10-27807969-2 (-191027)	0.0320022	0.0121786	0.0464491	0.0931923	0.0475478	0.067747	0.0693404	0.0262076	0.0389489	0.0624616	0.0320354	0.0796612	0.0468686	0.0227938	0.0476313	0.115819	0.0386143	0.0433848	0.03021	0.0694957	0.0448323	0.0580527	0.0390979	0.0659393
75855	4930579H20Rik	No_BS	No_BS	No_BS	0	0	0	0	0	0	0	0	0	0	0	0	0	0	0	0	0	0	0	0	0	0	0	0
19272	Ptprk	No_BS	No_BS	Merged-chr10-27807969-2 (-266851)	10.8583	9.6453	8.71352	9.85355	9.49533	8.40756	14.4955	11.6565	10.381	13.4951	11.9818	11.392	14.0395	9.75621	12.051	17.281	13.5127	13.5304	9.73904	9.25215	12.1777	12.2896	11.9489	14.7747
210757	Themis	chr10-7 (+132711)	Merged-chr10-28801092-2 (+132732)	No_BS	0.148254	0.0390591	0.134074	0.0876046	0.0207948	0.0417842	0.0988393	0.126079	0.124917	0.0934858	0.044033	0.0425816	0.107369	0.0950356	0.0687434	0.0687877	0.0731804	0.0618416	0.107129	0.0500612	0.116612	0.0600335	0.0903828	0.0679366
114676	4930519F09Rik	No_BS	No_BS	No_BS	0.447087	0.178648	0.788435	0.404052	0.326095	0.950101	0.36327	0.32952	0.428507	0.57593	0.345253	0.556454	0.210465	0.315257	0.688725	0.485414	0.507584	0.697024	0.47139	0.560083	0.373766	0.492546	0.404815	0.563341
67719	2310057J18Rik	chr10-7 (+185232)	Merged-chr10-28801092-2 (+185211)	No_BS	0	0	0	0	0	0	0	0	0	0	0	0	0	0	0	0	0	0	0	0	0	0	0	0
67412	Soga3	No_BS	No_BS	No_BS	3.30846	3.47737	3.01841	0.870104	0.904385	0.705514	3.47997	3.16096	1.37816	0.686741	0.833604	0.588254	2.78527	2.37892	2.49729	0.760228	1.1233	0.676342	3.26808	0.826668	2.67303	0.702866	2.55383	0.853289
212448	9330159F19Rik	No_BS	No_BS	No_BS	0.758797	0.985056	1.53478	0.121667	0.119021	0.125557	0.470694	0.463904	0.310008	0.0644957	0.055131	0.152325	0.351439	0.313815	0.467234	0.10335	0.0906177	0.0912545	1.09288	0.122082	0.414868	0.0906505	0.377496	0.095074
52665	Echdc1	No_BS	No_BS	No_BS	1.10781	1.09115	1.30524	0.952095	0.884584	0.939129	1.17663	1.0635	1.10043	1.10654	1.14623	0.824576	1.10434	1.53167	1.19298	1.32331	1.17944	0.824536	1.16807	0.925269	1.11352	1.02578	1.27633	1.10909
68031	Rnf146	No_BS	No_BS	No_BS	3.80563	4.79604	5.21426	4.20983	4.4849	5.02085	5.30688	4.9863	5.58211	5.23728	5.21725	5.67231	4.63379	5.21693	5.82457	6.04026	5.05019	6.30456	4.60531	4.57186	5.29176	5.37561	5.22509	5.79833
72780	Rspo3	No_BS	No_BS	No_BS	0.0288293	0	0.0376595	0.0260543	0.0700914	0.126755	0.109315	0.106241	0.0789462	0.101284	0.0742093	0.0897039	0.122141	0.110883	0.115854	0.104336	0.184997	0.0781667	0.0221629	0.0743002	0.0981674	0.0883989	0.116293	0.1225
66311	Cenpw	No_BS	No_BS	No_BS	37.4841	25.3741	39.8943	37.3648	21.7699	61.2297	32.6902	19.2407	59.4863	26.2685	21.6965	44.6919	32.3232	24.8339	60.6148	26.1231	22.2799	62.4601	34.2508	40.1214	37.1391	30.8856	39.2573	36.9544
73681	Trmt11	No_BS	No_BS	No_BS	17.2907	14.6254	33.4115	12.808	12.0668	35.2541	12.7049	10.9295	33.2966	11.4188	11.061	23.871	13.0811	12.1444	32.3007	11.1801	9.4383	31.4395	21.7759	20.043	18.977	15.4503	19.1754	17.3526
100504586	Gm20300	No_BS	No_BS	No_BS	2.12847	1.98297	2.70172	2.12321	2.2701	2.2513	1.47927	1.51168	2.5294	2.06933	1.3568	1.83691	1.8527	1.28719	2.23252	1.70777	1.48676	2.74942	2.27105	2.21487	1.84012	1.75434	1.7908	1.98132
66847	Hint3	No_BS	No_BS	No_BS	14.9861	13.4833	17.826	12.1085	10.8581	23.9996	14.0313	10.2407	21.1305	11.5643	10.7296	15.811	13.5487	12.6603	20.9386	11.9128	11.5614	20.5182	15.4318	15.6554	15.1342	12.7016	15.7159	14.6641
211329	Ncoa7	No_BS	Merged-chr10-30803221-2 (-114)	No_BS	3.17683	2.6666	2.40033	2.96459	2.77644	2.55079	3.07017	2.88848	3.02974	2.57618	2.74802	2.37559	3.10061	3.2185	3.50146	3.12993	2.79133	3.45594	2.74792	2.76394	2.99613	2.5666	3.27352	3.12573
15214	Hey2	No_BS	No_BS	No_BS	0.300089	0.280309	0.142547	0.258876	0.19898	0.239893	0.280774	0.373415	0.224117	0.191687	0.316005	0.271634	0.205477	0.629563	0.146175	0.115187	0.269324	0.258889	0.240982	0.232583	0.292769	0.259775	0.327072	0.214466
69692	Hddc2	No_BS	No_BS	No_BS	28.3804	34.0484	60.9506	24.7357	29.5297	64.294	37.3647	33.6806	61.8443	28.391	34.8553	41.0703	36.2304	47.6712	50.2593	24.14	31.6745	48.713	41.1265	39.5198	44.2965	34.7722	44.7203	34.8425
21987	Tpd52l1	No_BS	No_BS	No_BS	9.92237	12.7285	15.3829	8.72092	10.3056	13.6232	10.6315	11.825	13.9963	7.72527	9.54283	10.6532	10.1888	12.3367	12.5611	7.33325	10.0379	9.83	12.6779	10.8832	12.1509	9.30711	11.6955	9.06704
100041294	Gm3258	No_BS	No_BS	No_BS	0.0972887	0.111071	0.0635437	0	0.0591334	0.0712922	0.1054	0.0512182	0	0	0.0626075	0	0.0457983	0.187096	0.065161	0.117365	0	0.0659463	0.0906345	0.0434752	0.0522059	0.0208692	0.0993516	0.0611039
268291	Rnf217	No_BS	No_BS	No_BS	0.941931	0.537684	0.394371	0.665732	0.719319	0.353968	0.8373	1.28421	0.429898	1.0465	1.47653	0.631264	1.13695	1.61016	0.744112	2.31632	1.99094	1.5389	0.624662	0.579673	0.850471	1.05143	1.16374	1.94872
432450	Nkain2	No_BS	No_BS	No_BS	0	0.0210575	0	0.00833458	0	0	0.0199823	0.0291308	0.0505087	0.0108	0.023739	0.0114783	0.0434136	0.0354707	0.0247073	0.0222508	0.00910452	0	0.00701917	0.00277819	0.0332073	0.0153391	0.0345305	0.0104518
76757	Trdn	chr10-52 (+112556)	Merged-chr10-33196109-2 (+112626)	No_BS	0.0306048	0	0	0.0138294	0	0.0224269	0.00828906	0.00805602	0.010476	0.0179202	0	0	0.0144071	0	0.0204982	0.0184602	0	0.0103726	0.0102016	0.0120854	0.00894037	0.00597341	0.0116351	0.00961093
442820	D830005E20Rik	No_BS	No_BS	No_BS	0.168567	0.149681	0.0978656	0.0677072	0.182146	0.0823494	0.0202911	0.157765	0.128223	0.153537	0.0723178	0.069934	0.0705353	0.0480253	0	0.0451895	0.147924	0.101566	0.138704	0.110734	0.102093	0.0985962	0.0395202	0.0982263
215890	Clvs2	chr10-52 (+428730)	Merged-chr10-33196109-2 (+428660)	No_BS	1.28479	0.741288	0.757949	0.886449	0.470229	0.789632	1.54157	2.02189	1.41866	0.808919	1.13795	0.980083	2.26317	1.75346	2.40575	1.81658	1.33658	1.83542	0.92801	0.715437	1.66071	0.975652	2.14079	1.66286
215895	Gm4794	No_BS	No_BS	No_BS	0	0	0	0	0	0	0	0	0	0	0	0	0	0	0	0	0	0	0	0	0	0	0	0
57430	Sult3a1	No_BS	No_BS	No_BS	0	0	0	0	0	0	0	0	0	0	0	0	0	0	0	0	0	0	0	0	0	0	0	0
212892	Rsph4a	No_BS	No_BS	No_BS	0.596126	0.918237	2.42267	0.444678	0.621144	1.91376	0.963612	0.538001	1.74904	1.11919	0.280104	1.4368	0.953231	0.533778	1.36892	0.536504	0.140122	1.03906	1.31234	0.993193	1.08355	0.945363	0.951975	0.571896
72580	Zufsp	No_BS	No_BS	No_BS	3.91542	3.30253	6.39335	4.75325	3.37441	6.01671	3.21304	3.58419	6.58122	4.00353	3.42223	4.96413	3.89266	3.91471	5.61669	4.12417	4.18272	6.29837	4.5371	4.71479	4.45948	4.12996	4.47469	4.86842
414093	A830082N09Rik	No_BS	No_BS	No_BS	0.185022	0.231351	0.293484	0.230912	0.198142	0.355097	0.20522	0.190174	0.27746	0.2889	0.243802	0.257697	0.199082	0.0960138	0.200636	0.297605	0.195706	0.203054	0.236619	0.261384	0.224284	0.263466	0.165244	0.232122
66521	Rwdd1	No_BS	No_BS	No_BS	73.9907	77.0383	102.866	67.4743	71.1645	103.48	74.8337	63.5545	98.9044	68.9301	69.9636	84.542	78.7675	79.8009	79.3591	66.4633	64.758	96.1535	84.6317	80.7064	79.0975	74.4786	79.3092	75.7916
692132	Trappc3l	No_BS	No_BS	No_BS	0.0291456	0	0	0	0	0	0	0	0	0	0	0	0	0	0	0	0	0.0395121	0.00971519	0	0	0	0	0.0131707
270711	Fam26d	No_BS	No_BS	No_BS	0.00929927	0.0106166	0.0364427	0.00840415	0.0226089	0	0.0100745	0.0097913	0.0127326	0	0	0.0115741	0.00875519	0	0.0124567	0	0	0	0.0187862	0.0103377	0.0108661	0.00385802	0.00707064	0
103511	Fam26e	No_BS	No_BS	No_BS	0.83153	2.0532	4.59749	1.08354	1.99815	4.08114	0.921803	0.834804	2.7007	1.42671	0.895996	1.94954	1.05598	0.570226	2.0205	1.1431	0.591819	1.62539	2.49407	2.38761	1.48577	1.42408	1.21557	1.1201
215900	Fam26f	No_BS	No_BS	No_BS	0.798001	0.874607	1.16751	0.80773	0.737255	1.21632	1.2795	0.840224	1.18003	0.672853	0.575156	0.635654	1.2622	0.982165	1.19723	0.847157	0.598736	0.778922	0.946707	0.920434	1.09992	0.627888	1.1472	0.741605
212898	Dse	No_BS	No_BS	No_BS	21.2375	22.4449	24.3466	17.3241	19.1391	23.0025	19.5719	18.97	22.3516	16.322	17.0125	20.2976	20.7184	21.8934	22.4149	16.1827	18.5694	20.1251	22.6763	19.8219	20.2978	17.8774	21.6756	18.2924
22110	Tspyl1	No_BS	No_BS	No_BS	21.7397	27.0863	25.4531	22.3909	27.6265	23.9006	21.7201	20.7048	22.9954	20.418	20.9726	21.3814	21.0949	25.0631	23.4925	23.4596	24.4214	27.9264	24.7597	24.6393	21.8068	20.924	23.2169	25.2691
72480	Tspyl4	No_BS	No_BS	No_BS	2.43534	3.0432	2.74167	2.44902	2.96046	2.18044	2.17785	1.75297	1.90368	1.98082	1.80085	2.02806	2.28451	1.65764	1.72008	2.47852	1.9059	1.98092	2.74007	2.52998	1.94483	1.93658	1.88741	2.12178
319638	Nt5dc1	No_BS	No_BS	No_BS	6.62519	7.81055	9.43516	7.01028	7.38907	11.033	8.40363	7.57825	11.6829	8.27981	8.80516	10.3508	8.10525	9.76557	9.02802	7.74693	8.08472	10.4298	7.95697	8.47744	9.2216	9.14527	8.96628	8.7538
12813	Col10a1	No_BS	No_BS	No_BS	0.0551717	0.025195	0	0.049861	0.040241	0.0161717	0.0358628	0.0116182	0.0302165	0.0387661	0.0426051	0.0137336	0.0103887	0.0141467	0.0443428	0.0931798	0.0217868	0.0149591	0.0267889	0.0354246	0.0258991	0.0317016	0.0229594	0.0433086
14302	Frk	No_BS	No_BS	No_BS	0.115053	0.106723	0.122113	0.298938	0.314689	0.453165	0.140225	0.249852	0.246142	0.682099	0.434981	0.411693	0.135402	0.368764	0.0963238	0.425062	0.333652	0.243711	0.11463	0.355597	0.212073	0.509591	0.200163	0.334142
319415	Hs3st5	chr10-67 (+104744)	Merged-chr10-36507260-1 (+441), Merged-chr10-36611501-2 (+104682)	Merged-chr10-36484812-2 (-22007)	0.0111591	0.0382199	0.0874624	0.16136	0.0542614	0.0817729	0.120894	0.0117496	0.0458373	0.104545	0.0574492	0.138889	0.0315187	0.0143067	0.0448443	0.0807716	0.0550831	0.0605129	0.0456138	0.0991313	0.0594938	0.100294	0.0302232	0.0654559
15182	Hdac2	chr10-67 (-362981)	Merged-chr10-36611501-2 (-363043)	Merged-chr10-37102870-1 (+128326)	83.7586	80.218	131.026	74.4034	64.8207	119.067	84.0198	69.3002	137.69	70.8612	72.3333	102.961	84.7481	75.8758	121.432	74.6389	65.7598	119.718	98.3341	86.0971	97.0032	82.0517	94.0187	86.7056
17118	Marcks	No_BS	No_BS	Merged-chr10-37102870-1 (+36050)	17.1945	12.7164	16.0482	19.8194	13.6506	19.8915	20.9699	14.7162	25.226	25.1314	18.0842	24.2451	22.7524	17.8238	23.1543	31.363	22.6033	34.6746	15.3197	17.7872	20.304	22.4869	21.2435	29.547
75877	4930591E09Rik	No_BS	No_BS	No_BS	0	0	0	0	0	0	0	0	0	0	0	0	0	0	0	0	0	0	0	0	0	0	0	0
215919	Rfpl4b	No_BS	No_BS	No_BS	0.065536	0.0748201	0.171218	0.0296139	0	0.192097	0.0709997	0	0.179464	0	0	0.0815675	0.0617017	0	0.0877881	0	0	0	0.103858	0.0739035	0.0834879	0.0271892	0.0498299	0
16775	Lama4	No_BS	Merged-chr10-39107239-1 (+141724)	No_BS	0.434146	0.163042	0.223864	0.423332	0.208327	0.167441	0.37751	0.409	0.265931	0.388003	0.374962	0.369712	0.510932	0.439424	0.306082	0.833845	0.569589	0.325259	0.273684	0.266367	0.350814	0.377559	0.418813	0.576231
66337	Fam229b	No_BS	Merged-chr10-39107239-1 (+26667)	No_BS	2.31827	2.3226	5.56225	2.22339	2.41556	6.24051	2.40903	2.29149	6.67225	2.05	2.13123	2.70871	2.36081	3.45742	4.1828	2.0547	2.42879	4.36149	3.40104	3.62649	3.79092	2.29665	3.33368	2.94832
71924	Tube1	No_BS	Merged-chr10-39161849-2 (+27826)	No_BS	4.1978	5.3848	5.60677	4.35852	5.64766	4.89066	4.62441	5.17725	5.40858	5.04021	5.17511	5.59157	4.77372	5.89584	4.29631	5.41968	6.82161	5.35518	5.06312	4.96561	5.07008	5.26896	4.98862	5.86549
327743	Wisp3	No_BS	Merged-chr10-39161849-2 (+1945)	No_BS	0.0730694	0.0278069	0.159083	0.154084	0.0296084	0.142785	0.105548	0.205162	0.133396	0.171139	0.0940438	0.121258	0.137589	0.0624532	0.0326265	0.235062	0.192363	0.165098	0.0866532	0.108826	0.148035	0.128814	0.0775561	0.197508
14360	Fyn	No_BS	No_BS	No_BS	8.4727	7.26543	6.34195	7.44538	6.53982	5.72794	8.19413	7.5789	7.39168	8.10017	7.65987	7.25573	8.39171	6.47667	6.59125	10.1985	9.28977	7.40763	7.36003	6.57105	7.72157	7.67192	7.15321	8.96531
103213	Traf3ip2	chr10-152 (+46653)	No_BS	No_BS	3.18029	4.02966	3.32036	4.23504	4.67148	2.98373	2.83204	3.37393	2.63907	3.45632	3.31796	2.80377	3.02825	3.28967	2.58189	4.0255	3.68674	2.72733	3.51011	3.96342	2.94835	3.19268	2.9666	3.47986
327744	E130307A14Rik	No_BS	No_BS	No_BS	0.747205	0.568705	0.81339	0.750312	0.731705	1.03425	0.876957	0.830448	0.9094	1.1181	1.04183	1.54998	0.87936	0.771694	0.667274	1.45226	0.6557	1.26622	0.709767	0.838756	0.872268	1.23664	0.772776	1.12472
19714	Rev3l	chr10-152 (-72531)	No_BS	No_BS	4.5629	3.40508	5.26671	5.34118	3.75166	4.77935	3.6873	4.04054	5.13459	5.15008	3.7595	4.59889	3.73798	1.99703	4.56353	5.02789	3.64143	4.93901	4.41156	4.62406	4.28748	4.50282	3.43285	4.53611
213332	AA474331	No_BS	No_BS	No_BS	1.85733	1.11071	0.808738	1.11903	1.0214	0.712922	1.054	1.11749	1.08988	1.86435	1.0814	1.1008	1.54049	1.304	1.30322	1.28035	0.82949	0.659463	1.25893	0.951116	1.08712	1.34885	1.38257	0.923101
72045	2010001E11Rik	No_BS	No_BS	No_BS	0.0755744	0.103537	0.0789777	0.0956197	0.110244	0.0443041	0.114625	0.0318292	0.0206953	0.0885032	0.0389071	0.0376246	0.0711527	0.0193782	0.121482	0.054702	0.119375	0.0614729	0.0860296	0.0833894	0.0557165	0.0550116	0.0706709	0.0785165
100041085	G630090E17Rik	No_BS	Merged-chr10-39967713-1 (-7560)	Merged-chr10-39967708-1 (-7555)	0.0581439	0	0.0253176	0.0525471	0.0235605	0.0568097	0.167977	0.122441	0.106148	0.0453939	0.0498893	0.0964895	0.0364947	0.0993924	0.12981	0.0701426	0.0382676	0.131374	0.0278205	0.0443058	0.132188	0.0639242	0.0885657	0.0799282
215928	BC021785	No_BS	Merged-chr10-39967713-1 (+18926)	Merged-chr10-39967708-1 (+18931)	0.0750689	0.0922961	0.0980619	0.0782804	0.0491378	0.11002	0.0750714	0.0668808	0.047439	0.0946737	0.0668888	0.0934324	0.0869869	0.04442	0.0928226	0.0626956	0.0570079	0.0861127	0.0884756	0.0791459	0.0631304	0.0849983	0.0747431	0.0686054
215929	AI317395	No_BS	No_BS	No_BS	0.103135	0.0294365	0.134725	0.11651	0.109703	0.0944708	0.0838003	0.0271481	0.10591	0.0905845	0.0497775	0.0802279	0.109239	0.132226	0.069077	0.0777617	0.127273	0.104864	0.089099	0.106894	0.0722861	0.07353	0.103514	0.1033
72472	Slc16a10	No_BS	No_BS	No_BS	1.13264	0.703681	0.523005	1.26642	0.806906	0.69487	0.719115	0.843115	0.584257	0.950073	0.935675	0.74747	0.912612	0.803727	0.719793	1.01048	1.00375	0.785601	0.78644	0.922733	0.715496	0.877739	0.812044	0.933277
67239	Rpf2	No_BS	No_BS	No_BS	42.9434	49.2982	62.685	41.4026	45.6501	75.1495	41.2575	40.4824	72.2342	37.557	48.0733	60.9766	41.1879	51.2609	70.4491	34.9631	40.6271	74.8406	51.6422	54.0674	51.3247	48.8689	54.2993	50.1436
67371	Gtf3c6	No_BS	Merged-chr10-40258513-1 (-848)	Merged-chr10-40258588-1 (-923)	24.8534	42.2135	32.8639	24.6338	38.7741	25.2095	36.8299	38.1475	24.3862	35.1325	38.0451	21.5773	36.6611	41.5878	26.0804	28.2258	31.6228	21.6666	33.3103	29.5391	33.1212	31.585	34.7764	27.1717
11702	Amd1	No_BS	Merged-chr10-40301587-1 (+601)	No_BS	0	0.0122989	0	0	0	0	0	0	0	0	0	0	0	0	0	0	0	0	0.00409963	0	0	0	0	0
100041585	Amd2	No_BS	No_BS	Merged-chr10-36484812-2 (-772921)	0	0	0	0	0	0	0	0	0	0	0	0	0	0	0	0	0	0	0	0	0	0	0	0
78334	Cdk19	chr10-21 (+116521)	Merged-chr10-40465379-2 (+116071), Merged-chr10-40465830-2 (+116522)	No_BS	2.53961	2.31543	2.79693	2.75203	2.51605	2.68472	2.27452	2.04149	2.93163	3.18999	1.95963	3.17566	2.34063	1.84529	2.69284	3.02064	2.20185	3.04781	2.55066	2.65093	2.41588	2.77509	2.29292	2.75677
70840	Slc22a16	chr10-21 (-104507)	Merged-chr10-40465379-2 (-104957), Merged-chr10-40465830-2 (-104506)	No_BS	0	0.0175792	0	0	0	0.0225668	0	0	0.0421657	0	0	0.0191646	0	0	0	0	0	0	0.00585974	0.00752228	0.0140552	0.00638818	0	0
70503	Ddo	No_BS	No_BS	No_BS	0.0115125	0.0394302	0	0.0104043	0.0559796	0.0168725	0	0	0	0	0	0.0429861	0	0	0.0308429	0	0	0	0.0169809	0.0277522	0	0.0143287	0.010281	0
327747	Mettl24	No_BS	No_BS	No_BS	0.0677648	0.103153	0.0295069	0.061242	0	0.0331049	0.195772	0.0951338	0.15464	0.0264526	0.0581443	0.112455	0.148867	0.0868789	0.211805	0.0817489	0.0668994	0.214358	0.0668082	0.031449	0.148515	0.0656841	0.149184	0.121002
71713	Cdc40	No_BS	No_BS	No_BS	13.1479	14.3308	15.6197	13.4035	14.311	14.6211	13.3655	13.8759	15.866	13.5581	14.7423	15.1377	14.031	14.501	12.8825	13.0628	13.4967	13.0517	14.3661	14.1119	14.3692	14.4794	13.8048	13.2037
83767	Wasf1	No_BS	No_BS	No_BS	17.2417	12.3548	11.4294	16.9774	13.8961	9.66694	15.2895	13.7474	10.6261	15.8612	15.3575	12.4913	16.1436	10.957	14.7139	17.6626	14.3472	14.7627	13.6753	13.5135	13.221	14.57	13.9381	15.5908
140741	Gpr6	chr10-47 (-27623)	Merged-chr10-41071966-1 (+319)	Merged-chr10-41273226-1 (-200941)	0	0	0	0	0	0	0	0	0	0	0	0	0	0	0	0	0	0	0	0	0	0	0	0
103199	Fig4	chr10-47 (+203333)	No_BS	Merged-chr10-41273226-1 (+30015)	23.7412	25.1106	29.1464	16.9983	18.567	21.035	18.6109	17.0847	20.2604	13.0275	15.3802	17.4026	17.6984	17.5462	17.9074	13.1136	13.8037	15.0668	25.9994	18.8668	18.652	15.2701	17.7173	13.9947
268294	Zbtb24	chr10-1 (-45957), chr10-68 (+17125)	Merged-chr10-41404420-2 (-45976), Merged-chr10-41467437-2 (+17041)	Merged-chr10-41404439-2 (-45957)	4.28802	5.19858	5.69599	3.73713	4.00972	5.09358	4.14871	3.60854	4.9569	3.66491	3.58262	4.74619	4.53705	3.56875	4.36456	3.42596	3.07368	3.53372	5.06086	4.28014	4.23805	3.99791	4.15679	3.34445
171580	Mical1	chr10-68 (-8793)	Merged-chr10-41467437-2 (-8877)	No_BS	8.16182	6.34115	9.40814	6.96445	6.39846	8.09765	6.68945	5.8686	8.37475	5.26717	4.77824	6.71997	5.95943	5.75395	6.67411	5.34403	6.45947	5.74267	7.97037	7.15352	6.9776	5.58846	6.12916	5.84872
20598	Smpd2	No_BS	No_BS	No_BS	9.48595	9.94369	10.0539	8.53389	9.1989	7.80431	8.61848	9.14797	7.67483	6.71575	8.18549	6.41303	7.42893	9.78456	8.2883	7.49028	8.96042	7.01451	9.82786	8.51237	8.48043	7.10475	8.5006	7.82174
73075	Ppil6	No_BS	No_BS	No_BS	0.193668	0.147403	0.168658	0.204197	0.156952	0.141918	0.139876	0.101958	0.309366	0.1512	0.0415433	0.160696	0.151948	0.206913	0.216188	0.116817	0.191195	0.0875175	0.16991	0.167689	0.183733	0.117813	0.191683	0.131843
53599	Cd164	chr10-53 (+25191)	Merged-chr10-41544670-2 (+25170), Merged-chr10-41553058-1 (+33558), Merged-chr10-41671481-1 (+151981)	Merged-chr10-41552878-2 (+33378)	56.2973	60.5943	81.2088	64.7973	62.087	95.565	53.4148	52.0802	85.4039	60.6547	62.7816	84.3317	54.5432	59.5032	78.3387	75.9093	69.1085	108.6	66.0335	74.1498	63.633	69.256	64.1284	84.5393
75973	Ccdc162	chr10-53 (+164609)	Merged-chr10-41671481-1 (+37819), Merged-chr10-41553058-1 (+156242), Merged-chr10-41544670-2 (+164630)	Merged-chr10-41552878-2 (+156422)	0.282204	0.260224	0.241035	0.716074	0.606945	0.62039	0.199901	0.239995	0.297227	0.44488	0.36321	0.324219	0.183942	0.222649	0.261709	0.955853	0.750078	0.721015	0.261155	0.647803	0.245708	0.377437	0.222766	0.808982
70538	5730435O14Rik	No_BS	No_BS	No_BS	0	0	0	0	0	0	0	0	0	0	0	0	0	0	0	0.0675279	0	0	0	0	0	0	0	0.0225093
103268	Cep57l1	No_BS	No_BS	No_BS	12.3565	12.4386	18.6172	12.9193	12.0484	18.1519	10.8003	9.21691	15.096	11.6915	9.75807	12.5519	10.7072	10.6293	13.6835	10.0365	8.51339	13.0834	14.4708	14.3732	11.7044	11.3338	11.6733	10.5445
140742	Sesn1	No_BS	No_BS	No_BS	4.34434	4.39294	5.83711	4.9451	4.58953	6.83692	3.94451	3.26729	5.11268	4.17905	3.70095	5.99926	3.45716	3.39488	4.76638	3.54381	3.61489	5.41277	4.85813	5.45718	4.10816	4.62642	3.8728	4.19049
213402	Armc2	chr10-8 (-145482)	Merged-chr10-42170277-1 (-151897), Merged-chr10-42163742-2 (-145362)	Merged-chr10-42163760-2 (-145380)	0.0993884	0.0810487	0.139104	0.0449108	0.0345198	0.0312132	0.0692192	0.074748	0.0874818	0.0166273	0.0365479	0.0530147	0.0601544	0.0364064	0.0475481	0.0171283	0.0280341	0.0384969	0.106514	0.0368813	0.0771497	0.0353966	0.0480363	0.0278864
56484	Foxo3	chr10-123 (-79962), chr10-8 (+112890)	Merged-chr10-42170277-1 (+106475), Merged-chr10-42163742-2 (+113010)	Merged-chr10-42163760-2 (+112992)	8.60747	5.1045	4.98166	6.42843	4.95562	4.01225	7.4471	7.36361	3.6993	7.34999	5.81606	4.37449	6.33678	5.14982	6.37356	5.13418	4.9569	2.3338	6.23121	5.1321	6.17	5.84685	5.95339	4.14163
215951	Lace1	chr10-123 (+121851)	No_BS	No_BS	3.94439	4.1266	4.29078	3.94975	4.64455	4.37087	3.6181	4.18203	4.91141	3.75006	5.23581	3.98558	3.72655	5.67367	3.66359	4.22781	4.21965	4.08038	4.12059	4.32172	4.23718	4.32382	4.3546	4.17595
54198	Snx3	No_BS	No_BS	No_BS	80.136	96.5567	70.6392	75.5958	95.7081	69.1441	82.2518	86.119	56.0803	74.0188	81.5426	67.8662	75.8961	107.016	55.6717	73.6772	87.2591	57.9748	82.444	80.1493	74.8171	74.4758	79.5281	72.9704
21907	Nr2e1	No_BS	No_BS	No_BS	0	0	0	0.0096545	0	0	0	0.011248	0.0146269	0	0	0.013296	0.0100578	0.013696	0	0.0128873	0	0	0	0.00321817	0.00862498	0.00443201	0.00791794	0.00429577
14628	Ostm1	No_BS	Merged-chr10-42679050-1 (+134)	No_BS	5.63573	7.16794	8.83129	5.81937	6.33469	10.867	5.45895	6.98535	11.6925	6.08907	7.03185	8.31436	6.34342	9.6093	9.91708	6.53564	7.67141	10.5968	7.21165	7.67369	8.04561	7.14509	8.62327	8.26794
140740	Sec63	No_BS	No_BS	No_BS	9.02372	7.19052	8.78835	9.68679	7.22483	8.15652	7.86548	7.80109	8.1062	9.01854	7.89247	8.63	8.23162	7.8399	7.96894	9.98792	7.99276	9.23707	8.3342	8.35605	7.92426	8.51367	8.01349	9.07258
268297	Scml4	No_BS	No_BS	No_BS	0.138296	0.141267	0.0665568	0.118405	0.123875	0.0746727	0.0946263	0.0613107	0.0597961	0.0767152	0.0655763	0.0543554	0.116498	0.10265	0.0585007	0.166834	0.114972	0.0690733	0.115373	0.105651	0.0719111	0.065549	0.0925496	0.11696
109205	Sobp	No_BS	No_BS	No_BS	0.173381	0.158354	0.144951	0.282045	0.12646	0.071149	0.240429	0.146044	0.142436	0.276137	0.205297	0.14674	0.0914126	0.0889142	0.204381	0.242626	0.0958534	0.14103	0.158895	0.159885	0.176303	0.209391	0.128236	0.159836
74530	9030612E09Rik	No_BS	No_BS	No_BS	0	0.0211195	0	0.0167183	0.0449756	0	0	0.0194777	0.0253288	0.0433272	0	0.0460483	0	0	0.02478	0.0446328	0.0365253	0	0.00703985	0.0205646	0.0149355	0.0297918	0.00826001	0.0270527
71365	Pdss2	No_BS	No_BS	No_BS	5.5947	6.69789	5.19801	5.50185	5.95352	4.53588	7.03753	7.55588	4.77312	6.05395	6.71914	5.27008	7.62087	9.48375	4.96584	6.48254	6.32907	5.21011	5.8302	5.33042	6.45551	6.01439	7.35682	6.00724
331623	Bend3	No_BS	No_BS	No_BS	13.5375	14.1516	11.0236	17.6318	15.9499	10.8866	19.8064	19.2014	10.9994	24.3786	21.2373	16.778	19.852	15.0721	13.1703	21.807	17.9078	13.9095	12.9042	14.8228	16.6691	20.798	16.0314	17.8748
67851	1700021F05Rik	No_BS	Merged-chr10-43527939-2 (+13055)	No_BS	29.9607	33.0634	29.2902	32.3253	33.1483	29.8181	32.6251	25.7551	31.0695	33.5999	34.8483	32.3114	32.0098	32.3959	23.1837	25.0081	29.1604	27.1129	30.7714	31.7639	29.8166	33.5865	29.1965	27.0938
12484	Cd24a	No_BS	No_BS	No_BS	17.3638	11.6163	23.4772	11.6189	8.80847	16.3057	20.5216	15.0586	37.1852	10.6906	10.917	14.6522	24.2085	23.3832	39.8953	29.6196	23.4882	55.588	17.4858	12.2444	24.2551	12.0866	29.1623	36.2319
414125	F830002L21Rik	No_BS	No_BS	No_BS	0	0	0	0	0	0	0	0	0	0	0	0	0	0	0	0	0	0	0	0	0	0	0	0
69443	1700027J07Rik	No_BS	No_BS	No_BS	0	0	0	0	0	0.0477523	0	0	0	0	0	0	0	0	0	0	0	0	0	0.0159174	0	0	0	0
71018	4933404K13Rik	No_BS	No_BS	No_BS	0.0415614	0.0474491	0	0	0	0	0.0450263	0	0	0	0	0.0517281	0	0	0	0	0.0410306	0	0.0296701	0	0.0150088	0.0172427	0	0.0136769
76563	Qrsl1	No_BS	No_BS	No_BS	10.5366	13.8506	16.8097	10.3462	13.8741	17.2408	10.6363	12.0724	15.3148	10.9019	12.6134	14.4669	10.993	12.5645	13.2452	10.1941	11.2847	15.7578	13.7323	13.8204	12.6745	12.6607	12.2676	12.4122
170728	Rtn4ip1	chr10-79 (+90485)	Merged-chr10-43992330-2 (+90523)	No_BS	8.6083	8.92834	7.26457	8.48122	9.5772	8.18437	7.43065	7.84389	7.01162	7.54376	8.11189	8.01753	8.13737	8.27359	6.53381	6.77873	8.91013	6.29841	8.26707	8.7476	7.42872	7.89106	7.64826	7.32909
11630	Aim1	chr10-69 (-109801), chr10-79 (+12554)	Merged-chr10-43992330-2 (+12516)	No_BS	0.358601	0.170141	0.164257	0.227279	0.192487	0.129683	0.262362	0.357961	0.286947	0.316325	0.221777	0.179688	0.504238	0.406013	0.461645	0.601149	0.432182	0.258859	0.231	0.18315	0.302423	0.239264	0.457299	0.43073
70365	Speer5-ps1	No_BS	No_BS	No_BS	0.0226922	0.0518137	0.177856	0.0820315	0.0827557	0.166286	0	0	0.155351	0.0531484	0	0.112973	0	0	0.212779	0	0	0.0307634	0.0841205	0.110358	0.0517836	0.0553737	0.0709265	0.0102545
11793	Atg5	chr10-69 (-153711)	No_BS	No_BS	19.5595	22.9171	30.8254	20.9546	21.0459	39.2759	18.0562	16.5899	37.5576	18.039	20.1278	33.5006	17.9727	21.4619	35.7211	17.6437	16.3234	39.2969	24.434	27.0921	24.0679	23.8892	25.0519	24.4213
100316688	Mir1929	No_BS	No_BS	No_BS	0	0	0	0	0	0	0	0.39102	0	0	0	0	0	0	0	0	0	0	0	0	0.13034	0	0	0
12142	Prdm1	chr10-9 (-272202), chr10-153 (-148609)	Merged-chr10-45000231-2 (-541544), Merged-chr10-44730921-2 (-272234)	Merged-chr10-44730881-2 (-272194)	1.73185	2.24991	2.97306	3.64002	5.00913	4.74569	1.29395	1.11784	3.65228	2.91397	2.10087	5.02124	1.5743	1.01234	2.3821	2.7056	1.31014	4.11996	2.31827	4.46495	2.02136	3.34536	1.65625	2.7119
19072	Prep	chr10-153 (-459910), chr10-9 (-336317)	Merged-chr10-44730921-2 (-336285), Merged-chr10-45000231-2 (-66975)	Merged-chr10-44730881-2 (-336325)	41.2824	42.0695	39.2753	42.9451	45.5362	43.3385	31.7885	32.152	27.3228	32.0265	35.2472	35.603	32.3374	29.9972	28.8408	33.344	31.7765	26.6397	40.8757	43.94	30.4211	34.2923	30.3918	30.5867
78977	Popdc3	No_BS	No_BS	No_BS	0.261224	0.319532	0.43873	0.30353	0.272186	0.218768	0.222358	0.196461	0.383215	0.305912	0.168103	0.44124	0.298641	0.382749	0.399908	0.202584	0.239467	0.556499	0.339828	0.264828	0.267345	0.305085	0.360433	0.33285
23828	Bves	No_BS	No_BS	No_BS	0.730725	0.539804	0.47727	0.776926	0.705406	0.50397	1.09433	0.362065	0.529682	1.05708	0.746849	0.74898	0.991488	0.68885	0.37426	0.985226	0.572871	0.874085	0.582599	0.662101	0.662026	0.85097	0.684866	0.810727
380669	Lin28b	No_BS	No_BS	No_BS	10.6687	8.7574	9.16015	11.8544	9.63559	8.97492	10.6163	9.81307	12.0957	12.8607	11.4358	10.8917	10.9773	7.60525	12.0734	10.634	9.27665	11.621	9.52875	10.155	10.8417	11.7294	10.2187	10.5105
209462	Hace1	chr10-61 (+222378)	No_BS	No_BS	8.25797	7.18807	9.34504	9.07115	8.66316	11.755	8.20501	6.39868	11.969	8.9868	7.89202	10.6528	7.5085	7.29994	10.1329	9.44473	7.43185	11.6529	8.26369	9.82978	8.85756	9.17722	8.31379	9.50982
320363	D030045P18Rik	No_BS	No_BS	No_BS	0.0182545	0	0	0.0164974	0	0.0535068	0	0.0384407	0	0	0	0	0	0	0	0	0	0.0247473	0.00608483	0.0233347	0.0128136	0	0	0.00824909
100302593	Snord14d	No_BS	No_BS	No_BS	0	0	0	0	0	0	0	0	0	0	0	0	0	0	0	0	0	0	0	0	0	0	0	0
108637	Snord14c	No_BS	No_BS	No_BS	0	0	0	0	0	0	0	0	0	0	0	0	0	0	0	0	0	0	0	0	0	0	0	0
100418235	C130030K03Rik	No_BS	No_BS	No_BS	0	0	0	0	0	0	0	0	0	0	0	0	0	0	0	0	0	0	0	0	0	0	0	0
14806	Grik2	chr10-59 (+371184)	Merged-chr10-49417619-2 (+371147)	No_BS	0.00708897	0.0161865	0.0277808	0.0384397	0.00861756	0.0311684	0.0153599	0.0149281	0.0582374	0.0415086	0.0273715	0.0441154	0.0333711	0.00908853	0.0189919	0.0427593	0.0419907	0.0384416	0.0170187	0.0260752	0.0295085	0.0376652	0.0204838	0.0410639
77987	Ascc3	No_BS	Merged-chr10-50592714-1 (+45)	No_BS	9.79263	8.83844	9.55782	9.6891	8.30486	9.5115	9.07272	8.46261	9.86	10.1913	8.46579	8.65241	9.52411	7.52695	8.07476	9.06627	7.17771	7.83391	9.39629	9.16849	9.13178	9.10316	8.37527	8.02596
20464	Sim1	No_BS	No_BS	No_BS	0.00939157	0.016083	0	0.0169751	0.00570833	0.0137641	0.0203491	0.00988848	0.0192884	0.0109982	0.0120874	0	0.0132631	0.0481624	0.0125804	0.0169944	0.0139074	0.00636599	0.00849153	0.0121492	0.0165087	0.0076952	0.0246686	0.0124226
14727	Lilr4b	No_BS	No_BS	No_BS	0	0	0	0	0.0282345	0	0	0	0	0	0.0298933	0	0	0	0.0311125	0	0	0	0	0.00941151	0	0.00996444	0.0103708	0
14728	Lilrb4a	No_BS	No_BS	No_BS	0	0	0	0	0	0	0	0	0	0	0	0	0.0216778	0	0	0	0	0	0	0	0	0	0.00722595	0
77296	Fam162b	No_BS	No_BS	No_BS	0.186689	0.0710454	0	0.0562396	0	0	0.0674177	0.196567	0.255615	0	0.0800925	0	0.175766	0.0797825	0.0833591	0	0.184305	0.253091	0.0859115	0.0187465	0.1732	0.0266975	0.112969	0.145799
210198	Gprc6a	No_BS	No_BS	No_BS	0.0241859	0.0276122	0.0473908	0	0	0.0177232	0.0131011	0	0.0331154	0.0141618	0.0311284	0	0.0455417	0.0465119	0.080995	0.0437654	0.0119385	0.0327884	0.033063	0.00590773	0.0154055	0.0150967	0.0576828	0.0294975
320995	Rfx6	No_BS	No_BS	No_BS	0.24263	0.149155	0.0243805	0.050602	0.0113442	0.0136767	0.101099	0.186688	0.229991	0.0109284	0.0720638	0.0464589	0.28115	0.275175	0.275011	0.0562884	0.110553	0.0759068	0.138722	0.0252076	0.172593	0.0431504	0.277112	0.0809161
71090	4933411G06Rik	No_BS	No_BS	No_BS	0	0	0	0	0	0	0	0	0	0	0	0	0	0	0	0	0	0	0	0	0	0	0	0
215031	Vgll2	No_BS	No_BS	Merged-chr10-52029613-2 (+7111)	0.0209318	0	0	0.0567509	0.0254453	0.0306772	0	0.0220393	0.0286599	0.0735381	0.0538804	0.104209	0.0394143	0	0.056078	0.555529	0.165316	0.113507	0.00697727	0.0376245	0.0168997	0.0772091	0.0318307	0.278118
19886	Ros1	No_BS	No_BS	Merged-chr10-52029613-2 (+165631)	0.0046666	0.00532768	0	0.00843481	0.00567285	0	0	0.00491351	0.00638951	0	0	0	0	0.0119658	0	0	0.004607	0	0.00333143	0.00470255	0.00376767	0	0.00398859	0.00153567
66686	Dcbld1	No_BS	No_BS	No_BS	9.75042	13.6604	10.619	7.27443	9.61832	8.81831	8.26263	13.993	7.76943	4.73318	8.03798	6.76409	7.69653	18.1216	10.0023	3.71883	9.85133	5.10784	11.3433	8.57036	10.0083	6.51175	11.9401	6.226
94221	Gopc	No_BS	No_BS	No_BS	5.65624	5.05094	5.29855	5.38654	4.23057	4.56108	5.37374	5.34059	4.63358	5.44339	5.18959	4.39121	5.8827	5.65158	5.37982	5.94521	4.79419	5.06505	5.33524	4.72606	5.11597	5.00806	5.63803	5.26815
66650	Nepn	No_BS	No_BS	No_BS	0	0.0216293	0	0.0171218	0.0230306	0	0.0205249	0	0	0	0	0.0235799	0	0.0485785	0	0	0	0.0513679	0.00720976	0.0133841	0.00684162	0.00785995	0.0161928	0.0171226
52014	Nus1	No_BS	No_BS	No_BS	21.9471	24.2785	27.7404	22.3308	21.6657	30.5855	22.7793	21.3508	27.0778	22.3443	21.9848	27.4928	23.193	24.0494	28.8876	19.3243	19.8711	27.125	24.6553	24.8607	23.736	23.9407	25.3767	22.1068
22639	Zfa-ps	No_BS	No_BS	No_BS	0.0403947	0.0461172	0.0131918	0.0638863	0.0859337	0.0444013	0.0328218	0.021266	0.0138271	0.0236526	0.0389924	0.0377071	0.0285235	0.0258943	0.0405827	0.073096	0.069788	0.0410718	0.0332346	0.0647404	0.0226383	0.0334507	0.0316669	0.0613186
215085	Slc35f1	chr10-89 (+52357)	Merged-chr10-52742906-2 (+52373)	No_BS	0.31947	0.174435	0.172372	0.35776	0.177293	0.203569	0.323532	0.402186	0.523001	0.243993	0.402234	0.224741	0.405397	0.373965	0.530277	0.27648	0.178264	0.310702	0.222092	0.246207	0.416239	0.290323	0.436546	0.255149
100038725	Cep85l	No_BS	No_BS	No_BS	0.949749	0.454231	0.285014	1.1715	0.514863	0.432628	0.834266	0.91892	0.456897	1.30762	0.644222	0.527143	0.966682	0.592365	0.378229	1.03736	0.899608	0.243592	0.562998	0.706331	0.736694	0.826328	0.645759	0.726853
100502820	Gm19395	No_BS	No_BS	No_BS	0	0	0	0	0	0	0	0	0	0.061468	0	0	0.0494176	0	0	0	0	0	0	0	0	0.0204893	0.0164725	0
18821	Pln	chr10-89 (-594796)	Merged-chr10-52742906-2 (-594780)	No_BS	0.0139264	0	0	0.0125859	0	0.0204103	0.0150874	0	0	0	0	0	0	0.0178546	0	0.0168003	0	0	0.00464214	0.0109987	0.00502914	0	0.00595152	0.00560009
100502868	Gm20597	No_BS	No_BS	No_BS	0.0377734	0.050312	0.00822385	0.0341374	0.00765307	0.0645866	0.0204613	0.0265147	0.0948189	0.0294903	0.0162054	0.0235068	0.0296361	0.0403566	0.0168663	0.0531631	0.0248607	0.0341391	0.0321031	0.035459	0.047265	0.0230675	0.028953	0.0373876
71567	Mcm9	No_BS	No_BS	No_BS	3.66509	3.31894	3.33157	4.07792	3.34967	3.54178	3.49726	3.10787	2.79606	4.14589	3.08738	3.66264	3.70253	2.73244	3.0819	3.98036	3.4158	2.28488	3.43853	3.65646	3.13373	3.63197	3.17229	3.22701
66403	Asf1a	No_BS	No_BS	No_BS	34.1259	31.696	61.6365	28.9958	26.1491	68.1317	39.4574	26.832	67.2922	31.6783	27.665	53.4076	38.1945	26.7056	69.0784	29.7878	23.1424	66.6063	42.4861	41.0922	44.5272	37.5836	44.6595	39.8455
75906	Fam184a	No_BS	No_BS	No_BS	0.909341	0.489134	0.593932	0.979851	0.457049	0.307549	1.0041	1.12317	1.10141	1.1673	0.731478	0.51148	1.22658	0.695017	1.07755	1.28686	0.785512	0.889022	0.664136	0.581483	1.07623	0.80342	0.999716	0.987131
17155	Man1a	No_BS	No_BS	No_BS	1.07458	0.953057	0.719258	0.762467	0.63695	0.520622	1.26038	1.94495	0.899812	0.748807	1.3716	0.641089	1.32943	2.65289	1.14204	0.974926	2.20062	0.710334	0.915631	0.640013	1.36838	0.920499	1.70812	1.29529
100502920	Gm16998	No_BS	No_BS	No_BS	0	0.0320571	0.0366797	0	0	0	0.0608404	0.029565	0.0768923	0.0328829	0.0361393	0	0.0264364	0.0719989	0	0.0338737	0.0277207	0.0380665	0.0229123	0	0.0557659	0.0230074	0.0328118	0.0332203
544696	Tbc1d32	No_BS	No_BS	No_BS	1.98475	1.53603	1.9258	1.83682	1.46155	1.58027	1.69536	1.68286	1.8683	1.62588	1.33864	1.47859	1.90456	1.65153	1.78948	1.55401	1.51665	1.313	1.81553	1.62621	1.74884	1.48104	1.78185	1.46122
73390	Msl3l2	No_BS	No_BS	No_BS	1.77529	1.75041	2.31905	2.27534	1.68724	1.9632	2.55274	2.00517	2.718	2.5704	1.59942	2.67157	2.71986	2.02774	2.31322	2.58944	1.86415	2.6474	1.94825	1.97526	2.4253	2.28046	2.35361	2.367
14609	Gja1	No_BS	No_BS	No_BS	61.2442	49.7671	48.1238	59.179	46.2305	44.6346	64.7715	79.1127	65.6865	64.427	75.9896	55.9304	79.1399	102.691	80.564	56.1568	74.8584	62.9418	53.045	50.0147	69.8569	65.449	87.4649	64.6523
74928	4930467K11Rik	No_BS	No_BS	No_BS	0	0.109074	0.0624011	0.129515	0	0.0700103	0.103504	0.100594	0.196219	0.111884	0.122964	0.11891	0.0899496	0	0.127979	0	0.0943193	0.518084	0.0571583	0.0665083	0.133439	0.117919	0.0726428	0.204134
15500	Hsf2	chr10-62 (+22)	No_BS	No_BS	18.9739	21.1958	23.0654	23.145	27.8991	31.5322	20.784	20.8096	29.729	30.5619	29.4704	36.1358	20.244	25.8113	26.21	23.3818	24.0742	34.3443	21.0784	27.5254	23.7742	32.0561	24.0884	27.2668
56442	Serinc1	No_BS	No_BS	No_BS	27.3852	38.3479	50.7908	34.1087	40.3509	59.7806	33.7246	35.4678	48.4554	39.5606	41.4241	46.5259	36.7424	46.0948	41.5865	40.8829	40.4229	54.3543	38.8413	44.7467	39.2159	42.5035	41.4745	45.22
18768	Pkib	chr10-19 (+43933)	No_BS	Merged-chr10-57675977-2 (+43996)	0.0114381	0.0326463	0.0298831	0.201574	0.132093	0.0419088	0.0247835	0.0722601	0.0783057	0.120554	0.2061	0.163716	0.0269223	0.0733222	0.0459656	0.0275971	0.0903366	0.031013	0.0246559	0.125192	0.0584497	0.163457	0.0487367	0.0496489
12140	Fabp7	chr10-19 (-108967)	No_BS	Merged-chr10-57675977-2 (-108904)	0.0906496	0.103491	0.118415	1.31078	0.27549	0.531417	0.196414	0.0954459	0.186176	0.690023	0.525016	0.394885	0.256038	0.0581093	0.182143	0.218712	0.134238	0.184338	0.104185	0.705896	0.159345	0.536641	0.16543	0.179096
57319	Smpdl3a	No_BS	Merged-chr10-58224086-1 (+429712)	Merged-chr10-58223996-1 (+429622), Merged-chr10-58224681-1 (+430307)	0.269975	0.0660472	0.277095	0.644825	0.351631	0.734815	0.271591	0.243651	0.448861	0.429075	0.645302	0.744036	0.326802	0.271955	0.464968	1.2097	0.533054	1.01957	0.204372	0.57709	0.321367	0.606138	0.354575	0.920773
664783	Dux	No_BS	Merged-chr10-58231904-1 (-6198), Merged-chr10-58224086-1 (+1620)	Merged-chr10-58232507-1 (-6801), Merged-chr10-58231933-1 (-6227), Merged-chr10-58224681-1 (+1025), Merged-chr10-58223996-1 (+1710)	1.55205	1.24619	1.93832	1.5568	1.72086	1.9747	1.05321	0.592613	0.980804	1.09853	0.548782	1.31612	1.18827	0.41546	1.3251	1.09048	0.572483	0.901754	1.57885	1.75079	0.875544	0.987811	0.976276	0.854907
245263	Gm4981	No_BS	Merged-chr10-58239550-1 (-2890), Merged-chr10-58231904-1 (+4756)	Merged-chr10-58239531-1 (-2871), Merged-chr10-58232507-1 (+4153), Merged-chr10-58231933-1 (+4727)	0.476248	0.326229	0.298617	0.447622	0.301049	0.251272	0.247657	0.100289	0.286915	0.133853	0.122591	0.403069	0.179353	0.170963	0.331735	0.505584	0.131646	0.309907	0.367031	0.333314	0.21162	0.219837	0.22735	0.315713
70297	Gcc2	chr10-90 (+113514)	No_BS	No_BS	6.19564	5.13543	6.58274	5.89648	4.42997	5.232	6.36736	4.81998	5.63602	5.52242	3.9529	4.60825	6.02292	3.88999	5.3576	5.8424	3.97992	4.69585	5.97127	5.18615	5.60778	4.69452	5.09017	4.83939
110829	Lims1	chr10-90 (-25362)	No_BS	No_BS	14.2316	17.5405	17.6867	17.0057	18.9318	20.1507	14.7365	14.6313	18.9213	17.0674	17.3901	17.9391	15.2087	16.3997	16.8915	17.3202	16.2581	19.9568	16.4862	18.6961	16.0964	17.4655	16.1666	17.8451
19386	Ranbp2	No_BS	No_BS	No_BS	37.4022	26.6017	35.6081	36.6842	24.209	39.4427	31.8651	28.3444	39.0597	33.8558	26.8556	30.9014	33.1688	23.5228	39.5219	34.3439	26.2308	38.1057	33.204	33.4453	33.0897	30.5376	32.0712	32.8935
76138	Ccdc138	No_BS	Merged-chr10-58540802-2 (+42832)	No_BS	2.94115	2.54234	3.09189	3.43014	2.72407	3.48944	3.48981	2.96405	4.08455	4.75642	4.32617	4.49733	3.66572	3.89643	3.73341	5.00112	4.38303	5.3923	2.85846	3.21455	3.5128	4.52664	3.76519	4.92548
13608	Edar	No_BS	Merged-chr10-58540802-2 (+134852)	No_BS	0.0187704	0.0107147	0.0245196	0.0339272	0.0114089	0.0137547	0.0203352	0.0197635	0.0385506	0.0219815	0.0241583	0.023362	0.00883608	0.0360973	0.0125718	0.0226439	0.00926533	0.0127233	0.0180016	0.0196969	0.0262165	0.0231673	0.0191684	0.0148775
103505	BB019430	No_BS	No_BS	No_BS	0	0	0	0	0	0	0	0	0	0	0	0	0	0	0	0	0	0	0	0	0	0	0	0
237353	Sh3rf3	chr10-70 (+111569), chr10-159 (+346361)	No_BS	Merged-chr10-58925057-2 (+111599)	0.155332	0.0750272	0.0780419	0.0701901	0.0581003	0.0875583	0.213589	0.251617	0.220861	0.286851	0.184541	0.178458	0.208116	0.214465	0.208073	0.288287	0.253615	0.0971912	0.1028	0.0719496	0.228689	0.216617	0.210218	0.213031
103080	2017-09-10	chr10-159 (+62028), chr10-70 (+296820)	No_BS	Merged-chr10-58925057-2 (+296790)	11.699	12.6729	12.5455	13.9012	15.2183	16.2113	11.9412	10.7012	15.1096	14.5691	14.0355	13.5243	11.1616	16.1835	12.4115	13.5952	15.5065	15.525	12.3058	15.1103	12.584	14.0429	13.2522	14.8756
268301	Sowahc	No_BS	No_BS	No_BS	1.76821	1.80897	2.01982	2.21369	1.69353	2.2549	1.86587	1.62804	2.25334	2.15138	1.86199	2.10548	1.7152	1.8646	2.09174	2.4563	1.97989	2.37637	1.86567	2.05404	1.91575	2.03962	1.89051	2.27085
18451	P4ha1	No_BS	Merged-chr10-59289270-1 (-34026)	No_BS	6.4069	11.5179	3.43699	6.66258	11.0492	4.64484	7.77397	25.1937	3.46215	7.89311	19.5925	4.28479	7.06956	51.9896	2.87221	6.36873	32.2495	3.21951	7.12061	7.45219	12.1433	10.5901	20.6438	13.9459
69836	Pla2g12b	No_BS	No_BS	No_BS	0.194395	0.813756	0.423227	0.234244	0.945247	0.712253	0.526503	5.32169	0.665414	0.379418	2.83555	0.322597	0.335539	13.8736	0.1302	0.547191	6.20516	0.30746	0.477126	0.630581	2.1712	1.17919	4.77979	2.35327
18302	Oit3	No_BS	No_BS	No_BS	0	0.0290355	0	0	0	0	0.0413293	0.0535565	0	0.0148917	0.0490994	0.015827	0.0239446	0.195638	0	0.0460214	0.163201	0	0.0096785	0	0.0316286	0.0266061	0.073194	0.0697407
215999	Mcu	No_BS	No_BS	No_BS	7.93689	10.1321	5.04256	8.1945	11.0663	4.65286	9.40632	8.93928	4.92317	8.66096	8.89956	6.57065	7.86879	9.11179	5.00982	9.16856	9.40263	5.1354	7.70386	7.97122	7.75626	8.04372	7.33013	7.9022
216001	Micu1	No_BS	No_BS	No_BS	7.92211	8.52993	7.5763	7.79011	8.62313	7.15802	8.67705	9.68812	6.94604	7.0474	9.07361	7.30908	8.27973	15.6357	6.44507	8.90811	11.5807	7.17304	8.00945	7.85709	8.43707	7.81003	10.1202	9.22063
56709	Dnajb12	No_BS	Merged-chr10-59895004-2 (+15429)	Merged-chr10-59879889-2 (+314)	14.2122	16.8479	12.7922	17.5771	20.448	13.2108	17.0843	17.9365	9.86294	20.4738	20.2712	13.6664	15.5435	19.2193	10.4577	20.3391	20.6808	11.8242	14.6174	17.0786	14.9612	18.1371	15.0735	17.6147
74747	Ddit4	No_BS	Merged-chr10-59895004-2 (+56766)	No_BS	31.3604	26.5364	22.4643	56.5168	38.3718	33.2243	20.2739	27.8186	32.8075	51.1995	54.687	51.2517	23.5819	34.8716	42.8048	70.966	70.3175	78.2217	26.7871	42.7043	26.9667	52.3794	33.7528	73.1684
52717	Anapc16	No_BS	No_BS	No_BS	13.5395	19.7003	20.6739	17.779	21.1661	21.9761	17.6245	18.114	15.3004	21.1208	20.8376	19.0834	18.7173	22.0897	18.8678	23.2934	19.5496	24.8378	17.9712	20.3071	17.013	20.3472	19.8916	22.5603
69090	Ascc1	No_BS	No_BS	No_BS	22.0839	32.2338	19.8991	24.4086	34.0561	19.6632	29.7817	26.7782	19.1792	27.6816	28.7328	24.544	28.8488	34.9352	18.0894	30.7865	34.2693	24.123	24.7389	26.0426	25.2464	26.9862	27.2911	29.7263
94214	Spock2	chr10-127 (+83194)	No_BS	Merged-chr10-60188517-1 (+82298)	3.85514	2.75961	1.50963	3.38838	3.1636	1.68078	2.73339	2.48006	1.58233	2.91335	3.21321	2.00931	2.66613	1.74177	1.57169	4.28886	3.78849	2.08097	2.70813	2.74426	2.26526	2.71196	1.99319	3.38611
102465546	Mir6906	No_BS	No_BS	No_BS	0	0	0	0	0	0	0	0	0	0	0	0	0	0	0	0	0	0	0	0	0	0	0	0
53374	Chst3	chr10-127 (+29847)	No_BS	Merged-chr10-60188517-1 (+30743)	0.429458	0.329015	0.310025	0.321731	0.261031	0.414082	0.318337	0.291538	0.224374	0.158819	0.116365	0.210992	0.35645	0.10867	0.204374	0.538533	0.373766	0.398353	0.356166	0.332281	0.278083	0.162059	0.223165	0.436884
19156	Psap	No_BS	Merged-chr10-60305480-2 (+27852)	No_BS	67.786	77.1147	58.3388	71.5855	82.7712	53.5808	71.9723	82.2834	52.67	75.949	80.9493	55.9464	75.3728	92.5442	53.4587	90.9672	96.1137	65.0332	67.7465	69.3125	68.9752	70.9482	73.7919	84.038
22295	Cdh23	chr10-107 (+344603)	No_BS	No_BS	0.0981963	0.0455435	0.0881877	0.0360523	0.0447638	0.040476	0.0299202	0.03231	0.0462174	0.0287488	0.0473937	0.0458315	0.0462255	0.0275393	0.0534373	0.062932	0.0363534	0.045761	0.0773092	0.0404307	0.0361492	0.040658	0.0424007	0.0483488
74048	4632428N05Rik	chr10-107 (+5036)	Merged-chr10-60305480-2 (-41371)	No_BS	0.62005	0.284783	0.269989	2.18993	1.51616	1.16986	0.32429	0.465254	0.331783	2.24514	1.13743	1.44588	0.335501	0.63961	0.458252	7.23071	1.76603	4.6474	0.391607	1.62532	0.373776	1.60948	0.477788	4.54805
100302688	Gm17455	No_BS	No_BS	No_BS	0	0	0.0526441	0.0728425	0.0489904	0.177191	0	0	0	0.141584	0.0518686	0.100318	0	0	0	0.291702	0.159143	0.218538	0.017548	0.0996745	0	0.0979235	0	0.223128
71279	Slc29a3	chr10-161 (-38418)	Merged-chr10-60801584-2 (-48802), Merged-chr10-60791156-1 (-38374)	No_BS	2.80782	2.5133	2.57437	3.17491	2.47582	2.20244	1.95653	2.66491	1.78687	2.30017	2.27347	2.05907	2.11607	2.23087	1.59806	2.26611	2.55072	1.21522	2.63183	2.61772	2.1361	2.2109	1.98167	2.01069
107449	Unc5b	chr10-27 (-177767), chr10-161 (+40381)	Merged-chr10-61009314-2 (-177733), Merged-chr10-60801584-2 (+29997), Merged-chr10-60791156-1 (+40425)	No_BS	7.85291	3.91143	2.83753	9.41125	4.07897	3.30433	6.39664	6.40895	3.91722	8.50006	7.95533	5.86873	7.16067	4.31699	5.03885	9.93505	8.93818	5.68215	4.86729	5.59818	5.57427	7.44138	5.5055	8.18512
102466158	Mir6408	No_BS	No_BS	No_BS	0	0	0	0	0	0	0	0	0	0	0	0	0	0	0	0	0	0	0	0	0	0	0	0
73616	Pldi	No_BS	No_BS	No_BS	0.0404894	0	0	0	0	0	0	0	0	0	0.0521118	0	0	0	0	0.0488449	0	0	0.0134965	0	0	0.0173706	0	0.0162816
100316671	Mir466j	No_BS	No_BS	No_BS	0	0	0	0	0	0	0	0	0	0	0	0	0	0	0	0	0	0	0	0	0	0	0	0
327760	Gm20611	No_BS	No_BS	No_BS	0.122148	0	0.0797808	0.0827931	0.148487	0.134264	0	0	0.083623	0	0	0.0380072	0.0287505	0.0391506	0.0818114	0.0368388	0.0602943	0.0413986	0.0673098	0.121848	0.0278743	0.0126691	0.0499041	0.0461772
13180	Pcbd1	chr10-27 (-79995)	Merged-chr10-61009314-2 (-80029), Merged-chr10-61146368-2 (+57025)	No_BS	3.3193	3.30983	2.63451	4.51867	5.66947	3.26365	4.0057	7.388	3.33668	3.93635	6.32702	3.50373	4.23272	11.9586	3.32068	6.58931	10.0381	6.5505	3.08788	4.48393	4.91012	4.58903	6.50401	7.72598
20397	Sgpl1	No_BS	Merged-chr10-61146368-2 (+1276)	No_BS	22.1733	17.9889	19.7513	18.4643	16.69	17.9856	17.0431	16.9785	17.0322	17.128	14.8674	14.2939	16.1125	18.558	16.9662	19.6146	15.4645	13.2641	19.9712	17.7133	17.018	15.4298	17.2122	16.1144
65971	Tbata	No_BS	No_BS	No_BS	0	0	0	0	0.0622611	0.050042	0	0.0179757	0	0.0599792	0.065919	0.0637461	0	0.0218879	0.0228692	0.0205955	0	0.0231448	0	0.0374344	0.00599191	0.0632147	0.014919	0.0145801
237360	Adamts14	No_BS	No_BS	No_BS	3.50834	2.04447	2.42625	5.33052	3.69025	3.99046	2.35839	2.28507	2.95327	8.3028	4.65248	9.39596	2.46947	1.37413	3.25491	3.78259	2.48428	3.99809	2.65969	4.33708	2.53224	7.45041	2.36617	3.42165
18646	Prf1	chr10-81 (+68217)	Merged-chr10-61366094-2 (+68258)	No_BS	0.067259	0.0191968	0.021965	0.0303924	0.040881	0	0.0182166	0.123931	0.0690683	0.0787653	0.0649241	0.062784	0.0316619	0.0431152	0.022524	0.0811387	0.083	0.0455909	0.0361402	0.0237578	0.0704053	0.0688244	0.0324337	0.0699099
27355	Pald1	chr10-81 (+17470)	Merged-chr10-61366094-2 (+17429)	No_BS	35.6688	33.6642	33.5573	39.5968	38.4876	38.7862	30.2556	26.9716	37.5743	29.3834	24.6178	38.0076	28.3247	22.005	45.3334	29.216	23.6218	34.6289	34.2968	38.9569	31.6005	30.6696	31.8877	29.1555
18119	Nodal	No_BS	No_BS	Merged-chr10-61423497-2 (+5525)	28.9462	42.0476	50.2654	37.9356	56.3004	65.4111	25.9988	24.9379	42.9077	37.1624	31.1626	57.2737	25.2494	23.5141	50.9482	25.5082	17.4064	49.8628	40.4197	53.2157	31.2815	41.8663	33.2372	30.9258
13688	Eif4ebp2	No_BS	No_BS	Merged-chr10-61423497-2 (+29172)	71.0474	66.8945	44.8129	74.2401	67.1145	42.1718	83.4442	74.2365	41.0401	85.1267	69.6886	54.5148	80.0357	57.7168	53.8542	70.5221	63.8974	36.0733	60.9183	61.1754	66.2403	69.7767	63.8689	56.8309
216011	Lrrc20	chr10-162 (-2561)	No_BS	No_BS	2.31919	1.9858	0.998371	2.48894	2.59501	1.23598	1.74165	2.12279	1.13666	2.42275	2.64571	1.37765	1.62522	2.46653	1.2356	2.46396	2.43267	1.41126	1.76779	2.10665	1.66703	2.1487	1.77578	2.10263
237362	Npffr1	No_BS	Merged-chr10-61492235-1 (-103249)	No_BS	0.05285	0.0301685	0.0690375	0	0.032123	0.038728	0.0572561	0.0278232	0.0361812	0	0	0	0	0	0.0353973	0.0637562	0	0	0.0506853	0.023617	0.0404201	0	0.0117991	0.0212521
67895	Ppa1	No_BS	No_BS	No_BS	155.9	147.589	165.134	138.792	134.891	144.565	162.555	156.127	151.346	125.501	159.502	152.514	163.188	183.869	156.661	109.966	134.222	158.694	156.208	139.416	156.676	145.839	167.906	134.294
75539	1700022H01Rik	No_BS	No_BS	No_BS	0	0.0576465	0.197877	0.0912661	0.122762	0.0740021	0.054703	0.10633	0	0.0591315	0	0.0628452	0.0475391	0.0647358	0	0.0609133	0.0498486	0.068453	0.0851746	0.0960102	0.0536777	0.0406589	0.037425	0.0597383
20224	Sar1a	No_BS	No_BS	No_BS	42.329	53.7051	56.5251	43.3287	50.0041	56.648	40.2785	43.227	50.233	38.4097	46.2451	47.81	40.6147	55.5108	43.5439	36.941	44.4354	47.2537	50.853	49.9936	44.5795	44.1549	46.5565	42.8767
71767	Tysnd1	No_BS	No_BS	No_BS	15.9694	12.419	15.4334	13.9407	10.6156	16.7175	16.5642	12.917	17.3144	15.0036	11.0059	19.2366	16.7562	10.7502	22.7274	13.141	11.0522	18.229	14.6073	13.7579	15.5985	15.082	16.7446	14.1407
71361	Aifm2	No_BS	No_BS	No_BS	3.83528	3.9578	3.73473	3.22303	3.88725	3.47475	3.44274	3.40888	3.19169	2.90483	2.88479	3.02527	2.72927	3.34617	2.77559	2.24727	2.81268	2.59296	3.84261	3.52834	3.34777	2.93829	2.95034	2.55097
404634	H2afy2	No_BS	Merged-chr10-61906618-2 (-122471)	No_BS	13.1821	12.4277	11.4089	18.4663	15.6509	12.1111	16.103	11.4616	8.59121	19.7359	13.8009	13.3459	13.1259	8.09082	9.05909	17.7348	11.9605	10.7617	12.3396	15.4094	12.0519	15.6276	10.0919	13.4857
100628583	Mir5108	No_BS	No_BS	No_BS	0	0	0	0	0	0	0	0	0	0	0	0	0	0	0	0	0	0	0	0	0	0	0	0
12817	Col13a1	chr10-91 (-31114)	Merged-chr10-62010215-1 (-31107), Merged-chr10-61906618-2 (+72490)	No_BS	1.25531	0.498485	1.0837	0.848394	0.676745	1.08786	0.863283	0.574666	0.567944	0.639159	0.252884	0.665714	0.39053	0.405847	0.789593	0.658418	0.334067	0.680722	0.945832	0.870999	0.668631	0.519252	0.528657	0.557736
69894	2010107G23Rik	No_BS	No_BS	No_BS	6.94341	6.74254	4.7957	7.30287	8.58613	5.64365	6.67926	5.44108	5.76426	6.28536	6.49693	5.04112	5.3725	6.52295	4.65049	4.95836	5.83047	4.40899	6.16055	7.17755	5.96153	5.94114	5.51531	5.06594
11925	Neurog3	chr10-92 (+3088)	No_BS	No_BS	0.448539	0.691309	0.410146	1.21609	2.26281	1.18326	0.36445	0.33059	0.245656	3.28295	3.75239	2.40052	0.232263	0.287528	0.210292	0.838705	0.309967	0.334442	0.516664	1.55406	0.313565	3.14529	0.243361	0.494371
70423	Tspan15	chr10-48 (-11260), chr10-92 (+95040)	Merged-chr10-62242481-2 (-11263), Merged-chr10-62241926-2 (-10708)	No_BS	3.11364	3.0516	2.45291	5.36812	7.18574	8.22797	2.47024	2.28983	3.25315	3.90435	3.84711	6.03355	2.28204	2.4934	2.69501	3.57126	2.96984	3.92238	2.87272	6.92727	2.67107	4.595	2.49015	3.48783
102465767	Mir7662	No_BS	No_BS	No_BS	0	0	0	0	0	0	0	0	0	0	0	0	0	0	0	0	0	0	0	0	0	0	0	0
21337	Tacr2	chr10-48 (-9960)	Merged-chr10-62241926-2 (-10512), Merged-chr10-62242481-2 (-9957)	No_BS	0.076478	0.1397	0.0999026	0.152056	0.204531	0.179335	0.0662831	0.0805246	0.0837711	0.0537369	0.177175	0.114223	0.0576028	0.17649	0.102445	0.166068	0.0755014	0.0829439	0.10536	0.178641	0.0768596	0.115045	0.112179	0.108171
15275	Hk1	No_BS	Merged-chr10-62405025-2 (-25117)	Merged-chr10-62405040-2 (-25132)	9.63587	7.73038	5.69328	14.8762	14.1253	8.18366	8.12399	8.73435	5.74723	14.1637	13.7524	12.8701	6.62739	6.84468	4.75058	12.6777	13.2333	6.88465	7.68651	12.395	7.53519	13.5954	6.07422	10.9319
70162	Hk1os	No_BS	No_BS	No_BS	0.310031	0.212371	0.161997	0.448302	0.527636	0.3635	0.201527	0.522296	0.424495	0.290456	0.399025	0.54022	0.291892	0.079496	0.249179	0.448812	0.612144	0.168122	0.228133	0.446479	0.382773	0.4099	0.206856	0.409692
216019	Hkdc1	No_BS	Merged-chr10-62405025-2 (+17466)	Merged-chr10-62405040-2 (+17451)	0.168572	1.12075	0.181345	0.143384	0.675035	0.101729	0.655305	5.53356	0.0950392	0.499333	3.59899	0.0987335	0.336091	7.67864	0.0796974	0.418681	6.05963	0.0537719	0.490224	0.306716	2.09463	1.39902	2.69814	2.17736
338359	Supv3l1	No_BS	No_BS	No_BS	24.9132	30.5378	24.2003	25.3753	28.7569	21.3906	26.2544	27.3421	18.6187	23.2353	25.2573	21.6549	26.8978	29.3281	21.3126	20.013	23.5679	18.8071	26.5504	25.1743	24.0718	23.3825	25.8461	20.796
74706	4930507D05Rik	No_BS	No_BS	No_BS	0.251869	0.251606	0.472957	0.199171	0.153089	0.299921	0.20465	0.0662988	0.237091	0.294957	0.243125	0.274296	0.133387	0.282548	0.210867	0.189903	0.0777038	0.213409	0.325477	0.217394	0.169346	0.270793	0.208934	0.160338
30930	Vps26a	No_BS	No_BS	No_BS	23.8959	26.8567	30.7849	27.3066	31.8113	36.6401	28.9256	25.1267	31.0896	30.9439	29.9349	32.5436	25.7674	34.326	27.3859	26.6106	25.2473	28.1046	27.1791	31.9193	28.3806	31.1408	29.1598	26.6542
19073	Srgn	No_BS	No_BS	No_BS	2.46696	26.8613	1.25055	2.0964	16.4716	2.37438	12.4058	77.3045	2.87363	8.32204	54.8296	3.98698	6.10123	164.372	1.18374	5.90768	82.951	1.84692	10.1929	6.9808	30.8613	22.3796	57.2188	30.2352
72320	Kif1bp	chr10-164 (+464)	No_BS	No_BS	14.7818	16.2697	16.0972	14.9752	15.4895	15.7463	14.7276	14.3429	16.3942	14.0056	13.7382	15.6329	14.8378	14.6523	17.5176	14.5456	14.7172	17.2173	15.7163	15.4037	15.1549	14.4589	15.6692	15.4933
56200	Ddx21	No_BS	No_BS	No_BS	130.832	126.246	138.211	129.36	113.411	122.312	130.647	130.401	123.033	132.935	127.89	132.275	139.96	107.342	107.443	104.377	100.851	100.337	131.763	121.694	128.027	131.034	118.248	101.855
94213	Ddx50	No_BS	No_BS	No_BS	29.454	35.4038	36.208	29.6069	32.3385	35.4342	34.1632	28.7061	37.9895	31.8308	30.4617	32.5439	34.151	34.5297	35.358	28.8179	29.2682	35.4666	33.6886	32.4599	33.6196	31.6121	34.6796	31.1843
216021	Stox1	No_BS	No_BS	No_BS	0.534429	0.381337	0.785385	0.573546	0.446646	0.587436	0.373927	0.199292	0.411605	0.325967	0.186289	0.360296	0.262063	0.25694	0.432516	0.362652	0.208843	0.40754	0.56705	0.535876	0.328274	0.290851	0.317173	0.326345
102465987	Mir7215	No_BS	No_BS	No_BS	0	0	0	0	0	0	0	0	0	0	0	0	0	0	0	0	0	0	0	0	0	0	0	0
67500	Ccar1	chr10-63 (-70222)	No_BS	Merged-chr10-62866867-2 (-74499)	27.1102	23.3693	41.7409	30.2023	21.1705	37.5505	31.4091	27.1965	40.3929	33.6448	26.4147	34.0203	32.4369	23.5537	36.4184	31.8673	22.4315	38.5198	30.7401	29.6411	32.9995	31.3599	30.803	30.9395
100217463	Snord98	No_BS	No_BS	No_BS	2.46696	0	1.61129	1.11475	1.49945	1.80777	0	1.29875	1.68889	0	0	3.07044	1.16131	0	8.26149	1.48803	2.43546	1.67221	1.35942	1.47399	0.995877	1.02348	3.14093	1.86523
52463	Tet1	chr10-63 (+36528)	No_BS	Merged-chr10-62866867-2 (+32251)	48.6399	30.8313	43.418	51.3922	30.8878	39.1906	46.5731	40.5302	39.8237	61.6713	32.27	39.0391	44.0092	16.137	34.6046	24.9568	19.6511	21.7584	40.9631	40.4902	42.309	44.3268	31.5836	22.1221
73132	Slc25a16	No_BS	No_BS	No_BS	9.53327	11.5742	12.3096	9.45035	10.1319	11.6834	10.8284	9.57458	10.8248	10.8422	9.15633	11.5779	9.96933	9.65658	11.312	9.07312	8.52139	10.703	11.139	10.4219	10.4092	10.5255	10.3126	9.4325
327762	Dna2	No_BS	No_BS	No_BS	21.5252	18.8159	18.8038	20.3543	19.5868	17.0567	20.7054	20.4497	19.8126	18.0054	17.0817	18.4792	19.7767	18.0791	20.1017	17.5473	17.5445	16.9931	19.715	18.9993	20.3226	17.8555	19.3192	17.3616
70432	Rufy2	No_BS	No_BS	No_BS	3.32389	2.83283	3.80679	3.52788	2.92239	3.99909	2.98966	2.99921	4.65691	3.79747	3.05429	3.71366	3.23858	3.00283	3.46879	3.59484	3.57524	3.90357	3.32117	3.48312	3.54859	3.52181	3.23673	3.69122
432467	Hnrnph3	No_BS	No_BS	No_BS	4.76324	3.65566	3.20474	5.5285	4.10552	3.43209	4.9705	3.37147	3.16276	5.42886	4.98232	3.98533	4.81452	3.53336	3.64908	5.97681	5.53595	3.52028	3.87455	4.35537	3.83491	4.79884	3.99899	5.01101
67307	Pbld2	No_BS	No_BS	No_BS	0.218691	0.178336	0.122432	0.239991	0.208879	0.251828	0.219999	0.213814	0.21388	0.219517	0.0603139	0.272187	0.117655	0.120161	0.125548	0.207287	0.154213	0.232944	0.173153	0.233566	0.215898	0.184006	0.121121	0.198148
68371	Pbld1	No_BS	No_BS	No_BS	0.568811	0.284108	0.0928791	0.449801	0.108041	0.208409	0.423659	0.0935792	0.267718	0.312244	0.160144	0.221236	0.368178	0.250681	0.166675	0.321652	0.140387	0.192782	0.315266	0.255417	0.261652	0.231208	0.261844	0.218274
53404	Atoh7	chr10-93 (+57420)	Merged-chr10-63157606-2 (+57450)	No_BS	0.07675	0	0.100258	0.138724	0	0.112483	0.0831485	0	0.210172	0	0.0987808	0	0.0722595	0	0.10281	0.370353	0.15154	0.624291	0.0590026	0.0837359	0.0977736	0.0329269	0.0583564	0.382061
68802	Mypn	chr10-93 (+46376)	Merged-chr10-63157606-2 (+46346)	No_BS	0.414766	0.473523	0.369803	0.45814	0.416166	0.424546	0.442212	0.36046	0.333527	0.624499	0.415196	0.671914	0.30992	0.244777	0.34394	0.222381	0.337974	0.214206	0.419364	0.43295	0.378733	0.570536	0.299545	0.258187
67345	Herc4	No_BS	No_BS	No_BS	37.758	46.9983	49.535	38.4392	40.9151	45.5469	38.6385	39.2162	50.8445	37.3347	35.7986	44.8148	39.4577	41.9684	43.1976	31.6788	35.1843	42.6874	44.7638	41.6337	42.8997	39.316	41.5412	36.5168
93759	Sirt1	No_BS	No_BS	Merged-chr10-63272249-1 (+109455)	25.3952	30.0617	41.2044	24.1162	25.1372	38.6039	28.0291	22.749	37.698	24.5572	20.3612	30.3871	24.7992	20.3164	33.4263	24.3488	18.862	37.3138	32.2205	29.2858	29.492	25.1018	26.1806	26.8415
30045	Dnajc12	No_BS	No_BS	No_BS	3.92184	4.15967	6.51125	3.3614	3.87551	6.37817	5.12597	4.4224	8.3838	3.64458	4.26603	6.32982	4.71672	5.15781	7.62599	5.25006	4.49623	10.0847	4.86425	4.53836	5.97739	4.74681	5.8335	6.61033
216033	Ctnna3	No_BS	Merged-chr10-63555790-2 (+98280)	No_BS	0	0	0	0	0	0	0	0	0	0.0103073	0	0	0	0	0.0117901	0	0	0	0	0	0	0.00343578	0.00393003	0
216028	Lrrtm3	No_BS	No_BS	Merged-chr10-64147880-2 (-57606)	0.0179322	0.0409452	0.0702742	0	0.0217989	0.0394217	0.00971361	0.0283216	0	0	0	0	0.0253246	0	0.0120105	0	0.00885161	0.0121552	0.0430505	0.0204069	0.0126784	0	0.012445	0.00700227
69433	1700023F02Rik	No_BS	No_BS	No_BS	0	0	0	0	0	0	0	0	0	0	0	0	0	0	0	0	0	0	0	0	0	0	0	0
77198	4930407I19Rik	No_BS	No_BS	No_BS	0	0	0	0	0	0	0	0	0	0	0	0	0	0	0	0	0	0	0	0	0	0	0	0
102634101	Gm31763	No_BS	No_BS	No_BS	0.235866	0.115405	0.0880313	0.152259	0.0819214	0	0.146017	0.106434	0.138406	0.236757	0	0.125813	0.0634474	0	0.361087	0.0406485	0.133059	0	0.146434	0.07806	0.130286	0.120857	0.141512	0.0579026
28193	Reep3	No_BS	Merged-chr10-67079187-2 (+17801), Merged-chr10-67019146-1 (+77842), Merged-chr10-67002818-1 (+94170), Merged-chr10-66994597-2 (+102391)	Merged-chr10-67019189-2 (+77799)	4.69212	5.4705	5.99108	4.89847	4.61454	5.25327	5.37993	5.16971	5.42756	5.7426	4.59731	4.93372	6.10495	4.77099	4.96821	5.57031	4.83493	4.50502	5.38457	4.92209	5.32574	5.09121	5.28138	4.97009
108829	Jmjd1c	No_BS	No_BS	No_BS	29.2567	23.2826	35.9335	24.1275	18.7282	28.955	31.2943	26.9516	38.4198	30.157	21.473	28.5869	33.8978	17.2425	33.2646	24.7511	18.4297	21.9796	29.4909	23.9369	32.2219	26.739	28.135	21.7201
641340	Nrbf2	No_BS	No_BS	No_BS	16.429	19.2192	16.7956	14.6382	16.8737	16.3255	18.0914	17.4608	17.5516	15.6448	15.7779	17.9009	17.1399	19.6274	18.5678	13.5311	15.0184	20.5451	17.4812	15.9458	17.7013	16.4412	18.4451	16.3649
13654	Egr2	No_BS	No_BS	No_BS	0.0815387	0.0531942	0	0.0631629	0.113281	0.0170716	0.075717	0.085853	0.063796	0.0409234	0.0899521	0.0579914	0.142569	0.104538	0.187242	0.154574	0.0804974	0.110541	0.044911	0.0645052	0.075122	0.0629556	0.144783	0.115204
211488	Ado	chr10-49 (-407)	Merged-chr10-67549380-1 (-425)	Merged-chr10-67549623-2 (-668)	10.3962	9.30535	10.6878	11.7619	10.8716	14.5077	11.8943	10.2018	12.7238	12.7753	12.0104	15.5311	10.6951	9.94167	15.4665	13.2633	11.5291	18.1705	10.1298	12.3804	11.6066	13.4389	12.0344	14.321
216049	Zfp365	No_BS	No_BS	No_BS	4.69749	6.41887	4.83272	4.27465	5.30603	2.98449	6.92611	10.3619	6.78728	6.55572	8.72946	4.81662	7.46274	10.828	9.78104	6.08772	8.16167	6.21432	5.31636	4.18839	8.0251	6.7006	9.35726	6.82124
170799	Rtkn2	chr10-94 (+109)	Merged-chr10-67979763-2 (+165), Merged-chr10-68252823-2 (+273225)	No_BS	4.4182	4.08141	2.20302	5.96953	5.4136	3.06382	4.79605	3.8751	2.77816	7.40618	7.90221	5.18194	4.4326	4.42568	2.62384	5.23458	5.33298	3.94151	3.56754	4.81565	3.81644	6.83011	3.82737	4.83636
71371	Arid5b	No_BS	Merged-chr10-68252823-2 (+25903)	No_BS	17.092	17.311	10.2701	15.419	14.2285	8.2335	17.1431	17.4461	6.98704	14.112	11.3848	7.11652	16.1788	13.3902	8.45194	14.9081	13.0043	4.26127	14.891	12.627	13.8588	10.8711	12.6736	10.7245
75148	4930545H06Rik	No_BS	No_BS	No_BS	0	0	0	0	0	0	0	0	0	0	0	0	0	0	0	0	0	0	0	0	0	0	0	0
73287	1700040L02Rik	No_BS	No_BS	No_BS	0	0	0	0	0.10174	0.0817729	0	0.0293739	0.0381977	0	0	0	0.0262656	0	0	0	0.0550831	0	0	0.061171	0.0225239	0	0.00875519	0.018361
327766	Tmem26	No_BS	No_BS	No_BS	0.0136728	0.0234146	0.0178607	0.00617835	0.016621	0.0200386	0.0148127	0.0143962	0	0.00800593	0.0263963	0.0255262	0.0128728	0.00876471	0.0183153	0.0247415	0	0	0.018316	0.0142793	0.00973631	0.0199761	0.0133176	0.00824717
69288	Rhobtb1	No_BS	No_BS	Merged-chr10-69208419-1 (-4775)	0.448151	0.136437	0.224409	0.209257	0.199754	0.0985201	0.218481	0.346033	0.143175	0.271156	0.278782	0.17663	0.246126	0.459647	0.110058	0.603706	0.449801	0.131636	0.269666	0.169177	0.235896	0.242189	0.271944	0.395048
12534	Cdk1	No_BS	No_BS	No_BS	100.11	103.566	148.978	107.532	101.82	203.62	90.677	81.3633	174.638	84.0314	89.6021	140.847	88.8072	94.0393	158.852	90.0744	90.8085	188.204	117.551	137.658	115.559	104.827	113.899	123.029
11735	Ank3	chr10-166 (+283388), chr10-167 (+306167), chr10-54 (+526423)	Merged-chr10-69817177-2 (+283405), Merged-chr10-70060231-2 (+526459)	Merged-chr10-70060207-2 (+526435)	1.52243	0.966842	0.722025	1.86372	1.54029	0.800594	1.32018	1.37496	1.03119	1.82452	1.66407	1.15461	1.28728	1.33853	0.835659	2.28893	1.99122	0.880785	1.07043	1.40154	1.24211	1.54773	1.15382	1.72031
76551	Ccdc6	chr10-166 (-279961), chr10-167 (-257182), chr10-54 (-36926)	Merged-chr10-69817177-2 (-279944), Merged-chr10-70060231-2 (-36890)	Merged-chr10-70060207-2 (-36914)	11.7005	10.2815	8.07193	11.5201	11.6713	7.4948	12.1464	12.0095	7.31084	15.5296	13.1797	9.18846	11.2992	8.83015	8.35293	14.3494	14.261	8.51306	10.018	10.2287	10.4889	12.6326	9.49408	12.3745
69563	Mrln	No_BS	No_BS	No_BS	0	0	0	0	0.0941362	0.226984	0	0	0.106029	0	0	0	0	0	0	1.96179	0.458696	1.04982	0	0.10704	0.0353429	0	0	1.15677
66859	Slc16a9	No_BS	Merged-chr10-70245340-1 (+240)	No_BS	0.319881	0.343064	0.48117	0.455536	0.471341	0.411986	0.178525	0.204125	0.358349	0.6811	0.38675	0.5791	0.282913	0.447391	0.168801	0.666542	0.334935	0.381093	0.381372	0.446288	0.247	0.548983	0.299702	0.460857
71721	Fam13c	No_BS	Merged-chr10-70520207-1 (+79281)	No_BS	2.17458	1.17954	1.40104	1.50285	1.05261	0.995044	1.98277	2.3	1.29337	1.65932	1.96295	1.44512	2.29748	1.69043	1.54214	1.72119	1.80682	1.02715	1.58505	1.1835	1.85871	1.68913	1.84335	1.51839
70911	Phyhipl	No_BS	Merged-chr10-70520207-1 (+79084)	No_BS	1.44576	1.27067	0.944289	1.65916	1.12982	1.04262	1.87706	1.57058	1.08403	1.37059	1.32911	1.22817	1.90131	1.25041	1.10665	1.09353	1.23472	1.0111	1.22024	1.2772	1.51055	1.30929	1.41946	1.11312
319646	D630013N20Rik	No_BS	No_BS	No_BS	0	0	0	0.0299837	0	0	0.0179716	0	0	0.0194265	0	0	0.015618	0	0	0	0	0	0	0.00999456	0.00599053	0.0064755	0.00520602	0
83675	Bicc1	No_BS	No_BS	No_BS	1.01352	0.40689	0.37827	0.704582	0.379095	0.27749	0.736029	0.70361	0.487985	0.704315	0.802733	0.443584	0.723527	0.713952	0.581847	1.048	0.780666	0.28688	0.599559	0.453722	0.642541	0.650211	0.673109	0.705182
319572	C730027H18Rik	No_BS	No_BS	No_BS	0.0150163	0	0	0	0	0	0	0	0	0	0	0	0	0	0	0.0181151	0	0	0.00500543	0	0	0	0	0.00603836
78638	1700113B09Rik	No_BS	No_BS	No_BS	0.0803197	0.183396	0	0.145177	0	0.23543	0.348064	0.169139	0.109974	0	0	0.199935	0.302482	0.308925	0.215183	0.387579	0.158588	0.108888	0.0879053	0.126869	0.209059	0.0666451	0.27553	0.218352
21780	Tfam	No_BS	No_BS	No_BS	28.1994	29.0141	29.5707	27.8033	25.0965	30.0242	29.6718	24.6145	30.5965	23.867	25.2662	27.8455	28.9149	28.0842	29.296	25.7666	24.8108	34.1424	28.9281	27.6414	28.2943	25.6596	28.765	28.24
216080	Ube2d1	No_BS	No_BS	Merged-chr10-71292481-2 (-7219)	18.391	20.8862	16.1106	19.1073	20.9484	17.1201	17.5449	19.6182	15.829	17.5238	20.4085	18.1136	18.6102	19.8035	16.2944	24.5446	23.5887	24.8997	18.4626	19.0586	17.664	18.682	18.236	24.3443
52637	Cisd1	No_BS	No_BS	Merged-chr10-71292481-2 (+52473)	59.519	91.2819	86.1646	58.1241	89.4949	81.2502	76.8111	71.8631	80.1214	56.331	67.6674	70.2032	69.9869	86.8608	73.975	60.7916	70.1715	91.3147	78.9885	76.2897	76.2652	64.7338	76.9409	74.0926
69718	Ipmk	chr10-168 (+132270)	No_BS	No_BS	16.6981	21.2473	22.3456	15.6497	19.1439	20.2021	18.5185	15.1582	17.7737	13.9922	13.351	15.9105	16.2614	15.0486	16.0734	16.652	14.0615	18.3069	20.097	18.3319	17.1501	14.4179	15.7944	16.3402
108950	1700049L16Rik	No_BS	No_BS	No_BS	0	0	0	0	0	0	0	0	0	0	0	0	0	0	0	0	0	0	0	0	0	0	0	0
52696	Zwint	chr10-12 (-66142)	Merged-chr10-72588760-2 (-66135)	Merged-chr10-72588723-2 (-66172)	50.2077	54.1993	79.8095	44.8724	49.0704	89.6229	50.1167	48.3369	95.5292	42.9203	45.2266	66.2726	54.3807	59.7479	82.5111	46.0134	46.2822	81.2944	61.4055	61.1886	64.6609	51.4732	65.5466	57.8633
327768	A330049N07Rik	No_BS	No_BS	No_BS	0.382013	0.23789	0.567069	0.266778	0.337735	0.432628	0.131683	0.219396	0.451728	0.427031	0.268183	0.345791	0.261573	0.222621	0.325641	0.272318	0.257137	0.564969	0.395657	0.345714	0.267602	0.347002	0.269945	0.364808
11994	Pcdh15	chr10-169 (+283896)	No_BS	No_BS	0.00216035	0	0	0	0.00262618	0	0.00234045	0	0	0.00758978	0	0	0.00203395	0	0	0	0	0	0.000720116	0.000875393	0.000780151	0.00252993	0.000677984	0
71236	Rsph14	chr10-109 (+29877)	No_BS	Merged-chr10-74990105-2 (+42481)	0	0.0322406	0.110669	0.0255217	0.0686586	0	0.0611886	0.0594683	0.115999	0.0661422	0.0363462	0.0702961	0.0797631	0	0.0378286	0.0340676	0.083638	0	0.0476365	0.0313934	0.0788852	0.0575948	0.0391972	0.0392352
14687	Gnaz	chr10-169 (-861398), chr10-108 (-46214), chr10-109 (+35532)	Merged-chr10-74920926-2 (-46251)	Merged-chr10-74935508-2 (-31669), Merged-chr10-74990105-2 (+22928)	1.87226	1.10113	0.889351	1.76895	1.32765	0.89386	2.02835	1.58303	1.06812	1.56136	1.49692	1.09451	1.85619	1.36384	1.29198	1.88218	1.83435	1.01912	1.28758	1.33015	1.55983	1.38427	1.504	1.57855
76877	Rab36	No_BS	No_BS	No_BS	0.158187	0.135447	0.0688794	0.1787	0.112173	0.115918	0.199937	0.360873	0.234639	0.29331	0.254492	0.311731	0.173754	0.422512	0.229556	0.349856	0.195208	0.214451	0.120838	0.135597	0.26515	0.286511	0.275274	0.253172
110279	Bcr	No_BS	No_BS	No_BS	4.98751	4.59627	2.80207	4.94671	4.23894	2.14487	4.14407	5.65194	1.60595	4.23826	4.24998	2.06481	4.20823	4.72123	2.56906	5.08619	5.39325	1.97687	4.12862	3.77684	3.80065	3.51768	3.83284	4.15211
74392	Specc1l	No_BS	No_BS	No_BS	10.4181	8.56832	9.17317	11.0298	9.20169	9.08095	9.65352	9.22396	7.44809	9.97014	8.85851	8.2794	9.19743	8.67979	8.33591	10.4388	8.43142	7.38909	9.38653	9.7708	8.77519	9.03601	8.73771	8.75311
11540	Adora2a	No_BS	No_BS	No_BS	0.198949	0.0151422	0.0693027	0.119866	0.177355	0.136068	0.14369	0.16758	0.14528	0.186387	0.256056	0.148569	0.049949	0.11903	0.0888332	0.352006	0.196408	0.323653	0.0944645	0.14443	0.152183	0.197004	0.0859375	0.290689
544707	Gm5779	No_BS	No_BS	No_BS	93.6358	136.419	104.16	101.072	139.008	101.067	120.79	127.738	87.0176	117.191	127.718	94.6452	124.331	145.775	82.7351	106.39	120.935	92.1466	111.405	113.716	111.849	113.185	117.614	106.49
103149	Upb1	No_BS	No_BS	No_BS	0.35196	0.298124	0.415269	0.338603	0.262232	0.482546	0.332102	0.239085	0.295361	0.252621	0.204576	0.381533	0.245853	0.3639	0.501881	0.50677	0.302631	0.584888	0.355118	0.361127	0.288849	0.279577	0.370545	0.464763
71125	4933407G14Rik	No_BS	No_BS	No_BS	0	0	0	0	0	0	0	0	0	0	0	0	0	0	0	0	0	0	0	0	0	0	0	0
68778	Gucd1	No_BS	No_BS	No_BS	5.48327	5.28446	4.41858	5.7921	5.32384	5.34005	5.72182	6.61066	6.43518	5.87926	6.38511	5.8792	5.49768	9.98186	6.10498	6.85821	8.92834	6.62907	5.0621	5.48533	6.25589	6.04785	7.19484	7.47187
67332	Snrpd3	No_BS	No_BS	No_BS	209.283	241.804	272.19	179.733	214.094	211.353	221.899	236.251	257.74	205.176	224.833	236.566	231.278	252.26	242.122	175.419	212.877	256.9	241.092	201.727	238.63	222.192	241.887	215.065
192734	Lrrc75b	No_BS	Merged-chr10-75560059-2 (+271)	No_BS	0.0750652	0.0428496	0.0196114	0.0949754	0.0456257	0.0220028	0.0406616	0.0395185	0.0513897	0.0703255	0.0676287	0.0747422	0.0353366	0.00962384	0.120663	0.0724446	0.00741065	0.0610587	0.0458421	0.0542013	0.0438566	0.0708988	0.0552079	0.0469713
14598	Ggt1	No_BS	No_BS	No_BS	3.00527	1.53076	1.73136	2.521	1.42385	1.62626	1.21884	1.49289	1.54042	0.938505	0.872762	1.72635	1.40746	1.20528	1.63092	0.762273	0.745526	0.981984	2.08913	1.85704	1.41739	1.17921	1.41455	0.829928
23887	Ggt5	No_BS	No_BS	No_BS	0.116878	0.0381244	0.11996	0.0528139	0.0608916	0.134588	0.0633111	0.114272	0.137168	0.0488832	0.0752138	0.249375	0.0471599	0.0749227	0.134197	0.0402849	0.0741764	0.0339535	0.0916543	0.0827646	0.104917	0.124491	0.0854264	0.0494716
71733	Susd2	No_BS	No_BS	No_BS	5.0082	5.14834	5.22542	2.93431	4.10173	3.01683	3.73594	3.86552	3.95163	2.26149	2.03479	2.94498	3.85606	3.99942	3.14114	3.48166	4.34716	3.15023	5.12732	3.35096	3.85103	2.41375	3.66554	3.65968
104248	Cabin1	No_BS	No_BS	Merged-chr10-75764520-1 (-163)	10.4538	9.31314	8.31562	9.98314	9.06668	6.47306	9.52976	11.6602	6.37067	10.0139	7.96668	6.62078	9.91195	7.10487	8.17378	9.3215	8.59723	5.08387	9.36087	8.50763	9.18686	8.20045	8.39687	7.66753
13202	Ddt	No_BS	No_BS	No_BS	57.2222	78.7309	55.4875	53.5593	75.0072	50.3681	67.7067	75.8348	49.5406	56.2524	72.1148	54.4208	64.8734	85.723	50.2146	52.5427	66.8491	52.3574	63.8135	59.6449	64.3607	60.9294	66.937	57.2497
103140	Gstt3	No_BS	No_BS	No_BS	3.07942	2.12624	1.87883	3.63291	3.25029	2.02686	3.33615	4.11605	2.42377	4.27565	4.12949	3.55731	4.11451	4.37356	2.84058	13.169	7.73677	6.92453	2.3615	2.97002	3.29199	3.98749	3.77621	9.27676
14871	Gstt1	No_BS	No_BS	No_BS	2.99747	3.04187	3.00193	2.49824	2.59115	2.05008	2.27315	2.66512	3.0553	1.44311	2.229	2.03117	2.69667	2.43387	2.36452	2.77229	3.25511	2.61877	3.01376	2.37982	2.66453	1.90109	2.49835	2.88206
[truncated: 22,622 more rows]
