# Supplementary material for: Intrinsic DNA binding properties demonstrated for lineage-specifying basic helix-loop-helix transcription factors
Source: HighWire-hosted journal article supplement (doi:10.1101/gr.224360.117), 2018-03-02
Supplement: Supplemental_Table_S3.xlsx [file Supplemental_Table_S3.xlsx]

## Sheet: Legend
Legend:
Public data sets sheet contain the list of public data sets used for chromHMM analysis
ASCL1, ASCL2, and MYOD1 sheets contain bHLH peaks and overlap information with 18 segments defined by chromHMM
Peak summit overlaps with chromHMM states are listed
Enrichment sheet contains overall distribution of bHLH peaks with 18 chromHMM states

## Sheet: Public datasets
Mark	GEO Accession number
H2A-Ub1	GSM850471
H2A.X	GSM1037482
H2A.Z	GSM984544
H2A.ZAc	GSM958502
H2B	GSM1692828
H3.1	GSM487542
H3K14Ac	GSM775314
H3K27me1	GSM985054
H3K27me2	GSM1234538
H3K27me3	GSM1526291
H3K36me2	GSM1019770
H3K36me3	GSM1526290
H3K4me1	GSM1359829
H4R3me2	GSM1045500
H4K20me3	GSM656527
H4K16ac	GSM1156617
H3K9me3	GSM1526292
H3K9me2	GSM1314605
H3K9me1	GSM1543627
H3K9_K14ac	GSM1294872
H3K9ac	GSM1000123
H3K79me2	GSM1526289
H3K64ac	GSM1668879
H3K56ac	GSM1148636
H3K4me3	GSM1526288
H3K4me2	GSM686995

## Sheet: ASCL1
MergedPeakID	chr	start	end	ASCL1_Peak_ID	ChromHMM_state
Merged-chr11-20145590-2	chr11	20144401	20146800	chr11-102	E13
Merged-chr11-106674995-2	chr11	106674401	106676000	chr11-105	E3
Merged-chr11-114795601-2	chr11	114795201	114796400	chr11-106	E3
Merged-chr11-53749996-2	chr11	53749801	53750400	chr11-112	E14
Merged-chr11-99785560-2	chr11	99785401	99786000	chr11-113	E5
Merged-chr11-73037062-2	chr11	73036801	73037400	chr11-120	E3
Merged-chr11-85658586-2	chr11	85658401	85658800	chr11-121	E15
Merged-chr11-43653319-2	chr11	43653201	43653600	chr11-126	E2
Merged-chr11-69655283-2	chr11	69655001	69656000	chr11-132	E2
Merged-chr11-120065344-2	chr11	120064801	120065600	chr11-133	E3
Merged-chr11-29603936-2	chr11	29603401	29604800	chr11-135	E14
Merged-chr11-61529393-2	chr11	61529201	61529600	chr11-136	E8
Merged-chr11-69362143-2	chr11	69362001	69362200	chr11-137	E4
Merged-chr11-115258304-2	chr11	115258201	115258400	chr11-138	E3
Merged-chr11-60248536-2	chr11	60248001	60248800	chr11-140	E14
Merged-chr11-82305259-2	chr11	82305001	82305800	chr11-141	E4
Merged-chr11-83233771-2	chr11	83233601	83234000	chr11-142	E15
Merged-chr11-99846937-2	chr11	99846801	99847200	chr11-143	E5
Merged-chr11-99880627-2	chr11	99874001	99889400	chr11-144	E17
Merged-chr11-60722891-2	chr11	60722601	60723200	chr11-147	E7
Merged-chr11-74536398-2	chr11	74536201	74536600	chr11-148	E3
Merged-chr11-75572595-2	chr11	75572201	75573400	chr11-149	E3
Merged-chr11-84333050-2	chr11	84333001	84333200	chr11-150	E7
Merged-chr11-98446805-2	chr11	98446401	98447000	chr11-151	E2
Merged-chr11-29775594-2	chr11	29774001	29779400	chr11-152	E6
Merged-chr11-77763789-2	chr11	77763001	77764400	chr11-153	E2
Merged-chr11-94163272-2	chr11	94162801	94164000	chr11-154	E3
Merged-chr11-117404101-2	chr11	117403801	117404600	chr11-155	E3
Merged-chr11-5840409-2	chr11	5840001	5840600	chr11-160	E4
Merged-chr11-20112962-2	chr11	20112201	20113400	chr11-161	E2
Merged-chr11-20231400-2	chr11	20231201	20231800	chr11-162	E13
Merged-chr11-60161482-2	chr11	60161401	60161600	chr11-163	E3
Merged-chr11-68556046-2	chr11	68555801	68556200	chr11-164	E3
Merged-chr11-99628082-2	chr11	99628001	99628200	chr11-165	E15
Merged-chr11-5741169-2	chr11	5740601	5741400	chr11-167	E2
Merged-chr11-6389429-2	chr11	6388601	6390000	chr11-168	E2
Merged-chr11-28171528-2	chr11	28171401	28171800	chr11-169	E14
Merged-chr11-32000421-2	chr11	32000201	32000600	chr11-170	E3
Merged-chr11-61081626-2	chr11	61080601	61082400	chr11-172	E6
Merged-chr11-62598520-2	chr11	62598401	62598800	chr11-173	E4
Merged-chr11-63533754-2	chr11	63533001	63534600	chr11-174	E14
Merged-chr11-67017944-2	chr11	67016401	67019400	chr11-175	E13
Merged-chr11-86051706-2	chr11	86051601	86052000	chr11-177	E14
Merged-chr11-95057349-2	chr11	95057001	95058200	chr11-178	E2
Merged-chr11-97568879-2	chr11	97568601	97569200	chr11-179	E3
Merged-chr11-100256434-2	chr11	100256201	100256600	chr11-180	E3
Merged-chr11-106606153-2	chr11	106606001	106606400	chr11-181	E3
Merged-chr11-117976388-2	chr11	117975801	117976800	chr11-182	E2
Merged-chr11-75165986-2	chr11	75165001	75167800	chr11-183	E2
Merged-chr11-87073950-2	chr11	87073201	87074400	chr11-184	E2
Merged-chr11-93968142-2	chr11	93967601	93968400	chr11-185	E2
Merged-chr11-98682495-2	chr11	98682201	98682600	chr11-186	E13
Merged-chr11-101601097-2	chr11	101601001	101601200	chr11-187	E4
Merged-chr11-50263305-2	chr11	50263001	50263600	chr11-189	E8
Merged-chr11-62873433-2	chr11	62873201	62873800	chr11-190	E5
Merged-chr11-69171808-2	chr11	69170801	69172800	chr11-191	E6
Merged-chr11-70652591-2	chr11	70652001	70653800	chr11-192	E12
Merged-chr11-79128343-2	chr11	79128201	79128400	chr11-193	E3
Merged-chr11-88139609-2	chr11	88139201	88139800	chr11-194	E2
Merged-chr11-101496931-2	chr11	101487001	101506400	chr11-196	E9
Merged-chr11-115441609-2	chr11	115441401	115441800	chr11-197	E2
Merged-chr11-117475165-2	chr11	117475001	117475400	chr11-199	E4
Merged-chr13-55504573-2	chr13	55504401	55504800	chr13-100	E8
Merged-chr13-59770152-2	chr13	59769201	59770600	chr13-101	E2
Merged-chr13-68573356-2	chr13	68573001	68574000	chr13-104	E8
Merged-chr13-72818088-2	chr13	72817801	72818600	chr13-105	E3
Merged-chr13-73290392-2	chr13	73290001	73290800	chr13-106	E3
Merged-chr13-99038754-2	chr13	99038401	99039400	chr13-107	E13
Merged-chr13-101235377-2	chr13	101234801	101235800	chr13-108	E14
Merged-chr13-107672415-2	chr13	107672201	107672600	chr13-109	E4
Merged-chr13-111808523-2	chr13	111807801	111808800	chr13-110	E2
Merged-chr13-112987731-2	chr13	112986601	112989200	chr13-111	E2
Merged-chr13-4126001-2	chr13	4125801	4126200	chr13-112	E15
Merged-chr13-20354919-2	chr13	20354601	20355200	chr13-117	E15
Merged-chr13-21723938-2	chr13	21723401	21725200	chr13-118	E16
Merged-chr13-45306231-2	chr13	45305401	45306600	chr13-120	E14
Merged-chr13-49112771-2	chr13	49112401	49113200	chr13-121	E5
Merged-chr13-49187656-2	chr13	49187001	49188800	chr13-122	E2
Merged-chr13-51748636-2	chr13	51748001	51749200	chr13-123	E3
Merged-chr13-54266683-2	chr13	54266601	54266800	chr13-124	E3
Merged-chr13-67301072-2	chr13	67299201	67305600	chr13-126	E16
Merged-chr13-70378191-2	chr13	70374601	70379400	chr13-127	E17
Merged-chr13-97358725-2	chr13	97358001	97359000	chr13-128	E14
Merged-chr13-97508082-2	chr13	97504601	97511800	chr13-129	E9
Merged-chr13-106972131-2	chr13	106970601	106973600	chr13-130	E10
Merged-chr13-108159739-2	chr13	108159201	108160200	chr13-131	E12
Merged-chr13-113858326-2	chr13	113856601	113859000	chr13-132	E11
Merged-chr13-5170619-2	chr13	5165001	5178400	chr13-133	E16
Merged-chr13-5550188-2	chr13	5549601	5550400	chr13-134	E13
Merged-chr13-9405634-2	chr13	9405401	9405800	chr13-135	E15
Merged-chr13-14582883-2	chr13	14574401	14588600	chr13-138	E17
Merged-chr13-17458259-2	chr13	17458001	17458800	chr13-139	E15
Merged-chr13-17700712-2	chr13	17700601	17701000	chr13-140	E12
Merged-chr13-18162815-2	chr13	18156201	18166400	chr13-141	E17
Merged-chr13-21939146-2	chr13	21938201	21940200	chr13-142	E16
Merged-chr13-24849453-2	chr13	24849201	24849600	chr13-144	E5
Merged-chr13-25556606-2	chr13	25548801	25562600	chr13-145	E16
Merged-chr13-32802301-2	chr13	32802001	32803200	chr13-146	E2
Merged-chr13-36750644-2	chr13	36749401	36751400	chr13-149	E17
Merged-chr13-40814702-2	chr13	40809201	40817200	chr13-150	E16
Merged-chr13-45461999-2	chr13	45456001	45464600	chr13-154	E17
Merged-chr13-46619789-2	chr13	46619601	46620000	chr13-155	E3
Merged-chr13-51845873-2	chr13	51845401	51846200	chr13-156	E2
Merged-chr13-52562883-2	chr13	52562201	52564600	chr13-157	E14
Merged-chr13-52813410-2	chr13	52813201	52813600	chr13-159	E3
Merged-chr13-52906487-2	chr13	52906201	52906600	chr13-160	E4
Merged-chr13-54794410-2	chr13	54794001	54794800	chr13-161	E3
Merged-chr13-60682739-2	chr13	60682601	60683000	chr13-163	E18
Merged-chr13-60752500-2	chr13	60752401	60752600	chr13-164	E8
Merged-chr13-63033199-2	chr13	63033001	63033600	chr13-165	E5
Merged-chr13-63979858-2	chr13	63978801	63980400	chr13-166	E13
Merged-chr13-64101574-2	chr13	64099601	64103400	chr13-167	E6
Merged-chr13-87211470-2	chr13	87204201	87220400	chr13-172	E16
Merged-chr13-96036164-2	chr13	96031201	96038400	chr13-175	E16
Merged-chr13-102643737-2	chr13	102642401	102644200	chr13-178	E17
Merged-chr13-107908180-2	chr13	107908001	107908400	chr13-179	E14
Merged-chr9-74366183-2	chr9	74366001	74366400	chr9-12	E5
Merged-chr9-108567466-2	chr9	108566601	108568800	chr9-19	E2
Merged-chr13-111765303-2	chr13	111765201	111765400	chr13-180	E8
Merged-chr13-118091597-2	chr13	118087401	118102800	chr13-183	E16
Merged-chr13-118673033-2	chr13	118672001	118673400	chr13-184	E16
Merged-chr9-41332524-2	chr9	41328801	41334600	chr9-22	E17
Merged-chr9-120011395-2	chr9	120011201	120011600	chr9-23	E3
Merged-chr9-102668337-2	chr9	102668001	102668600	chr9-28	E3
Merged-chr9-115537299-2	chr9	115537001	115537400	chr9-32	E15
Merged-chr9-62676001-2	chr9	62675601	62676400	chr9-37	E6
Merged-chr9-37054318-2	chr9	37054001	37054600	chr9-41	E2
Merged-chr9-54840220-2	chr9	54839801	54840400	chr9-42	E13
Merged-chr9-120292180-2	chr9	120289401	120295400	chr9-44	E17
Merged-chr9-62166307-2	chr9	62166001	62166600	chr9-45	E4
Merged-chr9-40528931-2	chr9	40528801	40529000	chr9-47	E5
Merged-chr9-118818711-2	chr9	118818601	118819000	chr9-48	E15
Merged-chr9-121932600-2	chr9	121932201	121932800	chr9-49	E5
Merged-chr9-8035772-2	chr9	8035601	8036000	chr9-51	E13
Merged-chr9-61366608-2	chr9	61366201	61367400	chr9-53	E14
Merged-chr9-66281783-2	chr9	66281601	66282000	chr9-54	E3
Merged-chr9-110205967-2	chr9	110205401	110206200	chr9-56	E8
Merged-chr9-21719349-2	chr9	21719001	21719600	chr9-57	E3
Merged-chr9-21027742-2	chr9	21026201	21028800	chr9-59	E8
Merged-chr9-65544496-2	chr9	65542201	65545800	chr9-61	E6
Merged-chr9-57244626-2	chr9	57244401	57244800	chr9-62	E14
Merged-chr9-75683916-2	chr9	75683601	75684200	chr9-63	E2
Merged-chr9-58521492-2	chr9	58521401	58521600	chr9-65	E14
Merged-chr9-65823902-2	chr9	65823801	65824000	chr9-66	E12
Merged-chr9-22051654-2	chr9	22050201	22052200	chr9-68	E2
Merged-chr9-71863695-2	chr9	71856201	71874800	chr9-69	E10
Merged-chr9-99158730-2	chr9	99158201	99159600	chr9-70	E14
Merged-chr9-120507910-2	chr9	120507801	120508000	chr9-71	E5
Merged-chr9-36973531-2	chr9	36973401	36973600	chr9-72	E4
Merged-chr9-52153486-2	chr9	52153401	52153600	chr9-73	E15
Merged-chr9-70665491-2	chr9	70665201	70665600	chr9-74	E14
Merged-chr9-76565886-2	chr9	76565601	76566200	chr9-75	E15
Merged-chr9-102690432-2	chr9	102689801	102691400	chr9-76	E2
Merged-chr9-69471081-2	chr9	69470801	69471400	chr9-79	E14
Merged-chr9-107521417-2	chr9	107521201	107521600	chr9-80	E2
Merged-chr9-65109591-2	chr9	65109201	65110000	chr9-82	E2
Merged-chr9-119710039-2	chr9	119709801	119710200	chr9-83	E5
Merged-chr9-121415571-2	chr9	121415001	121415800	chr9-84	E8
Merged-chr9-61293334-2	chr9	61293201	61293400	chr9-87	E2
Merged-chr9-62180760-2	chr9	62180601	62181000	chr9-88	E4
Merged-chr9-106646127-2	chr9	106646001	106646200	chr9-89	E3
Merged-chr9-122476638-2	chr9	122476401	122477000	chr9-90	E5
Merged-chr9-17875066-2	chr9	17874801	17875400	chr9-92	E15
Merged-chr9-57148417-2	chr9	57148201	57148600	chr9-93	E2
Merged-chr9-66514338-2	chr9	66514001	66514800	chr9-94	E2
Merged-chr9-83834190-2	chr9	83833801	83834400	chr9-95	E13
Merged-chr9-89671012-2	chr9	89670801	89671200	chr9-96	E15
Merged-chr9-106646760-2	chr9	106646201	106647200	chr9-97	E1
Merged-chr9-112207959-2	chr9	112207801	112208200	chr9-98	E3
Merged-chr9-122117137-2	chr9	122117001	122117200	chr9-99	E5
Merged-chr15-99224263-2	chr15	99223401	99226400	chr15-100	E2
Merged-chr15-100910232-2	chr15	100910001	100910800	chr15-101	E13
Merged-chr15-10723960-2	chr15	10723801	10724400	chr15-102	E13
Merged-chr15-11461810-2	chr15	11461401	11462200	chr15-103	E15
Merged-chr15-22087116-2	chr15	22086801	22087400	chr15-104	E15
Merged-chr15-41789148-2	chr15	41788401	41789600	chr15-105	E2
Merged-chr15-59291700-2	chr15	59291601	59291800	chr15-106	E14
Merged-chr15-59828884-2	chr15	59828601	59829600	chr15-107	E14
Merged-chr15-64193989-2	chr15	64193201	64195200	chr15-108	E10
Merged-chr15-65585720-2	chr15	65585601	65585800	chr15-109	E5
Merged-chr15-78231195-2	chr15	78229801	78232600	chr15-111	E6
Merged-chr15-79832187-2	chr15	79831801	79832400	chr15-112	E8
Merged-chr15-83248255-2	chr15	83248201	83248400	chr15-114	E13
Merged-chr15-83749673-2	chr15	83749601	83749800	chr15-115	E14
Merged-chr15-95433847-2	chr15	95433001	95436200	chr15-116	E17
Merged-chr15-98852812-2	chr15	98851401	98856400	chr15-117	E8
Merged-chr15-99792537-2	chr15	99792401	99792600	chr15-118	E8
Merged-chr15-100770482-2	chr15	100770201	100770600	chr15-119	E4
Merged-chr15-101228246-2	chr15	101228001	101228400	chr15-120	E2
Merged-chr15-8451352-2	chr15	8451201	8451600	chr15-123	E14
Merged-chr15-12803460-2	chr15	12802401	12804800	chr15-125	E6
Merged-chr15-36333487-2	chr15	36333401	36333600	chr15-126	E5
Merged-chr15-41667360-2	chr15	41667001	41668200	chr15-130	E17
Merged-chr15-47574304-2	chr15	47571601	47577200	chr15-131	E16
Merged-chr15-53858209-2	chr15	53855801	53859800	chr15-132	E16
Merged-chr15-54801006-2	chr15	54800001	54802000	chr15-133	E17
Merged-chr15-58137437-2	chr15	58136601	58139400	chr15-134	E6
Merged-chr15-59648425-2	chr15	59647401	59650200	chr15-136	E2
Merged-chr15-62092322-2	chr15	62091201	62092800	chr15-137	E13
Merged-chr15-64747482-2	chr15	64745201	64750400	chr15-139	E17
Merged-chr15-75669740-2	chr15	75668401	75670600	chr15-140	E4
Merged-chr15-77022675-2	chr15	77022401	77023000	chr15-144	E4
Merged-chr15-77116433-2	chr15	77116201	77116600	chr15-145	E8
Merged-chr15-79375036-2	chr15	79374201	79375400	chr15-147	E8
Merged-chr15-79972263-2	chr15	79972001	79972400	chr15-149	E14
Merged-chr15-83265643-2	chr15	83265401	83266200	chr15-152	E14
Merged-chr15-83329244-2	chr15	83329001	83329600	chr15-153	E7
Merged-chr15-84212904-2	chr15	84212401	84213200	chr15-155	E9
Merged-chr15-84544004-2	chr15	84542201	84545400	chr15-156	E6
Merged-chr15-84715109-2	chr15	84715001	84715400	chr15-158	E13
Merged-chr15-86963132-2	chr15	86962201	86964000	chr15-159	E6
Merged-chr15-96308582-2	chr15	96308201	96309600	chr15-160	E7
Merged-chr15-98249725-2	chr15	98248201	98253800	chr15-162	E17
Merged-chr15-98714092-2	chr15	98714001	98714200	chr15-163	E4
Merged-chr15-100630223-2	chr15	100629801	100630400	chr15-164	E8
Merged-chr15-102083588-2	chr15	102080601	102086600	chr15-165	E11
Merged-chr15-102294556-2	chr15	102293801	102295600	chr15-167	E10
Merged-chr15-102965673-2	chr15	102964001	102966800	chr15-168	E1
Merged-chr15-103529028-2	chr15	103528801	103529400	chr15-169	E8
Merged-chr5-37729088-2	chr5	37728801	37729200	chr5-10	E6
Merged-chr5-26413109-2	chr5	26413001	26413200	chr5-11	E5
Merged-chr5-107388329-2	chr5	107385601	107394400	chr5-12	E16
Merged-chr5-105498805-2	chr5	105498401	105499600	chr5-13	E15
Merged-chr5-116280623-2	chr5	116280401	116280800	chr5-14	E4
Merged-chr5-139814285-2	chr5	139814001	139814400	chr5-15	E2
Merged-chr5-113217764-2	chr5	113217401	113218000	chr5-16	E6
Merged-chr5-105415891-2	chr5	105415201	105416400	chr5-17	E2
Merged-chr5-31610485-2	chr5	31610401	31610600	chr5-18	E2
Merged-chr5-106044535-2	chr5	106044401	106044800	chr5-19	E5
Merged-chr5-149757295-2	chr5	149757201	149757400	chr5-20	E5
Merged-chr5-38656175-2	chr5	38655201	38656600	chr5-21	E13
Merged-chr5-114166093-2	chr5	114165001	114166600	chr5-22	E4
Merged-chr5-35210944-2	chr5	35209001	35211600	chr5-23	E6
Merged-chr5-136270301-2	chr5	136270201	136270600	chr5-24	E10
Merged-chr5-101095686-2	chr5	101095601	101095800	chr5-25	E5
Merged-chr5-135001273-2	chr5	135000601	135001600	chr5-26	E2
Merged-chr5-60700336-2	chr5	60699801	60701200	chr5-27	E15
Merged-chr5-128436997-2	chr5	128436801	128437200	chr5-28	E3
Merged-chr5-64626632-2	chr5	64626401	64626800	chr5-29	E3
Merged-chr5-122379938-2	chr5	122379801	122380000	chr5-30	E8
Merged-chr5-143288569-2	chr5	143288401	143288800	chr5-31	E3
Merged-chr5-113421131-2	chr5	113420801	113422000	chr5-32	E13
Merged-chr5-27009387-2	chr5	27009201	27009600	chr5-33	E15
Merged-chr5-30907797-2	chr5	30907201	30908200	chr5-34	E2
Merged-chr5-114561027-2	chr5	114560601	114561200	chr5-35	E2
Merged-chr5-134371177-2	chr5	134370801	134372000	chr5-36	E14
Merged-chr5-137631318-2	chr5	137630801	137631600	chr5-37	E2
Merged-chr5-15850289-2	chr5	15850201	15850400	chr5-38	E5
Merged-chr5-18688351-2	chr5	18687201	18688800	chr5-39	E14
Merged-chr5-81654199-2	chr5	81653801	81654600	chr5-40	E15
Merged-chr5-116525632-2	chr5	116525201	116525800	chr5-41	E5
Merged-chr5-124611065-2	chr5	124610801	124611200	chr5-42	E13
Merged-chr5-139822540-2	chr5	139822001	139824000	chr5-43	E8
Merged-chr5-136102204-2	chr5	136102001	136102400	chr5-44	E3
Merged-chr5-147293275-2	chr5	147292401	147293800	chr5-46	E3
Merged-chr5-81519588-2	chr5	81518801	81520400	chr5-48	E15
Merged-chr5-113492751-2	chr5	113492601	113493000	chr5-49	E3
Merged-chr5-117413769-2	chr5	117413401	117414400	chr5-50	E2
Merged-chr5-144856019-2	chr5	144855401	144856400	chr5-51	E7
Merged-chr5-18799211-2	chr5	18797601	18799800	chr5-52	E13
Merged-chr5-118776369-2	chr5	118775601	118776800	chr5-54	E6
Merged-chr5-36950920-2	chr5	36950401	36952200	chr5-55	E6
Merged-chr5-116473646-2	chr5	116472001	116474800	chr5-56	E6
Merged-chr5-134715284-2	chr5	134715201	134715400	chr5-57	E4
Merged-chr5-102160112-2	chr5	102159601	102160400	chr5-58	E15
Merged-chr5-110099144-2	chr5	110099001	110099200	chr5-59	E14
Merged-chr5-115435851-2	chr5	115435801	115436000	chr5-60	E12
Merged-chr5-137934039-2	chr5	137933201	137934400	chr5-62	E14
Merged-chr5-14039242-2	chr5	14038801	14039400	chr5-63	E13
Merged-chr5-32729244-2	chr5	32728801	32729800	chr5-64	E3
Merged-chr5-34287948-2	chr5	34286401	34288800	chr5-65	E2
Merged-chr5-43860535-2	chr5	43859801	43860800	chr5-66	E13
Merged-chr5-75085502-2	chr5	75085401	75085800	chr5-67	E2
Merged-chr5-108629763-2	chr5	108629201	108630400	chr5-68	E2
Merged-chr5-113800340-2	chr5	113800201	113800400	chr5-69	E2
Merged-chr5-118322039-2	chr5	118321601	118322200	chr5-70	E3
Merged-chr5-125393195-2	chr5	125392601	125393600	chr5-71	E13
Merged-chr5-143434421-2	chr5	143434001	143434600	chr5-72	E5
Merged-chr5-143561960-2	chr5	143561401	143562200	chr5-73	E8
Merged-chr5-3943472-2	chr5	3943201	3944000	chr5-74	E15
Merged-chr5-34175461-2	chr5	34175001	34175800	chr5-75	E3
Merged-chr5-61160379-2	chr5	61160201	61160600	chr5-76	E15
Merged-chr5-65526350-2	chr5	65526001	65526800	chr5-77	E13
Merged-chr5-66212650-2	chr5	66212001	66214200	chr5-78	E18
Merged-chr5-92106731-2	chr5	92106001	92107600	chr5-79	E13
Merged-chr5-93054222-2	chr5	93054001	93054400	chr5-80	E15
Merged-chr5-106758138-2	chr5	106757801	106758400	chr5-81	E3
Merged-chr5-115492057-2	chr5	115491801	115492400	chr5-82	E2
Merged-chr5-119055673-2	chr5	119055401	119055800	chr5-83	E3
Merged-chr5-122773988-2	chr5	122773401	122774600	chr5-84	E7
Merged-chr5-134099713-2	chr5	134099001	134100400	chr5-85	E2
Merged-chr5-145217863-2	chr5	145217601	145218200	chr5-86	E12
Merged-chr5-23387066-2	chr5	23386601	23387400	chr5-87	E13
Merged-chr5-25009856-2	chr5	25009001	25010400	chr5-88	E13
Merged-chr5-25654835-2	chr5	25654601	25655000	chr5-89	E2
Merged-chr17-46886411-2	chr17	46886201	46886600	chr17-100	E13
Merged-chr17-56554375-2	chr17	56554001	56554600	chr17-101	E2
Merged-chr17-56716928-2	chr17	56716801	56717000	chr17-102	E13
Merged-chr17-87193767-2	chr17	87193601	87194200	chr17-104	E3
Merged-chr5-29811926-2	chr5	29811601	29812800	chr5-90	E14
Merged-chr17-13668793-2	chr17	13668601	13669000	chr17-105	E3
Merged-chr5-34634084-2	chr5	34633601	34635000	chr5-91	E8
Merged-chr17-28834926-2	chr17	28834801	28835000	chr17-106	E3
Merged-chr5-53671668-2	chr5	53671601	53671800	chr5-92	E14
Merged-chr17-29617349-2	chr17	29617201	29617600	chr17-107	E12
Merged-chr5-102845170-2	chr5	102844801	102845600	chr5-93	E3
Merged-chr17-30324483-2	chr17	30322001	30327200	chr17-108	E10
Merged-chr5-113221076-2	chr5	113220401	113221400	chr5-94	E2
Merged-chr17-46132508-2	chr17	46132201	46132800	chr17-109	E3
Merged-chr5-123315414-2	chr5	123315201	123315600	chr5-95	E3
Merged-chr5-123346470-2	chr5	123346201	123346600	chr5-96	E2
Merged-chr5-132712930-2	chr5	132712801	132713000	chr5-97	E5
Merged-chr5-134942643-2	chr5	134941201	134945400	chr5-98	E12
Merged-chr5-135107211-2	chr5	135106801	135108400	chr5-99	E2
Merged-chr17-70828682-2	chr17	70826201	70830400	chr17-110	E13
Merged-chr17-70901058-2	chr17	70900801	70901800	chr17-111	E13
Merged-chr17-73747965-2	chr17	73744601	73751600	chr17-112	E17
Merged-chr17-87973787-2	chr17	87972801	87974600	chr17-113	E13
Merged-chr17-5053368-2	chr17	5053201	5053600	chr17-114	E3
Merged-chr17-9167402-2	chr17	9167001	9168000	chr17-115	E2
Merged-chr17-13744057-2	chr17	13744001	13744200	chr17-116	E13
Merged-chr17-23664664-2	chr17	23664401	23664800	chr17-118	E14
Merged-chr17-27186380-2	chr17	27186201	27186800	chr17-119	E4
Merged-chr17-30601559-2	chr17	30601001	30602400	chr17-121	E12
Merged-chr17-31126032-2	chr17	31125801	31126200	chr17-122	E4
Merged-chr17-32073712-2	chr17	32073401	32074400	chr17-123	E3
Merged-chr17-32947718-2	chr17	32947401	32948200	chr17-124	E13
Merged-chr17-45805803-2	chr17	45805601	45806200	chr17-125	E3
Merged-chr17-47462863-2	chr17	47462601	47463200	chr17-126	E3
Merged-chr17-47522006-2	chr17	47521601	47522800	chr17-127	E2
Merged-chr17-49368451-2	chr17	49368401	49368600	chr17-128	E5
Merged-chr17-49384798-2	chr17	49384601	49385000	chr17-129	E5
Merged-chr17-56781960-2	chr17	56781401	56782200	chr17-130	E9
Merged-chr17-65961849-2	chr17	65961401	65962200	chr17-131	E15
Merged-chr17-66480465-2	chr17	66480201	66480800	chr17-132	E2
Merged-chr17-75534725-2	chr17	75534201	75535000	chr17-133	E15
Merged-chr17-79365082-2	chr17	79364801	79365800	chr17-134	E14
Merged-chr17-80231743-2	chr17	80231201	80232800	chr17-135	E10
Merged-chr17-88440896-2	chr17	88440201	88441800	chr17-136	E2
Merged-chr17-5277245-2	chr17	5277001	5277400	chr17-137	E3
Merged-chr17-6476765-2	chr17	6476401	6477000	chr17-138	E2
Merged-chr17-6828018-2	chr17	6827401	6828600	chr17-139	E2
Merged-chr17-7906792-2	chr17	7906601	7907000	chr17-140	E15
Merged-chr17-12992474-2	chr17	12991601	12993000	chr17-141	E2
Merged-chr17-15295800-2	chr17	15294801	15297200	chr17-143	E17
Merged-chr17-15343234-2	chr17	15343001	15343400	chr17-144	E3
Merged-chr17-28594097-2	chr17	28594001	28594200	chr17-147	E11
Merged-chr17-28778038-2	chr17	28777601	28778600	chr17-148	E4
Merged-chr17-28882518-2	chr17	28882401	28882600	chr17-149	E3
Merged-chr17-29439350-2	chr17	29438601	29441600	chr17-150	E14
Merged-chr17-29855001-2	chr17	29854401	29855400	chr17-151	E14
Merged-chr17-31057998-2	chr17	31057401	31058600	chr17-156	E2
Merged-chr17-31264465-2	chr17	31264401	31264600	chr17-157	E13
Merged-chr17-35141253-2	chr17	35141001	35141400	chr17-158	E9
Merged-chr17-41556430-2	chr17	41543001	41569200	chr17-159	E16
Merged-chr17-45063022-2	chr17	45062001	45065000	chr17-161	E17
Merged-chr17-45886485-2	chr17	45885201	45887200	chr17-162	E3
Merged-chr17-48101104-2	chr17	48100801	48101400	chr17-163	E13
Merged-chr17-49889984-2	chr17	49889601	49890200	chr17-164	E3
Merged-chr17-50625402-2	chr17	50624201	50627000	chr17-165	E17
Merged-chr17-55673585-2	chr17	55672401	55676400	chr17-166	E18
Merged-chr17-56357729-2	chr17	56357601	56358000	chr17-167	E15
Merged-chr17-67996339-2	chr17	67996001	67996800	chr17-168	E15
Merged-chr17-87445988-2	chr17	87445401	87446200	chr17-169	E12
Merged-chr17-87981660-2	chr17	87979001	87983400	chr17-170	E11
Merged-chr17-88500126-2	chr17	88500001	88500200	chr17-171	E3
Merged-chr17-91203935-2	chr17	91203601	91204400	chr17-172	E15
Merged-chr17-8368160-2	chr17	8367801	8368600	chr17-174	E3
Merged-chr17-10483700-2	chr17	10483601	10483800	chr17-175	E5
Merged-chr17-13712118-2	chr17	13712001	13712400	chr17-177	E4
Merged-chr11-23401605-2	chr11	23401401	23401800	chr11-200	E8
Merged-chr11-31396962-2	chr11	31396401	31397600	chr11-201	E14
Merged-chr11-51173800-2	chr11	51165401	51177200	chr11-202	E16
Merged-chr11-55264521-2	chr11	55264401	55264600	chr11-203	E5
Merged-chr11-56762789-2	chr11	56762201	56763200	chr11-204	E15
Merged-chr11-62249001-2	chr11	62248201	62250000	chr11-205	E2
Merged-chr11-76295069-2	chr11	76294801	76295400	chr11-206	E13
Merged-chr11-83776493-2	chr11	83776401	83776600	chr11-208	E2
Merged-chr11-87276818-2	chr11	87276401	87277000	chr11-209	E5
Merged-chr17-17917185-2	chr17	17912601	17928400	chr17-180	E17
Merged-chr17-20683018-2	chr17	20682801	20683200	chr17-181	E15
Merged-chr17-23602743-2	chr17	23601601	23605400	chr17-183	E12
Merged-chr17-24311440-2	chr17	24310601	24312200	chr17-185	E6
Merged-chr17-28037270-2	chr17	28036801	28038000	chr17-187	E4
Merged-chr17-29365487-2	chr17	29365201	29365800	chr17-188	E3
Merged-chr17-30116110-2	chr17	30115601	30117400	chr17-189	E7
Merged-chr11-95546525-2	chr11	95546401	95546600	chr11-210	E14
Merged-chr11-96713925-2	chr11	96713801	96714200	chr11-211	E13
Merged-chr11-97187608-2	chr11	97186801	97188000	chr11-212	E2
Merged-chr11-99366916-2	chr11	99366801	99367000	chr11-213	E3
Merged-chr11-99580857-2	chr11	99580601	99581000	chr11-214	E5
Merged-chr11-99780120-2	chr11	99780001	99780200	chr11-215	E5
Merged-chr11-102394542-2	chr11	102394201	102394800	chr11-218	E3
Merged-chr11-102624349-2	chr11	102623801	102624800	chr11-219	E3
Merged-chr17-30485010-2	chr17	30484401	30485800	chr17-190	E7
Merged-chr17-30615919-2	chr17	30615401	30616200	chr17-194	E7
Merged-chr17-31034295-2	chr17	31034001	31034600	chr17-199	E3
Merged-chr11-116457385-2	chr11	116455601	116459000	chr11-220	E4
Merged-chr11-3932112-2	chr11	3932001	3932200	chr11-221	E2
Merged-chr11-9116206-2	chr11	9115201	9116800	chr11-222	E13
Merged-chr11-11855358-2	chr11	11855201	11855800	chr11-223	E13
Merged-chr11-32718573-2	chr11	32718001	32719000	chr11-224	E10
Merged-chr11-33578866-2	chr11	33578801	33579000	chr11-225	E3
Merged-chr11-35086234-2	chr11	35086001	35086400	chr11-226	E15
Merged-chr11-36020940-2	chr11	36020801	36021000	chr11-227	E4
Merged-chr11-49589263-2	chr11	49589001	49589800	chr11-228	E16
Merged-chr11-51936370-2	chr11	51936201	51936800	chr11-229	E4
Merged-chr11-66932860-2	chr11	66931401	66934200	chr11-230	E14
Merged-chr11-74877115-2	chr11	74877001	74877400	chr11-231	E4
Merged-chr11-88689843-2	chr11	88689401	88690200	chr11-232	E2
Merged-chr11-97671904-2	chr11	97671201	97673800	chr11-233	E12
Merged-chr11-116500087-2	chr11	116500001	116500200	chr11-234	E4
Merged-chr11-117438617-2	chr11	117438401	117439000	chr11-235	E14
Merged-chr11-117522142-2	chr11	117522001	117522400	chr11-236	E3
Merged-chr11-118348811-2	chr11	118348601	118349400	chr11-237	E3
Merged-chr11-4940368-2	chr11	4940001	4940600	chr11-239	E8
Merged-chr11-26372174-2	chr11	26371601	26372800	chr11-241	E14
Merged-chr11-29597365-2	chr11	29596801	29598000	chr11-242	E14
Merged-chr11-36376590-2	chr11	36373201	36379000	chr11-244	E17
Merged-chr11-61411401-2	chr11	61411201	61411600	chr11-246	E4
Merged-chr11-69800635-2	chr11	69800001	69802000	chr11-247	E2
Merged-chr11-85969691-2	chr11	85967201	85972400	chr11-248	E17
Merged-chr11-88179521-2	chr11	88179201	88179800	chr11-249	E14
Merged-chr11-97944814-2	chr11	97944401	97945400	chr11-250	E4
Merged-chr11-101590343-2	chr11	101590201	101590600	chr11-251	E2
Merged-chr11-114650599-2	chr11	114650001	114650800	chr11-253	E6
Merged-chr11-115367606-2	chr11	115366801	115368000	chr11-254	E2
Merged-chr11-116885919-2	chr11	116885401	116886200	chr11-255	E13
Merged-chr11-117627307-2	chr11	117627001	117627600	chr11-256	E2
Merged-chr11-3794703-2	chr11	3794601	3794800	chr11-258	E4
Merged-chr11-6154323-2	chr11	6154001	6154800	chr11-259	E12
Merged-chr11-9117369-2	chr11	9117201	9117800	chr11-260	E13
Merged-chr11-20305610-2	chr11	20305401	20305800	chr11-261	E8
Merged-chr11-21614035-2	chr11	21604601	21620200	chr11-262	E16
Merged-chr11-22610460-2	chr11	22610201	22610800	chr11-263	E2
Merged-chr11-32223015-2	chr11	32222801	32223400	chr11-265	E3
Merged-chr11-33193836-2	chr11	33193601	33194000	chr11-266	E2
Merged-chr11-52191116-2	chr11	52188201	52199000	chr11-267	E16
Merged-chr11-55097687-2	chr11	55096801	55098000	chr11-268	E13
Merged-chr11-60233392-2	chr11	60233001	60233600	chr11-269	E3
Merged-chr11-66906480-2	chr11	66906001	66907200	chr11-270	E13
Merged-chr11-69795881-2	chr11	69795401	69796200	chr11-271	E2
Merged-chr11-70060970-2	chr11	70059801	70062600	chr11-272	E6
Merged-chr11-71513095-2	chr11	71513001	71513200	chr11-273	E3
Merged-chr11-76287385-2	chr11	76287001	76287600	chr11-274	E2
Merged-chr11-86412652-2	chr11	86412201	86413000	chr11-275	E3
Merged-chr11-88404814-2	chr11	88404401	88405800	chr11-276	E3
Merged-chr11-88629926-2	chr11	88629601	88630200	chr11-277	E13
Merged-chr11-93997292-2	chr11	93997001	93997400	chr11-278	E13
Merged-chr11-95963593-2	chr11	95963401	95963800	chr11-279	E8
Merged-chr1-179072072-2	chr1	179071201	179072400	chr1-10	E18
Merged-chr1-35995903-2	chr1	35995401	35996200	chr1-11	E4
Merged-chr1-91414322-2	chr1	91414001	91414800	chr1-12	E2
Merged-chr1-74106548-2	chr1	74106201	74107200	chr1-13	E3
Merged-chr1-120211657-2	chr1	120210401	120214200	chr1-14	E6
Merged-chr1-39478194-2	chr1	39477601	39479000	chr1-15	E2
Merged-chr1-135248678-2	chr1	135248601	135248800	chr1-16	E2
Merged-chr1-54485145-2	chr1	54484801	54485600	chr1-17	E14
Merged-chr1-135668440-2	chr1	135668201	135668600	chr1-19	E3
Merged-chr11-100939369-2	chr11	100938801	100939600	chr11-280	E2
Merged-chr11-101468332-2	chr11	101467801	101469200	chr11-281	E2
Merged-chr11-101965008-2	chr11	101964401	101965800	chr11-282	E1
Merged-chr11-103730796-2	chr11	103730601	103731200	chr11-283	E2
Merged-chr11-105151665-2	chr11	105151201	105152000	chr11-284	E2
Merged-chr11-116745590-2	chr11	116745001	116746200	chr11-285	E14
Merged-chr11-117832356-2	chr11	117832201	117832800	chr11-288	E2
Merged-chr11-118875358-2	chr11	118874801	118876200	chr11-289	E4
Merged-chr1-176974628-2	chr1	176973001	176975600	chr1-20	E17
Merged-chr1-64196185-2	chr1	64196001	64196400	chr1-21	E3
Merged-chr1-185983294-2	chr1	185977401	185985800	chr1-22	E16
Merged-chr1-43136519-2	chr1	43135801	43137000	chr1-24	E5
Merged-chr1-59697911-2	chr1	59697801	59698000	chr1-25	E11
Merged-chr1-27098120-2	chr1	27065201	27109400	chr1-26	E16
Merged-chr1-36251602-2	chr1	36251401	36251800	chr1-27	E3
Merged-chr1-153071742-2	chr1	153071601	153071800	chr1-28	E3
Merged-chr1-118759471-2	chr1	118759401	118759600	chr1-29	E3
Merged-chr11-120344315-2	chr11	120343801	120344800	chr11-290	E18
Merged-chr11-4987036-2	chr11	4986801	4987400	chr11-292	E2
Merged-chr11-5130868-2	chr11	5130201	5132200	chr11-293	E3
Merged-chr11-6650704-2	chr11	6650601	6650800	chr11-294	E4
Merged-chr11-9263228-2	chr11	9262801	9263600	chr11-295	E15
Merged-chr11-10310134-2	chr11	10309801	10310400	chr11-296	E15
Merged-chr11-14239474-2	chr11	14237401	14245000	chr11-297	E16
Merged-chr11-23659151-2	chr11	23654201	23662800	chr11-298	E11
Merged-chr11-30268020-2	chr11	30266801	30269000	chr11-299	E2
Merged-chr1-146427099-2	chr1	146426401	146427800	chr1-30	E14
Merged-chr1-165911825-2	chr1	165911601	165912200	chr1-31	E14
Merged-chr1-59423094-2	chr1	59422801	59423400	chr1-33	E2
Merged-chr1-54754484-2	chr1	54754201	54754600	chr1-34	E5
Merged-chr1-20058511-2	chr1	20058401	20058600	chr1-35	E5
Merged-chr1-89998887-2	chr1	89998801	89999000	chr1-36	E4
Merged-chr1-87327459-2	chr1	87327001	87327800	chr1-37	E2
Merged-chr1-17506953-2	chr1	17506601	17507400	chr1-39	E15
Merged-chr1-36061567-2	chr1	36061201	36062400	chr1-40	E13
Merged-chr1-84869221-2	chr1	84868401	84870400	chr1-41	E13
Merged-chr1-86434527-2	chr1	86434001	86435000	chr1-42	E2
Merged-chr1-86509545-2	chr1	86509401	86509600	chr1-43	E3
Merged-chr1-161099832-2	chr1	161095801	161109200	chr1-44	E10
Merged-chr1-11395654-2	chr1	11395201	11396200	chr1-45	E13
Merged-chr1-74825022-2	chr1	74824401	74825600	chr1-46	E13
Merged-chr1-88924370-2	chr1	88924201	88924600	chr1-48	E3
Merged-chr1-92365716-2	chr1	92364601	92366800	chr1-49	E5
Merged-chr1-132890838-2	chr1	132890201	132891400	chr1-50	E4
Merged-chr1-181852993-2	chr1	181852401	181853200	chr1-51	E13
Merged-chr1-182182058-2	chr1	182181601	182182400	chr1-52	E14
Merged-chr1-12814739-2	chr1	12814401	12815400	chr1-53	E14
Merged-chr1-63110761-2	chr1	63110001	63111600	chr1-54	E12
Merged-chr1-89488358-2	chr1	89487801	89489800	chr1-57	E7
Merged-chr1-153641818-2	chr1	153641401	153642600	chr1-58	E2
Merged-chr1-190161356-2	chr1	190160801	190161600	chr1-59	E3
Merged-chr1-4802749-2	chr1	4802601	4803000	chr1-60	E14
Merged-chr1-53750093-2	chr1	53749801	53750200	chr1-61	E14
Merged-chr1-58762486-2	chr1	58761201	58763200	chr1-62	E14
Merged-chr1-64299233-2	chr1	64299001	64299400	chr1-63	E15
Merged-chr1-125808679-2	chr1	125808601	125808800	chr1-64	E5
Merged-chr1-131178982-2	chr1	131178401	131179600	chr1-65	E10
Merged-chr1-133694091-2	chr1	133693201	133695600	chr1-66	E13
Merged-chr1-134067392-2	chr1	134067201	134067600	chr1-67	E3
Merged-chr1-153733486-2	chr1	153733001	153734000	chr1-68	E3
Merged-chr1-191435668-2	chr1	191435401	191436000	chr1-69	E3
Merged-chr1-60853086-2	chr1	60852201	60854200	chr1-72	E13
Merged-chr1-75662866-2	chr1	75662801	75663000	chr1-73	E3
Merged-chr1-91413131-2	chr1	91412001	91413800	chr1-74	E2
Merged-chr1-125390018-2	chr1	125389201	125390600	chr1-75	E17
Merged-chr1-134061270-2	chr1	134060801	134061600	chr1-76	E2
Merged-chr1-192455364-2	chr1	192454401	192456600	chr1-77	E14
Merged-chr1-193036161-2	chr1	193036001	193036400	chr1-78	E3
Merged-chr1-26907979-2	chr1	26907401	26908400	chr1-79	E15
Merged-chr1-65232213-2	chr1	65231001	65233400	chr1-80	E10
Merged-chr1-86758134-2	chr1	86757601	86758600	chr1-83	E14
Merged-chr1-89931043-2	chr1	89930001	89931800	chr1-84	E2
Merged-chr1-132853455-2	chr1	132853201	132853600	chr1-85	E3
Merged-chr1-153493847-2	chr1	153493201	153495000	chr1-86	E13
Merged-chr1-154150149-2	chr1	154150001	154150200	chr1-87	E5
Merged-chr1-166155088-2	chr1	166154401	166155400	chr1-88	E2
Merged-chr1-185878569-2	chr1	185875201	185880600	chr1-89	E17
Merged-chr1-194747032-2	chr1	194746001	194748000	chr1-90	E15
Merged-chr1-3671689-2	chr1	3670601	3672600	chr1-91	E2
Merged-chr1-17251038-2	chr1	17250801	17251400	chr1-92	E13
Merged-chr1-38797862-2	chr1	38796801	38800400	chr1-93	E6
Merged-chr1-39192970-2	chr1	39192401	39194600	chr1-94	E2
Merged-chr1-86503724-2	chr1	86503201	86504800	chr1-95	E2
Merged-chr1-89628543-2	chr1	89627801	89629400	chr1-96	E10
Merged-chr1-90405180-2	chr1	90404801	90405600	chr1-97	E14
Merged-chr1-92348725-2	chr1	92348601	92349000	chr1-98	E2
Merged-chr1-93306057-2	chr1	93306001	93306200	chr1-99	E13
Merged-chr2-69994456-2	chr2	69994201	69994600	chr2-100	E7
Merged-chr2-101665734-2	chr2	101665201	101666600	chr2-101	E14
Merged-chr2-113327788-2	chr2	113327401	113328200	chr2-102	E2
Merged-chr2-121101564-2	chr2	121101201	121101800	chr2-103	E5
Merged-chr2-125134299-2	chr2	125134001	125134600	chr2-104	E15
Merged-chr2-128818375-2	chr2	128818001	128818800	chr2-105	E2
Merged-chr2-128911977-2	chr2	128911001	128913000	chr2-106	E17
Merged-chr2-157059132-2	chr2	157058401	157059600	chr2-107	E2
Merged-chr2-164821212-2	chr2	164820001	164822400	chr2-108	E8
Merged-chr2-5667805-2	chr2	5667601	5668200	chr2-109	E14
Merged-chr2-105114160-2	chr2	105113801	105114400	chr2-110	E14
Merged-chr2-116979977-2	chr2	116979801	116980200	chr2-111	E3
Merged-chr2-127927748-2	chr2	127927601	127928000	chr2-112	E3
Merged-chr2-131190278-2	chr2	131189601	131190600	chr2-113	E9
Merged-chr2-135887670-2	chr2	135886001	135888600	chr2-114	E17
Merged-chr2-152735195-2	chr2	152734801	152735400	chr2-115	E2
Merged-chr2-153622729-2	chr2	153622601	153622800	chr2-116	E14
Merged-chr2-155850304-2	chr2	155849601	155851000	chr2-117	E8
Merged-chr2-164435590-2	chr2	164435001	164435800	chr2-118	E14
Merged-chr2-3546707-2	chr2	3546201	3547000	chr2-119	E15
Merged-chr2-39191000-2	chr2	39190801	39191200	chr2-121	E3
Merged-chr2-61403393-2	chr2	61403201	61403600	chr2-122	E15
Merged-chr2-75634091-2	chr2	75634001	75634200	chr2-123	E2
Merged-chr2-126552459-2	chr2	126552001	126552800	chr2-124	E13
Merged-chr2-154421418-2	chr2	154421001	154421800	chr2-125	E2
Merged-chr2-155962077-2	chr2	155961801	155962400	chr2-126	E7
Merged-chr2-172977547-2	chr2	172977401	172977600	chr2-127	E2
Merged-chr2-179520082-2	chr2	179520001	179520200	chr2-128	E3
Merged-chr2-26611223-2	chr2	26610801	26611400	chr2-129	E13
Merged-chr2-28202386-2	chr2	28202001	28202600	chr2-130	E14
Merged-chr2-30556358-2	chr2	30555201	30556800	chr2-131	E4
Merged-chr2-34920499-2	chr2	34920201	34920800	chr2-132	E3
Merged-chr2-59229519-2	chr2	59229201	59230000	chr2-133	E8
Merged-chr2-71388133-2	chr2	71387601	71389000	chr2-134	E13
Merged-chr2-91310250-2	chr2	91309201	91312400	chr2-135	E17
Merged-chr2-102117481-2	chr2	102117001	102117800	chr2-136	E13
Merged-chr2-104122804-2	chr2	104122601	104123400	chr2-137	E2
Merged-chr2-151967406-2	chr2	151967201	151967600	chr2-139	E3
Merged-chr2-154447735-2	chr2	154439801	154451000	chr2-140	E11
Merged-chr2-165815336-2	chr2	165815201	165815600	chr2-141	E8
Merged-chr2-165900612-2	chr2	165900401	165901200	chr2-142	E2
Merged-chr2-167503594-2	chr2	167503201	167504400	chr2-143	E2
Merged-chr2-167538161-2	chr2	167537601	167539000	chr2-144	E2
Merged-chr2-178635883-2	chr2	178635601	178636200	chr2-145	E14
Merged-chr2-18392671-2	chr2	18392001	18393000	chr2-146	E2
Merged-chr2-26459113-2	chr2	26458801	26459600	chr2-147	E13
Merged-chr2-26903007-2	chr2	26902601	26903400	chr2-148	E2
Merged-chr2-27505720-2	chr2	27505601	27505800	chr2-149	E14
Merged-chr2-29629040-2	chr2	29628801	29629200	chr2-151	E2
Merged-chr2-29751445-2	chr2	29750801	29752200	chr2-152	E2
Merged-chr2-30445867-2	chr2	30445401	30447000	chr2-153	E8
Merged-chr2-92948209-2	chr2	92948001	92948600	chr2-154	E3
Merged-chr2-102244682-2	chr2	102244401	102245000	chr2-155	E15
Merged-chr2-106200395-2	chr2	106200201	106200600	chr2-156	E15
Merged-chr2-109942364-2	chr2	109942201	109942800	chr2-157	E11
Merged-chr2-127444543-2	chr2	127444201	127444800	chr2-159	E2
Merged-chr2-138265500-2	chr2	138265201	138266000	chr2-160	E13
Merged-chr2-146838726-2	chr2	146838601	146838800	chr2-161	E3
Merged-chr2-154457507-2	chr2	154452201	154464200	chr2-162	E11
Merged-chr2-161166535-2	chr2	161165801	161166800	chr2-163	E14
Merged-chr2-166721989-2	chr2	166721801	166722200	chr2-164	E4
Merged-chr2-17011096-2	chr2	17003201	17031200	chr2-167	E16
Merged-chr2-23999170-2	chr2	23998401	24000200	chr2-168	E15
Merged-chr2-26299277-2	chr2	26298001	26301000	chr2-169	E3
Merged-chr2-29501265-2	chr2	29501001	29501600	chr2-170	E14
Merged-chr2-32162282-2	chr2	32161601	32162800	chr2-171	E12
Merged-chr2-33438752-2	chr2	33438001	33439800	chr2-173	E13
Merged-chr2-44537965-2	chr2	44534801	44540400	chr2-174	E1
Merged-chr2-60553138-2	chr2	60552801	60553600	chr2-175	E2
Merged-chr2-70818064-2	chr2	70809001	70823800	chr2-177	E11
Merged-chr2-71872590-2	chr2	71872001	71872800	chr2-178	E13
Merged-chr2-84742811-2	chr2	84742401	84743200	chr2-179	E2
Merged-chr2-105153389-2	chr2	105153001	105153800	chr2-180	E15
Merged-chr2-114227938-2	chr2	114202601	114237600	chr2-181	E17
Merged-chr2-121826014-2	chr2	121825001	121826400	chr2-182	E6
Merged-chr2-128211860-2	chr2	128211201	128212200	chr2-183	E2
Merged-chr2-135692783-2	chr2	135692401	135693000	chr2-184	E3
Merged-chr2-136677651-2	chr2	136677401	136678000	chr2-185	E1
Merged-chr2-156531490-2	chr2	156531001	156532000	chr2-187	E7
Merged-chr2-164805121-2	chr2	164804401	164805600	chr2-188	E2
Merged-chr2-167109648-2	chr2	167109401	167109800	chr2-189	E4
Merged-chr2-19392593-2	chr2	19392401	19392800	chr2-191	E13
Merged-chr2-19715997-2	chr2	19715601	19716200	chr2-192	E15
Merged-chr2-28369612-2	chr2	28369201	28370400	chr2-193	E3
Merged-chr2-29493576-2	chr2	29493201	29494000	chr2-194	E3
Merged-chr2-29934428-2	chr2	29933801	29934800	chr2-195	E14
Merged-chr2-31901892-2	chr2	31901601	31902600	chr2-196	E3
Merged-chr2-32713157-2	chr2	32712001	32714000	chr2-198	E2
Merged-chr17-31057248-2	chr17	31056801	31057400	chr17-200	E13
Merged-chr17-33600135-2	chr17	33600001	33600400	chr17-204	E14
Merged-chr17-33951336-2	chr17	33950201	33951800	chr17-206	E2
Merged-chr4-73774080-2	chr4	73773801	73774400	chr4-100	E15
Merged-chr4-101509096-2	chr4	101508801	101509400	chr4-101	E2
Merged-chr4-117827392-2	chr4	117825401	117829600	chr4-102	E6
Merged-chr4-130636890-2	chr4	130636801	130637000	chr4-103	E13
Merged-chr4-136148098-2	chr4	136147601	136148800	chr4-104	E2
Merged-chr4-139089351-2	chr4	139088801	139089600	chr4-105	E4
Merged-chr17-35525259-2	chr17	35525201	35525400	chr17-211	E3
Merged-chr17-35824548-2	chr17	35824401	35824600	chr17-213	E2
Merged-chr17-37990675-2	chr17	37989801	37991400	chr17-214	E14
Merged-chr17-45332781-2	chr17	45332601	45333000	chr17-215	E17
Merged-chr17-45630010-2	chr17	45629601	45630600	chr17-217	E2
Merged-chr17-46589516-2	chr17	46589201	46589800	chr17-218	E8
Merged-chr17-46891032-2	chr17	46890601	46891600	chr17-219	E2
Merged-chr4-43969567-2	chr4	43969401	43969800	chr4-110	E13
Merged-chr4-77234582-2	chr4	77221801	77249600	chr4-111	E16
Merged-chr4-109202171-2	chr4	109201601	109202400	chr4-112	E2
Merged-chr4-109476549-2	chr4	109476001	109477000	chr4-113	E2
Merged-chr4-124906434-2	chr4	124906001	124907000	chr4-114	E2
Merged-chr4-128715988-2	chr4	128715601	128716400	chr4-115	E2
Merged-chr4-132989537-2	chr4	132989001	132990800	chr4-116	E6
Merged-chr4-139111191-2	chr4	139110201	139111800	chr4-117	E7
Merged-chr17-47702992-2	chr17	47702401	47704000	chr17-220	E2
Merged-chr17-48250333-2	chr17	48250001	48250600	chr17-223	E17
Merged-chr17-58041370-2	chr17	58041001	58041600	chr17-224	E15
Merged-chr17-58089097-2	chr17	58070201	58107000	chr17-225	E16
Merged-chr17-65872880-2	chr17	65872801	65873000	chr17-226	E3
Merged-chr17-71406783-2	chr17	71403601	71410200	chr17-228	E10
Merged-chr4-155136189-2	chr4	155136001	155136600	chr4-121	E3
Merged-chr4-5515573-2	chr4	5515001	5516200	chr4-123	E14
Merged-chr4-6116010-2	chr4	6115601	6116400	chr4-124	E15
Merged-chr4-47498143-2	chr4	47497801	47498400	chr4-125	E4
Merged-chr4-53335422-2	chr4	53334801	53336200	chr4-126	E14
Merged-chr4-99206020-2	chr4	99205801	99206200	chr4-127	E5
Merged-chr4-110156196-2	chr4	110156001	110156600	chr4-128	E5
Merged-chr4-116819712-2	chr4	116819601	116820000	chr4-129	E11
Merged-chr17-80180419-2	chr17	80178601	80181800	chr17-230	E6
Merged-chr17-84541649-2	chr17	84541201	84542600	chr17-233	E17
Merged-chr17-87283008-2	chr17	87282001	87284200	chr17-234	E2
Merged-chr17-87577202-2	chr17	87574001	87583600	chr17-235	E17
Merged-chr17-88545215-2	chr17	88545001	88545400	chr17-236	E6
Merged-chr4-120217028-2	chr4	120216801	120217200	chr4-130	E3
Merged-chr4-125115038-2	chr4	125114801	125115600	chr4-131	E3
Merged-chr4-134018616-2	chr4	134018001	134020200	chr4-133	E2
Merged-chr4-134122492-2	chr4	134122201	134122800	chr4-134	E3
Merged-chr4-134634445-2	chr4	134634201	134634800	chr4-135	E2
Merged-chr4-142219320-2	chr4	142219001	142219800	chr4-136	E3
Merged-chr4-150809457-2	chr4	150809201	150809600	chr4-145	E4
Merged-chr4-151621896-2	chr4	151619601	151624400	chr4-146	E6
Merged-chr4-152134673-2	chr4	152134401	152134800	chr4-147	E3
Merged-chr4-152497396-2	chr4	152497001	152498200	chr4-148	E4
Merged-chr4-153481917-2	chr4	153481201	153483400	chr4-149	E2
Merged-chr4-153795280-2	chr4	153795001	153795600	chr4-150	E6
Merged-chr4-156055437-2	chr4	156055201	156055800	chr4-151	E8
Merged-chr4-41275538-2	chr4	41274801	41275800	chr4-152	E2
Merged-chr4-55288579-2	chr4	55288401	55288800	chr4-154	E15
Merged-chr4-55477970-2	chr4	55477001	55478600	chr4-155	E13
Merged-chr4-57781466-2	chr4	57781401	57781600	chr4-156	E2
Merged-chr4-75300892-2	chr4	75300601	75301400	chr4-157	E14
Merged-chr4-84202482-2	chr4	84202401	84202600	chr4-158	E3
Merged-chr4-104349478-2	chr4	104337801	104355800	chr4-159	E17
Merged-chr4-107429510-2	chr4	107429401	107429600	chr4-160	E4
Merged-chr4-114987153-2	chr4	114986601	114987400	chr4-161	E2
Merged-chr4-124847680-2	chr4	124847401	124847800	chr4-166	E10
Merged-chr4-133526408-2	chr4	133524201	133527800	chr4-169	E6
Merged-chr4-134082012-2	chr4	134081001	134082800	chr4-170	E2
Merged-chr4-134450437-2	chr4	134450001	134451200	chr4-171	E3
Merged-chr4-138445280-2	chr4	138445001	138445800	chr4-172	E13
Merged-chr11-31402465-2	chr11	31398801	31413400	chr11-300	E17
Merged-chr11-32619371-2	chr11	32619201	32619600	chr11-301	E3
Merged-chr11-46375151-2	chr11	46374601	46375400	chr11-302	E5
Merged-chr11-47640845-2	chr11	47640601	47641000	chr11-303	E15
Merged-chr11-51967799-2	chr11	51967401	51968200	chr11-304	E2
Merged-chr11-52224114-2	chr11	52223801	52224400	chr11-305	E13
Merged-chr11-59993011-2	chr11	59992401	59993400	chr11-306	E17
Merged-chr11-61782085-2	chr11	61782001	61782200	chr11-307	E3
Merged-chr11-65053243-2	chr11	65052801	65053600	chr11-308	E7
Merged-chr11-69965753-2	chr11	69964801	69967200	chr11-309	E2
Merged-chr4-150539986-2	chr4	150539801	150540200	chr4-183	E7
Merged-chr4-151295729-2	chr4	151295601	151295800	chr4-184	E4
Merged-chr4-8648026-2	chr4	8647001	8648600	chr4-187	E2
Merged-chr4-11056089-2	chr4	11056001	11056200	chr4-188	E7
Merged-chr4-13096837-2	chr4	13096201	13098200	chr4-189	E14
Merged-chr11-77180998-2	chr11	77175401	77186400	chr11-310	E17
Merged-chr11-78330683-2	chr11	78330601	78330800	chr11-312	E7
Merged-chr11-85777370-2	chr11	85776801	85777800	chr11-313	E6
Merged-chr11-86581086-2	chr11	86580401	86582800	chr11-314	E14
Merged-chr11-94344389-2	chr11	94343801	94345200	chr11-315	E4
Merged-chr4-26250780-2	chr4	26249001	26254400	chr4-191	E16
Merged-chr4-34854858-2	chr4	34848201	34859000	chr4-192	E11
Merged-chr4-37749393-2	chr4	37733401	37757200	chr4-193	E16
Merged-chr4-43372017-2	chr4	43371401	43372800	chr4-194	E1
Merged-chr4-43442909-2	chr4	43442201	43444000	chr4-195	E2
Merged-chr4-56052070-2	chr4	56052001	56052200	chr4-196	E14
Merged-chr4-58082809-2	chr4	58082601	58083000	chr4-197	E15
Merged-chr4-61815922-2	chr4	61815801	61816000	chr4-198	E5
Merged-chr11-97598649-2	chr11	97598201	97599400	chr11-320	E13
Merged-chr11-97802706-2	chr11	97800801	97806200	chr11-321	E12
Merged-chr11-99774083-2	chr11	99772601	99778400	chr11-322	E17
Merged-chr11-100975311-2	chr11	100974801	100975600	chr11-323	E4
Merged-chr11-117873312-2	chr11	117873001	117873600	chr11-328	E2
Merged-chr11-117931084-2	chr11	117930601	117931400	chr11-329	E2
Merged-chr11-118349744-2	chr11	118349401	118350200	chr11-331	E14
Merged-chr11-120852560-2	chr11	120852401	120852800	chr11-333	E2
Merged-chr11-3668578-2	chr11	3657601	3685600	chr11-338	E9
Merged-chr11-4186520-2	chr11	4186401	4186600	chr11-339	E2
Merged-chr11-4279885-2	chr11	4279601	4280400	chr11-340	E3
Merged-chr11-6157371-2	chr11	6157201	6157600	chr11-341	E8
Merged-chr11-6718415-2	chr11	6717001	6719200	chr11-342	E6
Merged-chr11-16603079-2	chr11	16602801	16603400	chr11-343	E14
Merged-chr11-16883712-2	chr11	16878201	16886200	chr11-344	E17
Merged-chr11-19794746-2	chr11	19794601	19794800	chr11-345	E6
Merged-chr11-19989913-2	chr11	19989601	19990200	chr11-346	E12
Merged-chr11-32226102-2	chr11	32226001	32226400	chr11-350	E13
Merged-chr11-32733716-2	chr11	32731201	32738200	chr11-351	E9
Merged-chr11-33557998-2	chr11	33557201	33560200	chr11-352	E10
Merged-chr11-40751065-2	chr11	40749801	40752200	chr11-355	E9
Merged-chr11-46230498-2	chr11	46230201	46230800	chr11-356	E5
Merged-chr11-48502557-2	chr11	48501801	48503200	chr11-357	E15
Merged-chr11-50863081-2	chr11	50862801	50863400	chr11-359	E4
Merged-chr11-51788853-2	chr11	51788601	51789000	chr11-360	E7
Merged-chr11-51943279-2	chr11	51942601	51944000	chr11-361	E4
Merged-chr11-54629537-2	chr11	54620001	54636000	chr11-363	E10
Merged-chr11-59780509-2	chr11	59779801	59782200	chr11-366	E10
Merged-chr11-60127172-2	chr11	60125401	60128800	chr11-367	E7
Merged-chr11-60470854-2	chr11	60470801	60471000	chr11-368	E3
Merged-chr11-64027530-2	chr11	64027401	64027600	chr11-370	E3
Merged-chr11-65713548-2	chr11	65712801	65713800	chr11-372	E7
Merged-chr11-69627392-2	chr11	69624201	69628600	chr11-374	E6
Merged-chr11-70170763-2	chr11	70170401	70171800	chr11-375	E6
Merged-chr11-70174948-2	chr11	70172201	70178400	chr11-376	E6
Merged-chr11-72908409-2	chr11	72907601	72908800	chr11-377	E7
Merged-chr11-75655885-2	chr11	75655401	75656800	chr11-378	E2
Merged-chr11-76351188-2	chr11	76350801	76351400	chr11-379	E13
Merged-chr11-77497008-2	chr11	77496801	77497200	chr11-380	E12
Merged-chr11-78411152-2	chr11	78410001	78411800	chr11-381	E6
Merged-chr11-78624503-2	chr11	78624001	78624800	chr11-382	E9
Merged-chr11-78956167-2	chr11	78955601	78956400	chr11-383	E6
Merged-chr11-84529266-2	chr11	84529201	84529400	chr11-384	E2
Merged-chr11-85335036-2	chr11	85334801	85335200	chr11-385	E7
Merged-chr11-86322492-2	chr11	86320401	86324400	chr11-386	E10
Merged-chr11-88817297-2	chr11	88817201	88817400	chr11-388	E14
Merged-chr11-88981465-2	chr11	88981001	88982200	chr11-389	E8
Merged-chr11-94579076-2	chr11	94578401	94579800	chr11-391	E6
Merged-chr11-97030399-2	chr11	97030001	97030600	chr11-394	E2
Merged-chr11-99792876-2	chr11	99792601	99793200	chr11-396	E5
Merged-chr11-99897682-2	chr11	99897601	99897800	chr11-397	E5
Merged-chr11-100264744-2	chr11	100264401	100265400	chr11-398	E3
Merged-chr11-100316319-2	chr11	100315801	100316600	chr11-399	E13
Merged-chr6-27672085-2	chr6	27668801	27673400	chr6-100	E16
Merged-chr6-29214195-2	chr6	29212601	29215200	chr6-101	E1
Merged-chr6-29639924-2	chr6	29639601	29640200	chr6-102	E13
Merged-chr6-33833092-2	chr6	33833001	33833200	chr6-103	E7
Merged-chr6-34317507-2	chr6	34317001	34317800	chr6-105	E2
Merged-chr6-38166482-2	chr6	38166001	38167600	chr6-106	E6
Merged-chr6-39420333-2	chr6	39419601	39420600	chr6-107	E2
Merged-chr6-42075830-2	chr6	42065801	42079200	chr6-108	E16
Merged-chr6-50381962-2	chr6	50381601	50382200	chr6-109	E14
Merged-chr6-51467422-2	chr6	51466801	51468800	chr6-110	E12
Merged-chr6-51486404-2	chr6	51486001	51487200	chr6-111	E18
Merged-chr6-52290557-2	chr6	52290001	52290800	chr6-112	E1
Merged-chr6-93353883-2	chr6	93353401	93354200	chr6-113	E15
Merged-chr6-94695314-2	chr6	94694601	94696200	chr6-114	E14
Merged-chr6-120679259-2	chr6	120676801	120682400	chr6-116	E11
Merged-chr6-122772907-2	chr6	122772801	122773000	chr6-117	E3
Merged-chr6-124994136-2	chr6	124994001	124994400	chr6-118	E3
Merged-chr6-129349919-2	chr6	129349401	129350400	chr6-119	E15
Merged-chr6-134621733-2	chr6	134621601	134621800	chr6-120	E2
Merged-chr6-134676140-2	chr6	134676001	134676400	chr6-121	E5
Merged-chr6-143941439-2	chr6	143941201	143941800	chr6-122	E15
Merged-chr6-149409042-2	chr6	149408601	149409600	chr6-123	E2
Merged-chr6-7844487-2	chr6	7843801	7844800	chr6-125	E13
Merged-chr6-19529774-2	chr6	19494201	19587000	chr6-126	E16
Merged-chr6-25337913-2	chr6	25328201	25356400	chr6-127	E16
Merged-chr6-28423920-2	chr6	28423401	28424600	chr6-128	E2
Merged-chr6-28748445-2	chr6	28748001	28748800	chr6-129	E7
Merged-chr6-34920094-2	chr6	34920001	34920200	chr6-134	E3
Merged-chr6-35027358-2	chr6	35026201	35028200	chr6-135	E7
Merged-chr6-35866033-2	chr6	35864801	35868800	chr6-137	E17
Merged-chr6-39318629-2	chr6	39318001	39319200	chr6-138	E14
Merged-chr6-42355508-2	chr6	42354801	42355800	chr6-139	E10
Merged-chr6-49367926-2	chr6	49367801	49368200	chr6-141	E2
Merged-chr6-51438554-2	chr6	51438401	51438800	chr6-142	E6
Merged-chr6-53757201-2	chr6	53756401	53758000	chr6-143	E17
Merged-chr6-53777786-2	chr6	53777401	53778000	chr6-144	E5
Merged-chr6-55871080-2	chr6	55860801	55879800	chr6-146	E16
Merged-chr6-56776626-2	chr6	56776401	56776800	chr6-147	E7
Merged-chr6-61333446-2	chr6	61330601	61334600	chr6-148	E17
Merged-chr6-71302626-2	chr6	71302401	71302800	chr6-149	E3
Merged-chr6-87937663-2	chr6	87937601	87937800	chr6-150	E3
Merged-chr6-92911727-2	chr6	92911001	92912600	chr6-151	E17
Merged-chr6-93883511-2	chr6	93880401	93889400	chr6-152	E10
Merged-chr6-102737362-2	chr6	102737001	102737600	chr6-153	E15
Merged-chr6-113226908-2	chr6	113226801	113227000	chr6-154	E5
Merged-chr6-115123433-2	chr6	115123201	115123600	chr6-155	E3
Merged-chr6-118066461-2	chr6	118065201	118067200	chr6-157	E2
Merged-chr6-118473423-2	chr6	118470001	118474600	chr6-158	E16
Merged-chr6-119388487-2	chr6	119388201	119388800	chr6-159	E13
Merged-chr6-119418075-2	chr6	119417401	119419600	chr6-160	E13
Merged-chr6-122711660-2	chr6	122711401	122711800	chr6-162	E12
Merged-chr6-127888195-2	chr6	127887601	127888400	chr6-166	E2
Merged-chr6-132157329-2	chr6	132101601	132312400	chr6-168	E16
Merged-chr6-134830422-2	chr6	134830001	134830600	chr6-169	E2
Merged-chr6-136469237-2	chr6	136469001	136469400	chr6-170	E2
Merged-chr6-137751505-2	chr6	137750001	137752200	chr6-171	E9
Merged-chr6-139351088-2	chr6	139350601	139351400	chr6-172	E15
Merged-chr6-144240063-2	chr6	144237401	144243200	chr6-174	E17
Merged-chr6-149315572-2	chr6	149313801	149317200	chr6-175	E11
Merged-chr6-149424678-2	chr6	149414801	149431200	chr6-176	E16
Merged-chr8-32293284-2	chr8	32293201	32293400	chr8-100	E2
Merged-chr8-54076375-2	chr8	54075801	54076800	chr8-101	E13
Merged-chr8-70408539-2	chr8	70408001	70409000	chr8-103	E3
Merged-chr8-70429273-2	chr8	70428401	70430200	chr8-104	E4
Merged-chr8-71464400-2	chr8	71462801	71465600	chr8-105	E2
Merged-chr8-72418511-2	chr8	72418001	72418800	chr8-106	E11
Merged-chr8-72848907-2	chr8	72847401	72852000	chr8-107	E10
Merged-chr8-84194186-2	chr8	84193001	84194600	chr8-108	E13
Merged-chr8-106516057-2	chr8	106516001	106516200	chr8-110	E14
Merged-chr8-122323969-2	chr8	122323401	122324200	chr8-112	E3
Merged-chr8-123413079-2	chr8	123413001	123413200	chr8-113	E2
Merged-chr8-124262290-2	chr8	124262001	124262400	chr8-114	E10
Merged-chr8-124906053-2	chr8	124905201	124907600	chr8-115	E9
Merged-chr8-4217204-2	chr8	4216201	4217600	chr8-116	E2
Merged-chr8-12427489-2	chr8	12426801	12428400	chr8-117	E1
Merged-chr8-14014281-2	chr8	14013001	14015600	chr8-118	E13
Merged-chr8-24433336-2	chr8	24433001	24433600	chr8-119	E14
Merged-chr8-37916504-2	chr8	37916001	37916800	chr8-120	E15
Merged-chr8-39060068-2	chr8	39059801	39060600	chr8-121	E7
Merged-chr8-45235509-2	chr8	45235401	45235800	chr8-122	E14
Merged-chr8-46617124-2	chr8	46617001	46617200	chr8-123	E2
Merged-chr8-70158544-2	chr8	70158201	70159000	chr8-125	E2
Merged-chr8-70647562-2	chr8	70647401	70647800	chr8-126	E2
Merged-chr8-73142888-2	chr8	73142401	73143400	chr8-127	E15
Merged-chr8-79030493-2	chr8	79028601	79031200	chr8-128	E2
Merged-chr8-79079496-2	chr8	79079401	79079600	chr8-129	E14
Merged-chr8-79817665-2	chr8	79816401	79818200	chr8-130	E17
Merged-chr8-83037169-2	chr8	83036801	83038000	chr8-131	E14
Merged-chr8-83293969-2	chr8	83293801	83294200	chr8-132	E5
Merged-chr8-84192340-2	chr8	84192001	84193000	chr8-133	E2
Merged-chr8-85555382-2	chr8	85554801	85555800	chr8-135	E2
Merged-chr8-105926518-2	chr8	105925801	105927800	chr8-138	E7
Merged-chr8-106616028-2	chr8	106614601	106619400	chr8-139	E12
Merged-chr8-110357994-2	chr8	110357601	110358400	chr8-140	E5
Merged-chr8-111803843-2	chr8	111803401	111804800	chr8-143	E14
Merged-chr8-114116308-2	chr8	114115801	114116800	chr8-144	E14
Merged-chr8-114630658-2	chr8	114630401	114630800	chr8-145	E4
Merged-chr8-117314772-2	chr8	117314601	117315000	chr8-146	E3
Merged-chr8-118845780-2	chr8	118845601	118846000	chr8-147	E14
Merged-chr8-120416652-2	chr8	120416401	120417200	chr8-148	E2
Merged-chr8-124286791-2	chr8	124286401	124287400	chr8-149	E3
Merged-chr8-124721915-2	chr8	124721201	124722600	chr8-150	E2
Merged-chr8-125271577-2	chr8	125271201	125272000	chr8-151	E4
Merged-chr8-10224440-2	chr8	10220201	10230800	chr8-152	E17
Merged-chr8-12478197-2	chr8	12477801	12478400	chr8-153	E2
Merged-chr8-13929289-2	chr8	13928801	13929600	chr8-155	E7
Merged-chr8-18516215-2	chr8	18512801	18518200	chr8-156	E17
Merged-chr8-23918488-2	chr8	23918201	23918800	chr8-159	E15
Merged-chr8-25142957-2	chr8	25142801	25143400	chr8-160	E4
Merged-chr8-27174717-2	chr8	27174001	27175400	chr8-161	E2
Merged-chr8-27236497-2	chr8	27235601	27237400	chr8-162	E12
Merged-chr8-40173999-2	chr8	40163801	40177400	chr8-164	E17
Merged-chr8-45063702-2	chr8	45062801	45065000	chr8-165	E13
Merged-chr8-46746744-2	chr8	46743801	46752600	chr8-166	E17
Merged-chr8-53870281-2	chr8	53870001	53870400	chr8-167	E15
Merged-chr8-57257859-2	chr8	57252801	57260600	chr8-168	E17
Merged-chr8-61964752-2	chr8	61964601	61965000	chr8-169	E14
Merged-chr16-93308591-2	chr16	93306801	93309200	chr16-10	E6
Merged-chr16-17209271-2	chr16	17208401	17210800	chr16-12	E2
Merged-chr16-35564685-2	chr16	35564601	35564800	chr16-13	E3
Merged-chr16-17276871-2	chr16	17276201	17278600	chr16-14	E2
Merged-chr16-30155913-2	chr16	30155001	30156400	chr16-15	E14
Merged-chr16-30051025-2	chr16	30050801	30051200	chr16-16	E4
Merged-chr16-32117713-2	chr16	32117001	32118000	chr16-17	E6
Merged-chr16-21679206-2	chr16	21677601	21681200	chr16-18	E6
Merged-chr16-9281324-2	chr16	9280801	9282400	chr16-19	E14
Merged-chr8-68289098-2	chr8	68285201	68290600	chr8-170	E17
Merged-chr8-68386168-2	chr8	68379601	68389800	chr8-171	E17
Merged-chr8-68461339-2	chr8	68461001	68461600	chr8-172	E2
Merged-chr8-70598392-2	chr8	70597601	70599200	chr8-173	E2
Merged-chr8-71334047-2	chr8	71333001	71335000	chr8-174	E7
Merged-chr8-71363948-2	chr8	71363401	71365400	chr8-175	E6
Merged-chr8-72456883-2	chr8	72456601	72457200	chr8-176	E7
Merged-chr8-75195202-2	chr8	75194601	75196000	chr8-177	E14
Merged-chr2-60411464-2	chr2	60409801	60412600	chr2-200	E13
Merged-chr2-74426927-2	chr2	74426801	74427000	chr2-203	E13
Merged-chr2-75687406-2	chr2	75687001	75688200	chr2-204	E12
Merged-chr2-79726761-2	chr2	79724001	79731200	chr2-205	E16
Merged-chr2-91419760-2	chr2	91413601	91424200	chr2-206	E10
Merged-chr16-91067306-2	chr16	91067201	91067400	chr16-21	E4
Merged-chr2-93177872-2	chr2	93177801	93178000	chr2-207	E3
Merged-chr16-82596437-2	chr16	82595601	82597000	chr16-22	E14
Merged-chr2-104589049-2	chr2	104588601	104590000	chr2-208	E12
Merged-chr16-14004371-2	chr16	14004201	14004600	chr16-23	E3
Merged-chr16-30064004-2	chr16	30063001	30064600	chr16-24	E2
Merged-chr16-16823576-2	chr16	16818601	16825400	chr16-25	E17
Merged-chr16-16912076-2	chr16	16911801	16912400	chr16-26	E2
Merged-chr16-22216415-2	chr16	22216201	22216600	chr16-27	E5
Merged-chr16-97488425-2	chr16	97488201	97488600	chr16-29	E5
Merged-chr8-88949923-2	chr8	88949801	88950000	chr8-181	E2
Merged-chr8-89360509-2	chr8	89360201	89360800	chr8-182	E5
Merged-chr8-90244981-2	chr8	90244801	90245200	chr8-183	E5
Merged-chr8-91337568-2	chr8	91335601	91339000	chr8-184	E6
Merged-chr8-96350796-2	chr8	96347401	96359200	chr8-185	E17
Merged-chr8-101996994-2	chr8	101996801	101997200	chr8-186	E15
Merged-chr8-105622451-2	chr8	105622001	105623000	chr8-187	E3
Merged-chr2-126870945-2	chr2	126866001	126874600	chr2-210	E11
Merged-chr2-129544575-2	chr2	129543801	129545000	chr2-212	E6
Merged-chr2-130876196-2	chr2	130876001	130876400	chr2-213	E5
Merged-chr2-131142796-2	chr2	131142401	131143000	chr2-214	E3
Merged-chr2-132781528-2	chr2	132781201	132781800	chr2-215	E2
Merged-chr16-9132563-2	chr16	9131201	9133200	chr16-30	E14
Merged-chr16-20805127-2	chr16	20804401	20805600	chr16-31	E13
Merged-chr2-143963681-2	chr2	143963401	143963800	chr2-217	E9
Merged-chr16-35729305-2	chr16	35729001	35729600	chr16-32	E15
Merged-chr2-148698662-2	chr2	148698401	148699000	chr2-218	E14
Merged-chr2-150608529-2	chr2	150608001	150608800	chr2-219	E2
Merged-chr16-19237789-2	chr16	19237001	19238200	chr16-34	E15
Merged-chr16-31509180-2	chr16	31509001	31509400	chr16-35	E2
Merged-chr16-91818596-2	chr16	91818401	91818800	chr16-36	E2
Merged-chr16-9291591-2	chr16	9291401	9291800	chr16-37	E3
Merged-chr16-13818907-2	chr16	13818601	13819800	chr16-38	E2
Merged-chr16-18724890-2	chr16	18724801	18725000	chr16-39	E3
Merged-chr8-107150663-2	chr8	107150201	107151200	chr8-191	E2
Merged-chr8-109458712-2	chr8	109458601	109459000	chr8-192	E2
Merged-chr8-120520758-2	chr8	120520401	120521000	chr8-194	E2
Merged-chr8-122423404-2	chr8	122423201	122423600	chr8-195	E2
Merged-chr8-122561641-2	chr8	122561401	122561800	chr8-196	E14
Merged-chr8-122709641-2	chr8	122709401	122710200	chr8-197	E3
Merged-chr8-123233504-2	chr8	123233001	123234200	chr8-198	E3
Merged-chr2-156841288-2	chr2	156839201	156842200	chr2-221	E2
Merged-chr2-157290681-2	chr2	157290401	157290800	chr2-222	E8
Merged-chr2-164913534-2	chr2	164913401	164913600	chr2-224	E8
Merged-chr2-165829031-2	chr2	165828601	165829600	chr2-225	E11
Merged-chr16-25407348-2	chr16	25407001	25407800	chr16-40	E15
Merged-chr2-166194291-2	chr2	166194201	166194400	chr2-226	E2
Merged-chr16-11360825-2	chr16	11360601	11361200	chr16-41	E14
Merged-chr2-166489171-2	chr2	166488001	166490000	chr2-227	E3
Merged-chr16-18348129-2	chr16	18347601	18349000	chr16-42	E2
Merged-chr2-166887991-2	chr2	166887801	166888200	chr2-228	E7
Merged-chr16-20611562-2	chr16	20611201	20612000	chr16-43	E2
Merged-chr16-22873605-2	chr16	22873401	22873800	chr16-44	E7
Merged-chr16-30528022-2	chr16	30527801	30528200	chr16-45	E4
Merged-chr16-96758177-2	chr16	96757601	96759600	chr16-46	E13
Merged-chr16-14557280-2	chr16	14556801	14557600	chr16-48	E15
Merged-chr16-35360380-2	chr16	35358801	35361200	chr16-49	E9
Merged-chr2-172522949-2	chr2	172522601	172523200	chr2-230	E2
Merged-chr2-179351015-2	chr2	179350801	179351200	chr2-231	E5
Merged-chr2-8217888-2	chr2	8206001	8251400	chr2-234	E16
Merged-chr2-11822133-2	chr2	11821601	11822600	chr2-235	E16
Merged-chr16-50540314-2	chr16	50540201	50540400	chr16-50	E5
Merged-chr2-17706643-2	chr2	17703201	17711200	chr2-236	E17
Merged-chr16-88701230-2	chr16	88701001	88701600	chr16-51	E15
Merged-chr16-11199261-2	chr16	11198401	11201400	chr16-52	E11
Merged-chr2-18195906-2	chr2	18193401	18199000	chr2-238	E9
Merged-chr16-17792756-2	chr16	17792201	17793000	chr16-53	E4
Merged-chr2-20209517-2	chr2	20209401	20209600	chr2-239	E14
Merged-chr16-32608894-2	chr16	32608601	32609400	chr16-54	E2
Merged-chr16-3256766-2	chr16	3256201	3257000	chr16-56	E6
Merged-chr16-8672092-2	chr16	8671401	8672600	chr16-57	E2
Merged-chr16-29762065-2	chr16	29761801	29762200	chr16-59	E3
Merged-chr2-24088350-2	chr2	24088201	24088600	chr2-240	E15
Merged-chr2-26197159-2	chr2	26196801	26197800	chr2-241	E1
Merged-chr2-26357022-2	chr2	26356801	26357200	chr2-242	E3
Merged-chr2-28523802-2	chr2	28523601	28524200	chr2-244	E3
Merged-chr2-29501829-2	chr2	29501601	29502400	chr2-245	E7
Merged-chr16-83579272-2	chr16	83579001	83579600	chr16-60	E15
Merged-chr16-87700038-2	chr16	87699601	87700200	chr16-61	E13
Merged-chr2-30158283-2	chr2	30157201	30159400	chr2-247	E6
Merged-chr16-90082241-2	chr16	90082001	90082400	chr16-62	E7
Merged-chr2-35084658-2	chr2	35082201	35086000	chr2-248	E17
Merged-chr16-91480860-2	chr16	91480201	91481600	chr16-63	E14
Merged-chr2-38975620-2	chr2	38975401	38976000	chr2-249	E3
Merged-chr16-13671967-2	chr16	13671801	13672400	chr16-66	E2
Merged-chr16-13976654-2	chr16	13976401	13976800	chr16-67	E14
Merged-chr16-17220481-2	chr16	17220201	17220800	chr16-68	E2
Merged-chr16-17497668-2	chr16	17497001	17499400	chr16-69	E6
Merged-chr2-40093793-2	chr2	40092001	40094800	chr2-250	E16
Merged-chr2-46188573-2	chr2	46171801	46195200	chr2-251	E16
Merged-chr2-50105363-2	chr2	50101601	50108400	chr2-252	E17
Merged-chr2-53208254-2	chr2	53198801	53214600	chr2-253	E9
Merged-chr16-17671338-2	chr16	17670601	17671600	chr16-70	E9
Merged-chr2-70878272-2	chr2	70877601	70880200	chr2-256	E17
Merged-chr16-30646305-2	chr16	30646201	30646400	chr16-71	E14
Merged-chr2-72383938-2	chr2	72383801	72384000	chr2-257	E7
Merged-chr16-71240702-2	chr16	71238401	71246200	chr16-72	E16
Merged-chr2-72516344-2	chr2	72515601	72516800	chr2-258	E13
Merged-chr16-93684652-2	chr16	93684601	93684800	chr16-73	E12
Merged-chr16-3884560-2	chr16	3884001	3885200	chr16-75	E2
Merged-chr16-4602658-2	chr16	4602201	4603600	chr16-76	E2
Merged-chr16-11066632-2	chr16	11066001	11067200	chr16-78	E2
Merged-chr16-13892463-2	chr16	13890601	13895800	chr16-79	E10
Merged-chr2-77366278-2	chr2	77364201	77369200	chr2-261	E17
Merged-chr2-84445729-2	chr2	84440401	84450800	chr2-262	E10
Merged-chr2-90807059-2	chr2	90806001	90809800	chr2-263	E6
Merged-chr2-92096980-2	chr2	92096801	92097200	chr2-264	E14
Merged-chr2-92182481-2	chr2	92182201	92183000	chr2-265	E13
Merged-chr16-17500416-2	chr16	17499801	17501200	chr16-80	E4
Merged-chr16-18218884-2	chr16	18218601	18219200	chr16-81	E3
Merged-chr2-104044169-2	chr2	104041601	104051400	chr2-268	E10
Merged-chr16-20990819-2	chr16	20988801	20993000	chr16-83	E18
Merged-chr16-22955877-2	chr16	22955801	22956000	chr16-84	E13
Merged-chr16-24943766-2	chr16	24943401	24944000	chr16-85	E15
Merged-chr16-30940069-2	chr16	30940001	30940200	chr16-86	E14
Merged-chr16-32303076-2	chr16	32301801	32303800	chr16-88	E13
Merged-chr16-32820634-2	chr16	32819201	32821800	chr16-89	E6
Merged-chr2-106888171-2	chr2	106883601	106891000	chr2-270	E17
Merged-chr2-119336984-2	chr2	119335801	119337400	chr2-272	E1
Merged-chr2-119797463-2	chr2	119797201	119798200	chr2-273	E14
Merged-chr2-119857432-2	chr2	119857001	119857600	chr2-274	E13
Merged-chr16-34405791-2	chr16	34400801	34413400	chr16-90	E17
Merged-chr2-128152820-2	chr2	128152601	128153000	chr2-276	E2
Merged-chr16-36703312-2	chr16	36702601	36704600	chr16-91	E6
Merged-chr2-129318067-2	chr2	129318001	129318200	chr2-277	E5
Merged-chr16-45304907-2	chr16	45304601	45305400	chr16-92	E15
Merged-chr16-55322000-2	chr16	55321601	55322200	chr16-93	E15
Merged-chr2-132992709-2	chr2	132992401	132993000	chr2-279	E5
Merged-chr16-57398645-2	chr16	57398201	57399000	chr16-94	E15
Merged-chr16-65662803-2	chr16	65661001	65664600	chr16-95	E17
Merged-chr16-88720376-2	chr16	88719801	88721200	chr16-96	E15
Merged-chr16-89954625-2	chr16	89954001	89955200	chr16-97	E13
Merged-chr16-93586686-2	chr16	93586601	93586800	chr16-99	E3
Merged-chr2-133596776-2	chr2	133596601	133597000	chr2-280	E15
Merged-chr2-142303616-2	chr2	142303201	142304200	chr2-283	E15
Merged-chr2-143022670-2	chr2	143022401	143022800	chr2-284	E15
Merged-chr2-144677119-2	chr2	144677001	144677400	chr2-287	E3
Merged-chr2-146608587-2	chr2	146607601	146611000	chr2-288	E17
Merged-chr2-150909773-2	chr2	150909601	150910000	chr2-289	E2
Merged-chr2-151485793-2	chr2	151485401	151486400	chr2-290	E17
Merged-chr2-154130415-2	chr2	154130001	154130800	chr2-293	E5
Merged-chr2-155314957-2	chr2	155314001	155316200	chr2-294	E10
Merged-chr2-156199589-2	chr2	156197201	156201000	chr2-295	E12
Merged-chr2-157533106-2	chr2	157532801	157533600	chr2-297	E4
Merged-chr2-157944079-2	chr2	157943401	157944800	chr2-299	E2
Merged-chr4-94752615-2	chr4	94752401	94752800	chr4-200	E3
Merged-chr4-95967199-2	chr4	95966801	95967800	chr4-201	E2
Merged-chr4-108907643-2	chr4	108907401	108907800	chr4-203	E15
Merged-chr4-114459852-2	chr4	114459601	114460200	chr4-204	E5
Merged-chr4-119694252-2	chr4	119693001	119697400	chr4-205	E17
Merged-chr4-134920154-2	chr4	134919401	134920800	chr4-208	E14
Merged-chr4-136031702-2	chr4	136031001	136032000	chr4-209	E3
Merged-chr4-136801620-2	chr4	136801401	136801800	chr4-210	E3
Merged-chr4-137578557-2	chr4	137578201	137578800	chr4-211	E2
Merged-chr4-138537448-2	chr4	138537201	138537800	chr4-212	E4
Merged-chr4-140273338-2	chr4	140272601	140274000	chr4-213	E17
Merged-chr4-146536253-2	chr4	146536001	146536400	chr4-224	E8
Merged-chr4-147492520-2	chr4	147492401	147492600	chr4-228	E13
Merged-chr12-111136159-2	chr12	111135801	111136600	chr12-10	E4
Merged-chr12-104534783-2	chr12	104534601	104535000	chr12-11	E4
Merged-chr12-111696452-2	chr12	111696401	111696600	chr12-13	E4
Merged-chr12-64902681-2	chr12	64902401	64902800	chr12-14	E5
Merged-chr12-80213945-2	chr12	80213601	80214200	chr12-15	E8
Merged-chr4-148102314-2	chr4	148102201	148102600	chr4-231	E2
Merged-chr12-99066823-2	chr12	99064601	99068000	chr12-16	E17
Merged-chr4-150229957-2	chr4	150229601	150230400	chr4-232	E14
Merged-chr12-40917665-2	chr12	40917201	40918200	chr12-17	E13
Merged-chr12-84729800-2	chr12	84729601	84730000	chr12-18	E4
Merged-chr4-152290693-2	chr4	152290201	152291200	chr4-234	E2
Merged-chr12-99272841-2	chr12	99272001	99273400	chr12-19	E10
Merged-chr4-153603067-2	chr4	153602001	153603600	chr4-235	E4
Merged-chr4-154099331-2	chr4	154098601	154099600	chr4-236	E4
Merged-chr4-155189942-2	chr4	155189601	155190400	chr4-237	E2
Merged-chr4-3835527-2	chr4	3835201	3836000	chr4-239	E2
Merged-chr12-86466150-2	chr12	86465401	86466400	chr12-20	E11
Merged-chr12-113140611-2	chr12	113139801	113141800	chr12-21	E2
Merged-chr12-104645048-2	chr12	104644801	104645600	chr12-22	E5
Merged-chr12-27140542-2	chr12	27140401	27140800	chr12-23	E3
Merged-chr4-4424782-2	chr4	4424601	4425000	chr4-240	E15
Merged-chr12-72649965-2	chr12	72649401	72650400	chr12-25	E13
Merged-chr4-8342704-2	chr4	8337601	8346600	chr4-241	E17
Merged-chr12-99068193-2	chr12	99068001	99068400	chr12-26	E15
Merged-chr4-9725082-2	chr4	9724201	9726200	chr4-242	E18
Merged-chr12-102189044-2	chr12	102187401	102190600	chr12-27	E6
Merged-chr12-100338052-2	chr12	100337801	100338600	chr12-28	E14
Merged-chr12-21167881-2	chr12	21167601	21168000	chr12-29	E2
Merged-chr4-35019320-2	chr4	35019201	35019600	chr4-247	E15
Merged-chr4-35145384-2	chr4	35145001	35145600	chr4-248	E17
Merged-chr12-41729910-2	chr12	41729401	41730200	chr12-30	E14
Merged-chr12-27724812-2	chr12	27724601	27725000	chr12-32	E15
Merged-chr12-99301089-2	chr12	99299001	99305000	chr12-33	E1
Merged-chr12-100407339-2	chr12	100406601	100407800	chr12-34	E14
Merged-chr4-38911877-2	chr4	38900401	38939600	chr4-250	E16
Merged-chr12-79548035-2	chr12	79545801	79548800	chr12-35	E10
Merged-chr12-84625358-2	chr12	84625201	84625800	chr12-36	E2
Merged-chr4-43978903-2	chr4	43978801	43979200	chr4-252	E13
Merged-chr12-25144799-2	chr12	25144201	25145400	chr12-37	E14
Merged-chr12-25475601-2	chr12	25475401	25475800	chr12-38	E3
Merged-chr4-45763929-2	chr4	45763401	45764200	chr4-254	E2
Merged-chr12-26068343-2	chr12	26068001	26068800	chr12-39	E3
Merged-chr4-48043032-2	chr4	48042601	48043800	chr4-255	E2
Merged-chr4-48186738-2	chr4	48185601	48188000	chr4-256	E17
Merged-chr4-50717797-2	chr4	50700601	50735200	chr4-257	E16
Merged-chr4-54992374-2	chr4	54991601	54993000	chr4-259	E12
Merged-chr12-31059707-2	chr12	31059601	31059800	chr12-40	E15
Merged-chr12-82616982-2	chr12	82616401	82617800	chr12-42	E2
Merged-chr12-86497789-2	chr12	86493801	86499600	chr12-43	E12
Merged-chr12-98737691-2	chr12	98737201	98738200	chr12-44	E2
Merged-chr4-57720427-2	chr4	57720201	57720600	chr4-260	E6
Merged-chr12-100202263-2	chr12	100202001	100203000	chr12-45	E11
Merged-chr4-58781222-2	chr4	58778001	58785200	chr4-261	E16
Merged-chr12-3691375-2	chr12	3690801	3692000	chr12-46	E13
Merged-chr4-59505858-2	chr4	59503001	59508200	chr4-262	E10
Merged-chr12-27065184-2	chr12	27065001	27065400	chr12-47	E3
Merged-chr12-25093053-2	chr12	25092401	25093600	chr12-48	E2
Merged-chr12-36933335-2	chr12	36933001	36933600	chr12-49	E15
Merged-chr4-62511699-2	chr4	62511401	62512000	chr4-265	E8
Merged-chr4-81008824-2	chr4	81001001	81013400	chr4-266	E16
Merged-chr4-81103413-2	chr4	81095601	81107600	chr4-267	E16
Merged-chr4-101889884-2	chr4	101888601	101891600	chr4-268	E14
Merged-chr4-107692242-2	chr4	107690001	107695000	chr4-269	E6
Merged-chr12-86492992-2	chr12	86491401	86493600	chr12-51	E12
Merged-chr12-100168228-2	chr12	100167801	100168400	chr12-52	E13
Merged-chr12-102224360-2	chr12	102224201	102224600	chr12-53	E5
Merged-chr12-17661752-2	chr12	17661601	17662000	chr12-54	E3
Merged-chr4-115117554-2	chr4	115113601	115123400	chr4-270	E17
Merged-chr12-26315217-2	chr12	26315001	26315400	chr12-55	E15
Merged-chr12-28972144-2	chr12	28972001	28972200	chr12-56	E5
Merged-chr4-117893210-2	chr4	117892401	117893600	chr4-272	E10
Merged-chr12-40995995-2	chr12	40995801	40996400	chr12-57	E12
Merged-chr4-123593563-2	chr4	123592401	123594000	chr4-274	E11
Merged-chr12-73089741-2	chr12	73089001	73091800	chr12-59	E14
Merged-chr4-124649720-2	chr4	124649401	124650000	chr4-276	E6
Merged-chr4-125030218-2	chr4	125029801	125030400	chr4-277	E2
Merged-chr4-125079725-2	chr4	125078201	125081600	chr4-278	E10
Merged-chr4-125118377-2	chr4	125118201	125118800	chr4-279	E14
Merged-chr11-100616383-2	chr11	100615601	100616800	chr11-400	E12
Merged-chr11-101682142-2	chr11	101681801	101682600	chr11-401	E14
Merged-chr11-102206748-2	chr11	102206401	102207200	chr11-403	E2
Merged-chr11-102826901-2	chr11	102826601	102827400	chr11-405	E14
Merged-chr11-107135696-2	chr11	107134801	107136000	chr11-406	E14
Merged-chr11-107223300-2	chr11	107222801	107224000	chr11-407	E10
Merged-chr11-108095602-2	chr11	108091001	108101000	chr11-408	E17
Merged-chr11-112912791-2	chr11	112905601	112919400	chr11-409	E17
Merged-chr12-76547959-2	chr12	76547601	76548200	chr12-60	E2
Merged-chr12-99220591-2	chr12	99220401	99220800	chr12-61	E7
Merged-chr12-102597322-2	chr12	102596001	102597800	chr12-62	E8
Merged-chr12-102787931-2	chr12	102787601	102788200	chr12-63	E8
Merged-chr12-108293044-2	chr12	108292601	108293200	chr12-64	E13
Merged-chr12-108452968-2	chr12	108452801	108453400	chr12-65	E6
Merged-chr4-127600145-2	chr4	127599401	127600400	chr4-282	E6
Merged-chr12-3603237-2	chr12	3602801	3604200	chr12-67	E14
Merged-chr4-128205172-2	chr4	128205001	128205400	chr4-283	E5
Merged-chr12-24735094-2	chr12	24734801	24735200	chr12-68	E3
Merged-chr4-129179722-2	chr4	129175401	129183200	chr4-284	E9
Merged-chr12-69229485-2	chr12	69229201	69229800	chr12-69	E14
Merged-chr4-133040663-2	chr4	133040401	133040800	chr4-285	E2
Merged-chr4-133339216-2	chr4	133338801	133339600	chr4-286	E2
Merged-chr4-134430660-2	chr4	134430401	134431000	chr4-287	E3
Merged-chr4-135206400-2	chr4	135206001	135206600	chr4-289	E2
Merged-chr11-112921415-2	chr11	112920001	112925000	chr11-410	E17
Merged-chr11-115884465-2	chr11	115884401	115884600	chr11-411	E3
Merged-chr11-117934581-2	chr11	117934001	117935400	chr11-415	E2
Merged-chr11-119053353-2	chr11	119052801	119054200	chr11-417	E2
Merged-chr11-120070215-2	chr11	120069401	120071800	chr11-418	E8
Merged-chr12-82298781-2	chr12	82297601	82299800	chr12-70	E10
Merged-chr12-86167445-2	chr12	86167201	86167800	chr12-71	E3
Merged-chr12-93918854-2	chr12	93915001	93930200	chr12-73	E16
Merged-chr12-101831339-2	chr12	101831201	101831400	chr12-74	E4
Merged-chr4-135287779-2	chr4	135287401	135288600	chr4-290	E14
Merged-chr4-135455155-2	chr4	135455001	135455400	chr4-291	E3
Merged-chr4-136178032-2	chr4	136177801	136178600	chr4-292	E2
Merged-chr12-3889833-2	chr12	3889201	3890400	chr12-77	E13
Merged-chr4-136370557-2	chr4	136368201	136373800	chr4-293	E6
Merged-chr4-136698854-2	chr4	136698201	136699400	chr4-294	E4
Merged-chr12-29096125-2	chr12	29096001	29096200	chr12-79	E14
Merged-chr4-137466308-2	chr4	137465801	137466800	chr4-295	E6
Merged-chr4-138729439-2	chr4	138729201	138729600	chr4-296	E4
Merged-chr4-140958309-2	chr4	140958001	140959200	chr4-298	E14
Merged-chr12-51911316-2	chr12	51910201	51912000	chr12-80	E10
Merged-chr12-80736724-2	chr12	80736001	80737200	chr12-83	E4
Merged-chr12-83972279-2	chr12	83972201	83972400	chr12-84	E5
Merged-chr12-84153340-2	chr12	84153201	84153400	chr12-85	E9
Merged-chr12-86804421-2	chr12	86802801	86805000	chr12-87	E14
Merged-chr12-89827415-2	chr12	89818401	89841000	chr12-88	E16
Merged-chr12-99306295-2	chr12	99306201	99306400	chr12-89	E7
Merged-chr12-105006851-2	chr12	105006801	105007000	chr12-90	E6
Merged-chr12-105101119-2	chr12	105100601	105101800	chr12-91	E1
Merged-chr12-111953892-2	chr12	111952401	111955200	chr12-92	E6
Merged-chr12-116405321-2	chr12	116405001	116406000	chr12-94	E2
Merged-chr12-3470802-2	chr12	3462201	3479000	chr12-95	E9
Merged-chr12-6595764-2	chr12	6595201	6596400	chr12-96	E14
Merged-chr12-16870133-2	chr12	16870001	16870200	chr12-98	E4
Merged-chr8-124750517-2	chr8	124749801	124751000	chr8-201	E1
Merged-chr8-125185097-2	chr8	125184801	125185200	chr8-202	E14
Merged-chr8-126000343-2	chr8	125999601	126001200	chr8-203	E14
Merged-chr8-126914079-2	chr8	126914001	126914200	chr8-204	E4
Merged-chr8-128109974-2	chr8	128109801	128110200	chr8-205	E15
Merged-chr8-128710932-2	chr8	128709001	128714800	chr8-206	E9
Merged-chrX-103925885-2	chrX	103915201	103943200	chrX-10	E16
Merged-chrX-105909813-2	chrX	105904401	105911800	chrX-11	E10
Merged-chrX-12032194-2	chrX	12032001	12032400	chrX-13	E15
Merged-chrX-20356493-2	chrX	20356001	20357200	chrX-14	E14
Merged-chrX-48433437-2	chrX	48433201	48433800	chrX-15	E2
Merged-chrX-95881292-2	chrX	95881001	95881600	chrX-16	E15
Merged-chrX-134746655-2	chrX	134746201	134747000	chrX-17	E15
Merged-chrX-166803424-2	chrX	166803201	166803800	chrX-18	E15
Merged-chrX-12322920-2	chrX	12313001	12340600	chrX-19	E16
Merged-chrX-142438118-2	chrX	142437601	142438400	chrX-20	E15
Merged-chrX-11466308-2	chrX	11466201	11466400	chrX-21	E5
Merged-chrX-101260633-2	chrX	101260401	101260800	chrX-22	E13
Merged-chrX-136774364-2	chrX	136761801	136779200	chrX-24	E16
Merged-chrX-12840341-2	chrX	12839201	12841400	chrX-26	E13
Merged-chrX-36929983-2	chrX	36929801	36930200	chrX-27	E15
Merged-chrX-50968728-2	chrX	50968401	50969000	chrX-28	E15
Merged-chrX-68492199-2	chrX	68491401	68493000	chrX-29	E15
Merged-chr2-163033217-2	chr2	163032201	163034800	chr2-301	E12
Merged-chr2-163090354-2	chr2	163090001	163090600	chr2-303	E14
Merged-chr2-164021026-2	chr2	164020201	164022000	chr2-304	E10
Merged-chr2-165317584-2	chr2	165317201	165318000	chr2-305	E3
Merged-chr2-166980538-2	chr2	166978001	166983400	chr2-307	E10
Merged-chr2-168950514-2	chr2	168948801	168951400	chr2-308	E9
Merged-chr2-173732214-2	chr2	173730201	173733200	chr2-310	E5
Merged-chr2-178634350-2	chr2	178633801	178634800	chr2-311	E14
Merged-chr2-179395542-2	chr2	179395201	179395800	chr2-312	E5
Merged-chr2-180024904-2	chr2	180024201	180026200	chr2-313	E2
Merged-chr2-180694712-2	chr2	180690601	180700600	chr2-314	E11
Merged-chr2-181241159-2	chr2	181241001	181241400	chr2-315	E4
Merged-chr4-144895100-2	chr4	144894801	144895600	chr4-301	E1
Merged-chr4-145194333-2	chr4	145194001	145195000	chr4-302	E2
Merged-chrX-83487179-2	chrX	83486801	83488000	chrX-2	E15
Merged-chrX-143543432-2	chrX	143542801	143544200	chrX-5	E15
Merged-chrX-153119092-2	chrX	153118401	153119600	chrX-7	E13
Merged-chrX-156303928-2	chrX	156303201	156304600	chrX-8	E15
Merged-chrX-103759467-2	chrX	103741401	103769800	chrX-9	E16
Merged-chr4-147608468-2	chr4	147607801	147609000	chr4-324	E10
Merged-chr4-148086082-2	chr4	148084801	148087600	chr4-325	E12
Merged-chr4-148768100-2	chr4	148768001	148768200	chr4-326	E14
Merged-chr4-154299967-2	chr4	154299401	154300400	chr4-329	E2
Merged-chr4-155163503-2	chr4	155163201	155164000	chr4-331	E2
Merged-chr10-41404470-2	chr10	41404401	41404600	chr10-1	E4
Merged-chr10-85327635-2	chr10	85324801	85329400	chr10-2	E17
Merged-chr10-77847611-2	chr10	77847001	77848000	chr10-3	E4
Merged-chr10-125906648-2	chr10	125906401	125906800	chr10-4	E5
Merged-chr10-8287488-2	chr10	8287201	8287800	chr10-5	E3
Merged-chr10-90904826-2	chr10	90903401	90907200	chr10-6	E17
Merged-chr10-28801086-2	chr10	28801001	28801200	chr10-7	E5
Merged-chr10-42163831-2	chr10	42163601	42164000	chr10-8	E5
Merged-chr10-44730945-2	chr10	44730801	44731200	chr10-9	E15
Merged-chr11-70724734-2	chr11	70724401	70725400	chr11-1	E8
Merged-chr11-76329031-2	chr11	76328801	76329200	chr11-2	E4
Merged-chr11-35610406-2	chr11	35610201	35610800	chr11-3	E4
Merged-chr11-117451783-2	chr11	117451601	117452000	chr11-5	E4
Merged-chr11-99658619-2	chr11	99658401	99658800	chr11-6	E3
Merged-chr11-96929274-2	chr11	96928801	96929600	chr11-7	E2
Merged-chr11-3145203-2	chr11	3141601	3149000	chr11-8	E2
Merged-chr12-100304722-2	chr12	100304001	100306000	chr12-1	E7
Merged-chr12-112206647-2	chr12	112205201	112207800	chr12-2	E4
Merged-chr12-105550452-2	chr12	105549201	105551400	chr12-3	E6
Merged-chr12-29130209-2	chr12	29130001	29130400	chr12-5	E5
Merged-chr12-102344466-2	chr12	102343801	102344800	chr12-6	E6
Merged-chr12-54326680-2	chr12	54326401	54326800	chr12-7	E5
Merged-chr12-28817803-2	chr12	28817401	28818800	chr12-8	E14
Merged-chr12-51166445-2	chr12	51165401	51168000	chr12-9	E17
Merged-chr8-13503473-2	chr8	13503001	13504000	chr8-10	E17
Merged-chr8-111452185-2	chr8	111452001	111452600	chr8-11	E7
Merged-chr8-89003123-2	chr8	89000401	89005000	chr8-12	E13
Merged-chr8-105834217-2	chr8	105833801	105835200	chr8-13	E6
Merged-chr8-27204491-2	chr8	27204401	27204600	chr8-14	E4
Merged-chr8-80872895-2	chr8	80872601	80873000	chr8-15	E3
Merged-chr8-108744260-2	chr8	108744201	108744400	chr8-16	E7
Merged-chr8-69121672-2	chr8	69121401	69122000	chr8-17	E2
Merged-chr8-106136087-2	chr8	106135201	106138600	chr8-18	E2
Merged-chr8-106619781-2	chr8	106619401	106620400	chr8-19	E2
Merged-chr8-84011321-2	chr8	84010401	84013200	chr8-20	E2
Merged-chr8-122460752-2	chr8	122460001	122461400	chr8-21	E2
Merged-chr8-10060618-2	chr8	10057401	10062800	chr8-22	E17
Merged-chr8-84351117-2	chr8	84350601	84351600	chr8-23	E4
Merged-chr8-122698579-2	chr8	122697601	122699600	chr8-24	E3
Merged-chr8-72591000-2	chr8	72590201	72592200	chr8-25	E10
Merged-chr8-88267226-2	chr8	88267001	88267400	chr8-26	E3
Merged-chr8-94186957-2	chr8	94186401	94188000	chr8-27	E2
Merged-chr8-108715091-2	chr8	108713801	108715800	chr8-28	E2
Merged-chr8-111360398-2	chr8	111360001	111360800	chr8-29	E14
Merged-chr8-41785966-2	chr8	41784401	41787200	chr8-31	E16
Merged-chr8-92011204-2	chr8	92011001	92011400	chr8-32	E4
Merged-chr8-84039653-2	chr8	84039601	84039800	chr8-34	E4
Merged-chr8-87571056-2	chr8	87570801	87571200	chr8-35	E13
Merged-chr8-47736313-2	chr8	47733201	47740600	chr8-36	E6
Merged-chr8-106965186-2	chr8	106964601	106966800	chr8-37	E11
Merged-chr8-118850629-2	chr8	118850401	118850800	chr8-38	E15
Merged-chr8-70181885-2	chr8	70181201	70182200	chr8-40	E3
Merged-chr8-110724696-2	chr8	110722801	110726600	chr8-41	E4
Merged-chr8-111693341-2	chr8	111693201	111693400	chr8-42	E14
Merged-chr8-120376750-2	chr8	120376201	120378000	chr8-43	E3
Merged-chr8-122727083-2	chr8	122727001	122727200	chr8-44	E3
Merged-chr8-3464572-2	chr8	3464401	3464800	chr8-46	E6
Merged-chr8-90670908-2	chr8	90670401	90671400	chr8-48	E13
Merged-chr8-36519885-2	chr8	36519801	36520000	chr8-52	E3
Merged-chr8-68368497-2	chr8	68368401	68368600	chr8-53	E3
Merged-chr8-13786046-2	chr8	13785201	13786600	chr8-54	E2
Merged-chr8-13948653-2	chr8	13948601	13948800	chr8-55	E14
Merged-chr8-33626096-2	chr8	33625801	33626400	chr8-57	E13
Merged-chr8-41374614-2	chr8	41374201	41375000	chr8-58	E2
Merged-chr8-71375908-2	chr8	71375401	71376600	chr8-59	E2
Merged-chr8-78147892-2	chr8	78147201	78149200	chr8-60	E13
Merged-chr8-107448064-2	chr8	107447801	107448600	chr8-61	E14
Merged-chr8-122523780-2	chr8	122522801	122525400	chr8-62	E2
Merged-chr8-123524115-2	chr8	123524001	123524400	chr8-63	E3
Merged-chr8-4205822-2	chr8	4205401	4207000	chr8-64	E2
Merged-chr8-44959874-2	chr8	44959401	44960800	chr8-65	E12
Merged-chr8-69939261-2	chr8	69936801	69940600	chr8-66	E12
Merged-chr8-84660288-2	chr8	84660001	84660400	chr8-67	E2
Merged-chr8-89032656-2	chr8	89032401	89033000	chr8-69	E2
Merged-chr8-94172471-2	chr8	94171401	94173600	chr8-70	E2
Merged-chr8-112033525-2	chr8	112032401	112035200	chr8-71	E14
Merged-chr8-118286110-2	chr8	118286001	118286200	chr8-72	E1
Merged-chr8-3395335-2	chr8	3394801	3395800	chr8-73	E13
Merged-chr8-45999536-2	chr8	45999201	46000400	chr8-74	E2
Merged-chr8-71569694-2	chr8	71568601	71571000	chr8-75	E2
Merged-chr8-79546111-2	chr8	79546001	79546200	chr8-76	E14
Merged-chr8-105259592-2	chr8	105258601	105260200	chr8-77	E2
Merged-chr8-107436436-2	chr8	107436201	107437000	chr8-78	E2
Merged-chr8-107876598-2	chr8	107876401	107876800	chr8-79	E15
Merged-chr8-119851549-2	chr8	119849601	119852800	chr8-80	E6
Merged-chr8-126791192-2	chr8	126791001	126791400	chr8-82	E5
Merged-chr8-23936021-2	chr8	23934601	23939800	chr8-83	E17
Merged-chr8-46584516-2	chr8	46584401	46584600	chr8-84	E15
Merged-chr8-70523039-2	chr8	70522801	70523200	chr8-85	E2
Merged-chr8-75093709-2	chr8	75093601	75094000	chr8-87	E2
Merged-chr8-89063636-2	chr8	89063201	89064200	chr8-88	E13
Merged-chr8-106534408-2	chr8	106533601	106534800	chr8-89	E14
Merged-chr8-110488409-2	chr8	110488001	110488600	chr8-90	E4
Merged-chr8-119440205-2	chr8	119440001	119440600	chr8-91	E3
Merged-chr8-120276446-2	chr8	120276001	120277600	chr8-92	E2
Merged-chr8-123994084-2	chr8	123992601	123995200	chr8-93	E12
Merged-chr8-126839220-2	chr8	126838601	126840000	chr8-94	E3
Merged-chr8-11258813-2	chr8	11257601	11259800	chr8-95	E6
Merged-chr8-12697018-2	chr8	12696201	12698600	chr8-96	E6
Merged-chr8-18739222-2	chr8	18739001	18739600	chr8-97	E3
Merged-chr4-151325749-2	chr4	151325601	151326000	chr4-10	E4
Merged-chr4-140575051-2	chr4	140574801	140575200	chr4-11	E6
Merged-chr4-49838048-2	chr4	49837801	49838200	chr4-12	E15
Merged-chr4-131284247-2	chr4	131283601	131285600	chr4-13	E4
Merged-chr4-145556852-2	chr4	145556801	145557000	chr4-14	E3
Merged-chr4-138883894-2	chr4	138883801	138884000	chr4-15	E4
Merged-chr4-119395974-2	chr4	119395401	119397200	chr4-16	E17
Merged-chr4-57855479-2	chr4	57854801	57856000	chr4-17	E8
Merged-chr4-133896569-2	chr4	133896001	133897000	chr4-18	E14
Merged-chr4-45140479-2	chr4	45140001	45141800	chr4-19	E6
Merged-chr4-132155493-2	chr4	132155201	132155800	chr4-20	E13
Merged-chr4-129862543-2	chr4	129862401	129862600	chr4-21	E4
Merged-chr4-153806406-2	chr4	153805801	153807000	chr4-22	E3
Merged-chr4-154183356-2	chr4	154182601	154184200	chr4-23	E6
Merged-chr4-13300369-2	chr4	13300001	13300800	chr4-24	E15
Merged-chr4-120071744-2	chr4	120070801	120072600	chr4-25	E4
Merged-chr4-142235078-2	chr4	142234601	142235600	chr4-26	E13
Merged-chr4-11053920-2	chr4	11053801	11054000	chr4-27	E14
Merged-chr4-45184886-2	chr4	45184401	45185600	chr4-28	E2
Merged-chr4-131912999-2	chr4	131911401	131915000	chr4-29	E1
Merged-chr4-130283065-2	chr4	130283001	130283200	chr4-30	E4
Merged-chr4-129577285-2	chr4	129577201	129577400	chr4-31	E3
Merged-chr4-130520016-2	chr4	130519801	130520200	chr4-32	E2
Merged-chr4-48036651-2	chr4	48034601	48039200	chr4-33	E17
Merged-chr4-138690601-2	chr4	138690201	138690800	chr4-34	E3
Merged-chr4-80911853-2	chr4	80911001	80912200	chr4-35	E2
Merged-chr4-115918203-2	chr4	115917801	115918600	chr4-36	E2
Merged-chr4-140049485-2	chr4	140049401	140049600	chr4-37	E4
Merged-chr4-117132099-2	chr4	117132001	117132200	chr4-38	E3
Merged-chr4-129113036-2	chr4	129112201	129113400	chr4-39	E3
Merged-chr4-138418504-2	chr4	138418401	138418600	chr4-40	E3
Merged-chr4-155173739-2	chr4	155173601	155174000	chr4-41	E2
Merged-chr4-130102425-2	chr4	130102201	130102600	chr4-42	E1
Merged-chr4-94557039-2	chr4	94556801	94557600	chr4-44	E13
Merged-chr4-6093679-2	chr4	6093401	6094200	chr4-46	E15
Merged-chr4-8799690-2	chr4	8799601	8799800	chr4-47	E7
Merged-chr4-142384072-2	chr4	142383201	142386200	chr4-48	E17
Merged-chr4-45588571-2	chr4	45588001	45589200	chr4-49	E14
Merged-chr4-57690900-2	chr4	57690801	57691000	chr4-50	E3
Merged-chr4-105214531-2	chr4	105214001	105214800	chr4-52	E14
Merged-chr4-142523588-2	chr4	142523401	142523800	chr4-53	E5
Merged-chr4-148088060-2	chr4	148087601	148088400	chr4-54	E2
Merged-chr4-149445440-2	chr4	149445201	149445600	chr4-55	E2
Merged-chr4-151921869-2	chr4	151920601	151922400	chr4-56	E18
Merged-chr4-10932497-2	chr4	10932201	10932600	chr4-57	E14
Merged-chr4-59610657-2	chr4	59610601	59610800	chr4-58	E5
Merged-chr4-126248903-2	chr4	126248601	126249600	chr4-59	E11
Merged-chr4-136146810-2	chr4	136146401	136147200	chr4-60	E1
Merged-chr4-138410223-2	chr4	138406801	138411600	chr4-61	E1
Merged-chr4-26944801-2	chr4	26944201	26945400	chr4-64	E14
Merged-chr4-34239804-2	chr4	34239601	34240000	chr4-66	E5
Merged-chr4-124317260-2	chr4	124317001	124317600	chr4-67	E5
Merged-chr4-124709080-2	chr4	124708601	124709600	chr4-68	E2
Merged-chr4-125946100-2	chr4	125945401	125946600	chr4-69	E4
Merged-chr4-133816260-2	chr4	133814801	133817800	chr4-70	E13
Merged-chr4-69103758-2	chr4	69096401	69120000	chr4-72	E16
Merged-chr4-105169824-2	chr4	105169401	105170000	chr4-73	E14
Merged-chr4-116721091-2	chr4	116720801	116721600	chr4-74	E2
Merged-chr4-118207120-2	chr4	118206001	118207600	chr4-75	E7
Merged-chr4-123624576-2	chr4	123624401	123624800	chr4-76	E13
Merged-chr4-133660391-2	chr4	133660001	133660800	chr4-77	E2
Merged-chr4-134477873-2	chr4	134476601	134478400	chr4-78	E7
Merged-chr4-136081854-2	chr4	136081601	136082200	chr4-79	E2
Merged-chr4-141571471-2	chr4	141571001	141571800	chr4-80	E2
Merged-chr4-8750934-2	chr4	8750401	8751400	chr4-81	E14
Merged-chr4-43795661-2	chr4	43794601	43796200	chr4-82	E14
Merged-chr4-43957708-2	chr4	43957001	43958600	chr4-83	E2
Merged-chr4-45490129-2	chr4	45489801	45490400	chr4-84	E13
Merged-chr4-130630667-2	chr4	130630401	130630800	chr4-85	E13
Merged-chr4-131060741-2	chr4	131060201	131061000	chr4-86	E4
Merged-chr4-135272930-2	chr4	135272001	135273600	chr4-87	E2
Merged-chr4-136089304-2	chr4	136088801	136090000	chr4-88	E3
Merged-chr4-140103683-2	chr4	140103401	140103800	chr4-89	E2
Merged-chr4-143162262-2	chr4	143162201	143162400	chr4-90	E3
Merged-chr4-40221141-2	chr4	40221001	40221200	chr4-92	E14
Merged-chr4-55203870-2	chr4	55203601	55204000	chr4-93	E3
Merged-chr4-83257478-2	chr4	83257401	83257600	chr4-94	E13
Merged-chr4-125651835-2	chr4	125651201	125652200	chr4-95	E3
Merged-chr4-137771612-2	chr4	137771201	137772200	chr4-96	E3
Merged-chr4-139091646-2	chr4	139090601	139092000	chr4-97	E3
Merged-chr13-100990865-2	chr13	100990801	100991000	chr13-1	E5
Merged-chr13-29596967-2	chr13	29596801	29597200	chr13-2	E15
Merged-chr13-57949689-2	chr13	57949601	57949800	chr13-3	E4
Merged-chr13-40670118-2	chr13	40670001	40670400	chr13-4	E5
Merged-chr13-107679011-2	chr13	107678801	107679200	chr13-5	E14
Merged-chr14-31571911-2	chr14	31571601	31572800	chr14-6	E6
Merged-chr14-121542024-2	chr14	121538601	121543400	chr14-7	E17
Merged-chr14-122255665-2	chr14	122255601	122255800	chr14-8	E2
Merged-chr14-48475776-2	chr14	48475401	48476200	chr14-9	E15
Merged-chr19-22887153-2	chr19	22885201	22889200	chr19-10	E17
Merged-chr19-47019487-2	chr19	47019201	47019800	chr19-11	E2
Merged-chr19-9066531-2	chr19	9066001	9067200	chr19-12	E14
Merged-chr19-7266039-2	chr19	7265401	7266600	chr19-13	E2
Merged-chr19-11912367-2	chr19	11911601	11913200	chr19-15	E2
Merged-chr19-10072134-2	chr19	10072001	10072200	chr19-16	E8
Merged-chr19-47655135-2	chr19	47655001	47655400	chr19-17	E3
Merged-chr19-5696048-2	chr19	5695601	5696400	chr19-18	E2
Merged-chr19-31461260-2	chr19	31461201	31461400	chr19-19	E5
Merged-chr19-58690885-2	chr19	58683001	58697600	chr19-20	E16
Merged-chr19-4046045-2	chr19	4045601	4046200	chr19-21	E13
Merged-chr19-24686672-2	chr19	24686001	24687400	chr19-22	E14
Merged-chr19-30000042-2	chr19	29997601	30003600	chr19-23	E6
Merged-chr19-5846561-2	chr19	5846001	5847000	chr19-24	E13
Merged-chr19-16598981-2	chr19	16598601	16599200	chr19-25	E3
Merged-chr19-45026317-2	chr19	45025801	45026800	chr19-26	E2
Merged-chr19-45560240-2	chr19	45560001	45560400	chr19-27	E2
Merged-chr19-4928258-2	chr19	4928001	4928600	chr19-29	E2
Merged-chr19-46373737-2	chr19	46373201	46374000	chr19-30	E10
Merged-chr19-10362673-2	chr19	10362201	10363600	chr19-33	E4
Merged-chr19-11299724-2	chr19	11299601	11299800	chr19-34	E14
Merged-chr19-21175356-2	chr19	21174401	21176000	chr19-35	E14
Merged-chr19-23075990-2	chr19	23075801	23076200	chr19-36	E13
Merged-chr19-47222793-2	chr19	47222201	47223600	chr19-37	E3
Merged-chr19-47492252-2	chr19	47492001	47492800	chr19-38	E14
Merged-chr19-56419677-2	chr19	56419401	56419800	chr19-39	E3
Merged-chr19-6634472-2	chr19	6633801	6634800	chr19-40	E4
Merged-chr19-10972796-2	chr19	10972201	10973000	chr19-41	E14
Merged-chr19-42795447-2	chr19	42795201	42795600	chr19-42	E2
Merged-chr19-55271650-2	chr19	55271201	55272000	chr19-43	E14
Merged-chr19-5810575-2	chr19	5810001	5810800	chr19-44	E2
Merged-chr19-16252101-2	chr19	16252001	16252200	chr19-45	E7
Merged-chr19-21815781-2	chr19	21814001	21816400	chr19-46	E9
Merged-chr19-46490751-2	chr19	46490601	46491000	chr19-47	E3
Merged-chr19-6979769-2	chr19	6979201	6980800	chr19-48	E2
Merged-chr19-12488193-2	chr19	12487801	12488400	chr19-50	E13
Merged-chr19-45066255-2	chr19	45065801	45067200	chr19-51	E1
Merged-chr19-46618503-2	chr19	46618401	46618600	chr19-52	E9
Merged-chr19-53676743-2	chr19	53676201	53677800	chr19-54	E2
Merged-chr19-3419430-2	chr19	3419201	3419600	chr19-55	E3
Merged-chr19-24242390-2	chr19	24242201	24242600	chr19-59	E2
Merged-chr19-25258640-2	chr19	25254801	25264400	chr19-60	E17
Merged-chr19-37394931-2	chr19	37393001	37400200	chr19-61	E9
Merged-chr19-38060310-2	chr19	38060201	38060600	chr19-62	E12
Merged-chr19-45075706-2	chr19	45075401	45076200	chr19-63	E2
Merged-chr19-53740517-2	chr19	53740401	53740600	chr19-64	E5
Merged-chr19-59585897-2	chr19	59585601	59586000	chr19-66	E13
Merged-chr19-3651695-2	chr19	3651201	3652400	chr19-68	E9
Merged-chr19-4861243-2	chr19	4860601	4862000	chr19-69	E6
Merged-chr19-5525326-2	chr19	5525201	5525400	chr19-70	E4
Merged-chr19-6216335-2	chr19	6215801	6217000	chr19-72	E6
Merged-chr19-10258369-2	chr19	10258201	10258600	chr19-75	E3
Merged-chr19-10707594-2	chr19	10707401	10707800	chr19-76	E3
Merged-chr19-11399859-2	chr19	11398001	11401000	chr19-77	E17
Merged-chr19-18427181-2	chr19	18420801	18434400	chr19-78	E16
Merged-chr19-21778253-2	chr19	21777601	21779000	chr19-79	E2
Merged-chr19-23095935-2	chr19	23094401	23099200	chr19-80	E14
Merged-chr19-24192383-2	chr19	24190201	24193800	chr19-81	E9
Merged-chr19-24318944-2	chr19	24317801	24322000	chr19-82	E17
Merged-chr19-33171112-2	chr19	33170201	33172400	chr19-84	E17
Merged-chr19-37795847-2	chr19	37795601	37796000	chr19-86	E3
Merged-chr19-38876157-2	chr19	38875201	38877400	chr19-88	E10
Merged-chr19-40894739-2	chr19	40894001	40895600	chr19-89	E2
Merged-chr19-41697597-2	chr19	41697401	41697800	chr19-90	E4
Merged-chr19-45293698-2	chr19	45293401	45294000	chr19-91	E2
Merged-chr19-46567457-2	chr19	46567401	46567600	chr19-92	E7
Merged-chr19-47357604-2	chr19	47357001	47358600	chr19-93	E3
Merged-chr19-50678402-2	chr19	50677801	50679000	chr19-94	E2
Merged-chr19-53462938-2	chr19	53462601	53463800	chr19-95	E14
Merged-chr19-57479950-2	chr19	57479801	57480200	chr19-97	E14
Merged-chr15-36507937-2	chr15	36507801	36508000	chr15-10	E5
Merged-chr15-74667820-2	chr15	74667401	74668000	chr15-11	E2
Merged-chr15-96333560-2	chr15	96333001	96334000	chr15-12	E13
Merged-chr15-84657537-2	chr15	84657401	84657600	chr15-13	E3
Merged-chr15-76976572-2	chr15	76975001	76977600	chr15-14	E14
Merged-chr15-101116743-2	chr15	101115601	101117200	chr15-15	E4
Merged-chr15-103215337-2	chr15	103215201	103215400	chr15-16	E2
Merged-chr15-78437065-2	chr15	78436401	78437800	chr15-17	E2
Merged-chr15-38519221-2	chr15	38518201	38519800	chr15-18	E2
Merged-chr15-97342494-2	chr15	97342201	97342600	chr15-19	E3
Merged-chr15-38250547-2	chr15	38248401	38251400	chr15-20	E6
Merged-chr15-100074938-2	chr15	100074801	100075000	chr15-21	E3
Merged-chr15-88189572-2	chr15	88189401	88189800	chr15-22	E5
Merged-chr15-31294703-2	chr15	31294601	31295000	chr15-23	E14
Merged-chr15-38384534-2	chr15	38384201	38385000	chr15-24	E2
Merged-chr15-96604409-2	chr15	96604001	96604600	chr15-25	E8
Merged-chr15-100965325-2	chr15	100965001	100966000	chr15-26	E6
Merged-chr15-74387476-2	chr15	74386601	74388000	chr15-27	E14
Merged-chr15-101398399-2	chr15	101397001	101402400	chr15-29	E17
Merged-chr15-102399704-2	chr15	102399401	102400000	chr15-30	E2
Merged-chr15-36716443-2	chr15	36715801	36716800	chr15-31	E13
Merged-chr15-78928084-2	chr15	78927801	78928200	chr15-32	E2
Merged-chr15-34876494-2	chr15	34873201	34878400	chr15-33	E16
Merged-chr15-91078240-2	chr15	91077801	91078600	chr15-34	E15
Merged-chr15-96702792-2	chr15	96701801	96704000	chr15-35	E13
Merged-chr15-98886127-2	chr15	98883201	98887600	chr15-36	E6
Merged-chr15-52967956-2	chr15	52967601	52968200	chr15-38	E14
Merged-chr15-99890790-2	chr15	99890201	99891000	chr15-40	E13
Merged-chr15-99904390-2	chr15	99903801	99904600	chr15-41	E6
Merged-chr15-25754350-2	chr15	25751801	25757000	chr15-42	E12
Merged-chr15-36796870-2	chr15	36796201	36797200	chr15-43	E8
Merged-chr15-37082019-2	chr15	37081001	37082800	chr15-44	E13
Merged-chr15-80977905-2	chr15	80977601	80978400	chr15-45	E2
Merged-chr15-102212014-2	chr15	102211601	102212200	chr15-46	E13
Merged-chr15-6909950-2	chr15	6909801	6910200	chr15-47	E13
Merged-chr15-58063963-2	chr15	58061201	58067600	chr15-49	E17
Merged-chr15-76119088-2	chr15	76118401	76119400	chr15-50	E2
Merged-chr15-76957029-2	chr15	76956601	76957800	chr15-51	E6
Merged-chr15-98743956-2	chr15	98743801	98744200	chr15-53	E7
Merged-chr15-102005535-2	chr15	102005001	102006000	chr15-54	E3
Merged-chr15-102203608-2	chr15	102203001	102204400	chr15-55	E2
Merged-chr15-78773395-2	chr15	78772801	78773600	chr15-56	E2
Merged-chr15-83673305-2	chr15	83672801	83674000	chr15-57	E6
Merged-chr15-97472182-2	chr15	97471601	97472600	chr15-58	E14
Merged-chr15-67018455-2	chr15	67018001	67018800	chr15-59	E14
Merged-chr15-77355677-2	chr15	77355401	77356400	chr15-60	E13
Merged-chr15-79758744-2	chr15	79757601	79759400	chr15-61	E6
Merged-chr15-95667435-2	chr15	95667001	95667600	chr15-62	E5
Merged-chr15-27998927-2	chr15	27996201	28001600	chr15-63	E1
Merged-chr15-28071258-2	chr15	28069601	28072800	chr15-64	E1
Merged-chr15-38301601-2	chr15	38298801	38302800	chr15-65	E2
Merged-chr15-68907824-2	chr15	68907601	68908200	chr15-66	E15
Merged-chr15-73466748-2	chr15	73466401	73467000	chr15-67	E3
Merged-chr15-75969313-2	chr15	75969001	75969600	chr15-68	E2
Merged-chr15-79481515-2	chr15	79481201	79481800	chr15-69	E2
Merged-chr15-80091586-2	chr15	80090801	80093000	chr15-70	E2
Merged-chr15-84987992-2	chr15	84987001	84988600	chr15-71	E2
Merged-chr15-96135833-2	chr15	96135401	96136000	chr15-73	E14
Merged-chr15-98990348-2	chr15	98985801	98993000	chr15-74	E13
Merged-chr15-101329853-2	chr15	101328801	101332000	chr15-75	E3
Merged-chr15-8419745-2	chr15	8416001	8421000	chr15-76	E11
Merged-chr15-27356994-2	chr15	27355801	27358600	chr15-78	E17
Merged-chr15-81479711-2	chr15	81479401	81480400	chr15-79	E13
Merged-chr15-83535438-2	chr15	83534801	83536000	chr15-80	E3
Merged-chr15-83991909-2	chr15	83991401	83993000	chr15-81	E4
Merged-chr15-94725155-2	chr15	94723801	94727200	chr15-82	E16
Merged-chr15-103155952-2	chr15	103155801	103156200	chr15-83	E2
Merged-chr15-36126910-2	chr15	36126801	36127000	chr15-84	E2
Merged-chr15-36472234-2	chr15	36471801	36472800	chr15-85	E14
Merged-chr15-37431038-2	chr15	37430801	37431200	chr15-86	E4
Merged-chr15-39728553-2	chr15	39728001	39729600	chr15-87	E14
Merged-chr15-62080057-2	chr15	62079801	62080800	chr15-88	E12
Merged-chr15-63998103-2	chr15	63997401	63998600	chr15-89	E2
Merged-chr15-66281755-2	chr15	66279001	66283400	chr15-90	E17
Merged-chr15-77793330-2	chr15	77793001	77793800	chr15-91	E8
Merged-chr15-79126486-2	chr15	79126201	79126800	chr15-92	E3
Merged-chr15-82956891-2	chr15	82956001	82958200	chr15-95	E4
Merged-chr15-84411185-2	chr15	84410601	84411600	chr15-96	E6
Merged-chr15-84450699-2	chr15	84450401	84451000	chr15-97	E2
Merged-chr15-85017231-2	chr15	85017001	85017600	chr15-98	E3
Merged-chr15-85571821-2	chr15	85571201	85572600	chr15-99	E14
Merged-chr11-57912018-2	chr11	57911601	57912200	chr11-10	E3
Merged-chr11-108118928-2	chr11	108115401	108120400	chr11-11	E17
Merged-chr11-99665666-2	chr11	99665601	99665800	chr11-13	E6
Merged-chr11-99851290-2	chr11	99851001	99851400	chr11-14	E5
Merged-chr11-22372932-2	chr11	22372601	22373200	chr11-15	E5
Merged-chr11-99857346-2	chr11	99854401	99858400	chr11-17	E17
Merged-chr11-19851468-2	chr11	19851401	19851600	chr11-19	E14
Merged-chr11-62512057-2	chr11	62511801	62512400	chr11-21	E2
Merged-chr11-119282654-2	chr11	119282201	119283000	chr11-22	E10
Merged-chr11-4147309-2	chr11	4147201	4147400	chr11-24	E3
Merged-chr11-99583315-2	chr11	99582801	99583600	chr11-27	E5
Merged-chr11-118376885-2	chr11	118375801	118378600	chr11-28	E6
Merged-chr11-59640474-2	chr11	59640401	59640600	chr11-29	E4
Merged-chr11-75206493-2	chr11	75206201	75206800	chr11-32	E4
Merged-chr11-99634835-2	chr11	99634601	99635000	chr11-33	E5
Merged-chr11-99643837-2	chr11	99643601	99644000	chr11-36	E4
Merged-chr11-20585672-2	chr11	20584001	20586600	chr11-37	E14
Merged-chr11-99591159-2	chr11	99590801	99591400	chr11-38	E5
Merged-chr11-69459848-2	chr11	69459401	69460000	chr11-48	E6
Merged-chr11-8572803-2	chr11	8570001	8575200	chr11-50	E12
Merged-chr11-80509030-2	chr11	80508601	80509600	chr11-51	E4
Merged-chr11-19836268-2	chr11	19836001	19836600	chr11-64	E3
Merged-chr11-99815262-2	chr11	99815001	99815400	chr11-65	E5
Merged-chr11-52479908-2	chr11	52479601	52480600	chr11-72	E6
Merged-chr11-99837315-2	chr11	99837201	99837600	chr11-73	E5
Merged-chr11-58443280-2	chr11	58440601	58444600	chr11-82	E17
Merged-chr11-61410128-2	chr11	61409201	61410800	chr11-83	E6
Merged-chr11-40051011-2	chr11	40050401	40052200	chr11-87	E15
Merged-chr11-82901809-2	chr11	82900801	82902200	chr11-88	E8
Merged-chr11-99597929-2	chr11	99597601	99598200	chr11-89	E5
Merged-chr15-44716201-2	chr15	44716001	44716600	chr15-1	E15
Merged-chr15-99236245-2	chr15	99236001	99236400	chr15-3	E4
Merged-chr15-78486819-2	chr15	78486601	78487200	chr15-4	E4
Merged-chr15-101494421-2	chr15	101494201	101494600	chr15-5	E4
Merged-chr15-76013462-2	chr15	76012001	76016000	chr15-7	E3
Merged-chr15-8568954-2	chr15	8568401	8569800	chr15-8	E2
Merged-chr16-91692632-2	chr16	91690001	91693800	chr16-1	E10
Merged-chr16-8481927-2	chr16	8481601	8482400	chr16-2	E7
Merged-chr16-4549412-2	chr16	4549201	4549600	chr16-4	E8
Merged-chr16-13429024-2	chr16	13428801	13429200	chr16-5	E4
Merged-chr16-26649757-2	chr16	26649601	26650000	chr16-6	E5
Merged-chr16-20522625-2	chr16	20522401	20523000	chr16-8	E10
Merged-chr16-9030410-2	chr16	9030001	9031200	chr16-9	E5
Merged-chr17-28388624-2	chr17	28387801	28389200	chr17-1	E6
Merged-chr17-8205377-2	chr17	8205201	8205600	chr17-9	E5
Merged-chr10-7132850-2	chr10	7131401	7133600	chr10-100	E10
Merged-chr10-12159973-2	chr10	12157201	12162200	chr10-101	E16
Merged-chr10-21102049-2	chr10	21101001	21102800	chr10-102	E13
Merged-chr10-21827618-2	chr10	21826601	21830000	chr10-103	E13
Merged-chr10-46690039-2	chr10	46689801	46690400	chr10-105	E14
Merged-chr10-60351894-2	chr10	60351201	60352600	chr10-107	E3
Merged-chr10-74920932-2	chr10	74920801	74921000	chr10-108	E3
Merged-chr10-75002805-2	chr10	75002601	75003200	chr10-109	E15
Merged-chr10-79768511-2	chr10	79768201	79768800	chr10-110	E14
Merged-chr10-84797521-2	chr10	84795001	84799600	chr10-111	E17
Merged-chr10-99132701-2	chr10	99132001	99134000	chr10-112	E5
Merged-chr10-113185022-2	chr10	113184801	113185400	chr10-114	E15
Merged-chr10-127276586-2	chr10	127276401	127277000	chr10-115	E8
Merged-chr10-3941909-2	chr10	3941601	3942800	chr10-116	E13
Merged-chr10-7150055-2	chr10	7150001	7150200	chr10-117	E7
Merged-chr10-11801974-2	chr10	11801601	11802200	chr10-118	E15
Merged-chr10-20952314-2	chr10	20952001	20953000	chr10-119	E2
Merged-chr10-21687170-2	chr10	21685801	21689800	chr10-120	E6
Merged-chr10-42356657-2	chr10	42356401	42356800	chr10-123	E6
Merged-chr10-60189407-2	chr10	60188001	60190800	chr10-127	E6
Merged-chr10-81287886-2	chr10	81287801	81288000	chr10-131	E14
Merged-chr10-82594609-2	chr10	82594401	82594800	chr10-132	E15
Merged-chr10-85421285-2	chr10	85420601	85421600	chr10-133	E7
Merged-chr10-87488475-2	chr10	87486401	87492400	chr10-134	E1
Merged-chr10-88708654-2	chr10	88707801	88709000	chr10-135	E14
Merged-chr10-108353067-2	chr10	108352801	108353200	chr10-137	E12
Merged-chr10-111362127-2	chr10	111362001	111362400	chr10-138	E3
Merged-chr10-113224278-2	chr10	113217601	113229400	chr10-139	E16
Merged-chr10-115178287-2	chr10	115178001	115178600	chr10-140	E15
Merged-chr10-116354529-2	chr10	116354401	116354600	chr10-141	E4
Merged-chr10-7619943-2	chr10	7619801	7620200	chr10-145	E3
Merged-chr10-12773856-2	chr10	12773401	12774200	chr10-146	E16
Merged-chr10-13872524-2	chr10	13870001	13874400	chr10-147	E17
Merged-chr10-18506887-2	chr10	18506401	18507400	chr10-148	E14
Merged-chr10-21947877-2	chr10	21947401	21949000	chr10-149	E6
Merged-chr10-39659544-2	chr10	39659001	39660000	chr10-152	E13
Merged-chr10-44607098-2	chr10	44605401	44608400	chr10-153	E17
Merged-chr10-59158410-2	chr10	59152801	59161200	chr10-159	E17
Merged-chr10-60791200-2	chr10	60791001	60791400	chr10-161	E3
Merged-chr10-61472436-2	chr10	61468201	61475000	chr10-162	E6
Merged-chr10-62578097-2	chr10	62577801	62578600	chr10-164	E2
Merged-chr10-69814330-2	chr10	69805001	69818000	chr10-166	E17
Merged-chr10-69840770-2	chr10	69839001	69844200	chr10-167	E6
Merged-chr10-71480117-2	chr10	71480001	71480400	chr10-168	E15
Merged-chr10-74105690-2	chr10	74098601	74112600	chr10-169	E16
Merged-chr10-76389622-2	chr10	76389201	76390000	chr10-170	E9
Merged-chr10-76599805-2	chr10	76599601	76600400	chr10-171	E5
Merged-chr10-77082761-2	chr10	77082601	77083200	chr10-172	E14
Merged-chr10-77742156-2	chr10	77741001	77742800	chr10-173	E4
Merged-chr10-77788070-2	chr10	77788001	77788200	chr10-174	E5
Merged-chr10-79200136-2	chr10	79199601	79200600	chr10-175	E15
Merged-chr10-80577562-2	chr10	80576201	80578800	chr10-178	E2
Merged-chr10-80606593-2	chr10	80606001	80607600	chr10-179	E2
Merged-chr10-82097425-2	chr10	82096201	82100600	chr10-182	E16
Merged-chr10-93279025-2	chr10	93278001	93279600	chr10-183	E13
Merged-chr10-100739164-2	chr10	100735601	100740400	chr10-188	E16
Merged-chr10-112199297-2	chr10	112199201	112199400	chr10-190	E15
Merged-chr10-116518091-2	chr10	116514401	116525200	chr10-191	E10
Merged-chr10-116574893-2	chr10	116564601	116580400	chr10-192	E11
Merged-chr10-116924231-2	chr10	116923801	116924400	chr10-193	E3
Merged-chr10-117354961-2	chr10	117343601	117361000	chr10-194	E9
Merged-chr10-118049502-2	chr10	118049401	118049800	chr10-195	E4
Merged-chr10-119036080-2	chr10	119036001	119036200	chr10-196	E5
Merged-chr10-120171770-2	chr10	120171201	120172600	chr10-197	E13
Merged-chr10-121742144-2	chr10	121740801	121742600	chr10-198	E11
Merged-chr10-122884406-2	chr10	122884001	122884600	chr10-199	E3
Merged-chr12-40399844-2	chr12	40396801	40402200	chr12-100	E18
Merged-chr12-42120923-2	chr12	42093001	42134400	chr12-101	E16
Merged-chr12-43620054-2	chr12	43583801	43667600	chr12-102	E16
Merged-chr12-44981139-2	chr12	44980401	44981600	chr12-103	E16
Merged-chr12-69476904-2	chr12	69476601	69477200	chr12-105	E2
Merged-chr12-83523864-2	chr12	83523201	83524600	chr12-108	E12
Merged-chr12-86794002-2	chr12	86793601	86794600	chr12-109	E3
Merged-chr12-88904583-2	chr12	88901601	88906400	chr12-110	E17
Merged-chr12-91684173-2	chr12	91683201	91684600	chr12-111	E12
Merged-chr12-103325486-2	chr12	103324801	103326000	chr12-112	E2
Merged-chr12-108848395-2	chr12	108847201	108849800	chr12-114	E6
Merged-chr12-110481341-2	chr12	110481201	110481400	chr12-115	E12
Merged-chr12-111067905-2	chr12	111067801	111068200	chr12-117	E7
Merged-chr12-112837906-2	chr12	112837801	112838000	chr12-119	E7
Merged-chr18-24132965-2	chr18	24132601	24133200	chr18-1	E6
Merged-chr18-81669244-2	chr18	81668801	81669600	chr18-2	E5
Merged-chr18-82477967-2	chr18	82476201	82480800	chr18-5	E1
Merged-chr18-76657903-2	chr18	76657801	76658000	chr18-6	E4
Merged-chr18-75306550-2	chr18	75306401	75306600	chr18-7	E13
Merged-chr18-81401513-2	chr18	81401401	81401600	chr18-8	E14
Merged-chr18-83256147-2	chr18	83255801	83256600	chr18-9	E5
Merged-chr1-36580423-2	chr1	36580001	36581200	chr1-1	E2
Merged-chr1-189991294-2	chr1	189991201	189991400	chr1-2	E5
Merged-chr1-74424132-2	chr1	74423801	74424400	chr1-3	E4
Merged-chr1-190448375-2	chr1	190448001	190448600	chr1-4	E3
Merged-chr1-55524129-2	chr1	55524001	55524200	chr1-5	E5
Merged-chr1-175512356-2	chr1	175512001	175512600	chr1-7	E15
Merged-chr1-170655710-2	chr1	170655401	170656000	chr1-8	E4
Merged-chr14-56098132-2	chr14	56096201	56099000	chr14-101	E16
Merged-chr14-56491239-2	chr14	56489201	56494400	chr14-102	E9
Merged-chr14-57908667-2	chr14	57908401	57909000	chr14-103	E13
Merged-chr14-61058398-2	chr14	61058001	61058600	chr14-104	E6
Merged-chr14-70753166-2	chr14	70750401	70754800	chr14-105	E11
Merged-chr14-71079813-2	chr14	71073801	71082400	chr14-106	E17
Merged-chr14-75835151-2	chr14	75834801	75835400	chr14-107	E2
Merged-chr14-89396693-2	chr14	89386801	89405400	chr14-109	E16
Merged-chr14-92306627-2	chr14	92291201	92315000	chr14-110	E16
Merged-chr14-117337279-2	chr14	117336601	117337600	chr14-113	E15
Merged-chr14-121714440-2	chr14	121714201	121714600	chr14-115	E14
Merged-chr7-64234695-2	chr7	64231201	64236600	chr7-10	E17
Merged-chr7-77234761-2	chr7	77234601	77235000	chr7-11	E15
Merged-chr7-25530967-2	chr7	25530801	25531200	chr7-12	E15
Merged-chr7-37467045-2	chr7	37466401	37467600	chr7-13	E3
Merged-chr7-49070842-2	chr7	49068801	49071800	chr7-14	E14
Merged-chr7-141042749-2	chr7	141042601	141042800	chr7-15	E14
Merged-chr7-16944830-2	chr7	16944401	16945800	chr7-16	E2
Merged-chr7-109439816-2	chr7	109439401	109440800	chr7-17	E1
Merged-chr7-100009839-2	chr7	100009201	100010400	chr7-18	E1
Merged-chr7-19364077-2	chr7	19364001	19364200	chr7-19	E3
Merged-chr7-127104674-2	chr7	127104601	127104800	chr7-20	E14
Merged-chr7-142229403-2	chr7	142228601	142230000	chr7-21	E6
Merged-chr7-141327407-2	chr7	141326801	141328600	chr7-22	E2
Merged-chr7-142499268-2	chr7	142499201	142499400	chr7-23	E14
Merged-chr7-25303742-2	chr7	25303001	25304400	chr7-24	E3
Merged-chr7-80746341-2	chr7	80745401	80746800	chr7-25	E13
Merged-chr7-117278701-2	chr7	117278401	117279400	chr7-26	E5
Merged-chr7-35366329-2	chr7	35366201	35366400	chr7-28	E7
Merged-chr7-19951983-2	chr7	19951801	19952200	chr7-29	E4
Merged-chr7-81478436-2	chr7	81478201	81478600	chr7-30	E6
Merged-chr7-30608580-2	chr7	30608201	30608800	chr7-31	E2
Merged-chr7-145034348-2	chr7	145033601	145034800	chr7-32	E14
Merged-chr7-45216758-2	chr7	45215801	45217400	chr7-33	E2
Merged-chr7-80833212-2	chr7	80833001	80833400	chr7-34	E13
Merged-chr7-139852312-2	chr7	139852001	139852600	chr7-35	E6
Merged-chr7-19084419-2	chr7	19083801	19084800	chr7-36	E3
Merged-chr7-45916932-2	chr7	45916801	45917000	chr7-37	E13
Merged-chr7-51300439-2	chr7	51300201	51300800	chr7-38	E15
Merged-chr7-105550547-2	chr7	105550201	105550800	chr7-39	E15
Merged-chr7-58225964-2	chr7	58224401	58227600	chr7-41	E14
Merged-chr7-19800474-2	chr7	19800401	19800600	chr7-42	E6
Merged-chr7-35382940-2	chr7	35382401	35383200	chr7-43	E14
Merged-chr7-80320354-2	chr7	80320001	80320800	chr7-44	E2
Merged-chr7-113016081-2	chr7	113016001	113016200	chr7-45	E3
Merged-chr7-143401675-2	chr7	143401601	143401800	chr7-47	E4
Merged-chr7-19817575-2	chr7	19817201	19817800	chr7-48	E2
Merged-chr7-63956951-2	chr7	63956401	63957200	chr7-49	E2
Merged-chr7-85104858-2	chr7	85102201	85107800	chr7-50	E18
Merged-chr7-27258243-2	chr7	27257001	27260000	chr7-51	E2
Merged-chr7-30289763-2	chr7	30289401	30290000	chr7-52	E3
Merged-chr7-97831002-2	chr7	97830801	97831200	chr7-53	E7
Merged-chr7-124804891-2	chr7	124804601	124805200	chr7-54	E15
Merged-chr7-126069921-2	chr7	126069801	126070000	chr7-55	E4
Merged-chr7-127935806-2	chr7	127935201	127936800	chr7-56	E2
Merged-chr7-27622119-2	chr7	27621001	27622600	chr7-57	E8
Merged-chr7-44485350-2	chr7	44485201	44485800	chr7-61	E14
Merged-chr7-46250176-2	chr7	46249801	46251000	chr7-62	E4
Merged-chr7-92806893-2	chr7	92806601	92807000	chr7-63	E3
Merged-chr7-107237057-2	chr7	107237001	107237200	chr7-64	E14
Merged-chr7-139851580-2	chr7	139851001	139851800	chr7-65	E6
Merged-chr7-140841453-2	chr7	140841401	140841600	chr7-66	E3
Merged-chr7-19270686-2	chr7	19270401	19271000	chr7-67	E2
Merged-chr7-45162314-2	chr7	45162001	45162600	chr7-68	E2
Merged-chr7-49400856-2	chr7	49400401	49401400	chr7-69	E2
Merged-chr7-130252528-2	chr7	130252201	130253200	chr7-70	E3
Merged-chr7-134550592-2	chr7	134550401	134550800	chr7-71	E5
Merged-chr7-141465279-2	chr7	141464401	141465600	chr7-72	E2
Merged-chr7-4526403-2	chr7	4526001	4526800	chr7-74	E13
Merged-chr7-29281910-2	chr7	29281201	29282400	chr7-75	E2
Merged-chr7-29838068-2	chr7	29836601	29841600	chr7-76	E10
Merged-chr7-48968415-2	chr7	48968201	48968600	chr7-79	E5
Merged-chr7-66350655-2	chr7	66350601	66350800	chr7-80	E4
Merged-chr7-80963737-2	chr7	80963401	80964000	chr7-81	E14
Merged-chr7-101003680-2	chr7	101003401	101004000	chr7-82	E3
Merged-chr7-113711236-2	chr7	113711001	113711800	chr7-83	E5
Merged-chr7-97341153-2	chr7	97340801	97341400	chr7-89	E13
Merged-chr7-118652831-2	chr7	118652601	118653200	chr7-90	E13
Merged-chr7-142281055-2	chr7	142280401	142282200	chr7-91	E6
Merged-chr7-143108402-2	chr7	143107801	143109200	chr7-92	E1
Merged-chr7-3206103-2	chr7	3203201	3207800	chr7-93	E13
Merged-chr7-30973641-2	chr7	30972601	30974400	chr7-94	E2
Merged-chr7-37439688-2	chr7	37439401	37440000	chr7-95	E3
Merged-chr7-44225305-2	chr7	44225201	44225600	chr7-96	E3
Merged-chr7-45617266-2	chr7	45617001	45617800	chr7-97	E2
Merged-chr7-73200175-2	chr7	73200001	73200400	chr7-98	E5
Merged-chr7-101301982-2	chr7	101301201	101302400	chr7-99	E2
Merged-chr16-11380292-2	chr16	11380201	11380400	chr16-105	E7
Merged-chr16-13981989-2	chr16	13981601	13982600	chr16-106	E14
Merged-chr16-14705600-2	chr16	14705201	14706400	chr16-107	E2
Merged-chr16-15864289-2	chr16	15864201	15864400	chr16-108	E14
Merged-chr16-15927930-2	chr16	15925601	15930800	chr16-109	E10
Merged-chr16-17977709-2	chr16	17977601	17977800	chr16-110	E3
Merged-chr16-21418273-2	chr16	21418201	21418400	chr16-113	E5
Merged-chr16-21701973-2	chr16	21701401	21702400	chr16-115	E14
Merged-chr16-22341038-2	chr16	22339201	22342000	chr16-116	E6
Merged-chr16-23663964-2	chr16	23660801	23669800	chr16-118	E17
Merged-chr16-27088176-2	chr16	27087801	27088400	chr16-120	E18
Merged-chr16-28840768-2	chr16	28840601	28841000	chr16-121	E3
Merged-chr16-30216093-2	chr16	30216001	30216200	chr16-122	E4
Merged-chr16-33517523-2	chr16	33517201	33518000	chr16-123	E2
Merged-chr16-33880723-2	chr16	33880601	33880800	chr16-124	E7
Merged-chr16-35738266-2	chr16	35738001	35738800	chr16-125	E3
Merged-chr16-36988024-2	chr16	36987401	36989600	chr16-126	E6
Merged-chr16-38139835-2	chr16	38139201	38141600	chr16-127	E10
Merged-chr16-42269581-2	chr16	42269001	42270400	chr16-128	E14
Merged-chr16-42600963-2	chr16	42595001	42608400	chr16-129	E16
Merged-chr16-44532359-2	chr16	44532001	44533000	chr16-130	E6
Merged-chr16-45338783-2	chr16	45335201	45346600	chr16-131	E16
Merged-chr16-46088629-2	chr16	46087801	46089600	chr16-132	E17
Merged-chr16-60000455-2	chr16	59998401	60006600	chr16-133	E16
Merged-chr16-77050527-2	chr16	77050201	77050800	chr16-134	E15
Merged-chr16-80073674-2	chr16	80073401	80074000	chr16-135	E15
Merged-chr16-89974040-2	chr16	89973001	89975200	chr16-136	E7
Merged-chr16-90256215-2	chr16	90252401	90257800	chr16-137	E9
Merged-chr16-90934660-2	chr16	90934201	90935400	chr16-138	E2
Merged-chr16-92961965-2	chr16	92961601	92963000	chr16-139	E17
Merged-chr16-93712073-2	chr16	93711601	93712800	chr16-140	E2
Merged-chr10-128188327-2	chr10	128187201	128188800	chr10-203	E14
Merged-chr3-54676842-2	chr3	54670401	54679000	chr3-10	E17
Merged-chr3-139010505-2	chr3	139006401	139022800	chr3-11	E10
Merged-chr3-75165052-2	chr3	75165001	75165200	chr3-12	E13
Merged-chr3-129918603-2	chr3	129918401	129918800	chr3-13	E5
Merged-chr3-136699939-2	chr3	136699801	136700000	chr3-14	E5
Merged-chr3-86992848-2	chr3	86990401	86994400	chr3-15	E17
Merged-chr3-153128013-2	chr3	153127801	153128200	chr3-17	E5
Merged-chr3-22156423-2	chr3	22155601	22157000	chr3-18	E13
Merged-chr3-100925289-2	chr3	100925001	100925400	chr3-19	E3
Merged-chr3-127267942-2	chr3	127267801	127268000	chr3-20	E15
Merged-chr3-86920012-2	chr3	86919601	86921000	chr3-21	E2
Merged-chr3-108856909-2	chr3	108856001	108857600	chr3-22	E1
Merged-chr3-33991196-2	chr3	33991001	33991600	chr3-23	E13
Merged-chr3-86224109-2	chr3	86223601	86225400	chr3-25	E2
Merged-chr3-22298254-2	chr3	22298001	22299000	chr3-26	E14
Merged-chr3-32235697-2	chr3	32227001	32238600	chr3-27	E17
Merged-chr3-96675692-2	chr3	96675401	96675800	chr3-28	E13
Merged-chr3-53593941-2	chr3	53593801	53594200	chr3-30	E15
Merged-chr3-96015875-2	chr3	96015801	96016000	chr3-31	E5
Merged-chr3-66687359-2	chr3	66687201	66687600	chr3-32	E15
Merged-chr3-90224624-2	chr3	90224401	90225000	chr3-33	E3
Merged-chr3-101163499-2	chr3	101162401	101164400	chr3-34	E13
Merged-chr3-144643785-2	chr3	144643601	144644000	chr3-35	E5
Merged-chr3-9105752-2	chr3	9105601	9106000	chr3-36	E3
Merged-chr3-11212443-2	chr3	11212001	11212800	chr3-37	E14
Merged-chr3-94386498-2	chr3	94384801	94387400	chr3-38	E6
Merged-chr3-105894133-2	chr3	105894001	105894400	chr3-39	E3
Merged-chr3-137867234-2	chr3	137866801	137867400	chr3-40	E12
Merged-chr3-35474523-2	chr3	35474401	35474600	chr3-41	E3
Merged-chr3-52829996-2	chr3	52823801	52833600	chr3-42	E17
Merged-chr3-117010392-2	chr3	117010201	117010600	chr3-43	E15
Merged-chr3-35723412-2	chr3	35721601	35724600	chr3-44	E13
Merged-chr3-144720435-2	chr3	144720201	144721000	chr3-45	E13
Merged-chr3-9082203-2	chr3	9081601	9082800	chr3-46	E13
Merged-chr3-9500917-2	chr3	9500801	9501000	chr3-47	E3
Merged-chr3-41583686-2	chr3	41583201	41584000	chr3-48	E12
Merged-chr3-76121358-2	chr3	76093801	76148000	chr3-50	E16
Merged-chr3-84665913-2	chr3	84665601	84666600	chr3-51	E2
Merged-chr3-90623727-2	chr3	90623401	90624400	chr3-52	E5
Merged-chr3-103461122-2	chr3	103460201	103462000	chr3-53	E6
Merged-chr3-12328591-2	chr3	12328401	12328800	chr3-54	E15
Merged-chr3-35027992-2	chr3	35027401	35028200	chr3-55	E14
Merged-chr3-51399001-2	chr3	51398801	51399400	chr3-56	E13
Merged-chr3-67504740-2	chr3	67504001	67505200	chr3-57	E15
Merged-chr3-88596757-2	chr3	88596601	88597000	chr3-58	E4
Merged-chr3-88651927-2	chr3	88651801	88652000	chr3-59	E14
Merged-chr3-98024491-2	chr3	98024401	98024600	chr3-60	E2
Merged-chr3-101818666-2	chr3	101818401	101818800	chr3-61	E4
Merged-chr3-107680673-2	chr3	107675601	107684200	chr3-62	E10
Merged-chr3-127257847-2	chr3	127257001	127258800	chr3-63	E13
Merged-chr3-152944919-2	chr3	152944601	152945200	chr3-64	E5
Merged-chr3-3667669-2	chr3	3667001	3668000	chr3-65	E14
Merged-chr3-31974618-2	chr3	31968601	31979600	chr3-66	E17
Merged-chr3-51247938-2	chr3	51247601	51248400	chr3-67	E8
Merged-chr3-84040073-2	chr3	84039001	84040800	chr3-68	E2
Merged-chr3-84333648-2	chr3	84333401	84333800	chr3-69	E3
Merged-chr3-90539473-2	chr3	90539401	90539600	chr3-70	E3
Merged-chr18-35546535-2	chr18	35544801	35550200	chr18-100	E16
Merged-chr3-139006009-2	chr3	139005801	139006400	chr3-71	E15
Merged-chr18-35928989-2	chr18	35927201	35930200	chr18-101	E1
Merged-chr3-7805232-2	chr3	7804801	7805600	chr3-73	E15
Merged-chr3-28038185-2	chr3	28037801	28038400	chr3-74	E14
Merged-chr3-47175327-2	chr3	47167401	47178800	chr3-76	E16
Merged-chr3-58590248-2	chr3	58585401	58592000	chr3-77	E9
Merged-chr3-86936507-2	chr3	86936201	86937000	chr3-78	E14
Merged-chr18-63956956-2	chr18	63954801	63957800	chr18-108	E17
Merged-chr3-95015982-2	chr3	95014201	95016600	chr3-79	E2
Merged-chr3-96663635-2	chr3	96663001	96664200	chr3-80	E13
Merged-chr3-98734471-2	chr3	98733601	98735200	chr3-81	E14
Merged-chr18-74443859-2	chr18	74443601	74444200	chr18-111	E2
Merged-chr3-101377163-2	chr3	101376801	101378000	chr3-82	E2
Merged-chr18-76712240-2	chr18	76709401	76713400	chr18-112	E17
Merged-chr3-131034996-2	chr3	131034801	131035200	chr3-84	E5
Merged-chr18-77555411-2	chr18	77554601	77555800	chr18-114	E8
Merged-chr3-137623976-2	chr3	137623401	137624400	chr3-85	E2
Merged-chr3-146404595-2	chr3	146404201	146405200	chr3-86	E2
Merged-chr18-82684505-2	chr18	82681601	82685600	chr18-116	E10
Merged-chr3-9036936-2	chr3	9036801	9037200	chr3-87	E14
Merged-chr3-19246173-2	chr3	19242601	19250600	chr3-88	E10
Merged-chr3-27162205-2	chr3	27162001	27162600	chr3-89	E14
Merged-chr3-27205177-2	chr3	27204601	27205800	chr3-90	E7
Merged-chr3-33053848-2	chr3	33048601	33060200	chr3-91	E17
Merged-chr3-33580691-2	chr3	33580001	33581200	chr3-92	E15
Merged-chr3-38564674-2	chr3	38564401	38564800	chr3-93	E15
Merged-chr3-59540752-2	chr3	59540201	59541400	chr3-94	E14
Merged-chr3-66973742-2	chr3	66973201	66974000	chr3-95	E2
Merged-chr3-67449884-2	chr3	67449801	67450000	chr3-96	E2
Merged-chr3-68565231-2	chr3	68565001	68565400	chr3-97	E14
Merged-chr3-84034067-2	chr3	84033801	84034400	chr3-99	E7
Merged-chr19-3451787-2	chr19	3451401	3452000	chr19-2	E7
Merged-chr19-47328142-2	chr19	47327801	47328600	chr19-3	E2
Merged-chr19-31252008-2	chr19	31238801	31257200	chr19-5	E17
Merged-chr19-45024932-2	chr19	45024801	45025200	chr19-7	E2
Merged-chr19-36398606-2	chr19	36398401	36398800	chr19-8	E5
Merged-chr19-5224705-2	chr19	5224201	5225000	chr19-9	E14
Merged-chr2-163449489-2	chr2	163449401	163449600	chr2-2	E4
Merged-chr2-164671116-2	chr2	164671001	164671200	chr2-6	E5
Merged-chr2-78189806-2	chr2	78189601	78190000	chr2-7	E15
Merged-chr2-31870841-2	chr2	31870601	31871000	chr2-8	E4
Merged-chr2-167582719-2	chr2	167582001	167584000	chr2-9	E3
Merged-chr1-189883118-2	chr1	189882801	189883400	chr1-101	E3
Merged-chr1-39430294-2	chr1	39430001	39430600	chr1-102	E14
Merged-chr1-46850414-2	chr1	46849601	46852200	chr1-103	E11
Merged-chr1-47076679-2	chr1	47076401	47077000	chr1-104	E15
Merged-chr1-60432658-2	chr1	60432201	60433000	chr1-106	E7
Merged-chr1-64655682-2	chr1	64655601	64655800	chr1-107	E15
Merged-chr1-74899136-2	chr1	74898401	74900400	chr1-108	E1
Merged-chr1-86199267-2	chr1	86199201	86199400	chr1-110	E8
Merged-chr1-86532205-2	chr1	86531801	86532800	chr1-111	E13
Merged-chr1-89870592-2	chr1	89869201	89871800	chr1-112	E13
Merged-chr1-92314007-2	chr1	92313801	92314200	chr1-113	E5
Merged-chr1-152573067-2	chr1	152573001	152573200	chr1-114	E2
Merged-chr1-176998076-2	chr1	176997801	176998400	chr1-115	E2
Merged-chr1-180933924-2	chr1	180933801	180934200	chr1-116	E13
Merged-chr1-9998019-2	chr1	9997601	9998800	chr1-117	E4
Merged-chr1-12644804-2	chr1	12644601	12645000	chr1-118	E14
Merged-chr1-74295905-2	chr1	74295201	74296800	chr1-120	E3
Merged-chr1-74803248-2	chr1	74802801	74803800	chr1-121	E2
Merged-chr1-75477600-2	chr1	75477401	75477800	chr1-122	E2
Merged-chr1-101756685-2	chr1	101756601	101756800	chr1-126	E14
Merged-chr1-119050131-2	chr1	119050001	119050400	chr1-127	E2
Merged-chr1-130984692-2	chr1	130984401	130985000	chr1-128	E5
Merged-chr1-131078930-2	chr1	131078801	131079200	chr1-129	E7
Merged-chr1-132736505-2	chr1	132736401	132736600	chr1-130	E3
Merged-chr1-138154282-2	chr1	138153801	138154800	chr1-131	E15
Merged-chr1-138963524-2	chr1	138963201	138964200	chr1-132	E2
Merged-chr1-180279902-2	chr1	180279801	180280000	chr1-133	E3
Merged-chr1-182489913-2	chr1	182489801	182490000	chr1-134	E3
Merged-chr1-189064761-2	chr1	189063601	189065400	chr1-135	E17
Merged-chr1-189762036-2	chr1	189761601	189762600	chr1-136	E14
Merged-chr1-16824821-2	chr1	16824401	16825000	chr1-137	E14
Merged-chr1-52953131-2	chr1	52952601	52953400	chr1-138	E2
Merged-chr1-64949548-2	chr1	64949401	64949600	chr1-139	E3
Merged-chr1-66700629-2	chr1	66700201	66700800	chr1-140	E13
Merged-chr1-74855371-2	chr1	74854801	74856800	chr1-141	E2
Merged-chr1-84840837-2	chr1	84840401	84841800	chr1-142	E12
Merged-chr1-106278718-2	chr1	106278401	106279000	chr1-148	E14
[truncated: 1,160 more rows]

## Sheet: ASCL2
MergedPeakID	chr	start	end	ASCL2_Peak_ID	ChromHMM_state
Merged-chr5-125111246-2	chr5	125110801	125111600	Merged-chr5-125111291-2	E8
Merged-chr12-3806574-2	chr12	3806201	3807400	Merged-chr12-3806347-1	E2
Merged-chr5-65533052-2	chr5	65533001	65533200	Merged-chr5-65533004-2	E7
Merged-chr11-120098849-2	chr11	120098401	120099800	Merged-chr11-120098597-2	E2
Merged-chr19-11912386-2	chr19	11911601	11913200	Merged-chr19-11912372-2	E2
Merged-chr4-145409035-2	chr4	145408801	145409200	Merged-chr4-145409069-1	E12
Merged-chr13-54794398-2	chr13	54794001	54794800	Merged-chr13-54794396-1	E3
Merged-chr5-27009384-2	chr5	27009201	27009600	Merged-chr5-27009367-2	E15
Merged-chr2-30779912-2	chr2	30779401	30780400	Merged-chr2-30779923-2	E3
Merged-chr6-120493142-2	chr6	120492001	120494400	Merged-chr6-120493084-1	E2
Merged-chr11-5242212-2	chr11	5241801	5242400	Merged-chr11-5242323-2	E8
Merged-chr15-76976558-2	chr15	76975001	76977600	Merged-chr15-76976815-2	E14
Merged-chr9-71771420-2	chr9	71770601	71772000	Merged-chr9-71771539-2	E2
Merged-chr11-63919344-2	chr11	63918801	63919600	Merged-chr11-63919487-1	E2
Merged-chr2-152739569-2	chr2	152739401	152739800	Merged-chr2-152739538-2	E2
Merged-chr4-63330313-2	chr4	63329801	63330600	Merged-chr4-63330426-1	E4
Merged-chr10-7582512-2	chr10	7582401	7582800	Merged-chr10-7582424-2	E2
Merged-chr13-46418533-2	chr13	46418001	46419400	Merged-chr13-46418365-1	E2
Merged-chr1-43136556-2	chr1	43135801	43137000	Merged-chr1-43136712-2	E5
Merged-chr1-74111457-2	chr1	74111001	74111800	Merged-chr1-74111513-2	E2
Merged-chr12-99066863-2	chr12	99064601	99068000	Merged-chr12-99067426-2	E17
Merged-chr17-46857362-2	chr17	46857201	46857800	Merged-chr17-46857223-2	E2
Merged-chr7-25334057-2	chr7	25333601	25335000	Merged-chr7-25333814-1	E8
Merged-chr6-143162346-2	chr6	143162201	143162400	Merged-chr6-143162392-1	E2
Merged-chr17-75463521-2	chr17	75463201	75463800	Merged-chr17-75463542-2	E15
Merged-chr16-93941047-2	chr16	93940801	93941200	Merged-chr16-93941094-2	E3
Merged-chr9-65094449-2	chr9	65094201	65094600	Merged-chr9-65094497-1	E3
Merged-chr1-182953727-2	chr1	182953401	182954400	Merged-chr1-182953553-2	E14
Merged-chr3-84186171-2	chr3	84185001	84189000	Merged-chr3-84185341-1	E11
Merged-chr10-121364998-2	chr10	121364401	121365800	Merged-chr10-121364896-1	E2
Merged-chr9-107570491-2	chr9	107570001	107571000	Merged-chr9-107570482-1	E2
Merged-chr15-96642523-2	chr15	96641001	96643400	Merged-chr15-96642845-2	E2
Merged-chr11-69633228-2	chr11	69632801	69633600	Merged-chr11-69633255-2	E2
Merged-chr7-49932375-2	chr7	49932201	49932600	Merged-chr7-49932350-2	E3
Merged-chr6-92251854-2	chr6	92251801	92252000	Merged-chr6-92251808-2	E14
Merged-chr18-76379100-2	chr18	76379001	76379400	Merged-chr18-76379000-1	E2
Merged-chr13-64226943-2	chr13	64226801	64227000	Merged-chr13-64226985-2	E7
Merged-chr13-57909742-2	chr13	57909601	57909800	Merged-chr13-57909784-2	E2
Merged-chr2-152726979-2	chr2	152726801	152727200	Merged-chr2-152726958-2	E3
Merged-chr15-98852817-2	chr15	98851401	98856400	Merged-chr15-98851733-2	E8
Merged-chr10-85327625-2	chr10	85324801	85329400	Merged-chr10-85328150-2	E17
Merged-chr4-63436761-2	chr4	63436401	63437000	Merged-chr4-63436822-2	E4
Merged-chr13-44869997-2	chr13	44869801	44870200	Merged-chr13-44869994-1	E8
Merged-chr13-64152808-2	chr13	64152201	64154200	Merged-chr13-64152416-2	E2
Merged-chr4-133093660-2	chr4	133093401	133094000	Merged-chr4-133093619-1	E2
Merged-chr3-96676307-2	chr3	96675801	96677800	Merged-chr3-96675813-2	E14
Merged-chr19-57198413-2	chr19	57198001	57199000	Merged-chr19-57198326-2	E3
Merged-chr6-124414937-2	chr6	124414201	124416000	Merged-chr6-124414774-1	E2
Merged-chr11-87462664-2	chr11	87462001	87463600	Merged-chr11-87462527-1	E14
Merged-chr2-180761897-2	chr2	180761801	180762000	Merged-chr2-180761893-2	E4
Merged-chr17-87272538-2	chr17	87268001	87276600	Merged-chr17-87272776-2	E17
Merged-chr10-79921189-2	chr10	79920401	79922000	Merged-chr10-79921177-1	E2
Merged-chr10-90019376-2	chr10	90019001	90019600	Merged-chr10-90019452-1	E15
Merged-chr1-190161361-2	chr1	190160801	190161600	Merged-chr1-190161521-2	E3
Merged-chr8-111393663-2	chr8	111393201	111394200	Merged-chr8-111393625-2	E2
Merged-chr11-102040381-2	chr11	102040201	102040600	Merged-chr11-102040361-1	E15
Merged-chr18-25423862-2	chr18	25423201	25424600	Merged-chr18-25423824-2	E14
Merged-chr13-35740878-2	chr13	35740601	35741200	Merged-chr13-35740856-1	E2
Merged-chr7-101003636-2	chr7	101003401	101004000	Merged-chr7-101003572-2	E3
Merged-chr14-25513023-2	chr14	25512801	25513200	Merged-chr14-25513045-1	E3
Merged-chr8-88267209-2	chr8	88267001	88267400	Merged-chr8-88267218-2	E3
Merged-chr11-65713200-2	chr11	65712801	65713800	Merged-chr11-65713100-1	E7
Merged-chr16-24943762-2	chr16	24943401	24944000	Merged-chr16-24943824-1	E15
Merged-chr9-117790485-2	chr9	117790401	117790600	Merged-chr9-117790470-2	E5
Merged-chr1-47076641-2	chr1	47076401	47077000	Merged-chr1-47076582-2	E15
Merged-chr18-34954362-2	chr18	34954001	34955000	Merged-chr18-34954224-2	E2
Merged-chr8-84039436-2	chr8	84039001	84039600	Merged-chr8-84039571-2	E3
Merged-chr14-65097941-2	chr14	65097401	65098400	Merged-chr14-65097982-1	E2
Merged-chr16-31510331-2	chr16	31510201	31510600	Merged-chr16-31510262-1	E2
Merged-chr5-38319325-2	chr5	38319001	38320000	Merged-chr5-38319149-1	E2
Merged-chr1-161250997-2	chr1	161250601	161251200	Merged-chr1-161251094-1	E2
Merged-chr17-47739200-2	chr17	47737001	47740000	Merged-chr17-47739899-2	E2
Merged-chr8-10060634-2	chr8	10057401	10062800	Merged-chr8-10061167-2	E17
Merged-chr11-35610391-2	chr11	35610201	35610800	Merged-chr11-35610281-2	E4
Merged-chr9-111118231-2	chr9	111117801	111118800	Merged-chr9-111118162-1	E2
Merged-chr7-110701817-2	chr7	110701601	110702000	Merged-chr7-110701834-1	E15
Merged-chr7-112110821-2	chr7	112110601	112111200	Merged-chr7-112110741-1	E15
Merged-chr19-24224905-2	chr19	24224001	24225400	Merged-chr19-24225110-2	E2
Merged-chr8-123332821-2	chr8	123332201	123333600	Merged-chr8-123332742-2	E2
Merged-chr4-119105725-2	chr4	119105401	119106200	Merged-chr4-119105649-1	E2
Merged-chr8-107150581-2	chr8	107150201	107151200	Merged-chr8-107150461-1	E2
Merged-chr2-172412661-2	chr2	172412601	172412800	Merged-chr2-172412622-2	E4
Merged-chr1-134061188-2	chr1	134060801	134061600	Merged-chr1-134061175-2	E2
Merged-chr16-92058378-2	chr16	92057601	92059400	Merged-chr16-92058255-2	E2
Merged-chr17-56511519-2	chr17	56510001	56512400	Merged-chr17-56511838-1	E2
Merged-chr6-8209473-2	chr6	8209001	8209800	Merged-chr6-8209546-2	E2
Merged-chr12-105322358-2	chr12	105322001	105322600	Merged-chr12-105322416-1	E15
Merged-chr5-77544245-2	chr5	77544001	77544800	Merged-chr5-77544089-2	E5
Merged-chr15-83453990-2	chr15	83453801	83454200	Merged-chr15-83453979-2	E7
Merged-chr5-148741010-2	chr5	148739801	148742200	Merged-chr5-148741019-2	E13
Merged-chr14-57665026-2	chr14	57664201	57665600	Merged-chr14-57665151-2	E2
Merged-chr2-169849318-2	chr2	169849001	169849800	Merged-chr2-169849235-2	E3
Merged-chr2-26171027-2	chr2	26170801	26171200	Merged-chr2-26171054-2	E3
Merged-chr13-76003720-2	chr13	76003201	76004000	Merged-chr13-76003840-1	E15
Merged-chr1-146427054-2	chr1	146426401	146427800	Merged-chr1-146427008-2	E14
Merged-chr13-54216193-2	chr13	54216001	54216400	Merged-chr13-54216185-2	E3
Merged-chr17-14818258-2	chr17	14818201	14818400	Merged-chr17-14818216-2	E14
Merged-chr14-55497504-2	chr14	55497401	55497600	Merged-chr14-55497508-2	E14
Merged-chr11-67017921-2	chr11	67016401	67019400	Merged-chr11-67017942-2	E13
Merged-chr8-70353272-2	chr8	70352601	70354200	Merged-chr8-70353143-2	E2
Merged-chr15-38250555-2	chr15	38248401	38251400	Merged-chr15-38251210-1	E6
Merged-chr8-123524106-2	chr8	123524001	123524400	Merged-chr8-123524012-2	E3
Merged-chr14-47356744-2	chr14	47356601	47356800	Merged-chr14-47356787-2	E4
Merged-chr9-100643347-2	chr9	100642801	100643800	Merged-chr9-100643394-2	E2
Merged-chr18-81042786-2	chr18	81040201	81046200	Merged-chr18-81042371-2	E6
Merged-chr2-74965661-2	chr2	74965401	74966000	Merged-chr2-74965622-2	E3
Merged-chr17-46651093-2	chr17	46649801	46652000	Merged-chr17-46651285-2	E2
Merged-chr3-57576300-2	chr3	57574801	57576800	Merged-chr3-57576799-2	E2
Merged-chr16-82596467-2	chr16	82595601	82597000	Merged-chr16-82596634-1	E14
Merged-chr7-38227817-2	chr7	38227201	38228400	Merged-chr7-38227833-1	E2
Merged-chr11-76295072-2	chr11	76294801	76295400	Merged-chr11-76295044-2	E13
Merged-chr5-137934039-2	chr5	137933201	137934400	Merged-chr5-137934278-2	E14
Merged-chr12-112938938-2	chr12	112937801	112939800	Merged-chr12-112939075-2	E3
Merged-chr8-80738548-2	chr8	80738201	80739000	Merged-chr8-80738496-1	E2
Merged-chr6-127692513-2	chr6	127692401	127692600	Merged-chr6-127692526-1	E3
Merged-chr6-72989156-2	chr6	72989001	72989400	Merged-chr6-72989112-1	E3
Merged-chr5-116525646-2	chr5	116525201	116525800	Merged-chr5-116525791-1	E5
Merged-chr8-128654691-2	chr8	128654601	128654800	Merged-chr8-128654681-1	E2
Merged-chr8-71526844-2	chr8	71526601	71527200	Merged-chr8-71526788-2	E2
Merged-chr7-16923869-2	chr7	16923201	16924600	Merged-chr7-16923837-1	E2
Merged-chr3-88643098-2	chr3	88642201	88643600	Merged-chr3-88643295-2	E8
Merged-chr5-105700477-2	chr5	105699601	105700800	Merged-chr5-105700754-1	E2
Merged-chr17-6476761-2	chr17	6476401	6477000	Merged-chr17-6476822-2	E2
Merged-chr4-154209982-2	chr4	154209001	154211000	Merged-chr4-154209964-1	E4
Merged-chr6-40071216-2	chr6	40071001	40071400	Merged-chr6-40071231-2	E15
Merged-chr14-31571905-2	chr14	31571601	31572800	Merged-chr14-31571610-2	E6
Merged-chr4-55350476-2	chr4	55350001	55350800	Merged-chr4-55350552-2	E2
Merged-chr7-79428160-2	chr7	79427001	79428800	Merged-chr7-79428420-2	E8
Merged-chr1-178707910-2	chr1	178707801	178708000	Merged-chr1-178707919-2	E5
Merged-chr4-8799684-2	chr4	8799601	8799800	Merged-chr4-8799667-2	E7
Merged-chr16-33584693-2	chr16	33583801	33585000	Merged-chr16-33584985-2	E2
Merged-chr8-122709634-2	chr8	122709401	122710200	Merged-chr8-122709467-1	E3
Merged-chr17-30576490-2	chr17	30575601	30577400	Merged-chr17-30576479-1	E2
Merged-chr7-81478433-2	chr7	81478201	81478600	Merged-chr7-81478466-2	E6
Merged-chr1-72255461-2	chr1	72255201	72256200	Merged-chr1-72255222-1	E13
Merged-chr11-97808624-2	chr11	97806601	97810200	Merged-chr11-97808847-2	E12
Merged-chrX-76174857-2	chrX	76174601	76175200	Merged-chrX-76174814-1	E15
Merged-chr7-133709026-2	chr7	133708601	133709800	Merged-chr7-133708852-1	E2
Merged-chr4-40143450-2	chr4	40143001	40144000	Merged-chr4-40143400-2	E2
Merged-chr14-64174604-2	chr14	64174201	64174800	Merged-chr14-64174708-2	E14
Merged-chr18-36328796-2	chr18	36328601	36329200	Merged-chr18-36328691-2	E2
Merged-chr18-74391682-2	chr18	74391401	74392000	Merged-chr18-74391664-2	E15
Merged-chr3-37966436-2	chr3	37966201	37966800	Merged-chr3-37966372-2	E5
Merged-chr7-75553831-2	chr7	75553601	75554000	Merged-chr7-75553862-1	E15
Merged-chr4-120187220-2	chr4	120187001	120187600	Merged-chr4-120187139-1	E14
Merged-chr2-180100084-2	chr2	180099401	180101400	Merged-chr2-180099768-2	E3
Merged-chr13-23757593-2	chr13	23757201	23758400	Merged-chr13-23757386-1	E13
Merged-chr17-35829918-2	chr17	35829601	35830200	Merged-chr17-35829936-1	E2
Merged-chr18-4321256-2	chr18	4321001	4321800	Merged-chr18-4321111-1	E15
Merged-chr11-36221395-2	chr11	36221001	36221800	Merged-chr11-36221390-1	E15
Merged-chr5-37729075-2	chr5	37728801	37729200	Merged-chr5-37729149-2	E6
Merged-chr7-141111116-2	chr7	141110801	141111600	Merged-chr7-141111031-2	E7
Merged-chr9-61366594-2	chr9	61366201	61367400	Merged-chr9-61366388-2	E14
Merged-chr7-35056359-2	chr7	35055801	35056800	Merged-chr7-35056417-2	E2
Merged-chr16-22956285-2	chr16	22956201	22956400	Merged-chr16-22956270-2	E3
Merged-chr19-43469631-2	chr19	43469401	43470000	Merged-chr19-43469562-2	E3
Merged-chr8-40187628-2	chr8	40187201	40187800	Merged-chr8-40187755-1	E15
Merged-chr10-95271263-2	chr10	95270201	95272600	Merged-chr10-95271125-2	E10
Merged-chr5-37313598-2	chr5	37313401	37314000	Merged-chr5-37313496-2	E7
Merged-chr5-106574554-2	chr5	106574001	106575000	Merged-chr5-106574608-1	E2
Merged-chr7-126167744-2	chr7	126167601	126167800	Merged-chr7-126167787-1	E8
Merged-chr2-18998150-2	chr2	18997401	18998800	Merged-chr2-18998200-2	E2
Merged-chr12-26315185-2	chr12	26315001	26315400	Merged-chr12-26315170-2	E15
Merged-chr3-31094809-2	chr3	31094401	31096000	Merged-chr3-31094418-2	E2
Merged-chr1-58424768-2	chr1	58424201	58425400	Merged-chr1-58424736-2	E13
Merged-chr3-19694277-2	chr3	19694001	19694800	Merged-chr3-19694153-2	E2
Merged-chr2-91310278-2	chr2	91309201	91312400	Merged-chr2-91309756-2	E17
Merged-chr6-127735488-2	chr6	127735201	127735600	Merged-chr6-127735575-1	E4
Merged-chr11-22372931-2	chr11	22372601	22373200	Merged-chr11-22372962-2	E5
Merged-chr9-47077149-2	chr9	47077001	47077200	Merged-chr9-47077198-1	E3
Merged-chr8-122318186-2	chr8	122317201	122319200	Merged-chr8-122318172-2	E3
Merged-chr17-48101092-2	chr17	48100801	48101400	Merged-chr17-48101084-2	E13
Merged-chr11-3290341-2	chr11	3288401	3292400	Merged-chr11-3290281-1	E2
Merged-chr17-66720740-2	chr17	66720601	66720800	Merged-chr17-66720780-1	E5
Merged-chr5-12847430-2	chr5	12847001	12848000	Merged-chr5-12847360-2	E14
Merged-chr2-28538101-2	chr2	28538001	28538200	Merged-chr2-28538101-1	E7
Merged-chr2-146855963-2	chr2	146855801	146856200	Merged-chr2-146855925-2	E2
Merged-chr11-5840390-2	chr11	5840001	5840600	Merged-chr11-5840480-2	E4
Merged-chr3-67504727-2	chr3	67504001	67505200	Merged-chr3-67504853-2	E15
Merged-chr2-32168848-2	chr2	32168001	32171200	Merged-chr2-32168095-2	E12
Merged-chr1-90405171-2	chr1	90404801	90405600	Merged-chr1-90405141-1	E14
Merged-chr9-66658851-2	chr9	66658401	66659200	Merged-chr9-66658902-2	E5
Merged-chr4-115918186-2	chr4	115917801	115918600	Merged-chr4-115918172-2	E2
Merged-chr4-138418512-2	chr4	138418401	138418600	Merged-chr4-138418523-2	E3
Merged-chr6-73010281-2	chr6	73010001	73010600	Merged-chr6-73010262-1	E14
Merged-chr10-110745200-2	chr10	110744801	110746000	Merged-chr10-110745000-2	E2
Merged-chr5-101095688-2	chr5	101095601	101095800	Merged-chr5-101095676-2	E5
Merged-chr10-86972259-2	chr10	86971801	86972800	Merged-chr10-86972217-2	E15
Merged-chr2-132577870-2	chr2	132577401	132578200	Merged-chr2-132577939-2	E2
Merged-chr1-177441767-2	chr1	177441401	177442000	Merged-chr1-177441834-2	E2
Merged-chr3-68565247-2	chr3	68565001	68565400	Merged-chr3-68565294-2	E14
Merged-chr19-24092215-2	chr19	24092001	24092400	Merged-chr19-24092229-1	E7
Merged-chr9-118875813-2	chr9	118875401	118876000	Merged-chr9-118875926-1	E14
Merged-chr6-49367918-2	chr6	49367801	49368200	Merged-chr6-49367835-1	E2
Merged-chr12-102950000-2	chr12	102949601	102951000	Merged-chr12-102949699-1	E1
Merged-chr13-49147649-2	chr13	49146201	49148400	Merged-chr13-49147998-1	E2
Merged-chr12-3691384-2	chr12	3690801	3692000	Merged-chr12-3691368-2	E13
Merged-chr1-12814732-2	chr1	12814401	12815400	Merged-chr1-12814564-2	E14
Merged-chr18-35022547-2	chr18	35021201	35023800	Merged-chr18-35022594-2	E13
Merged-chr11-26372174-2	chr11	26371601	26372800	Merged-chr11-26372147-2	E14
Merged-chr5-118436952-2	chr5	118436801	118437200	Merged-chr5-118436903-2	E2
Merged-chr19-50161024-2	chr19	50147401	50171600	Merged-chr19-50162547-2	E16
Merged-chr10-7211852-2	chr10	7211001	7212600	Merged-chr10-7211904-2	E2
Merged-chr2-133596766-2	chr2	133596601	133597000	Merged-chr2-133596731-2	E15
Merged-chr9-78050717-2	chr9	78050201	78051000	Merged-chr9-78050833-2	E14
Merged-chr17-28154139-2	chr17	28154001	28154200	Merged-chr17-28154178-2	E6
Merged-chr6-122883042-2	chr6	122882801	122883200	Merged-chr6-122883083-2	E8
Merged-chr7-30634676-2	chr7	30633601	30635400	Merged-chr7-30634851-2	E2
Merged-chr8-15077521-2	chr8	15077201	15078000	Merged-chr8-15077442-1	E5
Merged-chr6-115717549-2	chr6	115717201	115718200	Merged-chr6-115717398-2	E13
Merged-chr3-88473177-2	chr3	88472601	88473800	Merged-chr3-88473153-2	E14
Merged-chr5-116280595-2	chr5	116280401	116280800	Merged-chr5-116280590-2	E4
Merged-chr2-116979985-2	chr2	116979801	116980200	Merged-chr2-116979969-2	E3
Merged-chr14-56888027-2	chr14	56887801	56888200	Merged-chr14-56888054-2	E2
Merged-chr1-16618908-2	chr1	16618401	16619600	Merged-chr1-16618815-1	E2
Merged-chr7-97325533-2	chr7	97325001	97326200	Merged-chr7-97325465-2	E2
Merged-chr11-28171530-2	chr11	28171401	28171800	Merged-chr11-28171459-2	E14
Merged-chr7-143784262-2	chr7	143784001	143784600	Merged-chr7-143784224-2	E2
Merged-chr5-34513715-2	chr5	34513201	34514400	Merged-chr5-34513629-2	E2
Merged-chr12-86503916-2	chr12	86501801	86509800	Merged-chr12-86502032-2	E12
Merged-chr4-155320643-2	chr4	155320201	155320800	Merged-chr4-155320785-2	E14
Merged-chr19-56548250-2	chr19	56547801	56549200	Merged-chr19-56547999-2	E2
Merged-chr17-27556145-2	chr17	27554601	27557000	Merged-chr17-27556489-2	E2
Merged-chr3-121736904-2	chr3	121736601	121737800	Merged-chr3-121736607-2	E14
Merged-chr8-89032640-2	chr8	89032401	89033000	Merged-chr8-89032580-2	E2
Merged-chr10-50592757-2	chr10	50592401	50593200	Merged-chr10-50592714-1	E2
Merged-chr7-112760963-2	chr7	112760801	112761200	Merged-chr7-112760926-2	E8
Merged-chr9-99158716-2	chr9	99158201	99159600	Merged-chr9-99158532-2	E14
Merged-chr7-19255566-2	chr7	19255201	19256000	Merged-chr7-19255531-2	E2
Merged-chr9-31316179-2	chr9	31316001	31316400	Merged-chr9-31316158-2	E3
Merged-chr18-49755486-2	chr18	49755201	49756000	Merged-chr18-49755371-2	E2
Merged-chr8-71464419-2	chr8	71462801	71465600	Merged-chr8-71464637-1	E2
Merged-chr2-173022273-2	chr2	173021601	173022800	Merged-chr2-173022346-2	E2
Merged-chr12-117450330-2	chr12	117450001	117450600	Merged-chr12-117450359-2	E13
Merged-chr12-3781171-2	chr12	3780601	3781600	Merged-chr12-3781242-2	E2
Merged-chr4-145574940-2	chr4	145574001	145575800	Merged-chr4-145574979-1	E14
Merged-chr1-39192991-2	chr1	39192401	39194600	Merged-chr1-39192482-2	E2
Merged-chr7-64287729-2	chr7	64287201	64288200	Merged-chr7-64287758-1	E2
Merged-chr11-49728204-2	chr11	49727201	49729400	Merged-chr11-49728108-2	E6
Merged-chrX-20356481-2	chrX	20356001	20357200	Merged-chrX-20356361-2	E14
Merged-chr16-93308579-2	chr16	93306801	93309200	Merged-chr16-93309158-2	E6
Merged-chr7-3332030-2	chr7	3331601	3332400	Merged-chr7-3332060-1	E2
Merged-chr10-118121782-2	chr10	118120801	118122200	Merged-chr10-118122064-2	E14
Merged-chr7-99632730-2	chr7	99631601	99634400	Merged-chr7-99632459-1	E6
Merged-chr2-170131032-2	chr2	170130201	170131600	Merged-chr2-170131164-2	E2
Merged-chr6-97048128-2	chr6	97046401	97048800	Merged-chr6-97048656-2	E14
Merged-chr7-44602383-2	chr7	44601801	44602600	Merged-chr7-44602565-2	E12
Merged-chr17-28232731-2	chr17	28232401	28233400	Merged-chr17-28232562-1	E2
Merged-chr8-122460706-2	chr8	122460001	122461400	Merged-chr8-122460712-2	E2
Merged-chr11-70764471-2	chr11	70763801	70765000	Merged-chr11-70764541-1	E2
Merged-chr9-63458487-2	chr9	63445001	63464000	Merged-chr9-63462474-2	E17
Merged-chr2-162568864-2	chr2	162568401	162569200	Merged-chr2-162568927-1	E15
Merged-chr14-114959931-2	chr14	114959801	114960200	Merged-chr14-114959862-2	E5
Merged-chr12-8499810-2	chr12	8498201	8501000	Merged-chr12-8500019-1	E2
Merged-chr4-114987118-2	chr4	114986601	114987400	Merged-chr4-114987236-2	E2
Merged-chr11-107135648-2	chr11	107134801	107136000	Merged-chr11-107135895-2	E14
Merged-chr2-26299898-2	chr2	26298001	26301000	Merged-chr2-26300296-2	E3
Merged-chr15-102005521-2	chr15	102005001	102006000	Merged-chr15-102005541-2	E3
Merged-chr2-136891085-2	chr2	136890801	136891400	Merged-chr2-136891069-2	E2
Merged-chr7-79246411-2	chr7	79246201	79246600	Merged-chr7-79246421-2	E13
Merged-chr10-68252812-2	chr10	68252601	68253000	Merged-chr10-68252823-2	E4
Merged-chrX-107858430-2	chrX	107858201	107858800	Merged-chrX-107858360-2	E15
Merged-chr17-34651445-2	chr17	34650201	34652200	Merged-chr17-34651689-1	E8
Merged-chr4-154183285-2	chr4	154182601	154184200	Merged-chr4-154183169-2	E6
Merged-chr18-76657901-2	chr18	76657801	76658000	Merged-chr18-76657902-2	E4
Merged-chr2-122118159-2	chr2	122117801	122118400	Merged-chr2-122118218-2	E2
Merged-chr6-88235934-2	chr6	88235201	88236200	Merged-chr6-88236168-1	E3
Merged-chr11-87966248-2	chr11	87965601	87966600	Merged-chr11-87966396-1	E3
Merged-chr10-115184939-2	chr10	115184601	115185200	Merged-chr10-115184977-1	E15
Merged-chr4-133263047-2	chr4	133262601	133263400	Merged-chr4-133263093-2	E3
Merged-chr11-116885915-2	chr11	116885401	116886200	Merged-chr11-116886030-2	E13
Merged-chr7-25251340-2	chr7	25251001	25251800	Merged-chr7-25251280-1	E2
Merged-chr9-35041754-2	chr9	35041601	35042000	Merged-chr9-35041708-1	E14
Merged-chr15-100965378-2	chr15	100965001	100966000	Merged-chr15-100965255-2	E6
Merged-chr18-81669239-2	chr18	81668801	81669600	Merged-chr18-81669278-2	E5
Merged-chr7-34877068-2	chr7	34877001	34877200	Merged-chr7-34877036-2	E15
Merged-chr12-65479292-2	chr12	65479201	65479400	Merged-chr12-65479283-1	E13
Merged-chr4-40908403-2	chr4	40908201	40908600	Merged-chr4-40908406-2	E2
Merged-chr8-83584965-2	chr8	83584801	83585200	Merged-chr8-83584930-2	E7
Merged-chr6-86526028-2	chr6	86525201	86527400	Merged-chr6-86525756-2	E2
Merged-chr15-83961290-2	chr15	83961201	83961400	Merged-chr15-83961279-1	E4
Merged-chr11-102624279-2	chr11	102623801	102624800	Merged-chr11-102624258-1	E3
Merged-chr2-114178060-2	chr2	114177401	114178800	Merged-chr2-114178019-1	E13
Merged-chr18-67348474-2	chr18	67346401	67350800	Merged-chr18-67348348-2	E6
Merged-chr18-38601435-2	chr18	38599801	38602600	Merged-chr18-38601670-2	E2
Merged-chr6-88886288-2	chr6	88885201	88886800	Merged-chr6-88886576-2	E9
Merged-chr2-101137021-2	chr2	101136801	101137200	Merged-chr2-101137041-2	E15
Merged-chr2-30982424-2	chr2	30981601	30983200	Merged-chr2-30982448-1	E2
Merged-chr2-157027468-2	chr2	157027401	157027600	Merged-chr2-157027436-2	E2
Merged-chr8-119516027-2	chr8	119515801	119516600	Merged-chr8-119515853-2	E13
Merged-chr1-86018515-2	chr1	86018001	86019000	Merged-chr1-86018529-2	E2
Merged-chr8-71596056-2	chr8	71595801	71596200	Merged-chr8-71596112-2	E8
Merged-chr19-29325279-2	chr19	29324801	29325600	Merged-chr19-29325358-2	E13
Merged-chr14-54383689-2	chr14	54383401	54383800	Merged-chr14-54383777-2	E13
Merged-chr5-140557053-2	chr5	140556801	140557200	Merged-chr5-140557106-1	E3
Merged-chr7-17056375-2	chr7	17056201	17056800	Merged-chr7-17056249-1	E2
Merged-chr7-116263735-2	chr7	116263201	116264800	Merged-chr7-116263469-2	E3
Merged-chr10-49417560-2	chr10	49417201	49417800	Merged-chr10-49417619-2	E15
Merged-chr4-128715986-2	chr4	128715601	128716400	Merged-chr4-128715972-2	E2
Merged-chr17-27761956-2	chr17	27761801	27762200	Merged-chr17-27761911-1	E14
Merged-chr14-104430985-2	chr14	104430801	104431200	Merged-chr14-104430970-1	E15
Merged-chr10-40301494-2	chr10	40301001	40301800	Merged-chr10-40301587-1	E2
Merged-chr6-72795058-2	chr6	72795001	72795200	Merged-chr6-72795016-2	E2
Merged-chr5-64541791-2	chr5	64540401	64542800	Merged-chr5-64541982-1	E18
Merged-chr13-114175541-2	chr13	114170401	114189200	Merged-chr13-114171281-2	E17
Merged-chr17-80517345-2	chr17	80517201	80517400	Merged-chr17-80517389-2	E4
Merged-chr11-70687872-2	chr11	70687201	70688800	Merged-chr11-70687743-2	E2
Merged-chr4-138445302-2	chr4	138445001	138445800	Merged-chr4-138445204-2	E13
Merged-chr8-3279390-2	chr8	3278401	3280000	Merged-chr8-3279579-2	E2
Merged-chr7-30608617-2	chr7	30608201	30608800	Merged-chr7-30608734-2	E2
Merged-chr2-163054799-2	chr2	163054401	163055400	Merged-chr2-163054697-1	E2
Merged-chr8-78437299-2	chr8	78434601	78438400	Merged-chr8-78438097-1	E2
Merged-chr11-99785659-2	chr11	99785401	99786000	Merged-chr11-99785618-2	E5
Merged-chr14-19762861-2	chr14	19762201	19764800	Merged-chr14-19762221-1	E11
Merged-chr15-101228226-2	chr15	101228001	101228400	Merged-chr15-101228252-1	E2
Merged-chr5-105498815-2	chr5	105498401	105499600	Merged-chr5-105498630-2	E15
Merged-chr5-113800512-2	chr5	113800401	113800800	Merged-chr5-113800423-1	E3
Merged-chr8-84660288-2	chr8	84660001	84660400	Merged-chr8-84660375-1	E2
Merged-chr6-39415843-2	chr6	39415401	39416000	Merged-chr6-39415985-1	E11
Merged-chr17-30533265-2	chr17	30532801	30533800	Merged-chr17-30533230-1	E14
Merged-chr1-153733473-2	chr1	153733001	153734000	Merged-chr1-153733446-2	E3
Merged-chr11-52191132-2	chr11	52188201	52199000	Merged-chr11-52188663-2	E16
Merged-chr4-155654573-2	chr4	155652801	155655800	Merged-chr4-155654845-2	E2
Merged-chr19-5394386-2	chr19	5394201	5394600	Merged-chr19-5394372-2	E3
Merged-chr3-144643804-2	chr3	144643601	144644000	Merged-chr3-144643808-1	E5
Merged-chr4-134121521-2	chr4	134120801	134121800	Merged-chr4-134121741-1	E3
Merged-chr10-7149744-2	chr10	7149001	7150000	Merged-chr10-7149988-2	E10
Merged-chr7-37307262-2	chr7	37306601	37307600	Merged-chr7-37307424-2	E15
Merged-chr1-93305879-2	chr1	93305601	93306000	Merged-chr1-93305958-1	E2
Merged-chr7-54645549-2	chr7	54645001	54646000	Merged-chr7-54645597-2	E15
Merged-chr8-70408535-2	chr8	70408001	70409000	Merged-chr8-70408570-2	E3
Merged-chr11-119282662-2	chr11	119282201	119283000	Merged-chr11-119282724-2	E10
Merged-chr1-188681997-2	chr1	188681801	188682200	Merged-chr1-188681993-2	E15
Merged-chr5-136102276-2	chr5	136102001	136102400	Merged-chr5-136102351-2	E3
Merged-chr11-52368278-2	chr11	52368001	52368400	Merged-chr11-52368355-1	E12
Merged-chr11-61081621-2	chr11	61080601	61082400	Merged-chr11-61081741-1	E6
Merged-chr10-20153771-2	chr10	20153201	20154200	Merged-chr10-20153841-1	E12
Merged-chr7-134550588-2	chr7	134550401	134550800	Merged-chr7-134550575-2	E5
Merged-chr5-118816026-2	chr5	118815801	118816400	Merged-chr5-118815951-2	E14
Merged-chr7-16400615-2	chr7	16399801	16401400	Merged-chr7-16400629-1	E2
Merged-chr9-57131123-2	chr9	57130601	57131600	Merged-chr9-57131145-1	E2
Merged-chr14-8214148-2	chr14	8214001	8214200	Merged-chr14-8214195-2	E13
Merged-chr10-77814595-2	chr10	77814001	77814800	Merged-chr10-77814790-2	E4
Merged-chr6-147145544-2	chr6	147145201	147146000	Merged-chr6-147145487-2	E3
Merged-chr7-27258245-2	chr7	27257001	27260000	Merged-chr7-27257989-2	E2
Merged-chr13-59097258-2	chr13	59095601	59100000	Merged-chr13-59096715-1	E6
Merged-chr7-127254516-2	chr7	127253801	127255000	Merged-chr7-127254631-2	E2
Merged-chr1-54754435-2	chr1	54754201	54754600	Merged-chr1-54754469-2	E5
Merged-chr19-11299324-2	chr19	11299201	11299600	Merged-chr19-11299247-2	E13
Merged-chr17-65648965-2	chr17	65648401	65649600	Merged-chr17-65648930-1	E3
Merged-chr9-110408128-2	chr9	110407601	110408600	Merged-chr9-110408155-2	E2
Merged-chr10-120171772-2	chr10	120171201	120172600	Merged-chr10-120171643-1	E13
Merged-chr11-95963577-2	chr11	95963401	95963800	Merged-chr11-95963554-1	E8
Merged-chr2-27122259-2	chr2	27121201	27123400	Merged-chr2-27122217-2	E4
Merged-chr11-99851281-2	chr11	99851001	99851400	Merged-chr11-99851362-2	E5
Merged-chr11-95126682-2	chr11	95126601	95126800	Merged-chr11-95126664-1	E2
Merged-chr2-152804511-2	chr2	152804401	152804600	Merged-chr2-152804521-2	E2
Merged-chr19-42147831-2	chr19	42147001	42148800	Merged-chr19-42147761-2	E2
Merged-chr11-70737859-2	chr11	70737601	70738000	Merged-chr11-70737917-2	E4
Merged-chr17-35897526-2	chr17	35896601	35898000	Merged-chr17-35897752-1	E2
Merged-chr1-167002980-2	chr1	167002601	167004000	Merged-chr1-167002659-1	E1
Merged-chr9-37233196-2	chr9	37232001	37233800	Merged-chr9-37233491-1	E3
Merged-chr10-41467419-2	chr10	41467001	41467800	Merged-chr10-41467437-2	E13
Merged-chr5-111753822-2	chr5	111753401	111754400	Merged-chr5-111753744-2	E14
Merged-chr19-21815795-2	chr19	21814001	21816400	Merged-chr19-21816390-2	E9
Merged-chr17-45564396-2	chr17	45563801	45564800	Merged-chr17-45564492-2	E2
Merged-chr7-44360340-2	chr7	44359801	44360800	Merged-chr7-44360379-1	E2
Merged-chr15-101116732-2	chr15	101115601	101117200	Merged-chr15-101117063-2	E4
Merged-chr2-181497121-2	chr2	181496801	181497800	Merged-chr2-181496941-1	E2
Merged-chr3-152265895-2	chr3	152265401	152266400	Merged-chr3-152265890-2	E2
Merged-chr1-86434573-2	chr1	86434001	86435000	Merged-chr1-86434645-1	E2
Merged-chr5-113330311-2	chr5	113329801	113330600	Merged-chr5-113330421-1	E13
Merged-chr12-86466143-2	chr12	86465401	86466400	Merged-chr12-86466385-2	E11
Merged-chr5-110770370-2	chr5	110770001	110771200	Merged-chr5-110770140-2	E2
Merged-chr11-117976262-2	chr11	117975801	117976800	Merged-chr11-117976224-1	E2
Merged-chr1-78657811-2	chr1	78657401	78658600	Merged-chr1-78657622-2	E2
Merged-chr10-69814339-2	chr10	69805001	69818000	Merged-chr10-69817177-2	E17
Merged-chr8-13929314-2	chr8	13928801	13929600	Merged-chr8-13929427-2	E7
Merged-chr16-95093868-2	chr16	95093601	95094000	Merged-chr16-95093936-1	E15
Merged-chr15-59189542-2	chr15	59189401	59189600	Merged-chr15-59189584-2	E3
Merged-chr3-94479670-2	chr3	94479401	94479800	Merged-chr3-94479740-2	E1
Merged-chrY-90799854-2	chrY	90799401	90800200	Merged-chrY-90799908-2	E11
Merged-chr4-156055454-2	chr4	156055201	156055800	Merged-chr4-156055408-2	E8
Merged-chr18-74827180-2	chr18	74827001	74827400	Merged-chr18-74827159-2	E3
Merged-chr2-25365427-2	chr2	25364801	25365800	Merged-chr2-25365553-1	E2
Merged-chr7-127708583-2	chr7	127707401	127709200	Merged-chr7-127708865-2	E2
Merged-chr4-33248020-2	chr4	33247401	33248600	Merged-chr4-33248040-1	E2
Merged-chr8-106404994-2	chr8	106404601	106405200	Merged-chr8-106405087-2	E3
Merged-chr3-96697112-2	chr3	96696201	96697800	Merged-chr3-96697223-1	E2
Merged-chr14-48655258-2	chr14	48654801	48655800	Merged-chr14-48655215-2	E2
Merged-chr17-84186843-2	chr17	84186201	84187200	Merged-chr17-84186986-2	E2
Merged-chr7-142251128-2	chr7	142251001	142251200	Merged-chr7-142251155-1	E6
Merged-chr5-118322017-2	chr5	118321601	118322200	Merged-chr5-118322133-1	E3
Merged-chr1-119050156-2	chr1	119050001	119050400	Merged-chr1-119050112-1	E2
Merged-chr12-28972143-2	chr12	28972001	28972200	Merged-chr12-28972186-2	E5
Merged-chr5-36582236-2	chr5	36581401	36582600	Merged-chr5-36582471-1	E2
Merged-chr9-65196857-2	chr9	65196201	65198000	Merged-chr9-65196614-1	E14
Merged-chr16-78294983-2	chr16	78294601	78295200	Merged-chr16-78295066-2	E15
Merged-chr12-26068344-2	chr12	26068001	26068800	Merged-chr12-26068287-2	E3
Merged-chr10-110856146-2	chr10	110855001	110857200	Merged-chr10-110856192-2	E13
Merged-chr15-56693127-2	chr15	56692401	56693800	Merged-chr15-56693153-1	E2
Merged-chr11-4947470-2	chr11	4946601	4948400	Merged-chr11-4947440-2	E2
Merged-chr14-64585695-2	chr14	64585201	64586600	Merged-chr14-64585489-1	E1
Merged-chr4-134018628-2	chr4	134018001	134020200	Merged-chr4-134018155-1	E2
Merged-chr14-57525405-2	chr14	57524601	57526000	Merged-chr14-57525510-2	E2
Merged-chr16-17209280-2	chr16	17208401	17210800	Merged-chr16-17208959-2	E2
Merged-chr17-28346041-2	chr17	28345801	28346400	Merged-chr17-28345981-2	E3
Merged-chr19-30175094-2	chr19	30174801	30175400	Merged-chr19-30175088-1	E2
Merged-chr1-16824799-2	chr1	16824401	16825000	Merged-chr1-16824898-2	E14
Merged-chr12-99505895-2	chr12	99502401	99510800	Merged-chr12-99505189-2	E17
Merged-chr9-121108386-2	chr9	121107801	121109000	Merged-chr9-121108372-1	E3
Merged-chr4-155173714-2	chr4	155173601	155174000	Merged-chr4-155173628-2	E2
Merged-chr11-115187565-2	chr11	115187001	115188200	Merged-chr11-115187530-1	E2
Merged-chr9-52153490-2	chr9	52153401	52153600	Merged-chr9-52153480-1	E15
Merged-chr18-46525646-2	chr18	46525001	46526000	Merged-chr18-46525792-2	E2
Merged-chr4-133241168-2	chr4	133240401	133242000	Merged-chr4-133241135-2	E2
Merged-chr10-39107170-2	chr10	39106401	39107800	Merged-chr10-39107239-1	E13
Merged-chr11-99658658-2	chr11	99658401	99658800	Merged-chr11-99658716-2	E3
Merged-chr4-108349125-2	chr4	108348801	108349600	Merged-chr4-108349050-2	E14
Merged-chr8-24776084-2	chr8	24766401	24779800	Merged-chr8-24779068-1	E16
Merged-chr17-7187191-2	chr17	7187001	7187400	Merged-chr17-7187181-2	E7
Merged-chr13-67683735-2	chr13	67683401	67684200	Merged-chr13-67683669-2	E13
Merged-chr17-12370462-2	chr17	12370201	12370600	Merged-chr17-12370524-2	E14
Merged-chr4-13300380-2	chr4	13300001	13300800	Merged-chr4-13300359-2	E15
Merged-chr1-172350712-2	chr1	172350601	172351000	Merged-chr1-172350624-2	E3
Merged-chr12-71016389-2	chr12	71016001	71017200	Merged-chr12-71016178-2	E2
Merged-chr11-58982052-2	chr11	58981001	58983000	Merged-chr11-58982103-2	E8
Merged-chr7-142499269-2	chr7	142499201	142499400	Merged-chr7-142499238-2	E14
Merged-chr8-81353595-2	chr8	81353401	81353800	Merged-chr8-81353590-2	E15
Merged-chr15-99420750-2	chr15	99420401	99421200	Merged-chr15-99420700-2	E2
Merged-chr17-15376435-2	chr17	15374401	15377200	Merged-chr17-15377069-1	E2
Merged-chr9-53536866-2	chr9	53536401	53537800	Merged-chr9-53536631-1	E2
Merged-chr4-123746905-2	chr4	123745801	123748400	Merged-chr4-123746710-2	E11
Merged-chr11-11114163-2	chr11	11113801	11114800	Merged-chr11-11114026-1	E2
Merged-chr5-105001341-2	chr5	105001201	105001600	Merged-chr5-105001281-2	E5
Merged-chr17-88707949-2	chr17	88707801	88708000	Merged-chr17-88707997-2	E4
Merged-chr11-102407573-2	chr11	102406801	102408000	Merged-chr11-102407746-1	E2
Merged-chr18-70599895-2	chr18	70599801	70600000	Merged-chr18-70599890-2	E3
Merged-chr2-164671121-2	chr2	164671001	164671200	Merged-chr2-164671141-2	E5
Merged-chr1-132736524-2	chr1	132736401	132736600	Merged-chr1-132736548-2	E3
Merged-chr4-55203869-2	chr4	55203601	55204000	Merged-chr4-55203937-2	E3
Merged-chr2-168791111-2	chr2	168790401	168791600	Merged-chr2-168791221-1	E13
Merged-chr5-18688365-2	chr5	18687201	18688800	Merged-chr5-18688729-2	E14
Merged-chr2-167672394-2	chr2	167672001	167672600	Merged-chr2-167672487-1	E14
Merged-chr7-80159719-2	chr7	80157801	80160400	Merged-chr7-80160337-2	E14
Merged-chr5-122821033-2	chr5	122820801	122821400	Merged-chr5-122820966-2	E2
Merged-chr10-80400058-2	chr10	80399801	80400600	Merged-chr10-80399916-1	E2
Merged-chr4-118207120-2	chr4	118206001	118207600	Merged-chr4-118207439-2	E7
Merged-chr17-46555687-2	chr17	46554601	46556400	Merged-chr17-46555873-1	E2
Merged-chr1-180933933-2	chr1	180933801	180934200	Merged-chr1-180933866-2	E13
Merged-chr7-64483125-2	chr7	64465201	64497200	Merged-chr7-64485049-1	E16
Merged-chr11-120624792-2	chr11	120624401	120625000	Merged-chr11-120624884-1	E2
Merged-chr1-190169066-2	chr1	190168601	190169600	Merged-chr1-190169031-2	E2
Merged-chr2-168023656-2	chr2	168023201	168024000	Merged-chr2-168023712-2	E6
Merged-chr7-16313938-2	chr7	16313601	16314400	Merged-chr7-16313875-2	E2
Merged-chr8-12926183-2	chr8	12924801	12927200	Merged-chr8-12926365-2	E3
Merged-chr4-106989143-2	chr4	106989001	106989400	Merged-chr4-106989086-1	E3
Merged-chr11-54163206-2	chr11	54163001	54163800	Merged-chr11-54163011-1	E3
Merged-chr12-86884430-2	chr12	86882401	86885200	Merged-chr12-86885060-2	E2
Merged-chr15-102203618-2	chr15	102203001	102204400	Merged-chr15-102203535-1	E2
Merged-chr10-77799110-2	chr10	77798801	77799600	Merged-chr10-77799019-2	E4
Merged-chr10-83346215-2	chr10	83345801	83346600	Merged-chr10-83346230-2	E13
Merged-chr16-28753202-2	chr16	28753001	28753400	Merged-chr16-28753203-1	E13
Merged-chr1-75589012-2	chr1	75588401	75589400	Merged-chr1-75589124-2	E13
Merged-chr17-12992444-2	chr17	12991601	12993000	Merged-chr17-12992587-1	E2
Merged-chr5-149636357-2	chr5	149635601	149637000	Merged-chr5-149636413-2	E2
Merged-chr2-126990087-2	chr2	126989801	126990200	Merged-chr2-126990174-1	E5
Merged-chr2-156531485-2	chr2	156531001	156532000	Merged-chr2-156531470-1	E7
Merged-chr11-32718572-2	chr11	32718001	32719000	Merged-chr11-32718644-2	E10
Merged-chr13-47044088-2	chr13	47043401	47045000	Merged-chr13-47043976-2	E2
Merged-chr1-35995896-2	chr1	35995401	35996200	Merged-chr1-35995991-2	E4
Merged-chr5-53110252-2	chr5	53110001	53110400	Merged-chr5-53110303-2	E5
Merged-chr13-23562756-2	chr13	23562201	23564200	Merged-chr13-23562312-2	E13
Merged-chr7-4825130-2	chr7	4823801	4825600	Merged-chr7-4825560-2	E14
Merged-chr7-145139277-2	chr7	145138401	145140200	Merged-chr7-145139253-2	E13
Merged-chr10-14968012-2	chr10	14967801	14968600	Merged-chr10-14967824-2	E14
Merged-chr5-128439937-2	chr5	128438801	128441000	Merged-chr5-128439973-2	E14
Merged-chr6-89862011-2	chr6	89858801	89869000	Merged-chr6-89860122-2	E18
Merged-chr17-68937676-2	chr17	68936401	68938800	Merged-chr17-68937752-1	E17
Merged-chr9-95406848-2	chr9	95404801	95408000	Merged-chr9-95407296-1	E2
Merged-chr15-67018433-2	chr15	67018001	67018800	Merged-chr15-67018466-1	E14
Merged-chr4-16095476-2	chr4	16095201	16095800	Merged-chr4-16095451-2	E15
Merged-chr19-31251998-2	chr19	31238801	31257200	Merged-chr19-31255996-2	E17
Merged-chr6-147377840-2	chr6	147377601	147378000	Merged-chr6-147377880-2	E5
Merged-chr1-134555542-2	chr1	134555201	134555800	Merged-chr1-134555583-2	E2
Merged-chr8-123412799-2	chr8	123412201	123413000	Merged-chr8-123412998-2	E13
Merged-chr2-20665795-2	chr2	20665201	20666400	Merged-chr2-20665790-2	E13
Merged-chr5-142702079-2	chr5	142701001	142703000	Merged-chr5-142702157-1	E2
Merged-chr9-107612855-2	chr9	107612801	107613000	Merged-chr9-107612810-1	E3
Merged-chr15-78713161-2	chr15	78713001	78713400	Merged-chr15-78713122-1	E3
Merged-chr16-4679688-2	chr16	4679001	4680000	Merged-chr16-4679875-1	E2
Merged-chr9-57148403-2	chr9	57148201	57148600	Merged-chr9-57148406-2	E2
Merged-chr19-37207528-2	chr19	37206801	37208000	Merged-chr19-37207656-2	E2
Merged-chr2-158799234-2	chr2	158798001	158800000	Merged-chr2-158799467-1	E11
Merged-chr1-172027194-2	chr1	172026401	172027800	Merged-chr1-172027287-2	E2
Merged-chr12-21167878-2	chr12	21167601	21168000	Merged-chr12-21167955-2	E2
Merged-chr4-26944816-2	chr4	26944201	26945400	Merged-chr4-26944832-1	E14
Merged-chr11-115357667-2	chr11	115357601	115357800	Merged-chr11-115357633-2	E4
Merged-chr2-24167033-2	chr2	24166801	24167200	Merged-chr2-24167066-1	E18
Merged-chr17-17624868-2	chr17	17623801	17625600	Merged-chr17-17625036-2	E2
Merged-chr17-47711819-2	chr17	47711001	47712200	Merged-chr17-47712037-2	E3
Merged-chr11-6180985-2	chr11	6179601	6182000	Merged-chr11-6181170-2	E12
Merged-chr5-140584226-2	chr5	140584001	140584800	Merged-chr5-140584052-2	E3
Merged-chr17-74994097-2	chr17	74994001	74994200	Merged-chr17-74994093-1	E2
Merged-chr7-66690050-2	chr7	66689801	66690400	Merged-chr7-66689999-2	E2
Merged-chr9-21337969-2	chr9	21337601	21338600	Merged-chr9-21337838-1	E2
Merged-chr1-156423623-2	chr1	156423401	156423800	Merged-chr1-156423646-2	E7
Merged-chr11-98682761-2	chr11	98682601	98683200	Merged-chr11-98682622-2	E2
Merged-chr6-33126775-2	chr6	33126601	33127000	Merged-chr6-33126750-1	E15
Merged-chr2-10048517-2	chr2	10047801	10048800	Merged-chr2-10048734-1	E2
Merged-chr18-33950591-2	chr18	33950201	33950800	Merged-chr18-33950682-2	E2
Merged-chrX-77525315-2	chrX	77524601	77525800	Merged-chrX-77525430-1	E15
Merged-chr5-135249194-2	chr5	135248801	135249600	Merged-chr5-135249187-2	E3
Merged-chr4-10932494-2	chr4	10932201	10932600	Merged-chr4-10932587-2	E14
Merged-chr11-32619412-2	chr11	32619201	32619600	Merged-chr11-32619424-1	E3
Merged-chr15-73707603-2	chr15	73707401	73708200	Merged-chr15-73707406-2	E3
Merged-chr6-120579975-2	chr6	120579001	120580400	Merged-chr6-120580250-2	E2
Merged-chr4-117148616-2	chr4	117148401	117149200	Merged-chr4-117148431-2	E2
Merged-chr15-101553368-2	chr15	101553001	101553600	Merged-chr15-101553436-2	E3
Merged-chr10-61492268-2	chr10	61492201	61492400	Merged-chr10-61492235-1	E3
Merged-chr10-63157703-2	chr10	63157201	63158400	Merged-chr10-63157606-2	E6
Merged-chr3-137867221-2	chr3	137866801	137867400	Merged-chr3-137867342-1	E12
Merged-chr9-99576024-2	chr9	99575801	99576400	Merged-chr9-99575947-2	E2
Merged-chr2-118779679-2	chr2	118779201	118780000	Merged-chr2-118779758-1	E2
Merged-chr11-29775576-2	chr11	29774001	29779400	Merged-chr11-29774452-2	E6
Merged-chr3-5400967-2	chr3	5400601	5401200	Merged-chr3-5401034-1	E15
Merged-chr17-8205384-2	chr17	8205201	8205600	Merged-chr17-8205368-2	E5
Merged-chr1-166002926-2	chr1	166001401	166003600	Merged-chr1-166003351-1	E2
Merged-chr6-114684610-2	chr6	114684401	114684800	Merged-chr6-114684620-2	E7
Merged-chr3-57847481-2	chr3	57846801	57848400	Merged-chr3-57847362-1	E2
Merged-chr6-29419188-2	chr6	29419001	29419400	Merged-chr6-29419176-1	E4
Merged-chr1-181852992-2	chr1	181852401	181853200	Merged-chr1-181853183-2	E13
Merged-chr7-42598678-2	chr7	42594201	42600200	Merged-chr7-42600155-1	E16
Merged-chr9-15045244-2	chr9	15044601	15045800	Merged-chr9-15045287-1	E2
Merged-chr7-141042884-2	chr7	141042801	141043000	Merged-chr7-141042867-2	E3
Merged-chr2-121101582-2	chr2	121101201	121101800	Merged-chr2-121101663-2	E5
Merged-chr1-185983283-2	chr1	185977401	185985800	Merged-chr1-185984965-2	E16
Merged-chr15-6909961-2	chr15	6909801	6910200	Merged-chr15-6909922-2	E13
Merged-chr1-68049377-2	chr1	68047601	68050000	Merged-chr1-68049954-2	E16
Merged-chr17-31073445-2	chr17	31073201	31073600	Merged-chr17-31073490-1	E3
Merged-chr16-13818963-2	chr16	13818601	13819800	Merged-chr16-13818725-1	E2
Merged-chr9-43441303-2	chr9	43441201	43441600	Merged-chr9-43441206-1	E14
Merged-chr14-25318157-2	chr14	25317601	25318600	Merged-chr14-25318214-1	E2
Merged-chr15-77358763-2	chr15	77358401	77359200	Merged-chr15-77358726-1	E2
Merged-chr14-34303198-2	chr14	34302601	34303400	Merged-chr14-34303395-1	E14
Merged-chr9-49799015-2	chr9	49798801	49799200	Merged-chr9-49799029-2	E2
Merged-chr2-154426733-2	chr2	154426601	154426800	Merged-chr2-154426766-2	E2
Merged-chr13-29596948-2	chr13	29596801	29597200	Merged-chr13-29596896-2	E15
Merged-chr13-44409793-2	chr13	44409601	44410200	Merged-chr13-44409686-1	E13
Merged-chr11-102394531-2	chr11	102394201	102394800	Merged-chr11-102394562-2	E3
Merged-chr17-75551898-2	chr17	75551401	75552400	Merged-chr17-75551895-1	E2
Merged-chr1-136949159-2	chr1	136948401	136950000	Merged-chr1-136949118-1	E2
Merged-chr7-49400852-2	chr7	49400401	49401400	Merged-chr7-49400804-1	E2
Merged-chr13-38109149-2	chr13	38109001	38109200	Merged-chr13-38109198-1	E2
Merged-chr10-61146784-2	chr10	61146201	61148200	Merged-chr10-61146368-2	E2
Merged-chr15-73466757-2	chr15	73466401	73467000	Merged-chr15-73466813-2	E3
Merged-chr5-26413133-2	chr5	26413001	26413200	Merged-chr5-26413165-2	E5
Merged-chr13-51748620-2	chr13	51748001	51749200	Merged-chr13-51748640-2	E3
Merged-chr2-26461100-2	chr2	26461001	26461400	Merged-chr2-26461000-1	E12
Merged-chr2-28607561-2	chr2	28607401	28608000	Merged-chr2-28607421-2	E3
Merged-chr5-28169496-2	chr5	28169201	28169600	Merged-chr5-28169591-2	E3
Merged-chr19-30000022-2	chr19	29997601	30003600	Merged-chr19-29999443-1	E6
Merged-chr4-132155522-2	chr4	132155201	132155800	Merged-chr4-132155543-2	E13
Merged-chr6-115037796-2	chr6	115037401	115038000	Merged-chr6-115037891-2	E2
Merged-chr8-92011196-2	chr8	92011001	92011400	Merged-chr8-92011192-2	E4
Merged-chr2-115581208-2	chr2	115580801	115581400	Merged-chr2-115581316-2	E13
Merged-chr5-30907805-2	chr5	30907201	30908200	Merged-chr5-30907910-1	E2
Merged-chr7-63947948-2	chr7	63947201	63948400	Merged-chr7-63948095-2	E13
Merged-chr7-100663325-2	chr7	100663201	100663400	Merged-chr7-100663349-2	E13
Merged-chr15-9094592-2	chr15	9094401	9094800	Merged-chr15-9094584-1	E2
Merged-chr11-95514394-2	chr11	95513401	95515400	Merged-chr11-95514387-2	E2
Merged-chr9-66281803-2	chr9	66281601	66282000	Merged-chr9-66281805-2	E3
Merged-chr6-24955664-2	chr6	24954801	24956600	Merged-chr6-24955627-2	E2
Merged-chr7-19388973-2	chr7	19388601	19389400	Merged-chr7-19388945-2	E9
Merged-chr2-152180679-2	chr2	152180601	152180800	Merged-chr2-152180658-2	E2
Merged-chr15-81811465-2	chr15	81810601	81812200	Merged-chr15-81811529-2	E2
Merged-chr9-62166307-2	chr9	62166001	62166600	Merged-chr9-62166313-1	E4
Merged-chr3-122419950-2	chr3	122419401	122420600	Merged-chr3-122419899-1	E2
Merged-chr5-20881881-2	chr5	20881401	20882800	Merged-chr5-20881661-1	E2
Merged-chr15-36507937-2	chr15	36507801	36508000	Merged-chr15-36507974-1	E5
Merged-chr16-32117725-2	chr16	32117001	32118000	Merged-chr16-32117950-2	E6
Merged-chr15-98990322-2	chr15	98985801	98993000	Merged-chr15-98991244-2	E13
Merged-chr13-51070579-2	chr13	51070201	51071000	Merged-chr13-51070558-2	E14
Merged-chr12-33176078-2	chr12	33175801	33176200	Merged-chr12-33176156-2	E2
Merged-chr2-168080978-2	chr2	168079601	168082000	Merged-chr2-168081155-1	E2
Merged-chr4-15881280-2	chr4	15881201	15881400	Merged-chr4-15881259-1	E3
Merged-chr5-143288589-2	chr5	143288401	143288800	Merged-chr5-143288577-1	E3
Merged-chr17-31307920-2	chr17	31307801	31308000	Merged-chr17-31307940-2	E13
Merged-chr4-116721098-2	chr4	116720801	116721600	Merged-chr4-116720995-2	E2
Merged-chr9-108339409-2	chr9	108339201	108339600	Merged-chr9-108339417-1	E2
Merged-chr11-55264500-2	chr11	55264401	55264600	Merged-chr11-55264500-2	E5
Merged-chr5-106044530-2	chr5	106044401	106044800	Merged-chr5-106044460-2	E5
Merged-chr7-18957902-2	chr7	18957401	18958800	Merged-chr7-18957704-1	E2
Merged-chr9-43659370-2	chr9	43658601	43660200	Merged-chr9-43659339-2	E6
Merged-chr9-8004386-2	chr9	8003401	8005000	Merged-chr9-8004572-2	E2
Merged-chr12-111538385-2	chr12	111537401	111539400	Merged-chr12-111538369-1	E2
Merged-chr14-30826109-2	chr14	30825601	30826600	Merged-chr14-30826117-2	E2
Merged-chr6-125603564-2	chr6	125603201	125604400	Merged-chr6-125603328-2	E3
Merged-chr19-9066524-2	chr19	9066001	9067200	Merged-chr19-9066447-2	E14
Merged-chrX-12032180-2	chrX	12032001	12032400	Merged-chrX-12032160-2	E15
Merged-chr10-76067857-2	chr10	76067601	76068000	Merged-chr10-76067913-2	E15
Merged-chr12-86687824-2	chr12	86687601	86688200	Merged-chr12-86687747-1	E2
Merged-chr7-4526420-2	chr7	4526001	4526800	Merged-chr7-4526439-2	E13
Merged-chr9-54586219-2	chr9	54585801	54586400	Merged-chr9-54586337-2	E13
Merged-chr11-58009519-2	chr11	58009401	58009800	Merged-chr11-58009437-2	E2
Merged-chr16-91423957-2	chr16	91423601	91424800	Merged-chr16-91423714-1	E6
Merged-chr2-165239753-2	chr2	165239601	165240000	Merged-chr2-165239705-1	E3
Merged-chr5-143515062-2	chr5	143514801	143515200	Merged-chr5-143515124-2	E8
Merged-chr7-31072463-2	chr7	31072201	31072600	Merged-chr7-31072525-1	E3
Merged-chr11-67011876-2	chr11	67011801	67012000	Merged-chr11-67011852-2	E14
Merged-chr6-71302574-2	chr6	71302401	71302800	Merged-chr6-71302548-2	E3
Merged-chr19-46328772-2	chr19	46328001	46329600	Merged-chr19-46328744-1	E2
Merged-chr19-7066676-2	chr19	7066401	7066800	Merged-chr19-7066751-1	E2
Merged-chr9-98726716-2	chr9	98726601	98726800	Merged-chr9-98726731-1	E5
Merged-chr14-63182924-2	chr14	63182801	63183200	Merged-chr14-63182848-2	E10
Merged-chr7-3206063-2	chr7	3203201	3207800	Merged-chr7-3206625-1	E13
Merged-chr4-138454151-2	chr4	138453001	138456600	Merged-chr4-138453502-2	E2
Merged-chr7-46393213-2	chr7	46393001	46393400	Merged-chr7-46393226-2	E4
Merged-chr5-134688855-2	chr5	134688001	134689600	Merged-chr5-134688910-2	E2
Merged-chr2-26237167-2	chr2	26236801	26237400	Merged-chr2-26237234-2	E2
Merged-chr4-140103688-2	chr4	140103401	140103800	Merged-chr4-140103775-2	E2
Merged-chr9-122540275-2	chr9	122540201	122540400	Merged-chr9-122540249-1	E15
Merged-chr17-36788976-2	chr17	36788801	36789200	Merged-chr17-36788952-1	E15
Merged-chr6-31307211-2	chr6	31307001	31307400	Merged-chr6-31307221-1	E15
Merged-chr5-101925726-2	chr5	101924801	101926200	Merged-chr5-101925952-2	E7
Merged-chr1-161002447-2	chr1	161000601	161004600	Merged-chr1-161002294-2	E10
Merged-chr3-11212435-2	chr3	11212001	11212800	Merged-chr3-11212470-1	E14
Merged-chr17-28150252-2	chr17	28150201	28150400	Merged-chr17-28150203-2	E14
Merged-chr13-76384425-2	chr13	76383801	76385400	Merged-chr13-76384250-2	E2
Merged-chr12-86167431-2	chr12	86167201	86167800	Merged-chr12-86167361-2	E3
Merged-chr11-102317737-2	chr11	102317601	102318000	Merged-chr11-102317674-1	E12
Merged-chr11-3409093-2	chr11	3408801	3409200	Merged-chr11-3409186-1	E2
Merged-chr4-101509125-2	chr4	101508801	101509400	Merged-chr4-101509149-2	E2
Merged-chr15-44716224-2	chr15	44716001	44716600	Merged-chr15-44716148-2	E15
Merged-chr17-56762122-2	chr17	56761601	56762400	Merged-chr17-56762243-1	E2
Merged-chr4-88938481-2	chr4	88937801	88939000	Merged-chr4-88938562-2	E2
Merged-chr11-108118914-2	chr11	108115401	108120400	Merged-chr11-108119928-2	E17
Merged-chr17-87282995-2	chr17	87282001	87284200	Merged-chr17-87282889-2	E2
Merged-chr9-37054320-2	chr9	37054001	37054600	Merged-chr9-37054339-2	E2
Merged-chr6-147209046-2	chr6	147207601	147211600	Merged-chr6-147208491-2	E17
Merged-chr8-84995853-2	chr8	84995601	84996200	Merged-chr8-84995806-2	E2
Merged-chr4-131912989-2	chr4	131911401	131915000	Merged-chr4-131912778-2	E1
Merged-chr2-163481863-2	chr2	163481601	163482400	Merged-chr2-163481725-1	E2
Merged-chr4-9844373-2	chr4	9843001	9845000	Merged-chr4-9844745-1	E2
Merged-chr10-60801492-2	chr10	60801201	60801600	Merged-chr10-60801584-2	E14
Merged-chr10-67019123-2	chr10	67019001	67019200	Merged-chr10-67019146-1	E8
Merged-chr9-118653835-2	chr9	118653601	118654000	Merged-chr9-118653870-2	E7
Merged-chr11-67921819-2	chr11	67921201	67922800	Merged-chr11-67921637-2	E2
Merged-chr19-55099319-2	chr19	55098601	55099800	Merged-chr19-55099438-2	E2
Merged-chr1-136707567-2	chr1	136707201	136708200	Merged-chr1-136707433-2	E2
Merged-chr13-98926296-2	chr13	98925801	98926800	Merged-chr13-98926291-1	E2
Merged-chr2-31869795-2	chr2	31869401	31870000	Merged-chr2-31869890-2	E4
Merged-chr17-25109910-2	chr17	25109401	25111200	Merged-chr17-25109519-2	E7
Merged-chr11-79002957-2	chr11	79002001	79004200	Merged-chr11-79002814-2	E13
Merged-chr13-57949686-2	chr13	57949601	57949800	Merged-chr13-57949672-1	E4
Merged-chr11-120643587-2	chr11	120643001	120643800	Merged-chr11-120643773-1	E2
Merged-chr14-122534411-2	chr14	122534001	122534800	Merged-chr14-122534422-1	E2
Merged-chr2-172932289-2	chr2	172932201	172932400	Merged-chr2-172932278-1	E4
Merged-chr7-28491006-2	chr7	28490801	28491200	Merged-chr7-28491011-1	E2
Merged-chr8-117314772-2	chr8	117314601	117315000	Merged-chr8-117314744-2	E3
Merged-chr4-108780620-2	chr4	108779801	108781200	Merged-chr4-108780740-2	E2
Merged-chr7-36792773-2	chr7	36791801	36794800	Merged-chr7-36792246-2	E17
Merged-chr3-9540527-2	chr3	9540401	9540600	Merged-chr3-9540554-2	E7
Merged-chr8-70004506-2	chr8	70004401	70004600	Merged-chr8-70004512-2	E3
Merged-chr2-34920502-2	chr2	34920201	34920800	Merged-chr2-34920504-1	E3
Merged-chr14-32634518-2	chr14	32634201	32634800	Merged-chr14-32634536-2	E3
Merged-chr17-34068077-2	chr17	34067401	34069200	Merged-chr17-34067854-2	E6
Merged-chr19-7266055-2	chr19	7265401	7266600	Merged-chr19-7266109-2	E2
Merged-chr12-99776808-2	chr12	99776601	99777000	Merged-chr12-99776815-1	E5
Merged-chr3-65659276-2	chr3	65658801	65659800	Merged-chr3-65659252-2	E2
Merged-chr9-121314348-2	chr9	121314001	121314800	Merged-chr9-121314295-1	E2
Merged-chr8-31149900-2	chr8	31149401	31150400	Merged-chr8-31149899-1	E13
Merged-chr16-97322859-2	chr16	97322801	97323000	Merged-chr16-97322817-1	E15
Merged-chr17-3410498-2	chr17	3410401	3410600	Merged-chr17-3410496-2	E5
Merged-chr7-16766542-2	chr7	16765801	16767200	Merged-chr7-16766583-1	E4
Merged-chr5-146360586-2	chr5	146360401	146360800	Merged-chr5-146360572-2	E15
Merged-chr11-99665664-2	chr11	99665601	99665800	Merged-chr11-99665628-2	E6
Merged-chr7-110018503-2	chr7	110018201	110019000	Merged-chr7-110018405-1	E2
Merged-chr6-121481897-2	chr6	121481801	121482000	Merged-chr6-121481894-2	E5
Merged-chr7-130713643-2	chr7	130713201	130714200	Merged-chr7-130713586-2	E7
Merged-chr17-45685784-2	chr17	45684801	45686800	Merged-chr17-45685768-1	E2
Merged-chr14-56886256-2	chr14	56886201	56886400	Merged-chr14-56886212-1	E13
Merged-chr6-135294731-2	chr6	135294601	135294800	Merged-chr6-135294761-2	E4
Merged-chr4-107429538-2	chr4	107429401	107429600	Merged-chr4-107429576-2	E4
Merged-chr11-63533754-2	chr11	63533001	63534600	Merged-chr11-63533708-2	E14
Merged-chr11-31396915-2	chr11	31396401	31397600	Merged-chr11-31396829-2	E14
Merged-chr9-30942889-2	chr9	30942401	30943800	Merged-chr9-30942678-2	E2
Merged-chr5-81654215-2	chr5	81653801	81654600	Merged-chr5-81654229-2	E15
Merged-chr7-45916911-2	chr7	45916801	45917000	Merged-chr7-45916921-2	E13
Merged-chr15-81831692-2	chr15	81831601	81831800	Merged-chr15-81831684-2	E3
Merged-chr9-107676540-2	chr9	107675801	107677600	Merged-chr9-107676379-1	E2
Merged-chr2-25557910-2	chr2	25557201	25558600	Merged-chr2-25557919-1	E2
Merged-chr10-81037263-2	chr10	81037201	81037400	Merged-chr10-81037225-2	E3
Merged-chr4-136177405-2	chr4	136177201	136177800	Merged-chr4-136177310-2	E3
Merged-chr5-38656199-2	chr5	38655201	38656600	Merged-chr5-38656498-2	E13
Merged-chr8-105605693-2	chr8	105604801	105607400	Merged-chr8-105605286-2	E2
Merged-chr17-46093223-2	chr17	46092401	46093800	Merged-chr17-46093345-2	E6
Merged-chr1-36580411-2	chr1	36580001	36581200	Merged-chr1-36580222-2	E2
Merged-chr8-3579553-2	chr8	3579401	3579800	Merged-chr8-3579505-1	E3
Merged-chr6-126939423-2	chr6	126939001	126939600	Merged-chr6-126939545-1	E2
Merged-chr9-90163229-2	chr9	90162601	90164200	Merged-chr9-90163058-1	E2
Merged-chr9-21719353-2	chr9	21719001	21719600	Merged-chr9-21719405-1	E3
Merged-chr17-45629872-2	chr17	45629601	45630600	Merged-chr17-45629644-2	E2
Merged-chr10-67979832-2	chr10	67979601	67980200	Merged-chr10-67979763-2	E2
Merged-chr9-64195775-2	chr9	64195001	64196600	Merged-chr9-64195750-1	E8
Merged-chr7-4836435-2	chr7	4835801	4837200	Merged-chr7-4836369-2	E2
Merged-chr12-104534778-2	chr12	104534601	104535000	Merged-chr12-104534755-2	E4
Merged-chr10-130259651-2	chr10	130259401	130260000	Merged-chr10-130259601-2	E15
Merged-chr12-69076926-2	chr12	69076801	69077200	Merged-chr12-69076851-2	E15
Merged-chr2-26547872-2	chr2	26547201	26549000	Merged-chr2-26547643-2	E3
Merged-chr8-79640024-2	chr8	79639401	79640400	Merged-chr8-79640147-2	E2
Merged-chr7-101301998-2	chr7	101301201	101302400	Merged-chr7-101302195-2	E2
Merged-chr15-78648216-2	chr15	78646801	78649600	Merged-chr15-78648231-2	E4
Merged-chr11-106606196-2	chr11	106606001	106606400	Merged-chr11-106606192-1	E3
Merged-chr11-6274682-2	chr11	6274201	6275000	Merged-chr11-6274763-1	E2
Merged-chr15-88862939-2	chr15	88861601	88865200	Merged-chr15-88862477-2	E2
Merged-chrX-75382371-2	chrX	75381801	75383200	Merged-chrX-75382241-2	E13
Merged-chr15-84965715-2	chr15	84965601	84965800	Merged-chr15-84965730-1	E4
Merged-chr11-50602386-2	chr11	50601601	50603800	Merged-chr11-50602071-2	E2
Merged-chr8-56252522-2	chr8	56252001	56253000	Merged-chr8-56252544-2	E13
Merged-chr13-9832474-2	chr13	9826801	9834400	Merged-chr13-9834348-1	E16
Merged-chr6-122764842-2	chr6	122764201	122765200	Merged-chr6-122764983-2	E2
Merged-chr18-49832854-2	chr18	49832601	49833400	Merged-chr18-49832707-2	E2
Merged-chr18-85298966-2	chr18	85295801	85300600	Merged-chr18-85299732-2	E16
Merged-chr9-65201970-2	chr9	65201801	65202400	Merged-chr9-65201839-1	E13
Merged-chr1-63110772-2	chr1	63110001	63111600	Merged-chr1-63110743-2	E12
Merged-chr10-128525570-2	chr10	128524601	128526000	Merged-chr10-128525840-2	E2
Merged-chr5-113421149-2	chr5	113420801	113422000	Merged-chr5-113420897-2	E13
Merged-chr9-44094250-2	chr9	44094001	44094400	Merged-chr9-44094300-2	E3
Merged-chr3-90254524-2	chr3	90254201	90254800	Merged-chr3-90254548-1	E2
Merged-chr2-112265912-2	chr2	112265401	112266600	Merged-chr2-112265824-1	E2
Merged-chr18-44644021-2	chr18	44643801	44644200	Merged-chr18-44644041-1	E3
Merged-chr6-67145984-2	chr6	67145001	67146600	Merged-chr6-67146168-2	E13
Merged-chr4-124847921-2	chr4	124847801	124848200	Merged-chr4-124847841-1	E14
Merged-chr3-95887721-2	chr3	95887001	95888200	Merged-chr3-95887841-1	E10
Merged-chr5-125393195-2	chr5	125392601	125393600	Merged-chr5-125393289-2	E13
Merged-chr7-139827827-2	chr7	139827601	139828000	Merged-chr7-139827854-2	E4
Merged-chr1-84694981-2	chr1	84694801	84695200	Merged-chr1-84694962-2	E3
Merged-chr13-55374468-2	chr13	55374201	55374800	Merged-chr13-55374436-2	E4
Merged-chr8-20424923-2	chr8	20424801	20425200	Merged-chr8-20424845-1	E15
Merged-chr2-155142350-2	chr2	155138601	155146200	Merged-chr2-155142300-2	E9
Merged-chr4-144895070-2	chr4	144894801	144895600	Merged-chr4-144894940-1	E1
Merged-chr15-7226491-2	chr15	7226201	7226800	Merged-chr15-7226481-2	E15
Merged-chr4-61571669-2	chr4	61571201	61572000	Merged-chr4-61571738-2	E18
Merged-chr1-34075068-2	chr1	34075001	34075200	Merged-chr1-34075036-2	E2
Merged-chr8-108744277-2	chr8	108744201	108744400	Merged-chr8-108744254-2	E7
Merged-chr4-146173589-2	chr4	146173401	146173800	Merged-chr4-146173578-1	E18
Merged-chr19-7056950-2	chr19	7056201	7057800	Merged-chr19-7056899-2	E2
Merged-chr4-131284252-2	chr4	131283601	131285600	Merged-chr4-131283904-2	E4
Merged-chr11-98027082-2	chr11	98026801	98027400	Merged-chr11-98027063-1	E2
Merged-chr6-88198639-2	chr6	88198001	88199200	Merged-chr6-88198678-2	E2
Merged-chr15-82080125-2	chr15	82080001	82080200	Merged-chr15-82080150-1	E14
Merged-chr3-128641765-2	chr3	128640001	128644600	Merged-chr3-128641230-2	E16
Merged-chr17-27087388-2	chr17	27086401	27087800	Merged-chr17-27087676-1	E3
Merged-chr7-35334640-2	chr7	35334201	35335200	Merged-chr7-35334579-2	E2
Merged-chr7-82766770-2	chr7	82766401	82767000	Merged-chr7-82766840-2	E14
Merged-chr13-104911721-2	chr13	104910801	104912600	Merged-chr13-104911742-2	E14
Merged-chr15-7085232-2	chr15	7085001	7085400	Merged-chr15-7085263-2	E3
Merged-chr5-28177557-2	chr5	28175801	28180800	Merged-chr5-28176813-1	E1
Merged-chr5-135970349-2	chr5	135970201	135970400	Merged-chr5-135970397-2	E3
Merged-chr9-121332350-2	chr9	121332201	121332600	Merged-chr9-121332300-1	E3
Merged-chr6-34515580-2	chr6	34515201	34515800	Merged-chr6-34515659-2	E4
Merged-chr11-84662107-2	chr11	84662001	84662200	Merged-chr11-84662114-1	E1
Merged-chr9-105617524-2	chr9	105615001	105620200	Merged-chr9-105617448-2	E17
Merged-chr2-71388123-2	chr2	71387601	71389000	Merged-chr2-71387945-2	E13
Merged-chr1-53750076-2	chr1	53749801	53750200	Merged-chr1-53750151-1	E14
Merged-chr4-152352289-2	chr4	152352001	152352800	Merged-chr4-152352177-1	E14
Merged-chr16-17276868-2	chr16	17276201	17278600	Merged-chr16-17276336-2	E2
Merged-chr12-4917763-2	chr12	4917001	4918200	Merged-chr12-4917925-1	E2
Merged-chr11-20112988-2	chr11	20112201	20113400	Merged-chr11-20113175-2	E2
Merged-chr11-75510409-2	chr11	75509801	75511000	Merged-chr11-75510417-2	E2
Merged-chr1-153071719-2	chr1	153071601	153071800	Merged-chr1-153071737-2	E3
Merged-chr7-117278706-2	chr7	117278401	117279400	Merged-chr7-117278512-2	E5
Merged-chr1-12506555-2	chr1	12505001	12510400	Merged-chr1-12505409-2	E17
Merged-chr6-142756841-2	chr6	142756601	142757400	Merged-chr6-142756681-1	E2
Merged-chr2-71344804-2	chr2	71344401	71346000	Merged-chr2-71344407-2	E6
Merged-chr8-126839229-2	chr8	126838601	126840000	Merged-chr8-126839157-2	E3
Merged-chr4-133039207-2	chr4	133038401	133039800	Merged-chr4-133039313-2	E2
Merged-chr13-48945264-2	chr13	48941801	48949800	Merged-chr13-48944728-1	E9
Merged-chr1-134955740-2	chr1	134955401	134956000	Merged-chr1-134955779-2	E2
Merged-chr7-126884780-2	chr7	126883801	126885200	Merged-chr7-126885060-1	E2
Merged-chr15-34876488-2	chr15	34873201	34878400	Merged-chr15-34877175-2	E16
Merged-chr19-23162589-2	chr19	23162201	23163000	Merged-chr19-23162577-1	E12
Merged-chr14-121506327-2	chr14	121505601	121506800	Merged-chr14-121506453-2	E13
Merged-chr6-60930225-2	chr6	60929601	60931600	Merged-chr6-60929850-2	E16
Merged-chr9-8035787-2	chr9	8035601	8036000	Merged-chr9-8035774-2	E13
Merged-chr8-70429315-2	chr8	70428401	70430200	Merged-chr8-70429329-1	E4
Merged-chr6-99891852-2	chr6	99890801	99892600	Merged-chr6-99892004-2	E14
Merged-chr3-22298271-2	chr3	22298001	22299000	Merged-chr3-22298041-2	E14
Merged-chr1-180284201-2	chr1	180283601	180284800	Merged-chr1-180284201-2	E3
Merged-chr19-10457270-2	chr19	10456401	10458200	Merged-chr19-10457239-2	E2
Merged-chr16-94076631-2	chr16	94075801	94079000	Merged-chr16-94075862-2	E1
Merged-chr6-86212175-2	chr6	86211801	86213000	Merged-chr6-86211949-1	E17
Merged-chr7-142173609-2	chr7	142169601	142175000	Merged-chr7-142174918-2	E17
Merged-chr8-111803792-2	chr8	111803401	111804800	Merged-chr8-111803484-1	E14
Merged-chr16-30063990-2	chr16	30063001	30064600	Merged-chr16-30064180-1	E2
Merged-chr17-49368479-2	chr17	49368401	49368600	Merged-chr17-49368458-1	E5
Merged-chr5-27791449-2	chr5	27790801	27792200	Merged-chr5-27791397-1	E2
Merged-chr10-26695433-2	chr10	26695201	26695800	Merged-chr10-26695366-1	E2
Merged-chr2-112676707-2	chr2	112675001	112678000	Merged-chr2-112676914-2	E14
Merged-chr5-109139344-2	chr5	109139001	109140000	Merged-chr5-109139187-1	E15
Merged-chr7-139234429-2	chr7	139234001	139234600	Merged-chr7-139234557-1	E13
Merged-chr7-38061304-2	chr7	38061001	38061800	Merged-chr7-38061207-2	E2
Merged-chr6-82491124-2	chr6	82490801	82491400	Merged-chr6-82491147-2	E15
Merged-chr16-9281327-2	chr16	9280801	9282400	Merged-chr16-9281054-2	E14
Merged-chr7-133577266-2	chr7	133577001	133577400	Merged-chr7-133577332-1	E3
Merged-chr17-34388134-2	chr17	34384601	34391600	Merged-chr17-34388168-2	E6
Merged-chr15-88819267-2	chr15	88819001	88819400	Merged-chr15-88819333-2	E2
Merged-chr3-37671928-2	chr3	37670001	37672800	Merged-chr3-37672456-1	E11
Merged-chr4-152009002-2	chr4	152007601	152010000	Merged-chr4-152009204-2	E2
Merged-chr11-84333059-2	chr11	84333001	84333200	Merged-chr11-84333018-1	E7
Merged-chr7-35382913-2	chr7	35382401	35383200	Merged-chr7-35383026-2	E14
Merged-chr3-14886517-2	chr3	14886001	14887200	Merged-chr3-14886434-1	E2
Merged-chr7-80833209-2	chr7	80833001	80833400	Merged-chr7-80833218-2	E13
Merged-chr12-81776737-2	chr12	81775801	81778400	Merged-chr12-81776373-1	E10
Merged-chr6-51537016-2	chr6	51536601	51537200	Merged-chr6-51537132-2	E11
Merged-chr11-98743965-2	chr11	98743801	98744400	Merged-chr11-98743829-2	E3
Merged-chr2-38418183-2	chr2	38418001	38418400	Merged-chr2-38418166-1	E15
Merged-chr4-146054872-2	chr4	146053801	146055400	Merged-chr4-146055143-1	E14
Merged-chr4-57855465-2	chr4	57854801	57856000	Merged-chr4-57855529-2	E8
Merged-chr10-3941909-2	chr10	3941601	3942800	Merged-chr10-3941618-1	E13
Merged-chr4-124701323-2	chr4	124700401	124701800	Merged-chr4-124701546-1	E2
Merged-chr2-154421443-2	chr2	154421001	154421800	Merged-chr2-154421485-2	E2
Merged-chr9-102726433-2	chr9	102725401	102727400	Merged-chr9-102726466-1	E12
Merged-chr11-118348800-2	chr11	118348601	118349400	Merged-chr11-118348600-1	E3
Merged-chr4-13324982-2	chr4	13324801	13325200	Merged-chr4-13324964-2	E15
Merged-chr15-79932724-2	chr15	79932201	79933000	Merged-chr15-79932848-2	E2
Merged-chr4-45833615-2	chr4	45833401	45833800	Merged-chr4-45833630-2	E14
Merged-chr3-75651757-2	chr3	75650801	75652600	Merged-chr3-75651814-1	E12
Merged-chr2-18690177-2	chr2	18688601	18690800	Merged-chr2-18690654-1	E2
Merged-chr2-167072655-2	chr2	167072401	167073400	Merged-chr2-167072409-1	E13
Merged-chr3-95674956-2	chr3	95674601	95675400	Merged-chr3-95674912-1	E13
Merged-chr2-5667751-2	chr2	5667601	5668200	Merged-chr2-5667601-1	E14
Merged-chr17-28388611-2	chr17	28387801	28389200	Merged-chr17-28388722-2	E6
Merged-chr19-3930460-2	chr19	3929601	3931200	Merged-chr19-3930520-2	E2
Merged-chr13-55600191-2	chr13	55600001	55600400	Merged-chr13-55600182-1	E2
Merged-chr5-113217766-2	chr5	113217401	113218000	Merged-chr5-113217831-1	E6
Merged-chr4-84222961-2	chr4	84222601	84223200	Merged-chr4-84223021-2	E13
Merged-chr2-113829056-2	chr2	113828801	113829200	Merged-chr2-113829111-1	E3
Merged-chr11-77763793-2	chr11	77763001	77764400	Merged-chr11-77763886-1	E2
Merged-chr2-143547070-2	chr2	143546601	143547800	Merged-chr2-143546939-1	E1
Merged-chr5-145665540-2	chr5	145664201	145666000	Merged-chr5-145665980-2	E17
Merged-chr19-3451803-2	chr19	3451401	3452000	Merged-chr19-3451906-2	E7
Merged-chr16-37477287-2	chr16	37477001	37477600	Merged-chr16-37477274-1	E5
Merged-chr4-45139829-2	chr4	45139401	45140000	Merged-chr4-45139957-2	E4
Merged-chr4-130308235-2	chr4	130307801	130309200	Merged-chr4-130307970-1	E2
Merged-chr10-122300356-2	chr10	122300201	122300600	Merged-chr10-122300311-2	E5
Merged-chr10-80296253-2	chr10	80295601	80296800	Merged-chr10-80296306-2	E2
Merged-chr9-59291720-2	chr9	59291001	59292200	Merged-chr9-59291839-1	E2
Merged-chr12-54697079-2	chr12	54696801	54697800	Merged-chr12-54696857-1	E15
Merged-chr11-6389428-2	chr11	6388601	6390000	Merged-chr11-6389555-2	E2
Merged-chr11-9052033-2	chr11	9051801	9052200	Merged-chr11-9052065-2	E5
Merged-chr17-72836316-2	chr17	72836201	72836600	Merged-chr17-72836231-1	E3
Merged-chr13-55484722-2	chr13	55484601	55484800	Merged-chr13-55484744-2	E3
Merged-chr16-18289039-2	chr16	18288801	18289200	Merged-chr16-18289077-1	E2
Merged-chr16-26649744-2	chr16	26649601	26650000	Merged-chr16-26649688-1	E5
Merged-chr5-65764099-2	chr5	65763201	65765000	Merged-chr5-65764097-1	E2
Merged-chr11-94211637-2	chr11	94211401	94212200	Merged-chr11-94211474-2	E2
Merged-chr10-78091231-2	chr10	78091001	78091400	Merged-chr10-78091261-2	E4
Merged-chr10-41404460-2	chr10	41404401	41404600	Merged-chr10-41404420-2	E4
Merged-chr13-102896444-2	chr13	102895001	102898400	Merged-chr13-102896188-1	E11
Merged-chr3-35723450-2	chr3	35721601	35724600	Merged-chr3-35723800-2	E13
Merged-chr19-4046038-2	chr19	4045601	4046200	Merged-chr19-4046176-2	E13
Merged-chr16-8913985-2	chr16	8911001	8916200	Merged-chr16-8914369-1	E17
Merged-chr2-104494250-2	chr2	104493201	104495000	Merged-chr2-104494399-2	E2
Merged-chr12-84729786-2	chr12	84729601	84730000	Merged-chr12-84729771-2	E4
Merged-chr8-13786022-2	chr8	13785201	13786600	Merged-chr8-13786144-1	E2
Merged-chr3-9159238-2	chr3	9159001	9159400	Merged-chr3-9159275-2	E13
Merged-chr6-41605266-2	chr6	41604601	41606200	Merged-chr6-41605131-1	E2
Merged-chr15-96604397-2	chr15	96604001	96604600	Merged-chr15-96604493-2	E8
Merged-chr19-59585881-2	chr19	59585601	59586000	Merged-chr19-59585962-2	E13
Merged-chr9-75683924-2	chr9	75683601	75684200	Merged-chr9-75683947-2	E2
Merged-chr15-58063879-2	chr15	58061201	58067600	Merged-chr15-58063357-2	E17
Merged-chr11-80290203-2	chr11	80289601	80290600	Merged-chr11-80290306-2	E3
Merged-chr2-93334350-2	chr2	93333401	93335000	Merged-chr2-93334500-1	E2
Merged-chr5-64160094-2	chr5	64159201	64161000	Merged-chr5-64160088-2	E2
Merged-chr4-141570260-2	chr4	141569801	141571000	Merged-chr4-141570119-1	E13
Merged-chr4-117202450-2	chr4	117202001	117202600	Merged-chr4-117202599-1	E13
Merged-chr18-81252350-2	chr18	81252001	81253200	Merged-chr18-81252099-1	E13
Merged-chr2-91904961-2	chr2	91904601	91905600	Merged-chr2-91904821-2	E8
Merged-chr12-76710161-2	chr12	76709201	76711000	Merged-chr12-76710221-1	E2
Merged-chr3-3667680-2	chr3	3667001	3668000	Merged-chr3-3667860-2	E14
Merged-chr13-46429155-2	chr13	46428801	46429400	Merged-chr13-46429210-2	E3
Merged-chr16-35817428-2	chr16	35817201	35817600	Merged-chr16-35817455-2	E8
Merged-chr7-29471519-2	chr7	29471401	29471600	Merged-chr7-29471538-2	E3
Merged-chr5-120435710-2	chr5	120435201	120436600	Merged-chr5-120435519-1	E2
Merged-chr7-45639736-2	chr7	45639601	45640000	Merged-chr7-45639672-2	E2
Merged-chr4-32923582-2	chr4	32923401	32923800	Merged-chr4-32923564-1	E2
Merged-chr4-134343407-2	chr4	134343001	134344200	Merged-chr4-134343213-2	E2
Merged-chr3-36551489-2	chr3	36551401	36551600	Merged-chr3-36551478-2	E3
Merged-chr5-108434172-2	chr5	108433801	108434800	Merged-chr5-108434044-1	E2
Merged-chr17-31264707-2	chr17	31264601	31265000	Merged-chr17-31264614-1	E2
Merged-chr17-49291770-2	chr17	49289201	49295600	Merged-chr17-49291139-2	E17
Merged-chr2-163882892-2	chr2	163881401	163883400	Merged-chr2-163883383-2	E17
Merged-chr8-90876824-2	chr8	90876401	90877600	Merged-chr8-90876647-2	E2
Merged-chr4-10694558-2	chr4	10694401	10694800	Merged-chr4-10694515-1	E2
Merged-chr15-82968559-2	chr15	82968201	82968800	Merged-chr15-82968618-1	E2
Merged-chr3-27484860-2	chr3	27484601	27485000	Merged-chr3-27484919-1	E7
Merged-chr6-108593477-2	chr6	108593401	108593600	Merged-chr6-108593454-2	E14
Merged-chr19-7268352-2	chr19	7266801	7270200	Merged-chr19-7268203-2	E2
Merged-chr1-75662872-2	chr1	75662801	75663000	Merged-chr1-75662843-1	E3
Merged-chr5-142837087-2	chr5	142837001	142837200	Merged-chr5-142837073-1	E3
Merged-chr7-45628860-2	chr7	45628201	45629400	Merged-chr7-45628920-1	E2
Merged-chrX-11466268-2	chrX	11466201	11466400	Merged-chrX-11466236-2	E5
Merged-chr15-72690045-2	chr15	72689801	72690400	Merged-chr15-72689990-1	E15
Merged-chr1-72960312-2	chr1	72960201	72960400	Merged-chr1-72960323-2	E3
Merged-chr4-141677844-2	chr4	141673801	141679200	Merged-chr4-141679187-1	E14
Merged-chr9-120011411-2	chr9	120011201	120011600	Merged-chr9-120011421-2	E3
Merged-chr5-64626609-2	chr5	64626401	64626800	Merged-chr5-64626618-2	E3
Merged-chr10-21102028-2	chr10	21101001	21102800	Merged-chr10-21102155-2	E13
Merged-chr13-112365909-2	chr13	112365801	112366000	Merged-chr13-112365917-2	E3
Merged-chr10-41553079-2	chr10	41553001	41553200	Merged-chr10-41553058-1	E2
Merged-chr10-7132877-2	chr10	7131401	7133600	Merged-chr10-7133254-2	E10
Merged-chr18-34535822-2	chr18	34535601	34536000	Merged-chr18-34535843-1	E4
Merged-chr2-107060717-2	chr2	107057601	107061800	Merged-chr2-107061734-2	E16
Merged-chr6-127503390-2	chr6	127503201	127503600	Merged-chr6-127503380-1	E4
Merged-chr5-139559122-2	chr5	139558401	139560800	Merged-chr5-139558643-1	E1
Merged-chr9-20831047-2	chr9	20830801	20831200	Merged-chr9-20831094-2	E2
Merged-chr15-12848347-2	chr15	12848001	12848600	Merged-chr15-12848394-2	E8
Merged-chr11-75165990-2	chr11	75165001	75167800	Merged-chr11-75165580-2	E2
Merged-chr13-69667436-2	chr13	69667201	69667600	Merged-chr13-69667472-2	E15
Merged-chr8-3428501-2	chr8	3427601	3429200	Merged-chr8-3428601-1	E9
Merged-chr2-173232839-2	chr2	173232001	173234600	Merged-chr2-173232377-1	E3
Merged-chr1-86300488-2	chr1	86300201	86301200	Merged-chr1-86300275-2	E3
Merged-chr5-145217889-2	chr5	145217601	145218200	Merged-chr5-145217878-2	E12
Merged-chr5-142906020-2	chr5	142905401	142907200	Merged-chr5-142905739-2	E2
Merged-chr2-11502798-2	chr2	11500801	11503600	Merged-chr2-11503396-2	E2
Merged-chr2-126302781-2	chr2	126302201	126303800	Merged-chr2-126302561-1	E15
Merged-chr8-22859602-2	chr8	22859201	22860000	Merged-chr8-22859603-2	E13
Merged-chr2-23999161-2	chr2	23998401	24000200	Merged-chr2-23999021-2	E15
Merged-chr2-167538165-2	chr2	167537601	167539000	Merged-chr2-167538030-2	E2
Merged-chr9-65109595-2	chr9	65109201	65110000	Merged-chr9-65109589-2	E2
Merged-chr11-29693220-2	chr11	29692801	29694000	Merged-chr11-29693040-2	E2
Merged-chr15-82127808-2	chr15	82127201	82128400	Merged-chr15-82127815-2	E2
Merged-chr7-28503742-2	chr7	28497401	28506000	Merged-chr7-28505784-1	E6
Merged-chr4-78212185-2	chr4	78212001	78212400	Merged-chr4-78212170-1	E2
Merged-chr9-54840225-2	chr9	54839801	54840400	Merged-chr9-54840350-2	E13
Merged-chr3-138644407-2	chr3	138644001	138644600	Merged-chr3-138644514-2	E2
Merged-chr10-125906627-2	chr10	125906401	125906800	Merged-chr10-125906653-2	E5
Merged-chr4-131060738-2	chr4	131060201	131061000	Merged-chr4-131060876-2	E4
Merged-chr13-34741814-2	chr13	34741201	34742200	Merged-chr13-34741928-2	E15
Merged-chr15-80822430-2	chr15	80822201	80822600	Merged-chr15-80822459-2	E7
Merged-chr9-89704879-2	chr9	89704401	89705400	Merged-chr9-89704858-2	E2
Merged-chr4-129862527-2	chr4	129862401	129862600	Merged-chr4-129862553-2	E4
Merged-chr11-106674971-2	chr11	106674401	106676000	Merged-chr11-106674742-2	E3
Merged-chr4-139967538-2	chr4	139967201	139967800	Merged-chr4-139967576-2	E2
Merged-chr16-8481926-2	chr16	8481601	8482400	Merged-chr16-8481851-2	E7
Merged-chr1-74106553-2	chr1	74106201	74107200	Merged-chr1-74106406-2	E3
Merged-chr4-124906428-2	chr4	124906001	124907000	Merged-chr4-124906356-2	E2
Merged-chr15-80977919-2	chr15	80977601	80978400	Merged-chr15-80977837-1	E2
Merged-chr1-36244195-2	chr1	36243801	36244400	Merged-chr1-36244290-2	E2
Merged-chr1-60566689-2	chr1	60566201	60567400	Merged-chr1-60566578-2	E2
Merged-chr5-117413768-2	chr5	117413401	117414400	Merged-chr5-117413636-2	E2
Merged-chr1-39335970-2	chr1	39335601	39336200	Merged-chr1-39336040-2	E3
Merged-chr2-106200399-2	chr2	106200201	106200600	Merged-chr2-106200397-1	E15
Merged-chr13-29034658-2	chr13	29034601	29034800	Merged-chr13-29034615-2	E3
Merged-chr19-6979769-2	chr19	6979201	6980800	Merged-chr19-6979537-2	E2
Merged-chr1-191396728-2	chr1	191396001	191398000	Merged-chr1-191396455-1	E2
Merged-chr4-45184862-2	chr4	45184401	45185600	Merged-chr4-45184723-2	E2
Merged-chr17-35866254-2	chr17	35865601	35867800	Merged-chr17-35865808-1	E2
Merged-chr17-70834638-2	chr17	70834401	70834800	Merged-chr17-70834675-1	E2
Merged-chr10-58239175-2	chr10	58238001	58239600	Merged-chr10-58239550-1	E17
Merged-chr16-16912075-2	chr16	16911801	16912400	Merged-chr16-16912050-2	E2
Merged-chr7-29865089-2	chr7	29863001	29866600	Merged-chr7-29865378-2	E10
Merged-chr4-148068464-2	chr4	148068401	148068600	Merged-chr4-148068427-2	E3
Merged-chr3-136670186-2	chr3	136669401	136672000	Merged-chr3-136669672-2	E2
Merged-chr3-93506433-2	chr3	93506201	93506800	Merged-chr3-93506366-1	E2
Merged-chr5-37047371-2	chr5	37046801	37047800	Merged-chr5-37047441-2	E3
Merged-chr6-75288910-2	chr6	75288601	75289400	Merged-chr6-75288820-2	E15
Merged-chr2-152049040-2	chr2	152048001	152049600	Merged-chr2-152049280-2	E2
Merged-chr10-77197697-2	chr10	77196201	77199400	Merged-chr10-77197594-2	E13
Merged-chr4-153806398-2	chr4	153805801	153807000	Merged-chr4-153806396-1	E3
Merged-chr7-68810577-2	chr7	68804001	68813000	Merged-chr7-68812653-2	E16
Merged-chr1-177258122-2	chr1	177258001	177258200	Merged-chr1-177258144-2	E13
Merged-chr17-36271435-2	chr17	36270801	36272000	Merged-chr17-36271469-1	E2
Merged-chr13-70379484-2	chr13	70379401	70379600	Merged-chr13-70379467-2	E5
Merged-chr10-7589957-2	chr10	7589401	7590800	Merged-chr10-7589814-1	E2
Merged-chr9-106212724-2	chr9	106212601	106212800	Merged-chr9-106212747-1	E2
Merged-chr7-80320351-2	chr7	80320001	80320800	Merged-chr7-80320302-1	E2
Merged-chr9-22137335-2	chr9	22137201	22137600	Merged-chr9-22137269-2	E3
Merged-chr7-115580616-2	chr7	115580401	115580800	Merged-chr7-115580632-2	E5
Merged-chr11-100257615-2	chr11	100257401	100258000	Merged-chr11-100257529-1	E3
Merged-chr2-31924612-2	chr2	31922401	31926200	Merged-chr2-31924923-1	E4
Merged-chr6-38730478-2	chr6	38729801	38730800	Merged-chr6-38730656-2	E13
Merged-chr16-93907421-2	chr16	93907201	93907800	Merged-chr16-93907342-1	E2
Merged-chr8-123515470-2	chr8	123515401	123515600	Merged-chr8-123515439-2	E3
Merged-chr13-51975880-2	chr13	51975001	51976400	Merged-chr13-51976059-1	E2
Merged-chr2-126553146-2	chr2	126552801	126553800	Merged-chr2-126552991-2	E2
Merged-chr3-96278111-2	chr3	96277801	96278400	Merged-chr3-96278121-1	E2
Merged-chr15-59291693-2	chr15	59291601	59291800	Merged-chr15-59291685-2	E14
Merged-chr8-16591506-2	chr8	16590801	16592000	Merged-chr8-16591612-2	E15
Merged-chr5-45278364-2	chr5	45277601	45279000	Merged-chr5-45278428-2	E15
Merged-chr5-77309745-2	chr5	77308801	77310800	Merged-chr5-77309689-1	E2
Merged-chr6-39872294-2	chr6	39871401	39873600	Merged-chr6-39872088-1	E2
Merged-chr2-11062321-2	chr2	11062001	11062600	Merged-chr2-11062342-2	E15
Merged-chr16-9291558-2	chr16	9291401	9291800	Merged-chr16-9291515-2	E3
Merged-chr11-117849023-2	chr11	117848401	117849600	Merged-chr11-117849046-2	E2
Merged-chr5-64579946-2	chr5	64579801	64580200	Merged-chr5-64579892-1	E2
Merged-chr9-89671008-2	chr9	89670801	89671200	Merged-chr9-89671016-2	E15
Merged-chr16-90082203-2	chr16	90082001	90082400	Merged-chr16-90082206-2	E7
Merged-chr1-20554583-2	chr1	20554401	20554800	Merged-chr1-20554566-1	E15
Merged-chr11-102957199-2	chr11	102957001	102957600	Merged-chr11-102957097-2	E3
Merged-chr10-85035311-2	chr10	85034801	85035600	Merged-chr10-85035422-2	E3
Merged-chr4-123624607-2	chr4	123624401	123624800	Merged-chr4-123624613-1	E13
Merged-chr11-74876895-2	chr11	74876801	74877000	Merged-chr11-74876890-1	E3
Merged-chr7-79378213-2	chr7	79377401	79379800	Merged-chr7-79377825-2	E6
Merged-chr15-96460570-2	chr15	96460001	96460800	Merged-chr15-96460740-2	E2
Merged-chr2-57238213-2	chr2	57237601	57239000	Merged-chr2-57238125-2	E2
Merged-chr14-20702997-2	chr14	20702601	20703400	Merged-chr14-20702993-1	E2
Merged-chr4-5690429-2	chr4	5689801	5690800	Merged-chr4-5690558-2	E7
Merged-chr9-108049035-2	chr9	108048801	108049200	Merged-chr9-108049070-1	E13
Merged-chr10-121510382-2	chr10	121510201	121510600	Merged-chr10-121510363-2	E2
Merged-chr11-31402472-2	chr11	31398801	31413400	Merged-chr11-31398844-2	E17
Merged-chr7-127777273-2	chr7	127776401	127778200	Merged-chr7-127777246-1	E2
Merged-chr16-16213513-2	chr16	16213201	16213800	Merged-chr16-16213525-2	E2
Merged-chr3-96557872-2	chr3	96557601	96558000	Merged-chr3-96557944-2	E2
Merged-chr10-91070012-2	chr10	91067601	91071400	Merged-chr10-91070523-1	E10
Merged-chr5-4054309-2	chr5	4054201	4054400	Merged-chr5-4054318-1	E7
Merged-chr4-124862155-2	chr4	124861401	124862800	Merged-chr4-124862210-2	E2
Merged-chr1-74713521-2	chr1	74713201	74714200	Merged-chr1-74713341-2	E2
Merged-chr16-33517510-2	chr16	33517201	33518000	Merged-chr16-33517420-2	E2
Merged-chr12-80228415-2	chr12	80227801	80229600	Merged-chr12-80228129-1	E12
Merged-chr1-127236227-2	chr1	127235001	127236800	Merged-chr1-127236554-2	E14
Merged-chr3-41557385-2	chr3	41555601	41559200	Merged-chr3-41557370-1	E12
Merged-chr3-21936212-2	chr3	21935801	21937000	Merged-chr3-21936023-2	E2
Merged-chr11-108101724-2	chr11	108101401	108102000	Merged-chr11-108101748-2	E15
Merged-chr2-114227948-2	chr2	114202601	114237600	Merged-chr2-114235796-2	E17
Merged-chr14-24004646-2	chr14	24003401	24005200	Merged-chr14-24004991-1	E2
Merged-chr10-128035613-2	chr10	128035201	128036200	Merged-chr10-128035526-2	E2
Merged-chr14-118437185-2	chr14	118436801	118438000	Merged-chr14-118436969-2	E2
Merged-chr6-113852531-2	chr6	113852201	113852800	Merged-chr6-113852562-1	E15
Merged-chr17-24351954-2	chr17	24350801	24353000	Merged-chr17-24352008-2	E2
Merged-chr5-135250753-2	chr5	135249801	135251600	Merged-chr5-135250805-1	E2
Merged-chr9-20813571-2	chr9	20813201	20814600	Merged-chr9-20813241-1	E14
Merged-chr17-56673377-2	chr17	56672601	56674000	Merged-chr17-56673454-1	E2
Merged-chr9-114401256-2	chr9	114400801	114402000	Merged-chr9-114401111-2	E2
Merged-chr10-7956622-2	chr10	7956201	7957000	Merged-chr10-7956644-2	E2
Merged-chr11-57912015-2	chr11	57911601	57912200	Merged-chr11-57912129-2	E3
Merged-chr4-45514083-2	chr4	45513601	45514400	Merged-chr4-45514165-2	E13
Merged-chr6-125504661-2	chr6	125503801	125505200	Merged-chr6-125504822-2	E14
Merged-chr15-34837758-2	chr15	34837201	34838800	Merged-chr15-34837516-1	E2
Merged-chr9-41002057-2	chr9	41001801	41002400	Merged-chr9-41002014-2	E5
Merged-chr7-4250687-2	chr7	4248201	4252000	Merged-chr7-4251274-2	E18
Merged-chr6-24348483-2	chr6	24348401	24348600	Merged-chr6-24348465-2	E13
Merged-chr1-132656504-2	chr1	132656401	132656600	Merged-chr1-132656507-1	E3
Merged-chr5-132712938-2	chr5	132712801	132713000	Merged-chr5-132712976-2	E5
Merged-chr13-67724435-2	chr13	67724201	67724600	Merged-chr13-67724469-2	E13
Merged-chr1-91413140-2	chr1	91412001	91413800	Merged-chr1-91413379-2	E2
Merged-chr12-107980440-2	chr12	107979601	107981200	Merged-chr12-107980480-2	E2
Merged-chr7-130835475-2	chr7	130834801	130835800	Merged-chr7-130835649-2	E3
Merged-chr1-38934884-2	chr1	38934801	38935000	Merged-chr1-38934867-2	E15
Merged-chr14-79785592-2	chr14	79785401	79785800	Merged-chr14-79785583-2	E15
Merged-chr4-130283076-2	chr4	130283001	130283200	Merged-chr4-130283052-2	E4
Merged-chr5-134006897-2	chr5	134006801	134007000	Merged-chr5-134006894-1	E3
Merged-chr12-111505082-2	chr12	111505001	111505200	Merged-chr12-111505063-2	E3
Merged-chr2-26459121-2	chr2	26458801	26459600	Merged-chr2-26459041-2	E13
Merged-chr15-84657650-2	chr15	84657601	84657800	Merged-chr15-84657600-2	E14
Merged-chr10-62242491-2	chr10	62242201	62242800	Merged-chr10-62242481-2	E13
Merged-chr15-91078229-2	chr15	91077801	91078600	Merged-chr15-91078258-1	E15
Merged-chr7-97341142-2	chr7	97340801	97341400	Merged-chr7-97341184-2	E13
Merged-chr9-58449822-2	chr9	58449601	58450200	Merged-chr9-58449744-1	E13
Merged-chr6-113038541-2	chr6	113037801	113039000	Merged-chr6-113038681-2	E13
Merged-chr3-69598876-2	chr3	69598201	69599400	Merged-chr3-69598952-2	E2
Merged-chr5-112182829-2	chr5	112182601	112183000	Merged-chr5-112182857-2	E14
Merged-chr19-4510697-2	chr19	4510401	4511400	Merged-chr19-4510494-2	E2
Merged-chr10-58540751-2	chr10	58540201	58541200	Merged-chr10-58540802-2	E14
Merged-chr4-127106463-2	chr4	127096201	127115600	Merged-chr4-127107026-2	E10
Merged-chr2-29493567-2	chr2	29493201	29494000	Merged-chr2-29493534-2	E3
Merged-chr8-111693341-2	chr8	111693201	111693400	Merged-chr8-111693381-2	E14
Merged-chr12-102344513-2	chr12	102343801	102344800	Merged-chr12-102344725-2	E6
Merged-chr6-5325189-2	chr6	5325001	5325400	Merged-chr6-5325177-2	E15
Merged-chr11-99591153-2	chr11	99590801	99591400	Merged-chr11-99591206-2	E5
Merged-chr2-164824171-2	chr2	164823201	164825200	Merged-chr2-164824141-2	E12
Merged-chr4-62286681-2	chr4	62286201	62287000	Merged-chr4-62286761-1	E2
Merged-chr11-100957281-2	chr11	100957001	100957400	Merged-chr11-100957361-2	E13
Merged-chr11-65162413-2	chr11	65161801	65163000	Merged-chr11-65162425-1	E2
Merged-chr17-15990855-2	chr17	15990201	15992400	Merged-chr17-15990410-2	E15
Merged-chr7-100555669-2	chr7	100555201	100556400	Merged-chr7-100555537-2	E13
Merged-chr9-45269295-2	chr9	45269201	45269400	Merged-chr9-45269289-2	E3
Merged-chr13-63279091-2	chr13	63279001	63279200	Merged-chr13-63279081-2	E2
Merged-chr9-101034601-2	chr9	101034401	101035000	Merged-chr9-101034501-2	E2
Merged-chr8-85007777-2	chr8	85007401	85008000	Merged-chr8-85007854-2	E2
Merged-chr12-17652934-2	chr12	17652801	17653200	Merged-chr12-17652867-2	E6
Merged-chr11-28583467-2	chr11	28582801	28584400	Merged-chr11-28583333-2	E2
Merged-chr6-70964199-2	chr6	70963401	70964800	Merged-chr6-70964298-2	E13
Merged-chr11-97671908-2	chr11	97671201	97673800	Merged-chr11-97671315-2	E12
Merged-chr5-93093385-2	chr5	93092001	93094600	Merged-chr5-93093470-2	E2
Merged-chr8-12478217-2	chr8	12477801	12478400	Merged-chr8-12478333-2	E2
Merged-chr10-108162330-2	chr10	108161401	108163000	Merged-chr10-108162460-1	E2
Merged-chr2-152029615-2	chr2	152029201	152030000	Merged-chr2-152029630-1	E2
Merged-chr9-123461997-2	chr9	123461801	123462200	Merged-chr9-123461993-1	E12
Merged-chr7-113711220-2	chr7	113711001	113711800	Merged-chr7-113711039-1	E5
Merged-chr2-32713216-2	chr2	32712001	32714000	Merged-chr2-32713432-2	E2
Merged-chr1-34038731-2	chr1	34038601	34038800	Merged-chr1-34038761-1	E8
Merged-chr18-35857364-2	chr18	35857201	35857600	Merged-chr18-35857327-2	E3
Merged-chr13-40258965-2	chr13	40258801	40259200	Merged-chr13-40258930-2	E15
Merged-chr2-156312235-2	chr2	156311801	156313000	Merged-chr2-156312070-1	E2
Merged-chr13-20188347-2	chr13	20188001	20188600	Merged-chr13-20188394-2	E7
Merged-chr10-89443613-2	chr10	89443201	89444000	Merged-chr10-89443625-2	E2
Merged-chr3-7366612-2	chr3	7366401	7366800	Merged-chr3-7366623-1	E2
Merged-chrX-162025374-2	chrX	162024601	162026000	Merged-chrX-162025447-2	E15
Merged-chr9-64496953-2	chr9	64495201	64497600	Merged-chr9-64497505-2	E6
Merged-chr7-49272679-2	chr7	49272401	49273000	Merged-chr7-49272658-2	E14
Merged-chr1-15017708-2	chr1	15017601	15017800	Merged-chr1-15017715-2	E3
Merged-chr3-90224622-2	chr3	90224401	90225000	Merged-chr3-90224544-1	E3
Merged-chr7-29281907-2	chr7	29281201	29282400	Merged-chr7-29282014-2	E2
Merged-chr12-30430263-2	chr12	30418001	30441400	Merged-chr12-30430825-1	E17
Merged-chr1-36068798-2	chr1	36068001	36069800	Merged-chr1-36068696-1	E2
Merged-chr16-11176266-2	chr16	11175601	11176800	Merged-chr16-11176332-2	E2
Merged-chr9-76565871-2	chr9	76565601	76566200	Merged-chr9-76565841-2	E15
Merged-chr6-38083469-2	chr6	38082801	38084400	Merged-chr6-38083338-1	E14
Merged-chr13-112987753-2	chr13	112986601	112989200	Merged-chr13-112987605-1	E2
Merged-chr17-28207870-2	chr17	28207601	28208400	Merged-chr17-28207740-2	E2
Merged-chr11-3266265-2	chr11	3265801	3266800	Merged-chr11-3266230-2	E2
Merged-chr14-63489378-2	chr14	63488001	63490600	Merged-chr14-63489456-1	E10
Merged-chr12-27140535-2	chr12	27140401	27140800	Merged-chr12-27140470-2	E3
Merged-chr15-55112715-2	chr15	55112401	55113000	Merged-chr15-55112730-1	E2
Merged-chr5-149757304-2	chr5	149757201	149757400	Merged-chr5-149757308-2	E5
Merged-chr1-74601343-2	chr1	74601001	74601800	Merged-chr1-74601286-2	E2
Merged-chr7-25530966-2	chr7	25530801	25531200	Merged-chr7-25530932-2	E15
Merged-chr8-54076339-2	chr8	54075801	54076800	Merged-chr8-54076377-2	E13
Merged-chr2-129413488-2	chr2	129413201	129413600	Merged-chr2-129413576-1	E14
Merged-chr17-15093713-2	chr17	15093601	15093800	Merged-chr17-15093725-2	E5
Merged-chr7-19084414-2	chr7	19083801	19084800	Merged-chr7-19084528-2	E3
Merged-chr16-32608908-2	chr16	32608601	32609400	Merged-chr16-32608816-1	E2
Merged-chr5-115317890-2	chr5	115317801	115318000	Merged-chr5-115317880-1	E14
Merged-chr2-128211875-2	chr2	128211201	128212200	Merged-chr2-128212049-2	E2
Merged-chr19-43441139-2	chr19	43440001	43442000	Merged-chr19-43441277-2	E2
Merged-chr15-78486832-2	chr15	78486601	78487200	Merged-chr15-78486763-2	E4
Merged-chr6-82402707-2	chr6	82401601	82403400	Merged-chr6-82402914-2	E2
Merged-chr5-118516325-2	chr5	118513601	118517400	Merged-chr5-118517150-2	E13
Merged-chr17-46852700-2	chr17	46852601	46852800	Merged-chr17-46852699-1	E12
Merged-chr12-111021213-2	chr12	111020601	111021600	Merged-chr12-111021326-2	E4
Merged-chr11-71513108-2	chr11	71513001	71513200	Merged-chr11-71513115-2	E3
Merged-chr17-28223984-2	chr17	28223401	28224200	Merged-chr17-28224168-2	E2
Merged-chr3-51560412-2	chr3	51559601	51561800	Merged-chr3-51560124-2	E2
Merged-chr4-119141252-2	chr4	119140801	119141800	Merged-chr4-119141203-2	E13
Merged-chr1-180696880-2	chr1	180696401	180697600	Merged-chr1-180696759-2	E2
Merged-chr1-135698466-2	chr1	135698201	135698600	Merged-chr1-135698532-2	E3
Merged-chr11-118043358-2	chr11	118042801	118043600	Merged-chr11-118043515-2	E3
Merged-chr8-118641901-2	chr8	118640001	118643600	Merged-chr8-118642002-1	E17
Merged-chr11-96786334-2	chr11	96786201	96786600	Merged-chr11-96786267-2	E14
Merged-chr3-54679052-2	chr3	54679001	54679200	Merged-chr3-54679004-2	E5
Merged-chr17-34981919-2	chr17	34981601	34982600	Merged-chr17-34981737-2	E2
Merged-chr14-34816910-2	chr14	34816001	34818800	Merged-chr14-34816419-1	E1
Merged-chr11-87853212-2	chr11	87853001	87853400	Merged-chr11-87853223-2	E2
Merged-chr16-67652601-2	chr16	67652001	67653200	Merged-chr16-67652601-2	E15
Merged-chr10-77835911-2	chr10	77835001	77836400	Merged-chr10-77836122-2	E4
Merged-chr9-105309771-2	chr9	105309401	105310200	Merged-chr9-105309742-1	E15
Merged-chr17-24455044-2	chr17	24454601	24455400	Merged-chr17-24455087-1	E2
Merged-chr2-126876270-2	chr2	126875601	126876600	Merged-chr2-126876439-2	E2
Merged-chr17-49890000-2	chr17	49889601	49890200	Merged-chr17-49890099-2	E3
Merged-chr17-46886422-2	chr17	46886201	46886600	Merged-chr17-46886443-1	E13
Merged-chr15-99891055-2	chr15	99891001	99891200	Merged-chr15-99891009-2	E14
Merged-chr15-77793343-2	chr15	77793001	77793800	Merged-chr15-77793286-2	E8
Merged-chr12-39742368-2	chr12	39742201	39742600	Merged-chr12-39742335-1	E3
Merged-chr12-106964012-2	chr12	106963801	106964200	Merged-chr12-106964024-1	E15
Merged-chr4-83486337-2	chr4	83485801	83487000	Merged-chr4-83486273-1	E2
Merged-chr5-36369283-2	chr5	36369001	36369400	Merged-chr5-36369365-2	E3
Merged-chr8-123045269-2	chr8	123045001	123045600	Merged-chr8-123045238-2	E12
Merged-chr2-105263605-2	chr2	105263001	105264600	Merged-chr2-105263410-2	E14
Merged-chr4-154071134-2	chr4	154071001	154071200	Merged-chr4-154071167-1	E14
Merged-chr17-50032181-2	chr17	50032001	50032400	Merged-chr17-50032162-2	E5
Merged-chr2-104122541-2	chr2	104122401	104122600	Merged-chr2-104122582-2	E13
Merged-chr1-37130419-2	chr1	37130201	37131000	Merged-chr1-37130238-1	E14
Merged-chr11-99627872-2	chr11	99627601	99628000	Merged-chr11-99627944-2	E5
Merged-chr9-65632122-2	chr9	65631401	65634200	Merged-chr9-65631444-1	E12
Merged-chr10-81526909-2	chr10	81526601	81527200	Merged-chr10-81526917-2	E3
Merged-chr14-34831215-2	chr14	34830801	34831400	Merged-chr14-34831330-1	E4
Merged-chr9-114753277-2	chr9	114752801	114753600	Merged-chr9-114753353-2	E2
Merged-chr1-20058526-2	chr1	20058401	20058600	Merged-chr1-20058551-2	E5
Merged-chr12-113140599-2	chr12	113139801	113141800	Merged-chr12-113140397-2	E2
Merged-chr15-26784280-2	chr15	26784001	26784600	Merged-chr15-26784260-2	E15
Merged-chr12-35313450-2	chr12	35313201	35313800	Merged-chr12-35313400-2	E15
Merged-chr11-117912827-2	chr11	117912601	117913000	Merged-chr11-117912854-2	E2
Merged-chr11-99897662-2	chr11	99897601	99897800	Merged-chr11-99897624-2	E5
Merged-chr7-28656630-2	chr7	28656401	28656800	Merged-chr7-28656659-2	E14
Merged-chr9-121932609-2	chr9	121932201	121932800	Merged-chr9-121932718-1	E5
Merged-chr12-40917665-2	chr12	40917201	40918200	Merged-chr12-40917630-2	E13
Merged-chr11-95057341-2	chr11	95057001	95058200	Merged-chr11-95057081-2	E2
Merged-chr8-73353531-2	chr8	73352201	73355000	Merged-chr8-73353462-2	E2
Merged-chr10-42679075-2	chr10	42678601	42679600	Merged-chr10-42679050-1	E2
Merged-chr5-128436986-2	chr5	128436801	128437200	Merged-chr5-128436971-2	E3
Merged-chr5-66618468-2	chr5	66617801	66619200	Merged-chr5-66618436-2	E2
Merged-chr16-13976617-2	chr16	13976401	13976800	Merged-chr16-13976633-2	E14
Merged-chr9-17875048-2	chr9	17874801	17875400	Merged-chr9-17874996-1	E15
Merged-chr17-64876322-2	chr17	64876201	64876400	Merged-chr17-64876344-2	E5
Merged-chr6-29632707-2	chr6	29632601	29632800	Merged-chr6-29632714-2	E2
Merged-chr11-77500692-2	chr11	77499601	77501600	Merged-chr11-77500783-2	E8
Merged-chr1-189991274-2	chr1	189991201	189991400	Merged-chr1-189991248-2	E5
Merged-chr15-97784541-2	chr15	97784201	97785200	Merged-chr15-97784381-2	E2
Merged-chr8-124906031-2	chr8	124905201	124907600	Merged-chr8-124905662-2	E9
Merged-chr4-133896558-2	chr4	133896001	133897000	Merged-chr4-133896615-2	E14
Merged-chr10-90904806-2	chr10	90903401	90907200	Merged-chr10-90904311-2	E17
Merged-chr18-5163445-2	chr18	5163001	5163800	Merged-chr18-5163489-2	E2
Merged-chr15-28071265-2	chr15	28069601	28072800	Merged-chr15-28071329-2	E1
Merged-chr7-6999106-2	chr7	6998801	6999400	Merged-chr7-6999111-2	E15
Merged-chr11-107817376-2	chr11	107817201	107817600	Merged-chr11-107817351-1	E5
Merged-chr4-117210899-2	chr4	117210801	117211000	Merged-chr4-117210897-1	E14
Merged-chr18-82477986-2	chr18	82476201	82480800	Merged-chr18-82477471-2	E1
Merged-chr7-19716115-2	chr7	19716001	19716200	Merged-chr7-19716130-2	E2
Merged-chr19-25488839-2	chr19	25487201	25489800	Merged-chr19-25489178-2	E13
Merged-chr5-98167302-2	chr5	98167001	98167600	Merged-chr5-98167303-1	E2
Merged-chr14-24253982-2	chr14	24253201	24254600	Merged-chr14-24254063-2	E13
Merged-chr18-31910911-2	chr18	31910401	31911400	Merged-chr18-31910922-1	E2
Merged-chr8-127006597-2	chr8	127006201	127007200	Merged-chr8-127006493-2	E5
Merged-chr6-8485521-2	chr6	8485401	8485600	Merged-chr6-8485541-1	E5
Merged-chr15-81745176-2	chr15	81744801	81746200	Merged-chr15-81744852-1	E2
Merged-chr17-56194873-2	chr17	56194201	56195400	Merged-chr17-56194945-1	E8
Merged-chr2-126870920-2	chr2	126866001	126874600	Merged-chr2-126871540-2	E11
Merged-chr5-150426737-2	chr5	150426601	150426800	Merged-chr5-150426773-2	E5
Merged-chr6-5819869-2	chr6	5819801	5820000	Merged-chr6-5819838-2	E5
Merged-chr12-25475614-2	chr12	25475401	25475800	Merged-chr12-25475628-2	E3
Merged-chr7-99468830-2	chr7	99468001	99469400	Merged-chr7-99468960-2	E2
Merged-chr11-116853499-2	chr11	116852401	116854000	Merged-chr11-116853798-1	E2
Merged-chr14-32096268-2	chr14	32094601	32098800	Merged-chr14-32095835-2	E9
Merged-chr10-59894952-2	chr10	59894001	59895800	Merged-chr10-59895004-2	E8
Merged-chr18-20553344-2	chr18	20553201	20553600	Merged-chr18-20553287-1	E5
Merged-chr7-141339154-2	chr7	141338601	141340600	Merged-chr7-141338708-2	E2
Merged-chr7-128080287-2	chr7	128080001	128080800	Merged-chr7-128080174-2	E13
Merged-chr1-34902725-2	chr1	34902601	34903000	Merged-chr1-34902649-2	E15
Merged-chr17-29094255-2	chr17	29093601	29095800	Merged-chr17-29093810-1	E2
Merged-chr18-65565833-2	chr18	65565601	65566000	Merged-chr18-65565866-1	E2
Merged-chr17-35704277-2	chr17	35703801	35705200	Merged-chr17-35704053-2	E2
Merged-chr18-82953039-2	chr18	82952801	82953200	Merged-chr18-82953078-2	E4
Merged-chr5-100037937-2	chr5	100036401	100038600	Merged-chr5-100038373-2	E12
Merged-chr13-11959677-2	chr13	11959201	11960200	Merged-chr13-11959654-2	E5
Merged-chr13-46727720-2	chr13	46727201	46728200	Merged-chr13-46727739-1	E2
Merged-chr15-82170875-2	chr15	82169801	82171400	Merged-chr15-82171149-1	E8
Merged-chr2-135887640-2	chr2	135886001	135888600	Merged-chr2-135887979-2	E17
Merged-chr19-42795434-2	chr19	42795201	42795600	Merged-chr19-42795467-1	E2
Merged-chr3-135691473-2	chr3	135690601	135692000	Merged-chr3-135691646-1	E2
Merged-chr2-30693697-2	chr2	30693401	30694200	Merged-chr2-30693594-1	E2
Merged-chr18-65497738-2	chr18	65497401	65498000	Merged-chr18-65497775-2	E2
Merged-chr17-30378543-2	chr17	30377801	30379400	Merged-chr17-30378486-2	E14
Merged-chr6-127768763-2	chr6	127766601	127769800	Merged-chr6-127769326-2	E2
Merged-chr11-93968142-2	chr11	93967601	93968400	Merged-chr11-93968284-2	E2
Merged-chr9-31439268-2	chr9	31438801	31440200	Merged-chr9-31439036-2	E13
Merged-chr2-166194291-2	chr2	166194201	166194400	Merged-chr2-166194282-1	E2
Merged-chr12-72761044-2	chr12	72760401	72761400	Merged-chr12-72761187-1	E2
Merged-chr11-116012736-2	chr11	116012201	116013200	Merged-chr11-116012771-1	E2
Merged-chr11-118140952-2	chr11	118140801	118141400	Merged-chr11-118140803-2	E13
Merged-chr5-43948211-2	chr5	43948001	43948400	Merged-chr5-43948222-1	E2
Merged-chr3-33143015-2	chr3	33142401	33143600	Merged-chr3-33143030-2	E2
Merged-chr4-133121014-2	chr4	133120801	133121200	Merged-chr4-133121028-2	E2
Merged-chr11-20145587-2	chr11	20144401	20146800	Merged-chr11-20145573-2	E13
Merged-chr10-77690949-2	chr10	77690401	77692200	Merged-chr10-77690597-1	E4
Merged-chr2-167423631-2	chr2	167422401	167425400	Merged-chr2-167423361-1	E12
Merged-chr18-11892866-2	chr18	11891401	11895200	Merged-chr18-11892431-2	E6
Merged-chr9-118818712-2	chr9	118818601	118819000	Merged-chr9-118818623-2	E15
Merged-chr11-99846955-2	chr11	99846801	99847200	Merged-chr11-99846909-2	E5
Merged-chr7-16476468-2	chr7	16475201	16477000	Merged-chr7-16476835-1	E2
Merged-chr2-165470451-2	chr2	165470201	165470800	Merged-chr2-165470402-2	E4
Merged-chr5-122799876-2	chr5	122798801	122800600	Merged-chr5-122800051-2	E8
Merged-chr3-129544313-2	chr3	129543801	129544600	Merged-chr3-129544425-2	E12
Merged-chr11-117522121-2	chr11	117522001	117522400	Merged-chr11-117522042-1	E3
Merged-chr1-91536608-2	chr1	91536201	91537200	Merged-chr1-91536515-1	E13
Merged-chr5-122295421-2	chr5	122294801	122296000	Merged-chr5-122295442-1	E12
Merged-chr14-31830321-2	chr14	31829801	31831400	Merged-chr14-31830041-2	E2
Merged-chr5-122394078-2	chr5	122392801	122395400	Merged-chr5-122394055-2	E11
Merged-chr1-74809357-2	chr1	74808601	74810400	Merged-chr1-74809214-1	E1
Merged-chr2-31239438-2	chr2	31239201	31239800	Merged-chr2-31239376-2	E2
Merged-chr4-155834074-2	chr4	155834001	155834200	Merged-chr4-155834048-1	E3
Merged-chr19-38060347-2	chr19	38060201	38060600	Merged-chr19-38060294-2	E12
Merged-chr4-151325758-2	chr4	151325601	151326000	Merged-chr4-151325715-2	E4
Merged-chr18-73225091-2	chr18	73224801	73225400	Merged-chr18-73225081-2	E15
Merged-chr1-74857415-2	chr1	74856801	74858200	Merged-chr1-74857330-1	E1
Merged-chr17-27329789-2	chr17	27329201	27330000	Merged-chr17-27329978-2	E3
Merged-chr10-96309064-2	chr10	96307801	96310000	Merged-chr10-96309227-1	E14
Merged-chr1-74332766-2	chr1	74332401	74333200	Merged-chr1-74332731-1	E2
Merged-chr4-43795674-2	chr4	43794601	43796200	Merged-chr4-43795948-2	E14
Merged-chr2-128818364-2	chr2	128818001	128818800	Merged-chr2-128818327-1	E2
Merged-chr12-80758638-2	chr12	80757201	80760800	Merged-chr12-80758275-1	E2
Merged-chr2-153593475-2	chr2	153593201	153593600	Merged-chr2-153593549-1	E2
Merged-chr1-78310704-2	chr1	78310001	78311400	Merged-chr1-78310708-2	E2
Merged-chr6-91843355-2	chr6	91843001	91844000	Merged-chr6-91843209-1	E2
Merged-chr13-51849022-2	chr13	51848801	51849600	Merged-chr13-51848843-2	E13
Merged-chr17-29416165-2	chr17	29416001	29416600	Merged-chr17-29416030-2	E2
Merged-chr9-114569266-2	chr9	114569201	114569400	Merged-chr9-114569231-2	E14
Merged-chr3-121530452-2	chr3	121529801	121530800	Merged-chr3-121530603-1	E14
Merged-chr2-25185994-2	chr2	25185401	25186600	Merged-chr2-25185987-1	E2
Merged-chr16-23983731-2	chr16	23983401	23984600	Merged-chr16-23983461-2	E1
Merged-chr6-116107762-2	chr6	116107401	116108000	Merged-chr6-116107823-2	E2
Merged-chr10-70060216-2	chr10	70060001	70060400	Merged-chr10-70060231-2	E3
Merged-chr15-89374001-2	chr15	89373401	89374600	Merged-chr15-89374001-1	E2
Merged-chr5-140389130-2	chr5	140388601	140389600	Merged-chr5-140389159-1	E2
Merged-chr14-26669331-2	chr14	26668401	26670200	Merged-chr14-26669362-1	E2
Merged-chr1-91414328-2	chr1	91414001	91414800	Merged-chr1-91414255-2	E2
Merged-chr9-64667485-2	chr9	64666201	64668200	Merged-chr9-64667769-1	E7
Merged-chr7-100607697-2	chr7	100607201	100608600	Merged-chr7-100607494-1	E2
Merged-chr1-171126087-2	chr1	171126001	171126200	Merged-chr1-171126073-2	E3
Merged-chr3-108036020-2	chr3	108035801	108036200	Merged-chr3-108036039-2	E5
Merged-chr8-125794932-2	chr8	125794601	125795600	Merged-chr8-125794763-2	E4
Merged-chr19-4169763-2	chr19	4169601	4170200	Merged-chr19-4169625-2	E2
Merged-chr11-51936369-2	chr11	51936201	51936800	Merged-chr11-51936238-1	E4
Merged-chr15-73748625-2	chr15	73747801	73750200	Merged-chr15-73748250-2	E2
Merged-chr5-31241018-2	chr5	31240601	31241600	Merged-chr5-31240936-1	E2
Merged-chr15-98288799-2	chr15	98288401	98289200	Merged-chr15-98288797-2	E4
Merged-chr7-81475240-2	chr7	81473401	81476400	Merged-chr7-81475579-2	E6
Merged-chr13-49187647-2	chr13	49187001	49188800	Merged-chr13-49187394-2	E2
Merged-chr3-9520185-2	chr3	9519801	9520400	Merged-chr3-9520269-2	E13
Merged-chr11-77766616-2	chr11	77766201	77767000	Merged-chr11-77766632-2	E2
Merged-chr15-103340946-2	chr15	103340801	103341000	Merged-chr15-103340992-1	E13
Merged-chr7-43777988-2	chr7	43777801	43778200	Merged-chr7-43777976-2	E6
Merged-chr10-128705250-2	chr10	128705201	128705400	Merged-chr10-128705200-2	E13
Merged-chr14-61603521-2	chr14	61603201	61604400	Merged-chr14-61603242-1	E12
Merged-chr16-91818597-2	chr16	91818401	91818800	Merged-chr16-91818593-2	E2
Merged-chr7-139364161-2	chr7	139363801	139364400	Merged-chr7-139364222-1	E2
Merged-chr13-6675119-2	chr13	6675001	6675200	Merged-chr13-6675137-1	E3
Merged-chr18-36415811-2	chr18	36415401	36416200	Merged-chr18-36415821-2	E13
Merged-chr7-37467046-2	chr7	37466401	37467600	Merged-chr7-37467092-2	E3
Merged-chr9-122006833-2	chr9	122006601	122007200	Merged-chr9-122006766-1	E5
Merged-chr4-138690585-2	chr4	138690201	138690800	Merged-chr4-138690669-2	E3
Merged-chr5-140857639-2	chr5	140857401	140858200	Merged-chr5-140857477-2	E14
Merged-chr17-33718830-2	chr17	33718601	33719400	Merged-chr17-33718659-1	E13
Merged-chr2-179976963-2	chr2	179976401	179977400	Merged-chr2-179977025-1	E2
Merged-chr17-4996215-2	chr17	4995001	4996800	Merged-chr17-4996530-2	E2
Merged-chr13-60602192-2	chr13	60601801	60602800	Merged-chr13-60602083-2	E2
Merged-chr2-158556499-2	chr2	158556401	158556600	Merged-chr2-158556497-2	E14
Merged-chr13-23739149-2	chr13	23738801	23740000	Merged-chr13-23738898-2	E2
Merged-chr5-125532429-2	chr5	125531401	125533400	Merged-chr5-125532458-1	E2
Merged-chr8-70181886-2	chr8	70181201	70182200	Merged-chr8-70182071-1	E3
Merged-chr11-46041276-2	chr11	46040801	46041600	Merged-chr11-46041351-2	E14
Merged-chr13-23554956-2	chr13	23554201	23555400	Merged-chr13-23555112-1	E13
Merged-chr17-29081417-2	chr17	29081201	29081600	Merged-chr17-29081434-2	E2
Merged-chr10-42170639-2	chr10	42170201	42171800	Merged-chr10-42170277-1	E14
Merged-chr13-31293384-2	chr13	31293001	31293800	Merged-chr13-31293368-2	E3
Merged-chr7-143401669-2	chr7	143401601	143401800	Merged-chr7-143401637-2	E4
Merged-chr14-66282510-2	chr14	66281401	66283000	Merged-chr14-66282819-2	E14
Merged-chr1-92365700-2	chr1	92364601	92366800	Merged-chr1-92365699-2	E5
Merged-chr2-30942982-2	chr2	30942801	30943200	Merged-chr2-30942963-1	E14
Merged-chr5-142962209-2	chr5	142961801	142962800	Merged-chr5-142962117-1	E2
Merged-chr10-4712628-2	chr10	4712001	4713000	Merged-chr10-4712756-1	E2
Merged-chr11-70540181-2	chr11	70539801	70540800	Merged-chr11-70540061-2	E2
Merged-chr3-97658428-2	chr3	97657801	97659200	Merged-chr3-97658356-1	E2
Merged-chr17-29855011-2	chr17	29854401	29855400	Merged-chr17-29855122-2	E14
Merged-chr11-117439133-2	chr11	117439001	117439400	Merged-chr11-117439065-2	E3
Merged-chr3-101163503-2	chr3	101162401	101164400	Merged-chr3-101163605-2	E13
Merged-chr3-103461085-2	chr3	103460201	103462000	Merged-chr3-103461070-2	E6
Merged-chr8-70869026-2	chr8	70868001	70870200	Merged-chr8-70868952-2	E2
Merged-chr2-128396249-2	chr2	128395601	128397200	Merged-chr2-128396098-2	E6
Merged-chr14-118696074-2	chr14	118696001	118696200	Merged-chr14-118696047-2	E2
Merged-chr13-51919078-2	chr13	51918801	51919400	Merged-chr13-51919055-2	E3
Merged-chr16-31948419-2	chr16	31948001	31949000	Merged-chr16-31948338-2	E2
Merged-chr11-117475170-2	chr11	117475001	117475400	Merged-chr11-117475139-2	E4
Merged-chr9-62827656-2	chr9	62827601	62827800	Merged-chr9-62827611-2	E2
Merged-chr1-166155058-2	chr1	166154401	166155400	Merged-chr1-166155216-1	E2
Merged-chr17-88440894-2	chr17	88440201	88441800	Merged-chr17-88440787-2	E2
Merged-chr7-29162955-2	chr7	29162801	29163200	Merged-chr7-29162910-2	E3
Merged-chr3-96328709-2	chr3	96328401	96329600	Merged-chr3-96328417-1	E13
Merged-chr5-34909143-2	chr5	34908401	34910400	Merged-chr5-34908886-2	E7
Merged-chr11-32000391-2	chr11	32000201	32000600	Merged-chr11-32000381-2	E3
Merged-chr2-154657142-2	chr2	154656801	154657600	Merged-chr2-154657083-2	E2
Merged-chr7-126777121-2	chr7	126776601	126778000	Merged-chr7-126776941-2	E2
Merged-chr1-36512562-2	chr1	36511601	36513200	Merged-chr1-36512724-2	E2
Merged-chr15-36609040-2	chr15	36608801	36609200	Merged-chr15-36609080-1	E13
Merged-chr4-142219335-2	chr4	142219001	142219800	Merged-chr4-142219270-1	E3
Merged-chr9-59578341-2	chr9	59577801	59578800	Merged-chr9-59578382-1	E2
Merged-chr15-73507876-2	chr15	73506201	73511600	Merged-chr15-73506852-2	E6
Merged-chr6-47943211-2	chr6	47942801	47943800	Merged-chr6-47943121-2	E2
Merged-chr1-59423066-2	chr1	59422801	59423400	Merged-chr1-59423031-2	E2
Merged-chr2-59612238-2	chr2	59611401	59613400	Merged-chr2-59612075-2	E2
Merged-chr7-110062003-2	chr7	110061801	110062200	Merged-chr7-110062005-1	E2
Merged-chr19-58690847-2	chr19	58683001	58697600	Merged-chr19-58691393-2	E16
Merged-chr3-45375944-2	chr3	45375801	45376000	Merged-chr3-45375987-2	E3
Merged-chr17-35835891-2	chr17	35835201	35836800	Merged-chr17-35835781-1	E12
Merged-chr2-25797717-2	chr2	25797601	25797800	Merged-chr2-25797733-2	E5
Merged-chr15-83038136-2	chr15	83038001	83038200	Merged-chr15-83038172-2	E2
Merged-chr1-74424128-2	chr1	74423801	74424400	Merged-chr1-74424155-2	E4
Merged-chr9-118821457-2	chr9	118821201	118821800	Merged-chr9-118821413-1	E14
Merged-chr5-36359981-2	chr5	36359401	36361000	Merged-chr5-36359761-1	E3
Merged-chr5-31265028-2	chr5	31264001	31265600	Merged-chr5-31265255-1	E9
Merged-chr7-24950972-2	chr7	24949001	24954000	Merged-chr7-24950443-2	E1
Merged-chr11-5855632-2	chr11	5855401	5855800	Merged-chr11-5855664-2	E14
Merged-chr12-28817818-2	chr12	28817401	28818800	Merged-chr12-28817535-2	E14
Merged-chr7-128058585-2	chr7	128057801	128059000	Merged-chr7-128058770-2	E4
Merged-chr7-142212274-2	chr7	142212201	142212400	Merged-chr7-142212248-2	E4
Merged-chr7-78766492-2	chr7	78766201	78766600	Merged-chr7-78766584-2	E5
Merged-chr19-10362685-2	chr19	10362201	10363600	Merged-chr19-10362470-2	E4
Merged-chr6-100438693-2	chr6	100438201	100439000	Merged-chr6-100438785-1	E2
Merged-chr2-180472339-2	chr2	180472201	180472400	Merged-chr2-180472378-2	E3
Merged-chr11-102156158-2	chr11	102155601	102156400	Merged-chr11-102156315-2	E2
Merged-chr7-81327153-2	chr7	81327001	81327400	Merged-chr7-81327105-2	E3
Merged-chr11-102209552-2	chr11	102207801	102210600	Merged-chr11-102209903-2	E4
Merged-chr4-124802588-2	chr4	124802001	124803200	Merged-chr4-124802575-2	E2
Merged-chr11-120065341-2	chr11	120064801	120065600	Merged-chr11-120065481-2	E3
Merged-chr4-117317749-2	chr4	117317001	117318200	Merged-chr4-117317897-2	E2
Merged-chr4-120230365-2	chr4	120229801	120230600	Merged-chr4-120230529-1	E5
Merged-chr2-156721345-2	chr2	156720401	156722600	Merged-chr2-156721189-1	E2
Merged-chr1-125390116-2	chr1	125389201	125390600	Merged-chr1-125390331-2	E17
Merged-chr8-71375919-2	chr8	71375401	71376600	Merged-chr8-71375837-2	E2
Merged-chr12-111275152-2	chr12	111274201	111276200	Merged-chr12-111275103-1	E2
Merged-chr1-74125369-2	chr1	74125201	74125600	Merged-chr1-74125337-2	E3
Merged-chr7-127676925-2	chr7	127675801	127677400	Merged-chr7-127677250-1	E14
Merged-chr9-57765170-2	chr9	57764201	57766400	Merged-chr9-57765040-1	E2
Merged-chr3-84040083-2	chr3	84039001	84040800	Merged-chr3-84040265-1	E2
Merged-chr11-19829915-2	chr11	19829801	19830200	Merged-chr11-19829830-2	E13
Merged-chr2-151967410-2	chr2	151967201	151967600	Merged-chr2-151967419-1	E3
Merged-chr17-23790582-2	chr17	23790401	23790800	Merged-chr17-23790564-2	E2
Merged-chr4-11053914-2	chr4	11053801	11054000	Merged-chr4-11053928-2	E14
Merged-chr5-123315401-2	chr5	123315201	123315600	Merged-chr5-123315402-1	E3
Merged-chr7-25100071-2	chr7	25099601	25100400	Merged-chr7-25100142-1	E3
Merged-chr11-5499403-2	chr11	5499001	5499600	Merged-chr11-5499506-2	E13
Merged-chr13-111808544-2	chr13	111807801	111808800	Merged-chr13-111808788-1	E2
Merged-chr4-133660396-2	chr4	133660001	133660800	Merged-chr4-133660392-2	E2
Merged-chr4-133440410-2	chr4	133439801	133440800	Merged-chr4-133440520-2	E3
Merged-chr19-53676750-2	chr19	53676201	53677800	Merged-chr19-53676499-2	E2
Merged-chr19-10072114-2	chr19	10072001	10072200	Merged-chr19-10072127-2	E8
Merged-chr7-4822446-2	chr7	4821201	4823800	Merged-chr7-4822392-1	E13
Merged-chr13-89739629-2	chr13	89739401	89740200	Merged-chr13-89739457-1	E2
Merged-chr8-3395331-2	chr8	3394801	3395800	Merged-chr8-3395362-2	E13
Merged-chr13-50907137-2	chr13	50907001	50907200	Merged-chr13-50907174-2	E15
Merged-chr11-99634828-2	chr11	99634601	99635000	Merged-chr11-99634856-2	E5
Merged-chr12-69476919-2	chr12	69476601	69477200	Merged-chr12-69476938-2	E2
Merged-chr8-20330038-2	chr8	20329601	20330200	Merged-chr8-20330176-2	E5
Merged-chr15-82275136-2	chr15	82274601	82276000	Merged-chr15-82274971-2	E2
Merged-chr2-152816525-2	chr2	152816401	152816800	Merged-chr2-152816450-2	E3
Merged-chr10-61009357-2	chr10	61009201	61009600	Merged-chr10-61009314-2	E4
Merged-chr7-112743904-2	chr7	112743801	112744000	Merged-chr7-112743907-1	E2
Merged-chr1-191269068-2	chr1	191269001	191269200	Merged-chr1-191269036-2	E6
Merged-chr7-45162307-2	chr7	45162001	45162600	Merged-chr7-45162313-2	E2
Merged-chr17-23599068-2	chr17	23598601	23599600	Merged-chr17-23599036-2	E2
Merged-chr6-90852595-2	chr6	90852401	90852800	Merged-chr6-90852589-1	E15
Merged-chr16-30070155-2	chr16	30069801	30071200	Merged-chr16-30069810-2	E2
Merged-chr15-99531341-2	chr15	99531001	99531800	Merged-chr15-99531282-1	E3
Merged-chr17-83324167-2	chr17	83324001	83324400	Merged-chr17-83324133-2	E3
Merged-chr9-69290113-2	chr9	69289201	69291400	Merged-chr9-69289925-2	E2
Merged-chr8-107425006-2	chr8	107424601	107425200	Merged-chr8-107425111-1	E2
Merged-chr12-54326676-2	chr12	54326401	54326800	Merged-chr12-54326751-2	E5
Merged-chr19-36945549-2	chr19	36944001	36947800	Merged-chr19-36945197-1	E9
Merged-chr2-112379359-2	chr2	112379001	112379600	Merged-chr2-112379418-2	E2
Merged-chr1-153705178-2	chr1	153705001	153705400	Merged-chr1-153705156-2	E3
Merged-chr2-30363938-2	chr2	30363601	30364200	Merged-chr2-30363976-2	E13
Merged-chr12-110882425-2	chr12	110881801	110882800	Merged-chr12-110882549-1	E8
Merged-chr1-193036157-2	chr1	193036001	193036400	Merged-chr1-193036113-1	E3
Merged-chr14-56572086-2	chr14	56572001	56572200	Merged-chr14-56572072-2	E13
Merged-chr15-97342656-2	chr15	97342601	97342800	Merged-chr15-97342611-2	E14
Merged-chr6-142937642-2	chr6	142936801	142938000	Merged-chr6-142937883-1	E7
Merged-chr5-14048839-2	chr5	14048601	14049000	Merged-chr5-14048877-1	E15
Merged-chr19-36398590-2	chr19	36398401	36398800	Merged-chr19-36398580-2	E5
Merged-chr11-117930971-2	chr11	117930601	117931400	Merged-chr11-117930941-2	E2
Merged-chr12-111136184-2	chr12	111135801	111136600	Merged-chr12-111136168-2	E4
Merged-chr15-36793175-2	chr15	36792401	36794600	Merged-chr15-36792850-2	E2
Merged-chr9-102262444-2	chr9	102257801	102267400	Merged-chr9-102262288-2	E1
Merged-chr4-142065037-2	chr4	142064801	142065200	Merged-chr4-142065073-2	E2
Merged-chr11-88974212-2	chr11	88973801	88974800	Merged-chr11-88974124-1	E2
Merged-chr8-116608144-2	chr8	116608001	116608400	Merged-chr8-116608087-2	E3
Merged-chr4-154299954-2	chr4	154299401	154300400	Merged-chr4-154300008-2	E2
Merged-chr5-144842685-2	chr5	144842401	144843000	Merged-chr5-144842669-2	E8
Merged-chr10-61366047-2	chr10	61365801	61366200	Merged-chr10-61366094-2	E8
Merged-chr9-57163402-2	chr9	57163201	57163600	Merged-chr9-57163403-1	E14
Merged-chr5-65467090-2	chr5	65466201	65468000	Merged-chr5-65467080-1	E10
Merged-chr1-59697914-2	chr1	59697801	59698000	Merged-chr1-59697927-2	E11
Merged-chr5-110372219-2	chr5	110372001	110372400	Merged-chr5-110372237-2	E7
Merged-chr13-56671473-2	chr13	56671401	56671600	Merged-chr13-56671446-2	E3
Merged-chr9-75232226-2	chr9	75231801	75232600	Merged-chr9-75232251-1	E2
Merged-chr2-166219153-2	chr2	166219001	166219600	Merged-chr2-166219006-1	E3
Merged-chr9-94669943-2	chr9	94667001	94671800	Merged-chr9-94670486-2	E1
Merged-chr11-69804229-2	chr11	69803401	69805400	Merged-chr11-69804058-1	E2
Merged-chr4-117189794-2	chr4	117189201	117190000	Merged-chr4-117189987-1	E13
Merged-chr16-22407117-2	chr16	22400801	22415400	Merged-chr16-22406133-2	E12
Merged-chr1-74855386-2	chr1	74854801	74856800	Merged-chr1-74854972-2	E2
Merged-chr8-46471215-2	chr8	46471001	46471800	Merged-chr8-46471030-1	E2
Merged-chr6-60364008-2	chr6	60363801	60364400	Merged-chr6-60363916-2	E15
Merged-chr10-81417110-2	chr10	81416801	81417400	Merged-chr10-81417119-2	E2
Merged-chr12-72070474-2	chr12	72069601	72071400	Merged-chr12-72070448-2	E2
Merged-chr3-100925271-2	chr3	100925001	100925400	Merged-chr3-100925341-2	E3
Merged-chr9-120759995-2	chr9	120759801	120760200	Merged-chr9-120759989-1	E3
Merged-chr11-96956238-2	chr11	96955801	96956600	Merged-chr11-96956276-1	E2
Merged-chr9-51815839-2	chr9	51815601	51816000	Merged-chr9-51815878-2	E5
Merged-chr14-121542024-2	chr14	121538601	121543400	Merged-chr14-121543047-2	E17
Merged-chr12-4593188-2	chr12	4592601	4593800	Merged-chr12-4593175-1	E2
Merged-chr11-102206737-2	chr11	102206401	102207200	Merged-chr11-102206674-1	E2
Merged-chr17-23969058-2	chr17	23969001	23969200	Merged-chr17-23969016-2	E14
Merged-chr7-66840320-2	chr7	66839801	66840800	Merged-chr7-66840339-1	E2
Merged-chr5-124611063-2	chr5	124610801	124611200	Merged-chr5-124611126-2	E13
Merged-chr1-84989120-2	chr1	84986401	84992400	Merged-chr1-84988839-1	E16
Merged-chr8-70718453-2	chr8	70718201	70718600	Merged-chr8-70718506-1	E3
Merged-chr13-51078457-2	chr13	51075201	51081400	Merged-chr13-51078614-1	E18
Merged-chr12-64902677-2	chr12	64902401	64902800	Merged-chr12-64902753-2	E5
Merged-chr13-108214536-2	chr13	108214001	108215400	Merged-chr13-108214372-1	E2
Merged-chr6-100319548-2	chr6	100315601	100321000	Merged-chr6-100320796-2	E6
Merged-chr7-145034365-2	chr7	145033601	145034800	Merged-chr7-145034529-2	E14
Merged-chr9-65544507-2	chr9	65542201	65545800	Merged-chr9-65545014-2	E6
Merged-chr7-25214216-2	chr7	25213601	25214600	Merged-chr7-25214331-1	E7
Merged-chr7-141447636-2	chr7	141447201	141448000	Merged-chr7-141447672-2	E2
Merged-chr6-124741406-2	chr6	124741201	124742000	Merged-chr6-124741212-1	E13
Merged-chr17-23610509-2	chr17	23609601	23611000	Merged-chr17-23610718-2	E2
Merged-chr15-71554503-2	chr15	71554201	71554800	Merged-chr15-71554505-2	E15
Merged-chr11-114502633-2	chr11	114501801	114503000	Merged-chr11-114502865-1	E3
Merged-chr1-9545805-2	chr1	9545401	9546400	Merged-chr1-9545710-2	E2
Merged-chr17-7906800-2	chr17	7906601	7907000	Merged-chr17-7906799-2	E15
Merged-chr9-102690431-2	chr9	102689801	102691400	Merged-chr9-102690261-2	E2
Merged-chr13-55199681-2	chr13	55199401	55199800	Merged-chr13-55199761-1	E13
Merged-chr2-154466881-2	chr2	154464601	154470600	Merged-chr2-154466161-2	E11
Merged-chr5-137630265-2	chr5	137629601	137630800	Merged-chr5-137630330-2	E12
Merged-chr17-23722359-2	chr17	23720601	23723000	Merged-chr17-23722918-2	E4
Merged-chr6-85451472-2	chr6	85450801	85452600	Merged-chr6-85451244-2	E2
Merged-chr4-149731104-2	chr4	149731001	149731400	Merged-chr4-149731007-1	E2
Merged-chr18-75607456-2	chr18	75607001	75608200	Merged-chr18-75607311-2	E3
Merged-chr4-132977797-2	chr4	132977601	132978000	Merged-chr4-132977793-1	E3
Merged-chr9-25795402-2	chr9	25794401	25795800	Merged-chr9-25795704-2	E17
Merged-chr17-6827978-2	chr17	6827401	6828600	Merged-chr17-6827956-2	E2
Merged-chr3-75165067-2	chr3	75165001	75165200	Merged-chr3-75165033-1	E13
Merged-chr8-4205840-2	chr8	4205401	4207000	Merged-chr8-4205480-2	E2
Merged-chr5-142129341-2	chr5	142129201	142129400	Merged-chr5-142129382-1	E14
Merged-chr5-114333056-2	chr5	114332401	114333800	Merged-chr5-114333012-2	E4
Merged-chr1-59516252-2	chr1	59516001	59516400	Merged-chr1-59516304-2	E2
Merged-chr4-155276981-2	chr4	155276801	155277200	Merged-chr4-155276961-1	E7
Merged-chr10-44730961-2	chr10	44730801	44731200	Merged-chr10-44730921-2	E15
Merged-chr14-54464325-2	chr14	54464001	54464800	Merged-chr14-54464249-1	E2
Merged-chr5-114166122-2	chr5	114165001	114166600	Merged-chr5-114166444-2	E4
Merged-chr4-155670453-2	chr4	155669601	155671400	Merged-chr4-155670406-1	E13
Merged-chr11-74897150-2	chr11	74896201	74898400	Merged-chr11-74896999-1	E2
Merged-chr15-79774916-2	chr15	79774601	79775800	Merged-chr15-79774632-2	E13
Merged-chr15-78928084-2	chr15	78927801	78928200	Merged-chr15-78928167-2	E2
Merged-chr16-62922051-2	chr16	62921601	62922600	Merged-chr16-62922002-1	E15
Merged-chr10-94514990-2	chr10	94514201	94515800	Merged-chr10-94514979-1	E2
Merged-chr2-25400833-2	chr2	25400401	25401000	Merged-chr2-25400966-1	E2
Merged-chr8-111360415-2	chr8	111360001	111360800	Merged-chr8-111360430-2	E14
Merged-chr1-93194868-2	chr1	93194601	93195600	Merged-chr1-93194635-2	E14
Merged-chrX-103759458-2	chrX	103741401	103769800	Merged-chrX-103763315-2	E16
Merged-chr9-121299518-2	chr9	121299401	121299600	Merged-chr9-121299536-1	E2
Merged-chr4-154466567-2	chr4	154464601	154468800	Merged-chr4-154466434-1	E6
Merged-chr12-73089753-2	chr12	73089001	73091800	Merged-chr12-73089106-2	E14
Merged-chr8-120528540-2	chr8	120528201	120529000	Merged-chr8-120528479-2	E2
Merged-chr2-170633265-2	chr2	170633001	170633400	Merged-chr2-170633330-1	E4
Merged-chr8-19784894-2	chr8	19784601	19785200	Merged-chr8-19784887-1	E2
Merged-chr6-144644865-2	chr6	144644601	144645200	Merged-chr6-144644829-1	E15
Merged-chr2-152294011-2	chr2	152293601	152294400	Merged-chr2-152294022-2	E2
Merged-chr9-110205961-2	chr9	110205401	110206200	Merged-chr9-110206121-2	E8
Merged-chr16-14557277-2	chr16	14556801	14557600	Merged-chr16-14557354-1	E15
Merged-chr11-87427236-2	chr11	87426801	87428400	Merged-chr11-87426871-1	E14
Merged-chr5-137720920-2	chr5	137720801	137721000	Merged-chr5-137720939-2	E3
Merged-chr4-140957898-2	chr4	140957601	140958000	Merged-chr4-140957996-1	E2
Merged-chr13-51631562-2	chr13	51631401	51631800	Merged-chr13-51631523-2	E13
Merged-chr6-60828873-2	chr6	60828401	60829400	Merged-chr6-60828846-1	E2
Merged-chr16-11254104-2	chr16	11253201	11254800	Merged-chr16-11254207-2	E2
Merged-chr12-12788597-2	chr12	12787801	12789000	Merged-chr12-12788794-2	E2
Merged-chr8-120114298-2	chr8	120113601	120115000	Merged-chr8-120114295-2	E2
Merged-chr9-69471101-2	chr9	69470801	69471400	Merged-chr9-69471101-2	E14
Merged-chr11-3451961-2	chr11	3451601	3452600	Merged-chr11-3451821-1	E2
Merged-chr13-12340909-2	chr13	12340801	12341000	Merged-chr13-12340918-1	E3
Merged-chr4-8647545-2	chr4	8647001	8648600	Merged-chr4-8647290-2	E2
Merged-chr4-142384083-2	chr4	142383201	142386200	Merged-chr4-142383466-2	E17
Merged-chr9-57244638-2	chr9	57244401	57244800	Merged-chr9-57244675-1	E14
Merged-chr2-94406279-2	chr2	94406001	94406800	Merged-chr2-94406158-1	E2
Merged-chr16-93908023-2	chr16	93907801	93908400	Merged-chr16-93907945-1	E13
Merged-chr8-121897130-2	chr8	121896001	121897600	Merged-chr8-121897459-2	E8
Merged-chr19-29655507-2	chr19	29655201	29656200	Merged-chr19-29655313-2	E14
Merged-chr2-102117472-2	chr2	102117001	102117800	Merged-chr2-102117543-2	E13
Merged-chr19-5224709-2	chr19	5224201	5225000	Merged-chr19-5224818-2	E14
Merged-chr2-76338812-2	chr2	76338401	76339200	Merged-chr2-76338824-1	E2
Merged-chr2-44927430-2	chr2	44926601	44927800	Merged-chr2-44927659-2	E2
Merged-chr13-110048916-2	chr13	110048801	110049000	Merged-chr13-110048931-1	E5
Merged-chr18-63907653-2	chr18	63907601	63907800	Merged-chr18-63907606-2	E15
Merged-chr7-19877284-2	chr7	19877201	19877400	Merged-chr7-19877267-1	E3
Merged-chr9-120732632-2	chr9	120732001	120733000	Merged-chr9-120732764-2	E2
Merged-chr10-78244699-2	chr10	78244001	78245200	Merged-chr10-78244797-2	E2
Merged-chr15-98776484-2	chr15	98776201	98777000	Merged-chr15-98776367-2	E2
Merged-chr4-145194312-2	chr4	145194001	145195000	Merged-chr4-145194124-2	E2
Merged-chr5-120338343-2	chr5	120338201	120338600	Merged-chr5-120338285-2	E3
Merged-chr9-96324819-2	chr9	96324401	96325000	Merged-chr9-96324938-2	E3
Merged-chr2-102110462-2	chr2	102110401	102110600	Merged-chr2-102110423-2	E3
Merged-chr3-153128008-2	chr3	153127801	153128200	Merged-chr3-153128015-1	E5
Merged-chr5-117842095-2	chr5	117841801	117842600	Merged-chr5-117841989-2	E2
Merged-chr12-86801442-2	chr12	86800801	86802400	Merged-chr12-86801283-1	E2
Merged-chr5-123934528-2	chr5	123934401	123934600	Merged-chr5-123934555-1	E13
Merged-chr1-182489901-2	chr1	182489801	182490000	Merged-chr1-182489902-2	E3
Merged-chr1-190448365-2	chr1	190448001	190448600	Merged-chr1-190448430-2	E3
Merged-chr3-146852405-2	chr3	146852001	146852800	Merged-chr3-146852409-1	E2
Merged-chr5-34327280-2	chr5	34326801	34327600	Merged-chr5-34327360-1	E2
Merged-chr1-70725777-2	chr1	70725601	70726000	Merged-chr1-70725754-1	E5
Merged-chr14-5928808-2	chr14	5928001	5930400	Merged-chr14-5928415-1	E17
Merged-chr1-52080158-2	chr1	52079801	52081000	Merged-chr1-52079915-2	E15
Merged-chr10-28801096-2	chr10	28801001	28801200	Merged-chr10-28801092-2	E5
Merged-chr5-122311979-2	chr5	122311801	122312400	Merged-chr5-122311858-2	E8
Merged-chr17-79714324-2	chr17	79713001	79716200	Merged-chr17-79714047-1	E2
Merged-chr2-49817536-2	chr2	49817401	49817800	Merged-chr2-49817472-2	E14
Merged-chr18-83543748-2	chr18	83542201	83545000	Merged-chr18-83543896-1	E17
Merged-chr7-35447628-2	chr7	35447401	35448000	Merged-chr7-35447555-2	E13
Merged-chr10-84383369-2	chr10	84383001	84383800	Merged-chr10-84383338-2	E3
Merged-chr5-28261999-2	chr5	28261201	28262400	Merged-chr5-28262197-2	E4
Merged-chr5-140208870-2	chr5	140208801	140209000	Merged-chr5-140208840-1	E3
Merged-chr4-136751169-2	chr4	136750801	136751800	Merged-chr4-136751037-1	E3
Merged-chr12-91684162-2	chr12	91683201	91684600	Merged-chr12-91684424-2	E12
Merged-chr12-112164417-2	chr12	112163001	112165400	Merged-chr12-112164634-2	E3
Merged-chr11-82882873-2	chr11	82882601	82883200	Merged-chr11-82882846-2	E8
Merged-chr5-30869841-2	chr5	30869401	30870200	Merged-chr5-30869881-2	E2
Merged-chr3-129918600-2	chr3	129918401	129918800	Merged-chr3-129918600-2	E5
Merged-chr2-32174458-2	chr2	32174001	32174800	Merged-chr2-32174515-2	E2
Merged-chr13-111687185-2	chr13	111685601	111687800	Merged-chr13-111687669-1	E2
Merged-chr4-155163540-2	chr4	155163201	155164000	Merged-chr4-155163480-1	E2
Merged-chr3-8702999-2	chr3	8702601	8703200	Merged-chr3-8703098-2	E4
Merged-chr5-142886607-2	chr5	142885601	142887000	Merged-chr5-142886914-2	E2
Merged-chr16-58670525-2	chr16	58670001	58671000	Merged-chr16-58670549-1	E2
Merged-chr2-30928347-2	chr2	30928201	30928400	Merged-chr2-30928394-2	E14
Merged-chr1-156939629-2	chr1	156938601	156940200	Merged-chr1-156939857-1	E2
Merged-chr13-12889800-2	chr13	12889601	12890000	Merged-chr13-12889800-1	E3
Merged-chr8-31121709-2	chr8	31121401	31122400	Merged-chr8-31121517-2	E14
Merged-chr3-88336342-2	chr3	88335801	88336800	Merged-chr3-88336383-2	E2
Merged-chr9-21798528-2	chr9	21797401	21799000	Merged-chr9-21798856-2	E2
Merged-chr2-19716019-2	chr2	19715601	19716200	Merged-chr2-19716137-2	E15
Merged-chr10-43992215-2	chr10	43991601	43992600	Merged-chr10-43992330-2	E6
Merged-chr11-69073317-2	chr11	69072401	69073800	Merged-chr11-69073533-1	E13
Merged-chr17-24707629-2	chr17	24707401	24707800	Merged-chr17-24707657-1	E2
Merged-chr17-29627199-2	chr17	29626601	29627800	Merged-chr17-29627197-2	E8
Merged-chr11-117404079-2	chr11	117403801	117404600	Merged-chr11-117403957-1	E3
Merged-chr13-93499449-2	chr13	93498201	93500200	Merged-chr13-93499697-1	E2
Merged-chr11-74925903-2	chr11	74925401	74926400	Merged-chr11-74925905-1	E2
Merged-chr4-139615022-2	chr4	139614801	139615200	Merged-chr4-139615044-2	E2
Merged-chr10-8287488-2	chr10	8287201	8287800	Merged-chr10-8287475-2	E3
Merged-chr6-33248945-2	chr6	33248201	33249200	Merged-chr6-33249190-2	E13
Merged-chr17-12195141-2	chr17	12194401	12195400	Merged-chr17-12195381-1	E13
Merged-chr8-71952098-2	chr8	71951401	71953000	Merged-chr8-71951996-2	E12
Merged-chr1-153677752-2	chr1	153677201	153678200	Merged-chr1-153677804-2	E14
Merged-chr3-94960458-2	chr3	94960201	94960600	Merged-chr3-94960516-2	E13
Merged-chr10-25708113-2	chr10	25707801	25708400	Merged-chr10-25708125-2	E13
Merged-chr10-127066170-2	chr10	127066001	127066400	Merged-chr10-127066140-1	E8
Merged-chr4-141571467-2	chr4	141571001	141571800	Merged-chr4-141571534-2	E2
Merged-chr7-117616432-2	chr7	117616201	117616600	Merged-chr7-117616463-1	E15
Merged-chr10-39967657-2	chr10	39967401	39967800	Merged-chr10-39967713-1	E15
Merged-chr14-6932823-2	chr14	6932601	6933000	Merged-chr14-6932846-2	E5
Merged-chr7-29506570-2	chr7	29506201	29507200	Merged-chr7-29506439-2	E14
Merged-chr9-74366194-2	chr9	74366001	74366400	Merged-chr9-74366187-2	E5
Merged-chr7-111075145-2	chr7	111073001	111079400	Merged-chr7-111074089-1	E9
Merged-chr10-29147078-2	chr10	29146601	29147800	Merged-chr10-29146955-1	E2
Merged-chr11-117319819-2	chr11	117319401	117320000	Merged-chr11-117319937-1	E13
Merged-chr2-103302936-2	chr2	103302601	103303200	Merged-chr2-103302972-2	E15
Merged-chr7-92670178-2	chr7	92669601	92670400	Merged-chr7-92670356-2	E2
Merged-chr15-83432851-2	chr15	83432401	83433400	Merged-chr15-83432801-1	E13
Merged-chr4-116819704-2	chr4	116819601	116820000	Merged-chr4-116819608-2	E11
Merged-chr4-150136786-2	chr4	150136201	150137200	Merged-chr4-150136872-2	E3
Merged-chr2-18955228-2	chr2	18955001	18955400	Merged-chr2-18955256-2	E5
Merged-chr3-96666048-2	chr3	96664201	96667400	Merged-chr3-96666295-2	E6
Merged-chr7-126857372-2	chr7	126857201	126857600	Merged-chr7-126857343-1	E2
Merged-chr13-66715407-2	chr13	66715001	66715800	Merged-chr13-66715414-1	E13
Merged-chr9-70817551-2	chr9	70817401	70817800	Merged-chr9-70817501-1	E3
Merged-chr11-118349708-2	chr11	118349401	118350200	Merged-chr11-118349616-2	E14
Merged-chr1-132417631-2	chr1	132417201	132418200	Merged-chr1-132417561-2	E2
Merged-chr5-135149640-2	chr5	135148801	135150200	Merged-chr5-135149779-1	E2
Merged-chr11-106788478-2	chr11	106787401	106789600	Merged-chr11-106788456-1	E2
Merged-chr8-87571045-2	chr8	87570801	87571200	Merged-chr8-87571089-2	E13
Merged-chr2-163889561-2	chr2	163889401	163889800	Merged-chr2-163889521-1	E4
Merged-chr15-80076978-2	chr15	80076601	80077800	Merged-chr15-80076756-1	E9
Merged-chr8-70629882-2	chr8	70629401	70630600	Merged-chr8-70629764-2	E2
Merged-chr9-59679277-2	chr9	59679001	59679800	Merged-chr9-59679153-1	E8
Merged-chr15-31294514-2	chr15	31294401	31294600	Merged-chr15-31294527-2	E3
Merged-chr11-103138712-2	chr11	103138201	103139000	Merged-chr11-103138823-1	E2
Merged-chr16-3117829-2	chr16	3115801	3122800	Merged-chr16-3116358-1	E16
Merged-chr11-61410147-2	chr11	61409201	61410800	Merged-chr11-61410293-2	E6
Merged-chr11-59640456-2	chr11	59640401	59640600	Merged-chr11-59640411-2	E4
Merged-chr11-5130863-2	chr11	5130201	5132200	Merged-chr11-5130526-2	E3
Merged-chr5-142876839-2	chr5	142874401	142877800	Merged-chr5-142877577-1	E8
Merged-chr11-19851481-2	chr11	19851401	19851600	Merged-chr11-19851461-2	E14
Merged-chr11-75572597-2	chr11	75572201	75573400	Merged-chr11-75572394-2	E3
Merged-chr17-28061719-2	chr17	28061401	28062000	Merged-chr17-28061738-1	E3
Merged-chr6-83853670-2	chr6	83852401	83855200	Merged-chr6-83853540-1	E6
Merged-chr11-94989775-2	chr11	94989401	94990000	Merged-chr11-94989850-2	E2
Merged-chr10-75560080-2	chr10	75559401	75560800	Merged-chr10-75560059-2	E2
Merged-chr4-130775560-2	chr4	130775001	130776200	Merged-chr4-130775520-1	E8
Merged-chr6-5482601-2	chr6	5482401	5482800	Merged-chr6-5482601-2	E14
Merged-chr10-85526735-2	chr10	85526401	85527000	Merged-chr10-85526769-2	E2
Merged-chr4-94752650-2	chr4	94752401	94752800	Merged-chr4-94752700-1	E3
Merged-chr11-3119181-2	chr11	3113201	3122800	Merged-chr11-3120362-2	E17
Merged-chr17-85645931-2	chr17	85645601	85646400	Merged-chr17-85645862-2	E2
Merged-chr2-153071952-2	chr2	153071401	153072400	Merged-chr2-153072003-2	E2
Merged-chr6-119418080-2	chr6	119417401	119419600	Merged-chr6-119417659-1	E13
Merged-chr7-113193054-2	chr7	113192801	113193600	Merged-chr7-113192907-2	E14
Merged-chr6-113075973-2	chr6	113075801	113076200	Merged-chr6-113075945-2	E13
Merged-chr1-54485154-2	chr1	54484801	54485600	Merged-chr1-54485107-2	E14
Merged-chr2-167605132-2	chr2	167604001	167605800	Merged-chr2-167605364-1	E4
Merged-chr3-148989336-2	chr3	148987001	148990600	Merged-chr3-148989871-2	E2
Merged-chr11-115441623-2	chr11	115441401	115441800	Merged-chr11-115441645-2	E2
Merged-chr2-165900614-2	chr2	165900401	165901200	Merged-chr2-165900428-2	E2
Merged-chr13-55504555-2	chr13	55504401	55504800	Merged-chr13-55504509-2	E8
Merged-chr16-22239276-2	chr16	22239001	22239800	Merged-chr16-22239151-2	E7
Merged-chr14-122255673-2	chr14	122255601	122255800	Merged-chr14-122255645-2	E2
Merged-chr9-61293310-2	chr9	61293201	61293400	Merged-chr9-61293319-2	E2
Merged-chr5-31602526-2	chr5	31602001	31603000	Merged-chr5-31602551-2	E13
Merged-chr16-15637776-2	chr16	15637001	15638200	Merged-chr16-15637951-2	E2
Merged-chr11-69459848-2	chr11	69459401	69460000	Merged-chr11-69459996-2	E6
Merged-chr16-20837157-2	chr16	20836801	20837600	Merged-chr16-20837114-2	E13
Merged-chr8-40511732-2	chr8	40510801	40512400	Merged-chr8-40511864-1	E2
Merged-chr4-44984677-2	chr4	44984401	44985400	Merged-chr4-44984454-1	E2
Merged-chr6-47454602-2	chr6	47453601	47455400	Merged-chr6-47454704-1	E2
Merged-chr18-24132985-2	chr18	24132601	24133200	Merged-chr18-24133070-2	E6
Merged-chr6-125592372-2	chr6	125592001	125593000	Merged-chr6-125592243-2	E13
Merged-chr4-140440186-2	chr4	140440001	140440600	Merged-chr4-140440072-1	E4
Merged-chr11-82901806-2	chr11	82900801	82902200	Merged-chr11-82902111-2	E8
Merged-chr4-124850467-2	chr4	124849601	124851600	Merged-chr4-124850333-1	E2
Merged-chr4-155136163-2	chr4	155136001	155136600	Merged-chr4-155136025-1	E3
Merged-chr1-176974694-2	chr1	176973001	176975600	Merged-chr1-176975087-2	E17
Merged-chr11-49588799-2	chr11	49588601	49589000	Merged-chr11-49588798-2	E15
Merged-chr18-35815484-2	chr18	35814801	35815800	Merged-chr18-35815667-2	E2
Merged-chr8-111258963-2	chr8	111258401	111259600	Merged-chr8-111258925-1	E2
Merged-chr2-31528546-2	chr2	31528001	31529400	Merged-chr2-31528392-1	E3
Merged-chr3-28220069-2	chr3	28219601	28220400	Merged-chr3-28220138-2	E5
Merged-chr14-66836144-2	chr14	66836001	66836400	Merged-chr14-66836088-2	E4
Merged-chr4-137685020-2	chr4	137684801	137685200	Merged-chr4-137685039-1	E14
Merged-chr13-50916560-2	chr13	50907201	50933200	Merged-chr13-50912920-2	E16
Merged-chr4-137771574-2	chr4	137771201	137772200	Merged-chr4-137771447-2	E3
Merged-chr8-13337647-2	chr8	13337401	13338200	Merged-chr8-13337493-2	E13
Merged-chr10-83056420-2	chr10	83056201	83056600	Merged-chr10-83056439-1	E3
Merged-chr12-85192911-2	chr12	85192401	85193200	Merged-chr12-85193022-2	E2
Merged-chr7-122021001-2	chr7	122020601	122021200	Merged-chr7-122021102-2	E2
Merged-chr13-3642203-2	chr13	3642001	3642400	Merged-chr13-3642206-2	E3
Merged-chr2-14176525-2	chr2	14168001	14183600	Merged-chr2-14177250-2	E16
Merged-chr11-52479891-2	chr11	52479601	52480600	Merged-chr11-52479682-2	E6
Merged-chr14-48475770-2	chr14	48475401	48476200	Merged-chr14-48475740-2	E15
Merged-chr19-47491910-2	chr19	47491801	47492000	Merged-chr19-47491920-2	E3
Merged-chr9-37657317-2	chr9	37656801	37657600	Merged-chr9-37657433-1	E2
Merged-chr17-15372267-2	chr17	15371601	15373400	Merged-chr17-15372034-2	E1
Merged-chr2-3423929-2	chr2	3423801	3424000	Merged-chr2-3423957-2	E13
Merged-chr5-98256032-2	chr5	98255601	98256200	Merged-chr5-98256163-2	E2
Merged-chr16-3872485-2	chr16	3872001	3872800	Merged-chr16-3872569-2	E2
Merged-chr13-84348130-2	chr13	84347601	84348400	Merged-chr13-84348260-2	E13
Merged-chr4-140049451-2	chr4	140049401	140049600	Merged-chr4-140049401-2	E4
Merged-chr19-57314815-2	chr19	57314401	57315200	Merged-chr19-57314830-2	E2
Merged-chr1-127677634-2	chr1	127676601	127678400	Merged-chr1-127677767-1	E2
Merged-chr1-161099833-2	chr1	161095801	161109200	Merged-chr1-161097165-1	E10
Merged-chr4-137791589-2	chr4	137791401	137791800	Merged-chr4-137791577-1	E2
Merged-chr10-91123681-2	chr10	91123401	91124000	Merged-chr10-91123661-2	E2
Merged-chr11-5741179-2	chr11	5740601	5741400	Merged-chr11-5741358-2	E2
Merged-chr3-97875058-2	chr3	97875001	97875200	Merged-chr3-97875015-2	E14
Merged-chr8-111452217-2	chr8	111452001	111452600	Merged-chr8-111452134-2	E7
Merged-chr4-138883886-2	chr4	138883801	138884000	Merged-chr4-138883871-2	E4
Merged-chr3-86224089-2	chr3	86223601	86225400	Merged-chr3-86223677-2	E2
Merged-chr15-103155943-2	chr15	103155801	103156200	Merged-chr15-103155886-1	E2
Merged-chr2-33438749-2	chr2	33438001	33439800	Merged-chr2-33438598-2	E13
Merged-chr7-6770376-2	chr7	6770201	6770600	Merged-chr7-6770351-2	E3
Merged-chr9-120679735-2	chr9	120679001	120680000	Merged-chr9-120679970-1	E13
Merged-chr13-34746947-2	chr13	34746601	34747600	Merged-chr13-34746794-2	E2
Merged-chr8-69121628-2	chr8	69121401	69122000	Merged-chr8-69121556-2	E2
Merged-chr13-49020404-2	chr13	49020201	49020600	Merged-chr13-49020408-2	E3
Merged-chr7-141475788-2	chr7	141475001	141477200	Merged-chr7-141475476-1	E2
Merged-chr17-45567182-2	chr17	45566201	45567800	Merged-chr17-45567364-2	E8
Merged-chr17-27041165-2	chr17	27039801	27041800	Merged-chr17-27041529-2	E2
Merged-chr11-117832377-2	chr11	117832201	117832800	Merged-chr11-117832254-2	E2
Merged-chr1-85244843-2	chr1	85244401	85245200	Merged-chr1-85244886-1	E14
Merged-chr9-58521498-2	chr9	58521401	58521600	Merged-chr9-58521496-2	E14
Merged-chr14-62423325-2	chr14	62417201	62425400	Merged-chr14-62425350-2	E17
Merged-chr1-180890038-2	chr1	180889201	180890800	Merged-chr1-180890076-2	E13
Merged-chr6-88981737-2	chr6	88981601	88981800	Merged-chr6-88981773-2	E3
Merged-chr4-140197460-2	chr4	140197401	140197600	Merged-chr4-140197420-2	E14
Merged-chr17-52601372-2	chr17	52600801	52601800	Merged-chr17-52601444-2	E2
Merged-chr15-98145406-2	chr15	98145001	98146000	Merged-chr15-98145311-1	E2
Merged-chr12-111261047-2	chr12	111260401	111262200	Merged-chr12-111260793-2	E8
Merged-chr11-16591985-2	chr11	16591401	16593200	Merged-chr11-16591669-2	E13
Merged-chr12-51166447-2	chr12	51165401	51168000	Merged-chr12-51166193-2	E17
Merged-chr11-78751474-2	chr11	78751001	78751800	Merged-chr11-78751547-2	E2
Merged-chr3-144720421-2	chr3	144720201	144721000	Merged-chr3-144720241-1	E13
Merged-chr15-76013481-2	chr15	76012001	76016000	Merged-chr15-76012961-2	E3
Merged-chr1-192834772-2	chr1	192833601	192835800	Merged-chr1-192834843-2	E2
Merged-chr6-30121724-2	chr6	30121601	30121800	Merged-chr6-30121747-2	E7
Merged-chr7-44485358-2	chr7	44485201	44485800	Merged-chr7-44485216-2	E14
Merged-chr8-60035674-2	chr8	60035401	60036200	Merged-chr8-60035548-1	E15
Merged-chr19-45560208-2	chr19	45560001	45560400	Merged-chr19-45560215-2	E2
Merged-chr1-36061602-2	chr1	36061201	36062400	Merged-chr1-36061404-2	E13
Merged-chr6-89059791-2	chr6	89059601	89060000	Merged-chr6-89059781-2	E3
Merged-chr17-72603303-2	chr17	72603201	72603400	Merged-chr17-72603306-1	E3
Merged-chr13-95535115-2	chr13	95534401	95535400	Merged-chr13-95535330-2	E13
Merged-chr2-25319042-2	chr2	25318601	25319400	Merged-chr2-25319084-2	E2
Merged-chr1-89998889-2	chr1	89998801	89999000	Merged-chr1-89998878-2	E4
Merged-chr9-58061138-2	chr9	58060801	58061600	Merged-chr9-58061075-1	E3
Merged-chr7-130236780-2	chr7	130235601	130237400	Merged-chr7-130237060-2	E15
Merged-chr8-70533387-2	chr8	70532801	70534000	Merged-chr8-70533374-2	E9
Merged-chr11-114650853-2	chr11	114650801	114651000	Merged-chr11-114650805-2	E4
Merged-chr6-102737345-2	chr6	102737001	102737600	Merged-chr6-102737390-2	E15
Merged-chr11-98849387-2	chr11	98849001	98849600	Merged-chr11-98849473-2	E2
Merged-chr13-96660210-2	chr13	96660001	96660400	Merged-chr13-96660220-2	E8
Merged-chr10-76442714-2	chr10	76442401	76443400	Merged-chr10-76442527-1	E2
Merged-chr18-74064853-2	chr18	74063601	74065600	Merged-chr18-74065106-1	E2
Merged-chr5-109876801-2	chr5	109875001	109880600	Merged-chr5-109875801-2	E16
Merged-chr3-35474521-2	chr3	35474401	35474600	Merged-chr3-35474542-1	E3
Merged-chr10-81564847-2	chr10	81564201	81565200	Merged-chr10-81564993-1	E2
Merged-chr1-189883101-2	chr1	189882801	189883400	Merged-chr1-189883101-1	E3
Merged-chr19-10198872-2	chr19	10197801	10199800	Merged-chr19-10198943-2	E9
Merged-chr3-3364106-2	chr3	3363801	3364400	Merged-chr3-3364112-1	E15
Merged-chr1-182191262-2	chr1	182189801	182192400	Merged-chr1-182191423-2	E14
Merged-chr8-125271583-2	chr8	125271201	125272000	Merged-chr8-125271565-1	E4
Merged-chr15-79905160-2	chr15	79901801	79907800	Merged-chr15-79905519-2	E12
Merged-chr10-60305540-2	chr10	60304801	60306400	Merged-chr10-60305480-2	E3
Merged-chr13-56630765-2	chr13	56630601	56631000	Merged-chr13-56630730-2	E4
Merged-chr15-78437055-2	chr15	78436401	78437800	Merged-chr15-78437010-2	E2
Merged-chr12-51829635-2	chr12	51828801	51830200	Merged-chr12-51829770-2	E2
Merged-chr13-32802443-2	chr13	32802001	32803200	Merged-chr13-32802285-1	E2
Merged-chr1-4802765-2	chr1	4802601	4803000	Merged-chr1-4802730-2	E14
Merged-chr13-35741836-2	chr13	35741601	35742400	Merged-chr13-35741671-2	E2
Merged-chr1-171502967-2	chr1	171502401	171503200	Merged-chr1-171503134-1	E14
Merged-chr11-118376901-2	chr11	118375801	118378600	Merged-chr11-118376601-2	E6
Merged-chr4-104349468-2	chr4	104337801	104355800	Merged-chr4-104352136-2	E17
Merged-chr4-142205292-2	chr4	142204401	142206200	Merged-chr4-142205283-2	E14
Merged-chr5-25654852-2	chr5	25654601	25655000	Merged-chr5-25654903-2	E2
Merged-chr12-80858539-2	chr12	80858401	80858800	Merged-chr12-80858477-1	E7
Merged-chr1-190168109-2	chr1	190166801	190168600	Merged-chr1-190168517-2	E1
Merged-chr1-178335817-2	chr1	178332801	178337000	Merged-chr1-178336733-2	E12
Merged-chr7-75914152-2	chr7	75913801	75914400	Merged-chr7-75914203-2	E15
Merged-chr1-191435652-2	chr1	191435401	191436000	Merged-chr1-191435603-1	E3
Merged-chr11-51967825-2	chr11	51967401	51968200	Merged-chr11-51967850-1	E2
Merged-chr11-101131918-2	chr11	101130801	101133000	Merged-chr11-101131936-2	E6
Merged-chr12-111696293-2	chr12	111696001	111696400	Merged-chr12-111696385-2	E3
Merged-chr17-73053299-2	chr17	73046001	73058400	Merged-chr17-73054398-1	E17
Merged-chr6-39131776-2	chr6	39131601	39132000	Merged-chr6-39131752-2	E13
Merged-chr7-81335892-2	chr7	81335801	81336000	Merged-chr7-81335884-2	E13
Merged-chr2-155729289-2	chr2	155728801	155729600	Merged-chr2-155729378-2	E2
Merged-chr4-129890295-2	chr4	129890201	129890400	Merged-chr4-129890290-1	E5
Merged-chr5-100751754-2	chr5	100751401	100752000	Merged-chr5-100751808-1	E4
Merged-chr14-61648780-2	chr14	61648001	61649400	Merged-chr14-61648860-1	E2
Merged-chr8-36104478-2	chr8	36104201	36105000	Merged-chr8-36104356-2	E1
Merged-chr9-46980353-2	chr9	46980201	46980600	Merged-chr9-46980305-2	E15
Merged-chr11-97151277-2	chr11	97150001	97151800	Merged-chr11-97151653-2	E2
Merged-chr4-140406463-2	chr4	140406401	140406600	Merged-chr4-140406426-1	E2
Merged-chr5-135001278-2	chr5	135000601	135001600	Merged-chr5-135001456-2	E2
Merged-chr6-85232151-2	chr6	85231401	85232800	Merged-chr6-85232201-2	E3
Merged-chr10-45000266-2	chr10	45000201	45000400	Merged-chr10-45000231-2	E3
Merged-chr11-75206509-2	chr11	75206201	75206800	Merged-chr11-75206517-2	E4
Merged-chr19-47222832-2	chr19	47222201	47223600	Merged-chr19-47222764-2	E3
Merged-chr18-65925227-2	chr18	65924601	65925800	Merged-chr18-65925254-2	E13
Merged-chr16-35981664-2	chr16	35981401	35981800	Merged-chr16-35981728-1	E2
Merged-chr18-34552481-2	chr18	34549601	34556400	Merged-chr18-34551962-2	E1
Merged-chr2-91183412-2	chr2	91183201	91183800	Merged-chr2-91183324-2	E13
Merged-chr11-95305232-2	chr11	95303601	95305800	Merged-chr11-95305763-2	E11
Merged-chr16-33062439-2	chr16	33062201	33063000	Merged-chr16-33062278-1	E2
Merged-chr11-62873512-2	chr11	62873201	62873800	Merged-chr11-62873524-1	E5
Merged-chr4-153567943-2	chr4	153567801	153568200	Merged-chr4-153567885-2	E4
Merged-chr2-132946361-2	chr2	132946001	132947200	Merged-chr2-132946121-2	E1
Merged-chr13-72818068-2	chr13	72817801	72818600	Merged-chr13-72817935-2	E3
Merged-chr18-31568930-2	chr18	31568801	31569000	Merged-chr18-31568959-1	E14
Merged-chr10-5922217-2	chr10	5921001	5923000	Merged-chr10-5922434-1	E2
Merged-chr2-125134365-2	chr2	125134001	125134600	Merged-chr2-125134429-1	E15
Merged-chr17-28594120-2	chr17	28594001	28594200	Merged-chr17-28594139-2	E11
Merged-chr1-181256825-2	chr1	181256401	181257800	Merged-chr1-181256550-2	E2
Merged-chr15-79375042-2	chr15	79374201	79375400	Merged-chr15-79375283-1	E8
Merged-chr2-113327804-2	chr2	113327401	113328200	Merged-chr2-113327807-1	E2
Merged-chr10-110854630-2	chr10	110853801	110855000	Merged-chr10-110854860-2	E14
Merged-chr1-182908600-2	chr1	182908401	182908800	Merged-chr1-182908600-1	E3
Merged-chr8-84998207-2	chr8	84997801	84998600	Merged-chr8-84998214-2	E2
Merged-chr11-51606126-2	chr11	51604601	51606800	Merged-chr11-51606551-1	E12
Merged-chr18-22649573-2	chr18	22649401	22649800	Merged-chr18-22649546-2	E15
Merged-chr17-55954428-2	chr17	55954201	55954600	Merged-chr17-55954456-1	E2
Merged-chr17-70851430-2	chr17	70850601	70851800	Merged-chr17-70851660-1	E2
Merged-chr5-28092631-2	chr5	28089801	28094000	Merged-chr5-28093362-2	E17
Merged-chr14-73385159-2	chr14	73384801	73385400	Merged-chr14-73385218-1	E2
Merged-chr12-21431083-2	chr12	21430801	21431200	Merged-chr12-21431165-2	E13
Merged-chr10-40465390-2	chr10	40465201	40465600	Merged-chr10-40465379-2	E3
Merged-chr3-88715617-2	chr3	88714001	88716600	Merged-chr3-88715934-1	E10
Merged-chr6-85187348-2	chr6	85185801	85188600	Merged-chr6-85187495-2	E2
Merged-chr6-147091665-2	chr6	147090601	147092600	Merged-chr6-147091729-2	E2
Merged-chr10-88708689-2	chr10	88707801	88709000	Merged-chr10-88708978-1	E14
Merged-chr2-121771896-2	chr2	121769401	121776600	Merged-chr2-121770792-1	E17
Merged-chr5-31610502-2	chr5	31610401	31610600	Merged-chr5-31610504-2	E2
Merged-chr5-123572783-2	chr5	123572401	123573000	Merged-chr5-123572865-2	E2
Merged-chr1-64299225-2	chr1	64299001	64299400	Merged-chr1-64299250-2	E15
Merged-chr7-43775918-2	chr7	43775801	43776000	Merged-chr7-43775935-2	E3
Merged-chrX-12840345-2	chrX	12839201	12841400	Merged-chrX-12840390-2	E13
Merged-chr5-37246373-2	chr5	37245401	37247000	Merged-chr5-37246546-1	E2
Merged-chr5-115726665-2	chr5	115726201	115727000	Merged-chr5-115726730-2	E14
Merged-chr11-100472526-2	chr11	100472001	100472800	Merged-chr11-100472651-2	E2
Merged-chr10-36507230-2	chr10	36506201	36508200	Merged-chr10-36507260-1	E2
Merged-chr8-121921614-2	chr8	121921401	121921800	Merged-chr8-121921627-1	E3
Merged-chr3-139010529-2	chr3	139006401	139022800	Merged-chr3-139006458-2	E10
Merged-chr4-140283607-2	chr4	140283401	140283800	Merged-chr4-140283613-1	E15
Merged-chr16-30641869-2	chr16	30641601	30642400	Merged-chr16-30641737-1	E13
Merged-chr14-64591615-2	chr14	64591401	64591800	Merged-chr14-64591630-1	E2
Merged-chr17-13732725-2	chr17	13732001	13733200	Merged-chr17-13732849-1	E13
Merged-chr12-11781590-2	chr12	11765601	11796200	Merged-chr12-11782279-2	E16
Merged-chr17-28485859-2	chr17	28485401	28486800	Merged-chr17-28485617-2	E2
Merged-chr8-79030491-2	chr8	79028601	79031200	Merged-chr8-79031081-2	E2
Merged-chr3-88553550-2	chr3	88552601	88554400	Merged-chr3-88553600-1	E2
Merged-chr2-38992176-2	chr2	38992001	38992400	Merged-chr2-38992152-1	E4
Merged-chr7-6760164-2	chr7	6759601	6760600	Merged-chr7-6760227-2	E14
Merged-chr11-94163292-2	chr11	94162801	94164000	Merged-chr11-94163184-2	E3
Merged-chr5-106758135-2	chr5	106757801	106758400	Merged-chr5-106758170-2	E3
Merged-chr7-49778390-2	chr7	49778201	49778800	Merged-chr7-49778279-2	E2
Merged-chr8-106965156-2	chr8	106964601	106966800	Merged-chr8-106964612-2	E11
Merged-chr10-72588380-2	chr10	72578001	72598000	Merged-chr10-72588760-2	E16
Merged-chr5-121541131-2	chr5	121539401	121542400	Merged-chr5-121541361-1	E11
Merged-chr12-110484176-2	chr12	110483201	110485400	Merged-chr12-110484051-1	E12
Merged-chr19-46755288-2	chr19	46755001	46755600	Merged-chr19-46755276-2	E4
Merged-chr16-10887436-2	chr16	10886601	10887800	Merged-chr16-10887671-2	E4
Merged-chr14-68935065-2	chr14	68935001	68935200	Merged-chr14-68935029-2	E5
Merged-chr11-68691456-2	chr11	68691201	68691800	Merged-chr11-68691412-2	E2
Merged-chr4-146908998-2	chr4	146907801	146909400	Merged-chr4-146909395-1	E12
Merged-chr12-71886268-2	chr12	71886201	71886400	Merged-chr12-71886235-1	E10
Merged-chr2-135073153-2	chr2	135072801	135073400	Merged-chr2-135073205-2	E13
Merged-chr1-175512331-2	chr1	175512001	175512600	Merged-chr1-175512361-2	E15
Merged-chr8-72591014-2	chr8	72590201	72592200	Merged-chr8-72590828-2	E10
Merged-chr6-136471094-2	chr6	136471001	136471200	Merged-chr6-136471087-2	E2
Merged-chr4-155694812-2	chr4	155694001	155695400	Merged-chr4-155694923-2	E2
Merged-chr7-90460554-2	chr7	90460401	90460800	Merged-chr7-90460507-1	E3
Merged-chr11-99815169-2	chr11	99815001	99815400	Merged-chr11-99815138-2	E5
Merged-chr15-88919472-2	chr15	88919201	88919800	Merged-chr15-88919443-2	E14
Merged-chr9-57402453-2	chr9	57402201	57402600	Merged-chr9-57402506-2	E4
Merged-chr4-63495366-2	chr4	63494601	63496400	Merged-chr4-63495231-2	E2
Merged-chr8-105259606-2	chr8	105258601	105260200	Merged-chr8-105259812-2	E2
Merged-chr10-13553215-2	chr10	13552801	13553400	Merged-chr10-13553330-2	E2
Merged-chr5-33275094-2	chr5	33274801	33275400	Merged-chr5-33275088-2	E2
Merged-chr2-24405860-2	chr2	24405801	24406000	Merged-chr2-24405820-1	E3
Merged-chr4-140582730-2	chr4	140582401	140583000	Merged-chr4-140582759-1	E4
Merged-chr11-9116238-2	chr11	9115201	9116800	Merged-chr11-9116476-1	E13
Merged-chr1-119305627-2	chr1	119305401	119306000	Merged-chr1-119305553-2	E2
Merged-chr10-81242250-2	chr10	81242201	81242400	Merged-chr10-81242200-1	E3
Merged-chr2-71652408-2	chr2	71651801	71652800	Merged-chr2-71652515-1	E13
Merged-chr11-6154370-2	chr11	6154001	6154800	Merged-chr11-6154339-1	E12
Merged-chr15-79481469-2	chr15	79481201	79481800	Merged-chr15-79481437-2	E2
Merged-chr10-94426573-2	chr10	94426401	94426800	Merged-chr10-94426545-1	E3
Merged-chr11-99026214-2	chr11	99026001	99026400	Merged-chr11-99026228-2	E3
Merged-chr19-5489106-2	chr19	5488801	5489600	Merged-chr19-5489012-1	E2
Merged-chr9-14642837-2	chr9	14642401	14643600	Merged-chr9-14642673-2	E3
Merged-chr5-137374909-2	chr5	137374601	137375600	Merged-chr5-137374717-2	E3
Merged-chr4-140750491-2	chr4	140750201	140750800	Merged-chr4-140750482-2	E3
Merged-chr3-27183245-2	chr3	27182801	27184000	Merged-chr3-27183090-1	E2
Merged-chr13-19631120-2	chr13	19631001	19631200	Merged-chr13-19631139-2	E13
Merged-chr3-125938333-2	chr3	125937601	125938600	Merged-chr3-125938565-2	E2
Merged-chr13-107668700-2	chr13	107668601	107668800	Merged-chr13-107668699-2	E3
Merged-chr13-48159268-2	chr13	48159201	48159400	Merged-chr13-48159236-2	E13
Merged-chr19-4121304-2	chr19	4121201	4121600	Merged-chr19-4121208-1	E2
Merged-chr2-34480403-2	chr2	34480201	34480600	Merged-chr2-34480405-2	E7
Merged-chr4-151313594-2	chr4	151313201	151313800	Merged-chr4-151313687-1	E6
Merged-chr6-39436748-2	chr6	39434401	39442000	Merged-chr6-39435295-2	E14
Merged-chr7-63956946-2	chr7	63956401	63957200	Merged-chr7-63957091-2	E2
Merged-chr18-77565400-2	chr18	77564801	77566200	Merged-chr18-77565300-2	E2
Merged-chr4-148293646-2	chr4	148293401	148294200	Merged-chr4-148293491-2	E4
Merged-chr2-128265711-2	chr2	128265401	128266200	Merged-chr2-128265621-2	E13
Merged-chr1-11401281-2	chr1	11400201	11402200	Merged-chr1-11401362-2	E14
Merged-chr1-85326650-2	chr1	85325401	85330000	Merged-chr1-85325599-1	E17
Merged-chr2-158631615-2	chr2	158631401	158631800	Merged-chr2-158631630-2	E8
Merged-chr11-118648660-2	chr11	118648401	118649000	Merged-chr11-118648620-2	E4
Merged-chr3-34819690-2	chr3	34819601	34819800	Merged-chr3-34819680-1	E3
Merged-chr5-105415907-2	chr5	105415201	105416400	Merged-chr5-105416014-2	E2
Merged-chr9-78845601-2	chr9	78845401	78846200	Merged-chr9-78845401-1	E14
Merged-chr15-85017244-2	chr15	85017001	85017600	Merged-chr15-85017188-1	E3
Merged-chr8-121919927-2	chr8	121919801	121920000	Merged-chr8-121919953-2	E4
Merged-chr11-106493232-2	chr11	106491401	106498400	Merged-chr11-106491563-2	E6
Merged-chr19-4056428-2	chr19	4056001	4057000	Merged-chr19-4056356-2	E13
Merged-chr9-107521389-2	chr9	107521201	107521600	Merged-chr9-107521377-2	E2
Merged-chr6-56652254-2	chr6	56652001	56652600	Merged-chr6-56652208-1	E2
Merged-chr11-58938725-2	chr11	58937801	58939200	Merged-chr11-58938950-1	E2
Merged-chr4-80911850-2	chr4	80911001	80912200	Merged-chr4-80912100-2	E2
Merged-chr6-146437127-2	chr6	146437001	146437400	Merged-chr6-146437054-1	E5
Merged-chr1-88205577-2	chr1	88205201	88205800	Merged-chr1-88205654-2	E2
Merged-chr19-54175969-2	chr19	54175801	54176200	Merged-chr19-54175938-1	E15
Merged-chr17-65702518-2	chr17	65702401	65702800	Merged-chr17-65702435-1	E13
Merged-chr10-59289435-2	chr10	59289201	59290000	Merged-chr10-59289270-1	E3
Merged-chr7-118992626-2	chr7	118992401	118992800	Merged-chr7-118992651-2	E14
Merged-chr17-24251405-2	chr17	24251001	24252000	Merged-chr17-24251309-1	E2
Merged-chr3-57536009-2	chr3	57535801	57536400	Merged-chr3-57535917-2	E7
Merged-chr15-38471001-2	chr15	38470201	38471600	Merged-chr15-38471102-2	E2
Merged-chr4-54073377-2	chr4	54072601	54074600	Merged-chr4-54073154-1	E13
Merged-chr11-74723977-2	chr11	74723201	74724800	Merged-chr11-74723954-2	E2
Merged-chr12-76072056-2	chr12	76071801	76072200	Merged-chr12-76072112-2	E13
Merged-chr3-9082209-2	chr3	9081601	9082800	Merged-chr3-9082218-1	E13
Merged-chr2-39190999-2	chr2	39190801	39191200	Merged-chr2-39190998-2	E3
Merged-chr10-108353067-2	chr10	108352801	108353200	Merged-chr10-108353133-1	E12
Merged-chr7-92806867-2	chr7	92806601	92807000	Merged-chr7-92806934-2	E3
Merged-chr15-51877594-2	chr15	51877201	51877800	Merged-chr15-51877688-1	E2
Merged-chr2-105257969-2	chr2	105255401	105259200	Merged-chr2-105258638-2	E17
Merged-chr3-107680647-2	chr3	107675601	107684200	Merged-chr3-107681393-2	E10
Merged-chr3-36507310-2	chr3	36506001	36510200	Merged-chr3-36506520-2	E16
Merged-chr10-41544735-2	chr10	41544601	41545000	Merged-chr10-41544670-2	E13
Merged-chr15-83991897-2	chr15	83991401	83993000	Merged-chr15-83991593-1	E4
Merged-chr1-93190799-2	chr1	93190201	93191000	Merged-chr1-93190997-1	E2
Merged-chr17-65872896-2	chr17	65872801	65873000	Merged-chr17-65872892-2	E3
Merged-chr5-66686951-2	chr5	66686601	66687200	Merged-chr5-66687002-2	E8
Merged-chr4-147941347-2	chr4	147940801	147942000	Merged-chr4-147941293-2	E2
Merged-chr14-55635537-2	chr14	55635001	55636000	Merged-chr14-55635573-2	E2
Merged-chr16-50457795-2	chr16	50456801	50458600	Merged-chr16-50457889-2	E6
Merged-chr17-47511566-2	chr17	47511201	47512200	Merged-chr17-47511431-2	E2
Merged-chr4-133085425-2	chr4	133085001	133086200	Merged-chr4-133085249-2	E2
Merged-chr8-13916671-2	chr8	13916401	13917000	Merged-chr8-13916642-2	E3
Merged-chr12-86679057-2	chr12	86678401	86679800	Merged-chr12-86679013-1	E2
Merged-chr4-41275486-2	chr4	41274801	41275800	Merged-chr4-41275671-2	E2
Merged-chr13-95018180-2	chr13	95017801	95018600	Merged-chr13-95018160-2	E14
Merged-chr4-116821001-2	chr4	116820001	116821800	Merged-chr4-116821102-1	E2
Merged-chr18-67330408-2	chr18	67330201	67330600	Merged-chr18-67330416-2	E14
Merged-chr13-55205281-2	chr13	55203601	55206200	Merged-chr13-55205662-2	E13
Merged-chr11-67094804-2	chr11	67094401	67095000	Merged-chr11-67094907-1	E2
Merged-chr11-20231384-2	chr11	20231201	20231800	Merged-chr11-20231267-2	E13
Merged-chr5-81519584-2	chr5	81518801	81520400	Merged-chr5-81519567-2	E15
Merged-chr7-49070823-2	chr7	49068801	49071800	Merged-chr7-49071345-2	E14
Merged-chr6-94647787-2	chr6	94647601	94648200	Merged-chr6-94647674-2	E2
Merged-chr8-120578096-2	chr8	120577801	120578600	Merged-chr8-120577992-1	E8
Merged-chr4-133904466-2	chr4	133903601	133905200	Merged-chr4-133904531-2	E14
Merged-chr10-75936186-2	chr10	75935601	75936600	Merged-chr10-75936271-1	E2
Merged-chr9-63124180-2	chr9	63123801	63124400	Merged-chr9-63124259-1	E2
Merged-chr5-139978977-2	chr5	139978201	139979400	Merged-chr5-139979154-1	E4
Merged-chr19-53748942-2	chr19	53748801	53749200	Merged-chr19-53748883-1	E6
Merged-chr4-116877239-2	chr4	116876601	116878200	Merged-chr4-116877077-1	E2
Merged-chr11-60161493-2	chr11	60161401	60161600	Merged-chr11-60161486-2	E3
Merged-chr4-53440582-2	chr4	53440001	53441400	Merged-chr4-53440463-2	E2
Merged-chr15-73687743-2	chr15	73687601	73687800	Merged-chr15-73687785-1	E14
Merged-chr2-152128804-2	chr2	152128601	152129000	Merged-chr2-152128808-1	E14
Merged-chr4-40722886-2	chr4	40722001	40723200	Merged-chr4-40723172-2	E2
Merged-chr5-101820049-2	chr5	101819801	101820200	Merged-chr5-101820097-1	E3
Merged-chr11-20772811-2	chr11	20771601	20773800	Merged-chr11-20772921-2	E14
Merged-chr15-99295310-2	chr15	99294601	99296000	Merged-chr15-99295320-2	E2
Merged-chr11-100728729-2	chr11	100728601	100728800	Merged-chr11-100728757-2	E8
Merged-chr1-160363605-2	chr1	160363401	160363800	Merged-chr1-160363610-1	E15
[truncated: 1,462 more rows]

## Sheet: MYOD1
MergedPeakID	chr	start	end	MYOD1_Peak_ID	ChromHMM_state
Merged-chr13-64432665-2	chr13	64432401	64433200	Merged-chr13-64432530-2	E2
Merged-chr4-61824530-2	chr4	61823001	61825200	Merged-chr4-61824959-2	E18
Merged-chr6-36787293-2	chr6	36785401	36788200	Merged-chr6-36787786-2	E17
Merged-chr15-38250543-2	chr15	38248401	38251400	Merged-chr15-38251186-2	E6
Merged-chr9-58009214-2	chr9	58009001	58009400	Merged-chr9-58009227-2	E13
Merged-chr2-30779912-2	chr2	30779401	30780400	Merged-chr2-30779923-2	E3
Merged-chr5-23433448-2	chr5	23432801	23435200	Merged-chr5-23432896-1	E2
Merged-chr14-118696077-2	chr14	118696001	118696200	Merged-chr14-118696054-2	E2
Merged-chr4-136177391-2	chr4	136177201	136177800	Merged-chr4-136177282-2	E3
Merged-chr13-112868784-2	chr13	112867601	112870400	Merged-chr13-112868568-1	E9
Merged-chr3-129918599-2	chr3	129918401	129918800	Merged-chr3-129918598-2	E5
Merged-chr10-77742174-2	chr10	77741001	77742800	Merged-chr10-77742447-2	E4
Merged-chr8-123332841-2	chr8	123332201	123333600	Merged-chr8-123332782-1	E2
Merged-chr17-75463521-2	chr17	75463201	75463800	Merged-chr17-75463542-2	E15
Merged-chr11-52764735-2	chr11	52764201	52765600	Merged-chr11-52764570-2	E2
Merged-chr11-117930970-2	chr11	117930601	117931400	Merged-chr11-117930939-2	E2
Merged-chr18-22649595-2	chr18	22649401	22649800	Merged-chr18-22649590-2	E15
Merged-chr2-165239759-2	chr2	165239601	165240000	Merged-chr2-165239717-1	E3
Merged-chr7-45616465-2	chr7	45616001	45616800	Merged-chr7-45616529-1	E3
Merged-chr7-97341147-2	chr7	97340801	97341400	Merged-chr7-97341193-2	E13
Merged-chr6-115717560-2	chr6	115717201	115718200	Merged-chr6-115717420-1	E13
Merged-chr2-28607615-2	chr2	28607401	28608000	Merged-chr2-28607529-1	E3
Merged-chr5-52424895-2	chr5	52424601	52425000	Merged-chr5-52424990-2	E5
Merged-chr18-85483961-2	chr18	85479001	85489800	Merged-chr18-85483522-2	E16
Merged-chr16-74369165-2	chr16	74363601	74375800	Merged-chr16-74368629-2	E16
Merged-chr1-179238836-2	chr1	179236801	179240800	Merged-chr1-179238871-2	E10
Merged-chr5-26413119-2	chr5	26413001	26413200	Merged-chr5-26413137-2	E5
Merged-chr5-21617776-2	chr5	21617601	21618000	Merged-chr5-21617751-2	E5
Merged-chr17-58041388-2	chr17	58041001	58041600	Merged-chr17-58041476-2	E15
Merged-chr12-12904776-2	chr12	12904401	12905000	Merged-chr12-12904852-1	E2
Merged-chr4-132155508-2	chr4	132155201	132155800	Merged-chr4-132155515-2	E13
Merged-chr13-112375958-2	chr13	112375801	112376200	Merged-chr13-112375916-2	E3
Merged-chr17-67125062-2	chr17	67124801	67125400	Merged-chr17-67125023-2	E5
Merged-chr4-150809470-2	chr4	150809201	150809600	Merged-chr4-150809540-2	E4
Merged-chr1-190161369-2	chr1	190160801	190161600	Merged-chr1-190161537-2	E3
Merged-chr7-48944790-2	chr7	48944401	48945000	Merged-chr7-48944879-1	E15
Merged-chr11-76351161-2	chr11	76350801	76351400	Merged-chr11-76351221-1	E13
Merged-chr11-118140956-2	chr11	118140801	118141400	Merged-chr11-118140811-2	E13
Merged-chr17-36954332-2	chr17	36953001	36957400	Merged-chr17-36953464-2	E9
Merged-chr9-46903828-2	chr9	46903201	46904200	Merged-chr9-46903956-1	E7
Merged-chr11-106674976-2	chr11	106674401	106676000	Merged-chr11-106674752-2	E3
Merged-chr17-16900602-2	chr17	16894401	16902800	Merged-chr17-16902603-2	E16
Merged-chr17-32162625-2	chr17	32162001	32163000	Merged-chr17-32162749-2	E2
Merged-chr9-47098960-2	chr9	47098401	47100000	Merged-chr9-47098720-2	E5
Merged-chr9-62477289-2	chr9	62476801	62477600	Merged-chr9-62477377-1	E3
Merged-chr1-171453278-2	chr1	171453001	171453800	Merged-chr1-171453156-2	E14
Merged-chr13-17695506-2	chr13	17695001	17695800	Merged-chr13-17695612-1	E2
Merged-chr7-133776597-2	chr7	133776001	133777200	Merged-chr7-133776594-2	E2
Merged-chr11-67081270-2	chr11	67081001	67081400	Merged-chr11-67081339-1	E3
Merged-chr4-11053918-2	chr4	11053801	11054000	Merged-chr4-11053935-2	E14
Merged-chr5-140882448-2	chr5	140882201	140882600	Merged-chr5-140882496-1	E3
Merged-chr19-5637676-2	chr19	5636801	5638800	Merged-chr19-5637551-1	E2
Merged-chr15-72690038-2	chr15	72689801	72690400	Merged-chr15-72689976-1	E15
Merged-chr7-127084679-2	chr7	127083401	127085400	Merged-chr7-127084958-2	E6
Merged-chr4-140171235-2	chr4	140170201	140171600	Merged-chr4-140171569-2	E4
Merged-chr2-128912060-2	chr2	128911001	128913000	Merged-chr2-128912120-2	E17
Merged-chr11-120659552-2	chr11	120658601	120661600	Merged-chr11-120659004-2	E2
Merged-chr15-84657543-2	chr15	84657401	84657600	Merged-chr15-84657586-2	E3
Merged-chr1-134061248-2	chr1	134060801	134061600	Merged-chr1-134061295-2	E2
Merged-chr14-46947886-2	chr14	46947801	46948000	Merged-chr14-46947872-2	E4
Merged-chr3-88473184-2	chr3	88472601	88473800	Merged-chr3-88473168-2	E14
Merged-chr13-50907141-2	chr13	50907001	50907200	Merged-chr13-50907181-2	E15
Merged-chr8-18894958-2	chr8	18894201	18896000	Merged-chr8-18894816-2	E14
Merged-chr13-74929068-2	chr13	74928401	74929400	Merged-chr13-74929236-1	E15
Merged-chr10-128526272-2	chr10	128526001	128526800	Merged-chr10-128526143-2	E13
Merged-chr12-86898137-2	chr12	86898001	86898200	Merged-chr12-86898173-1	E2
Merged-chr15-73570458-2	chr15	73570401	73570600	Merged-chr15-73570416-1	E4
Merged-chr4-150184263-2	chr4	150184001	150185000	Merged-chr4-150184026-1	E6
Merged-chr16-17210132-2	chr16	17208401	17210800	Merged-chr16-17210664-2	E2
Merged-chr11-115258307-2	chr11	115258201	115258400	Merged-chr11-115258314-2	E3
Merged-chr17-65961953-2	chr17	65961401	65962200	Merged-chr17-65962105-2	E15
Merged-chr5-125111266-2	chr5	125110801	125111600	Merged-chr5-125111331-2	E8
Merged-chr9-38878789-2	chr9	38876801	38879600	Merged-chr9-38879378-2	E16
Merged-chr7-16528124-2	chr7	16525801	16535000	Merged-chr7-16525847-2	E10
Merged-chr1-65294185-2	chr1	65291801	65299200	Merged-chr1-65292869-2	E17
Merged-chr15-100351990-2	chr15	100351401	100352800	Merged-chr15-100351879-1	E6
Merged-chr10-58231967-2	chr10	58231801	58232200	Merged-chr10-58231933-1	E2
Merged-chr16-35680353-2	chr16	35679001	35681200	Merged-chr16-35680606-2	E6
Merged-chr12-51762482-2	chr12	51752201	51768400	Merged-chr12-51764664-2	E9
Merged-chr10-81037261-2	chr10	81037201	81037400	Merged-chr10-81037221-2	E3
Merged-chr12-83608922-2	chr12	83606601	83611800	Merged-chr12-83608643-2	E6
Merged-chr18-83543699-2	chr18	83542201	83545000	Merged-chr18-83543798-1	E17
Merged-chr7-43777992-2	chr7	43777801	43778200	Merged-chr7-43777984-2	E6
Merged-chr19-22887204-2	chr19	22885201	22889200	Merged-chr19-22887208-2	E17
Merged-chr15-75658718-2	chr15	75658601	75658800	Merged-chr15-75658735-2	E3
Merged-chr4-11646138-2	chr4	11640801	11648000	Merged-chr4-11647876-1	E16
Merged-chr10-76067823-2	chr10	76067601	76068000	Merged-chr10-76067846-2	E15
Merged-chr13-99609460-2	chr13	99609201	99609600	Merged-chr13-99609519-1	E14
Merged-chr9-61084940-2	chr9	61084401	61085200	Merged-chr9-61085080-2	E4
Merged-chr12-27140528-2	chr12	27140401	27140800	Merged-chr12-27140455-2	E3
Merged-chr15-84646654-2	chr15	84644201	84651200	Merged-chr15-84645608-1	E6
Merged-chr7-132430452-2	chr7	132426401	132432800	Merged-chr7-132431303-2	E17
Merged-chr5-131606737-2	chr5	131604201	131610800	Merged-chr5-131605973-2	E17
Merged-chr11-8567498-2	chr11	8564201	8569200	Merged-chr11-8568296-1	E12
Merged-chr10-99132699-2	chr10	99132001	99134000	Merged-chr10-99132397-2	E5
Merged-chr8-116608155-2	chr8	116608001	116608400	Merged-chr8-116608109-2	E3
Merged-chr11-52360796-2	chr11	52359601	52362000	Merged-chr11-52360791-1	E2
Merged-chr11-49739290-2	chr11	49738201	49740600	Merged-chr11-49739179-2	E14
Merged-chr11-79327133-2	chr11	79327001	79327200	Merged-chr11-79327165-1	E3
Merged-chr18-33950578-2	chr18	33950201	33950800	Merged-chr18-33950655-2	E2
Merged-chr10-111697186-2	chr10	111695001	111699800	Merged-chr10-111696971-2	E17
Merged-chr5-111121446-2	chr5	111121201	111121600	Merged-chr5-111121492-2	E4
Merged-chr18-75677844-2	chr18	75676201	75679800	Merged-chr18-75677688-1	E6
Merged-chr16-17530805-2	chr16	17530001	17531400	Merged-chr16-17530909-2	E2
Merged-chr8-95386427-2	chr8	95386201	95387000	Merged-chr8-95386254-2	E14
Merged-chr15-101229337-2	chr15	101228801	101229800	Merged-chr15-101229373-2	E8
Merged-chr11-88758541-2	chr11	88758401	88758600	Merged-chr11-88758581-2	E3
Merged-chr8-46702834-2	chr8	46701401	46703400	Merged-chr8-46703267-2	E17
Merged-chr10-90904810-2	chr10	90903401	90907200	Merged-chr10-90904320-2	E17
Merged-chr8-122651013-2	chr8	122647801	122653000	Merged-chr8-122651626-2	E4
Merged-chr15-98831982-2	chr15	98831601	98832400	Merged-chr15-98831964-1	E12
Merged-chr11-57912012-2	chr11	57911601	57912200	Merged-chr11-57912123-2	E3
Merged-chr14-5903086-2	chr14	5899201	5904400	Merged-chr14-5904371-1	E17
Merged-chr13-51919082-2	chr13	51918801	51919400	Merged-chr13-51919063-2	E3
Merged-chr6-122346448-2	chr6	122345801	122346800	Merged-chr6-122346596-2	E13
Merged-chr15-98516132-2	chr15	98514801	98517400	Merged-chr15-98516163-1	E10
Merged-chr8-19942851-2	chr8	19942801	19943000	Merged-chr8-19942802-2	E14
Merged-chr12-100304726-2	chr12	100304001	100306000	Merged-chr12-100304452-2	E7
Merged-chr19-61001523-2	chr19	61001401	61001600	Merged-chr19-61001545-2	E5
Merged-chr16-7695283-2	chr16	7695201	7695400	Merged-chr16-7695266-1	E15
Merged-chr12-56534880-2	chr12	56534001	56535200	Merged-chr12-56535159-2	E2
Merged-chr6-15716315-2	chr6	15715801	15716600	Merged-chr6-15716429-1	E16
Merged-chr7-79428141-2	chr7	79427001	79428800	Merged-chr7-79428381-2	E8
Merged-chr1-75506260-2	chr1	75505001	75506800	Merged-chr1-75506619-2	E2
Merged-chr7-19786265-2	chr7	19786001	19786600	Merged-chr7-19786229-1	E4
Merged-chr13-54884146-2	chr13	54883801	54885000	Merged-chr13-54883892-2	E4
Merged-chr17-36114296-2	chr17	36114201	36114400	Merged-chr17-36114291-2	E5
Merged-chr7-63956963-2	chr7	63956401	63957200	Merged-chr7-63957126-2	E2
Merged-chr12-111136168-2	chr12	111135801	111136600	Merged-chr12-111136135-2	E4
Merged-chr4-63446109-2	chr4	63443401	63450200	Merged-chr4-63445418-2	E10
Merged-chr9-63756203-2	chr9	63755601	63756600	Merged-chr9-63756305-2	E1
Merged-chr7-75178070-2	chr7	75172601	75180200	Merged-chr7-75179739-1	E17
Merged-chr19-31460898-2	chr19	31460001	31461200	Merged-chr19-31461196-2	E17
Merged-chr13-49112798-2	chr13	49112401	49113200	Merged-chr13-49112796-2	E5
Merged-chr1-20058518-2	chr1	20058401	20058600	Merged-chr1-20058536-2	E5
Merged-chr4-145008624-2	chr4	145006401	145009400	Merged-chr4-145009347-1	E10
Merged-chr3-40745768-2	chr3	40745401	40746200	Merged-chr3-40745735-2	E2
Merged-chr1-134419608-2	chr1	134418601	134420800	Merged-chr1-134419515-2	E12
Merged-chr4-147586938-2	chr4	147586401	147587600	Merged-chr4-147586876-1	E14
Merged-chr6-128236792-2	chr6	128236601	128237000	Merged-chr6-128236784-2	E8
Merged-chr18-74868987-2	chr18	74868201	74869400	Merged-chr18-74869174-2	E5
Merged-chr6-125442781-2	chr6	125442601	125443000	Merged-chr6-125442761-2	E13
Merged-chr10-40258644-2	chr10	40257801	40259600	Merged-chr10-40258588-1	E13
Merged-chr7-52164787-2	chr7	52164601	52165200	Merged-chr7-52164674-2	E13
Merged-chr4-120616922-2	chr4	120616801	120617000	Merged-chr4-120616943-2	E2
Merged-chr7-29443986-2	chr7	29443401	29444600	Merged-chr7-29443971-2	E14
Merged-chr8-19754803-2	chr8	19715401	19784400	Merged-chr8-19759706-2	E16
Merged-chr10-60188959-2	chr10	60188001	60190800	Merged-chr10-60188517-1	E6
Merged-chr11-117545008-2	chr11	117543601	117546200	Merged-chr11-117545115-2	E14
Merged-chr8-120416767-2	chr8	120416401	120417200	Merged-chr8-120416733-1	E2
Merged-chr17-31328843-2	chr17	31328601	31329400	Merged-chr17-31328686-2	E13
Merged-chr2-68364306-2	chr2	68364201	68364400	Merged-chr2-68364312-2	E5
Merged-chr2-155050783-2	chr2	155050401	155051400	Merged-chr2-155050666-2	E2
Merged-chr5-114914957-2	chr5	114914801	114915200	Merged-chr5-114914914-2	E3
Merged-chr12-105550402-2	chr12	105549201	105551400	Merged-chr12-105550504-2	E6
Merged-chr14-33535449-2	chr14	33535201	33535600	Merged-chr14-33535497-2	E5
Merged-chr11-9132313-2	chr11	9132001	9133200	Merged-chr11-9132025-2	E9
Merged-chr8-90244988-2	chr8	90244801	90245200	Merged-chr8-90244975-2	E5
Merged-chr2-103302927-2	chr2	103302601	103303200	Merged-chr2-103302954-2	E15
Merged-chr13-20916921-2	chr13	20916801	20917200	Merged-chr13-20916841-2	E5
Merged-chr17-85046140-2	chr17	85045801	85046800	Merged-chr17-85045980-2	E17
Merged-chr5-109876800-2	chr5	109875001	109880600	Merged-chr5-109875799-1	E16
Merged-chr11-100355887-2	chr11	100355201	100356800	Merged-chr11-100355774-2	E2
Merged-chr8-61986306-2	chr8	61986201	61986400	Merged-chr8-61986312-1	E5
Merged-chr5-115490616-2	chr5	115490201	115491800	Merged-chr5-115490232-1	E13
Merged-chr4-107713105-2	chr4	107713001	107713200	Merged-chr4-107713110-2	E5
Merged-chr9-85479333-2	chr9	85470801	85483200	Merged-chr9-85481666-2	E16
Merged-chr9-63535195-2	chr9	63535001	63535600	Merged-chr9-63535089-2	E4
Merged-chr4-155785133-2	chr4	155785001	155785200	Merged-chr4-155785165-2	E14
Merged-chr5-105415900-2	chr5	105415201	105416400	Merged-chr5-105415999-2	E2
Merged-chr1-93668905-2	chr1	93668801	93669000	Merged-chr1-93668909-2	E2
Merged-chr17-29118322-2	chr17	29118201	29118400	Merged-chr17-29118343-2	E4
Merged-chr8-106534440-2	chr8	106533601	106534800	Merged-chr8-106534680-1	E14
Merged-chr3-148696722-2	chr3	148696601	148696800	Merged-chr3-148696743-2	E15
Merged-chr9-73331889-2	chr9	73331801	73332000	Merged-chr9-73331878-2	E14
Merged-chr4-140575051-2	chr4	140574801	140575200	Merged-chr4-140575102-2	E6
Merged-chr11-99815200-2	chr11	99815001	99815400	Merged-chr11-99815199-2	E5
Merged-chr19-10072118-2	chr19	10072001	10072200	Merged-chr19-10072135-2	E8
Merged-chr11-13006837-2	chr11	13006201	13007800	Merged-chr11-13006673-2	E14
Merged-chr19-38060351-2	chr19	38060201	38060600	Merged-chr19-38060302-2	E12
Merged-chr1-189747983-2	chr1	189747201	189749400	Merged-chr1-189747665-2	E10
Merged-chr4-134113562-2	chr4	134112201	134115000	Merged-chr4-134113524-2	E3
Merged-chr10-61423449-2	chr10	61423201	61423600	Merged-chr10-61423497-2	E2
Merged-chr2-71388109-2	chr2	71387601	71389000	Merged-chr2-71387917-2	E13
Merged-chr17-64875036-2	chr17	64874801	64875200	Merged-chr17-64875072-2	E6
Merged-chr9-48860759-2	chr9	48860601	48861000	Merged-chr9-48860717-1	E14
Merged-chr13-3642206-2	chr13	3642001	3642400	Merged-chr13-3642212-2	E3
Merged-chr5-100311992-2	chr5	100311001	100312400	Merged-chr5-100312283-1	E6
Merged-chr8-106136070-2	chr8	106135201	106138600	Merged-chr8-106135240-2	E2
Merged-chr19-6322150-2	chr19	6321601	6322800	Merged-chr19-6322100-2	E2
Merged-chr14-75855405-2	chr14	75855201	75855600	Merged-chr14-75855409-2	E2
Merged-chr18-72949390-2	chr18	72949001	72949800	Merged-chr18-72949379-2	E15
Merged-chr5-130038152-2	chr5	130037801	130038400	Merged-chr5-130038204-2	E8
Merged-chr17-47291665-2	chr17	47291401	47292000	Merged-chr17-47291630-1	E7
Merged-chr17-31587414-2	chr17	31586601	31589800	Merged-chr17-31586628-2	E14
Merged-chr9-14859137-2	chr9	14858801	14859800	Merged-chr9-14858973-2	E1
Merged-chr6-117765989-2	chr6	117765801	117766200	Merged-chr6-117765977-2	E5
Merged-chr2-58665589-2	chr2	58665401	58665800	Merged-chr2-58665578-2	E15
Merged-chr1-185983282-2	chr1	185977401	185985800	Merged-chr1-185984963-2	E16
Merged-chr8-10946347-2	chr8	10946001	10946800	Merged-chr8-10946294-2	E2
Merged-chr8-123973657-2	chr8	123973601	123973800	Merged-chr8-123973613-1	E7
Merged-chr5-118322024-2	chr5	118321601	118322200	Merged-chr5-118322148-1	E3
Merged-chr10-78260698-2	chr10	78259201	78261400	Merged-chr10-78261096-1	E13
Merged-chr6-31245394-2	chr6	31243201	31247200	Merged-chr6-31245587-2	E6
Merged-chr13-37517533-2	chr13	37517401	37517600	Merged-chr13-37517566-2	E14
Merged-chr2-105263610-2	chr2	105263001	105264600	Merged-chr2-105263420-2	E14
Merged-chr17-51804352-2	chr17	51803801	51806000	Merged-chr17-51803803-1	E17
Merged-chr2-154639345-2	chr2	154638401	154640200	Merged-chr2-154639390-2	E9
Merged-chr7-64234695-2	chr7	64231201	64236600	Merged-chr7-64235490-2	E17
Merged-chr17-28346040-2	chr17	28345801	28346400	Merged-chr17-28345980-1	E3
Merged-chr11-116766697-2	chr11	116766601	116766800	Merged-chr11-116766693-1	E3
Merged-chr5-123150089-2	chr5	123149401	123150400	Merged-chr5-123150278-2	E2
Merged-chr2-165693219-2	chr2	165693001	165693600	Merged-chr2-165693138-2	E4
Merged-chr4-44633941-2	chr4	44633801	44634000	Merged-chr4-44633981-1	E4
Merged-chr8-124021481-2	chr8	124021201	124021800	Merged-chr8-124021461-2	E2
Merged-chr3-144720440-2	chr3	144720201	144721000	Merged-chr3-144720279-2	E13
Merged-chr1-78181949-2	chr1	78181801	78182000	Merged-chr1-78181997-1	E4
Merged-chr2-152804499-2	chr2	152804401	152804600	Merged-chr2-152804497-2	E2
Merged-chr4-142059447-2	chr4	142059201	142060000	Merged-chr4-142059293-2	E14
Merged-chr6-100162278-2	chr6	100162201	100162400	Merged-chr6-100162255-2	E4
Merged-chr9-13954119-2	chr9	13943401	13958400	Merged-chr9-13957338-2	E17
Merged-chr7-16948389-2	chr7	16947601	16949800	Merged-chr7-16948077-2	E1
Merged-chr13-44751593-2	chr13	44748201	44754400	Merged-chr13-44751886-1	E11
Merged-chr15-103170158-2	chr15	103170001	103170400	Merged-chr15-103170115-2	E2
Merged-chr11-77446966-2	chr11	77446801	77447200	Merged-chr11-77446931-2	E3
Merged-chr15-37780421-2	chr15	37780201	37780600	Merged-chr15-37780441-2	E4
Merged-chr6-124994121-2	chr6	124994001	124994400	Merged-chr6-124994041-1	E3
Merged-chr11-80412566-2	chr11	80411001	80416800	Merged-chr11-80411231-2	E10
Merged-chr8-70429273-2	chr8	70428401	70430200	Merged-chr8-70429246-2	E4
Merged-chr8-114314979-2	chr8	114314201	114315600	Merged-chr8-114315057-1	E15
Merged-chr5-139368919-2	chr5	139368801	139369200	Merged-chr5-139368838-2	E3
Merged-chr16-44238982-2	chr16	44238401	44239400	Merged-chr16-44239063-2	E5
Merged-chr4-131284251-2	chr4	131283601	131285600	Merged-chr4-131283901-2	E4
Merged-chr4-145406688-2	chr4	145405201	145407600	Merged-chr4-145406975-1	E10
Merged-chr17-64548754-2	chr17	64548601	64549000	Merged-chr17-64548707-2	E5
Merged-chr9-50617067-2	chr9	50616601	50617400	Merged-chr9-50617134-2	E2
Merged-chr11-32000395-2	chr11	32000201	32000600	Merged-chr11-32000390-2	E3
Merged-chr1-134063395-2	chr1	134062801	134064000	Merged-chr1-134063389-2	E2
Merged-chr4-155163532-2	chr4	155163201	155164000	Merged-chr4-155163463-2	E2
Merged-chr19-42162162-2	chr19	42160001	42163800	Merged-chr19-42162423-1	E6
Merged-chr13-6000602-2	chr13	5998401	6003200	Merged-chr13-6000404-2	E17
Merged-chr15-103411916-2	chr15	103411801	103412000	Merged-chr15-103411931-2	E13
Merged-chr4-57855475-2	chr4	57854801	57856000	Merged-chr4-57855550-2	E8
Merged-chr5-36772829-2	chr5	36772601	36773200	Merged-chr5-36772758-2	E3
Merged-chr17-23722363-2	chr17	23720601	23723000	Merged-chr17-23722926-2	E4
Merged-chr11-51619944-2	chr11	51619801	51620200	Merged-chr11-51619888-1	E2
Merged-chr10-64147440-2	chr10	64138801	64155200	Merged-chr10-64147880-2	E16
Merged-chr8-107085845-2	chr8	107085601	107086000	Merged-chr8-107085890-2	E12
Merged-chr7-77234730-2	chr7	77234601	77235000	Merged-chr7-77234660-2	E15
Merged-chr15-55976065-2	chr15	55975801	55976200	Merged-chr15-55976129-1	E5
Merged-chr14-102072500-2	chr14	102072201	102073000	Merged-chr14-102072400-2	E15
Merged-chr4-150263767-2	chr4	150263001	150264200	Merged-chr4-150263933-2	E14
Merged-chr2-167540262-2	chr2	167539801	167540600	Merged-chr2-167540324-2	E3
Merged-chr8-33831880-2	chr8	33831201	33832200	Merged-chr8-33832059-2	E8
Merged-chr11-69362143-2	chr11	69362001	69362200	Merged-chr11-69362186-2	E4
Merged-chr2-58713618-2	chr2	58709201	58721800	Merged-chr2-58711735-2	E17
Merged-chr15-7168074-2	chr15	7167401	7168800	Merged-chr15-7168048-2	E8
Merged-chr2-101665732-2	chr2	101665201	101666600	Merged-chr2-101665564-2	E14
Merged-chr11-29775596-2	chr11	29774001	29779400	Merged-chr11-29774491-2	E6
Merged-chr17-5165415-2	chr17	5165201	5165600	Merged-chr17-5165429-2	E3
Merged-chr12-28507240-2	chr12	28507001	28507400	Merged-chr12-28507280-2	E5
Merged-chr7-143338561-2	chr7	143336001	143340600	Merged-chr7-143338822-2	E6
Merged-chr18-35341809-2	chr18	35341401	35342000	Merged-chr18-35341917-2	E13
Merged-chr11-55810906-2	chr11	55810601	55811200	Merged-chr11-55810912-1	E15
Merged-chr11-74584931-2	chr11	74584401	74585200	Merged-chr11-74585061-1	E14
Merged-chr3-83130013-2	chr3	83129801	83130600	Merged-chr3-83129826-1	E1
Merged-chr13-51510834-2	chr13	51510001	51511800	Merged-chr13-51510768-1	E6
Merged-chr9-8035794-2	chr9	8035601	8036000	Merged-chr9-8035787-2	E13
Merged-chr12-73242120-2	chr12	73242001	73242200	Merged-chr12-73242140-2	E3
Merged-chr7-49344063-2	chr7	49344001	49344200	Merged-chr7-49344026-1	E14
Merged-chr6-86523786-2	chr6	86522201	86525200	Merged-chr6-86523872-2	E12
Merged-chr11-74858672-2	chr11	74858201	74859000	Merged-chr11-74858744-1	E8
Merged-chr17-32164364-2	chr17	32164001	32164600	Merged-chr17-32164428-1	E3
Merged-chr1-173967152-2	chr1	173964801	173973200	Merged-chr1-173965304-2	E17
Merged-chr8-19784838-2	chr8	19784601	19785200	Merged-chr8-19784775-1	E2
Merged-chr13-59097318-2	chr13	59095601	59100000	Merged-chr13-59096835-2	E6
Merged-chr9-62541327-2	chr9	62540801	62541600	Merged-chr9-62541453-2	E3
Merged-chr7-108197069-2	chr7	108196601	108197400	Merged-chr7-108197138-2	E13
Merged-chr4-140197280-2	chr4	140197201	140197400	Merged-chr4-140197259-1	E3
Merged-chr8-83999042-2	chr8	83998401	83999400	Merged-chr8-83999183-2	E2
Merged-chr5-132923710-2	chr5	132923401	132924400	Merged-chr5-132923520-2	E15
Merged-chr7-126540273-2	chr7	126538401	126543800	Merged-chr7-126539445-2	E10
Merged-chr3-21936172-2	chr3	21935801	21937000	Merged-chr3-21935943-1	E2
Merged-chr7-19084412-2	chr7	19083801	19084800	Merged-chr7-19084523-2	E3
Merged-chr8-13887974-2	chr8	13887601	13888200	Merged-chr8-13888048-1	E8
Merged-chr10-8287511-2	chr10	8287201	8287800	Merged-chr10-8287522-2	E3
Merged-chr1-131431904-2	chr1	131431401	131432200	Merged-chr1-131432007-2	E7
Merged-chr4-126111472-2	chr4	126111401	126111600	Merged-chr4-126111444-1	E13
Merged-chr7-112743900-2	chr7	112743801	112744000	Merged-chr7-112743900-1	E2
Merged-chr5-63958048-2	chr5	63957201	63959400	Merged-chr5-63957796-1	E14
Merged-chr17-49718746-2	chr17	49717201	49722200	Merged-chr17-49717791-2	E17
Merged-chr3-126558952-2	chr3	126558401	126559400	Merged-chr3-126559004-2	E15
Merged-chr15-83535476-2	chr15	83534801	83536000	Merged-chr15-83535551-1	E3
Merged-chr18-83841020-2	chr18	83840801	83841200	Merged-chr18-83841040-2	E5
Merged-chr15-76350818-2	chr15	76350401	76352000	Merged-chr15-76350435-1	E2
Merged-chr2-166389726-2	chr2	166389401	166390000	Merged-chr2-166389751-2	E6
Merged-chr1-170655714-2	chr1	170655401	170656000	Merged-chr1-170655727-2	E4
Merged-chr5-24503207-2	chr5	24503001	24503400	Merged-chr5-24503213-2	E15
Merged-chr13-98890501-2	chr13	98890201	98891200	Merged-chr13-98890302-2	E2
Merged-chr17-8205376-2	chr17	8205201	8205600	Merged-chr17-8205351-2	E5
Merged-chr15-99890797-2	chr15	99890201	99891000	Merged-chr15-99890993-2	E13
Merged-chr1-27098126-2	chr1	27065201	27109400	Merged-chr1-27108951-2	E16
Merged-chr18-5163410-2	chr18	5163001	5163800	Merged-chr18-5163419-2	E2
Merged-chr15-103155954-2	chr15	103155801	103156200	Merged-chr15-103155908-2	E2
Merged-chr10-123031838-2	chr10	123030401	123032400	Merged-chr10-123032276-2	E9
Merged-chr2-167109653-2	chr2	167109401	167109800	Merged-chr2-167109706-2	E4
Merged-chr3-95702411-2	chr3	95702201	95703000	Merged-chr3-95702222-2	E13
Merged-chr6-147377828-2	chr6	147377601	147378000	Merged-chr6-147377855-2	E5
Merged-chr8-111730541-2	chr8	111729401	111731000	Merged-chr8-111730882-2	E12
Merged-chr5-37313611-2	chr5	37313401	37314000	Merged-chr5-37313521-2	E7
Merged-chr17-56357731-2	chr17	56357601	56358000	Merged-chr17-56357661-2	E15
Merged-chr6-145587791-2	chr6	145587601	145588200	Merged-chr6-145587682-2	E5
Merged-chr11-96308201-2	chr11	96305201	96311800	Merged-chr11-96307901-1	E1
Merged-chr6-42385813-2	chr6	42385601	42386000	Merged-chr6-42385826-2	E5
Merged-chr13-107679000-2	chr13	107678801	107679200	Merged-chr13-107679000-2	E14
Merged-chr10-42163780-2	chr10	42163601	42164000	Merged-chr10-42163760-2	E5
Merged-chr14-13770959-2	chr14	13770401	13771600	Merged-chr14-13770917-2	E15
Merged-chr14-65052749-2	chr14	65052601	65053000	Merged-chr14-65052698-2	E14
Merged-chr14-45507377-2	chr14	45507201	45507800	Merged-chr14-45507253-1	E14
Merged-chr8-121897114-2	chr8	121896001	121897600	Merged-chr8-121897427-2	E8
Merged-chr11-96900294-2	chr11	96900001	96901000	Merged-chr11-96900087-2	E14
Merged-chr10-85421286-2	chr10	85420601	85421600	Merged-chr10-85421471-2	E7
Merged-chr7-29123942-2	chr7	29123601	29124200	Merged-chr7-29123983-2	E3
Merged-chr2-121535259-2	chr2	121534001	121537000	Merged-chr2-121535017-2	E9
Merged-chr15-41807162-2	chr15	41800201	41819200	Merged-chr15-41804623-2	E10
Merged-chr1-191268689-2	chr1	191267801	191269000	Merged-chr1-191268978-2	E4
Merged-chr1-126317089-2	chr1	126317001	126317200	Merged-chr1-126317078-2	E15
Merged-chr1-55524139-2	chr1	55524001	55524200	Merged-chr1-55524178-2	E5
Merged-chr9-54840200-2	chr9	54839801	54840400	Merged-chr9-54840299-2	E13
Merged-chr1-4834978-2	chr1	4834601	4835800	Merged-chr1-4834756-2	E10
Merged-chr6-116948826-2	chr6	116947201	116949800	Merged-chr6-116949152-2	E17
Merged-chr6-89059802-2	chr6	89059601	89060000	Merged-chr6-89059803-2	E3
Merged-chr1-182408961-2	chr1	182408601	182409600	Merged-chr1-182408821-2	E2
Merged-chr6-128078700-2	chr6	128078201	128079200	Merged-chr6-128078700-1	E4
Merged-chr7-141111117-2	chr7	141110801	141111600	Merged-chr7-141111033-2	E7
Merged-chr18-57376459-2	chr18	57376401	57376600	Merged-chr18-57376418-2	E8
Merged-chr7-92806890-2	chr7	92806601	92807000	Merged-chr7-92806980-2	E3
Merged-chr13-41333296-2	chr13	41330801	41334200	Merged-chr13-41334091-2	E17
Merged-chr9-43441403-2	chr9	43441201	43441600	Merged-chr9-43441405-2	E14
Merged-chr18-63790795-2	chr18	63790601	63791000	Merged-chr18-63790790-2	E7
Merged-chr12-44344353-2	chr12	44344201	44344600	Merged-chr12-44344305-2	E15
Merged-chr12-25475612-2	chr12	25475401	25475800	Merged-chr12-25475623-2	E3
Merged-chr9-100569410-2	chr9	100568001	100570000	Merged-chr9-100569820-2	E1
Merged-chr5-134006895-2	chr5	134006801	134007000	Merged-chr5-134006890-1	E3
Merged-chr5-140579367-2	chr5	140578801	140580600	Merged-chr5-140579034-2	E3
Merged-chr5-77265698-2	chr5	77265201	77266000	Merged-chr5-77265795-1	E2
Merged-chr5-115489419-2	chr5	115488801	115489800	Merged-chr5-115489537-1	E13
Merged-chr7-127089595-2	chr7	127089401	127089800	Merged-chr7-127089589-2	E13
Merged-chr5-151123233-2	chr5	151121401	151124000	Merged-chr5-151123765-1	E14
Merged-chr2-179392429-2	chr2	179391401	179394200	Merged-chr2-179392058-2	E17
Merged-chr5-126765466-2	chr5	126765401	126765600	Merged-chr5-126765431-2	E13
Merged-chr11-109472583-2	chr11	109472201	109472800	Merged-chr11-109472665-1	E2
Merged-chr10-80045934-2	chr10	80045801	80046000	Merged-chr10-80045967-1	E3
Merged-chr7-142229409-2	chr7	142228601	142230000	Merged-chr7-142229518-2	E6
Merged-chr2-29751477-2	chr2	29750801	29752200	Merged-chr2-29751454-2	E2
Merged-chr7-66293064-2	chr7	66292801	66293400	Merged-chr7-66293028-2	E3
Merged-chr11-5847059-2	chr11	5847001	5847200	Merged-chr11-5847018-2	E4
Merged-chr19-45024929-2	chr19	45024801	45025200	Merged-chr19-45024858-2	E2
Merged-chr7-18942496-2	chr7	18942201	18942600	Merged-chr7-18942592-2	E3
Merged-chr7-14584285-2	chr7	14571401	14592200	Merged-chr7-14586770-2	E16
Merged-chr17-84691873-2	chr17	84691601	84692200	Merged-chr17-84691845-1	E3
Merged-chr11-25100181-2	chr11	25100001	25100400	Merged-chr11-25100161-2	E14
Merged-chrX-169036549-2	chrX	169036401	169036800	Merged-chrX-169036498-2	E2
Merged-chr7-130236780-2	chr7	130235601	130237400	Merged-chr7-130237059-2	E15
Merged-chr13-47821452-2	chr13	47821201	47821600	Merged-chr13-47821503-2	E17
Merged-chr11-9783914-2	chr11	9781401	9784800	Merged-chr11-9784727-2	E16
Merged-chr6-54278006-2	chr6	54277201	54279000	Merged-chr6-54277912-2	E14
Merged-chr10-26195230-2	chr10	26194801	26196000	Merged-chr10-26195059-2	E15
Merged-chr7-127104683-2	chr7	127104601	127104800	Merged-chr7-127104665-1	E14
Merged-chr7-25214268-2	chr7	25213601	25214600	Merged-chr7-25214436-2	E7
Merged-chr7-82204454-2	chr7	82204201	82204600	Merged-chr7-82204507-2	E13
Merged-chr15-80203747-2	chr15	80203401	80204400	Merged-chr15-80203593-2	E14
Merged-chr11-100298131-2	chr11	100298001	100298400	Merged-chr11-100298061-2	E2
Merged-chr1-152200346-2	chr1	152188401	152206200	Merged-chr1-152203392-1	E17
Merged-chr8-125073628-2	chr8	125073201	125073800	Merged-chr8-125073755-2	E4
Merged-chr17-14557408-2	chr17	14552601	14562200	Merged-chr17-14557416-2	E17
Merged-chr3-86863734-2	chr3	86863601	86863800	Merged-chr3-86863768-2	E13
Merged-chr5-81519595-2	chr5	81518801	81520400	Merged-chr5-81519589-2	E15
Merged-chr2-179222094-2	chr2	179220001	179226800	Merged-chr2-179220788-2	E17
Merged-chr4-145478692-2	chr4	145478401	145479200	Merged-chr4-145478584-1	E14
Merged-chr9-108567443-2	chr9	108566601	108568800	Merged-chr9-108567185-2	E2
Merged-chr3-121480393-2	chr3	121480001	121480800	Merged-chr3-121480385-2	E3
Merged-chr6-117708003-2	chr6	117707801	117708200	Merged-chr6-117708005-2	E5
Merged-chr2-168545874-2	chr2	168545601	168546200	Merged-chr2-168545848-2	E3
Merged-chr19-10655485-2	chr19	10655201	10655800	Merged-chr19-10655470-2	E3
Merged-chr13-11959723-2	chr13	11959201	11960200	Merged-chr13-11959745-2	E5
Merged-chr13-28959365-2	chr13	28957801	28960000	Merged-chr13-28959829-2	E2
Merged-chr10-125919188-2	chr10	125918801	125919600	Merged-chr10-125919175-2	E5
Merged-chr3-144643777-2	chr3	144643601	144644000	Merged-chr3-144643754-2	E5
Merged-chr9-20202359-2	chr9	20202001	20202800	Merged-chr9-20202318-1	E15
Merged-chr16-14004401-2	chr16	14004201	14004600	Merged-chr16-14004402-2	E3
Merged-chr10-27806435-2	chr10	27800201	27809600	Merged-chr10-27807969-2	E16
Merged-chr4-33198196-2	chr4	33197601	33198600	Merged-chr4-33198291-2	E14
Merged-chr1-135698472-2	chr1	135698201	135698600	Merged-chr1-135698544-2	E3
Merged-chr1-89628544-2	chr1	89627801	89629400	Merged-chr1-89628488-2	E10
Merged-chr7-67466815-2	chr7	67466401	67467800	Merged-chr7-67466529-2	E5
Merged-chr4-53789539-2	chr4	53788801	53790200	Merged-chr4-53789577-2	E14
Merged-chr11-5803779-2	chr11	5803601	5804000	Merged-chr11-5803757-1	E3
Merged-chr1-127244682-2	chr1	127244601	127244800	Merged-chr1-127244663-1	E3
Merged-chr2-162139319-2	chr2	162135401	162142000	Merged-chr2-162139938-1	E17
Merged-chr18-36348772-2	chr18	36348201	36349400	Merged-chr18-36348743-1	E2
Merged-chr5-135456709-2	chr5	135456601	135456800	Merged-chr5-135456717-2	E4
Merged-chr18-81956612-2	chr18	81956401	81956800	Merged-chr18-81956623-2	E5
Merged-chr17-31790792-2	chr17	31790601	31791200	Merged-chr17-31790683-2	E2
Merged-chr7-142251340-2	chr7	142251201	142251400	Merged-chr7-142251380-2	E4
Merged-chr17-35276665-2	chr17	35276601	35276800	Merged-chr17-35276629-2	E4
Merged-chr5-34761687-2	chr5	34760801	34762600	Merged-chr5-34761673-2	E2
Merged-chr4-125946067-2	chr4	125945401	125946600	Merged-chr4-125946133-2	E4
Merged-chr15-9213180-2	chr15	9212201	9214000	Merged-chr15-9213260-2	E14
Merged-chr15-75803173-2	chr15	75802201	75804600	Merged-chr15-75802945-1	E7
Merged-chr11-102394539-2	chr11	102394201	102394800	Merged-chr11-102394578-2	E3
Merged-chr18-42741006-2	chr18	42740601	42741800	Merged-chr18-42740812-2	E15
Merged-chr11-99615721-2	chr11	99614401	99619600	Merged-chr11-99614441-2	E17
Merged-chr15-58223549-2	chr15	58223001	58224400	Merged-chr15-58223397-2	E17
Merged-chr1-168306117-2	chr1	168301801	168309000	Merged-chr1-168306833-2	E17
Merged-chr2-60689131-2	chr2	60689001	60689400	Merged-chr2-60689061-1	E3
Merged-chr3-153384735-2	chr3	153384401	153385000	Merged-chr3-153384769-2	E15
Merged-chr6-86792642-2	chr6	86792201	86792800	Merged-chr6-86792783-1	E1
Merged-chr10-77197684-2	chr10	77196201	77199400	Merged-chr10-77197567-2	E13
Merged-chr3-95163893-2	chr3	95162601	95164600	Merged-chr3-95164186-1	E3
Merged-chr10-82241291-2	chr10	82241001	82241400	Merged-chr10-82241381-2	E2
Merged-chr1-153733486-2	chr1	153733001	153734000	Merged-chr1-153733472-2	E3
Merged-chr17-87919301-2	chr17	87919201	87919400	Merged-chr17-87919301-2	E4
Merged-chr5-100751770-2	chr5	100751401	100752000	Merged-chr5-100751840-2	E4
Merged-chr2-92948179-2	chr2	92948001	92948600	Merged-chr2-92948057-2	E3
Merged-chr12-65073912-2	chr12	65073401	65074400	Merged-chr12-65073923-2	E2
Merged-chr13-55419326-2	chr13	55418601	55420000	Merged-chr13-55419352-1	E1
Merged-chr11-88180358-2	chr11	88179801	88181800	Merged-chr11-88179915-2	E3
Merged-chr11-59161803-2	chr11	59161401	59162600	Merged-chr11-59161606-2	E14
Merged-chr8-13503511-2	chr8	13503001	13504000	Merged-chr8-13503522-2	E17
Merged-chr11-99705989-2	chr11	99701401	99712400	Merged-chr11-99705078-2	E16
Merged-chr8-109569293-2	chr8	109568801	109569800	Merged-chr8-109569285-1	E7
Merged-chr7-87584690-2	chr7	87584601	87584800	Merged-chr7-87584679-2	E3
Merged-chr17-69095985-2	chr17	69093601	69099000	Merged-chr17-69095670-2	E17
Merged-chr1-89011672-2	chr1	89011601	89011800	Merged-chr1-89011643-1	E4
Merged-chr9-95263077-2	chr9	95257401	95265400	Merged-chr9-95264753-2	E17
Merged-chr11-117296406-2	chr11	117295201	117297200	Merged-chr11-117296612-2	E3
Merged-chr9-64496919-2	chr9	64495201	64497600	Merged-chr9-64497438-2	E6
Merged-chr13-48159280-2	chr13	48159201	48159400	Merged-chr13-48159259-2	E13
Merged-chr6-99009997-2	chr6	99009801	99010200	Merged-chr6-99009993-2	E2
Merged-chr18-25506279-2	chr18	25506001	25507000	Merged-chr18-25506057-2	E14
Merged-chr10-79937220-2	chr10	79936801	79937600	Merged-chr10-79937239-2	E3
Merged-chr2-139711750-2	chr2	139711401	139712400	Merged-chr2-139711600-2	E15
Merged-chr6-29673211-2	chr6	29673001	29673400	Merged-chr6-29673221-1	E3
Merged-chr14-32634530-2	chr14	32634201	32634800	Merged-chr14-32634560-2	E3
Merged-chr2-180545676-2	chr2	180545601	180545800	Merged-chr2-180545651-2	E4
Merged-chr18-33889944-2	chr18	33888601	33891400	Merged-chr18-33889887-2	E12
Merged-chr11-72406659-2	chr11	72406401	72407000	Merged-chr11-72406618-2	E14
Merged-chr3-52830034-2	chr3	52823801	52833600	Merged-chr3-52831368-2	E17
Merged-chr9-21337930-2	chr9	21337601	21338600	Merged-chr9-21337759-1	E2
Merged-chr9-62180767-2	chr9	62180601	62181000	Merged-chr9-62180733-2	E4
Merged-chr1-85625055-2	chr1	85625001	85625200	Merged-chr1-85625010-1	E3
Merged-chr10-36484906-2	chr10	36484601	36485400	Merged-chr10-36484812-2	E15
Merged-chr18-81669272-2	chr18	81668801	81669600	Merged-chr18-81669344-2	E5
Merged-chr6-83420621-2	chr6	83416201	83422200	Merged-chr6-83422042-2	E1
Merged-chr19-55271640-2	chr19	55271201	55272000	Merged-chr19-55271679-1	E14
Merged-chr12-111696454-2	chr12	111696401	111696600	Merged-chr12-111696408-2	E4
Merged-chr6-5482294-2	chr6	5482001	5482400	Merged-chr6-5482387-2	E13
Merged-chr3-104439089-2	chr3	104438401	104440000	Merged-chr3-104438977-2	E6
Merged-chr7-127274062-2	chr7	127273201	127274400	Merged-chr7-127274323-1	E2
Merged-chr8-20096997-2	chr8	20096801	20097200	Merged-chr8-20096993-2	E5
Merged-chr9-109367542-2	chr9	109367401	109367800	Merged-chr9-109367484-2	E15
Merged-chr13-46533891-2	chr13	46532601	46534400	Merged-chr13-46534281-2	E6
Merged-chr7-6189754-2	chr7	6189201	6190200	Merged-chr7-6189808-1	E2
Merged-chr8-47979672-2	chr8	47979601	47979800	Merged-chr8-47979643-1	E12
Merged-chr18-46879192-2	chr18	46878801	46879600	Merged-chr18-46879184-2	E4
Merged-chr13-107493338-2	chr13	107492001	107493800	Merged-chr13-107493776-1	E17
Merged-chr7-36792765-2	chr7	36791801	36794800	Merged-chr7-36792230-2	E17
Merged-chr12-25098946-2	chr12	25098201	25100000	Merged-chr12-25098791-2	E2
Merged-chr14-19702480-2	chr14	19701001	19705400	Merged-chr14-19701759-2	E6
Merged-chr8-27204485-2	chr8	27204401	27204600	Merged-chr8-27204470-2	E4
Merged-chr7-52420219-2	chr7	52418001	52422800	Merged-chr7-52420037-2	E16
Merged-chr15-25648474-2	chr15	25647801	25649200	Merged-chr15-25648447-2	E17
Merged-chr2-76347137-2	chr2	76347001	76347200	Merged-chr2-76347174-2	E5
Merged-chr14-120355777-2	chr14	120355601	120356200	Merged-chr14-120355653-1	E14
Merged-chr19-56235680-2	chr19	56233801	56236600	Merged-chr19-56236160-2	E6
Merged-chr18-83289362-2	chr18	83288401	83289800	Merged-chr18-83289623-2	E17
Merged-chr1-85617165-2	chr1	85615401	85617800	Merged-chr1-85617729-2	E18
Merged-chr5-30729055-2	chr5	30728801	30729400	Merged-chr5-30729009-2	E7
Merged-chr6-29879476-2	chr6	29878601	29879800	Merged-chr6-29879752-1	E10
Merged-chr12-108994748-2	chr12	108994601	108994800	Merged-chr12-108994795-1	E4
Merged-chr12-25093062-2	chr12	25092401	25093600	Merged-chr12-25093124-2	E2
Merged-chr10-122033232-2	chr10	122032401	122033600	Merged-chr10-122033464-2	E5
Merged-chr5-129287607-2	chr5	129287401	129287800	Merged-chr5-129287613-1	E15
Merged-chr7-19800731-2	chr7	19800601	19800800	Merged-chr7-19800762-1	E4
Merged-chr7-19270708-2	chr7	19270401	19271000	Merged-chr7-19270716-2	E2
Merged-chr6-112848930-2	chr6	112848601	112849200	Merged-chr6-112848960-2	E5
Merged-chr10-128590096-2	chr10	128589001	128590600	Merged-chr10-128590392-1	E2
Merged-chr12-65206696-2	chr12	65206201	65207400	Merged-chr12-65206591-2	E15
Merged-chr11-78169342-2	chr11	78169201	78169600	Merged-chr11-78169284-2	E2
Merged-chr3-116808048-2	chr3	116807801	116808600	Merged-chr3-116807896-2	E2
Merged-chr16-9281315-2	chr16	9280801	9282400	Merged-chr16-9281029-2	E14
Merged-chr1-53750096-2	chr1	53749801	53750200	Merged-chr1-53750191-1	E14
Merged-chr2-26547872-2	chr2	26547201	26549000	Merged-chr2-26547643-1	E3
Merged-chr17-67996367-2	chr17	67996001	67996800	Merged-chr17-67996333-2	E15
Merged-chr13-49383155-2	chr13	49383001	49383600	Merged-chr13-49383010-2	E2
Merged-chr3-85210222-2	chr3	85210001	85210800	Merged-chr3-85210043-2	E5
Merged-chr5-139076865-2	chr5	139075801	139078000	Merged-chr5-139076829-2	E4
Merged-chr14-24270710-2	chr14	24270601	24271000	Merged-chr14-24270619-2	E3
Merged-chr13-9832474-2	chr13	9826801	9834400	Merged-chr13-9834348-1	E16
Merged-chr11-85658621-2	chr11	85658401	85658800	Merged-chr11-85658642-2	E15
Merged-chr5-110372216-2	chr5	110372001	110372400	Merged-chr5-110372232-2	E7
Merged-chr17-30721386-2	chr17	30719801	30722200	Merged-chr17-30721772-1	E7
Merged-chr1-185351887-2	chr1	185351801	185352000	Merged-chr1-185351873-2	E10
Merged-chr17-27863196-2	chr17	27862601	27863800	Merged-chr17-27863191-2	E10
Merged-chr16-9128009-2	chr16	9127801	9128200	Merged-chr16-9128017-1	E3
Merged-chr6-135040546-2	chr6	135040401	135040800	Merged-chr6-135040491-2	E2
Merged-chr19-16252073-2	chr19	16252001	16252200	Merged-chr19-16252046-2	E7
Merged-chr7-143401675-2	chr7	143401601	143401800	Merged-chr7-143401649-2	E4
Merged-chr2-18392573-2	chr2	18392001	18393000	Merged-chr2-18392646-2	E2
Merged-chr11-78411145-2	chr11	78410001	78411800	Merged-chr11-78411389-2	E6
Merged-chrX-143543447-2	chrX	143542801	143544200	Merged-chrX-143543394-2	E15
Merged-chr11-96956244-2	chr11	96955801	96956600	Merged-chr11-96956287-1	E2
Merged-chr4-140044210-2	chr4	140043801	140044400	Merged-chr4-140044319-2	E2
Merged-chr10-57675339-2	chr10	57672401	57677000	Merged-chr10-57675977-2	E17
Merged-chr6-125413011-2	chr6	125412001	125413800	Merged-chr6-125413121-2	E14
Merged-chr18-43687698-2	chr18	43687401	43687800	Merged-chr18-43687795-2	E2
Merged-chr4-101550627-2	chr4	101550001	101551000	Merged-chr4-101550753-1	E2
Merged-chr9-57148416-2	chr9	57148201	57148600	Merged-chr9-57148432-2	E2
Merged-chr5-117898295-2	chr5	117898201	117898400	Merged-chr5-117898289-2	E3
Merged-chr17-6457822-2	chr17	6457401	6458200	Merged-chr17-6457843-1	E10
Merged-chr7-4847217-2	chr7	4845601	4849400	Merged-chr7-4846933-1	E6
Merged-chr19-56874476-2	chr19	56874001	56875200	Merged-chr19-56874351-2	E2
Merged-chr5-121437080-2	chr5	121436601	121437600	Merged-chr5-121437060-1	E9
Merged-chr7-25582520-2	chr7	25582001	25582800	Merged-chr7-25582639-1	E4
Merged-chr4-149602955-2	chr4	149602601	149603200	Merged-chr4-149603009-1	E14
Merged-chr11-6176940-2	chr11	6174801	6177800	Merged-chr11-6177580-1	E11
Merged-chr16-89974042-2	chr16	89973001	89975200	Merged-chr16-89973984-1	E7
Merged-chr7-133114970-2	chr7	133114601	133115400	Merged-chr7-133114940-2	E2
Merged-chr4-154183378-2	chr4	154182601	154184200	Merged-chr4-154183356-2	E6
Merged-chr4-149724164-2	chr4	149724001	149724600	Merged-chr4-149724028-2	E3
Merged-chr8-47308121-2	chr8	47307401	47309600	Merged-chr8-47307741-1	E14
Merged-chr11-106868749-2	chr11	106867601	106869200	Merged-chr11-106869098-1	E9
Merged-chr18-82591070-2	chr18	82590801	82591400	Merged-chr18-82591039-2	E5
Merged-chr11-94986721-2	chr11	94986601	94986800	Merged-chr11-94986741-2	E14
Merged-chr2-25797723-2	chr2	25797601	25797800	Merged-chr2-25797745-2	E5
Merged-chr11-32718573-2	chr11	32718001	32719000	Merged-chr11-32718646-2	E10
Merged-chr11-99779858-3	chr11	99778801	99780200	Merged-chr11-99780075-1	E17
Merged-chr19-58690852-2	chr19	58683001	58697600	Merged-chr19-58691404-2	E16
Merged-chr3-121736918-2	chr3	121736601	121737800	Merged-chr3-121736635-2	E14
Merged-chr11-114807156-2	chr11	114806601	114807600	Merged-chr11-114807212-2	E14
Merged-chr4-147095313-2	chr4	147095201	147095600	Merged-chr4-147095226-1	E6
Merged-chr7-28503742-2	chr7	28497401	28506000	Merged-chr7-28505783-1	E6
Merged-chr11-98964903-2	chr11	98964801	98965200	Merged-chr11-98964806-2	E2
Merged-chr11-114334064-2	chr11	114332401	114335800	Merged-chr11-114334027-2	E6
Merged-chr18-43663770-2	chr18	43663401	43664400	Merged-chr18-43663640-2	E15
Merged-chr16-88701221-2	chr16	88701001	88701600	Merged-chr16-88701141-2	E15
Merged-chr1-153705136-2	chr1	153705001	153705400	Merged-chr1-153705072-2	E3
Merged-chr5-137934053-2	chr5	137933201	137934400	Merged-chr5-137934306-2	E14
Merged-chr2-167004334-2	chr2	167004201	167004600	Merged-chr2-167004268-2	E13
Merged-chr11-95645470-2	chr11	95645201	95646000	Merged-chr11-95645340-1	E2
Merged-chr8-105471801-2	chr8	105471601	105472000	Merged-chr8-105471801-2	E2
Merged-chr5-150064728-2	chr5	150064401	150065600	Merged-chr5-150064455-1	E14
Merged-chr3-117010393-2	chr3	117010201	117010600	Merged-chr3-117010385-2	E15
Merged-chr5-120424024-2	chr5	120420601	120427000	Merged-chr5-120424248-2	E1
Merged-chr15-100314762-2	chr15	100314601	100315200	Merged-chr15-100314623-2	E7
Merged-chr17-35059892-2	chr17	35058801	35061200	Merged-chr17-35059783-2	E2
Merged-chr11-22372913-2	chr11	22372601	22373200	Merged-chr11-22372926-2	E5
Merged-chr13-94062627-2	chr13	94062401	94063000	Merged-chr13-94062554-2	E3
Merged-chr12-113715444-2	chr12	113715001	113715800	Merged-chr12-113715487-1	E16
Merged-chr1-35767573-2	chr1	35766601	35768600	Merged-chr1-35767546-2	E17
Merged-chr5-134152118-2	chr5	134151801	134152600	Merged-chr5-134152035-2	E8
Merged-chr7-34426741-2	chr7	34425401	34427200	Merged-chr7-34427181-2	E17
Merged-chr3-94386465-2	chr3	94384801	94387400	Merged-chr3-94386830-2	E6
Merged-chr11-52016354-2	chr11	52013601	52023000	Merged-chr11-52014408-2	E6
Merged-chr17-7187220-2	chr17	7187001	7187400	Merged-chr17-7187239-2	E7
Merged-chr7-107708792-2	chr7	107708601	107709200	Merged-chr7-107708683-2	E3
Merged-chr11-99757367-2	chr11	99747601	99763800	Merged-chr11-99759033-2	E17
Merged-chr2-26171030-2	chr2	26170801	26171200	Merged-chr2-26171059-2	E3
Merged-chr11-79593306-2	chr11	79592001	79593800	Merged-chr11-79593711-2	E1
Merged-chr2-31870830-2	chr2	31870601	31871000	Merged-chr2-31870859-2	E4
Merged-chr14-47341646-2	chr14	47341201	47341800	Merged-chr14-47341792-2	E6
Merged-chr5-114465747-2	chr5	114465401	114466000	Merged-chr5-114465793-2	E3
Merged-chr4-45139821-2	chr4	45139401	45140000	Merged-chr4-45139941-2	E4
Merged-chr8-69121685-2	chr8	69121401	69122000	Merged-chr8-69121670-2	E2
Merged-chr7-139347782-2	chr7	139347401	139348800	Merged-chr7-139347464-2	E6
Merged-chr17-13552354-2	chr17	13551801	13553200	Merged-chr17-13552207-1	E3
Merged-chr3-107680639-2	chr3	107675601	107684200	Merged-chr3-107681377-2	E10
Merged-chr16-8431411-2	chr16	8431001	8431600	Merged-chr16-8431522-2	E5
Merged-chr18-60735322-2	chr18	60735201	60735400	Merged-chr18-60735343-2	E3
Merged-chr15-83673312-2	chr15	83672801	83674000	Merged-chr15-83673224-2	E6
Merged-chr17-23660809-2	chr17	23660401	23661200	Merged-chr17-23660818-2	E2
Merged-chr5-92042615-2	chr5	92042201	92043200	Merged-chr5-92042529-2	E2
Merged-chr6-72763854-2	chr6	72763801	72764000	Merged-chr6-72763807-2	E2
Merged-chr7-101373270-2	chr7	101373001	101373600	Merged-chr7-101373240-1	E2
Merged-chr5-120588523-2	chr5	120588001	120588800	Merged-chr5-120588645-1	E2
Merged-chr8-33974211-2	chr8	33974001	33974400	Merged-chr8-33974221-1	E13
Merged-chr4-147118609-2	chr4	147116801	147121600	Merged-chr4-147118017-1	E17
Merged-chr6-140623248-2	chr6	140622601	140624800	Merged-chr6-140622795-2	E2
Merged-chr14-63182937-2	chr14	63182801	63183200	Merged-chr14-63182874-2	E10
Merged-chr15-76013486-2	chr15	76012001	76016000	Merged-chr15-76012971-2	E3
Merged-chr4-138690575-2	chr4	138690201	138690800	Merged-chr4-138690650-2	E3
Merged-chr4-137685005-2	chr4	137684801	137685200	Merged-chr4-137685009-2	E14
Merged-chr5-65467096-2	chr5	65466201	65468000	Merged-chr5-65467092-1	E10
Merged-chr5-52783202-2	chr5	52783001	52783400	Merged-chr5-52783203-2	E2
Merged-chr9-105838247-2	chr9	105836001	105839000	Merged-chr9-105838994-2	E18
Merged-chr18-69206897-2	chr18	69204201	69214800	Merged-chr18-69204293-1	E17
Merged-chr13-12811684-2	chr13	12809201	12814000	Merged-chr13-12811767-1	E17
Merged-chr10-95761929-2	chr10	95761201	95762400	Merged-chr10-95762057-2	E18
Merged-chr13-46534995-2	chr13	46534401	46535200	Merged-chr13-46535189-2	E14
Merged-chr4-129578574-2	chr4	129578001	129579000	Merged-chr4-129578647-1	E4
Merged-chr8-83584967-2	chr8	83584801	83585200	Merged-chr8-83584934-2	E7
Merged-chr7-133202559-2	chr7	133202201	133202800	Merged-chr7-133202618-1	E14
Merged-chr2-177319149-2	chr2	177317201	177321000	Merged-chr2-177319198-1	E11
Merged-chr13-66432237-2	chr13	66431001	66434800	Merged-chr13-66431574-1	E18
Merged-chr13-110603091-2	chr13	110603001	110603200	Merged-chr13-110603081-1	E14
Merged-chr17-64559214-2	chr17	64558401	64559800	Merged-chr17-64559327-2	E14
Merged-chr7-82625585-2	chr7	82625201	82626200	Merged-chr7-82625469-1	E15
Merged-chr11-99880611-2	chr11	99874001	99889400	Merged-chr11-99879521-2	E17
Merged-chr17-31307921-2	chr17	31307801	31308000	Merged-chr17-31307942-2	E13
Merged-chr12-111531898-2	chr12	111531401	111533000	Merged-chr12-111531595-2	E6
Merged-chr9-66856053-2	chr9	66856001	66856200	Merged-chr9-66856005-2	E7
Merged-chr16-50783938-2	chr16	50783401	50784600	Merged-chr16-50783875-2	E15
Merged-chr6-148464395-2	chr6	148461601	148465800	Merged-chr6-148465089-2	E17
Merged-chr12-112164403-2	chr12	112163001	112165400	Merged-chr12-112164605-2	E3
Merged-chr2-79572911-2	chr2	79568201	79584400	Merged-chr2-79569522-2	E16
Merged-chr4-147417064-2	chr4	147416401	147418800	Merged-chr4-147416528-1	E12
Merged-chr2-167578587-2	chr2	167578201	167578800	Merged-chr2-167578673-2	E3
Merged-chr19-47655144-2	chr19	47655001	47655400	Merged-chr19-47655087-2	E3
Merged-chr16-20517024-2	chr16	20516601	20518000	Merged-chr16-20516748-2	E2
Merged-chr3-32238662-2	chr3	32238601	32238800	Merged-chr3-32238624-2	E5
Merged-chr15-80929105-2	chr15	80929001	80929400	Merged-chr15-80929010-2	E2
Merged-chr2-154466835-2	chr2	154464601	154470600	Merged-chr2-154466069-2	E11
Merged-chr10-85327620-2	chr10	85324801	85329400	Merged-chr10-85328140-2	E17
Merged-chr5-111121984-2	chr5	111121601	111122200	Merged-chr5-111122068-2	E6
Merged-chr12-35313438-2	chr12	35313201	35313800	Merged-chr12-35313375-2	E15
Merged-chrX-37163300-2	chrX	37163201	37163400	Merged-chrX-37163299-2	E13
Merged-chr4-143162297-2	chr4	143162201	143162400	Merged-chr4-143162293-2	E3
Merged-chr17-72603289-2	chr17	72603201	72603400	Merged-chr17-72603277-1	E3
Merged-chr11-4494644-2	chr11	4494401	4495000	Merged-chr11-4494588-1	E10
Merged-chr15-45590111-2	chr15	45590001	45590200	Merged-chr15-45590122-1	E13
Merged-chr9-54004556-2	chr9	54001601	54005600	Merged-chr9-54005512-1	E16
Merged-chr9-107709500-2	chr9	107707401	107710600	Merged-chr9-107710000-2	E2
Merged-chr2-178531313-2	chr2	178530801	178531600	Merged-chr2-178531426-2	E5
Merged-chr5-139093727-2	chr5	139093401	139094000	Merged-chr5-139093754-2	E4
Merged-chr11-58135789-2	chr11	58131401	58138800	Merged-chr11-58136478-1	E9
Merged-chr11-115763871-2	chr11	115763801	115764000	Merged-chr11-115763842-1	E3
Merged-chr10-59879845-2	chr10	59879401	59880200	Merged-chr10-59879889-2	E2
Merged-chr8-67931267-2	chr8	67931201	67931400	Merged-chr8-67931233-1	E13
Merged-chr1-92221342-2	chr1	92217201	92223800	Merged-chr1-92222184-2	E17
Merged-chr9-51663033-2	chr9	51659801	51666200	Merged-chr9-51663066-2	E17
Merged-chr5-18688339-2	chr5	18687201	18688800	Merged-chr5-18688677-2	E14
Merged-chr15-83637028-2	chr15	83636601	83637600	Merged-chr15-83636955-2	E3
Merged-chr16-35981669-2	chr16	35981401	35981800	Merged-chr16-35981738-1	E2
Merged-chr9-122097072-2	chr9	122097001	122097200	Merged-chr9-122097043-2	E5
Merged-chr18-70194012-2	chr18	70193801	70194200	Merged-chr18-70194024-2	E15
Merged-chr4-134359145-2	chr4	134359001	134359400	Merged-chr4-134359089-1	E4
Merged-chr8-84725286-2	chr8	84724801	84726600	Merged-chr8-84724871-1	E3
Merged-chr7-19800252-2	chr7	19800201	19800400	Merged-chr7-19800204-2	E4
Merged-chr5-32613094-2	chr5	32612201	32614800	Merged-chr5-32612687-2	E11
Merged-chr4-140103921-2	chr4	140103801	140104200	Merged-chr4-140103841-1	E13
Merged-chr9-65200873-2	chr9	65198201	65201800	Merged-chr9-65201745-1	E14
Merged-chr18-14512365-2	chr18	14512201	14512600	Merged-chr18-14512330-2	E15
Merged-chr17-3082495-2	chr17	3081401	3083000	Merged-chr17-3082790-1	E2
Merged-chr15-88189593-2	chr15	88189401	88189800	Merged-chr15-88189586-2	E5
Merged-chr16-48630406-2	chr16	48629401	48630800	Merged-chr16-48630712-2	E8
Merged-chr5-113217766-2	chr5	113217401	113218000	Merged-chr5-113217832-2	E6
Merged-chr1-171528041-2	chr1	171524801	171531000	Merged-chr1-171528182-1	E14
Merged-chr11-98180418-2	chr11	98179601	98181600	Merged-chr11-98180236-2	E9
Merged-chr18-64405647-2	chr18	64404401	64406800	Merged-chr18-64405693-2	E17
Merged-chr1-182117419-2	chr1	182116001	182121200	Merged-chr1-182116238-2	E6
Merged-chr15-67046662-2	chr15	67046401	67047000	Merged-chr15-67046623-2	E3
Merged-chr5-27009391-2	chr5	27009201	27009600	Merged-chr5-27009382-2	E15
Merged-chr1-128444666-2	chr1	128444601	128444800	Merged-chr1-128444631-2	E3
Merged-chr1-92365718-2	chr1	92364601	92366800	Merged-chr1-92365736-2	E5
Merged-chr10-84528036-2	chr10	84527601	84529200	Merged-chr10-84527671-2	E8
Merged-chr15-76976565-2	chr15	76975001	76977600	Merged-chr15-76976830-2	E14
Merged-chr2-157837746-2	chr2	157837601	157838000	Merged-chr2-157837691-2	E8
Merged-chr14-52258239-2	chr14	52258001	52258800	Merged-chr14-52258077-1	E13
Merged-chr1-12644805-2	chr1	12644601	12645000	Merged-chr1-12644810-2	E14
Merged-chr4-146486936-2	chr4	146486601	146487200	Merged-chr4-146486971-1	E14
Merged-chr9-86574045-2	chr9	86573801	86574200	Merged-chr9-86574089-2	E7
Merged-chr14-68935062-2	chr14	68935001	68935200	Merged-chr14-68935023-2	E5
Merged-chr7-45387422-2	chr7	45384001	45389800	Merged-chr7-45387944-1	E9
Merged-chrX-151653978-2	chrX	151653801	151654200	Merged-chrX-151653955-1	E15
Merged-chr11-29638477-2	chr11	29638401	29638600	Merged-chr11-29638454-2	E3
Merged-chr13-91371107-2	chr13	91370401	91371400	Merged-chr13-91371314-2	E2
Merged-chr7-80746362-2	chr7	80745401	80746800	Merged-chr7-80746624-1	E13
Merged-chr13-69908852-2	chr13	69908601	69909000	Merged-chr13-69908904-1	E5
Merged-chr18-82934447-2	chr18	82933201	82936000	Merged-chr18-82934293-2	E14
Merged-chr14-122416183-2	chr14	122415601	122416400	Merged-chr14-122416365-1	E13
Merged-chr6-136471091-2	chr6	136471001	136471200	Merged-chr6-136471081-2	E2
Merged-chr8-20524677-2	chr8	20524601	20524800	Merged-chr8-20524654-2	E5
Merged-chr11-20585643-2	chr11	20584001	20586600	Merged-chr11-20585985-2	E14
Merged-chr3-121429910-2	chr3	121427401	121431400	Merged-chr3-121430419-2	E12
Merged-chr2-173249962-2	chr2	173249601	173250200	Merged-chr2-173250023-1	E14
Merged-chr10-78399214-2	chr10	78399001	78399400	Merged-chr10-78399228-2	E3
Merged-chr17-15380908-2	chr17	15380401	15381400	Merged-chr17-15380916-2	E2
Merged-chr9-75683916-2	chr9	75683601	75684200	Merged-chr9-75683932-1	E2
Merged-chr8-69134306-2	chr8	69134201	69134600	Merged-chr8-69134211-2	E4
Merged-chr18-81401497-2	chr18	81401401	81401600	Merged-chr18-81401494-2	E14
Merged-chr12-120024510-2	chr12	120021601	120025600	Merged-chr12-120025419-1	E16
Merged-chr2-173155836-2	chr2	173155401	173156000	Merged-chr2-173155971-2	E6
Merged-chr4-13300374-2	chr4	13300001	13300800	Merged-chr4-13300347-2	E15
Merged-chr9-74366192-2	chr9	74366001	74366400	Merged-chr9-74366183-2	E5
Merged-chr2-173732159-2	chr2	173730201	173733200	Merged-chr2-173732618-2	E5
Merged-chr2-6879047-2	chr2	6877001	6884600	Merged-chr2-6877294-2	E16
Merged-chr4-126115943-2	chr4	126115201	126116400	Merged-chr4-126116085-2	E7
Merged-chr11-117986097-2	chr11	117985801	117986200	Merged-chr11-117986194-2	E4
Merged-chr10-67019145-2	chr10	67019001	67019200	Merged-chr10-67019189-2	E8
Merged-chr10-77835899-2	chr10	77835001	77836400	Merged-chr10-77836098-2	E4
Merged-chr10-128910168-2	chr10	128909401	128911600	Merged-chr10-128909836-2	E2
Merged-chr13-46418520-2	chr13	46418001	46419400	Merged-chr13-46418340-2	E2
Merged-chr3-121195283-2	chr3	121195201	121195400	Merged-chr3-121195265-2	E5
Merged-chr16-4602633-2	chr16	4602201	4603600	Merged-chr16-4602365-1	E2
Merged-chr7-90379390-2	chr7	90371401	90383800	Merged-chr7-90381180-1	E17
Merged-chr7-120882885-2	chr7	120882601	120883200	Merged-chr7-120882870-2	E7
Merged-chr17-13306097-2	chr17	13305801	13306400	Merged-chr17-13306093-1	E3
Merged-chr4-130283076-2	chr4	130283001	130283200	Merged-chr4-130283052-2	E4
Merged-chr18-68660273-2	chr18	68656801	68664200	Merged-chr18-68660045-2	E17
Merged-chr7-47027168-2	chr7	47025801	47028600	Merged-chr7-47027136-2	E6
Merged-chr10-76426655-2	chr10	76426601	76426800	Merged-chr10-76426609-2	E8
Merged-chr5-107394618-2	chr5	107394401	107394800	Merged-chr5-107394635-2	E5
Merged-chr9-108603940-2	chr9	108603401	108604200	Merged-chr9-108604079-1	E9
Merged-chr6-132464138-2	chr6	132463401	132465600	Merged-chr6-132463776-2	E16
Merged-chr16-16912103-2	chr16	16911801	16912400	Merged-chr16-16912106-2	E2
Merged-chr14-21312108-2	chr14	21311801	21312400	Merged-chr14-21312116-2	E3
Merged-chr7-75455532-2	chr7	75455201	75456200	Merged-chr7-75455363-2	E2
Merged-chr8-126000307-2	chr8	125999601	126001200	Merged-chr8-126000214-2	E14
Merged-chr5-147076947-2	chr5	147076001	147078000	Merged-chr5-147076893-2	E2
Merged-chr7-67385635-2	chr7	67385401	67385800	Merged-chr7-67385670-2	E5
Merged-chr9-121685105-2	chr9	121684801	121685600	Merged-chr9-121685010-2	E6
Merged-chr15-97074576-2	chr15	97074001	97074800	Merged-chr15-97074752-2	E14
Merged-chr6-90568463-2	chr6	90568401	90568600	Merged-chr6-90568425-2	E4
Merged-chr2-179193883-2	chr2	179193401	179194400	Merged-chr2-179193866-1	E15
Merged-chr8-125471475-2	chr8	125471201	125471600	Merged-chr8-125471549-2	E3
Merged-chr1-189142470-2	chr1	189141601	189142800	Merged-chr1-189142739-2	E15
Merged-chr10-62867034-2	chr10	62866801	62867600	Merged-chr10-62866867-2	E11
Merged-chr11-77462643-2	chr11	77462201	77463200	Merged-chr11-77462586-1	E2
Merged-chr4-48812752-2	chr4	48811601	48813800	Merged-chr4-48812803-2	E17
Merged-chr7-113193060-2	chr7	113192801	113193600	Merged-chr7-113192919-2	E14
Merged-chr1-120104105-2	chr1	120104001	120104400	Merged-chr1-120104009-2	E4
Merged-chr5-107388330-2	chr5	107385601	107394400	Merged-chr5-107386659-2	E16
Merged-chr8-84995847-2	chr8	84995601	84996200	Merged-chr8-84995794-2	E2
Merged-chr6-148057743-2	chr6	148055201	148058600	Merged-chr6-148058585-1	E16
Merged-chr15-82147823-2	chr15	82147201	82148200	Merged-chr15-82147946-2	E2
Merged-chr16-93308586-2	chr16	93306801	93309200	Merged-chr16-93309172-2	E6
Merged-chr9-12930481-2	chr9	12930201	12930800	Merged-chr9-12930462-2	E15
Merged-chr6-36691693-2	chr6	36691401	36691800	Merged-chr6-36691786-2	E15
Merged-chr8-84351125-2	chr8	84350601	84351600	Merged-chr8-84351150-2	E4
Merged-chr6-147788309-2	chr6	147788201	147788400	Merged-chr6-147788318-2	E5
Merged-chr11-116853479-2	chr11	116852401	116854000	Merged-chr11-116853757-1	E2
Merged-chr17-25294323-2	chr17	25294201	25294400	Merged-chr17-25294346-2	E4
Merged-chr11-60941844-2	chr11	60941401	60942800	Merged-chr11-60941587-2	E8
Merged-chr7-27258231-2	chr7	27257001	27260000	Merged-chr7-27257962-2	E2
Merged-chr3-122000056-2	chr3	121999401	122000800	Merged-chr3-122000011-2	E14
Merged-chr11-13010648-2	chr11	13010001	13012000	Merged-chr11-13010295-2	E18
Merged-chr1-63114054-2	chr1	63112801	63114800	Merged-chr1-63114307-2	E2
Merged-chr16-94972515-2	chr16	94971801	94973000	Merged-chr16-94972629-1	E15
Merged-chr11-99851276-2	chr11	99851001	99851400	Merged-chr11-99851351-2	E5
Merged-chr4-138444894-2	chr4	138444801	138445000	Merged-chr4-138444887-1	E2
Merged-chr4-45473555-2	chr4	45473401	45474000	Merged-chr4-45473409-2	E7
Merged-chr14-24156106-2	chr14	24156001	24156400	Merged-chr14-24156012-2	E10
Merged-chr5-37372947-2	chr5	37372801	37373000	Merged-chr5-37372993-2	E8
Merged-chr11-77489217-2	chr11	77488801	77490400	Merged-chr11-77488833-1	E2
Merged-chr4-59778914-2	chr4	59776401	59779800	Merged-chr4-59779727-1	E11
Merged-chr12-3806590-2	chr12	3806201	3807400	Merged-chr12-3806379-1	E2
Merged-chr4-136178064-2	chr4	136177801	136178600	Merged-chr4-136177928-1	E2
Merged-chr11-71513108-2	chr11	71513001	71513200	Merged-chr11-71513115-2	E3
Merged-chr7-120327542-2	chr7	120327401	120327800	Merged-chr7-120327484-2	E13
Merged-chr5-72444099-2	chr5	72443801	72444400	Merged-chr5-72444098-1	E15
Merged-chr14-7774090-2	chr14	7774001	7774200	Merged-chr14-7774079-2	E2
Merged-chr4-105224084-2	chr4	105223201	105225000	Merged-chr4-105224067-2	E13
Merged-chr8-84223481-2	chr8	84223401	84223600	Merged-chr8-84223461-2	E13
Merged-chr3-132951259-2	chr3	132950801	132951600	Merged-chr3-132951318-1	E1
Merged-chr14-121542043-2	chr14	121538601	121543400	Merged-chr14-121543085-2	E17
Merged-chr7-124804904-2	chr7	124804601	124805200	Merged-chr7-124804907-1	E15
Merged-chr14-61648766-2	chr14	61648001	61649400	Merged-chr14-61648831-1	E2
Merged-chr3-33142989-2	chr3	33142401	33143600	Merged-chr3-33142978-2	E2
Merged-chr7-29469795-2	chr7	29469001	29471200	Merged-chr7-29469490-2	E7
Merged-chr13-37681082-2	chr13	37680801	37681400	Merged-chr13-37681064-2	E15
Merged-chr9-67421681-2	chr9	67420201	67422600	Merged-chr9-67421961-1	E10
Merged-chr16-30726165-2	chr16	30725801	30726400	Merged-chr16-30726229-2	E6
Merged-chr3-89436471-2	chr3	89436201	89436800	Merged-chr3-89436442-1	E13
Merged-chr6-5819889-2	chr6	5819801	5820000	Merged-chr6-5819878-2	E5
Merged-chr8-94147531-2	chr8	94145601	94148200	Merged-chr8-94148161-1	E6
Merged-chr11-26112646-2	chr11	26108801	26117000	Merged-chr11-26112391-1	E17
Merged-chr2-26497564-2	chr2	26497001	26498600	Merged-chr2-26497328-2	E8
Merged-chr7-77204492-2	chr7	77186401	77226800	Merged-chr7-77202383-2	E16
Merged-chr14-74883009-2	chr14	74882401	74883600	Merged-chr14-74883018-2	E14
Merged-chr16-76320882-2	chr16	76319401	76324000	Merged-chr16-76320064-2	E14
Merged-chr6-36762539-2	chr6	36762401	36762800	Merged-chr6-36762477-2	E15
Merged-chr16-65815338-2	chr16	65814801	65816000	Merged-chr16-65815275-2	E2
Merged-chr7-7298769-2	chr7	7298001	7299400	Merged-chr7-7298837-1	E2
Merged-chr8-3395318-2	chr8	3394801	3395800	Merged-chr8-3395336-2	E13
Merged-chr18-6280893-2	chr18	6280401	6281600	Merged-chr18-6280786-2	E13
Merged-chr8-56298432-2	chr8	56296201	56299600	Merged-chr8-56298964-2	E6
Merged-chr9-114569046-2	chr9	114568601	114569200	Merged-chr9-114569191-2	E13
Merged-chr5-12847386-2	chr5	12847001	12848000	Merged-chr5-12847271-2	E14
Merged-chr1-11418352-2	chr1	11416601	11423600	Merged-chr1-11416604-2	E16
Merged-chr10-52029607-2	chr10	52028001	52031200	Merged-chr10-52029613-2	E1
Merged-chr9-67677125-2	chr9	67677001	67677200	Merged-chr9-67677150-2	E5
Merged-chr7-29382151-2	chr7	29381401	29383000	Merged-chr7-29382101-2	E8
Merged-chr11-87422630-2	chr11	87421801	87423000	Merged-chr11-87422859-1	E13
Merged-chr11-116123604-2	chr11	116120601	116125600	Merged-chr11-116124107-2	E6
Merged-chr9-65905379-2	chr9	65902401	65906400	Merged-chr9-65906357-2	E9
Merged-chr8-18937728-2	chr8	18936801	18938400	Merged-chr8-18937856-2	E8
Merged-chr17-66579332-2	chr17	66579201	66579400	Merged-chr17-66579363-2	E3
Merged-chr15-98863302-2	chr15	98862801	98864200	Merged-chr15-98863103-2	E8
Merged-chr17-88708057-2	chr17	88708001	88708200	Merged-chr17-88708013-2	E6
Merged-chr1-89998887-2	chr1	89998801	89999000	Merged-chr1-89998874-2	E4
Merged-chr9-107279831-2	chr9	107279601	107280200	Merged-chr9-107279762-2	E2
Merged-chr4-136174859-2	chr4	136174601	136175600	Merged-chr4-136174618-2	E3
Merged-chr13-49188060-2	chr13	49187001	49188800	Merged-chr13-49188219-1	E2
Merged-chr9-62820815-2	chr9	62818601	62822600	Merged-chr9-62821029-2	E14
Merged-chr4-146168144-2	chr4	146167201	146168600	Merged-chr4-146168388-1	E18
Merged-chr4-133752434-2	chr4	133750001	133754400	Merged-chr4-133752668-2	E12
Merged-chr1-190448360-2	chr1	190448001	190448600	Merged-chr1-190448419-2	E3
Merged-chr2-58532560-2	chr2	58532201	58533200	Merged-chr2-58532420-2	E14
Merged-chr8-109957289-2	chr8	109957001	109957400	Merged-chr8-109957378-1	E13
Merged-chr6-87074617-2	chr6	87071001	87077000	Merged-chr6-87075234-2	E10
Merged-chr4-7857469-2	chr4	7849001	7867200	Merged-chr4-7856838-1	E16
Merged-chr18-66861737-2	chr18	66861601	66861800	Merged-chr18-66861773-2	E15
Merged-chr4-134973407-2	chr4	134972201	134975400	Merged-chr4-134973014-2	E6
Merged-chr6-60745810-2	chr6	60745601	60746200	Merged-chr6-60745720-1	E15
Merged-chr8-125271581-2	chr8	125271201	125272000	Merged-chr8-125271561-2	E4
Merged-chr14-29753837-2	chr14	29739401	29759400	Merged-chr14-29758273-2	E16
Merged-chr1-163537704-2	chr1	163536401	163539400	Merged-chr1-163537508-2	E16
Merged-chr10-69208360-2	chr10	69208001	69208600	Merged-chr10-69208419-1	E4
Merged-chr5-91876155-2	chr5	91876001	91876600	Merged-chr5-91876009-1	E15
Merged-chr2-6547328-2	chr2	6547201	6547400	Merged-chr2-6547356-1	E3
Merged-chr15-39198140-2	chr15	39196601	39199400	Merged-chr15-39198279-2	E2
Merged-chr3-55227007-2	chr3	55226801	55227200	Merged-chr3-55227013-2	E3
Merged-chr7-28203339-2	chr7	28203201	28203400	Merged-chr7-28203378-2	E3
Merged-chr11-99658625-2	chr11	99658401	99658800	Merged-chr11-99658650-2	E3
Merged-chr19-43707644-2	chr19	43706201	43708800	Merged-chr19-43707787-2	E6
Merged-chr11-101334445-2	chr11	101333601	101334800	Merged-chr11-101334689-2	E2
Merged-chr16-10289304-2	chr16	10289001	10289800	Merged-chr16-10289207-2	E4
Merged-chr17-66335608-2	chr17	66334801	66336000	Merged-chr17-66335816-2	E7
Merged-chr2-166215370-2	chr2	166215201	166215600	Merged-chr2-166215339-2	E4
Merged-chr15-99891657-2	chr15	99891201	99892400	Merged-chr15-99891513-1	E6
Merged-chr4-139689205-2	chr4	139688401	139690800	Merged-chr4-139688809-2	E4
Merged-chr11-72275738-2	chr11	72273801	72280800	Merged-chr11-72274176-2	E17
Merged-chr14-6932802-2	chr14	6932601	6933000	Merged-chr14-6932803-1	E5
Merged-chr5-101085953-2	chr5	101084801	101088200	Merged-chr5-101085406-2	E17
Merged-chr6-70964132-2	chr6	70963401	70964800	Merged-chr6-70964163-2	E13
Merged-chr4-45525317-2	chr4	45523601	45528000	Merged-chr4-45524834-1	E11
Merged-chr4-131912983-2	chr4	131911401	131915000	Merged-chr4-131912766-2	E1
Merged-chr4-146741961-2	chr4	146741201	146742800	Merged-chr4-146741921-2	E6
Merged-chr11-99583328-2	chr11	99582801	99583600	Merged-chr11-99583455-2	E5
Merged-chr12-80612051-2	chr12	80610801	80612600	Merged-chr12-80612402-1	E6
Merged-chr6-54409387-2	chr6	54409201	54409600	Merged-chr6-54409374-1	E4
Merged-chr16-38248975-2	chr16	38248801	38249400	Merged-chr16-38248850-2	E3
Merged-chrY-90811307-2	chrY	90810401	90813200	Merged-chrY-90810813-1	E12
Merged-chr17-87670182-2	chr17	87668601	87671600	Merged-chr17-87670263-1	E10
Merged-chr12-85456827-2	chr12	85456201	85457200	Merged-chr12-85456953-1	E6
Merged-chr1-55363509-2	chr1	55362401	55364000	Merged-chr1-55363818-2	E2
Merged-chr14-79769878-2	chr14	79768201	79771600	Merged-chr14-79769855-1	E2
Merged-chr11-69460113-2	chr11	69460001	69460400	Merged-chr11-69460026-2	E4
Merged-chr1-194032783-2	chr1	194032601	194033000	Merged-chr1-194032766-2	E15
Merged-chr11-117404111-2	chr11	117403801	117404600	Merged-chr11-117404022-2	E3
Merged-chr17-29439352-2	chr17	29438601	29441600	Merged-chr17-29438603-2	E14
Merged-chr19-61224763-2	chr19	61224601	61225000	Merged-chr19-61224726-2	E3
Merged-chr11-77965576-2	chr11	77964401	77966600	Merged-chr11-77965651-1	E3
Merged-chr8-22896987-2	chr8	22895001	22897800	Merged-chr8-22897573-1	E10
Merged-chr3-62536341-2	chr3	62535201	62537600	Merged-chr3-62536281-2	E17
Merged-chr1-152300548-2	chr1	152299201	152304400	Merged-chr1-152299295-1	E17
Merged-chr7-62419523-2	chr7	62419001	62420200	Merged-chr7-62419445-2	E2
Merged-chr11-103003456-2	chr11	103003201	103003800	Merged-chr11-103003412-2	E3
Merged-chr1-35995878-2	chr1	35995401	35996200	Merged-chr1-35995956-2	E4
Merged-chr17-16862615-2	chr17	16859001	16865600	Merged-chr17-16862930-1	E16
Merged-chr12-71113264-2	chr12	71112801	71114000	Merged-chr12-71113127-1	E14
Merged-chr15-12224471-2	chr15	12224001	12225000	Merged-chr15-12224441-2	E10
Merged-chr4-45490125-2	chr4	45489801	45490400	Merged-chr4-45490150-2	E13
Merged-chr17-47418712-2	chr17	47418601	47418800	Merged-chr17-47418723-2	E4
Merged-chr18-20802091-2	chr18	20802001	20802200	Merged-chr18-20802081-1	E3
Merged-chr7-132996571-2	chr7	132996201	132996800	Merged-chr7-132996641-2	E8
Merged-chr4-11056094-2	chr4	11056001	11056200	Merged-chr4-11056088-2	E7
Merged-chr8-123515463-2	chr8	123515401	123515600	Merged-chr8-123515425-2	E3
Merged-chr14-64950221-2	chr14	64949801	64951200	Merged-chr14-64949942-1	E13
Merged-chr9-61293341-2	chr9	61293201	61293400	Merged-chr9-61293381-2	E2
Merged-chr11-99846987-2	chr11	99846801	99847200	Merged-chr11-99846974-2	E5
Merged-chr2-78189786-2	chr2	78189601	78190000	Merged-chr2-78189772-2	E15
Merged-chr3-7805253-2	chr3	7804801	7805600	Merged-chr3-7805306-1	E15
Merged-chr14-25747747-2	chr14	25747001	25748400	Merged-chr14-25747794-1	E3
Merged-chr6-84901555-2	chr6	84894001	84916400	Merged-chr6-84897909-2	E17
Merged-chr1-84869229-2	chr1	84868401	84870400	Merged-chr1-84869057-2	E13
Merged-chr11-107135695-2	chr11	107134801	107136000	Merged-chr11-107135990-2	E14
Merged-chr2-166887997-2	chr2	166887801	166888200	Merged-chr2-166887994-2	E7
Merged-chr10-41404470-2	chr10	41404401	41404600	Merged-chr10-41404439-2	E4
Merged-chr17-47511559-2	chr17	47511201	47512200	Merged-chr17-47511418-1	E2
Merged-chr11-74619291-2	chr11	74619201	74619400	Merged-chr11-74619281-1	E2
Merged-chr10-130259645-2	chr10	130259401	130260000	Merged-chr10-130259590-2	E15
Merged-chr1-175512345-2	chr1	175512001	175512600	Merged-chr1-175512389-2	E15
Merged-chr10-83841302-2	chr10	83828401	83847000	Merged-chr10-83844903-2	E17
Merged-chr16-93961330-2	chr16	93961001	93961600	Merged-chr16-93961360-2	E3
Merged-chr9-119150033-2	chr9	119149401	119151000	Merged-chr9-119149866-1	E4
Merged-chr9-98726730-2	chr9	98726601	98726800	Merged-chr9-98726760-1	E5
Merged-chr6-118429804-2	chr6	118421201	118434600	Merged-chr6-118431708-2	E17
Merged-chr4-15011121-2	chr4	15010801	15011800	Merged-chr4-15010941-2	E16
Merged-chr1-186749453-2	chr1	186749401	186749600	Merged-chr1-186749405-2	E2
Merged-chr8-36480463-2	chr8	36480201	36480800	Merged-chr8-36480426-2	E13
Merged-chr4-34872969-2	chr4	34872401	34873200	Merged-chr4-34873137-2	E12
Merged-chr17-69439395-2	chr17	69438801	69440200	Merged-chr17-69439290-1	E2
Merged-chr12-101000220-2	chr12	100999001	101002800	Merged-chr12-100999539-2	E11
Merged-chr18-37826338-2	chr18	37826001	37826600	Merged-chr18-37826376-2	E13
Merged-chr10-41272313-2	chr10	41269201	41273600	Merged-chr10-41273226-1	E10
Merged-chr10-70060204-2	chr10	70060001	70060400	Merged-chr10-70060207-2	E3
Merged-chr11-104536936-2	chr11	104536801	104537000	Merged-chr11-104536971-1	E7
Merged-chr10-7149692-2	chr10	7149001	7150000	Merged-chr10-7149883-2	E10
Merged-chr3-118500337-2	chr3	118500201	118500600	Merged-chr3-118500273-2	E15
Merged-chr17-32211377-2	chr17	32210001	32212400	Merged-chr17-32211554-2	E9
Merged-chr5-81654181-2	chr5	81653801	81654600	Merged-chr5-81654162-2	E15
Merged-chr13-57046311-2	chr13	57046201	57046400	Merged-chr13-57046322-2	E3
Merged-chr18-32138800-2	chr18	32138601	32139200	Merged-chr18-32138699-1	E3
Merged-chr4-117317760-2	chr4	117317001	117318200	Merged-chr4-117317920-2	E2
Merged-chr6-88976652-2	chr6	88976001	88977200	Merged-chr6-88976704-2	E3
Merged-chr1-63507093-2	chr1	63503001	63509400	Merged-chr1-63507985-2	E9
Merged-chr11-60494596-2	chr11	60494001	60495400	Merged-chr11-60494491-2	E3
Merged-chr7-142257717-2	chr7	142257601	142257800	Merged-chr7-142257734-2	E5
Merged-chr10-25534080-2	chr10	25534001	25534200	Merged-chr10-25534060-2	E5
Merged-chr7-51300435-2	chr7	51300201	51300800	Merged-chr7-51300369-2	E15
Merged-chr15-84791144-2	chr15	84791001	84791400	Merged-chr15-84791088-2	E4
Merged-chr6-88981723-2	chr6	88981601	88981800	Merged-chr6-88981746-2	E3
Merged-chr18-77488805-2	chr18	77488601	77489000	Merged-chr18-77488809-1	E4
Merged-chr11-84333065-2	chr11	84333001	84333200	Merged-chr11-84333030-2	E7
Merged-chr18-24259103-2	chr18	24259001	24259200	Merged-chr18-24259105-2	E7
Merged-chr2-16683104-2	chr2	16683001	16683200	Merged-chr2-16683108-2	E14
Merged-chr4-5690462-2	chr4	5689801	5690800	Merged-chr4-5690624-2	E7
Merged-chr2-34920457-2	chr2	34920201	34920800	Merged-chr2-34920413-2	E3
Merged-chr5-116280611-2	chr5	116280401	116280800	Merged-chr5-116280621-2	E4
Merged-chr5-115983520-2	chr5	115982601	115984800	Merged-chr5-115983339-2	E9
Merged-chr1-180210883-2	chr1	180210801	180211000	Merged-chr1-180210865-2	E3
Merged-chr13-40667949-2	chr13	40661801	40670000	Merged-chr13-40669998-2	E17
Merged-chr17-30796534-2	chr17	30795801	30798000	Merged-chr17-30796167-2	E7
Merged-chr5-92687122-2	chr5	92685201	92688800	Merged-chr5-92687244-1	E6
Merged-chr9-106212737-2	chr9	106212601	106212800	Merged-chr9-106212774-1	E2
Merged-chr3-135438495-2	chr3	135437801	135439400	Merged-chr3-135438389-2	E2
Merged-chr14-69965702-2	chr14	69965201	69966200	Merged-chr14-69965703-1	E3
Merged-chr13-53167355-2	chr13	53167201	53167600	Merged-chr13-53167309-2	E10
Merged-chr7-85104846-2	chr7	85102201	85107800	Merged-chr7-85104691-2	E18
Merged-chr10-125906628-2	chr10	125906401	125906800	Merged-chr10-125906656-2	E5
Merged-chr7-122015320-2	chr7	122014601	122015800	Merged-chr7-122015440-2	E12
Merged-chr2-155696120-2	chr2	155696001	155696200	Merged-chr2-155696140-1	E14
Merged-chr13-23402196-2	chr13	23401601	23402600	Merged-chr13-23402291-1	E2
Merged-chr1-36251621-2	chr1	36251401	36251800	Merged-chr1-36251642-2	E3
Merged-chr1-74106555-2	chr1	74106201	74107200	Merged-chr1-74106409-2	E3
Merged-chr13-49020415-2	chr13	49020201	49020600	Merged-chr13-49020430-2	E3
Merged-chr7-45216760-2	chr7	45215801	45217400	Merged-chr7-45216919-1	E2
Merged-chr11-120269682-2	chr11	120269201	120270200	Merged-chr11-120269663-1	E8
Merged-chr11-61081624-2	chr11	61080601	61082400	Merged-chr11-61081748-2	E6
Merged-chr15-76644394-2	chr15	76643801	76645400	Merged-chr15-76644187-1	E7
Merged-chr17-23603586-2	chr17	23601601	23605400	Merged-chr17-23603672-1	E12
Merged-chr1-180777760-2	chr1	180777401	180778600	Merged-chr1-180777520-1	E2
Merged-chr8-122460722-2	chr8	122460001	122461400	Merged-chr8-122460744-2	E2
Merged-chr1-136707569-2	chr1	136707201	136708200	Merged-chr1-136707438-2	E2
Merged-chr5-123315409-2	chr5	123315201	123315600	Merged-chr5-123315418-2	E3
Merged-chr17-31570491-2	chr17	31570401	31570600	Merged-chr17-31570482-1	E2
Merged-chr6-121096375-2	chr6	121095601	121097400	Merged-chr6-121096249-2	E4
Merged-chr12-29096146-2	chr12	29096001	29096200	Merged-chr12-29096192-2	E14
Merged-chr15-27937934-2	chr15	27937801	27938000	Merged-chr15-27937968-1	E13
Merged-chr19-24224902-2	chr19	24224001	24225400	Merged-chr19-24225103-2	E2
Merged-chr12-39865414-2	chr12	39861001	39870000	Merged-chr12-39865328-1	E16
Merged-chr4-59945108-2	chr4	59942801	59947200	Merged-chr4-59945215-2	E17
Merged-chr14-105427595-2	chr14	105427201	105428000	Merged-chr14-105427589-1	E14
Merged-chr11-19836285-2	chr11	19836001	19836600	Merged-chr11-19836269-1	E3
Merged-chr3-98024500-2	chr3	98024401	98024600	Merged-chr3-98024500-2	E2
Merged-chr5-127978729-2	chr5	127978601	127978800	Merged-chr5-127978758-2	E5
Merged-chr15-34829551-2	chr15	34829401	34829800	Merged-chr15-34829502-1	E5
Merged-chr2-154428041-2	chr2	154427801	154428400	Merged-chr2-154427982-2	E2
Merged-chr8-116852079-2	chr8	116851201	116852400	Merged-chr8-116852358-1	E4
Merged-chr4-153806392-2	chr4	153805801	153807000	Merged-chr4-153806383-1	E3
Merged-chr18-18058806-2	chr18	18058601	18059000	Merged-chr18-18058812-2	E15
Merged-chr9-37053346-2	chr9	37053001	37054000	Merged-chr9-37053191-2	E13
Merged-chr11-80512456-2	chr11	80512001	80512800	Merged-chr11-80512511-2	E4
Merged-chr6-117662348-2	chr6	117661001	117662800	Merged-chr6-117662796-2	E17
Merged-chr10-44730941-2	chr10	44730801	44731200	Merged-chr10-44730881-2	E15
Merged-chr18-80104938-2	chr18	80104601	80105400	Merged-chr18-80104875-2	E3
Merged-chr10-20297626-2	chr10	20297201	20298000	Merged-chr10-20297652-2	E6
Merged-chr11-117451776-2	chr11	117451601	117452000	Merged-chr11-117451752-2	E4
Merged-chr15-101553363-2	chr15	101553001	101553600	Merged-chr15-101553426-2	E3
Merged-chr7-128058573-2	chr7	128057801	128059000	Merged-chr7-128058746-2	E4
Merged-chr5-114166102-2	chr5	114165001	114166600	Merged-chr5-114166403-2	E4
Merged-chr4-133896571-2	chr4	133896001	133897000	Merged-chr4-133896641-2	E14
Merged-chr9-96469876-2	chr9	96469601	96470000	Merged-chr9-96469951-2	E10
Merged-chr17-14203479-2	chr17	14203001	14204000	Merged-chr17-14203457-1	E2
Merged-chr17-29854980-2	chr17	29854401	29855400	Merged-chr17-29855059-2	E14
Merged-chr7-127992930-2	chr7	127992001	127993400	Merged-chr7-127993159-2	E12
Merged-chr8-127264606-2	chr8	127264201	127265400	Merged-chr8-127264412-2	E7
Merged-chr15-98114742-2	chr15	98114001	98115600	Merged-chr15-98114684-2	E13
Merged-chr11-99699659-2	chr11	99699601	99699800	Merged-chr11-99699617-2	E5
Merged-chr16-95093864-2	chr16	95093601	95094000	Merged-chr16-95093927-1	E15
Merged-chr1-12814760-2	chr1	12814401	12815400	Merged-chr1-12814620-2	E14
Merged-chr4-141246861-2	chr4	141246801	141247000	Merged-chr4-141246821-2	E3
Merged-chr19-47222811-2	chr19	47222201	47223600	Merged-chr19-47222721-2	E3
Merged-chrX-111697023-2	chrX	111696601	111697200	Merged-chrX-111697145-1	E13
Merged-chr4-46378792-2	chr4	46377201	46380000	Merged-chr4-46378984-2	E9
Merged-chr10-77139168-2	chr10	77138201	77139600	Merged-chr10-77139436-1	E8
Merged-chr4-141398169-2	chr4	141396001	141399200	Merged-chr4-141398737-2	E4
Merged-chr10-81564871-2	chr10	81564201	81565200	Merged-chr10-81565042-1	E2
Merged-chr12-80216671-2	chr12	80216201	80217200	Merged-chr12-80216642-2	E12
Merged-chr11-80178304-2	chr11	80178201	80178600	Merged-chr11-80178208-2	E2
Merged-chr14-38509872-2	chr14	38505201	38513800	Merged-chr14-38510244-2	E16
Merged-chr8-13916657-2	chr8	13916401	13917000	Merged-chr8-13916614-2	E3
Merged-chr15-85235679-2	chr15	85234801	85236600	Merged-chr15-85235658-2	E10
Merged-chr16-20523192-2	chr16	20523001	20523400	Merged-chr16-20523183-1	E7
Merged-chr2-165563558-2	chr2	165563201	165564000	Merged-chr2-165563516-2	E2
Merged-chr4-145556877-2	chr4	145556801	145557000	Merged-chr4-145556854-2	E3
Merged-chr15-12136529-2	chr15	12136401	12136600	Merged-chr15-12136557-2	E8
Merged-chr8-20436123-2	chr8	20435801	20436800	Merged-chr8-20435945-1	E17
Merged-chr2-118534199-2	chr2	118533801	118534400	Merged-chr2-118534297-2	E4
Merged-chr4-151295699-2	chr4	151295601	151295800	Merged-chr4-151295697-1	E4
Merged-chr1-127989492-2	chr1	127988601	127990000	Merged-chr1-127989683-2	E10
Merged-chr14-120883110-2	chr14	120882601	120884600	Merged-chr14-120882619-2	E6
Merged-chr5-32742444-2	chr5	32741801	32743000	Merged-chr5-32742488-2	E8
Merged-chr8-105471116-2	chr8	105471001	105471400	Merged-chr8-105471031-2	E2
Merged-chr17-79355614-2	chr17	79354201	79356400	Merged-chr17-79355928-2	E2
Merged-chr10-71292491-2	chr10	71292401	71292600	Merged-chr10-71292481-2	E3
Merged-chr1-188683046-2	chr1	188682201	188685400	Merged-chr1-188682292-2	E17
Merged-chr2-33616841-2	chr2	33615801	33617200	Merged-chr2-33617182-2	E2
Merged-chr2-30942982-2	chr2	30942801	30943200	Merged-chr2-30942964-2	E14
Merged-chr4-55203864-2	chr4	55203601	55204000	Merged-chr4-55203928-2	E3
Merged-chr1-181852975-2	chr1	181852401	181853200	Merged-chr1-181853149-1	E13
Merged-chr7-19291361-2	chr7	19291001	19291600	Merged-chr7-19291422-1	E2
Merged-chr11-85969701-2	chr11	85967201	85972400	Merged-chr11-85969602-2	E17
Merged-chr1-154759465-2	chr1	154749201	154770600	Merged-chr1-154759030-2	E17
Merged-chr5-131764271-2	chr5	131761401	131767200	Merged-chr5-131764241-2	E17
Merged-chr8-20383935-2	chr8	20379601	20387400	Merged-chr8-20384370-1	E16
Merged-chr2-121101565-2	chr2	121101201	121101800	Merged-chr2-121101629-2	E5
Merged-chr6-60742974-2	chr6	60742801	60743200	Merged-chr6-60742947-2	E15
Merged-chr7-80525713-2	chr7	80521201	80533800	Merged-chr7-80523925-1	E11
Merged-chr8-26892058-2	chr8	26891401	26892600	Merged-chr8-26892115-1	E4
Merged-chr8-46584526-2	chr8	46584401	46584600	Merged-chr8-46584552-2	E15
Merged-chr12-112326119-2	chr12	112325601	112327200	Merged-chr12-112325837-2	E6
Merged-chr7-82766773-2	chr7	82766401	82767000	Merged-chr7-82766845-2	E14
Merged-chr10-96309085-2	chr10	96307801	96310000	Merged-chr10-96309269-2	E14
Merged-chr2-107061871-2	chr2	107061801	107062000	Merged-chr2-107061842-2	E15
Merged-chr10-4301804-2	chr10	4301001	4302800	Merged-chr10-4301707-2	E11
Merged-chr2-60710211-2	chr2	60708801	60711000	Merged-chr2-60710522-2	E6
Merged-chr5-107065263-2	chr5	107065001	107065400	Merged-chr5-107065326-1	E5
Merged-chr17-4626415-2	chr17	4626001	4626800	Merged-chr17-4626429-2	E14
Merged-chr4-140273309-2	chr4	140272601	140274000	Merged-chr4-140273318-2	E17
Merged-chr5-105498811-2	chr5	105498401	105499600	Merged-chr5-105498622-1	E15
Merged-chr15-96297299-2	chr15	96297201	96297400	Merged-chr15-96297298-2	E7
Merged-chr2-152816553-2	chr2	152816401	152816800	Merged-chr2-152816506-2	E3
Merged-chr5-146907802-2	chr5	146907601	146908000	Merged-chr5-146907803-2	E3
Merged-chr5-134942641-2	chr5	134941201	134945400	Merged-chr5-134941981-1	E12
Merged-chr8-89003122-2	chr8	89000401	89005000	Merged-chr8-89003544-2	E13
Merged-chr16-32516467-2	chr16	32516001	32516800	Merged-chr16-32516533-2	E2
Merged-chr16-22120627-2	chr16	22120201	22121000	Merged-chr16-22120653-2	E10
Merged-chr19-21816461-2	chr19	21816401	21816600	Merged-chr19-21816421-2	E8
Merged-chr15-30796747-2	chr15	30790201	30799200	Merged-chr15-30798793-2	E17
Merged-chr6-83510935-2	chr6	83509801	83513400	Merged-chr6-83510269-2	E17
Merged-chr12-32499489-2	chr12	32493201	32504200	Merged-chr12-32500277-2	E17
Merged-chr1-54485146-2	chr1	54484801	54485600	Merged-chr1-54485091-2	E14
Merged-chr11-100729005-2	chr11	100728801	100729600	Merged-chr11-100728809-2	E9
Merged-chr11-119690360-2	chr11	119690001	119691200	Merged-chr11-119690120-2	E7
Merged-chr17-87282990-2	chr17	87282001	87284200	Merged-chr17-87282879-2	E2
Merged-chr5-105000664-2	chr5	104999201	105001200	Merged-chr5-105001128-2	E17
Merged-chr11-33110095-2	chr11	33108601	33111200	Merged-chr11-33110290-2	E6
Merged-chr16-90553392-2	chr16	90553201	90553600	Merged-chr16-90553383-2	E5
Merged-chr16-18724895-2	chr16	18724801	18725000	Merged-chr16-18724889-2	E3
Merged-chr4-148925986-2	chr4	148923601	148927200	Merged-chr4-148926571-2	E3
Merged-chr17-14790640-2	chr17	14784801	14798400	Merged-chr17-14789680-1	E17
Merged-chr10-75913168-2	chr10	75912801	75913800	Merged-chr10-75913035-1	E8
Merged-chr5-111670057-2	chr5	111669601	111670600	Merged-chr5-111670013-2	E6
Merged-chr14-25318173-2	chr14	25317601	25318600	Merged-chr14-25318245-2	E2
Merged-chr5-36281237-2	chr5	36280001	36282800	Merged-chr5-36281073-2	E6
Merged-chr3-57759302-2	chr3	57754601	57761400	Merged-chr3-57760603-2	E10
Merged-chr2-31869790-2	chr2	31869401	31870000	Merged-chr2-31869880-2	E4
Merged-chr16-9030394-2	chr16	9030001	9031200	Merged-chr16-9030187-2	E5
Merged-chr11-114795617-2	chr11	114795201	114796400	Merged-chr11-114795434-2	E3
Merged-chr3-88147686-2	chr3	88147601	88147800	Merged-chr3-88147672-2	E3
Merged-chr16-26649750-2	chr16	26649601	26650000	Merged-chr16-26649700-2	E5
Merged-chr8-77577882-2	chr8	77577801	77578000	Merged-chr8-77577864-2	E7
Merged-chr1-180412297-2	chr1	180411601	180413600	Merged-chr1-180411994-2	E6
Merged-chr11-104059341-2	chr11	104059201	104059400	Merged-chr11-104059381-1	E4
Merged-chr11-116972883-2	chr11	116972601	116973000	Merged-chr11-116972966-1	E3
Merged-chr3-28220069-2	chr3	28219601	28220400	Merged-chr3-28220137-2	E5
Merged-chr10-110856162-2	chr10	110855001	110857200	Merged-chr10-110856223-2	E13
Merged-chr17-16218797-2	chr17	16218601	16219000	Merged-chr17-16218794-2	E14
Merged-chr6-99671380-2	chr6	99671201	99671600	Merged-chr6-99671360-2	E6
Merged-chr10-88773538-2	chr10	88770001	88781200	Merged-chr10-88771475-1	E9
Merged-chr3-41594999-2	chr3	41594401	41595200	Merged-chr3-41595197-2	E9
Merged-chr15-63998139-2	chr15	63997401	63998600	Merged-chr15-63998277-2	E2
Merged-chr13-51688978-2	chr13	51688401	51689400	Merged-chr13-51689055-1	E7
Merged-chr6-4087103-2	chr6	4087001	4087200	Merged-chr6-4087106-1	E13
Merged-chr11-108118950-2	chr11	108115401	108120400	Merged-chr11-108119999-2	E17
Merged-chr8-112404331-2	chr8	112404201	112404400	Merged-chr8-112404361-1	E5
Merged-chr11-99774066-2	chr11	99772601	99778400	Merged-chr11-99772631-2	E17
Merged-chr15-58018065-2	chr15	58017801	58018400	Merged-chr15-58018029-2	E6
Merged-chr15-25763678-2	chr15	25759001	25770800	Merged-chr15-25762456-2	E12
Merged-chr14-118641073-2	chr14	118640801	118641600	Merged-chr14-118640945-2	E10
Merged-chr14-73325472-2	chr14	73324801	73326600	Merged-chr14-73325243-2	E2
Merged-chr8-122848279-2	chr8	122848001	122848400	Merged-chr8-122848357-2	E3
Merged-chr9-22499179-2	chr9	22496201	22500600	Merged-chr9-22499958-2	E17
Merged-chr15-99440619-2	chr15	99440201	99441000	Merged-chr15-99440638-1	E7
Merged-chr11-66932915-2	chr11	66931401	66934200	Merged-chr11-66933030-2	E14
Merged-chr11-118171008-2	chr11	118170601	118171600	Merged-chr11-118170916-2	E7
Merged-chr9-31084878-2	chr9	31084801	31085000	Merged-chr9-31084856-1	E4
Merged-chr3-158031595-2	chr3	158031401	158031800	Merged-chr3-158031589-2	E2
Merged-chr4-49838040-2	chr4	49837801	49838200	Merged-chr4-49838080-2	E15
Merged-chr13-12889808-2	chr13	12889601	12890000	Merged-chr13-12889816-1	E3
Merged-chr18-76379118-2	chr18	76379001	76379400	Merged-chr18-76379035-2	E2
Merged-chr7-49523242-2	chr7	49523001	49523400	Merged-chr7-49523284-2	E13
Merged-chr17-22546945-2	chr17	22546801	22547000	Merged-chr17-22546989-1	E5
Merged-chr2-105370319-2	chr2	105370201	105370400	Merged-chr2-105370338-2	E15
Merged-chr2-6872503-2	chr2	6871801	6873000	Merged-chr2-6872605-2	E2
Merged-chr7-4825854-2	chr7	4825601	4826600	Merged-chr7-4825607-2	E13
Merged-chr2-93433051-2	chr2	93432001	93434000	Merged-chr2-93433102-2	E4
Merged-chr10-91176755-2	chr10	91175001	91177400	Merged-chr10-91177310-2	E11
Merged-chr1-7313890-2	chr1	7313001	7315200	Merged-chr1-7313679-2	E18
Merged-chr1-177441784-2	chr1	177441401	177442000	Merged-chr1-177441868-2	E2
Merged-chr11-115294474-2	chr11	115294401	115294600	Merged-chr11-115294447-2	E3
Merged-chr8-124906033-2	chr8	124905201	124907600	Merged-chr8-124905665-2	E9
Merged-chr15-78928354-2	chr15	78928201	78928800	Merged-chr15-78928207-2	E13
Merged-chr1-85262482-2	chr1	85261801	85263400	Merged-chr1-85262363-1	E14
Merged-chr5-136717018-2	chr5	136716201	136717600	Merged-chr5-136717136-2	E14
Merged-chr1-176683201-2	chr1	176683001	176683400	Merged-chr1-176683202-2	E5
Merged-chr12-102950068-2	chr12	102949601	102951000	Merged-chr12-102949836-1	E1
Merged-chr4-130915504-2	chr4	130914201	130916200	Merged-chr4-130915807-2	E12
Merged-chr19-16598980-2	chr19	16598601	16599200	Merged-chr19-16599060-2	E3
Merged-chr11-94163271-2	chr11	94162801	94164000	Merged-chr11-94163142-2	E3
Merged-chr13-100616736-2	chr13	100616201	100617200	Merged-chr13-100616772-2	E2
Merged-chr11-97661847-2	chr11	97661601	97662200	Merged-chr11-97661794-2	E2
Merged-chr6-100319541-2	chr6	100315601	100321000	Merged-chr6-100320781-2	E6
Merged-chr12-105005588-2	chr12	105005201	105005800	Merged-chr12-105005676-2	E4
Merged-chr11-103656739-2	chr11	103656001	103657600	Merged-chr11-103656678-1	E6
Merged-chr16-95983884-2	chr16	95983601	95984400	Merged-chr16-95983768-2	E8
Merged-chr4-149937070-2	chr4	149936801	149937200	Merged-chr4-149937139-2	E3
Merged-chr11-4147296-2	chr11	4147201	4147400	Merged-chr11-4147292-2	E3
Merged-chr4-154210020-2	chr4	154209001	154211000	Merged-chr4-154210040-2	E4
Merged-chr5-92649971-2	chr5	92649801	92650200	Merged-chr5-92649942-1	E4
Merged-chr11-96929279-2	chr11	96928801	96929600	Merged-chr11-96929357-2	E2
Merged-chr1-58486521-2	chr1	58484801	58488600	Merged-chr1-58486341-2	E9
Merged-chr1-159392098-2	chr1	159391201	159392600	Merged-chr1-159392296-2	E17
Merged-chr13-38109335-2	chr13	38109201	38109600	Merged-chr13-38109269-1	E13
Merged-chr11-88974193-2	chr11	88973801	88974800	Merged-chr11-88974086-2	E2
Merged-chr5-143654523-2	chr5	143652201	143656000	Merged-chr5-143654946-1	E10
Merged-chr5-35186279-2	chr5	35186001	35186400	Merged-chr5-35186358-2	E4
Merged-chr6-30682702-2	chr6	30682601	30683000	Merged-chr6-30682603-1	E3
Merged-chr11-99591148-2	chr11	99590801	99591400	Merged-chr11-99591195-2	E5
Merged-chr2-29493569-2	chr2	29493201	29494000	Merged-chr2-29493538-2	E3
Merged-chr11-76329006-2	chr11	76328801	76329200	Merged-chr11-76329012-2	E4
Merged-chr9-121371652-2	chr9	121371601	121371800	Merged-chr9-121371603-2	E1
Merged-chr8-91872778-2	chr8	91872601	91873000	Merged-chr8-91872755-2	E2
Merged-chr3-15098558-2	chr3	15098201	15099400	Merged-chr3-15098316-1	E15
Merged-chr8-123997076-2	chr8	123997001	123997200	Merged-chr8-123997051-2	E8
Merged-chr11-52479919-2	chr11	52479601	52480600	Merged-chr11-52479737-2	E6
Merged-chr3-145691086-2	chr3	145689001	145693200	Merged-chr3-145691071-2	E6
Merged-chr11-120986080-2	chr11	120984001	120988800	Merged-chr11-120985760-2	E11
Merged-chr7-117278701-2	chr7	117278401	117279400	Merged-chr7-117278502-2	E5
Merged-chr5-37729096-2	chr5	37728801	37729200	Merged-chr5-37729192-2	E6
Merged-chr6-132990660-2	chr6	132971801	133019200	Merged-chr6-132985819-2	E16
Merged-chr5-140488163-2	chr5	140487201	140489200	Merged-chr5-140488126-1	E6
Merged-chr8-68186114-2	chr8	68177801	68193400	Merged-chr8-68186628-2	E17
Merged-chr16-91067297-2	chr16	91067201	91067400	Merged-chr16-91067293-1	E4
Merged-chr9-107693732-2	chr9	107693601	107693800	Merged-chr9-107693764-2	E4
Merged-chr9-123461999-2	chr9	123461801	123462200	Merged-chr9-123461997-1	E12
Merged-chr6-125161890-2	chr6	125161601	125162600	Merged-chr6-125161679-1	E11
Merged-chr5-124505223-2	chr5	124504801	124505600	Merged-chr5-124505245-2	E14
Merged-chr12-112206658-2	chr12	112205201	112207800	Merged-chr12-112206816-2	E4
Merged-chr11-28948604-2	chr11	28943801	28953600	Merged-chr11-28948507-1	E17
Merged-chr8-123413051-2	chr8	123413001	123413200	Merged-chr8-123413001-2	E2
Merged-chr10-118121791-2	chr10	118120801	118122200	Merged-chr10-118122082-2	E14
Merged-chr19-21784713-2	chr19	21784201	21785600	Merged-chr19-21784525-2	E13
Merged-chr17-31422305-2	chr17	31422201	31422600	Merged-chr17-31422209-2	E3
Merged-chr2-112455344-2	chr2	112454801	112455600	Merged-chr2-112455488-1	E2
Merged-chr11-31870941-2	chr11	31870201	31871600	Merged-chr11-31870982-2	E2
Merged-chr9-113406811-2	chr9	113398401	113415200	Merged-chr9-113406822-1	E17
Merged-chr11-99643799-2	chr11	99643601	99644000	Merged-chr11-99643797-2	E4
Merged-chr1-44155693-2	chr1	44149401	44159000	Merged-chr1-44157185-1	E10
Merged-chr5-36371304-2	chr5	36371001	36372000	Merged-chr5-36371107-1	E4
Merged-chr11-99627894-2	chr11	99627601	99628000	Merged-chr11-99627988-2	E5
Merged-chr11-115357663-2	chr11	115357601	115357800	Merged-chr11-115357625-2	E4
Merged-chr8-119360330-2	chr8	119360201	119360400	Merged-chr8-119360359-1	E4
Merged-chr13-104576566-2	chr13	104576401	104576800	Merged-chr13-104576531-2	E5
Merged-chr3-121530453-2	chr3	121529801	121530800	Merged-chr3-121530606-2	E14
Merged-chr13-34344512-2	chr13	34343801	34346000	Merged-chr13-34344123-1	E2
Merged-chr17-3410494-2	chr17	3410401	3410600	Merged-chr17-3410487-2	E5
Merged-chr6-108569821-2	chr6	108569401	108570200	Merged-chr6-108569842-1	E14
Merged-chr5-23675768-2	chr5	23674801	23676600	Merged-chr5-23675835-1	E2
Merged-chr1-36061562-2	chr1	36061201	36062400	Merged-chr1-36061324-2	E13
Merged-chr2-113829051-2	chr2	113828801	113829200	Merged-chr2-113829101-2	E3
Merged-chr15-101116728-2	chr15	101115601	101117200	Merged-chr15-101117056-2	E4
Merged-chr13-115089536-2	chr13	115089201	115090200	Merged-chr13-115089371-2	E2
Merged-chr18-57454294-2	chr18	57454001	57454800	Merged-chr18-57454188-2	E15
Merged-chr8-110217942-2	chr8	110217601	110218200	Merged-chr8-110217984-2	E2
Merged-chr15-77863291-2	chr15	77863201	77863400	Merged-chr15-77863282-2	E2
Merged-chr3-18695765-2	chr3	18695201	18696600	Merged-chr3-18695629-1	E14
Merged-chr9-113793291-2	chr9	113792801	113793800	Merged-chr9-113793281-2	E13
Merged-chr3-108036000-2	chr3	108035801	108036200	Merged-chr3-108035999-2	E5
Merged-chr15-88950460-2	chr15	88949201	88953200	Merged-chr15-88949720-1	E6
Merged-chr19-4586795-2	chr19	4586401	4587000	Merged-chr19-4586890-2	E7
Merged-chr19-47328149-2	chr19	47327801	47328600	Merged-chr19-47328097-2	E2
Merged-chr5-96039569-2	chr5	96039201	96040000	Merged-chr5-96039538-2	E15
Merged-chr12-84198093-2	chr12	84197801	84198200	Merged-chr12-84198186-2	E14
Merged-chr11-96957352-2	chr11	96956601	96957800	Merged-chr11-96957503-2	E8
Merged-chr17-49889994-2	chr17	49889601	49890200	Merged-chr17-49890087-1	E3
Merged-chr11-35610420-2	chr11	35610201	35610800	Merged-chr11-35610340-2	E4
Merged-chr2-130780862-2	chr2	130780601	130781200	Merged-chr2-130780824-2	E7
Merged-chr1-64196186-2	chr1	64196001	64196400	Merged-chr1-64196172-2	E3
Merged-chr11-9263214-2	chr11	9262801	9263600	Merged-chr11-9263227-2	E15
Merged-chr10-95898997-2	chr10	95898801	95899200	Merged-chr10-95898993-2	E5
Merged-chr7-64364208-2	chr7	64364001	64364800	Merged-chr7-64364015-2	E7
Merged-chr11-70764408-2	chr11	70763801	70765000	Merged-chr11-70764415-2	E2
Merged-chr7-3423515-2	chr7	3423001	3424000	Merged-chr7-3423529-2	E2
Merged-chr9-62177271-2	chr9	62171401	62180000	Merged-chr9-62178842-2	E17
Merged-chr4-59878684-2	chr4	59878401	59878800	Merged-chr4-59878768-2	E7
Merged-chr3-101796365-2	chr3	101796001	101796600	Merged-chr3-101796430-1	E3
Merged-chr18-76657899-2	chr18	76657801	76658000	Merged-chr18-76657897-2	E4
Merged-chr3-27441510-2	chr3	27440401	27443600	Merged-chr3-27441020-2	E10
Merged-chr11-60722875-2	chr11	60722601	60723200	Merged-chr11-60722850-2	E7
Merged-chr10-118034510-2	chr10	118033401	118035400	Merged-chr10-118034620-2	E18
Merged-chr6-145354839-2	chr6	145353401	145358600	Merged-chr6-145353678-1	E6
Merged-chr5-135249170-2	chr5	135248801	135249600	Merged-chr5-135249139-2	E3
Merged-chr17-87272480-2	chr17	87268001	87276600	Merged-chr17-87272660-2	E17
Merged-chr19-48807463-2	chr19	48807201	48807600	Merged-chr19-48807525-1	E15
Merged-chr1-86434542-2	chr1	86434001	86435000	Merged-chr1-86434583-2	E2
Merged-chr8-123112012-2	chr8	123111401	123113000	Merged-chr8-123111824-2	E6
Merged-chr1-24613058-2	chr1	24612601	24613400	Merged-chr1-24613116-1	E15
Merged-chr14-24253976-2	chr14	24253201	24254600	Merged-chr14-24254051-2	E13
Merged-chr17-36111715-2	chr17	36111601	36112000	Merged-chr17-36111630-1	E1
Merged-chr9-110685537-2	chr9	110685201	110686000	Merged-chr9-110685474-2	E3
Merged-chr18-65925255-2	chr18	65924601	65925800	Merged-chr18-65925309-2	E13
Merged-chr3-90224637-2	chr3	90224401	90225000	Merged-chr3-90224573-2	E3
Merged-chr9-65544500-2	chr9	65542201	65545800	Merged-chr9-65545000-2	E6
Merged-chr4-62516326-2	chr4	62516201	62516400	Merged-chr4-62516352-1	E3
Merged-chr2-32174379-2	chr2	32174001	32174800	Merged-chr2-32174357-2	E2
Merged-chr15-52967942-2	chr15	52967601	52968200	Merged-chr15-52967984-2	E14
Merged-chr12-110566846-2	chr12	110566201	110567400	Merged-chr12-110566891-2	E8
Merged-chr19-36057195-2	chr19	36056601	36057800	Merged-chr19-36057189-2	E2
Merged-chr17-24550263-2	chr17	24550001	24550800	Merged-chr17-24550126-2	E2
Merged-chr10-83168668-2	chr10	83167801	83169000	Merged-chr10-83168935-1	E6
Merged-chr8-12127953-2	chr8	12127801	12128200	Merged-chr8-12127906-1	E4
Merged-chr2-151991386-2	chr2	151991001	151992400	Merged-chr2-151991072-2	E3
Merged-chr9-57402433-2	chr9	57402201	57402600	Merged-chr9-57402466-2	E4
Merged-chr19-29999998-2	chr19	29997601	30003600	Merged-chr19-29999396-1	E6
Merged-chr12-51166435-2	chr12	51165401	51168000	Merged-chr12-51166169-2	E17
Merged-chr15-95797443-2	chr15	95797201	95797600	Merged-chr15-95797485-2	E7
Merged-chr17-28388627-2	chr17	28387801	28389200	Merged-chr17-28388753-2	E6
Merged-chr9-66281771-2	chr9	66281601	66282000	Merged-chr9-66281742-2	E3
Merged-chr4-117737668-2	chr4	117737401	117737800	Merged-chr4-117737736-2	E14
Merged-chr6-31307215-2	chr6	31307001	31307400	Merged-chr6-31307229-2	E15
Merged-chr11-99665672-2	chr11	99665601	99665800	Merged-chr11-99665644-2	E6
Merged-chr19-4057991-2	chr19	4057401	4059000	Merged-chr19-4057781-1	E3
Merged-chr5-123766701-2	chr5	123766401	123767200	Merged-chr5-123766602-2	E10
Merged-chr4-145447682-2	chr4	145447201	145448600	Merged-chr4-145447464-1	E11
Merged-chr7-127678220-2	chr7	127677401	127679000	Merged-chr7-127678239-2	E6
Merged-chr4-138418501-2	chr4	138418401	138418600	Merged-chr4-138418502-2	E3
Merged-chr5-35813464-2	chr5	35813401	35813600	Merged-chr5-35813428-2	E4
Merged-chr9-106646768-2	chr9	106646201	106647200	Merged-chr9-106646835-2	E1
Merged-chr2-172977500-2	chr2	172977401	172977600	Merged-chr2-172977500-1	E2
Merged-chr5-108629699-2	chr5	108629201	108630400	Merged-chr5-108629598-2	E2
Merged-chr13-38205134-2	chr13	38205001	38205400	Merged-chr13-38205068-1	E2
Merged-chr7-63209334-2	chr7	63209201	63209400	Merged-chr7-63209367-2	E16
Merged-chr6-136387554-2	chr6	136385801	136388200	Merged-chr6-136388108-2	E17
Merged-chr19-44931038-2	chr19	44930801	44931600	Merged-chr19-44930875-2	E2
Merged-chr17-45602044-2	chr17	45601201	45602600	Merged-chr17-45602187-2	E2
Merged-chr2-158799222-2	chr2	158798001	158800000	Merged-chr2-158799444-1	E11
Merged-chr6-100076737-2	chr6	100075801	100079200	Merged-chr6-100075974-1	E6
Merged-chr14-118871658-2	chr14	118869601	118872400	Merged-chr14-118872316-2	E17
Merged-chr19-47019511-2	chr19	47019201	47019800	Merged-chr19-47019522-2	E2
Merged-chr3-89090870-2	chr3	89089401	89092200	Merged-chr3-89090939-1	E2
Merged-chr16-29762092-2	chr16	29761801	29762200	Merged-chr16-29762184-2	E3
Merged-chr4-139968185-2	chr4	139967801	139968600	Merged-chr4-139968169-2	E3
Merged-chr12-84114609-2	chr12	84114401	84114800	Merged-chr12-84114617-2	E2
Merged-chr15-78486834-2	chr15	78486601	78487200	Merged-chr15-78486768-2	E4
Merged-chr14-48475779-2	chr14	48475401	48476200	Merged-chr14-48475757-2	E15
Merged-chr8-70928248-2	chr8	70928001	70928400	Merged-chr8-70928296-1	E4
Merged-chr7-37777438-2	chr7	37775801	37778000	Merged-chr7-37777975-2	E6
Merged-chr5-120674477-2	chr5	120674401	120674600	Merged-chr5-120674453-1	E2
Merged-chr3-33631499-2	chr3	33629001	33634000	Merged-chr3-33631498-2	E17
Merged-chr17-45616287-2	chr17	45616201	45616400	Merged-chr17-45616273-2	E3
Merged-chr7-142273105-2	chr7	142268201	142276600	Merged-chr7-142273810-2	E17
Merged-chr15-100413779-2	chr15	100412601	100414200	Merged-chr15-100414158-2	E10
Merged-chr3-34649555-2	chr3	34648801	34651400	Merged-chr3-34649009-1	E2
Merged-chr19-38178498-2	chr19	38178401	38178600	Merged-chr19-38178496-2	E7
Merged-chr12-54403778-2	chr12	54401801	54404600	Merged-chr12-54404355-2	E6
Merged-chr6-88198587-2	chr6	88198001	88199200	Merged-chr6-88198574-2	E2
Merged-chr2-65923969-2	chr2	65923001	65926400	Merged-chr2-65923238-2	E17
Merged-chr19-32242367-2	chr19	32241801	32242800	Merged-chr19-32242434-1	E13
Merged-chr5-110101151-2	chr5	110100001	110102400	Merged-chr5-110101102-2	E2
Merged-chr7-143252853-2	chr7	143251401	143253400	Merged-chr7-143253305-2	E10
Merged-chr7-30289782-2	chr7	30289401	30290000	Merged-chr7-30289864-2	E3
Merged-chr7-19747751-2	chr7	19746401	19748600	Merged-chr7-19748002-2	E12
Merged-chr4-139697949-2	chr4	139697801	139698200	Merged-chr4-139697897-2	E3
Merged-chr17-79365077-2	chr17	79364801	79365800	Merged-chr17-79364854-2	E14
Merged-chr1-153184266-2	chr1	153184001	153184800	Merged-chr1-153184132-2	E6
Merged-chr4-56942878-2	chr4	56942601	56943000	Merged-chr4-56942955-2	E11
Merged-chr14-63500149-2	chr14	63497201	63502800	Merged-chr14-63500297-2	E12
Merged-chr2-169618005-2	chr2	169617001	169619600	Merged-chr2-169617710-2	E17
Merged-chr6-32181735-2	chr6	32181401	32182400	Merged-chr6-32181570-1	E4
Merged-chr11-51844978-2	chr11	51844801	51845200	Merged-chr11-51844955-2	E7
Merged-chr11-81616667-2	chr11	81616601	81616800	Merged-chr11-81616634-2	E3
Merged-chr8-20330020-2	chr8	20329601	20330200	Merged-chr8-20330139-2	E5
Merged-chr1-171542594-2	chr1	171541001	171544400	Merged-chr1-171542488-1	E14
Merged-chr17-89934179-2	chr17	89933001	89935400	Merged-chr17-89934157-2	E14
Merged-chr9-94669945-2	chr9	94667001	94671800	Merged-chr9-94670489-2	E1
Merged-chr2-144369066-2	chr2	144368401	144369400	Merged-chr2-144369231-2	E2
Merged-chr15-44716233-2	chr15	44716001	44716600	Merged-chr15-44716165-2	E15
Merged-chr4-128737477-2	chr4	128737001	128738000	Merged-chr4-128737454-1	E13
Merged-chr6-113852526-2	chr6	113852201	113852800	Merged-chr6-113852552-1	E15
Merged-chr2-135887660-2	chr2	135886001	135888600	Merged-chr2-135888019-2	E17
Merged-chr14-55575775-2	chr14	55575401	55576400	Merged-chr14-55575649-1	E3
Merged-chr10-81242258-2	chr10	81242201	81242400	Merged-chr10-81242216-1	E3
Merged-chr8-127006779-2	chr8	127006201	127007200	Merged-chr8-127006857-2	E5
Merged-chr7-84098251-2	chr7	84098001	84098400	Merged-chr7-84098301-2	E15
Merged-chr10-13999328-2	chr10	13993601	14011800	Merged-chr10-13995956-2	E17
Merged-chr7-116530891-2	chr7	116530601	116531000	Merged-chr7-116530982-1	E3
Merged-chr4-99206011-2	chr4	99205801	99206200	Merged-chr4-99206022-2	E5
Merged-chr19-31252021-2	chr19	31238801	31257200	Merged-chr19-31256041-2	E17
Merged-chr4-31723897-2	chr4	31723601	31724600	Merged-chr4-31723694-2	E5
Merged-chr2-167582724-2	chr2	167582001	167584000	Merged-chr2-167582447-2	E3
Merged-chr14-70659199-2	chr14	70659001	70659600	Merged-chr14-70659098-1	E2
Merged-chr13-29034665-2	chr13	29034601	29034800	Merged-chr13-29034630-2	E3
Merged-chr7-141901761-2	chr7	141901201	141902000	Merged-chr7-141901922-1	E12
Merged-chr14-44602731-2	chr14	44602401	44603000	Merged-chr14-44602762-2	E15
Merged-chr13-57949702-2	chr13	57949601	57949800	Merged-chr13-57949704-2	E4
Merged-chr1-182019922-2	chr1	182019201	182020800	Merged-chr1-182019844-2	E2
Merged-chr5-38765458-2	chr5	38765201	38765600	Merged-chr5-38765515-1	E5
Merged-chr2-168423285-2	chr2	168423201	168423400	Merged-chr2-168423270-2	E4
Merged-chr5-137268380-2	chr5	137268201	137268800	Merged-chr5-137268260-2	E2
Merged-chr14-17586813-2	chr14	17585401	17589600	Merged-chr14-17586126-2	E16
Merged-chr14-62852735-2	chr14	62852001	62853000	Merged-chr14-62852969-2	E10
Merged-chr18-21027546-2	chr18	21022401	21030200	Merged-chr18-21028791-2	E9
Merged-chr10-127091171-2	chr10	127090801	127092000	Merged-chr10-127090942-1	E2
Merged-chr11-102375266-2	chr11	102375001	102375400	Merged-chr11-102375332-2	E3
Merged-chr9-107521389-2	chr9	107521201	107521600	Merged-chr9-107521377-2	E2
Merged-chr4-118019489-2	chr4	118019401	118019600	Merged-chr4-118019478-1	E14
Merged-chr16-35551508-2	chr16	35551201	35552000	Merged-chr16-35551416-1	E10
Merged-chr4-80911858-2	chr4	80911001	80912200	Merged-chr4-80912116-2	E2
Merged-chr14-89565361-2	chr14	89556601	89589800	Merged-chr14-89557522-2	E16
Merged-chr2-52928061-2	chr2	52927801	52928600	Merged-chr2-52927922-1	E7
Merged-chr17-15990858-2	chr17	15990201	15992400	Merged-chr17-15990416-2	E15
Merged-chr2-31957462-2	chr2	31957401	31957600	Merged-chr2-31957424-2	E3
Merged-chr10-77130140-2	chr10	77130001	77130200	Merged-chr10-77130180-2	E3
Merged-chr5-121415180-2	chr5	121412801	121420000	Merged-chr5-121413960-2	E9
Merged-chr17-73053292-2	chr17	73046001	73058400	Merged-chr17-73054383-1	E17
Merged-chr16-31489216-2	chr16	31488401	31489800	Merged-chr16-31489331-2	E14
Merged-chr16-20522670-2	chr16	20522401	20523000	Merged-chr16-20522639-2	E10
Merged-chr11-65713199-2	chr11	65712801	65713800	Merged-chr11-65713098-1	E7
Merged-chr11-88252815-2	chr11	88252001	88253200	Merged-chr11-88253029-2	E3
Merged-chr13-9329535-2	chr13	9329401	9329600	Merged-chr13-9329570-2	E3
Merged-chr9-20839168-2	chr9	20838801	20839600	Merged-chr9-20839135-2	E4
Merged-chr1-132736494-2	chr1	132736401	132736600	Merged-chr1-132736487-2	E3
Merged-chr5-144253095-2	chr5	144252601	144253600	Merged-chr5-144253089-2	E6
Merged-chr8-104509722-2	chr8	104509001	104510000	Merged-chr8-104509944-1	E2
Merged-chr15-96333556-2	chr15	96333001	96334000	Merged-chr15-96333612-2	E13
Merged-chr10-47631660-2	chr10	47631201	47632000	Merged-chr10-47631720-2	E15
Merged-chr5-117068912-2	chr5	117068801	117069000	Merged-chr5-117068924-2	E4
Merged-chr12-25144814-2	chr12	25144201	25145400	Merged-chr12-25144828-2	E14
Merged-chr1-133798664-2	chr1	133798401	133798800	Merged-chr1-133798728-2	E3
Merged-chr4-153567943-2	chr4	153567801	153568200	Merged-chr4-153567886-2	E4
Merged-chr10-110854691-2	chr10	110853801	110855000	Merged-chr10-110854981-2	E14
Merged-chr5-121398502-2	chr5	121398001	121398800	Merged-chr5-121398604-2	E2
Merged-chr10-41552889-2	chr10	41552801	41553000	Merged-chr10-41552878-2	E13
Merged-chr11-98457736-2	chr11	98457001	98458600	Merged-chr11-98457672-1	E2
Merged-chr18-35815485-2	chr18	35814801	35815800	Merged-chr18-35815669-2	E2
Merged-chr7-65454567-2	chr7	65453601	65455800	Merged-chr7-65454434-2	E14
Merged-chr7-25530969-2	chr7	25530801	25531200	Merged-chr7-25530938-2	E15
Merged-chr7-45437863-2	chr7	45437601	45438400	Merged-chr7-45437725-1	E2
Merged-chr2-38418171-2	chr2	38418001	38418400	Merged-chr2-38418142-1	E15
Merged-chr17-6107236-2	chr17	6106401	6107600	Merged-chr17-6107472-2	E2
Merged-chr11-99580843-2	chr11	99580601	99581000	Merged-chr11-99580885-2	E5
Merged-chr10-90827332-2	chr10	90826601	90828800	Merged-chr10-90826964-2	E1
Merged-chr12-85192912-2	chr12	85192401	85193200	Merged-chr12-85193024-2	E2
Merged-chr8-69887696-2	chr8	69885801	69889800	Merged-chr8-69887592-1	E2
Merged-chr12-102344480-2	chr12	102343801	102344800	Merged-chr12-102344660-2	E6
Merged-chr4-153153317-2	chr4	153152601	153154400	Merged-chr4-153153134-1	E18
Merged-chr11-101351837-2	chr11	101351601	101352000	Merged-chr11-101351873-2	E4
Merged-chr14-47629508-2	chr14	47629401	47629600	Merged-chr14-47629516-1	E12
Merged-chr12-111021208-2	chr12	111020601	111021600	Merged-chr12-111021316-2	E4
Merged-chr7-34460154-2	chr7	34460001	34460600	Merged-chr7-34460008-1	E15
Merged-chr8-78831842-2	chr8	78830801	78834200	Merged-chr8-78831183-2	E17
Merged-chr11-119991523-2	chr11	119991401	119991600	Merged-chr11-119991545-2	E3
Merged-chr19-3451800-2	chr19	3451401	3452000	Merged-chr19-3451899-2	E7
Merged-chr15-84411135-2	chr15	84410601	84411600	Merged-chr15-84411169-2	E6
Merged-chr7-4445651-2	chr7	4445601	4445800	Merged-chr7-4445601-2	E13
Merged-chr19-28946929-2	chr19	28946801	28947000	Merged-chr19-28946957-2	E5
Merged-chr14-122962170-2	chr14	122960201	122963400	Merged-chr14-122962540-2	E17
Merged-chr1-39478221-2	chr1	39477601	39479000	Merged-chr1-39478142-2	E2
Merged-chr7-25171024-2	chr7	25170601	25171400	Merged-chr7-25171047-2	E4
Merged-chr9-106126953-2	chr9	106126801	106127200	Merged-chr9-106126905-1	E3
Merged-chr13-116285735-2	chr13	116280801	116291400	Merged-chr13-116285369-2	E16
Merged-chr14-62423334-2	chr14	62417201	62425400	Merged-chr14-62425368-2	E17
Merged-chr16-50554837-2	chr16	50554601	50555000	Merged-chr16-50554873-2	E15
Merged-chrX-93089188-2	chrX	93089001	93089400	Merged-chrX-93089176-2	E15
Merged-chr1-160081902-2	chr1	160081401	160082600	Merged-chr1-160081803-2	E17
Merged-chr10-81335272-2	chr10	81334401	81337600	Merged-chr10-81334543-1	E3
Merged-chr4-43969577-2	chr4	43969401	43969800	Merged-chr4-43969554-2	E13
Merged-chr6-52168715-2	chr6	52168601	52168800	Merged-chr6-52168730-2	E3
Merged-chr5-116213266-2	chr5	116212801	116213800	Merged-chr5-116213231-2	E14
Merged-chr2-130875156-2	chr2	130874601	130875400	Merged-chr2-130875312-2	E17
Merged-chr12-113140594-2	chr12	113139801	113141800	Merged-chr12-113140387-2	E2
Merged-chr8-79079470-2	chr8	79079401	79079600	Merged-chr8-79079439-1	E14
Merged-chr9-65109602-2	chr9	65109201	65110000	Merged-chr9-65109604-2	E2
Merged-chr12-104645048-2	chr12	104644801	104645600	Merged-chr12-104644896-2	E5
Merged-chr6-142839708-2	chr6	142837001	142845200	Merged-chr6-142838315-2	E17
Merged-chr10-128035609-2	chr10	128035201	128036200	Merged-chr10-128035517-2	E2
Merged-chr8-10255975-2	chr8	10255801	10256200	Merged-chr8-10255949-1	E15
Merged-chr13-113653179-2	chr13	113653001	113653600	Merged-chr13-113653057-2	E18
Merged-chr8-114116283-2	chr8	114115801	114116800	Merged-chr8-114116266-2	E14
Merged-chr7-4516724-2	chr7	4516401	4517400	Merged-chr7-4516548-2	E14
Merged-chr1-172133716-2	chr1	172133601	172133800	Merged-chr1-172133731-2	E8
Merged-chr9-37054321-2	chr9	37054001	37054600	Merged-chr9-37054341-2	E2
Merged-chrX-83487183-2	chrX	83486801	83488000	Merged-chrX-83486966-2	E15
Merged-chr10-121844110-2	chr10	121843401	121846200	Merged-chr10-121843419-2	E17
Merged-chr15-100630233-2	chr15	100629801	100630400	Merged-chr15-100630365-2	E8
Merged-chr1-118458237-2	chr1	118458001	118458800	Merged-chr1-118458073-1	E11
Merged-chr10-127084410-2	chr10	127084201	127085000	Merged-chr10-127084220-2	E6
Merged-chr7-51270839-2	chr7	51270401	51271000	Merged-chr7-51270977-2	E15
Merged-chr5-35211659-2	chr5	35211601	35211800	Merged-chr5-35211617-2	E4
Merged-chr8-124262243-2	chr8	124262001	124262400	Merged-chr8-124262285-2	E10
Merged-chr14-114959969-2	chr14	114959801	114960200	Merged-chr14-114959938-2	E5
Merged-chr2-154343689-2	chr2	154343601	154343800	Merged-chr2-154343677-1	E8
Merged-chr11-100256432-2	chr11	100256201	100256600	Merged-chr11-100256463-2	E3
Merged-chr7-139764217-2	chr7	139763801	139764400	Merged-chr7-139764334-2	E4
Merged-chr9-20831043-2	chr9	20830801	20831200	Merged-chr9-20831086-2	E2
Merged-chr7-45694134-2	chr7	45693801	45694600	Merged-chr7-45694067-1	E2
Merged-chr11-95991191-2	chr11	95990801	95991800	Merged-chr11-95991081-1	E2
Merged-chr2-62664409-2	chr2	62664201	62664600	Merged-chr2-62664417-1	E2
Merged-chr2-167268281-2	chr2	167268001	167268800	Merged-chr2-167268161-2	E4
Merged-chr5-61160380-2	chr5	61160201	61160600	Merged-chr5-61160360-2	E15
Merged-chr5-147293249-2	chr5	147292401	147293800	Merged-chr5-147293397-2	E3
Merged-chr12-112141675-2	chr12	112140201	112143400	Merged-chr12-112141549-2	E1
Merged-chr11-99837453-2	chr11	99837201	99837600	Merged-chr11-99837505-2	E5
Merged-chr5-14039210-2	chr5	14038801	14039400	Merged-chr5-14039319-2	E13
Merged-chr6-89345812-2	chr6	89345001	89346200	Merged-chr6-89346024-2	E3
Merged-chr2-32168830-2	chr2	32168001	32171200	Merged-chr2-32168060-2	E12
Merged-chr1-59400046-2	chr1	59399601	59400400	Merged-chr1-59400092-2	E4
Merged-chr10-8297422-2	chr10	8297201	8297600	Merged-chr10-8297443-2	E15
Merged-chr2-73049004-2	chr2	73048801	73049200	Merged-chr2-73049008-1	E13
Merged-chr8-93929283-2	chr8	93928801	93929600	Merged-chr8-93929365-1	E3
Merged-chr1-91414343-2	chr1	91414001	91414800	Merged-chr1-91414285-2	E2
Merged-chr12-100268245-2	chr12	100268001	100268400	Merged-chr12-100268290-1	E1
Merged-chr3-131592045-2	chr3	131590201	131594400	Merged-chr3-131591790-2	E17
Merged-chr7-140841303-2	chr7	140841201	140841400	Merged-chr7-140841305-2	E14
Merged-chr9-120759961-2	chr9	120759801	120760200	Merged-chr9-120759921-2	E3
Merged-chr6-57724107-2	chr6	57721201	57731600	Merged-chr6-57721814-2	E17
Merged-chr1-127774427-2	chr1	127774201	127774800	Merged-chr1-127774354-1	E2
Merged-chr3-58872012-2	chr3	58871801	58872200	Merged-chr3-58872024-2	E5
Merged-chr6-127969579-2	chr6	127968401	127970200	Merged-chr6-127969857-2	E6
Merged-chr17-7271758-2	chr17	7271601	7272000	Merged-chr17-7271715-2	E7
Merged-chr11-117934596-2	chr11	117934001	117935400	Merged-chr11-117934492-1	E2
Merged-chr18-77272840-2	chr18	77272601	77273000	Merged-chr18-77272879-2	E5
Merged-chr1-126150190-2	chr1	126150001	126150600	Merged-chr1-126150080-2	E15
Merged-chr2-165470395-2	chr2	165470201	165470800	Merged-chr2-165470289-2	E4
Merged-chr6-118066433-2	chr6	118065201	118067200	Merged-chr6-118066666-2	E2
Merged-chr4-141106784-2	chr4	141106401	141107200	Merged-chr4-141106768-2	E4
Merged-chr3-133462642-2	chr3	133462201	133463000	Merged-chr3-133462683-2	E7
Merged-chr11-99792852-2	chr11	99792601	99793200	Merged-chr11-99792804-2	E5
Merged-chr12-70347159-2	chr12	70346201	70348000	Merged-chr12-70347218-1	E2
Merged-chr17-12154577-2	chr17	12154401	12154800	Merged-chr17-12154554-1	E8
Merged-chr9-58443559-2	chr9	58443001	58444800	Merged-chr9-58443218-2	E4
Merged-chr6-39436780-2	chr6	39434401	39442000	Merged-chr6-39435360-2	E14
Merged-chr11-68556032-2	chr11	68555801	68556200	Merged-chr11-68556064-2	E3
Merged-chr8-83692831-2	chr8	83692601	83693000	Merged-chr8-83692862-1	E3
Merged-chr11-76287375-2	chr11	76287001	76287600	Merged-chr11-76287449-2	E2
Merged-chr4-148293634-2	chr4	148293401	148294200	Merged-chr4-148293468-1	E4
Merged-chr2-18892696-2	chr2	18887601	18896200	Merged-chr2-18893492-2	E17
Merged-chr11-68985957-2	chr11	68985401	68987600	Merged-chr11-68985414-2	E9
Merged-chr15-98744016-2	chr15	98743801	98744200	Merged-chr15-98744032-2	E7
Merged-chr17-44912525-2	chr17	44906201	44915000	Merged-chr17-44914450-2	E16
Merged-chr9-117397083-2	chr9	117396401	117397400	Merged-chr9-117397266-2	E18
Merged-chr10-18494347-2	chr10	18491401	18495800	Merged-chr10-18495094-2	E17
Merged-chr3-97027257-2	chr3	97025201	97031000	Merged-chr3-97026414-2	E6
Merged-chr14-64591624-2	chr14	64591401	64591800	Merged-chr14-64591648-1	E2
Merged-chr2-26446154-2	chr2	26445601	26446400	Merged-chr2-26446308-1	E2
Merged-chr17-35697894-2	chr17	35697401	35698400	Merged-chr17-35697887-2	E2
Merged-chr12-59040712-2	chr12	59040401	59041400	Merged-chr12-59040524-1	E14
Merged-chr4-136907140-2	chr4	136907001	136907200	Merged-chr4-136907180-1	E3
Merged-chr9-114428337-2	chr9	114428201	114428600	Merged-chr9-114428273-2	E3
Merged-chr16-8481910-2	chr16	8481601	8482400	Merged-chr16-8481819-2	E7
Merged-chr11-96509460-2	chr11	96509401	96509600	Merged-chr11-96509420-2	E4
Merged-chr12-26315196-2	chr12	26315001	26315400	Merged-chr12-26315192-2	E15
Merged-chr9-102668321-2	chr9	102668001	102668600	Merged-chr9-102668341-2	E3
Merged-chr11-75400396-2	chr11	75400201	75400600	Merged-chr11-75400392-2	E2
Merged-chr8-122523666-2	chr8	122522801	122525400	Merged-chr8-122523232-2	E2
Merged-chr7-81475235-2	chr7	81473401	81476400	Merged-chr7-81475569-2	E6
Merged-chr12-81787141-2	chr12	81786801	81787400	Merged-chr12-81787182-1	E14
Merged-chr6-39494412-2	chr6	39494201	39494800	Merged-chr6-39494323-2	E10
Merged-chr4-109017537-2	chr4	109017401	109017600	Merged-chr4-109017574-2	E7
Merged-chr7-64839834-2	chr7	64839401	64840000	Merged-chr7-64839967-2	E13
Merged-chr18-24132967-2	chr18	24132601	24133200	Merged-chr18-24133033-2	E6
Merged-chr9-61386470-2	chr9	61386201	61386600	Merged-chr9-61386539-1	E13
Merged-chr13-107668712-2	chr13	107668601	107668800	Merged-chr13-107668724-2	E3
Merged-chr8-21849141-2	chr8	21846001	21853000	Merged-chr8-21848781-2	E17
Merged-chr9-69471083-2	chr9	69470801	69471400	Merged-chr9-69471066-2	E14
Merged-chr6-36378104-2	chr6	36378001	36378200	Merged-chr6-36378108-1	E15
Merged-chr4-137158502-2	chr4	137157801	137158800	Merged-chr4-137158704-1	E4
Merged-chr2-6969584-2	chr2	6964801	6973800	Merged-chr2-6969867-1	E16
Merged-chr11-99857359-2	chr11	99854401	99858400	Merged-chr11-99858318-2	E17
Merged-chr3-9540656-2	chr3	9540601	9540800	Merged-chr3-9540612-2	E8
Merged-chr17-66720901-2	chr17	66720801	66721200	Merged-chr17-66720801-2	E3
Merged-chr14-78289208-2	chr14	78288801	78290000	Merged-chr14-78289015-2	E14
Merged-chr1-90405182-2	chr1	90404801	90405600	Merged-chr1-90405163-2	E14
Merged-chr13-73322392-2	chr13	73322001	73322600	Merged-chr13-73322483-2	E11
Merged-chr11-113203699-2	chr11	113203401	113204200	Merged-chr11-113203597-2	E14
Merged-chr2-114227944-2	chr2	114202601	114237600	Merged-chr2-114235788-2	E17
Merged-chr16-10884587-2	chr16	10883601	10885000	Merged-chr16-10884874-2	E4
Merged-chr8-111452191-2	chr8	111452001	111452600	Merged-chr8-111452082-2	E7
Merged-chr10-126979820-2	chr10	126979201	126981200	Merged-chr10-126979439-1	E2
Merged-chr5-125389608-2	chr5	125389201	125390200	Merged-chr5-125389515-2	E2
Merged-chr8-123357703-2	chr8	123357401	123358400	Merged-chr8-123357506-2	E3
Merged-chr11-118202571-2	chr11	118202201	118202800	Merged-chr11-118202642-1	E2
Merged-chr14-37820157-2	chr14	37820001	37820400	Merged-chr14-37820114-1	E15
Merged-chr4-148913260-2	chr4	148913201	148913400	Merged-chr4-148913220-2	E14
Merged-chr9-72217185-2	chr9	72216601	72217400	Merged-chr9-72217370-2	E6
Merged-chr16-44676162-2	chr16	44675601	44677800	Merged-chr16-44675624-1	E17
Merged-chr7-143785250-2	chr7	143785201	143785400	Merged-chr7-143785200-1	E4
Merged-chr2-104572898-2	chr2	104572801	104573000	Merged-chr2-104572896-2	E13
Merged-chr8-117112347-2	chr8	117112201	117112400	Merged-chr8-117112394-1	E4
Merged-chr11-97280544-2	chr11	97279601	97281000	Merged-chr11-97280787-1	E2
Merged-chr3-8702973-2	chr3	8702601	8703200	Merged-chr3-8703046-2	E4
Merged-chr4-155449256-2	chr4	155448601	155450000	Merged-chr4-155449212-2	E6
Merged-chr1-12035207-2	chr1	12034401	12037200	Merged-chr1-12034614-1	E16
Merged-chr4-59199837-2	chr4	59199601	59200000	Merged-chr4-59199873-1	E3
Merged-chr6-97517901-2	chr6	97517601	97518200	Merged-chr6-97517901-2	E3
Merged-chr12-26068366-2	chr12	26068001	26068800	Merged-chr12-26068331-2	E3
Merged-chr8-84194157-2	chr8	84193001	84194600	Merged-chr8-84194514-2	E13
Merged-chr11-54696155-2	chr11	54696001	54696400	Merged-chr11-54696110-1	E7
Merged-chr7-100663347-2	chr7	100663201	100663400	Merged-chr7-100663393-2	E13
Merged-chr13-20600421-2	chr13	20600201	20600600	Merged-chr13-20600441-2	E14
Merged-chr11-115797441-2	chr11	115793601	115799000	Merged-chr11-115798582-2	E8
Merged-chr9-62675988-2	chr9	62675601	62676400	Merged-chr9-62675976-2	E6
Merged-chrX-43430815-2	chrX	43430401	43431200	Merged-chrX-43430830-2	E13
Merged-chr12-40917649-2	chr12	40917201	40918200	Merged-chr12-40917598-2	E13
Merged-chr10-120957667-2	chr10	120957601	120957800	Merged-chr10-120957633-2	E3
Merged-chr1-75344968-2	chr1	75344201	75346000	Merged-chr1-75344835-2	E2
Merged-chr2-29261279-2	chr2	29261001	29261400	Merged-chr2-29261358-2	E4
Merged-chr15-73446996-2	chr15	73446601	73447200	Merged-chr15-73447091-1	E3
Merged-chr15-73687855-2	chr15	73687801	73688000	Merged-chr15-73687810-2	E15
Merged-chr11-119586204-2	chr11	119586001	119586800	Merged-chr11-119586007-2	E14
Merged-chr11-19631267-2	chr11	19631201	19631400	Merged-chr11-19631234-2	E5
Merged-chr11-73083398-2	chr11	73081201	73084200	Merged-chr11-73084095-2	E10
Merged-chr16-30051017-2	chr16	30050801	30051200	Merged-chr16-30051034-2	E4
Merged-chr8-23984426-2	chr8	23984201	23984800	Merged-chr8-23984351-2	E5
Merged-chr12-40222691-2	chr12	40222201	40223200	Merged-chr12-40222681-1	E2
Merged-chr2-29755638-2	chr2	29753401	29757400	Merged-chr2-29755875-2	E6
Merged-chr17-47757184-2	chr17	47756401	47757600	Merged-chr17-47757368-2	E3
Merged-chr8-83740095-2	chr8	83740001	83740200	Merged-chr8-83740090-2	E2
Merged-chr8-87571071-2	chr8	87570801	87571200	Merged-chr8-87571141-2	E13
Merged-chr11-41645328-2	chr11	41645201	41645600	Merged-chr11-41645255-2	E5
Merged-chr1-86360922-2	chr1	86360201	86361400	Merged-chr1-86361044-2	E12
Merged-chr8-12926213-2	chr8	12924801	12927200	Merged-chr8-12926425-2	E3
Merged-chr7-63444936-2	chr7	63444401	63445600	Merged-chr7-63444871-2	E2
Merged-chr16-10651934-2	chr16	10651401	10652200	Merged-chr16-10652067-2	E7
Merged-chr1-181256827-2	chr1	181256401	181257800	Merged-chr1-181256553-2	E2
Merged-chr7-96928105-2	chr7	96928001	96928200	Merged-chr7-96928110-2	E15
Merged-chr11-71751260-2	chr11	71750401	71752000	Merged-chr11-71751319-1	E2
Merged-chr4-155136157-2	chr4	155136001	155136600	Merged-chr4-155136013-2	E3
Merged-chr4-148122547-2	chr4	148122201	148122800	Merged-chr4-148122594-2	E3
Merged-chr7-142240572-2	chr7	142240401	142240800	Merged-chr7-142240544-2	E5
Merged-chr5-140546171-2	chr5	140546001	140546600	Merged-chr5-140546041-1	E4
Merged-chr17-27329785-2	chr17	27329201	27330000	Merged-chr17-27329969-1	E3
Merged-chr17-87072386-2	chr17	87072201	87072600	Merged-chr17-87072371-2	E5
Merged-chr17-29842267-2	chr17	29842001	29842800	Merged-chr17-29842133-2	E2
Merged-chr19-44904477-2	chr19	44904201	44904600	Merged-chr19-44904553-2	E4
Merged-chr11-75165967-2	chr11	75165001	75167800	Merged-chr11-75165533-2	E2
Merged-chr7-102065175-2	chr7	102065001	102065400	Merged-chr7-102065150-2	E2
Merged-chr11-7468690-2	chr11	7468401	7469400	Merged-chr11-7468480-2	E16
Merged-chr17-35440509-2	chr17	35440401	35440800	Merged-chr17-35440418-2	E1
Merged-chr11-104526015-2	chr11	104512801	104534600	Merged-chr11-104528330-1	E9
Merged-chr4-57987702-2	chr4	57985601	57989000	Merged-chr4-57988104-2	E17
Merged-chr4-118543765-2	chr4	118542601	118544400	Merged-chr4-118544029-2	E2
Merged-chr8-107425009-2	chr8	107424601	107425200	Merged-chr8-107425117-2	E2
Merged-chr6-37658262-2	chr6	37658001	37658600	Merged-chr6-37658223-2	E13
Merged-chr17-9609278-2	chr17	9609201	9609400	Merged-chr17-9609256-2	E15
Merged-chr7-142173631-2	chr7	142169601	142175000	Merged-chr7-142174961-2	E17
Merged-chr11-55264518-2	chr11	55264401	55264600	Merged-chr11-55264536-2	E5
Merged-chr2-167672396-2	chr2	167672001	167672600	Merged-chr2-167672492-2	E14
Merged-chr7-4250696-2	chr7	4248201	4252000	Merged-chr7-4251291-2	E18
Merged-chr6-29435424-2	chr6	29433001	29436600	Merged-chr6-29436047-1	E2
Merged-chr5-146227643-2	chr5	146227401	146227800	Merged-chr5-146227685-1	E5
Merged-chr4-34239801-2	chr4	34239601	34240000	Merged-chr4-34239801-2	E5
Merged-chr14-104337000-2	chr14	104336801	104337200	Merged-chr14-104336999-2	E14
Merged-chr9-72653396-2	chr9	72653001	72653800	Merged-chr9-72653392-2	E13
Merged-chr7-142202555-2	chr7	142199401	142206000	Merged-chr7-142202409-2	E17
Merged-chr3-71568114-2	chr3	71567801	71568400	Merged-chr3-71568128-2	E15
Merged-chr11-101984515-2	chr11	101984201	101985200	Merged-chr11-101984329-2	E2
Merged-chr7-45226782-2	chr7	45226001	45228400	Merged-chr7-45226364-2	E9
Merged-chr3-96033315-2	chr3	96033201	96033600	Merged-chr3-96033230-2	E7
Merged-chr8-12991550-2	chr8	12991001	12992000	Merged-chr8-12991600-2	E7
Merged-chr7-19163994-2	chr7	19163801	19164200	Merged-chr7-19163987-1	E2
Merged-chr11-65158863-2	chr11	65158801	65159000	Merged-chr11-65158826-1	E3
Merged-chr8-47288843-2	chr8	47287201	47289600	Merged-chr8-47289286-1	E2
Merged-chr5-144371178-2	chr5	144370801	144371400	Merged-chr5-144371255-2	E3
Merged-chr8-81353594-2	chr8	81353401	81353800	Merged-chr8-81353587-2	E15
Merged-chr4-101455515-2	chr4	101454801	101456600	Merged-chr4-101455329-2	E7
Merged-chr13-48945274-2	chr13	48941801	48949800	Merged-chr13-48944747-2	E9
Merged-chr3-52990179-2	chr3	52990001	52990400	Merged-chr3-52990158-1	E13
Merged-chr9-98732229-2	chr9	98727801	98734800	Merged-chr9-98733158-2	E16
Merged-chr4-129862536-2	chr4	129862401	129862600	Merged-chr4-129862571-2	E4
Merged-chr11-99718908-2	chr11	99718801	99719000	Merged-chr11-99718916-2	E5
Merged-chr12-113335349-2	chr12	113334401	113336000	Merged-chr12-113335497-2	E5
Merged-chr4-145533318-2	chr4	145531401	145535000	Merged-chr4-145533436-1	E9
Merged-chr14-54383672-2	chr14	54383401	54383800	Merged-chr14-54383743-1	E13
Merged-chr10-72588362-2	chr10	72578001	72598000	Merged-chr10-72588723-2	E16
Merged-chr8-24381866-2	chr8	24381801	24382000	Merged-chr8-24381832-2	E6
Merged-chr11-53749968-2	chr11	53749801	53750400	Merged-chr11-53749835-2	E14
Merged-chr13-51631577-2	chr13	51631401	51631800	Merged-chr13-51631553-2	E13
Merged-chr13-51920759-2	chr13	51919801	51921800	Merged-chr13-51920717-2	E3
Merged-chr14-76631862-2	chr14	76631801	76632000	Merged-chr14-76631823-1	E3
Merged-chr1-11505497-2	chr1	11505401	11505600	Merged-chr1-11505493-2	E15
Merged-chr6-56652240-2	chr6	56652001	56652600	Merged-chr6-56652180-1	E2
Merged-chr1-133893426-2	chr1	133893201	133893800	Merged-chr1-133893351-2	E4
Merged-chr17-87234912-2	chr17	87233601	87235800	Merged-chr17-87235124-2	E6
Merged-chr14-27106031-2	chr14	27105601	27106600	Merged-chr14-27105961-1	E7
Merged-chr17-29056947-2	chr17	29056801	29057200	Merged-chr17-29056894-2	E2
Merged-chr3-146404602-2	chr3	146404201	146405200	Merged-chr3-146404504-2	E2
Merged-chr10-58924829-2	chr10	58920201	58929000	Merged-chr10-58925057-2	E17
Merged-chr17-28226169-2	chr17	28225801	28226400	Merged-chr17-28226237-1	E2
Merged-chr3-142394411-2	chr3	142394201	142394600	Merged-chr3-142394422-1	E13
Merged-chr5-138155578-2	chr5	138155401	138155800	Merged-chr5-138155556-1	E2
Merged-chr1-80403567-2	chr1	80403201	80403800	Merged-chr1-80403634-1	E15
Merged-chr9-44424768-2	chr9	44423401	44425800	Merged-chr9-44424935-2	E14
Merged-chr16-97815897-2	chr16	97815401	97816600	Merged-chr16-97815793-2	E7
Merged-chr4-123228535-2	chr4	123228401	123228800	Merged-chr4-123228470-2	E4
Merged-chr7-16004471-2	chr7	16003801	16004800	Merged-chr7-16004642-2	E8
Merged-chr13-112001421-2	chr13	112001201	112001800	Merged-chr13-112001342-2	E3
Merged-chr1-177555815-2	chr1	177555601	177556000	Merged-chr1-177555830-1	E3
Merged-chr9-47400697-2	chr9	47400601	47400800	Merged-chr9-47400693-2	E4
Merged-chr6-120665997-2	chr6	120665401	120666200	Merged-chr6-120666194-2	E2
Merged-chr7-139851598-2	chr7	139851001	139851800	Merged-chr7-139851795-2	E6
Merged-chr18-82477962-2	chr18	82476201	82480800	Merged-chr18-82477423-2	E1
Merged-chr11-119282653-2	chr11	119282201	119283000	Merged-chr11-119282706-2	E10
Merged-chr10-74989803-2	chr10	74988801	74990200	Merged-chr10-74990105-2	E4
Merged-chr4-44028434-2	chr4	44027801	44029000	Merged-chr4-44028467-2	E8
Merged-chr13-55936622-2	chr13	55936201	55936800	Merged-chr13-55936744-2	E17
Merged-chr8-20597123-2	chr8	20594001	20599400	Merged-chr8-20597545-1	E16
Merged-chr9-36950479-2	chr9	36950201	36950800	Merged-chr9-36950458-2	E3
Merged-chr16-30528039-2	chr16	30527801	30528200	Merged-chr16-30528078-2	E4
Merged-chr1-85492742-2	chr1	85481801	85499000	Merged-chr1-85495084-1	E16
Merged-chr7-144876889-2	chr7	144876801	144877000	Merged-chr7-144876877-2	E4
Merged-chr12-81776734-2	chr12	81775801	81778400	Merged-chr12-81776368-1	E10
Merged-chr14-34209686-2	chr14	34209201	34211000	Merged-chr14-34209271-2	E6
Merged-chr10-13641977-2	chr10	13641801	13642200	Merged-chr10-13641954-2	E15
Merged-chr5-142974803-2	chr5	142974601	142975000	Merged-chr5-142974805-1	E2
Merged-chr5-4054310-2	chr5	4054201	4054400	Merged-chr5-4054320-1	E7
Merged-chr10-63274025-2	chr10	63267601	63284000	Merged-chr10-63272249-1	E9
Merged-chr11-8492423-2	chr11	8492001	8493400	Merged-chr11-8492146-1	E8
Merged-chr11-11856985-2	chr11	11856401	11857200	Merged-chr11-11857169-2	E14
Merged-chr18-31776556-2	chr18	31771001	31779600	Merged-chr18-31777811-2	E9
Merged-chr16-3843165-2	chr16	3843001	3843400	Merged-chr16-3843130-2	E13
Merged-chr1-6458128-2	chr1	6457801	6458400	Merged-chr1-6458155-1	E15
Merged-chr6-91287052-2	chr6	91286601	91288000	Merged-chr6-91286803-1	E1
Merged-chr2-91904978-2	chr2	91904601	91905600	Merged-chr2-91904856-2	E8
Merged-chr11-103730796-2	chr11	103730601	103731200	Merged-chr11-103730691-1	E2
Merged-chr2-141312319-2	chr2	141312001	141312600	Merged-chr2-141312338-2	E5
Merged-chr4-85516177-2	chr4	85515201	85517000	Merged-chr4-85516254-1	E1
Merged-chr3-51416456-2	chr3	51415601	51417000	Merged-chr3-51416611-1	E2
Merged-chr1-189991283-2	chr1	189991201	189991400	Merged-chr1-189991265-2	E5
Merged-chr7-45639746-2	chr7	45639601	45640000	Merged-chr7-45639691-2	E2
Merged-chr2-157027472-2	chr2	157027401	157027600	Merged-chr2-157027443-2	E2
Merged-chr11-70652612-2	chr11	70652001	70653800	Merged-chr11-70652324-2	E12
Merged-chr9-102692810-2	chr9	102692201	102693600	Merged-chr9-102692719-2	E13
Merged-chr11-44333671-2	chr11	44333401	44334000	Merged-chr11-44333642-1	E15
Merged-chr9-37028307-2	chr9	37028201	37028400	Merged-chr9-37028314-1	E4
Merged-chr17-10330490-2	chr17	10330201	10330800	Merged-chr17-10330479-2	E14
Merged-chr9-47040239-2	chr9	47039201	47042400	Merged-chr9-47039678-2	E17
Merged-chr7-142280313-2	chr7	142280201	142280400	Merged-chr7-142280325-2	E4
Merged-chr2-105616726-2	chr2	105616601	105617000	Merged-chr2-105616652-1	E15
Merged-chrX-94122984-2	chrX	94122801	94123400	Merged-chrX-94122867-2	E2
Merged-chr2-161545761-2	chr2	161545401	161546400	Merged-chr2-161545622-2	E15
Merged-chr7-75141943-2	chr7	75141801	75142000	Merged-chr7-75141986-2	E15
Merged-chr10-14450291-2	chr10	14450201	14450400	Merged-chr10-14450281-1	E15
Merged-chr11-88689836-2	chr11	88689401	88690200	Merged-chr11-88689871-2	E2
Merged-chr2-75407445-2	chr2	75407001	75407600	Merged-chr2-75407589-2	E17
Merged-chr4-123071769-2	chr4	123071601	123072000	Merged-chr4-123071737-2	E3
Merged-chr17-25679718-2	chr17	25679401	25680000	Merged-chr17-25679735-2	E14
Merged-chr13-112578259-2	chr13	112578201	112578400	Merged-chr13-112578218-1	E5
Merged-chr9-66658855-2	chr9	66658401	66659200	Merged-chr9-66658910-2	E5
Merged-chr10-14968015-2	chr10	14967801	14968600	Merged-chr10-14967830-2	E14
Merged-chr9-121989452-2	chr9	121989201	121989600	Merged-chr9-121989504-2	E3
Merged-chr13-70379453-2	chr13	70379401	70379600	Merged-chr13-70379405-2	E5
Merged-chr6-120275000-2	chr6	120274801	120275200	Merged-chr6-120274999-1	E13
Merged-chr15-80367056-2	chr15	80367001	80367200	Merged-chr15-80367012-2	E3
Merged-chr11-114175905-2	chr11	114175601	114176200	Merged-chr11-114175910-2	E3
Merged-chr4-121241410-2	chr4	121240801	121241800	Merged-chr4-121241520-2	E15
Merged-chr1-152564957-2	chr1	152561801	152566200	Merged-chr1-152565914-2	E17
[truncated: 684 more rows]

## Sheet: Enrichment
State	ASCL1 peaks enrichment in each state	ASCL2 peaks enrichment in each state	MYOD1 peaks enrichment in each state	State	% of ASCL1 peaks enrichment in each state	% of ASCL2 peaks enrichment in each state	% of MYOD1 peaks enrichment in each state
[truncated: 18 more rows]
