# Supplementary material for: Intrinsic DNA binding properties demonstrated for lineage-specifying basic helix-loop-helix transcription factors
Source: HighWire-hosted journal article supplement (doi:10.1101/gr.224360.117), 2018-03-02
Supplement: Supplemental_Table_S4.xlsx [file Supplemental_Table_S4.xlsx]

## Sheet: Legend
Legend:
Attached sheets contain bHLH peaks that were classified as open or closed peaks based on ASCL1 ctrl ATAC-seq data
Open peaks are defined as peaks with uninduced cells ATAC-seq signal greater than or equal to the third quartile value of the correspodning set of bHLH peaks
Closed peaks are defined as peaks with uninduced cells ATAC-seq signal less than or equal to the first quartile value of the correspodning set of bHLH peaks

## Sheet: ASCL1_open
Chr	St	End	PeakID
chr13	84348162	84348330	chr13-46
chr2	39190915	39191083	chr2-121
chr18	43687736	43687904	chr18-18
chr1	3671694	3671862	chr1-91
chr4	95967014	95967182	chr4-201
chr6	7844589	7844757	chr6-125
chr2	18392757	18392925	chr2-146
chr11	20113040	20113208	chr11-161
chr13	32801918	32802086	chr13-146
chr2	113327692	113327860	chr2-102
chr6	149408899	149409067	chr6-123
chr1	193036037	193036205	chr1-78
chr10	111164566	111164734	chr10-44
chr6	39420482	39420650	chr6-107
chr13	41249757	41249925	chr13-31
chr2	84742738	84742906	chr2-179
chr10	57486323	57486491	chr10-62
chr13	64432417	64432585	chr13-38
chr4	80912022	80912190	chr4-35
chr5	18688617	18688785	chr5-39
chr4	143162139	143162307	chr4-90
chr17	52601307	52601475	chr17-26
chr15	63998122	63998290	chr15-89
chr11	3145021	3145189	chr11-8
chr10	4387055	4387223	chr10-50
chr17	10840216	10840384	chr17-93
chr15	10723736	10723904	chr15-102
chr11	40050637	40050805	chr11-87
chr7	17056225	17056393	chr7-185
chr7	72306609	72306777	chr7-168
chr1	17250892	17251060	chr1-92
chr3	14863255	14863423	chr3-120
chr11	30268056	30268224	chr11-299
chr17	36231473	36231641	chr17-22
chr4	109202258	109202426	chr4-112
chr16	88720167	88720335	chr16-96
chr17	75551837	75552005	chr17-70
chr9	75683847	75684015	chr9-63
chr8	32293184	32293352	chr8-100
chrX	143543279	143543447	chrX-5
chr19	55271615	55271783	chr19-43
chr18	31568869	31569037	chr18-46
chr3	127257710	127257878	chr3-63
chr17	66479840	66480008	chr17-27
chr10	52742806	52742974	chr10-89
chr12	113140337	113140505	chr12-21
chr1	52953177	52953345	chr1-138
chr8	101996903	101997071	chr8-186
chr11	67017904	67018072	chr11-175
chr9	25151621	25151789	chr9-134
chr6	5482448	5482616	chr6-20
chr14	122416330	122416498	chr14-25
chr10	67979623	67979791	chr10-94
chr5	14039300	14039468	chr5-63
chr6	116107792	116107960	chr6-92
chr2	112676825	112676993	chr2-21
chr2	150608573	150608741	chr2-219
chr4	109476514	109476682	chr4-113
chr5	81654114	81654282	chr5-40
chr7	12122620	12122788	chr7-219
chr13	101235370	101235538	chr13-108
chr3	144720185	144720353	chr3-45
chr8	41374543	41374711	chr8-58
chr4	135272976	135273144	chr4-87
chr19	11912250	11912418	chr19-15
chr6	129349853	129350021	chr6-119
chr10	96309221	96309389	chr10-31
chr6	70964178	70964346	chr6-86
chr10	3941533	3941701	chr10-116
chr12	41729936	41730104	chr12-30
chr4	134082040	134082208	chr4-170
chr6	122764869	122765037	chr6-45
chr13	63272714	63272882	chr13-45
chr5	60700088	60700256	chr5-27
chr4	13096390	13096558	chr4-189
chr9	113459018	113459186	chr9-257
chr9	17874948	17875116	chr9-92
chr1	91413278	91413446	chr1-74
chr6	102737339	102737507	chr6-153
chr5	53671551	53671719	chr5-92
chr6	67146059	67146227	chr6-54
chr9	69289787	69289955	chr9-113
chr7	3206621	3206789	chr7-93
chr16	8672100	8672268	chr16-57
chr15	22087047	22087215	chr15-104
chr7	58225843	58226011	chr7-41
chr5	36989212	36989380	chr5-141
chr13	11005554	11005722	chr13-70
chr8	56252469	56252637	chr8-47
chr8	68368409	68368577	chr8-53
chr17	72836173	72836341	chr17-77
chr5	18083896	18084064	chr5-157
chr9	92930673	92930841	chr9-126
chr17	37990666	37990834	chr17-214
chr14	65968612	65968780	chr14-36
chr4	94556793	94556961	chr4-44
chr15	52967927	52968095	chr15-38
chr15	28071231	28071399	chr15-64
chr2	128818265	128818433	chr2-105
chr12	116405058	116405226	chr12-94
chr6	115123381	115123549	chr6-155
chr2	112265778	112265946	chr2-94
chr11	9117153	9117321	chr11-260
chr4	57690816	57690984	chr4-50
chr16	42269378	42269546	chr16-128
chr9	37054251	37054419	chr9-41
chr1	192834776	192834944	chr1-160
chr11	9116328	9116496	chr11-222
chr1	167002589	167002757	chr1-254
chrX	142438151	142438319	chrX-20
chr7	6286556	6286724	chr7-116
chr8	112033166	112033334	chr8-71
chr3	84040162	84040330	chr3-68
chr2	135073138	135073306	chr2-89
chr17	37028931	37029099	chr17-79
chr13	9329462	9329630	chr13-11
chr16	93711861	93712029	chr16-140
chr6	149131195	149131363	chr6-22
chr5	134099641	134099809	chr5-85
chr10	49417498	49417666	chr10-59
chr9	90834150	90834318	chr9-125
chr11	47640805	47640973	chr11-303
chr5	125393206	125393374	chr5-71
chr3	6173809	6173977	chr3-112
chr15	8568724	8568892	chr15-8
chr9	8035660	8035828	chr9-51
chr1	72806256	72806424	chr1-170
chr17	12992563	12992731	chr17-141
chr3	68565177	68565345	chr3-97
chr13	14522219	14522387	chr13-14
chr15	91078196	91078364	chr15-34
chr4	114987222	114987390	chr4-161
chr16	30064124	30064292	chr16-24
chr8	54076366	54076534	chr8-101
chr4	26944718	26944886	chr4-64
chr5	23387048	23387216	chr5-87
chr17	33817635	33817803	chr17-44
chr1	47076574	47076742	chr1-104
chr8	27174649	27174817	chr8-161
chr3	22156462	22156630	chr3-18
chr10	117376944	117377112	chr10-45
chr13	38109188	38109356	chr13-16
chr2	150909662	150909830	chr2-289
chr7	19817566	19817734	chr7-48
chr4	10932509	10932677	chr4-57
chr6	122340763	122340931	chr6-57
chr5	118436813	118436981	chr5-243
chr7	85104632	85104800	chr7-50
chr9	114584740	114584908	chr9-116
chr12	28817422	28817590	chr12-8
chr9	120011306	120011474	chr9-23
chr7	101302080	101302248	chr7-99
chr1	74854858	74855026	chr1-141
chr11	20231216	20231384	chr11-162
chr7	65454457	65454625	chr7-166
chr6	49367767	49367935	chr6-141
chr13	54216067	54216235	chr13-19
chr3	75164919	75165087	chr3-12
chr6	34317530	34317698	chr6-105
chr17	57070848	57071016	chr17-38
chr12	103325488	103325656	chr12-112
chr17	15248108	15248276	chr17-86
chr3	66973800	66973968	chr3-95
chr12	40917546	40917714	chr12-17
chr5	134006793	134006961	chr5-128
chr9	13699429	13699597	chr9-213
chr12	27065084	27065252	chr12-47
chr10	128705110	128705278	chr10-75
chr6	146343061	146343229	chr6-79
chr3	137623967	137624135	chr3-85
chr14	123626428	123626596	chr14-35
chr8	122523375	122523543	chr8-62
chr3	67449783	67449951	chr3-96
chr1	194223122	194223290	chr1-192
chr17	88440708	88440876	chr17-136
chr15	31294521	31294689	chr15-23
chr7	63957018	63957186	chr7-49
chr1	167290072	167290240	chr1-157
chr12	99300093	99300261	chr12-33
chr1	146427014	146427182	chr1-30
chr8	75093533	75093701	chr8-87
chr9	52168795	52168963	chr9-230
chr11	93968199	93968367	chr11-185
chr2	61403302	61403470	chr2-122
chr9	25401038	25401206	chr9-106
chr4	116720897	116721065	chr4-74
chr11	55097890	55098058	chr11-268
chr19	12488202	12488370	chr19-50
chr16	3884435	3884603	chr16-75
chr15	38519358	38519526	chr15-18
chr18	81252050	81252218	chr18-11
chr16	87700092	87700260	chr16-61
chr2	152707710	152707878	chr2-95
chr10	21102114	21102282	chr10-102
chr1	86434470	86434638	chr1-42
chr14	55092365	55092533	chr14-43
chr7	79273222	79273390	chr7-143
chr8	13786107	13786275	chr8-54
chr2	44538246	44538414	chr2-174
chr17	87282831	87282999	chr17-234
chr5	108629641	108629809	chr5-68
chr19	21778122	21778290	chr19-79
chr8	69121560	69121728	chr8-17
chr1	78657533	78657701	chr1-175
chr1	138963264	138963432	chr1-132
chr1	66700674	66700842	chr1-140
chr14	122342211	122342379	chr14-46
chr9	122117089	122117257	chr9-99
chr17	66480346	66480514	chr17-132
chr4	94752545	94752713	chr4-200
chr15	102203431	102203599	chr15-55
chr1	71673774	71673942	chr1-217
chr6	143162314	143162482	chr6-21
chr17	42876666	42876834	chr17-40
chr13	85036021	85036189	chr13-40
chr14	122255546	122255714	chr14-8
chr11	5741253	5741421	chr11-167
chr13	95535624	95535792	chr13-68
chr2	132781472	132781640	chr2-215
chr8	114116231	114116399	chr8-144
chr9	106211383	106211551	chr9-167
chr10	110856108	110856276	chr10-64
chr17	13668701	13668869	chr17-105
chr10	36611479	36611647	chr10-67
chr2	109942143	109942311	chr2-157
chr8	3395286	3395454	chr8-73
chr11	26372063	26372231	chr11-241
chr6	59169045	59169213	chr6-65
chr10	120171555	120171723	chr10-197
chr17	89934078	89934246	chr17-41
chr1	190448365	190448533	chr1-4
chr3	101163514	101163682	chr3-34
chr7	16781157	16781325	chr7-118
chr1	54485005	54485173	chr1-17
chr2	38688915	38689083	chr2-99
chr14	45658003	45658171	chr14-39
chr15	103215289	103215457	chr15-16
chr6	118066637	118066805	chr6-157
chr1	11395523	11395691	chr1-45
chr1	176997967	176998135	chr1-115
chr6	134928581	134928749	chr6-94
chr9	83834195	83834363	chr9-95
chr1	101756585	101756753	chr1-126
chr9	102715116	102715284	chr9-147
chr12	76547933	76548101	chr12-60
chr3	146404405	146404573	chr3-86
chr11	28171372	28171540	chr11-169
chr7	3289240	3289408	chr7-183
chr1	64226394	64226562	chr1-214
chrX	153119099	153119267	chrX-7
chr9	108567147	108567315	chr9-19
chr15	25762347	25762515	chr15-48
chr9	20944039	20944207	chr9-155
chr9	124423498	124423666	chr9-172
chr11	117934378	117934546	chr11-415
chr1	59697838	59698006	chr1-25
chr12	29096065	29096233	chr12-79
chr7	30973698	30973866	chr7-94
chr8	4217423	4217591	chr8-116
chr19	59585909	59586077	chr19-66
chr2	119300149	119300317	chr2-65
chr6	35871461	35871629	chr6-48
chr2	32713229	32713397	chr2-198
chr5	70896647	70896815	chr5-225
chr17	70900732	70900900	chr17-111
chr17	79364779	79364947	chr17-134
chr9	57561216	57561384	chr9-232
chr5	144964900	144965068	chr5-264
chr6	120580237	120580405	chr6-16
chr2	26902929	26903097	chr2-148
chr8	85555379	85555547	chr8-135
chr7	19771296	19771464	chr7-224
chrX	20356301	20356469	chrX-14
chr7	82566837	82567005	chr7-203
chr16	17276257	17276425	chr16-14
chr5	30907809	30907977	chr5-34
chr1	60432631	60432799	chr1-106
chr1	106072220	106072388	chr1-236
chr7	126776830	126776998	chr7-101
chr11	100939454	100939622	chr11-280
chr6	97048619	97048787	chr6-43
chr4	83257372	83257540	chr4-94
chr17	45573311	45573479	chr17-91
chr7	106745879	106746047	chr7-145
chr10	25708099	25708267	chr10-28
chr2	172516596	172516764	chr2-59
chr6	122342261	122342429	chr6-68
chr18	17874622	17874790	chr18-58
chr10	115184883	115185051	chr10-26
chr4	5515461	5515629	chr4-123
chr8	69176435	69176603	chr8-7
chr17	47511353	47511521	chr17-74
chr3	28038186	28038354	chr3-74
chr2	27505655	27505823	chr2-149
chr7	127935527	127935695	chr7-56
chr17	6827952	6828120	chr17-139
chr10	128035452	128035620	chr10-65
chr7	75914121	75914289	chr7-7
chr17	47521727	47521895	chr17-127
chr4	101889583	101889751	chr4-268
chr8	4205360	4205528	chr8-64
chr4	40221097	40221265	chr4-92
chr2	126302460	126302628	chr2-88
chr2	20209450	20209618	chr2-239
chr7	95809817	95809985	chr7-243
chr6	134830459	134830627	chr6-169
chr6	142511634	142511802	chr6-7
chr9	54586220	54586388	chr9-121
chr15	41789211	41789379	chr15-105
chr15	102399624	102399792	chr15-30
chr5	119055661	119055829	chr5-83
chr13	29210910	29211078	chr13-94
chr13	86345385	86345553	chr13-41
chr1	44331916	44332084	chr1-207
chr3	72858935	72859103	chr3-131
chr17	90843190	90843358	chr17-82
chr4	43957531	43957699	chr4-83
chr5	102845056	102845224	chr5-93
chr8	71569503	71569671	chr8-75
chr7	112743811	112743979	chr7-147
chr4	75300699	75300867	chr4-157
chr16	17220377	17220545	chr16-68
chr1	84868958	84869126	chr1-41
chr10	46689894	46690062	chr10-105
chr5	92106577	92106745	chr5-79
chr7	107236929	107237097	chr7-64
chr2	180024524	180024692	chr2-313
chr1	86509505	86509673	chr1-43
chr19	50678320	50678488	chr19-94
chr14	54383659	54383827	chr14-41
chr15	84988100	84988268	chr15-71
chr8	122460720	122460888	chr8-21
chr1	146322942	146323110	chr1-153
chr11	20145495	20145663	chr11-102
chr3	108856933	108857101	chr3-22
chr4	105214578	105214746	chr4-52
chr7	133114912	133115080	chr7-150
chr5	38656365	38656533	chr5-21
chr7	130252271	130252439	chr7-70
chr14	25755283	25755451	chr14-29
chr10	25314229	25314397	chr10-51
chr19	40894593	40894761	chr19-89
chr3	84665641	84665809	chr3-51
chr18	35022535	35022703	chr18-60
chr2	20665701	20665869	chr2-73
chr6	65061098	65061266	chr6-85
chr6	136471004	136471172	chr6-95
chr5	151190174	151190342	chr5-202
chr13	24845072	24845240	chr13-50
chr2	128211935	128212103	chr2-183
chr18	38601588	38601756	chr18-78
chr16	9132842	9133010	chr16-30
chr11	4986888	4987056	chr11-292
chr6	87937542	87937710	chr6-150
chr17	56716871	56717039	chr17-102
chr3	89378483	89378651	chr3-138
chr2	116979870	116980038	chr2-111
chr2	138265315	138265483	chr2-160
chr13	94976553	94976721	chr13-84
chr5	135001361	135001529	chr5-26
chr11	87074016	87074184	chr11-184
chr13	112987478	112987646	chr13-111
chr5	43983243	43983411	chr5-165
chr7	49071299	49071467	chr7-14
chr7	140841322	140841490	chr7-66
chr2	131142807	131142975	chr2-214
chr7	3303494	3303662	chr7-184
chr18	10866359	10866527	chr18-21
chr6	72794938	72795106	chr6-13
chr16	21701961	21702129	chr16-115
chr8	108715297	108715465	chr8-28
chr8	120537317	120537485	chr8-51
chr3	137867283	137867451	chr3-40
chr9	31131763	31131931	chr9-177
chr15	59828584	59828752	chr15-107
chr4	129113188	129113356	chr4-39
chr5	75067276	75067444	chr5-168
chr1	72960299	72960467	chr1-171
chr5	110099104	110099272	chr5-59
chr10	85539513	85539681	chr10-23
chr4	136147912	136148080	chr4-104
chr17	28224121	28224289	chr17-37
chr7	45162244	45162412	chr7-68
chr1	7777276	7777444	chr1-194
chr8	37916524	37916692	chr8-120
chr4	45490074	45490242	chr4-84
chr10	86972117	86972285	chr10-60
chr14	32165625	32165793	chr14-65
chr7	19363970	19364138	chr7-19
chr8	94186630	94186798	chr8-27
chr9	102690180	102690348	chr9-76
chr14	48655060	48655228	chr14-40
chr19	42795409	42795577	chr19-42
chr3	22297924	22298092	chr3-26
chr12	26068202	26068370	chr12-39
chr18	73665524	73665692	chr18-48
chr1	53750102	53750270	chr1-61
chr1	194746980	194747148	chr1-90
chr2	161166685	161166853	chr2-163
chr1	153641552	153641720	chr1-58
chr3	8005814	8005982	chr3-114
chr12	100201942	100202110	chr12-45
chr19	11299663	11299831	chr19-34
chr9	31976305	31976473	chr9-109
chrX	95881199	95881367	chrX-16
chr5	137631351	137631519	chr5-37
chr2	101665483	101665651	chr2-101
chr8	84192095	84192263	chr8-133
chr19	24242295	24242463	chr19-59
chr9	119322287	119322455	chr9-259
chr16	32608704	32608872	chr16-54
chr5	37246429	37246597	chr5-164
chr7	70624614	70624782	chr7-167
chr6	20687140	20687308	chr6-46
chr5	60882493	60882661	chr5-221
chr1	17506821	17506989	chr1-39
chr8	118286036	118286204	chr8-72
chr12	72649945	72650113	chr12-25
chr7	80746497	80746665	chr7-25
chr13	107663919	107664087	chr13-69
chr12	17661619	17661787	chr12-54
chr6	119417565	119417733	chr6-160
chr9	22052023	22052191	chr9-68
chr17	32947551	32947719	chr17-124
chr4	6115936	6116104	chr4-124
chr10	94514788	94514956	chr10-186
chr6	125592160	125592328	chr6-23
chr9	78375037	78375205	chr9-143
chr8	90670832	90671000	chr8-48
chr17	56762209	56762377	chr17-68
chr4	13300254	13300422	chr4-24
chr3	12328498	12328666	chr3-54
chr7	16944475	16944643	chr7-16
chr5	18799638	18799806	chr5-52
chr13	113569678	113569846	chr13-92
chr11	63533623	63533791	chr11-174
chr1	16824857	16825025	chr1-137
chr4	117132014	117132182	chr4-38
chr10	122678484	122678652	chr10-46
chr9	31438984	31439152	chr9-108
chr5	104434106	104434274	chr5-123
chr2	167537938	167538106	chr2-144
chr6	99009922	99010090	chr6-44
chr12	100407394	100407562	chr12-34
chr11	29597246	29597414	chr11-242
chr1	12814493	12814661	chr1-53
chr2	105263349	105263517	chr2-27
chr17	24632548	24632716	chr17-63
chr15	6909815	6909983	chr15-47
chr2	154426686	154426854	chr2-48
chr10	47631658	47631826	chr10-22
chr2	105114135	105114303	chr2-110
chr14	52066268	52066436	chr14-33
chr10	128149618	128149786	chr10-66
chr7	131697044	131697212	chr7-178
chr12	40995806	40995974	chr12-57
chr12	86498794	86498962	chr12-43
chr11	62248818	62248986	chr11-205
chr9	122572440	122572608	chr9-206
chr15	84714934	84715102	chr15-158
chr2	181188858	181189026	chr2-56
chr5	81519491	81519659	chr5-48
chr7	16874824	16874992	chr7-104
chr5	129270301	129270469	chr5-113
chr4	155173593	155173761	chr4-41
chr12	84625132	84625300	chr12-36
chr2	104122523	104122691	chr2-137
chr8	94172358	94172526	chr8-70
chr11	73036940	73037108	chr11-120
chr16	16911968	16912136	chr16-26
chr11	9263171	9263339	chr11-295
chr15	59647966	59648134	chr15-136
chr10	121507464	121507632	chr10-56
chr9	99319719	99319887	chr9-146
chr13	59770320	59770488	chr13-101
chr19	10972907	10973075	chr19-41
chr19	23075896	23076064	chr19-36
chr5	8417580	8417748	chr5-132
chr3	75651741	75651909	chr3-134
chr1	132587047	132587215	chr1-151
chr11	95963502	95963670	chr11-279
chr11	74536311	74536479	chr11-148
chr7	97830920	97831088	chr7-53
chr14	27670070	27670238	chr14-47
chr12	6595643	6595811	chr12-96
chr12	100168271	100168439	chr12-52
chr11	115258224	115258392	chr11-138
chr12	82616780	82616948	chr12-42
chr14	78288918	78289086	chr14-11
chr14	24253978	24254146	chr14-16
chr9	116427588	116427756	chr9-128
chr4	56051956	56052124	chr4-196
chr7	108197051	108197219	chr7-112
chr6	119388390	119388558	chr6-159
chr8	84660292	84660460	chr8-67
chr6	89008962	89009130	chr6-38
chr8	106135189	106135357	chr8-18
chr6	91116520	91116688	chr6-51
chr14	57525456	57525624	chr14-48
chr14	47420028	47420196	chr14-71
chr11	75165487	75165655	chr11-183
chr3	9500849	9501017	chr3-47
chr13	111808662	111808830	chr13-110
chr8	107150541	107150709	chr8-191
chr5	23432857	23433025	chr5-158
chr6	83421984	83422152	chr6-6
chr10	67549278	67549446	chr10-49
chr7	29281935	29282103	chr7-75
chr5	142702048	142702216	chr5-130
chr2	146838668	146838836	chr2-161
chr1	192455143	192455311	chr1-77
chr5	25009928	25010096	chr5-88
chr16	31509076	31509244	chr16-35
chr5	147293365	147293533	chr5-46
chr13	51846490	51846658	chr13-64
chr4	55203855	55204023	chr4-93
chr3	18256636	18256804	chr3-121
chr13	99609408	99609576	chr13-35
chr11	98682505	98682673	chr11-186
chr1	64655580	64655748	chr1-107
chr5	34633784	34633952	chr5-91
chr13	45306378	45306546	chr13-120
chr11	29603687	29603855	chr11-135
chr14	25318026	25318194	chr14-92
chr9	65109498	65109666	chr9-82
chr12	21167878	21168046	chr12-29
chr8	70522994	70523162	chr8-85
chr7	19404043	19404211	chr7-223
chr12	25475517	25475685	chr12-38
chr11	61529302	61529470	chr11-136
chr6	139351092	139351260	chr6-172
chr2	84837231	84837399	chr2-24
chr15	80977726	80977894	chr15-45
chr15	78436946	78437114	chr15-17
chr18	54576766	54576934	chr18-12
chr13	64152304	64152472	chr13-21
chr4	130519947	130520115	chr4-32
chr1	63110637	63110805	chr1-54
chr13	112001270	112001438	chr13-89
chr2	106200306	106200474	chr2-156
chr17	47139749	47139917	chr17-81
chr10	11801963	11802131	chr10-118
chr6	38730560	38730728	chr6-8
chr13	17700540	17700708	chr13-140
chr8	89003461	89003629	chr8-12
chr6	122772829	122772997	chr6-117
chr3	86223634	86223802	chr3-25
chr1	74824959	74825127	chr1-46
chr2	167503304	167503472	chr2-143
chr3	11212401	11212569	chr3-37
chr5	3943259	3943427	chr5-74
chr9	49715198	49715366	chr9-137
chr9	14859996	14860164	chr9-214
chr11	33193787	33193955	chr11-266
chr2	102231537	102231705	chr2-75
chr4	48042780	48042948	chr4-255
chr17	45602096	45602264	chr17-52
chr9	93297369	93297537	chr9-165
chr7	37467006	37467174	chr7-13
chr17	12195301	12195469	chr17-84
chr2	92948033	92948201	chr2-154
chr13	113858768	113858936	chr13-132
chr14	61648743	61648911	chr14-60
chr15	38384383	38384551	chr15-24
chr1	94342656	94342824	chr1-232
chr4	126248621	126248789	chr4-59
chr2	3546729	3546897	chr2-119
chr11	43653153	43653321	chr11-126
chr3	98024397	98024565	chr3-60
chr1	86532026	86532194	chr1-111
chr1	89931101	89931269	chr1-84
chr2	30445449	30445617	chr2-153
chr5	30073565	30073733	chr5-161
chr7	35382995	35383163	chr7-43
chr9	121759540	121759708	chr9-170
chr8	106619577	106619745	chr8-19
chr7	112841962	112842130	chr7-173
chr1	74803111	74803279	chr1-121
chr2	152804412	152804580	chr2-11
chr1	59423003	59423171	chr1-33
chr15	27998870	27999038	chr15-63
chr15	85017077	85017245	chr15-98
chr8	46617064	46617232	chr8-123
chr10	13641858	13642026	chr10-25
chr7	29983654	29983822	chr7-135
chr4	3835369	3835537	chr4-239
chr2	146217313	146217481	chr2-70
chr17	17739966	17740134	chr17-36
chr2	59229353	59229521	chr2-133
chr17	70828979	70829147	chr17-110
chr4	58082734	58082902	chr4-197
chr10	79200088	79200256	chr10-175
chr13	95534246	95534414	chr13-67
chr7	49400727	49400895	chr7-69
chr16	14557275	14557443	chr16-48
chr11	22610335	22610503	chr11-263
chr6	39131604	39131772	chr6-33
chr9	76565788	76565956	chr9-75
chr11	31396840	31397008	chr11-201
chr9	111487249	111487417	chr9-200
chr1	153493510	153493678	chr1-86
chr8	83036854	83037022	chr8-131
chr16	93586588	93586756	chr16-99
chr12	108293103	108293271	chr12-64
chr6	136469189	136469357	chr6-170
chr8	79031002	79031170	chr8-128
chr11	3932039	3932207	chr11-221
chr15	25761857	25762025	chr15-77
chr10	108353050	108353218	chr10-137
chr18	18058739	18058907	chr18-36
chr14	50930471	50930639	chr14-58
chr6	60363866	60364034	chr6-31
chr15	36126836	36127004	chr15-84
chr17	48101024	48101192	chr17-163
chr5	117413554	117413722	chr5-50
chr7	111082719	111082887	chr7-127
chr7	19157492	19157660	chr7-221
chr4	148088036	148088204	chr4-54
chr5	65526216	65526384	chr5-77
chr11	97187731	97187899	chr11-212
chr1	189761888	189762056	chr1-136
chr4	138445076	138445244	chr4-172
chr9	45055164	45055332	chr9-182
chr4	152290601	152290769	chr4-234
chr4	149445396	149445564	chr4-55
chr10	21826852	21827020	chr10-103
chr13	3642158	3642326	chr13-13
chr2	126552434	126552602	chr2-124
chr11	94163059	94163227	chr11-154
chr1	86503364	86503532	chr1-95
chr5	61160273	61160441	chr5-76
chr5	28176721	28176889	chr5-137
chr17	9167219	9167387	chr17-115
chr4	4424679	4424847	chr4-240
chr5	34175437	34175605	chr5-75
chr16	4602332	4602500	chr16-76
chr10	77197483	77197651	chr10-39
chr17	15208080	15208248	chr17-95
chr13	49187328	49187496	chr13-122
chr16	30939953	30940121	chr16-86
chr18	25423746	25423914	chr18-96
chr10	95719549	95719717	chr10-10
chr13	99016821	99016989	chr13-56
chr3	96663586	96663754	chr3-80
chr9	41935700	41935868	chr9-181
chr3	144947291	144947459	chr3-158
chr8	105259700	105259868	chr8-77
chr11	4186455	4186623	chr11-339
chr13	95018096	95018264	chr13-27
chr14	45507160	45507328	chr14-14
chr10	3941058	3941226	chr10-36
chr11	16602973	16603141	chr11-343
chr4	142234971	142235139	chr4-26
chr11	120065403	120065571	chr11-133
chr17	15343183	15343351	chr17-144
chr19	47327999	47328167	chr19-3
chr6	125442766	125442934	chr6-52
chr3	91964634	91964802	chr3-140
chr16	14705315	14705483	chr16-107
chr4	55478056	55478224	chr4-155
chr15	76119191	76119359	chr15-50
chr17	79881271	79881439	chr17-55
chr3	66687233	66687401	chr3-32
chr1	189883052	189883220	chr1-101
chr8	69939738	69939906	chr8-66
chr2	102244579	102244747	chr2-155
chr10	14967715	14967883	chr10-87
chr4	124708975	124709143	chr4-68
chr12	36933285	36933453	chr12-49
chr8	89063488	89063656	chr8-88
chr17	47702700	47702868	chr17-220
chr13	66715809	66715977	chr13-17
chr9	79751979	79752147	chr9-243
chr8	124721846	124722014	chr8-150
chr19	47019389	47019557	chr19-11
chr2	68364254	68364422	chr2-46
chr16	18724796	18724964	chr16-39
chr16	13818530	13818698	chr16-38
chr15	73466712	73466880	chr15-67
chr5	134340115	134340283	chr5-114
chr5	134332909	134333077	chr5-151
chr4	6093474	6093642	chr4-46
chr18	77560646	77560814	chr18-83
chr3	35723639	35723807	chr3-44
chr3	90224463	90224631	chr3-33
chr16	30646226	30646394	chr16-71
chr3	101130624	101130792	chr3-106
chr6	4684978	4685146	chr6-98
chr17	23664643	23664811	chr17-118
chr12	91684362	91684530	chr12-111
chr17	31073337	31073505	chr17-58
chr9	96324858	96325026	chr9-195
chr1	91414160	91414328	chr1-12
chr17	41070923	41071091	chr17-80
chr5	135106738	135106906	chr5-99
chr4	101509007	101509175	chr4-101
chr14	122267682	122267850	chr14-12
chr3	129918521	129918689	chr3-13
chr1	88924256	88924424	chr1-48
chr16	89954566	89954734	chr16-97
chr1	75477515	75477683	chr1-122
chr17	35865701	35865869	chr17-78
chr15	102212044	102212212	chr15-46
chr10	93279165	93279333	chr10-183
chr6	54034586	54034754	chr6-49
chr5	31602452	31602620	chr5-103
chr1	180933764	180933932	chr1-116
chr8	117314660	117314828	chr8-146
chr10	8287391	8287559	chr10-5
chr6	113038619	113038787	chr6-15
chr16	82596490	82596658	chr16-22
chr1	182019824	182019992	chr1-189
chr8	45999187	45999355	chr8-74
chr18	14512268	14512436	chr18-73
chr10	20952043	20952211	chr10-119
chr9	15493130	15493298	chr9-215
chr14	117337374	117337542	chr14-113
chr2	155050652	155050820	chr2-66
chr14	34303333	34303501	chr14-57
chr14	28958710	28958878	chr14-19
chr12	86466315	86466483	chr12-20
chr18	65925199	65925367	chr18-24
chr15	62092560	62092728	chr15-137
chr18	65416605	65416773	chr18-79
chrX	12840297	12840465	chrX-26
chr11	74876946	74877114	chr11-231
chr6	39423376	39423544	chr6-76
chr13	17458033	17458201	chr13-139
chr1	182489842	182490010	chr1-134
chr7	141950447	141950615	chr7-269
chr9	31960599	31960767	chr9-120
chr15	84450613	84450781	chr15-97
chr19	4928132	4928300	chr19-29
chr13	19631056	19631224	chr13-59
chr9	114584179	114584347	chr9-202
chr7	29317686	29317854	chr7-230
chr6	38083268	38083436	chr6-37
chr14	75505266	75505434	chr14-55
chr12	69229386	69229554	chr12-69
chr4	153806328	153806496	chr4-22
chr4	45184688	45184856	chr4-28
chr9	66514191	66514359	chr9-94
chr6	24196570	24196738	chr6-47
chr17	65872775	65872943	chr17-226
chr17	10567494	10567662	chr17-83
chr8	111693297	111693465	chr8-42
chr4	133339148	133339316	chr4-286
chr5	12847203	12847371	chr5-102
chr14	58074927	58075095	chr14-59
chr16	77050469	77050637	chr16-134
chr8	70698317	70698485	chr8-56
chr10	88708824	88708992	chr10-135
chr1	89870600	89870768	chr1-112
chr8	45235334	45235502	chr8-122
chr10	7619801	7619969	chr10-145
chr5	122191646	122191814	chr5-249
chr18	82477350	82477518	chr18-5
chr1	181853102	181853270	chr1-51
chr8	120535532	120535700	chr8-81
chr16	20611439	20611607	chr16-43
chr18	36328645	36328813	chr18-76
chr8	70647440	70647608	chr8-126
chr8	70158403	70158571	chr8-125
chr16	25407212	25407380	chr16-40
chr16	18347873	18348041	chr16-42
chr2	157943974	157944142	chr2-299
chr1	46849844	46850012	chr1-103
chr5	104076465	104076633	chr5-172
chr10	118122020	118122188	chr10-24
chr2	154427879	154428047	chr2-16
chr16	13671749	13671917	chr16-66
chr10	24166233	24166401	chr10-58
chr1	153677670	153677838	chr1-247
chr14	56888012	56888180	chr14-44
chr7	79428317	79428485	chr7-169
chr13	5550291	5550459	chr13-134
chr6	125603244	125603412	chr6-58
chr11	66932836	66933004	chr11-230
chr5	140583981	140584149	chr5-101
chr17	56554366	56554534	chr17-101
chrX	68492114	68492282	chrX-29
chr7	4526321	4526489	chr7-74
chr11	97568774	97568942	chr11-179
chr14	118436861	118437029	chr14-28
chr5	128439920	128440088	chr5-9
chr3	86936329	86936497	chr3-78
chr2	133596667	133596835	chr2-280
chr5	136907997	136908165	chr5-191
chr5	145217742	145217910	chr5-86
chr3	98734457	98734625	chr3-81
chr9	71915934	71916102	chr9-114
chr7	100663265	100663433	chr7-172
chr5	102373721	102373889	chr5-235
chr12	72688363	72688531	chr12-24
chr13	26113551	26113719	chr13-43
chr11	88689801	88689969	chr11-232
chr5	43860685	43860853	chr5-66
chrX	156303871	156304039	chrX-8
chr10	33195955	33196123	chr10-52
chr5	43814599	43814767	chr5-105
chr13	99940640	99940808	chr13-80

## Sheet: ASCL1_closed
Chr	St	End	PeakID
chr17	36355523	36355691	chr17-34
chr2	143022656	143022824	chr2-284
chr9	72955893	72956061	chr9-242
chr9	61366332	61366500	chr9-53
chr8	125185110	125185278	chr8-202
chr12	24735104	24735272	chr12-68
chr17	30601333	30601501	chr17-121
chr11	99627979	99628147	chr11-165
chr12	110481298	110481466	chr12-115
chr6	88981726	88981894	chr6-18
chr19	45024780	45024948	chr19-7
chr2	31870798	31870966	chr2-8
chr11	100264504	100264672	chr11-398
chr1	179072260	179072428	chr1-10
chr13	9405583	9405751	chr13-135
chr4	136370029	136370197	chr4-293
chr11	108095120	108095288	chr11-408
chr1	38904287	38904455	chr1-205
chr8	13503361	13503529	chr8-10
chr9	58521400	58521568	chr9-65
chr4	142523492	142523660	chr4-53
chr7	29836951	29837119	chr7-76
chr13	96037443	96037611	chr13-175
chr11	108119872	108120040	chr11-11
chr11	51943173	51943341	chr11-361
chr5	123315344	123315512	chr5-95
chr3	100925294	100925462	chr3-19
chr12	27724739	27724907	chr12-32
chr6	119512056	119512224	chr6-78
chr8	72418538	72418706	chr8-106
chr11	6650624	6650792	chr11-294
chr16	89973896	89974064	chr16-136
chr4	134634305	134634473	chr4-135
chr2	127939356	127939524	chr2-76
chr15	99890895	99891063	chr15-40
chr9	106646736	106646904	chr9-97
chr4	62511613	62511781	chr4-265
chr1	189991204	189991372	chr1-2
chr16	9030135	9030303	chr16-9
chr8	122561597	122561765	chr8-196
chr15	84544123	84544291	chr15-156
chr3	58871925	58872093	chr3-4
chr17	31422114	31422282	chr17-17
chr15	34877104	34877272	chr15-33
chr16	97488365	97488533	chr16-29
chr15	36796955	36797123	chr15-43
chr8	111451986	111452154	chr8-11
chr19	31255932	31256100	chr19-5
chr2	34073396	34073564	chr2-36
chr12	80213905	80214073	chr12-15
chr5	36557049	36557217	chr5-163
chr7	58321518	58321686	chr7-232
chr11	99772582	99772750	chr11-322
chr17	13711952	13712120	chr17-177
chr17	30484835	30485003	chr17-190
chr17	28037055	28037223	chr17-187
chr17	71406582	71406750	chr17-228
chr4	107366569	107366737	chr4-1
chr17	11107192	11107360	chr17-94
chr7	38073133	38073301	chr7-120
chr11	50862978	50863146	chr11-359
chr4	134430535	134430703	chr4-287
chr18	23988956	23989124	chr18-95
chr9	105969295	105969463	chr9-127
chr15	37430991	37431159	chr15-86
chr19	45065925	45066093	chr19-51
chr5	137360706	137360874	chr5-193
chr7	100855449	100855617	chr7-246
chr11	85777355	85777523	chr11-313
chr13	40816119	40816287	chr13-150
chr3	53151719	53151887	chr3-3
chr9	61128179	61128347	chr9-5
chr4	154099477	154099645	chr4-236
chr17	49368318	49368486	chr17-128
chr10	85421385	85421553	chr10-133
chr2	164020867	164021035	chr2-304
chr4	125079466	125079634	chr4-278
chr15	64747080	64747248	chr15-139
chr8	122726982	122727150	chr8-44
chr7	126069857	126070025	chr7-55
chr18	81042264	81042432	chr18-34
chr11	55264457	55264625	chr11-203
chr6	100075855	100076023	chr6-88
chr4	136801555	136801723	chr4-210
chr9	21598503	21598671	chr9-216
chr16	27088168	27088336	chr16-120
chr17	31034206	31034374	chr17-199
chr11	99948859	99949027	chr11-18
chr17	37531596	37531764	chr17-90
chr10	69817076	69817244	chr10-166
chr11	33557212	33557380	chr11-352
chr16	45336581	45336749	chr16-131
chr5	149427819	149427987	chr5-8
chr16	93309097	93309265	chr16-10
chr4	45139973	45140141	chr4-19
chr15	101117001	101117169	chr15-15
chr8	106964587	106964755	chr8-37
chr11	118348537	118348705	chr11-237
chr2	129544666	129544834	chr2-212
chr9	46990342	46990510	chr9-229
chr11	3665472	3665640	chr11-338
chr1	33455360	33455528	chr1-199
chr13	36750803	36750971	chr13-149
chr4	152572448	152572616	chr4-2
chr12	105550519	105550687	chr12-3
chr10	85328085	85328253	chr10-2
chr2	168023645	168023813	chr2-19
chr7	134550499	134550667	chr7-71
chr11	101497077	101497245	chr11-196
chr18	81956580	81956748	chr18-35
chr3	76121732	76121900	chr3-50
chr7	34459886	34460054	chr7-136
chr2	92182278	92182446	chr2-265
chr5	148125023	148125191	chr5-198
chr9	44319045	44319213	chr9-225
chr10	116354474	116354642	chr10-141
chr11	94578967	94579135	chr11-391
chr17	29365389	29365557	chr17-188
chr17	30615953	30616121	chr17-194
chr4	140575018	140575186	chr4-11
chr9	41333264	41333432	chr9-22
chr10	28800987	28801155	chr10-7
chr11	99634786	99634954	chr11-33
chr10	57675830	57675998	chr10-19
chr1	43136554	43136722	chr1-24
chr4	130282946	130283114	chr4-30
chr11	60722798	60722966	chr11-147
chrX	103763250	103763418	chrX-9
chr5	53338634	53338802	chr5-107
chr10	7133115	7133283	chr10-100
chr8	125271470	125271638	chr8-151
chr1	59476757	59476925	chr1-211
chr5	127978657	127978825	chr5-186
chr11	88981246	88981414	chr11-389
chr15	98714000	98714168	chr15-163
chr6	19518864	19519032	chr6-126
chr9	112575318	112575486	chr9-256
chr14	21149841	21150009	chr14-87
chr16	90257245	90257413	chr16-137
chr16	15864193	15864361	chr16-108
chr14	62425324	62425492	chr14-22
chr13	102393676	102393844	chr13-24
chr9	120507836	120508004	chr9-71
chr9	65772398	65772566	chr9-112
chr1	133793213	133793381	chr1-242
chr5	146695622	146695790	chr5-154
chr15	96308179	96308347	chr15-160
chr1	171415919	171416087	chr1-256
chr5	52424850	52425018	chr5-219
chr11	112912998	112913166	chr11-409
chr6	100320710	100320878	chr6-1
chr13	100990746	100990914	chr13-1
chr6	97260028	97260196	chr6-4
chr17	49717734	49717902	chr17-24
chr5	37729092	37729260	chr5-10
chr5	26413034	26413202	chr5-11
chr5	107386573	107386741	chr5-12
chr2	152117212	152117380	chr2-37
chr7	19951882	19952050	chr7-29
chr6	127503245	127503413	chr6-59
chr2	135887956	135888124	chr2-114
chr2	155961969	155962137	chr2-126
chr9	63877631	63877799	chr9-237
chr11	6157257	6157425	chr11-341
chr12	43614323	43614491	chr12-102
chr12	86804858	86805026	chr12-87
chr15	77116381	77116549	chr15-145
chr1	37546959	37547127	chr1-203
chr15	76012840	76013008	chr15-7
chr14	47356722	47356890	chr14-15
chr11	52479631	52479799	chr11-72
chr11	69459911	69460079	chr11-48
chr11	99846790	99846958	chr11-143
chr7	139851675	139851843	chr7-65
chr11	62598356	62598524	chr11-173
chr8	123523945	123524113	chr8-63
chr1	75209862	75210030	chr1-173
chr5	148076858	148077026	chr5-197
chr12	84153296	84153464	chr12-85
chr10	117357538	117357706	chr10-194
chr16	13428964	13429132	chr16-5
chr10	77847637	77847805	chr10-3
chr11	61411318	61411486	chr11-246
chr9	6213007	6213175	chr9-173
chr10	127276388	127276556	chr10-115
chr2	104041753	104041921	chr2-268
chr11	99591134	99591302	chr11-38
chr15	83673125	83673293	chr15-57
chr1	189064937	189065105	chr1-135
chr4	152497108	152497276	chr4-148
chr10	43992208	43992376	chr10-79
chr9	66508051	66508219	chr9-191
chr11	107223115	107223283	chr11-407
chr8	18516845	18517013	chr8-156
chr9	102692652	102692820	chr9-196
chr1	131178879	131179047	chr1-65
chr5	100751740	100751908	chr5-234
chr9	22019246	22019414	chr9-176
chr2	31869788	31869956	chr2-32
chr5	149757205	149757373	chr5-20
chr4	142383360	142383528	chr4-48
chr16	22216345	22216513	chr16-27
chr7	67854720	67854888	chr7-107
chr4	153795175	153795343	chr4-150
chr11	114650714	114650882	chr11-253
chr10	63157492	63157660	chr10-93
chr2	79725837	79726005	chr2-205
chr3	88096320	88096488	chr3-102
chr5	141849760	141849928	chr5-262
chr8	120416419	120416587	chr8-148
chr17	56782036	56782204	chr17-130
chr18	35929194	35929362	chr18-101
chrX	136778143	136778311	chrX-24
chr14	61058411	61058579	chr14-104
chr18	82685325	82685493	chr18-116
chr10	13872763	13872931	chr10-147
chr15	36507889	36508057	chr15-10
chr2	157290678	157290846	chr2-222
chr2	129317949	129318117	chr2-277
chr6	39318574	39318742	chr6-138
chr17	15295515	15295683	chr17-143
chr4	140171505	140171673	chr4-4
chr3	84938124	84938292	chr3-8
chr2	107061589	107061757	chr2-78
chr7	80963689	80963857	chr7-81
chr17	29627097	29627265	chr17-66
chr11	99580829	99580997	chr11-214
chr9	91456562	91456730	chr9-164
chr15	27356703	27356871	chr15-78
chr2	146607789	146607957	chr2-288
chr13	18164245	18164413	chr13-141
chr7	90021308	90021476	chr7-238
chr16	33880661	33880829	chr16-124
chr3	138132747	138132915	chr3-154
chr5	36950456	36950624	chr5-55
chr3	108904808	108904976	chr3-149
chr6	24427342	24427510	chr6-42
chr4	119693220	119693388	chr4-205
chr1	108134816	108134984	chr1-237
chr14	31571537	31571705	chr14-6
chr15	99236206	99236374	chr15-3
chr2	168423229	168423397	chr2-10
chr4	129862501	129862669	chr4-21
chr2	166389672	166389840	chr2-33
chr1	27108856	27109024	chr1-26
chr5	101095588	101095756	chr5-25
chr6	118431617	118431785	chr6-29
chr7	139852240	139852408	chr7-35
chr10	81334445	81334613	chr10-33
chr15	101397013	101397181	chr15-29
chr11	117475045	117475213	chr11-199
chr7	139764159	139764327	chr7-113
chr5	21617769	21617937	chr5-116
chr4	151295674	151295842	chr4-184
chr11	21615586	21615754	chr11-262
chr11	85969497	85969665	chr11-248
chr3	45230944	45231112	chr3-128
chr3	75839336	75839504	chr3-135
chr4	48186592	48186760	chr4-256
chr4	140273292	140273460	chr4-213
chr5	113768635	113768803	chr5-239
chr17	10483616	10483784	chr17-175
chr19	25257596	25257764	chr19-60
chr2	77365771	77365939	chr2-261
chr5	33444328	33444496	chr5-212
chr5	128424367	128424535	chr5-253
chr11	19794707	19794875	chr11-345
chr11	78330582	78330750	chr11-312
chr4	151922153	151922321	chr4-56
chr7	127231452	127231620	chr7-176
chr2	8206991	8207159	chr2-234
chr5	130075194	130075362	chr5-256
chr4	124649656	124649824	chr4-276
chr14	33217613	33217781	chr14-66
chr5	110372155	110372323	chr5-3
chr17	46093247	46093415	chr17-23
chr11	99583346	99583514	chr11-27
chr11	59640364	59640532	chr11-29
chr5	114166302	114166470	chr5-22
chr7	132431481	132431649	chr7-46
chr19	58691386	58691554	chr19-20
chr2	32422268	32422436	chr2-82
chr10	41099824	41099992	chr10-47
chr4	132989090	132989258	chr4-116
chr5	134715624	134715792	chr5-189
chr15	102294327	102294495	chr15-167
chr18	6239246	6239414	chr18-90
chr4	123593841	123594009	chr4-274
chr5	27171990	27172158	chr5-211
chr8	71363412	71363580	chr8-175
chr18	21042628	21042796	chr18-94
chr7	81478387	81478555	chr7-30
chr17	28388663	28388831	chr17-1
chr7	135405724	135405892	chr7-151
chr2	28202388	28202556	chr2-130
chr1	172425396	172425564	chr1-260
chr17	45332678	45332846	chr17-215
chr7	29865298	29865466	chr7-2
chr5	111753626	111753794	chr5-4
chr10	72588669	72588837	chr10-12
chr5	116280561	116280729	chr5-14
chr1	89998790	89998958	chr1-36
chr2	163717031	163717199	chr2-96
chr16	17500247	17500415	chr16-80
chr1	172098054	172098222	chr1-259
chr5	107557042	107557210	chr5-173
chr8	46745203	46745371	chr8-166
chr9	58443158	58443326	chr9-233
chr6	53757117	53757285	chr6-143
chr10	76389559	76389727	chr10-170
chr8	116608065	116608233	chr8-3
chr16	32117842	32118010	chr16-17
chr13	52062714	52062882	chr13-34
chr1	89487831	89487999	chr1-57
chr1	12644724	12644892	chr1-118
chr11	60470723	60470891	chr11-368
chr14	121542963	121543131	chr14-7
chr17	87272623	87272791	chr17-61
chr17	46508430	46508598	chr17-99
chr14	64412842	64413010	chr14-61
chr1	158769550	158769718	chr1-251
chr2	168950844	168951012	chr2-308
chr5	134349325	134349493	chr5-258
chr10	44114563	44114731	chr10-69
chr9	96259775	96259943	chr9-145
chr17	8205269	8205437	chr17-9
chr11	117451682	117451850	chr11-5
chr11	118376485	118376653	chr11-28
chr5	134715183	134715351	chr5-57
chr1	89628402	89628570	chr1-96
chr14	46947754	46947922	chr14-53
chr16	90082197	90082365	chr16-62
chr6	27672985	27673153	chr6-100
chr2	179350945	179351113	chr2-231
chr8	110357904	110358072	chr8-140
chr14	11473604	11473772	chr14-80
chr1	83706945	83707113	chr1-223
chr7	43777895	43778063	chr7-8
chr15	100965066	100965234	chr15-26
chr16	38139185	38139353	chr16-127
chr17	58089510	58089678	chr17-225
chr11	69362102	69362270	chr11-137
chr11	101601009	101601177	chr11-187
chr1	86199149	86199317	chr1-110
chr7	46071172	46071340	chr7-125
chr2	70877560	70877728	chr2-256
chr2	165317484	165317652	chr2-305
chr5	41177201	41177369	chr5-217
chr5	49710318	49710486	chr5-218
chr8	124750549	124750717	chr8-201
chr14	39354888	39355056	chr14-97
chr19	3651505	3651673	chr19-68
chr1	136552844	136553012	chr1-245
chr3	101323450	101323618	chr3-144
chr2	31436342	31436510	chr2-35
chr16	30050965	30051133	chr16-16
chr10	95270996	95271164	chr10-55
chr2	106888958	106889126	chr2-270
chr8	128709880	128710048	chr8-206
chr15	86963079	86963247	chr15-159
chr18	76153824	76153992	chr18-66
chr1	193300482	193300650	chr1-267
chr5	117068847	117069015	chr5-180
chr2	164671047	164671215	chr2-6
chr5	101925825	101925993	chr5-6
chr8	84351049	84351217	chr8-23
chr12	104644811	104644979	chr12-22
chr3	96015766	96015934	chr3-31
chr8	107447843	107448011	chr8-61
chr5	124505168	124505336	chr5-112
chr17	27796854	27797022	chr17-96
chr4	134920124	134920292	chr4-208
chr2	72383891	72384059	chr2-257
chr9	60623597	60623765	chr9-188
chr10	100740244	100740412	chr10-188
chr16	44532133	44532301	chr16-130
chr10	87487465	87487633	chr10-134
chr1	60435615	60435783	chr1-213
chr10	58924943	58925111	chr10-70
chr2	166721894	166722062	chr2-164
chr5	17983142	17983310	chr5-206
chr17	7187129	7187297	chr17-10
chr1	187172024	187172192	chr1-23
chr4	115116524	115116692	chr4-270
chr15	78486653	78486821	chr15-4
chr1	154758928	154759096	chr1-9
chr10	90904267	90904435	chr10-6
chr5	35211504	35211672	chr5-23
chr15	98743828	98743996	chr15-53
chr3	33053212	33053380	chr3-91
chr7	46267191	46267359	chr7-199
chr17	50625119	50625287	chr17-165
chr5	104518986	104519154	chr5-237
chr6	53777787	53777955	chr6-144
chr6	38166080	38166248	chr6-106
chr14	71081442	71081610	chr14-106
chr19	21816278	21816446	chr19-46
chr19	53462592	53462760	chr19-95
chr9	62538026	62538194	chr9-189
chr1	74424080	74424248	chr1-3
chr1	120210929	120211097	chr1-14
chr2	105257780	105257948	chr2-41
chr4	48036317	48036485	chr4-33
chr6	39494255	39494423	chr6-26
chr15	76956773	76956941	chr15-51
chr2	91309616	91309784	chr2-135
chr5	30728965	30729133	chr5-118
chr3	154131133	154131301	chr3-110
chr8	72848030	72848198	chr8-107
chr10	118049320	118049488	chr10-195
chr11	70174511	70174679	chr11-376
chr11	112920246	112920414	chr11-410
chr15	41667035	41667203	chr15-130
chr17	80180553	80180721	chr17-230
chr15	12803236	12803404	chr15-125
chr15	54800928	54801096	chr15-133
chr10	77690453	77690621	chr10-14
chr15	81479437	81479605	chr15-79
chr13	64101563	64101731	chr13-167
chr11	70724483	70724651	chr11-1
chr3	9540509	9540677	chr3-1
chr18	83256010	83256178	chr18-9
chr11	99597874	99598042	chr11-89
chr16	21678927	21679095	chr16-18
chr9	65544908	65545076	chr9-61
chr18	74869224	74869392	chr18-25
chr2	130780736	130780904	chr2-80
chr16	16825068	16825236	chr16-25
chr9	36993399	36993567	chr9-110
chr11	99873652	99873820	chr11-217
chr13	59096739	59096907	chr13-55
chr15	79758904	79759072	chr15-61
chr4	117827200	117827368	chr4-102
chr11	51176216	51176384	chr11-202
chr8	23934758	23934926	chr8-83
chr9	120394422	120394590	chr9-117
chr5	31316461	31316629	chr5-138
chr1	158456405	158456573	chr1-184
chr3	47177470	47177638	chr3-76
chr10	21686456	21686624	chr10-120
chr11	23659718	23659886	chr11-298
chr14	100294894	100295062	chr14-78
chr1	15118189	15118357	chr1-197
chr4	57720369	57720537	chr4-260
chr7	23348960	23349128	chr7-225
chr7	142240364	142240532	chr7-272
chr7	142296512	142296680	chr7-182
chr11	54630989	54631157	chr11-363
chr11	78624521	78624689	chr11-382
chr19	4861101	4861269	chr19-69
chr4	135455026	135455194	chr4-291
chr7	92350070	92350238	chr7-240
chr7	134250275	134250443	chr7-263
chr8	57258933	57259101	chr8-168
chr12	111067725	111067893	chr12-117
chr13	45463614	45463782	chr13-154
chr14	70753647	70753815	chr14-105
chr16	42600141	42600309	chr16-129
chr19	24317903	24318071	chr19-82
chr2	84445774	84445942	chr2-262
chr5	140021888	140022056	chr5-261
chr10	74105695	74105863	chr10-169
chr16	13981794	13981962	chr16-106
chr8	110488433	110488601	chr8-90
chr2	30556631	30556799	chr2-131
chr7	97342518	97342686	chr7-204
chr13	21939007	21939175	chr13-142
chr1	161097079	161097247	chr1-44
chr2	105258537	105258705	chr2-17
chr2	128911870	128912038	chr2-106
chr7	142257775	142257943	chr7-115
chr18	11892335	11892503	chr18-53
chr6	120678834	120679002	chr6-116
chr16	46088474	46088642	chr16-132
chr12	88905081	88905249	chr12-110
chr6	149426272	149426440	chr6-176
chr17	34388176	34388344	chr17-13
chr13	57949593	57949761	chr13-3
chr2	180761888	180762056	chr2-22
chr4	154183227	154183395	chr4-23
chr15	88189459	88189627	chr15-22
chr8	41786047	41786215	chr8-31
chr14	12103357	12103525	chr14-32
chr7	142280725	142280893	chr7-91
chr5	132712876	132713044	chr5-97
chr18	67348174	67348342	chr18-38
chr14	43319037	43319205	chr14-67
chr16	32820683	32820851	chr16-89
chr18	42589203	42589371	chr18-62
chr1	154357651	154357819	chr1-248
chr3	10286508	10286676	chr3-119
chr3	159139165	159139333	chr3-161
chr4	129180059	129180227	chr4-284
chr5	78964810	78964978	chr5-228
chr9	106176378	106176546	chr9-197
chr11	16885140	16885308	chr11-344
chr13	25557428	25557596	chr13-145
chr13	111765222	111765390	chr13-180
chr17	41556676	41556844	chr17-159
chr8	68387552	68387720	chr8-171
chr11	70170342	70170510	chr11-375
chr12	42128062	42128230	chr12-101
chr17	87575519	87575687	chr17-235
chr19	24192681	24192849	chr19-81
chr8	68290211	68290379	chr8-170
chr17	32211601	32211769	chr17-42
chr18	84742430	84742598	chr18-86
chr6	92911570	92911738	chr6-151
chr4	81010363	81010531	chr4-266
chr16	23662543	23662711	chr16-118
chr7	45226292	45226460	chr7-5
chr7	64235406	64235574	chr7-10
chr17	49291063	49291231	chr17-20
chr9	62675918	62676086	chr9-37
chr2	170465668	170465836	chr2-49
chr5	116525679	116525847	chr5-41
chr1	154759471	154759639	chr1-38
chr18	82952997	82953165	chr18-26
chr3	52831207	52831375	chr3-42
chr17	73747745	73747913	chr17-112
chr6	51466959	51467127	chr6-110
chr1	83570285	83570453	chr1-222
chr5	136985674	136985842	chr5-192
chr6	55871775	55871943	chr6-146
chr11	99897580	99897748	chr11-397
chr17	24311395	24311563	chr17-185
chr6	132107573	132107741	chr6-168
chr11	99792767	99792935	chr11-396
chr19	18426677	18426845	chr19-78
chr4	8343223	8343391	chr4-241
chr5	113217743	113217911	chr5-16
chr12	99067262	99067430	chr12-16
chr14	92310069	92310237	chr14-110
chr15	47574123	47574291	chr15-131
chr16	35738048	35738216	chr16-125
chr17	17913785	17913953	chr17-180
chr8	70533285	70533453	chr8-5
chr10	77814742	77814910	chr10-40
chr7	100295985	100296153	chr7-171
chr2	167109611	167109779	chr2-189
chr3	87049524	87049692	chr3-100
chr4	43371850	43372018	chr4-194
chr7	70595366	70595534	chr7-201
chr19	37393177	37393345	chr19-61
chr10	116577201	116577369	chr10-192
chr11	69628300	69628468	chr11-374
chr2	18195528	18195696	chr2-238
chr10	61473188	61473356	chr10-162
chr10	77787956	77788124	chr10-174
chr17	25760010	25760178	chr17-50
chr4	130636795	130636963	chr4-103
chr14	89397201	89397369	chr14-109
chr16	91693280	91693448	chr16-1
chr16	8481769	8481937	chr16-2
chr2	18893430	18893598	chr2-13
chr12	99272898	99273066	chr12-19
chr7	35366274	35366442	chr7-28
chr5	139093645	139093813	chr5-129
chr2	32302698	32302866	chr2-197
chr2	46193561	46193729	chr2-251
chr9	40948869	40949037	chr9-221
chr5	82169311	82169479	chr5-230
chr2	26196933	26197101	chr2-241
chr3	137979544	137979712	chr3-152
chr17	88545146	88545314	chr17-236
chr15	58136789	58136957	chr15-134
chr8	72590715	72590883	chr8-25
chr8	12519730	12519898	chr8-6
chr11	99858207	99858375	chr11-17
chr3	54678900	54679068	chr3-10
chr11	116457386	116457554	chr11-220
chr10	84797657	84797825	chr10-111
chr17	28777892	28778060	chr17-148
chr4	137466231	137466399	chr4-295
chr5	111911250	111911418	chr5-175
chr10	82096366	82096534	chr10-182
chr4	50717610	50717778	chr4-257
chr19	6216186	6216354	chr19-72
chr13	52906489	52906657	chr13-160
chr11	52188548	52188716	chr11-267
chr13	108159693	108159861	chr13-131
chr1	67984992	67985160	chr1-216
chr12	84729716	84729884	chr12-18
chr15	58063442	58063610	chr15-49
chr9	9718294	9718462	chr9-211
chr4	135287473	135287641	chr4-290
chr16	20522466	20522634	chr16-8
chr14	46120938	46121106	chr14-70
chr1	99779772	99779940	chr1-234
chr9	100066012	100066180	chr9-251
chr14	56490593	56490761	chr14-102
chr17	48250281	48250449	chr17-223
chr4	35145383	35145551	chr4-248
chr18	63957528	63957696	chr18-108
chr1	176749395	176749563	chr1-262
chr7	19800364	19800532	chr7-42
chr18	81669203	81669371	chr18-2
chr10	42356630	42356798	chr10-123
chr2	50105641	50105809	chr2-252
chr4	37753402	37753570	chr4-193
chr16	11380199	11380367	chr16-105
chr10	21947470	21947638	chr10-149
chr2	25797634	25797802	chr2-61
chr12	108848206	108848374	chr12-114
chr10	123032152	123032320	chr10-34
chr10	116516298	116516466	chr10-191
chr15	64193694	64193862	chr15-108
chr11	59779933	59780101	chr11-366
chr4	26249776	26249944	chr4-191
chr8	79817945	79818113	chr8-130
chr5	134972343	134972511	chr5-259
chr18	35545485	35545653	chr18-100
chr11	49589041	49589209	chr11-228
chr5	77090417	77090585	chr5-227
chr8	122698474	122698642	chr8-24
chr15	38251109	38251277	chr15-20
chr5	24430830	24430998	chr5-159
chr10	60189329	60189497	chr10-127
chr7	142120606	142120774	chr7-270
chr13	118088010	118088178	chr13-183
chr12	102344548	102344716	chr12-6
chr8	27204398	27204566	chr8-14
chr1	187171533	187171701	chr1-100
chr9	39293366	39293534	chr9-157
chr15	84411185	84411353	chr15-96
chr4	11055994	11056162	chr4-188
chr10	111190789	111190957	chr10-113
chr15	77793175	77793343	chr15-91
chr2	11822082	11822250	chr2-235
chr2	165828877	165829045	chr2-225
chr11	65053201	65053369	chr11-308
chr13	87210555	87210723	chr13-172
chr15	78231106	78231274	chr15-111
chr16	71239020	71239188	chr16-72
chr17	84541314	84541482	chr17-233
chr19	33170840	33171008	chr19-84
chr19	46567329	46567497	chr19-92
chr2	40094101	40094269	chr2-250
chr17	45062460	45062628	chr17-161
chr6	35865182	35865350	chr6-137
chr11	78411319	78411487	chr11-381
chr2	17004908	17005076	chr2-167
chr1	65269536	65269704	chr1-215
chr10	12773827	12773995	chr10-146
chr11	97944644	97944812	chr11-250
chr9	64497330	64497498	chr9-8
chr4	134973030	134973198	chr4-9
chr2	169421508	169421676	chr2-12
chr4	119395564	119395732	chr4-16
chr10	42163778	42163946	chr10-8
chr17	8347004	8347172	chr17-29
chr9	120291875	120292043	chr9-44
chr3	86993212	86993380	chr3-15
chr10	111191123	111191291	chr10-20
chr16	91067228	91067396	chr16-21
chr13	107858238	107858406	chr13-22
chr17	66546526	66546694	chr17-53
chr9	119709993	119710161	chr9-83
chr4	59610530	59610698	chr4-58
chr7	142212112	142212280	chr7-73
chr19	46373789	46373957	chr19-30
chr1	125390052	125390220	chr1-75
chr11	4940352	4940520	chr11-239
chr17	66545960	66546128	chr17-103
chr2	29934471	29934639	chr2-195
chr2	70819644	70819812	chr2-177
chr2	91420536	91420704	chr2-206
chr3	58591712	58591880	chr3-77
chr9	45274156	45274324	chr9-183
chr10	113224972	113225140	chr10-139
chr13	67299660	67299828	chr13-126
chr17	80231401	80231569	chr17-135
chr1	164018086	164018254	chr1-252
chr1	174808191	174808359	chr1-261
chr2	121826244	121826412	chr2-182
chr3	56589230	56589398	chr3-130
chr3	144639506	144639674	chr3-157
chr4	59506031	59506199	chr4-262
chr4	151621708	151621876	chr4-146
chr5	115034310	115034478	chr5-178
chr5	147297340	147297508	chr5-265
chr6	51438424	51438592	chr6-142
chr6	149315560	149315728	chr6-175
chr7	81987386	81987554	chr7-236
chr8	25142730	25142898	chr8-160
chr9	45256787	45256955	chr9-228
chr10	77742327	77742495	chr10-173
chr11	78956249	78956417	chr11-383
chr12	44981193	44981361	chr12-103
chr14	56098580	56098748	chr14-101
chr15	100770479	100770647	chr15-119
chr15	102083491	102083659	chr15-165
chr16	34404397	34404565	chr16-90
chr17	35141222	35141390	chr17-158
chr18	27103867	27104035	chr18-74
chr1	131536430	131536598	chr1-240
chr2	30158182	30158350	chr2-247
chr3	147570559	147570727	chr3-159
chr4	128205059	128205227	chr4-283
chr6	93882037	93882205	chr6-152
chr7	90171879	90172047	chr7-239
chr8	10223295	10223463	chr8-152
chr9	44891240	44891408	chr9-227
chr10	44607212	44607380	chr10-153
chr10	59159735	59159903	chr10-159
chr14	20468814	20468982	chr14-85
chr15	98248365	98248533	chr15-162
chr16	22341391	22341559	chr16-116
chr2	155314729	155314897	chr2-294
chr4	107691900	107692068	chr4-269
chr5	81074472	81074640	chr5-229
chr11	40751045	40751213	chr11-355
chr13	5169453	5169621	chr13-133
chr12	111953900	111954068	chr12-92
chr8	105833850	105834018	chr8-13
chr9	121932616	121932784	chr9-49
chr11	99864761	99864929	chr11-104
chr11	99785335	99785503	chr11-113
chr15	98886770	98886938	chr15-36
chr11	61081667	61081835	chr11-172
chr7	66350525	66350693	chr7-80
chr3	103461060	103461228	chr3-53
chr11	99798387	99798555	chr11-216
chr8	119851814	119851982	chr8-80
chr11	36376995	36377163	chr11-244
chr17	30324281	30324449	chr17-108
chr4	133526731	133526899	chr4-169
chr6	52290629	52290797	chr6-112
chr12	51911447	51911615	chr12-80
chr16	13891642	13891810	chr16-79
chr1	9671578	9671746	chr1-195
chr2	35085131	35085299	chr2-248
chr2	53209724	53209892	chr2-253
chr2	166980291	166980459	chr2-307
chr3	104876673	104876841	chr3-147
chr4	58780759	58780927	chr4-261
chr4	127600305	127600473	chr4-282
chr5	65644357	65644525	chr5-224
chr6	61334208	61334376	chr6-148
chr6	118474462	118474630	chr6-158
chr8	91337751	91337919	chr8-184
chr9	66640224	66640392	chr9-240
chr9	90899303	90899471	chr9-246
chr11	86322499	86322667	chr11-386
chr18	76712996	76713164	chr18-112
chr19	11400133	11400301	chr19-77
chr1	155315140	155315308	chr1-249
chr2	90806133	90806301	chr2-263
chr5	149452927	149453095	chr5-267
chr9	59902434	59902602	chr9-234
chr9	87453146	87453314	chr9-244
chr9	108549139	108549307	chr9-254
chr12	40400104	40400272	chr12-100
chr15	75669895	75670063	chr15-140
chr8	83584850	83585018	chr8-2
chr11	116499989	116500157	chr11-234
chr9	57823448	57823616	chr9-186
chr13	97507879	97508047	chr13-129
chr7	92628285	92628453	chr7-241
chr19	38875929	38876097	chr19-88
chr15	94724726	94724894	chr15-82
chr10	12160161	12160329	chr10-101
chr2	17706001	17706169	chr2-236
chr7	110545100	110545268	chr7-250
chr9	3442745	3442913	chr9-210

## Sheet: ASCL2_open
Chr	St	End	PeakID
chr13	84348186	84348334	Merged-chr13-84348260-2
chr13	81633208	81633356	Merged-chr13-81633282-1
chr16	65815163	65815311	Merged-chr16-65815237-2
chr1	143777164	143777312	Merged-chr1-143777238-1
chr13	75707434	75707582	Merged-chr13-75707508-1
chr2	39190924	39191072	Merged-chr2-39190998-2
chr7	92670282	92670430	Merged-chr7-92670356-2
chr1	162570672	162570820	Merged-chr1-162570746-1
chr1	193036039	193036187	Merged-chr1-193036113-1
chr18	43687753	43687901	Merged-chr18-43687827-2
chr15	25984260	25984408	Merged-chr15-25984334-2
chr11	20113101	20113249	Merged-chr11-20113175-2
chr18	49832633	49832781	Merged-chr18-49832707-2
chr18	23041813	23041961	Merged-chr18-23041887-2
chr10	111164570	111164718	Merged-chr10-111164644-2
chr7	97332298	97332446	Merged-chr7-97332372-2
chr2	113327733	113327881	Merged-chr2-113327807-1
chr10	5922360	5922508	Merged-chr10-5922434-1
chr4	40143326	40143474	Merged-chr4-40143400-2
chr13	76384176	76384324	Merged-chr13-76384250-2
chr5	18688655	18688803	Merged-chr5-18688729-2
chr4	15881185	15881333	Merged-chr4-15881259-1
chr6	60828772	60828920	Merged-chr6-60828846-1
chr9	100643320	100643468	Merged-chr9-100643394-2
chr9	75683873	75684021	Merged-chr9-75683947-2
chr9	37657359	37657507	Merged-chr9-37657433-1
chr4	80912026	80912174	Merged-chr4-80912100-2
chr14	100750275	100750423	Merged-chr14-100750349-2
chr4	19709063	19709211	Merged-chr4-19709137-1
chr13	41249766	41249914	Merged-chr13-41249840-2
chr16	3872495	3872643	Merged-chr16-3872569-2
chr2	146855851	146855999	Merged-chr2-146855925-2
chr10	4387103	4387251	Merged-chr10-4387177-2
chr11	87592138	87592286	Merged-chr11-87592212-1
chr13	108214298	108214446	Merged-chr13-108214372-1
chr13	89739383	89739531	Merged-chr13-89739457-1
chr5	34660278	34660426	Merged-chr5-34660352-1
chr4	78212096	78212244	Merged-chr4-78212170-1
chr10	52742832	52742980	Merged-chr10-52742906-2
chr3	7366549	7366697	Merged-chr3-7366623-1
chr13	12340844	12340992	Merged-chr13-12340918-1
chr11	29692966	29693114	Merged-chr11-29693040-2
chr8	3279505	3279653	Merged-chr8-3279579-2
chr1	194619833	194619981	Merged-chr1-194619907-1
chr11	40050618	40050766	Merged-chr11-40050692-2
chr10	50592640	50592788	Merged-chr10-50592714-1
chr1	125435842	125435990	Merged-chr1-125435916-1
chrX	143543262	143543410	Merged-chrX-143543336-2
chr3	65659178	65659326	Merged-chr3-65659252-2
chr4	88938488	88938636	Merged-chr4-88938562-2
chr7	17056175	17056323	Merged-chr7-17056249-1
chr7	133115051	133115199	Merged-chr7-133115125-1
chr13	100786653	100786801	Merged-chr13-100786727-2
chr5	8368160	8368308	Merged-chr5-8368234-2
chr11	16591595	16591743	Merged-chr11-16591669-2
chr3	141931444	141931592	Merged-chr3-141931518-2
chr8	46470956	46471104	Merged-chr8-46471030-1
chr5	43948148	43948296	Merged-chr5-43948222-1
chr19	11912298	11912446	Merged-chr19-11912372-2
chr8	32009602	32009750	Merged-chr8-32009676-2
chr2	113829037	113829185	Merged-chr2-113829111-1
chr10	105841225	105841373	Merged-chr10-105841299-1
chr11	9011112	9011260	Merged-chr11-9011186-2
chr5	8243366	8243514	Merged-chr5-8243440-2
chr6	56652134	56652282	Merged-chr6-56652208-1
chr3	125938491	125938639	Merged-chr3-125938565-2
chr2	18392631	18392779	Merged-chr2-18392705-2
chr4	8647216	8647364	Merged-chr4-8647290-2
chr4	54073080	54073228	Merged-chr4-54073154-1
chr18	31568885	31569033	Merged-chr18-31568959-1
chr1	119305479	119305627	Merged-chr1-119305553-2
chr7	100607420	100607568	Merged-chr7-100607494-1
chr10	96309153	96309301	Merged-chr10-96309227-1
chr3	127257702	127257850	Merged-chr3-127257776-1
chr12	117450285	117450433	Merged-chr12-117450359-2
chr2	44927585	44927733	Merged-chr2-44927659-2
chr16	65815474	65815622	Merged-chr16-65815548-2
chr17	15990336	15990484	Merged-chr17-15990410-2
chr3	146852335	146852483	Merged-chr3-146852409-1
chr9	95407222	95407370	Merged-chr9-95407296-1
chr17	66479840	66479988	Merged-chr17-66479914-2
chr19	4510420	4510568	Merged-chr19-4510494-2
chr5	60700105	60700253	Merged-chr5-60700179-2
chr8	68368475	68368623	Merged-chr8-68368549-2
chr10	30803147	30803295	Merged-chr10-30803221-2
chr17	52601370	52601518	Merged-chr17-52601444-2
chr11	6444693	6444841	Merged-chr11-6444767-1
chr1	52953215	52953363	Merged-chr1-52953289-2
chr5	81654155	81654303	Merged-chr5-81654229-2
chr7	66689925	66690073	Merged-chr7-66689999-2
chr4	143162079	143162227	Merged-chr4-143162153-2
chr5	146794937	146795085	Merged-chr5-146795011-1
chr4	53440389	53440537	Merged-chr4-53440463-2
chr6	145211181	145211329	Merged-chr6-145211255-2
chr15	91078184	91078332	Merged-chr15-91078258-1
chr10	3941544	3941692	Merged-chr10-3941618-1
chr7	19716056	19716204	Merged-chr7-19716130-2
chr14	122255571	122255719	Merged-chr14-122255645-2
chr6	148444410	148444558	Merged-chr6-148444484-2
chr10	123076497	123076645	Merged-chr10-123076571-2
chr6	67146094	67146242	Merged-chr6-67146168-2
chr2	138265361	138265509	Merged-chr2-138265435-2
chr7	88130181	88130329	Merged-chr7-88130255-2
chr9	106887221	106887369	Merged-chr9-106887295-1
chr3	75164959	75165107	Merged-chr3-75165033-1
chr8	56252470	56252618	Merged-chr8-56252544-2
chr12	108792999	108793147	Merged-chr12-108793073-1
chr2	135658537	135658685	Merged-chr2-135658611-1
chr4	144404499	144404647	Merged-chr4-144404573-2
chr4	94752626	94752774	Merged-chr4-94752700-1
chr4	109676710	109676858	Merged-chr4-109676784-2
chr4	135273030	135273178	Merged-chr4-135273104-2
chr17	17624962	17625110	Merged-chr17-17625036-2
chr10	89443551	89443699	Merged-chr10-89443625-2
chr3	21935949	21936097	Merged-chr3-21936023-2
chr9	94670412	94670560	Merged-chr9-94670486-2
chr6	124741138	124741286	Merged-chr6-124741212-1
chr15	38518337	38518485	Merged-chr15-38518411-1
chr4	109476516	109476664	Merged-chr4-109476590-1
chr7	41451958	41452106	Merged-chr7-41452032-1
chr1	192834769	192834917	Merged-chr1-192834843-2
chr7	105581252	105581400	Merged-chr7-105581326-1
chr10	67979689	67979837	Merged-chr10-67979763-2
chr5	149053171	149053319	Merged-chr5-149053245-1
chr10	7589740	7589888	Merged-chr10-7589814-1
chr5	52471166	52471314	Merged-chr5-52471240-2
chr15	8568731	8568879	Merged-chr15-8568805-2
chr1	132417487	132417635	Merged-chr1-132417561-2
chr2	152177467	152177615	Merged-chr2-152177541-1
chr4	57956607	57956755	Merged-chr4-57956681-1
chr12	28817461	28817609	Merged-chr12-28817535-2
chr5	145280376	145280524	Merged-chr5-145280450-2
chr9	25151590	25151738	Merged-chr9-25151664-1
chr10	29146881	29147029	Merged-chr10-29146955-1
chr17	75551821	75551969	Merged-chr17-75551895-1
chr2	38287188	38287336	Merged-chr2-38287262-1
chr5	134006820	134006968	Merged-chr5-134006894-1
chr10	49417545	49417693	Merged-chr10-49417619-2
chr11	6895184	6895332	Merged-chr11-6895258-1
chr4	26944758	26944906	Merged-chr4-26944832-1
chr18	49755297	49755445	Merged-chr18-49755371-2
chr5	134688836	134688984	Merged-chr5-134688910-2
chr9	89704784	89704932	Merged-chr9-89704858-2
chr2	112676840	112676988	Merged-chr2-112676914-2
chr17	30576405	30576553	Merged-chr17-30576479-1
chr1	86526375	86526523	Merged-chr1-86526449-2
chr6	59169078	59169226	Merged-chr6-59169152-2
chr17	44105809	44105957	Merged-chr17-44105883-2
chr12	113140323	113140471	Merged-chr12-113140397-2
chr12	72761113	72761261	Merged-chr12-72761187-1
chr18	65565792	65565940	Merged-chr18-65565866-1
chr1	118459135	118459283	Merged-chr1-118459209-1
chr15	38519390	38519538	Merged-chr15-38519464-2
chr14	8214121	8214269	Merged-chr14-8214195-2
chr14	8403452	8403600	Merged-chr14-8403526-1
chr19	14835800	14835948	Merged-chr19-14835874-2
chr9	69289851	69289999	Merged-chr9-69289925-2
chr16	13818651	13818799	Merged-chr16-13818725-1
chr3	143100907	143101055	Merged-chr3-143100981-2
chr3	144720167	144720315	Merged-chr3-144720241-1
chr17	15248097	15248245	Merged-chr17-15248171-2
chr8	40939232	40939380	Merged-chr8-40939306-2
chr11	40600231	40600379	Merged-chr11-40600305-2
chr12	86884986	86885134	Merged-chr12-86885060-2
chr13	73603957	73604105	Merged-chr13-73604031-2
chr1	66468051	66468199	Merged-chr1-66468125-1
chr16	35490845	35490993	Merged-chr16-35490919-2
chr1	91413305	91413453	Merged-chr1-91413379-2
chr6	5482527	5482675	Merged-chr6-5482601-2
chr2	112265750	112265898	Merged-chr2-112265824-1
chr12	116281459	116281607	Merged-chr12-116281533-1
chr11	3409112	3409260	Merged-chr11-3409186-1
chr16	4679801	4679949	Merged-chr16-4679875-1
chr14	103650955	103651103	Merged-chr14-103651029-2
chr6	24955553	24955701	Merged-chr6-24955627-2
chr9	17874922	17875070	Merged-chr9-17874996-1
chr9	8035700	8035848	Merged-chr9-8035774-2
chr17	37028968	37029116	Merged-chr17-37029042-1
chrX	95711998	95712146	Merged-chrX-95712072-2
chr1	11401288	11401436	Merged-chr1-11401362-2
chr14	122416352	122416500	Merged-chr14-122416426-2
chr2	140671300	140671448	Merged-chr2-140671374-2
chr2	10048660	10048808	Merged-chr2-10048734-1
chr8	40511790	40511938	Merged-chr8-40511864-1
chr10	94426471	94426619	Merged-chr10-94426545-1
chr12	103325526	103325674	Merged-chr12-103325600-2
chr1	165194351	165194499	Merged-chr1-165194425-2
chr13	60177755	60177903	Merged-chr13-60177829-2
chr3	148989797	148989945	Merged-chr3-148989871-2
chr6	142756607	142756755	Merged-chr6-142756681-1
chr10	128909705	128909853	Merged-chr10-128909779-1
chr17	72836157	72836305	Merged-chr17-72836231-1
chr3	68565220	68565368	Merged-chr3-68565294-2
chr10	17723170	17723318	Merged-chr10-17723244-1
chr16	93711859	93712007	Merged-chr16-93711933-2
chr15	25762403	25762551	Merged-chr15-25762477-1
chr12	12177654	12177802	Merged-chr12-12177728-2
chr1	167002585	167002733	Merged-chr1-167002659-1
chr16	58670475	58670623	Merged-chr16-58670549-1
chr6	70964224	70964372	Merged-chr6-70964298-2
chr8	128654607	128654755	Merged-chr8-128654681-1
chr11	67017868	67018016	Merged-chr11-67017942-2
chr2	18998126	18998274	Merged-chr2-18998200-2
chr2	135073131	135073279	Merged-chr2-135073205-2
chr5	142962043	142962191	Merged-chr5-142962117-1
chr2	59612001	59612149	Merged-chr2-59612075-2
chr5	92042465	92042613	Merged-chr5-92042539-2
chr15	28071255	28071403	Merged-chr15-28071329-2
chr5	93093396	93093544	Merged-chr5-93093470-2
chr7	98361523	98361671	Merged-chr7-98361597-1
chr5	146230989	146231137	Merged-chr5-146231063-2
chr17	72603232	72603380	Merged-chr17-72603306-1
chr5	98256089	98256237	Merged-chr5-98256163-2
chr14	7954105	7954253	Merged-chr14-7954179-2
chr10	46689946	46690094	Merged-chr10-46690020-2
chr4	114987162	114987310	Merged-chr4-114987236-2
chr17	89934086	89934234	Merged-chr17-89934160-2
chr15	36609006	36609154	Merged-chr15-36609080-1
chr2	163054623	163054771	Merged-chr2-163054697-1
chr17	33817650	33817798	Merged-chr17-33817724-1
chr9	102726392	102726540	Merged-chr9-102726466-1
chr9	59578308	59578456	Merged-chr9-59578382-1
chr13	23738824	23738972	Merged-chr13-23738898-2
chr3	136669598	136669746	Merged-chr3-136669672-2
chr4	10694441	10694589	Merged-chr4-10694515-1
chr7	126884986	126885134	Merged-chr7-126885060-1
chr2	136890995	136891143	Merged-chr2-136891069-2
chr1	17506866	17507014	Merged-chr1-17506940-2
chr7	19817537	19817685	Merged-chr7-19817611-2
chr7	54645523	54645671	Merged-chr7-54645597-2
chr9	114401037	114401185	Merged-chr9-114401111-2
chr4	35226147	35226295	Merged-chr4-35226221-1
chr11	3290207	3290355	Merged-chr11-3290281-1
chr4	10932513	10932661	Merged-chr4-10932587-2
chr3	19694079	19694227	Merged-chr3-19694153-2
chr9	3524148	3524296	Merged-chr9-3524222-2
chr7	101302121	101302269	Merged-chr7-101302195-2
chr8	73353388	73353536	Merged-chr8-73353462-2
chr10	25708051	25708199	Merged-chr10-25708125-2
chr2	112379344	112379492	Merged-chr2-112379418-2
chr1	143555542	143555690	Merged-chr1-143555616-1
chr9	83834207	83834355	Merged-chr9-83834281-1
chr15	59082354	59082502	Merged-chr15-59082428-1
chr16	15637877	15638025	Merged-chr16-15637951-2
chr19	4169551	4169699	Merged-chr19-4169625-2
chr7	138084064	138084212	Merged-chr7-138084138-1
chr12	111538295	111538443	Merged-chr12-111538369-1
chr10	80399842	80399990	Merged-chr10-80399916-1
chr12	27065114	27065262	Merged-chr12-27065188-2
chr1	55131109	55131257	Merged-chr1-55131183-1
chr1	166003277	166003425	Merged-chr1-166003351-1
chr3	45375913	45376061	Merged-chr3-45375987-2
chr16	94290388	94290536	Merged-chr16-94290462-1
chr15	34837442	34837590	Merged-chr15-34837516-1
chr11	94211400	94211548	Merged-chr11-94211474-2
chr10	79681748	79681896	Merged-chr10-79681822-2
chr1	47076508	47076656	Merged-chr1-47076582-2
chr1	177441760	177441908	Merged-chr1-177441834-2
chr5	33275014	33275162	Merged-chr5-33275088-2
chr1	190448356	190448504	Merged-chr1-190448430-2
chr3	93506292	93506440	Merged-chr3-93506366-1
chr14	79769771	79769919	Merged-chr14-79769845-2
chr16	82596560	82596708	Merged-chr16-82596634-1
chr10	108162386	108162534	Merged-chr10-108162460-1
chr6	28215460	28215608	Merged-chr6-28215534-2
chr4	32923490	32923638	Merged-chr4-32923564-1
chr7	84689482	84689630	Merged-chr7-84689556-2
chr6	102737316	102737464	Merged-chr6-102737390-2
chr2	23156412	23156560	Merged-chr2-23156486-1
chr3	135438694	135438842	Merged-chr3-135438768-1
chr11	28171385	28171533	Merged-chr11-28171459-2
chr17	23598962	23599110	Merged-chr17-23599036-2
chr1	3670703	3670851	Merged-chr1-3670777-2
chr19	27216854	27217002	Merged-chr19-27216928-2
chr3	41557296	41557444	Merged-chr3-41557370-1
chr3	22156451	22156599	Merged-chr3-22156525-2
chr4	121017070	121017218	Merged-chr4-121017144-1
chr12	40917556	40917704	Merged-chr12-40917630-2
chr1	177258070	177258218	Merged-chr1-177258144-2
chr17	23610644	23610792	Merged-chr17-23610718-2
chr1	178336659	178336807	Merged-chr1-178336733-2
chr7	64287684	64287832	Merged-chr7-64287758-1
chr11	26372073	26372221	Merged-chr11-26372147-2
chr3	14886360	14886508	Merged-chr3-14886434-1
chr17	36271395	36271543	Merged-chr17-36271469-1
chr11	47640828	47640976	Merged-chr11-47640902-2
chr18	31910848	31910996	Merged-chr18-31910922-1
chr18	81252025	81252173	Merged-chr18-81252099-1
chr15	6909848	6909996	Merged-chr15-6909922-2
chr16	18347961	18348109	Merged-chr16-18348035-2
chr11	115187456	115187604	Merged-chr11-115187530-1
chr1	54485033	54485181	Merged-chr1-54485107-2
chr8	16591538	16591686	Merged-chr8-16591612-2
chr6	49367761	49367909	Merged-chr6-49367835-1
chr7	126776867	126777015	Merged-chr7-126776941-2
chr7	58225816	58225964	Merged-chr7-58225890-2
chr10	117376937	117377085	Merged-chr10-117377011-2
chr7	3206551	3206699	Merged-chr7-3206625-1
chr5	102845102	102845250	Merged-chr5-102845176-2
chr4	13300285	13300433	Merged-chr4-13300359-2
chr17	24550068	24550216	Merged-chr17-24550142-2
chr15	81811455	81811603	Merged-chr15-81811529-2
chr17	88440713	88440861	Merged-chr17-88440787-2
chr8	94186676	94186824	Merged-chr8-94186750-1
chr11	13417962	13418110	Merged-chr11-13418036-2
chr5	134099684	134099832	Merged-chr5-134099758-1
chr14	103650417	103650565	Merged-chr14-103650491-2
chr3	9520195	9520343	Merged-chr3-9520269-2
chr9	47530272	47530420	Merged-chr9-47530346-2
chr13	9329425	9329573	Merged-chr13-9329499-2
chr6	93849427	93849575	Merged-chr6-93849501-2
chr12	91589864	91590012	Merged-chr12-91589938-2
chr8	4205406	4205554	Merged-chr8-4205480-2
chr1	189142672	189142820	Merged-chr1-189142746-2
chr11	50174822	50174970	Merged-chr11-50174896-1
chr7	137410559	137410707	Merged-chr7-137410633-1
chr11	67011778	67011926	Merged-chr11-67011852-2
chr6	24348391	24348539	Merged-chr6-24348465-2
chr12	86501958	86502106	Merged-chr12-86502032-2
chr5	27791323	27791471	Merged-chr5-27791397-1
chr17	14818142	14818290	Merged-chr17-14818216-2
chr9	85748988	85749136	Merged-chr9-85749062-2
chr13	3712664	3712812	Merged-chr13-3712738-1
chr1	70725680	70725828	Merged-chr1-70725754-1
chr10	7956570	7956718	Merged-chr10-7956644-2
chr3	122245627	122245775	Merged-chr3-122245701-1
chr7	90460433	90460581	Merged-chr7-90460507-1
chr18	42899385	42899533	Merged-chr18-42899459-2
chr7	63957017	63957165	Merged-chr7-63957091-2
chr7	75914129	75914277	Merged-chr7-75914203-2
chr7	64840176	64840324	Merged-chr7-64840250-1
chr8	75093536	75093684	Merged-chr8-75093610-2
chr16	32608742	32608890	Merged-chr16-32608816-1
chr11	84870418	84870566	Merged-chr11-84870492-1
chr17	42876680	42876828	Merged-chr17-42876754-1
chr3	84040191	84040339	Merged-chr3-84040265-1
chr9	54586263	54586411	Merged-chr9-54586337-2
chr6	122764909	122765057	Merged-chr6-122764983-2
chr16	30064106	30064254	Merged-chr16-30064180-1
chr15	56693079	56693227	Merged-chr15-56693153-1
chr2	32713358	32713506	Merged-chr2-32713432-2
chr2	126302487	126302635	Merged-chr2-126302561-1
chr5	125393215	125393363	Merged-chr5-125393289-2
chr17	12992513	12992661	Merged-chr17-12992587-1
chr1	78657548	78657696	Merged-chr1-78657622-2
chr1	66700685	66700833	Merged-chr1-66700759-1
chr10	24834716	24834864	Merged-chr10-24834790-1
chr12	72070374	72070522	Merged-chr12-72070448-2
chr10	85539937	85540085	Merged-chr10-85540011-1
chr17	47521750	47521898	Merged-chr17-47521824-2
chr17	6827882	6828030	Merged-chr17-6827956-2
chr8	69121482	69121630	Merged-chr8-69121556-2
chr13	32802211	32802359	Merged-chr13-32802285-1
chr2	11503322	11503470	Merged-chr2-11503396-2
chr10	67002744	67002892	Merged-chr10-67002818-1
chr10	4712682	4712830	Merged-chr10-4712756-1
chr15	9094510	9094658	Merged-chr15-9094584-1
chr5	108629659	108629807	Merged-chr5-108629733-2
chr5	118436829	118436977	Merged-chr5-118436903-2
chr7	127708791	127708939	Merged-chr7-127708865-2
chr15	88862403	88862551	Merged-chr15-88862477-2
chr17	55954382	55954530	Merged-chr17-55954456-1
chr6	116107749	116107897	Merged-chr6-116107823-2
chr9	8004498	8004646	Merged-chr9-8004572-2
chr13	38109124	38109272	Merged-chr13-38109198-1
chr8	3395288	3395436	Merged-chr8-3395362-2
chr5	108549896	108550044	Merged-chr5-108549970-1
chr3	33142956	33143104	Merged-chr3-33143030-2
chr16	28753129	28753277	Merged-chr16-28753203-1
chr11	93968210	93968358	Merged-chr11-93968284-2
chr6	126939471	126939619	Merged-chr6-126939545-1
chr17	71475607	71475755	Merged-chr17-71475681-1
chr10	115184903	115185051	Merged-chr10-115184977-1
chr16	85528347	85528495	Merged-chr16-85528421-2
chr9	37054265	37054413	Merged-chr9-37054339-2
chr1	42851019	42851167	Merged-chr1-42851093-1
chr14	54383703	54383851	Merged-chr14-54383777-2
chr19	47731306	47731454	Merged-chr19-47731380-1
chr3	109782370	109782518	Merged-chr3-109782444-2
chr12	65073740	65073888	Merged-chr12-65073814-2
chr3	66973813	66973961	Merged-chr3-66973887-1
chr12	98737612	98737760	Merged-chr12-98737686-2
chr11	11113952	11114100	Merged-chr11-11114026-1
chr1	160363536	160363684	Merged-chr1-160363610-1
chr12	99300087	99300235	Merged-chr12-99300161-2
chr17	23803454	23803602	Merged-chr17-23803528-1
chr14	25318140	25318288	Merged-chr14-25318214-1
chr4	55532646	55532794	Merged-chr4-55532720-2
chr6	122342276	122342424	Merged-chr6-122342350-2
chr15	88819259	88819407	Merged-chr15-88819333-2
chr6	83349361	83349509	Merged-chr6-83349435-1
chr6	143162318	143162466	Merged-chr6-143162392-1
chr9	14642599	14642747	Merged-chr9-14642673-2
chr13	54216111	54216259	Merged-chr13-54216185-2
chr2	106694278	106694426	Merged-chr2-106694352-1
chr1	74854898	74855046	Merged-chr1-74854972-2
chr6	85187421	85187569	Merged-chr6-85187495-2
chr3	22297967	22298115	Merged-chr3-22298041-2
chr6	67170354	67170502	Merged-chr6-67170428-2
chr13	112987531	112987679	Merged-chr13-112987605-1
chr9	108567169	108567317	Merged-chr9-108567243-2
chr5	30907836	30907984	Merged-chr5-30907910-1
chr11	20145499	20145647	Merged-chr11-20145573-2
chr8	91133677	91133825	Merged-chr8-91133751-2
chr4	116720921	116721069	Merged-chr4-116720995-2
chr19	53142242	53142390	Merged-chr19-53142316-1
chr9	101034427	101034575	Merged-chr9-101034501-2
chr17	65370166	65370314	Merged-chr17-65370240-1
chr15	44787699	44787847	Merged-chr15-44787773-2
chrX	20356287	20356435	Merged-chrX-20356361-2
chr17	79355710	79355858	Merged-chr17-79355784-1
chr18	45559767	45559915	Merged-chr18-45559841-1
chrX	36817231	36817379	Merged-chrX-36817305-1
chr8	13786070	13786218	Merged-chr8-13786144-1
chr15	97784307	97784455	Merged-chr15-97784381-2
chr16	3884407	3884555	Merged-chr16-3884481-2
chr8	122460638	122460786	Merged-chr8-122460712-2
chr5	135001382	135001530	Merged-chr5-135001456-2
chr10	25314239	25314387	Merged-chr10-25314313-2
chr19	28680142	28680290	Merged-chr19-28680216-2
chr16	44139787	44139935	Merged-chr16-44139861-2
chr2	26902946	26903094	Merged-chr2-26903020-2
chr4	141790681	141790829	Merged-chr4-141790755-1
chr17	70900840	70900988	Merged-chr17-70900914-1
chr7	139364148	139364296	Merged-chr7-139364222-1
chr17	24351934	24352082	Merged-chr17-24352008-2
chr10	9901133	9901281	Merged-chr10-9901207-2
chr12	84625268	84625416	Merged-chr12-84625342-2
chr18	33950608	33950756	Merged-chr18-33950682-2
chr14	45658023	45658171	Merged-chr14-45658097-2
chr10	26695292	26695440	Merged-chr10-26695366-1
chr1	9545636	9545784	Merged-chr1-9545710-2
chr15	102399593	102399741	Merged-chr15-102399667-2
chr5	31240862	31241010	Merged-chr5-31240936-1
chr15	102203461	102203609	Merged-chr15-102203535-1
chr2	57238051	57238199	Merged-chr2-57238125-2
chr8	13159184	13159332	Merged-chr8-13159258-2
chr10	128035452	128035600	Merged-chr10-128035526-2
chr15	81831610	81831758	Merged-chr15-81831684-2
chr15	7226407	7226555	Merged-chr15-7226481-2
chr2	170131090	170131238	Merged-chr2-170131164-2
chr2	91183250	91183398	Merged-chr2-91183324-2
chr9	25401026	25401174	Merged-chr9-25401100-1
chr9	70817427	70817575	Merged-chr9-70817501-1
chr19	55099364	55099512	Merged-chr19-55099438-2
chr2	20665716	20665864	Merged-chr2-20665790-2
chr11	20231193	20231341	Merged-chr11-20231267-2
chr19	21778090	21778238	Merged-chr19-21778164-2
chr2	92144034	92144182	Merged-chr2-92144108-2
chr12	80228055	80228203	Merged-chr12-80228129-1
chr8	107425037	107425185	Merged-chr8-107425111-1
chr3	101163531	101163679	Merged-chr3-101163605-2
chr18	46525718	46525866	Merged-chr18-46525792-2
chr17	87282815	87282963	Merged-chr17-87282889-2
chr7	110061931	110062079	Merged-chr7-110062005-1
chr6	39872014	39872162	Merged-chr6-39872088-1
chr5	98167229	98167377	Merged-chr5-98167303-1
chr7	122478221	122478369	Merged-chr7-122478295-1
chr10	81037151	81037299	Merged-chr10-81037225-2
chr13	12889726	12889874	Merged-chr13-12889800-1
chr2	128818253	128818401	Merged-chr2-128818327-1
chr17	47511357	47511505	Merged-chr17-47511431-2
chr17	28224094	28224242	Merged-chr17-28224168-2
chr10	120171569	120171717	Merged-chr10-120171643-1
chr7	112743833	112743981	Merged-chr7-112743907-1
chr4	45514091	45514239	Merged-chr4-45514165-2
chr11	28583259	28583407	Merged-chr11-28583333-2
chr9	110732764	110732912	Merged-chr9-110732838-2
chr12	8499945	8500093	Merged-chr12-8500019-1
chr14	73385144	73385292	Merged-chr14-73385218-1
chr11	5741284	5741432	Merged-chr11-5741358-2
chr11	88993894	88994042	Merged-chr11-88993968-2
chr13	34345199	34345347	Merged-chr13-34345273-2
chr12	59040412	59040560	Merged-chr12-59040486-1
chr15	51877614	51877762	Merged-chr15-51877688-1
chr2	70661286	70661434	Merged-chr2-70661360-1
chr9	108048996	108049144	Merged-chr9-108049070-1
chr5	149636339	149636487	Merged-chr5-149636413-2
chrX	153119077	153119225	Merged-chrX-153119151-2
chr16	63213642	63213790	Merged-chr16-63213716-1
chr18	74065032	74065180	Merged-chr18-74065106-1
chr19	59585888	59586036	Merged-chr19-59585962-2
chr6	94647600	94647748	Merged-chr6-94647674-2
chr11	63533634	63533782	Merged-chr11-63533708-2
chr4	124802501	124802649	Merged-chr4-124802575-2
chr14	121506379	121506527	Merged-chr14-121506453-2
chr2	121806770	121806918	Merged-chr2-121806844-1
chr15	52967889	52968037	Merged-chr15-52967963-2
chr5	23386978	23387126	Merged-chr5-23387052-2
chr16	17220263	17220411	Merged-chr16-17220337-2
chr6	125215543	125215691	Merged-chr6-125215617-2
chr7	127935514	127935662	Merged-chr7-127935588-2
chr13	51846562	51846710	Merged-chr13-51846636-2
chr13	67683595	67683743	Merged-chr13-67683669-2
chr11	43653173	43653321	Merged-chr11-43653247-1
chr8	123332668	123332816	Merged-chr8-123332742-2
chr2	131186879	131187027	Merged-chr2-131186953-2
chrX	43430764	43430912	Merged-chrX-43430838-2
chr15	80977763	80977911	Merged-chr15-80977837-1
chr2	128211975	128212123	Merged-chr2-128212049-2
chr3	108401890	108402038	Merged-chr3-108401964-2
chr8	71382051	71382199	Merged-chr8-71382125-2
chr10	13641881	13642029	Merged-chr10-13641955-2
chr11	83964392	83964540	Merged-chr11-83964466-2
chr10	21102081	21102229	Merged-chr10-21102155-2
chr2	38688942	38689090	Merged-chr2-38689016-2
chr10	36507186	36507334	Merged-chr10-36507260-1
chr16	30641663	30641811	Merged-chr16-30641737-1
chr10	110856118	110856266	Merged-chr10-110856192-2
chr2	42740603	42740751	Merged-chr2-42740677-1
chr6	136471013	136471161	Merged-chr6-136471087-2
chr12	76072038	76072186	Merged-chr12-76072112-2
chr4	129113226	129113374	Merged-chr4-129113300-2
chr7	27331163	27331311	Merged-chr7-27331237-2
chr11	19829756	19829904	Merged-chr11-19829830-2
chr15	36792776	36792924	Merged-chr15-36792850-2
chr6	147091655	147091803	Merged-chr6-147091729-2
chr11	53769801	53769949	Merged-chr11-53769875-2
chr15	103215305	103215453	Merged-chr15-103215379-2
chr5	136102277	136102425	Merged-chr5-136102351-2
chr11	22610464	22610612	Merged-chr11-22610538-2
chr6	97048582	97048730	Merged-chr6-97048656-2
chr8	36094721	36094869	Merged-chr8-36094795-2
chr5	18799622	18799770	Merged-chr5-18799696-2
chr9	115545874	115546022	Merged-chr9-115545948-1
chr2	167537956	167538104	Merged-chr2-167538030-2
chrX	135008770	135008918	Merged-chrX-135008844-2
chr2	105263336	105263484	Merged-chr2-105263410-2
chr12	86498857	86499005	Merged-chr12-86498931-1
chr14	61648786	61648934	Merged-chr14-61648860-1
chr6	8209472	8209620	Merged-chr6-8209546-2
chr8	122523492	122523640	Merged-chr8-122523566-2
chr6	115037817	115037965	Merged-chr6-115037891-2
chr8	41374505	41374653	Merged-chr8-41374579-2
chr13	93499623	93499771	Merged-chr13-93499697-1
chr11	116853724	116853872	Merged-chr11-116853798-1
chr1	86509546	86509694	Merged-chr1-86509620-2
chr3	35723726	35723874	Merged-chr3-35723800-2
chr16	16911976	16912124	Merged-chr16-16912050-2
chr8	108715296	108715444	Merged-chr8-108715370-2
chr7	45162239	45162387	Merged-chr7-45162313-2
chr5	38656424	38656572	Merged-chr5-38656498-2
chr6	125592169	125592317	Merged-chr6-125592243-2
chr10	128498687	128498835	Merged-chr10-128498761-1
chr6	85451170	85451318	Merged-chr6-85451244-2
chr4	75300744	75300892	Merged-chr4-75300818-2
chr1	190168957	190169105	Merged-chr1-190169031-2
chr9	102690187	102690335	Merged-chr9-102690261-2
chr8	18950732	18950880	Merged-chr8-18950806-2
chr2	126552917	126553065	Merged-chr2-126552991-2
chr19	40271432	40271580	Merged-chr19-40271506-2
chr6	86849439	86849587	Merged-chr6-86849513-1
chr19	41013696	41013844	Merged-chr19-41013770-1
chr2	144369119	144369267	Merged-chr2-144369193-2
chr6	120666125	120666273	Merged-chr6-120666199-1
chr10	14967750	14967898	Merged-chr10-14967824-2
chr5	119055616	119055764	Merged-chr5-119055690-2
chr1	194620511	194620659	Merged-chr1-194620585-2
chr7	6770277	6770425	Merged-chr7-6770351-2
chr7	38061133	38061281	Merged-chr7-38061207-2
chr18	5163415	5163563	Merged-chr18-5163489-2
chr6	72794942	72795090	Merged-chr6-72795016-2
chr8	81341637	81341785	Merged-chr8-81341711-1
chr4	130519954	130520102	Merged-chr4-130520028-2
chr13	109260234	109260382	Merged-chr13-109260308-2
chr9	112207925	112208073	Merged-chr9-112207999-2
chr12	100201953	100202101	Merged-chr12-100202027-2
chr3	146404406	146404554	Merged-chr3-146404480-2
chr17	65872818	65872966	Merged-chr17-65872892-2
chr8	61550096	61550244	Merged-chr8-61550170-2
chr7	122289068	122289216	Merged-chr7-122289142-2
chr7	58224842	58224990	Merged-chr7-58224916-2
chr6	99009933	99010081	Merged-chr6-99010007-2
chr8	31149825	31149973	Merged-chr8-31149899-1
chr11	20772847	20772995	Merged-chr11-20772921-2
chr4	43957522	43957670	Merged-chr4-43957596-2
chr15	31294453	31294601	Merged-chr15-31294527-2
chr18	35022520	35022668	Merged-chr18-35022594-2
chr12	105322342	105322490	Merged-chr12-105322416-1
chr11	58938876	58939024	Merged-chr11-58938950-1
chr5	120588591	120588739	Merged-chr5-120588665-1
chr14	67716337	67716485	Merged-chr14-67716411-2
chr6	134928585	134928733	Merged-chr6-134928659-1
chr11	65162351	65162499	Merged-chr11-65162425-1
chr2	114177945	114178093	Merged-chr2-114178019-1
chr17	29093736	29093884	Merged-chr17-29093810-1
chr8	69176433	69176581	Merged-chr8-69176507-2
chr3	31094344	31094492	Merged-chr3-31094418-2
chr2	116979895	116980043	Merged-chr2-116979969-2
chr1	12814490	12814638	Merged-chr1-12814564-2
chr8	84192120	84192268	Merged-chr8-84192194-2
chr5	12847286	12847434	Merged-chr5-12847360-2
chr5	125532384	125532532	Merged-chr5-125532458-1
chr1	72244126	72244274	Merged-chr1-72244200-1
chr1	72960249	72960397	Merged-chr1-72960323-2
chr14	24253989	24254137	Merged-chr14-24254063-2
chr7	49527600	49527748	Merged-chr7-49527674-2
chr11	68691338	68691486	Merged-chr11-68691412-2
chr18	54576787	54576935	Merged-chr18-54576861-2
chr10	88708904	88709052	Merged-chr10-88708978-1
chr5	105700680	105700828	Merged-chr5-105700754-1
chr7	140676401	140676549	Merged-chr7-140676475-2
chr9	90162984	90163132	Merged-chr9-90163058-1
chr11	63926972	63927120	Merged-chr11-63927046-2
chr19	42795393	42795541	Merged-chr19-42795467-1
chr7	6999037	6999185	Merged-chr7-6999111-2
chr2	154428022	154428170	Merged-chr2-154428096-2
chr17	71598733	71598881	Merged-chr17-71598807-1
chr9	75232177	75232325	Merged-chr9-75232251-1
chr6	147145413	147145561	Merged-chr6-147145487-2
chr7	49778205	49778353	Merged-chr7-49778279-2
chr16	92058181	92058329	Merged-chr16-92058255-2
chr15	78436936	78437084	Merged-chr15-78437010-2
chr7	29162836	29162984	Merged-chr7-29162910-2
chr6	125504748	125504896	Merged-chr6-125504822-2
chr16	16358610	16358758	Merged-chr16-16358684-1
chr18	44643967	44644115	Merged-chr18-44644041-1
chr7	108197045	108197193	Merged-chr7-108197119-2
chr17	56762169	56762317	Merged-chr17-56762243-1
chr2	152804447	152804595	Merged-chr2-152804521-2
chr1	93305884	93306032	Merged-chr1-93305958-1
chr1	63110669	63110817	Merged-chr1-63110743-2
chr12	25475554	25475702	Merged-chr12-25475628-2
chr18	38601596	38601744	Merged-chr18-38601670-2
chr7	49071271	49071419	Merged-chr7-49071345-2
chr5	149229014	149229162	Merged-chr5-149229088-1
chr19	29325284	29325432	Merged-chr19-29325358-2
chr7	145139179	145139327	Merged-chr7-145139253-2
chr2	112455404	112455552	Merged-chr2-112455478-1
chr15	72689916	72690064	Merged-chr15-72689990-1
chr5	23418451	23418599	Merged-chr5-23418525-2
chr2	155729304	155729452	Merged-chr2-155729378-2
chr13	23555038	23555186	Merged-chr13-23555112-1
chr5	81519493	81519641	Merged-chr5-81519567-2
chr10	128525766	128525914	Merged-chr10-128525840-2
chr6	5325103	5325251	Merged-chr6-5325177-2
chr15	96333529	96333677	Merged-chr15-96333603-2
chr2	20654855	20655003	Merged-chr2-20654929-1
chr2	172516560	172516708	Merged-chr2-172516634-1
chr16	97322743	97322891	Merged-chr16-97322817-1
chr3	108856930	108857078	Merged-chr3-108857004-2
chr10	86972143	86972291	Merged-chr10-86972217-2
chr6	41605057	41605205	Merged-chr6-41605131-1
chr2	128265547	128265695	Merged-chr2-128265621-2
chr1	192455138	192455286	Merged-chr1-192455212-2
chr3	9159201	9159349	Merged-chr3-9159275-2
chr7	78910785	78910933	Merged-chr7-78910859-2
chr9	121371493	121371641	Merged-chr9-121371567-2
chr9	49798955	49799103	Merged-chr9-49799029-2
chr14	45507191	45507339	Merged-chr14-45507265-1
chr14	78288926	78289074	Merged-chr14-78289000-2
chr9	57836693	57836841	Merged-chr9-57836767-2
chr2	152739464	152739612	Merged-chr2-152739538-2
chr15	41789289	41789437	Merged-chr15-41789363-2
chr16	95093862	95094010	Merged-chr16-95093936-1
chr16	16213451	16213599	Merged-chr16-16213525-2
chr4	117373672	117373820	Merged-chr4-117373746-1
chr19	11299696	11299844	Merged-chr19-11299770-2
chr18	9865820	9865968	Merged-chr18-9865894-1
chr1	74111439	74111587	Merged-chr1-74111513-2
chr2	38658633	38658781	Merged-chr2-38658707-1
chr10	110744926	110745074	Merged-chr10-110745000-2
chr3	57847288	57847436	Merged-chr3-57847362-1
chr4	62262392	62262540	Merged-chr4-62262466-2
chr12	19175859	19176007	Merged-chr12-19175933-1
chr3	75651740	75651888	Merged-chr3-75651814-1
chr17	57273996	57274144	Merged-chr17-57274070-1
chr11	87074004	87074152	Merged-chr11-87074078-1
chr1	53750077	53750225	Merged-chr1-53750151-1
chr4	33198242	33198390	Merged-chr4-33198316-2
chr12	12788720	12788868	Merged-chr12-12788794-2
chr8	8690413	8690561	Merged-chr8-8690487-2
chr15	12848320	12848468	Merged-chr15-12848394-2
chr1	146426934	146427082	Merged-chr1-146427008-2
chr6	94755537	94755685	Merged-chr6-94755611-2
chr2	154426692	154426840	Merged-chr2-154426766-2
chr18	65965198	65965346	Merged-chr18-65965272-1
chr13	93771782	93771930	Merged-chr13-93771856-2
chr12	39742261	39742409	Merged-chr12-39742335-1
chr11	74723880	74724028	Merged-chr11-74723954-2
chr4	12171367	12171515	Merged-chr4-12171441-1
chr1	161251020	161251168	Merged-chr1-161251094-1
chr7	113774173	113774321	Merged-chr7-113774247-1
chr11	3932041	3932189	Merged-chr11-3932115-2
chr8	54076303	54076451	Merged-chr8-54076377-2
chr14	47572885	47573033	Merged-chr14-47572959-1
chr12	76710147	76710295	Merged-chr12-76710221-1
chr10	79754973	79755121	Merged-chr10-79755047-2
chr15	8569314	8569462	Merged-chr15-8569388-1
chr14	123660196	123660344	Merged-chr14-123660270-1
chr6	83441561	83441709	Merged-chr6-83441635-1
chr19	55714728	55714876	Merged-chr19-55714802-1
chr10	36611427	36611575	Merged-chr10-36611501-2
chr6	119417585	119417733	Merged-chr6-119417659-1
chr14	13770838	13770986	Merged-chr14-13770912-2
chr2	119300080	119300228	Merged-chr2-119300154-1
chr3	122419825	122419973	Merged-chr3-122419899-1
chr13	87452561	87452709	Merged-chr13-87452635-2
chr18	70599816	70599964	Merged-chr18-70599890-2
chr18	35098762	35098910	Merged-chr18-35098836-2
chr13	86345399	86345547	Merged-chr13-86345473-2
chr19	43441203	43441351	Merged-chr19-43441277-2
chr17	74994019	74994167	Merged-chr17-74994093-1
chr9	121314221	121314369	Merged-chr9-121314295-1
chr4	155173554	155173702	Merged-chr4-155173628-2
chr3	69598878	69599026	Merged-chr3-69598952-2
chr4	131873352	131873500	Merged-chr4-131873426-1
chr8	80738422	80738570	Merged-chr8-80738496-1
chr9	105309668	105309816	Merged-chr9-105309742-1
chr7	38227759	38227907	Merged-chr7-38227833-1
chr2	78189678	78189826	Merged-chr2-78189752-2
chr4	133039239	133039387	Merged-chr4-133039313-2
chr17	33718585	33718733	Merged-chr17-33718659-1
chr5	76184381	76184529	Merged-chr5-76184455-2
chr17	24251235	24251383	Merged-chr17-24251309-1
chr3	108940310	108940458	Merged-chr3-108940384-2
chr11	84869991	84870139	Merged-chr11-84870065-1
chr4	108780666	108780814	Merged-chr4-108780740-2
chr15	99875333	99875481	Merged-chr15-99875407-2
chr12	86801209	86801357	Merged-chr12-86801283-1
chr14	103354697	103354845	Merged-chr14-103354771-1
chr3	11212396	11212544	Merged-chr3-11212470-1
chr2	181188877	181189025	Merged-chr2-181188951-1
chr7	80746490	80746638	Merged-chr7-80746564-1
chr9	96889376	96889524	Merged-chr9-96889450-1
chr11	64089821	64089969	Merged-chr11-64089895-2
chr2	157058748	157058896	Merged-chr2-157058822-2
chr10	47466058	47466206	Merged-chr10-47466132-2
chr6	142511612	142511760	Merged-chr6-142511686-2
chr2	132946047	132946195	Merged-chr2-132946121-2
chr2	152726884	152727032	Merged-chr2-152726958-2
chr7	130252219	130252367	Merged-chr7-130252293-2
chr1	36244216	36244364	Merged-chr1-36244290-2
chr8	89003464	89003612	Merged-chr8-89003538-2
chr7	37467018	37467166	Merged-chr7-37467092-2
chr1	136707359	136707507	Merged-chr1-136707433-2
chr2	24405746	24405894	Merged-chr2-24405820-1
chr10	111433620	111433768	Merged-chr10-111433694-1
chr4	40723098	40723246	Merged-chr4-40723172-2
chr2	146838642	146838790	Merged-chr2-146838716-2
chr12	82616764	82616912	Merged-chr12-82616838-2
chr2	25428480	25428628	Merged-chr2-25428554-1
chr3	96278047	96278195	Merged-chr3-96278121-1
chr6	33126676	33126824	Merged-chr6-33126750-1
chr9	22052004	22052152	Merged-chr9-22052078-1
chr1	172027213	172027361	Merged-chr1-172027287-2
chr10	128891311	128891459	Merged-chr10-128891385-2
chr10	67549306	67549454	Merged-chr10-67549380-1
chr12	109542896	109543044	Merged-chr12-109542970-2
chr8	122523161	122523309	Merged-chr8-122523235-2
chr18	73225007	73225155	Merged-chr18-73225081-2
chr9	21337764	21337912	Merged-chr9-21337838-1
chr5	113942771	113942919	Merged-chr5-113942845-2
chr7	28338643	28338791	Merged-chr7-28338717-2
chr8	70698361	70698509	Merged-chr8-70698435-2
chr8	119515779	119515927	Merged-chr8-119515853-2
chr11	71389667	71389815	Merged-chr11-71389741-1
chr6	85374573	85374721	Merged-chr6-85374647-1
chr9	76565767	76565915	Merged-chr9-76565841-2
chr6	60363842	60363990	Merged-chr6-60363916-2
chr19	25610502	25610650	Merged-chr19-25610576-2
chr8	117314670	117314818	Merged-chr8-117314744-2
chr13	64152342	64152490	Merged-chr13-64152416-2
chr13	63980055	63980203	Merged-chr13-63980129-2
chr10	3941075	3941223	Merged-chr10-3941149-2
chr13	31822876	31823024	Merged-chr13-31822950-2
chr9	65109515	65109663	Merged-chr9-65109589-2
chr4	125651928	125652076	Merged-chr4-125652002-2
chr11	9983066	9983214	Merged-chr11-9983140-2
chr14	28958734	28958882	Merged-chr14-28958808-1
chr13	35741597	35741745	Merged-chr13-35741671-2
chr14	122267698	122267846	Merged-chr14-122267772-2
chr9	66514225	66514373	Merged-chr9-66514299-1
chr2	93334426	93334574	Merged-chr2-93334500-1
chr16	36887626	36887774	Merged-chr16-36887700-1
chr3	90224470	90224618	Merged-chr3-90224544-1
chr2	143546865	143547013	Merged-chr2-143546939-1
chr6	38730582	38730730	Merged-chr6-38730656-2
chr1	166154252	166154400	Merged-chr1-166154326-1
chr1	4802656	4802804	Merged-chr1-4802730-2
chr2	84837224	84837372	Merged-chr2-84837298-2
chr17	24632534	24632682	Merged-chr17-24632608-2
chr9	107612736	107612884	Merged-chr9-107612810-1
chr19	7268129	7268277	Merged-chr19-7268203-2
chr10	121476157	121476305	Merged-chr10-121476231-1
chr2	92012904	92013052	Merged-chr2-92012978-2
chr8	31128433	31128581	Merged-chr8-31128507-2
chr10	95719553	95719701	Merged-chr10-95719627-2
chr19	32712685	32712833	Merged-chr19-32712759-1
chr13	102896114	102896262	Merged-chr13-102896188-1
chr2	102110349	102110497	Merged-chr2-102110423-2
chr2	31572421	31572569	Merged-chr2-31572495-1
chr15	97992937	97993085	Merged-chr15-97993011-1
chr11	120065407	120065555	Merged-chr11-120065481-2
chr17	15380634	15380782	Merged-chr17-15380708-2
chr3	86223603	86223751	Merged-chr3-86223677-2
chr4	140406352	140406500	Merged-chr4-140406426-1
chr2	126552431	126552579	Merged-chr2-126552505-2
chr2	52072061	52072209	Merged-chr2-52072135-1
chr15	73466739	73466887	Merged-chr15-73466813-2
chr2	25319010	25319158	Merged-chr2-25319084-2
chr1	167290005	167290153	Merged-chr1-167290079-2
chr9	51815804	51815952	Merged-chr9-51815878-2
chr2	104122508	104122656	Merged-chr2-104122582-2
chr12	33176082	33176230	Merged-chr12-33176156-2
chr2	168791147	168791295	Merged-chr2-168791221-1
chr10	110854786	110854934	Merged-chr10-110854860-2
chr13	40258856	40259004	Merged-chr13-40258930-2
chr7	128080100	128080248	Merged-chr7-128080174-2
chr18	67610745	67610893	Merged-chr18-67610819-2
chr5	140332182	140332330	Merged-chr5-140332256-1
chr1	182019840	182019988	Merged-chr1-182019914-2
chr10	58540728	58540876	Merged-chr10-58540802-2
chr10	85539516	85539664	Merged-chr10-85539590-2
chr7	118992577	118992725	Merged-chr7-118992651-2
chr7	16944487	16944635	Merged-chr7-16944561-2
chr18	82477397	82477545	Merged-chr18-82477471-2
chr9	57163329	57163477	Merged-chr9-57163403-1
chr3	137867268	137867416	Merged-chr3-137867342-1
chr6	116671066	116671214	Merged-chr6-116671140-2
chr7	80833144	80833292	Merged-chr7-80833218-2
chr5	37163288	37163436	Merged-chr5-37163362-2
chr17	73487961	73488109	Merged-chr17-73488035-2
chr11	115564381	115564529	Merged-chr11-115564455-2
chrX	107858286	107858434	Merged-chrX-107858360-2
chr2	115581242	115581390	Merged-chr2-115581316-2
chr8	105259738	105259886	Merged-chr8-105259812-2
chr9	53536557	53536705	Merged-chr9-53536631-1
chr16	11176258	11176406	Merged-chr16-11176332-2
chr8	19784813	19784961	Merged-chr8-19784887-1
chr9	61293245	61293393	Merged-chr9-61293319-2
chr16	20611451	20611599	Merged-chr16-20611525-2
chr12	72688398	72688546	Merged-chr12-72688472-2
chr8	123515365	123515513	Merged-chr8-123515439-2
chr19	47019451	47019599	Merged-chr19-47019525-2
chr9	110408081	110408229	Merged-chr9-110408155-2
chr7	81213046	81213194	Merged-chr7-81213120-1
chr7	35382952	35383100	Merged-chr7-35383026-2
chr5	117413562	117413710	Merged-chr5-117413636-2
chrX	95253668	95253816	Merged-chrX-95253742-2
chr1	180933792	180933940	Merged-chr1-180933866-2
chr14	118436895	118437043	Merged-chr14-118436969-2
chr10	128149608	128149756	Merged-chr10-128149682-2
chr12	86466311	86466459	Merged-chr12-86466385-2
chr11	106788382	106788530	Merged-chr11-106788456-1
chr7	3331986	3332134	Merged-chr7-3332060-1
chr4	91376339	91376487	Merged-chr4-91376413-2
chr17	17739988	17740136	Merged-chr17-17740062-2
chr18	70411116	70411264	Merged-chr18-70411190-1
chr1	105780545	105780693	Merged-chr1-105780619-2
chr4	129222629	129222777	Merged-chr4-129222703-2
chr15	38384399	38384547	Merged-chr15-38384473-2
chr10	108353059	108353207	Merged-chr10-108353133-1
chr3	138438751	138438899	Merged-chr3-138438825-1
chr14	20702919	20703067	Merged-chr14-20702993-1
chr3	88553526	88553674	Merged-chr3-88553600-1
chr1	167289626	167289774	Merged-chr1-167289700-1
chr8	79031007	79031155	Merged-chr8-79031081-2
chr11	120643699	120643847	Merged-chr11-120643773-1
chr6	87937471	87937619	Merged-chr6-87937545-2
chr10	33196035	33196183	Merged-chr10-33196109-2
chr3	35028037	35028185	Merged-chr3-35028111-2
chr16	9280980	9281128	Merged-chr16-9281054-2
chr15	73707332	73707480	Merged-chr15-73707406-2
chr2	133596657	133596805	Merged-chr2-133596731-2
chr16	14557280	14557428	Merged-chr16-14557354-1
chr7	133708778	133708926	Merged-chr7-133708852-1
chr1	20554492	20554640	Merged-chr1-20554566-1
chr5	72444071	72444219	Merged-chr5-72444145-2
chr19	23162503	23162651	Merged-chr19-23162577-1
chr9	98726657	98726805	Merged-chr9-98726731-1
chr1	88205580	88205728	Merged-chr1-88205654-2
chr7	4526365	4526513	Merged-chr7-4526439-2
chr1	72255148	72255296	Merged-chr1-72255222-1
chr9	22137195	22137343	Merged-chr9-22137269-2
chr13	66311939	66312087	Merged-chr13-66312013-2
chr10	99132305	99132453	Merged-chr10-99132379-2
chr9	123461919	123462067	Merged-chr9-123461993-1
chr7	6760153	6760301	Merged-chr7-6760227-2
chr5	140583978	140584126	Merged-chr5-140584052-2
chr5	28955142	28955290	Merged-chr5-28955216-1

## Sheet: ASCL2_closed
Chr	St	End	PeakID
chr13	55600108	55600256	Merged-chr13-55600182-1
chr2	19716063	19716211	Merged-chr2-19716137-2
chr11	58009363	58009511	Merged-chr11-58009437-2
chr9	108936954	108937102	Merged-chr9-108937028-1
chr15	99420626	99420774	Merged-chr15-99420700-2
chr9	45269215	45269363	Merged-chr9-45269289-2
chr2	167423287	167423435	Merged-chr2-167423361-1
chr17	47739825	47739973	Merged-chr17-47739899-2
chr11	5182067	5182215	Merged-chr11-5182141-2
chr1	190168443	190168591	Merged-chr1-190168517-2
chr15	101553362	101553510	Merged-chr15-101553436-2
chr7	97341110	97341258	Merged-chr7-97341184-2
chr1	134555509	134555657	Merged-chr1-134555583-2
chr16	17208885	17209033	Merged-chr16-17208959-2
chr2	38992078	38992226	Merged-chr2-38992152-1
chr4	125119257	125119405	Merged-chr4-125119331-2
chr4	13324890	13325038	Merged-chr4-13324964-2
chr8	20011264	20011412	Merged-chr8-20011338-1
chr12	86167287	86167435	Merged-chr12-86167361-2
chr15	76617637	76617785	Merged-chr15-76617711-1
chr7	130713512	130713660	Merged-chr7-130713586-2
chr9	46334615	46334763	Merged-chr9-46334689-1
chr15	38282443	38282591	Merged-chr15-38282517-2
chr3	51326842	51326990	Merged-chr3-51326916-1
chr9	61366314	61366462	Merged-chr9-61366388-2
chr17	46254267	46254415	Merged-chr17-46254341-2
chr5	108433970	108434118	Merged-chr5-108434044-1
chr17	23968942	23969090	Merged-chr17-23969016-2
chr12	86498472	86498620	Merged-chr12-86498546-2
chr1	84694888	84695036	Merged-chr1-84694962-2
chr17	46857149	46857297	Merged-chr17-46857223-2
chr11	99026154	99026302	Merged-chr11-99026228-2
chr4	107366532	107366680	Merged-chr4-107366606-2
chr6	91843135	91843283	Merged-chr6-91843209-1
chr7	25214257	25214405	Merged-chr7-25214331-1
chr3	58871942	58872090	Merged-chr3-58872016-2
chr1	132736474	132736622	Merged-chr1-132736548-2
chr1	190161447	190161595	Merged-chr1-190161521-2
chr5	53110229	53110377	Merged-chr5-53110303-2
chr17	75463468	75463616	Merged-chr17-75463542-2
chr6	100438711	100438859	Merged-chr6-100438785-1
chr8	115414212	115414360	Merged-chr8-115414286-1
chr9	118875852	118876000	Merged-chr9-118875926-1
chr2	34480331	34480479	Merged-chr2-34480405-2
chr12	28972112	28972260	Merged-chr12-28972186-2
chr1	74601212	74601360	Merged-chr1-74601286-2
chr17	36788878	36789026	Merged-chr17-36788952-1
chr17	56194871	56195019	Merged-chr17-56194945-1
chr18	61698003	61698151	Merged-chr18-61698077-1
chr10	79921103	79921251	Merged-chr10-79921177-1
chr8	83698577	83698725	Merged-chr8-83698651-1
chr19	57198252	57198400	Merged-chr19-57198326-2
chr5	123315328	123315476	Merged-chr5-123315402-1
chr2	152000011	152000159	Merged-chr2-152000085-2
chr2	178603490	178603638	Merged-chr2-178603564-2
chr11	102206600	102206748	Merged-chr11-102206674-1
chr19	38060220	38060368	Merged-chr19-38060294-2
chr10	81341689	81341837	Merged-chr10-81341763-2
chr15	79619869	79620017	Merged-chr15-79619943-2
chr5	100038299	100038447	Merged-chr5-100038373-2
chr11	49588724	49588872	Merged-chr11-49588798-2
chr8	109458588	109458736	Merged-chr8-109458662-2
chr10	120978534	120978682	Merged-chr10-120978608-2
chr4	49837975	49838123	Merged-chr4-49838049-2
chr2	165563459	165563607	Merged-chr2-165563533-2
chr1	170655649	170655797	Merged-chr1-170655723-2
chr1	127819851	127819999	Merged-chr1-127819925-2
chr17	29081360	29081508	Merged-chr17-29081434-2
chr4	137771373	137771521	Merged-chr4-137771447-2
chr4	116995877	116996025	Merged-chr4-116995951-2
chr4	136104997	136105145	Merged-chr4-136105071-2
chr6	115717324	115717472	Merged-chr6-115717398-2
chr2	165239631	165239779	Merged-chr2-165239705-1
chr11	96786193	96786341	Merged-chr11-96786267-2
chr2	28839829	28839977	Merged-chr2-28839903-2
chr8	120383960	120384108	Merged-chr8-120384034-2
chr16	33584911	33585059	Merged-chr16-33584985-2
chr10	81366382	81366530	Merged-chr10-81366456-2
chr3	88144119	88144267	Merged-chr3-88144193-2
chr11	4146465	4146613	Merged-chr11-4146539-2
chr4	139089410	139089558	Merged-chr4-139089484-2
chr15	96604419	96604567	Merged-chr15-96604493-2
chr14	114959788	114959936	Merged-chr14-114959862-2
chr10	81242126	81242274	Merged-chr10-81242200-1
chr4	84222947	84223095	Merged-chr4-84223021-2
chr17	7906725	7906873	Merged-chr17-7906799-2
chr6	34515585	34515733	Merged-chr6-34515659-2
chr12	73242089	73242237	Merged-chr12-73242163-2
chr8	119586171	119586319	Merged-chr8-119586245-2
chr6	117765898	117766046	Merged-chr6-117765972-2
chr17	31790925	31791073	Merged-chr17-31790999-1
chr9	41333275	41333423	Merged-chr9-41333349-2
chr4	155135951	155136099	Merged-chr4-155136025-1
chr5	91537740	91537888	Merged-chr5-91537814-1
chr13	49188749	49188897	Merged-chr13-49188823-1
chr11	99948808	99948956	Merged-chr11-99948882-2
chr11	49728034	49728182	Merged-chr11-49728108-2
chr9	115537283	115537431	Merged-chr9-115537357-2
chr4	139614970	139615118	Merged-chr4-139615044-2
chr4	151325641	151325789	Merged-chr4-151325715-2
chr11	99658642	99658790	Merged-chr11-99658716-2
chr11	71513041	71513189	Merged-chr11-71513115-2
chr5	118815877	118816025	Merged-chr5-118815951-2
chr2	166887943	166888091	Merged-chr2-166888017-2
chr10	81417045	81417193	Merged-chr10-81417119-2
chr15	75981326	75981474	Merged-chr15-75981400-2
chr18	68235135	68235283	Merged-chr18-68235209-2
chr16	31510188	31510336	Merged-chr16-31510262-1
chr2	158631556	158631704	Merged-chr2-158631630-2
chr8	72375227	72375375	Merged-chr8-72375301-2
chr10	41404346	41404494	Merged-chr10-41404420-2
chr3	94960442	94960590	Merged-chr3-94960516-2
chr2	31870778	31870926	Merged-chr2-31870852-2
chr11	100257455	100257603	Merged-chr11-100257529-1
chr6	121481820	121481968	Merged-chr6-121481894-2
chr2	93035789	93035937	Merged-chr2-93035863-2
chr1	35995917	35996065	Merged-chr1-35995991-2
chr9	106212673	106212821	Merged-chr9-106212747-1
chr5	113376632	113376780	Merged-chr5-113376706-1
chr15	8968347	8968495	Merged-chr15-8968421-2
chr8	71526714	71526862	Merged-chr8-71526788-2
chr12	100003292	100003440	Merged-chr12-100003366-2
chr4	133263019	133263167	Merged-chr4-133263093-2
chr17	24936571	24936719	Merged-chr17-24936645-1
chr16	93907268	93907416	Merged-chr16-93907342-1
chr11	46041277	46041425	Merged-chr11-46041351-2
chr10	60791082	60791230	Merged-chr10-60791156-1
chr11	31398770	31398918	Merged-chr11-31398844-2
chr13	55504435	55504583	Merged-chr13-55504509-2
chr11	99837421	99837569	Merged-chr11-99837495-2
chr19	46518134	46518282	Merged-chr19-46518208-2
chr6	88886502	88886650	Merged-chr6-88886576-2
chr13	114171207	114171355	Merged-chr13-114171281-2
chr8	70408496	70408644	Merged-chr8-70408570-2
chr8	84039497	84039645	Merged-chr8-84039571-2
chr8	122698545	122698693	Merged-chr8-122698619-2
chr7	117278438	117278586	Merged-chr7-117278512-2
chr5	148740945	148741093	Merged-chr5-148741019-2
chr18	67330342	67330490	Merged-chr18-67330416-2
chr13	107668625	107668773	Merged-chr13-107668699-2
chr5	143288503	143288651	Merged-chr5-143288577-1
chr17	36355472	36355620	Merged-chr17-36355546-2
chr4	145408995	145409143	Merged-chr4-145409069-1
chr14	78462382	78462530	Merged-chr14-78462456-1
chr2	164435679	164435827	Merged-chr2-164435753-2
chr4	134773549	134773697	Merged-chr4-134773623-2
chr4	34239726	34239874	Merged-chr4-34239800-2
chr19	22887143	22887291	Merged-chr19-22887217-2
chr19	21816316	21816464	Merged-chr19-21816390-2
chr16	97488399	97488547	Merged-chr16-97488473-2
chr16	10328130	10328278	Merged-chr16-10328204-2
chr1	190634981	190635129	Merged-chr1-190635055-2
chr3	135580539	135580687	Merged-chr3-135580613-2
chr9	43659265	43659413	Merged-chr9-43659339-2
chr10	28801018	28801166	Merged-chr10-28801092-2
chr8	122709393	122709541	Merged-chr8-122709467-1
chr4	147416552	147416700	Merged-chr4-147416626-1
chr7	126167713	126167861	Merged-chr7-126167787-1
chr9	65631370	65631518	Merged-chr9-65631444-1
chr15	82274897	82275045	Merged-chr15-82274971-2
chr19	53768459	53768607	Merged-chr19-53768533-2
chr4	11053854	11054002	Merged-chr4-11053928-2
chr4	134122425	134122573	Merged-chr4-134122499-2
chr11	99583319	99583467	Merged-chr11-99583393-2
chr10	127054855	127055003	Merged-chr10-127054929-2
chr3	108035965	108036113	Merged-chr3-108036039-2
chr7	143401563	143401711	Merged-chr7-143401637-2
chr4	134753928	134754076	Merged-chr4-134754002-1
chr1	85080733	85080881	Merged-chr1-85080807-1
chr4	153358235	153358383	Merged-chr4-153358309-2
chr11	98849399	98849547	Merged-chr11-98849473-2
chr11	99897550	99897698	Merged-chr11-99897624-2
chr8	105973802	105973950	Merged-chr8-105973876-2
chr8	122318098	122318246	Merged-chr8-122318172-2
chr15	99792477	99792625	Merged-chr15-99792551-2
chr1	86301384	86301532	Merged-chr1-86301458-2
chr9	102692667	102692815	Merged-chr9-102692741-2
chr10	123032263	123032411	Merged-chr10-123032337-2
chr9	104356058	104356206	Merged-chr9-104356132-2
chr6	88981699	88981847	Merged-chr6-88981773-2
chr6	147377806	147377954	Merged-chr6-147377880-2
chr9	65196540	65196688	Merged-chr9-65196614-1
chr7	113710965	113711113	Merged-chr7-113711039-1
chr6	55108470	55108618	Merged-chr6-55108544-1
chr11	60161412	60161560	Merged-chr11-60161486-2
chr11	100746706	100746854	Merged-chr11-100746780-2
chr12	51166119	51166267	Merged-chr12-51166193-2
chr10	44730847	44730995	Merged-chr10-44730921-2
chr11	76328945	76329093	Merged-chr11-76329019-2
chr1	92365625	92365773	Merged-chr1-92365699-2
chr7	4251200	4251348	Merged-chr7-4251274-2
chr5	28093288	28093436	Merged-chr5-28093362-2
chr6	34942556	34942704	Merged-chr6-34942630-2
chr13	12940939	12941087	Merged-chr13-12941013-1
chr17	35824521	35824669	Merged-chr17-35824595-1
chr16	17757896	17758044	Merged-chr16-17757970-1
chr8	70181997	70182145	Merged-chr8-70182071-1
chr5	134152048	134152196	Merged-chr5-134152122-1
chr3	95989022	95989170	Merged-chr3-95989096-1
chr6	39435221	39435369	Merged-chr6-39435295-2
chr2	30779849	30779997	Merged-chr2-30779923-2
chr17	49368384	49368532	Merged-chr17-49368458-1
chr7	46347857	46348005	Merged-chr7-46347931-1
chr13	34746720	34746868	Merged-chr13-34746794-2
chr17	47711963	47712111	Merged-chr17-47712037-2
chr4	130282978	130283126	Merged-chr4-130283052-2
chr12	86804951	86805099	Merged-chr12-86805025-2
chr4	127106952	127107100	Merged-chr4-127107026-2
chr10	7149914	7150062	Merged-chr10-7149988-2
chr10	80387207	80387355	Merged-chr10-80387281-2
chr3	8703024	8703172	Merged-chr3-8703098-2
chr10	72588686	72588834	Merged-chr10-72588760-2
chr15	83991519	83991667	Merged-chr15-83991593-1
chr6	49236438	49236586	Merged-chr6-49236512-1
chr13	76003766	76003914	Merged-chr13-76003840-1
chr11	74629981	74630129	Merged-chr11-74630055-1
chr4	117189913	117190061	Merged-chr4-117189987-1
chr19	5810750	5810898	Merged-chr19-5810824-1
chr15	76817032	76817180	Merged-chr15-76817106-1
chr17	28150129	28150277	Merged-chr17-28150203-2
chr17	29469152	29469300	Merged-chr17-29469226-2
chr4	156055334	156055482	Merged-chr4-156055408-2
chr10	125906579	125906727	Merged-chr10-125906653-2
chr12	54326677	54326825	Merged-chr12-54326751-2
chr4	153567811	153567959	Merged-chr4-153567885-2
chr4	120071721	120071869	Merged-chr4-120071795-2
chr11	35610207	35610355	Merged-chr11-35610281-2
chr10	61366020	61366168	Merged-chr10-61366094-2
chr2	165900354	165900502	Merged-chr2-165900428-2
chr8	116608013	116608161	Merged-chr8-116608087-2
chr10	81544776	81544924	Merged-chr10-81544850-1
chr18	34535769	34535917	Merged-chr18-34535843-1
chr19	36945123	36945271	Merged-chr19-36945197-1
chr4	117210823	117210971	Merged-chr4-117210897-1
chr8	124273218	124273366	Merged-chr8-124273292-1
chr2	163032793	163032941	Merged-chr2-163032867-1
chr14	64585415	64585563	Merged-chr14-64585489-1
chr5	38781533	38781681	Merged-chr5-38781607-1
chr4	125720624	125720772	Merged-chr4-125720698-2
chr6	30121673	30121821	Merged-chr6-30121747-2
chr12	111696311	111696459	Merged-chr12-111696385-2
chr8	84351073	84351221	Merged-chr8-84351147-2
chr13	100990771	100990919	Merged-chr13-100990845-2
chr11	8572913	8573061	Merged-chr11-8572987-2
chr1	55524084	55524232	Merged-chr1-55524158-2
chr7	134550501	134550649	Merged-chr7-134550575-2
chr10	122300237	122300385	Merged-chr10-122300311-2
chr14	62425276	62425424	Merged-chr14-62425350-2
chr5	140857403	140857551	Merged-chr5-140857477-2
chr3	100925267	100925415	Merged-chr3-100925341-2
chr15	96297212	96297360	Merged-chr15-96297286-2
chr3	34777071	34777219	Merged-chr3-34777145-2
chr7	35447481	35447629	Merged-chr7-35447555-2
chr5	38319075	38319223	Merged-chr5-38319149-1
chr2	32302790	32302938	Merged-chr2-32302864-1
chr15	36716471	36716619	Merged-chr15-36716545-2
chr17	34981663	34981811	Merged-chr17-34981737-2
chr1	37546989	37547137	Merged-chr1-37547063-2
chr2	131190386	131190534	Merged-chr2-131190460-2
chr15	58063283	58063431	Merged-chr15-58063357-2
chr17	46093271	46093419	Merged-chr17-46093345-2
chr13	51378349	51378497	Merged-chr13-51378423-2
chr9	62166239	62166387	Merged-chr9-62166313-1
chr8	124905588	124905736	Merged-chr8-124905662-2
chr2	180472304	180472452	Merged-chr2-180472378-2
chr4	43795874	43796022	Merged-chr4-43795948-2
chr4	155780897	155781045	Merged-chr4-155780971-2
chr10	77798945	77799093	Merged-chr10-77799019-2
chr1	185984891	185985039	Merged-chr1-185984965-2
chr10	90904237	90904385	Merged-chr10-90904311-2
chr7	80963726	80963874	Merged-chr7-80963800-2
chr5	135249113	135249261	Merged-chr5-135249187-2
chr2	157027362	157027510	Merged-chr2-157027436-2
chr15	100074845	100074993	Merged-chr15-100074919-1
chr1	68049880	68050028	Merged-chr1-68049954-2
chr8	47371749	47371897	Merged-chr8-47371823-1
chr7	28505710	28505858	Merged-chr7-28505784-1
chr1	74809140	74809288	Merged-chr1-74809214-1
chr3	95887767	95887915	Merged-chr3-95887841-1
chr5	24797997	24798145	Merged-chr5-24798071-1
chr5	116525717	116525865	Merged-chr5-116525791-1
chr5	114332938	114333086	Merged-chr5-114333012-2
chr11	97808773	97808921	Merged-chr11-97808847-2
chr6	89860048	89860196	Merged-chr6-89860122-2
chr16	10887597	10887745	Merged-chr16-10887671-2
chr2	126871466	126871614	Merged-chr2-126871540-2
chr12	29130236	29130384	Merged-chr12-29130310-2
chr4	119939866	119940014	Merged-chr4-119939940-2
chr4	140171447	140171595	Merged-chr4-140171521-2
chr16	8481777	8481925	Merged-chr16-8481851-2
chr17	28388648	28388796	Merged-chr17-28388722-2
chr10	62241852	62242000	Merged-chr10-62241926-2
chr7	19084454	19084602	Merged-chr7-19084528-2
chr7	43777902	43778050	Merged-chr7-43777976-2
chr5	125111217	125111365	Merged-chr5-125111291-2
chr5	139355584	139355732	Merged-chr5-139355658-2
chr7	29471464	29471612	Merged-chr7-29471538-2
chr7	64235436	64235584	Merged-chr7-64235510-2
chr18	4980411	4980559	Merged-chr18-4980485-2
chr18	56720239	56720387	Merged-chr18-56720313-2
chr14	118640903	118641051	Merged-chr14-118640977-2
chr10	40465756	40465904	Merged-chr10-40465830-2
chr10	77130165	77130313	Merged-chr10-77130239-2
chr9	65823821	65823969	Merged-chr9-65823895-2
chr6	135294687	135294835	Merged-chr6-135294761-2
chr6	39494265	39494413	Merged-chr6-39494339-2
chr2	152117241	152117389	Merged-chr2-152117315-2
chr13	70379393	70379541	Merged-chr13-70379467-2
chr15	8279374	8279522	Merged-chr15-8279448-1
chr17	35835707	35835855	Merged-chr17-35835781-1
chr8	75025823	75025971	Merged-chr8-75025897-1
chr4	130775446	130775594	Merged-chr4-130775520-1
chr7	113016029	113016177	Merged-chr7-113016103-1
chr1	134290996	134291144	Merged-chr1-134291070-1
chr18	67329311	67329459	Merged-chr18-67329385-1
chr9	59679079	59679227	Merged-chr9-59679153-1
chr10	79841360	79841508	Merged-chr10-79841434-1
chr4	44984380	44984528	Merged-chr4-44984454-1
chr4	149602942	149603090	Merged-chr4-149603016-1
chr12	71886161	71886309	Merged-chr12-71886235-1
chr9	21719331	21719479	Merged-chr9-21719405-1
chr14	5899910	5900058	Merged-chr14-5899984-1
chr11	108119854	108120002	Merged-chr11-108119928-2
chr9	57402432	57402580	Merged-chr9-57402506-2
chr5	149757234	149757382	Merged-chr5-149757308-2
chr17	49291065	49291213	Merged-chr17-49291139-2
chr2	165470328	165470476	Merged-chr2-165470402-2
chr4	140273136	140273284	Merged-chr4-140273210-2
chr11	118005376	118005524	Merged-chr11-118005450-2
chr11	4147182	4147330	Merged-chr11-4147256-2
chr6	97057593	97057741	Merged-chr6-97057667-2
chr8	121919879	121920027	Merged-chr8-121919953-2
chr16	50457815	50457963	Merged-chr16-50457889-2
chr4	131060802	131060950	Merged-chr4-131060876-2
chr11	118349542	118349690	Merged-chr11-118349616-2
chr11	3120288	3120436	Merged-chr11-3120362-2
chr11	70737843	70737991	Merged-chr11-70737917-2
chr4	57855455	57855603	Merged-chr4-57855529-2
chr19	31461135	31461283	Merged-chr19-31461209-2
chr10	61009240	61009388	Merged-chr10-61009314-2
chr16	6289742	6289890	Merged-chr16-6289816-2
chr3	88147577	88147725	Merged-chr3-88147651-2
chr5	122799977	122800125	Merged-chr5-122800051-2
chr7	135405752	135405900	Merged-chr7-135405826-2
chr9	21987509	21987657	Merged-chr9-21987583-2
chr17	25109445	25109593	Merged-chr17-25109519-2
chr13	11959580	11959728	Merged-chr13-11959654-2
chr13	9834274	9834422	Merged-chr13-9834348-1
chr9	121299462	121299610	Merged-chr9-121299536-1
chr9	52036053	52036201	Merged-chr9-52036127-1
chr15	82968544	82968692	Merged-chr15-82968618-1
chr2	121770718	121770866	Merged-chr2-121770792-1
chr11	84570576	84570724	Merged-chr11-84570650-1
chr19	29999369	29999517	Merged-chr19-29999443-1
chr3	34819606	34819754	Merged-chr3-34819680-1
chr7	45216824	45216972	Merged-chr7-45216898-1
chr6	142937809	142937957	Merged-chr6-142937883-1
chr11	22372888	22373036	Merged-chr11-22372962-2
chr17	50032088	50032236	Merged-chr17-50032162-2
chr11	99602810	99602958	Merged-chr11-99602884-2
chr2	26300222	26300370	Merged-chr2-26300296-2
chr2	26547569	26547717	Merged-chr2-26547643-2
chr8	111452060	111452208	Merged-chr8-111452134-2
chr4	142383392	142383540	Merged-chr4-142383466-2
chr4	140049327	140049475	Merged-chr4-140049401-2
chr15	97472301	97472449	Merged-chr15-97472375-2
chr10	60801510	60801658	Merged-chr10-60801584-2
chr3	28220064	28220212	Merged-chr3-28220138-2
chr1	191268962	191269110	Merged-chr1-191269036-2
chr10	41544596	41544744	Merged-chr10-41544670-2
chr5	116280516	116280664	Merged-chr5-116280590-2
chr6	5819764	5819912	Merged-chr6-5819838-2
chr2	169421478	169421626	Merged-chr2-169421552-2
chr1	85495000	85495148	Merged-chr1-85495074-1
chr17	31789092	31789240	Merged-chr17-31789166-1
chr17	88707923	88708071	Merged-chr17-88707997-2
chr8	27204377	27204525	Merged-chr8-27204451-1
chr5	122393981	122394129	Merged-chr5-122394055-2
chr9	54821770	54821918	Merged-chr9-54821844-1
chr4	133093545	133093693	Merged-chr4-133093619-1
chr5	100751734	100751882	Merged-chr5-100751808-1
chr11	82902037	82902185	Merged-chr11-82902111-2
chr11	101497138	101497286	Merged-chr11-101497212-2
chr13	56671372	56671520	Merged-chr13-56671446-2
chr11	98743755	98743903	Merged-chr11-98743829-2
chr16	21678999	21679147	Merged-chr16-21679073-2
chr4	63436748	63436896	Merged-chr4-63436822-2
chr4	140575041	140575189	Merged-chr4-140575115-2
chr4	129862479	129862627	Merged-chr4-129862553-2
chr12	111701244	111701392	Merged-chr12-111701318-2
chr3	37966298	37966446	Merged-chr3-37966372-2
chr3	103460996	103461144	Merged-chr3-103461070-2
chr5	120601363	120601511	Merged-chr5-120601437-2
chr7	128058696	128058844	Merged-chr7-128058770-2
chr1	185879190	185879338	Merged-chr1-185879264-2
chr10	69817103	69817251	Merged-chr10-69817177-2
chr2	164821184	164821332	Merged-chr2-164821258-2
chr17	49717752	49717900	Merged-chr17-49717826-2
chr2	154581580	154581728	Merged-chr2-154581654-1
chr17	46651211	46651359	Merged-chr17-46651285-2
chr15	79883019	79883167	Merged-chr15-79883093-1
chr8	125271491	125271639	Merged-chr8-125271565-1
chr11	32619350	32619498	Merged-chr11-32619424-1
chr10	77847630	77847778	Merged-chr10-77847704-1
chr14	33535444	33535592	Merged-chr14-33535518-1
chr9	118537425	118537573	Merged-chr9-118537499-1
chr11	82882772	82882920	Merged-chr11-82882846-2
chr13	55484670	55484818	Merged-chr13-55484744-2
chr5	35211517	35211665	Merged-chr5-35211591-2
chr8	105330015	105330163	Merged-chr8-105330089-2
chr2	169360193	169360341	Merged-chr2-169360267-2
chr8	92011118	92011266	Merged-chr8-92011192-2
chr8	93896971	93897119	Merged-chr8-93897045-2
chr15	76012887	76013035	Merged-chr15-76012961-2
chr7	141110957	141111105	Merged-chr7-141111031-2
chr9	62180637	62180785	Merged-chr9-62180711-2
chr14	56278493	56278641	Merged-chr14-56278567-2
chr14	7752707	7752855	Merged-chr14-7752781-2
chr10	10458096	10458244	Merged-chr10-10458170-2
chr10	9795691	9795839	Merged-chr10-9795765-2
chr10	42170203	42170351	Merged-chr10-42170277-1
chr5	113536908	113537056	Merged-chr5-113536982-1
chr14	37136395	37136543	Merged-chr14-37136469-2
chr11	99580706	99580854	Merged-chr11-99580780-1
chr16	94698810	94698958	Merged-chr16-94698884-1
chr16	95684528	95684676	Merged-chr16-95684602-1
chr5	113217757	113217905	Merged-chr5-113217831-1
chr13	20188320	20188468	Merged-chr13-20188394-2
chr5	111753670	111753818	Merged-chr5-111753744-2
chr11	99597924	99598072	Merged-chr11-99597998-2
chr6	38495760	38495908	Merged-chr6-38495834-2
chr16	9030092	9030240	Merged-chr16-9030166-2
chr4	123746636	123746784	Merged-chr4-123746710-2
chr8	106964538	106964686	Merged-chr8-106964612-2
chr8	13001670	13001818	Merged-chr8-13001744-2
chr4	45139883	45140031	Merged-chr4-45139957-2
chr19	47222690	47222838	Merged-chr19-47222764-2
chr15	101116989	101117137	Merged-chr15-101117063-2
chr1	182953479	182953627	Merged-chr1-182953553-2
chr10	39161775	39161923	Merged-chr10-39161849-2
chr13	14092624	14092772	Merged-chr13-14092698-2
chr4	146055412	146055560	Merged-chr4-146055486-1
chr9	97642242	97642390	Merged-chr9-97642316-1
chr11	5840406	5840554	Merged-chr11-5840480-2
chr11	117521968	117522116	Merged-chr11-117522042-1
chr8	121921553	121921701	Merged-chr8-121921627-1
chr18	20950382	20950530	Merged-chr18-20950456-1
chr1	133693642	133693790	Merged-chr1-133693716-2
chr11	101131862	101132010	Merged-chr11-101131936-2
chr6	117028843	117028991	Merged-chr6-117028917-2
chr8	124967184	124967332	Merged-chr8-124967258-2
chr12	104644799	104644947	Merged-chr12-104644873-2
chr19	3930446	3930594	Merged-chr19-3930520-2
chr14	33548358	33548506	Merged-chr14-33548432-2
chr1	132360886	132361034	Merged-chr1-132360960-2
chr7	81478392	81478540	Merged-chr7-81478466-2
chr18	81401437	81401585	Merged-chr18-81401511-2
chr1	9997789	9997937	Merged-chr1-9997863-2
chr1	176975013	176975161	Merged-chr1-176975087-2
chr5	28169517	28169665	Merged-chr5-28169591-2
chr10	78091187	78091335	Merged-chr10-78091261-2
chr10	43992256	43992404	Merged-chr10-43992330-2
chr7	44602491	44602639	Merged-chr7-44602565-2
chr1	90405067	90405215	Merged-chr1-90405141-1
chr17	27324524	27324672	Merged-chr17-27324598-1
chr8	3428527	3428675	Merged-chr8-3428601-1
chr15	79375209	79375357	Merged-chr15-79375283-1
chr11	117438991	117439139	Merged-chr11-117439065-2
chr11	120164418	120164566	Merged-chr11-120164492-2
chr11	95305689	95305837	Merged-chr11-95305763-2
chr6	92251734	92251882	Merged-chr6-92251808-2
chr8	13337419	13337567	Merged-chr8-13337493-2
chr8	70004438	70004586	Merged-chr8-70004512-2
chr4	133896541	133896689	Merged-chr4-133896615-2
chr1	86612176	86612324	Merged-chr1-86612250-2
chr7	19388871	19389019	Merged-chr7-19388945-2
chr9	47400592	47400740	Merged-chr9-47400666-2
chr10	85328076	85328224	Merged-chr10-85328150-2
chr5	115726656	115726804	Merged-chr5-115726730-2
chr7	30289777	30289925	Merged-chr7-30289851-2
chr6	145587673	145587821	Merged-chr6-145587747-2
chr1	72226269	72226417	Merged-chr1-72226343-1
chr11	61410219	61410367	Merged-chr11-61410293-2
chr16	13976559	13976707	Merged-chr16-13976633-2
chr11	118348526	118348674	Merged-chr11-118348600-1
chr17	15295469	15295617	Merged-chr17-15295543-1
chr11	4163431	4163579	Merged-chr11-4163505-1
chr4	63330352	63330500	Merged-chr4-63330426-1
chr15	36507900	36508048	Merged-chr15-36507974-1
chr15	101235470	101235618	Merged-chr15-101235544-1
chr10	83056365	83056513	Merged-chr10-83056439-1
chr3	88715860	88716008	Merged-chr3-88715934-1
chr7	126069909	126070057	Merged-chr7-126069983-1
chr7	25100068	25100216	Merged-chr7-25100142-1
chr1	161097091	161097239	Merged-chr1-161097165-1
chr1	84988765	84988913	Merged-chr1-84988839-1
chr1	85235644	85235792	Merged-chr1-85235718-1
chr9	106646739	106646887	Merged-chr9-106646813-1
chr10	77690523	77690671	Merged-chr10-77690597-1
chr11	60722766	60722914	Merged-chr11-60722840-2
chr11	101601013	101601161	Merged-chr11-101601087-2
chr11	99809629	99809777	Merged-chr11-99809703-2
chr11	100728683	100728831	Merged-chr11-100728757-2
chr9	120291946	120292094	Merged-chr9-120292020-2
chr15	88189478	88189626	Merged-chr15-88189552-2
chr11	117475065	117475213	Merged-chr11-117475139-2
chr11	52188589	52188737	Merged-chr11-52188663-2
chr11	69362133	69362281	Merged-chr11-69362207-2
chr1	89998804	89998952	Merged-chr1-89998878-2
chr2	179391949	179392097	Merged-chr2-179392023-2
chr4	148068353	148068501	Merged-chr4-148068427-2
chr11	114560050	114560198	Merged-chr11-114560124-2
chr8	125794689	125794837	Merged-chr8-125794763-2
chr16	13428995	13429143	Merged-chr16-13429069-2
chr16	30050987	30051135	Merged-chr16-30051061-2
chr2	18955182	18955330	Merged-chr2-18955256-2
chr2	27746387	27746535	Merged-chr2-27746461-2
chr2	107061660	107061808	Merged-chr2-107061734-2
chr12	111136094	111136242	Merged-chr12-111136168-2
chr12	111021252	111021400	Merged-chr12-111021326-2
chr12	84729697	84729845	Merged-chr12-84729771-2
chr10	42163668	42163816	Merged-chr10-42163742-2
chr8	13503403	13503551	Merged-chr8-13503477-2
chr4	154183095	154183243	Merged-chr4-154183169-2
chr19	58691319	58691467	Merged-chr19-58691393-2
chr19	5394298	5394446	Merged-chr19-5394372-2
chr19	10362396	10362544	Merged-chr19-10362470-2
chr15	84657526	84657674	Merged-chr15-84657600-2
chr15	77793212	77793360	Merged-chr15-77793286-2
chr15	34877101	34877249	Merged-chr15-34877175-2
chr15	97342537	97342685	Merged-chr15-97342611-2
chr15	59189510	59189658	Merged-chr15-59189584-2
chr10	77814716	77814864	Merged-chr10-77814790-2
chr10	63555716	63555864	Merged-chr10-63555790-2
chr7	81475505	81475653	Merged-chr7-81475579-2
chr3	36506446	36506594	Merged-chr3-36506520-2
chr3	96015788	96015936	Merged-chr3-96015862-2
chr1	93194561	93194709	Merged-chr1-93194635-2
chr18	11892357	11892505	Merged-chr18-11892431-2
chr9	25795630	25795778	Merged-chr9-25795704-2
chr14	79639403	79639551	Merged-chr14-79639477-2
chr5	132712902	132713050	Merged-chr5-132712976-2
chr7	43775861	43776009	Merged-chr7-43775935-2
chr9	29536539	29536687	Merged-chr9-29536613-2
chr7	80160263	80160411	Merged-chr7-80160337-2
chr6	97260034	97260182	Merged-chr6-97260108-2
chr7	29865304	29865452	Merged-chr7-29865378-2
chr6	32770059	32770207	Merged-chr6-32770133-2
chr2	163449414	163449562	Merged-chr2-163449488-2
chr2	75750463	75750611	Merged-chr2-75750537-2
chr8	12519768	12519916	Merged-chr8-12519842-2
chr4	146173504	146173652	Merged-chr4-146173578-1
chr4	147122424	147122572	Merged-chr4-147122498-1
chrX	76174740	76174888	Merged-chrX-76174814-1
chr2	58711657	58711805	Merged-chr2-58711731-1
chr4	137684965	137685113	Merged-chr4-137685039-1
chr12	83525524	83525672	Merged-chr12-83525598-1
chr12	78350909	78351057	Merged-chr12-78350983-1
chr18	42975909	42976057	Merged-chr18-42975983-1
chr14	5904288	5904436	Merged-chr14-5904362-1
chr9	121932644	121932792	Merged-chr9-121932718-1
chr7	19951916	19952064	Merged-chr7-19951990-2
chr15	38251136	38251284	Merged-chr15-38251210-1
chr17	68937678	68937826	Merged-chr17-68937752-1
chr10	25270256	25270404	Merged-chr10-25270330-1
chr3	27205099	27205247	Merged-chr3-27205173-1
chr18	46878758	46878906	Merged-chr18-46878832-1
chr14	63489382	63489530	Merged-chr14-63489456-1
chr11	99634782	99634930	Merged-chr11-99634856-2
chr11	99949244	99949392	Merged-chr11-99949318-2
chr5	26277054	26277202	Merged-chr5-26277128-2
chr17	87272702	87272850	Merged-chr17-87272776-2
chr11	114650731	114650879	Merged-chr11-114650805-2
chr11	118043441	118043589	Merged-chr11-118043515-2
chr1	43136638	43136786	Merged-chr1-43136712-2
chr1	125390257	125390405	Merged-chr1-125390331-2
chr2	172412548	172412696	Merged-chr2-172412622-2
chr8	105833843	105833991	Merged-chr8-105833917-2
chr8	20330102	20330250	Merged-chr8-20330176-2
chr12	104534681	104534829	Merged-chr12-104534755-2
chr8	123523938	123524086	Merged-chr8-123524012-2
chr8	108744180	108744328	Merged-chr8-108744254-2
chr8	13929353	13929501	Merged-chr8-13929427-2
chr8	127006419	127006567	Merged-chr8-127006493-2
chr4	48036047	48036195	Merged-chr4-48036121-2
chr19	46373784	46373932	Merged-chr19-46373858-2
chr19	31255922	31256070	Merged-chr19-31255996-2
chr3	136699804	136699952	Merged-chr3-136699878-2
chr3	57535843	57535991	Merged-chr3-57535917-2
chr3	31975068	31975216	Merged-chr3-31975142-2
chr5	26725628	26725776	Merged-chr5-26725702-2
chr18	81669204	81669352	Merged-chr18-81669278-2
chr18	46879083	46879231	Merged-chr18-46879157-2
chr18	76657828	76657976	Merged-chr18-76657902-2
chr1	136859575	136859723	Merged-chr1-136859649-2
chr1	161002220	161002368	Merged-chr1-161002294-2
chr9	36993442	36993590	Merged-chr9-36993516-2
chr9	63462400	63462548	Merged-chr9-63462474-2
chr9	118653796	118653944	Merged-chr9-118653870-2
chr5	116473944	116474092	Merged-chr5-116474018-2
chr5	112182783	112182931	Merged-chr5-112182857-2
chr5	145665906	145666054	Merged-chr5-145665980-2
chr6	94651662	94651810	Merged-chr6-94651736-2
chr2	164671067	164671215	Merged-chr2-164671141-2
chr2	168423270	168423418	Merged-chr2-168423344-2
chr2	135887905	135888053	Merged-chr2-135887979-2
chr13	12919822	12919970	Merged-chr13-12919896-1
chr17	31307866	31308014	Merged-chr17-31307940-2
chr4	146742160	146742308	Merged-chr4-146742234-1
chr4	7856823	7856971	Merged-chr4-7856897-1
chr4	151313613	151313761	Merged-chr4-151313687-1
chr2	172932204	172932352	Merged-chr2-172932278-1
chr16	35556968	35557116	Merged-chr16-35557042-1
chr16	37477200	37477348	Merged-chr16-37477274-1
chr16	52083246	52083394	Merged-chr16-52083320-1
chr6	99904147	99904295	Merged-chr6-99904221-1
chr11	69459922	69460070	Merged-chr11-69459996-2
chr9	66658828	66658976	Merged-chr9-66658902-2
chr16	32117876	32118024	Merged-chr16-32117950-2
chr4	117317823	117317971	Merged-chr4-117317897-2
chr15	78486689	78486837	Merged-chr15-78486763-2
chr11	99851288	99851436	Merged-chr11-99851362-2
chr16	91693296	91693444	Merged-chr16-91693370-2
chr3	86993195	86993343	Merged-chr3-86993269-2
chr3	128641156	128641304	Merged-chr3-128641230-2
chr1	88674511	88674659	Merged-chr1-88674585-2
chr1	89492393	89492541	Merged-chr1-89492467-2
chr9	57524887	57525035	Merged-chr9-57524961-2
chr7	142174844	142174992	Merged-chr7-142174918-2
chr6	50279270	50279418	Merged-chr6-50279344-2
chr17	27099845	27099993	Merged-chr17-27099919-2
chr7	111074015	111074163	Merged-chr7-111074089-1
chr10	127276383	127276531	Merged-chr10-127276457-2
chr17	29617202	29617350	Merged-chr17-29617276-2
chr9	43441132	43441280	Merged-chr9-43441206-1
chr5	26413091	26413239	Merged-chr5-26413165-2
chr17	26442451	26442599	Merged-chr17-26442525-2
chr1	120210931	120211079	Merged-chr1-120211005-2
chr4	131912704	131912852	Merged-chr4-131912778-2
chr17	7187107	7187255	Merged-chr17-7187181-2
chr7	142212174	142212322	Merged-chr7-142212248-2
chr7	127084919	127085067	Merged-chr7-127084993-2
chr4	155276887	155277035	Merged-chr4-155276961-1
chr1	85624960	85625108	Merged-chr1-85625034-1
chr9	107570408	107570556	Merged-chr9-107570482-1
chr3	67504779	67504927	Merged-chr3-67504853-2
chr11	78695977	78696125	Merged-chr11-78696051-2
chr11	75572320	75572468	Merged-chr11-75572394-2
chr5	105001207	105001355	Merged-chr5-105001281-2
chr11	4940418	4940566	Merged-chr11-4940492-2
chr1	171125999	171126147	Merged-chr1-171126073-2
chr2	31436301	31436449	Merged-chr2-31436375-2
chr11	102957023	102957171	Merged-chr11-102957097-2
chr2	25035028	25035176	Merged-chr2-25035102-2
chr16	17977612	17977760	Merged-chr16-17977686-2
chr12	112206732	112206880	Merged-chr12-112206806-2
chr8	70533300	70533448	Merged-chr8-70533374-2
chr5	109875727	109875875	Merged-chr5-109875801-2
chr5	101095602	101095750	Merged-chr5-101095676-2
chr4	134430475	134430623	Merged-chr4-134430549-1
chr5	31265181	31265329	Merged-chr5-31265255-1
chr7	45639598	45639746	Merged-chr7-45639672-2
chr11	59640337	59640485	Merged-chr11-59640411-2
chr15	83673169	83673317	Merged-chr15-83673243-2
chr11	118376527	118376675	Merged-chr11-118376601-2
chr13	40669900	40670048	Merged-chr13-40669974-2
chr2	162934509	162934657	Merged-chr2-162934583-1
chr7	45191807	45191955	Merged-chr7-45191881-1
chr7	42600081	42600229	Merged-chr7-42600155-1
chr7	142251081	142251229	Merged-chr7-142251155-1
chr11	99815064	99815212	Merged-chr11-99815138-2
chr9	61128164	61128312	Merged-chr9-61128238-2
chr9	58521422	58521570	Merged-chr9-58521496-2
chr5	135970323	135970471	Merged-chr5-135970397-2
chr11	115357559	115357707	Merged-chr11-115357633-2
chr1	74424081	74424229	Merged-chr1-74424155-2
chr6	51537058	51537206	Merged-chr6-51537132-2
chr12	17652793	17652941	Merged-chr12-17652867-2
chr11	117451683	117451831	Merged-chr11-117451757-2
chr12	69076777	69076925	Merged-chr12-69076851-2
chr5	21617772	21617920	Merged-chr5-21617846-2
chr5	118317567	118317715	Merged-chr5-118317641-2
chr2	31869816	31869964	Merged-chr2-31869890-2
chr17	31479180	31479328	Merged-chr17-31479254-2
chr5	120976138	120976286	Merged-chr5-120976212-1
chr11	108916211	108916359	Merged-chr11-108916285-1
chr17	24769245	24769393	Merged-chr17-24769319-1
chr13	113678315	113678463	Merged-chr13-113678389-2
chr5	110372163	110372311	Merged-chr5-110372237-2
chr11	49589059	49589207	Merged-chr11-49589133-2
chr19	25646964	25647112	Merged-chr19-25647038-2
chr2	91309682	91309830	Merged-chr2-91309756-2
chr2	155142226	155142374	Merged-chr2-155142300-2
chr10	111190718	111190866	Merged-chr10-111190792-2
chr7	45226319	45226467	Merged-chr7-45226393-2
chr18	85299658	85299806	Merged-chr18-85299732-2
chr16	22216351	22216499	Merged-chr16-22216425-1
chr2	28538027	28538175	Merged-chr2-28538101-1
chr6	60929776	60929924	Merged-chr6-60929850-2
chr4	57851487	57851635	Merged-chr4-57851561-2
chr7	4846937	4847085	Merged-chr7-4847011-1
chr4	147127346	147127494	Merged-chr4-147127420-1
chr13	48944654	48944802	Merged-chr13-48944728-1
chr15	41123080	41123228	Merged-chr15-41123154-1
chr15	78388925	78389073	Merged-chr15-78388999-1
chr17	28777839	28777987	Merged-chr17-28777913-1
chr17	46852625	46852773	Merged-chr17-46852699-1
chr17	73054324	73054472	Merged-chr17-73054398-1
chr11	61081667	61081815	Merged-chr11-61081741-1
chr6	29419102	29419250	Merged-chr6-29419176-1
chr6	5051258	5051406	Merged-chr6-5051332-1
chr16	13765979	13766127	Merged-chr16-13766053-1
chr8	24778994	24779142	Merged-chr8-24779068-1
chr11	69887958	69888106	Merged-chr11-69888032-1
chr4	141415906	141416054	Merged-chr4-141415980-1
chr19	53748809	53748957	Merged-chr19-53748883-1
chr10	41671407	41671555	Merged-chr10-41671481-1
chr18	83543822	83543970	Merged-chr18-83543896-1
chr10	91070449	91070597	Merged-chr10-91070523-1
chr3	84185267	84185415	Merged-chr3-84185341-1
chr7	99632385	99632533	Merged-chr7-99632459-1
chr1	134443437	134443585	Merged-chr1-134443511-1
chr13	57949598	57949746	Merged-chr13-57949672-1
chr13	59096641	59096789	Merged-chr13-59096715-1
chr13	66640879	66641027	Merged-chr13-66640953-1
chr11	119282650	119282798	Merged-chr11-119282724-2
chr11	85969480	85969628	Merged-chr11-85969554-2
chr11	99591132	99591280	Merged-chr11-99591206-2
chr11	51176129	51176277	Merged-chr11-51176203-2
chr11	99858188	99858336	Merged-chr11-99858262-2
chr11	55264426	55264574	Merged-chr11-55264500-2
chr13	64226911	64227059	Merged-chr13-64226985-2
chr9	121541609	121541757	Merged-chr9-121541683-2
chr9	62675959	62676107	Merged-chr9-62676033-2
chr9	64497431	64497579	Merged-chr9-64497505-2
chr15	73506778	73506926	Merged-chr15-73506852-2
chr15	78648157	78648305	Merged-chr15-78648231-2
chr15	100770535	100770683	Merged-chr15-100770609-2
chr15	101397035	101397183	Merged-chr15-101397109-2
chr5	114166370	114166518	Merged-chr5-114166444-2
chr5	101925878	101926026	Merged-chr5-101925952-2
chr5	30728889	30729037	Merged-chr5-30728963-2
chr17	27037148	27037296	Merged-chr17-27037222-2
chr17	28154104	28154252	Merged-chr17-28154178-2
chr17	66545977	66546125	Merged-chr17-66546051-2
chr11	99846835	99846983	Merged-chr11-99846909-2
chr11	99785544	99785692	Merged-chr11-99785618-2
chr1	154759030	154759178	Merged-chr1-154759104-2
chr2	163883309	163883457	Merged-chr2-163883383-2
chr2	121101589	121101737	Merged-chr2-121101663-2
chr2	14177176	14177324	Merged-chr2-14177250-2
chr17	29627123	29627271	Merged-chr17-29627197-2
chr17	53490456	53490604	Merged-chr17-53490530-2
chr4	138465589	138465737	Merged-chr4-138465663-2
chr4	151922190	151922338	Merged-chr4-151922264-2
chr11	102209829	102209977	Merged-chr11-102209903-2
chr11	117153726	117153874	Merged-chr11-117153800-2
chr11	78411365	78411513	Merged-chr11-78411439-2
chr8	72590754	72590902	Merged-chr8-72590828-2
chr8	110488414	110488562	Merged-chr8-110488488-2
chr16	91693697	91693845	Merged-chr16-91693771-2
chr16	93309084	93309232	Merged-chr16-93309158-2
chr16	20522567	20522715	Merged-chr16-20522641-2
chr16	90082132	90082280	Merged-chr16-90082206-2
chr16	52084031	52084179	Merged-chr16-52084105-2
chr2	167095511	167095659	Merged-chr2-167095585-2
chr4	119395538	119395686	Merged-chr4-119395612-2
chr12	102344651	102344799	Merged-chr12-102344725-2
chr12	99067352	99067500	Merged-chr12-99067426-2
chr4	104352062	104352210	Merged-chr4-104352136-2
chr4	142205209	142205357	Merged-chr4-142205283-2
chrX	103763241	103763389	Merged-chrX-103763315-2
chr2	32422236	32422384	Merged-chr2-32422310-2
chr2	71344333	71344481	Merged-chr2-71344407-2
chr4	45174854	45175002	Merged-chr4-45174928-2
chr4	107429502	107429650	Merged-chr4-107429576-2
chr4	116819534	116819682	Merged-chr4-116819608-2
chr12	105550523	105550671	Merged-chr12-105550597-2
chr8	119851482	119851630	Merged-chr8-119851556-2
chr4	152572425	152572573	Merged-chr4-152572499-2
chr4	130097281	130097429	Merged-chr4-130097355-2
chr4	134972962	134973110	Merged-chr4-134973036-2
chr4	131283830	131283978	Merged-chr4-131283904-2
chr4	138883797	138883945	Merged-chr4-138883871-2
chr4	59610593	59610741	Merged-chr4-59610667-2
chr19	50162473	50162621	Merged-chr19-50162547-2
chr15	101494350	101494498	Merged-chr15-101494424-2
chr15	76976741	76976889	Merged-chr15-76976815-2
chr15	99236211	99236359	Merged-chr15-99236285-2
chr15	98743964	98744112	Merged-chr15-98744038-2
chr15	83453905	83454053	Merged-chr15-83453979-2
chr15	100965181	100965329	Merged-chr15-100965255-2
chr11	70724460	70724608	Merged-chr11-70724534-2
chr11	99665554	99665702	Merged-chr11-99665628-2
chr11	52479608	52479756	Merged-chr11-52479682-2
chr10	22196599	22196747	Merged-chr10-22196673-2
chr12	11782205	11782353	Merged-chr12-11782279-2
chr18	24132996	24133144	Merged-chr18-24133070-2
chr14	12103352	12103500	Merged-chr14-12103426-2
chr14	32095761	32095909	Merged-chr14-32095835-2
chr7	142229440	142229588	Merged-chr7-142229514-2
chr7	132431292	132431440	Merged-chr7-132431366-2
chr7	29836948	29837096	Merged-chr7-29837022-2
chr10	95271051	95271199	Merged-chr10-95271125-2
chr3	101818640	101818788	Merged-chr3-101818714-2
chr3	32238533	32238681	Merged-chr3-32238607-2
chr3	96666221	96666369	Merged-chr3-96666295-2
chr19	45024752	45024900	Merged-chr19-45024826-2
chr1	131179062	131179210	Merged-chr1-131179136-2
chr1	12505335	12505483	Merged-chr1-12505409-2
chr3	52831209	52831357	Merged-chr3-52831283-2
chr3	54678930	54679078	Merged-chr3-54679004-2
chr5	37729075	37729223	Merged-chr5-37729149-2
chr5	52424846	52424994	Merged-chr5-52424920-2
chr5	122311784	122311932	Merged-chr5-122311858-2
chr5	106044386	106044534	Merged-chr5-106044460-2
chr5	107386587	107386735	Merged-chr5-107386661-2
chr7	35366286	35366434	Merged-chr7-35366360-2
chr3	9540480	9540628	Merged-chr3-9540554-2
chr7	29506365	29506513	Merged-chr7-29506439-2
chr18	82953004	82953152	Merged-chr18-82953078-2
chr18	81042297	81042445	Merged-chr18-81042371-2
chr18	67348274	67348422	Merged-chr18-67348348-2
chr18	83256013	83256161	Merged-chr18-83256087-2
chr18	23916839	23916987	Merged-chr18-23916913-2
chr9	46242910	46243058	Merged-chr9-46242984-2
chr9	58443132	58443280	Merged-chr9-58443206-2
chr9	65544940	65545088	Merged-chr9-65545014-2
chr9	117790396	117790544	Merged-chr9-117790470-2
chr14	121542973	121543121	Merged-chr14-121543047-2
chr14	31571536	31571684	Merged-chr14-31571610-2
chr9	45979828	45979976	Merged-chr9-45979902-2
chr14	114244582	114244730	Merged-chr14-114244656-2
chr14	63182774	63182922	Merged-chr14-63182848-2
chr14	64174634	64174782	Merged-chr14-64174708-2
chr10	111191161	111191309	Merged-chr10-111191235-2
chr10	7133180	7133328	Merged-chr10-7133254-2
chr10	77836048	77836196	Merged-chr10-77836122-2
chr7	79377751	79377899	Merged-chr7-79377825-2
chr7	68812579	68812727	Merged-chr7-68812653-2
chr7	24641324	24641472	Merged-chr7-24641398-2
chr7	142257786	142257934	Merged-chr7-142257860-2
chr6	100320722	100320870	Merged-chr6-100320796-2
chr6	118431600	118431748	Merged-chr6-118431674-2
chr2	168023638	168023786	Merged-chr2-168023712-2
chr2	166389688	166389836	Merged-chr2-166389762-2
chr2	165693061	165693209	Merged-chr2-165693135-2
chr2	180761819	180761967	Merged-chr2-180761893-2
chr2	167090789	167090937	Merged-chr2-167090863-2
chr2	18893486	18893634	Merged-chr2-18893560-2
chr2	25797659	25797807	Merged-chr2-25797733-2
chr2	105258564	105258712	Merged-chr2-105258638-2
chr2	128911882	128912030	Merged-chr2-128911956-2
chr8	83584856	83585004	Merged-chr8-83584930-2
chr8	121897385	121897533	Merged-chr8-121897459-2
chr17	8205294	8205442	Merged-chr17-8205368-2
chr17	87072297	87072445	Merged-chr17-87072371-2
chr17	8347009	8347157	Merged-chr17-8347083-2
chr17	23722844	23722992	Merged-chr17-23722918-2
chr17	34388094	34388242	Merged-chr17-34388168-2
chr17	34067780	34067928	Merged-chr17-34067854-2
chr17	66546479	66546627	Merged-chr17-66546553-2
chr13	12851916	12852064	Merged-chr13-12851990-1
chr6	83853466	83853614	Merged-chr6-83853540-1
chr8	70429255	70429403	Merged-chr8-70429329-1
chr2	24166992	24167140	Merged-chr2-24167066-1
chr6	127503306	127503454	Merged-chr6-127503380-1
chrX	167207321	167207469	Merged-chrX-167207395-1
chr4	147509476	147509624	Merged-chr4-147509550-1
chr10	58239476	58239624	Merged-chr10-58239550-1
chr16	3116284	3116432	Merged-chr16-3116358-1
chr16	94699190	94699338	Merged-chr16-94699264-1
chr1	85244812	85244960	Merged-chr1-85244886-1
chr5	4054244	4054392	Merged-chr5-4054318-1
chr7	64484975	64485123	Merged-chr7-64485049-1
chr4	62516535	62516683	Merged-chr4-62516609-1
chr9	115448595	115448743	Merged-chr9-115448669-2
chr4	106989012	106989160	Merged-chr4-106989086-1
chr1	85325525	85325673	Merged-chr1-85325599-1
chr9	58005803	58005951	Merged-chr9-58005877-2

## Sheet: MYOD1_open
Chr	St	End	PeakID
chr16	65815189	65815361	Merged-chr16-65815275-2
chr1	193036023	193036195	Merged-chr1-193036109-1
chr18	43687709	43687881	Merged-chr18-43687795-2
chr13	91461068	91461240	Merged-chr13-91461154-2
chr7	63444785	63444957	Merged-chr7-63444871-2
chr2	62664331	62664503	Merged-chr2-62664417-1
chr3	135438303	135438475	Merged-chr3-135438389-2
chr1	130731887	130732059	Merged-chr1-130731973-2
chr13	64432444	64432616	Merged-chr13-64432530-2
chr5	18688591	18688763	Merged-chr5-18688677-2
chr15	63998191	63998363	Merged-chr15-63998277-2
chr8	110217898	110218070	Merged-chr8-110217984-2
chr9	75683846	75684018	Merged-chr9-75683932-1
chr4	80912030	80912202	Merged-chr4-80912116-2
chr8	69717057	69717229	Merged-chr8-69717143-2
chr4	143162207	143162379	Merged-chr4-143162293-2
chr4	74251916	74252088	Merged-chr4-74252002-2
chrX	143543308	143543480	Merged-chrX-143543394-2
chr7	7298751	7298923	Merged-chr7-7298837-1
chr14	64949856	64950028	Merged-chr14-64949942-1
chr17	52601351	52601523	Merged-chr17-52601437-2
chr11	40050604	40050776	Merged-chr11-40050690-2
chr15	75748401	75748573	Merged-chr15-75748487-2
chr14	52257991	52258163	Merged-chr14-52258077-1
chr6	4087020	4087192	Merged-chr6-4087106-1
chr8	112128950	112129122	Merged-chr8-112129036-1
chr6	59169067	59169239	Merged-chr6-59169153-2
chr3	144720193	144720365	Merged-chr3-144720279-2
chr5	34660307	34660479	Merged-chr5-34660393-2
chr2	113829015	113829187	Merged-chr2-113829101-2
chr3	6173849	6174021	Merged-chr3-6173935-1
chr10	96309183	96309355	Merged-chr10-96309269-2
chr14	104467976	104468148	Merged-chr14-104468062-2
chr7	75455277	75455449	Merged-chr7-75455363-2
chr8	67931147	67931319	Merged-chr8-67931233-1
chr9	8035701	8035873	Merged-chr9-8035787-2
chr6	56652094	56652266	Merged-chr6-56652180-1
chr12	40222595	40222767	Merged-chr12-40222681-1
chr10	128909750	128909922	Merged-chr10-128909836-2
chr19	55271593	55271765	Merged-chr19-55271679-1
chr5	14039233	14039405	Merged-chr5-14039319-2
chr15	91078153	91078325	Merged-chr15-91078239-1
chr2	105616566	105616738	Merged-chr2-105616652-1
chr5	134006804	134006976	Merged-chr5-134006890-1
chr2	6872519	6872691	Merged-chr2-6872605-2
chr8	36480340	36480512	Merged-chr8-36480426-2
chr5	81654076	81654248	Merged-chr5-81654162-2
chr12	29096106	29096278	Merged-chr12-29096192-2
chrX	169036412	169036584	Merged-chrX-169036498-2
chr10	128526057	128526229	Merged-chr10-128526143-2
chr1	177441782	177441954	Merged-chr1-177441868-2
chr15	28071194	28071366	Merged-chr15-28071280-2
chr4	13300261	13300433	Merged-chr4-13300347-2
chr16	35490929	35491101	Merged-chr16-35491015-2
chr3	154664207	154664379	Merged-chr3-154664293-2
chr10	82241295	82241467	Merged-chr10-82241381-2
chr17	24550040	24550212	Merged-chr17-24550126-2
chr10	110856137	110856309	Merged-chr10-110856223-2
chr1	55363732	55363904	Merged-chr1-55363818-2
chr5	92042443	92042615	Merged-chr5-92042529-2
chr1	118459108	118459280	Merged-chr1-118459194-1
chr9	94670403	94670575	Merged-chr9-94670489-2
chr2	18392560	18392732	Merged-chr2-18392646-2
chr17	89934071	89934243	Merged-chr17-89934157-2
chr1	86434497	86434669	Merged-chr1-86434583-2
chr12	65073837	65074009	Merged-chr12-65073923-2
chr3	146404418	146404590	Merged-chr3-146404504-2
chr5	34761587	34761759	Merged-chr5-34761673-2
chr5	134099633	134099805	Merged-chr5-134099719-2
chr7	75914123	75914295	Merged-chr7-75914209-2
chr17	15990330	15990502	Merged-chr17-15990416-2
chr13	38109183	38109355	Merged-chr13-38109269-1
chr12	113140301	113140473	Merged-chr12-113140387-2
chr8	114116180	114116352	Merged-chr8-114116266-2
chr3	158031503	158031675	Merged-chr3-158031589-2
chr1	186749319	186749491	Merged-chr1-186749405-2
chr12	59040438	59040610	Merged-chr12-59040524-1
chr14	79769769	79769941	Merged-chr14-79769855-1
chr5	126765345	126765517	Merged-chr5-126765431-2
chr18	36348657	36348829	Merged-chr18-36348743-1
chr17	57070827	57070999	Merged-chr17-57070913-1
chr1	6458069	6458241	Merged-chr1-6458155-1
chr7	87584593	87584765	Merged-chr7-87584679-2
chr12	26068245	26068417	Merged-chr12-26068331-2
chr3	84040171	84040343	Merged-chr3-84040257-1
chr11	31870896	31871068	Merged-chr11-31870982-2
chr10	117376940	117377112	Merged-chr10-117377026-1
chr7	138084040	138084212	Merged-chr7-138084126-1
chr7	6189722	6189894	Merged-chr7-6189808-1
chr6	122764883	122765055	Merged-chr6-122764969-2
chr12	28817508	28817680	Merged-chr12-28817594-2
chr12	65206505	65206677	Merged-chr12-65206591-2
chr8	69121584	69121756	Merged-chr8-69121670-2
chr13	12889730	12889902	Merged-chr13-12889816-1
chr9	120011330	120011502	Merged-chr9-120011416-1
chr8	104509858	104510030	Merged-chr8-104509944-1
chr17	87282793	87282965	Merged-chr17-87282879-2
chr5	119055569	119055741	Merged-chr5-119055655-2
chr7	85104605	85104777	Merged-chr7-85104691-2
chr19	21784439	21784611	Merged-chr19-21784525-2
chr13	3712640	3712812	Merged-chr13-3712726-2
chr14	122416279	122416451	Merged-chr14-122416365-1
chr16	16912020	16912192	Merged-chr16-16912106-2
chr13	54216068	54216240	Merged-chr13-54216154-2
chr12	105322340	105322512	Merged-chr12-105322426-1
chr3	33142892	33143064	Merged-chr3-33142978-2
chr7	63957040	63957212	Merged-chr7-63957126-2
chr8	112404275	112404447	Merged-chr8-112404361-1
chr11	43653193	43653365	Merged-chr11-43653279-1
chr3	37724242	37724414	Merged-chr3-37724328-2
chr7	64839881	64840053	Merged-chr7-64839967-2
chr19	24225017	24225189	Merged-chr19-24225103-2
chr3	18695543	18695715	Merged-chr3-18695629-1
chr6	136470995	136471167	Merged-chr6-136471081-2
chr16	96082788	96082960	Merged-chr16-96082874-1
chr14	105427503	105427675	Merged-chr14-105427589-1
chr9	102690615	102690787	Merged-chr9-102690701-2
chr13	28959743	28959915	Merged-chr13-28959829-2
chr17	69439204	69439376	Merged-chr17-69439290-1
chr8	107425031	107425203	Merged-chr8-107425117-2
chr15	25762370	25762542	Merged-chr15-25762456-2
chr9	37054255	37054427	Merged-chr9-37054341-2
chr17	47511332	47511504	Merged-chr17-47511418-1
chr8	106135154	106135326	Merged-chr8-106135240-2
chr6	70964077	70964249	Merged-chr6-70964163-2
chr17	72603191	72603363	Merged-chr17-72603277-1
chrX	111697059	111697231	Merged-chrX-111697145-1
chr7	30973603	30973775	Merged-chr7-30973689-2
chr10	13641868	13642040	Merged-chr10-13641954-2
chr5	52783117	52783289	Merged-chr5-52783203-2
chr8	3395250	3395422	Merged-chr8-3395336-2
chr17	79364768	79364940	Merged-chr17-79364854-2
chr10	14967744	14967916	Merged-chr10-14967830-2
chr2	58532334	58532506	Merged-chr2-58532420-2
chr13	9329484	9329656	Merged-chr13-9329570-2
chr16	95093841	95094013	Merged-chr16-95093927-1
chr10	128035431	128035603	Merged-chr10-128035517-2
chr7	65454348	65454520	Merged-chr7-65454434-2
chr6	5482301	5482473	Merged-chr6-5482387-2
chr14	25318159	25318331	Merged-chr14-25318245-2
chr5	147076807	147076979	Merged-chr5-147076893-2
chr9	102690141	102690313	Merged-chr9-102690227-2
chr2	101665478	101665650	Merged-chr2-101665564-2
chr3	40745649	40745821	Merged-chr3-40745735-2
chr7	127935528	127935700	Merged-chr7-127935614-2
chr6	97048581	97048753	Merged-chr6-97048667-2
chr1	60432618	60432790	Merged-chr1-60432704-1
chr15	52967898	52968070	Merged-chr15-52967984-2
chr18	35022558	35022730	Merged-chr18-35022644-1
chr10	81037135	81037307	Merged-chr10-81037221-2
chr17	47521753	47521925	Merged-chr17-47521839-2
chr1	190448333	190448505	Merged-chr1-190448419-2
chr17	79355842	79356014	Merged-chr17-79355928-2
chr6	116671134	116671306	Merged-chr6-116671220-2
chr3	98024414	98024586	Merged-chr3-98024500-2
chr15	72689890	72690062	Merged-chr15-72689976-1
chr7	108197052	108197224	Merged-chr7-108197138-2
chr10	25708113	25708285	Merged-chr10-25708199-2
chr8	123332696	123332868	Merged-chr8-123332782-1
chr5	81519503	81519675	Merged-chr5-81519589-2
chr9	36950372	36950544	Merged-chr9-36950458-2
chr3	55226927	55227099	Merged-chr3-55227013-2
chr2	117337009	117337181	Merged-chr2-117337095-1
chr17	3082704	3082876	Merged-chr17-3082790-1
chr16	17530823	17530995	Merged-chr16-17530909-2
chr11	116853671	116853843	Merged-chr11-116853757-1
chr11	41645169	41645341	Merged-chr11-41645255-2
chr12	80216556	80216728	Merged-chr12-80216642-2
chr1	167598408	167598580	Merged-chr1-167598494-2
chr7	133776508	133776680	Merged-chr7-133776594-2
chr11	20145505	20145677	Merged-chr11-20145591-2
chr10	25314217	25314389	Merged-chr10-25314303-1
chr11	115258228	115258400	Merged-chr11-115258314-2
chr1	84868971	84869143	Merged-chr1-84869057-2
chr2	122377428	122377600	Merged-chr2-122377514-2
chr1	24613030	24613202	Merged-chr1-24613116-1
chr17	66111466	66111638	Merged-chr17-66111552-2
chr6	99009907	99010079	Merged-chr6-99009993-2
chr1	72960326	72960498	Merged-chr1-72960412-2
chr7	45162221	45162393	Merged-chr7-45162307-2
chr7	102065064	102065236	Merged-chr7-102065150-2
chr1	53750105	53750277	Merged-chr1-53750191-1
chr14	61648745	61648917	Merged-chr14-61648831-1
chr8	124021375	124021547	Merged-chr8-124021461-2
chr18	72949293	72949465	Merged-chr18-72949379-2
chr18	24259019	24259191	Merged-chr18-24259105-2
chr15	36792798	36792970	Merged-chr15-36792884-2
chr5	120588559	120588731	Merged-chr5-120588645-1
chr5	113164845	113165017	Merged-chr5-113164931-2
chrX	43430744	43430916	Merged-chrX-43430830-2
chr12	70347132	70347304	Merged-chr12-70347218-1
chr9	108567099	108567271	Merged-chr9-108567185-2
chr17	48002011	48002183	Merged-chr17-48002097-2
chr7	19747916	19748088	Merged-chr7-19748002-2
chr17	47736968	47737140	Merged-chr17-47737054-2
chr8	122460658	122460830	Merged-chr8-122460744-2
chr14	78288929	78289101	Merged-chr14-78289015-2
chr7	80746538	80746710	Merged-chr7-80746624-1
chr5	61160274	61160446	Merged-chr5-61160360-2
chr11	6292072	6292244	Merged-chr11-6292158-1
chr19	32242348	32242520	Merged-chr19-32242434-1
chr1	12814534	12814706	Merged-chr1-12814620-2
chr11	9263141	9263313	Merged-chr11-9263227-2
chr4	6093474	6093646	Merged-chr4-6093560-2
chr14	37820028	37820200	Merged-chr14-37820114-1
chr2	78189686	78189858	Merged-chr2-78189772-2
chr1	54485005	54485177	Merged-chr1-54485091-2
chr7	112743814	112743986	Merged-chr7-112743900-1
chr12	25475537	25475709	Merged-chr12-25475623-2
chr3	116807810	116807982	Merged-chr3-116807896-2
chr7	130252244	130252416	Merged-chr7-130252330-2
chr15	73707489	73707661	Merged-chr15-73707575-1
chr8	10946208	10946380	Merged-chr8-10946294-2
chr3	95702136	95702308	Merged-chr3-95702222-2
chr14	54383657	54383829	Merged-chr14-54383743-1
chr1	91414199	91414371	Merged-chr1-91414285-2
chr2	144369145	144369317	Merged-chr2-144369231-2
chr19	36057103	36057275	Merged-chr19-36057189-2
chr6	82402822	82402994	Merged-chr6-82402908-2
chr4	55203842	55204014	Merged-chr4-55203928-2
chr5	105700680	105700852	Merged-chr5-105700766-2
chr5	147293311	147293483	Merged-chr5-147293397-2
chr11	29636950	29637122	Merged-chr11-29637036-2
chr7	126949930	126950102	Merged-chr7-126950016-1
chr7	82625383	82625555	Merged-chr7-82625469-1
chr11	5762102	5762274	Merged-chr11-5762188-2
chr17	64559241	64559413	Merged-chr17-64559327-2
chr17	15380830	15381002	Merged-chr17-15380916-2
chr12	40917512	40917684	Merged-chr12-40917598-2
chr1	189142653	189142825	Merged-chr1-189142739-2
chr13	79867680	79867852	Merged-chr13-79867766-1
chr2	112455402	112455574	Merged-chr2-112455488-1
chr8	122523146	122523318	Merged-chr8-122523232-2
chr17	35697801	35697973	Merged-chr17-35697887-2
chr15	73687724	73687896	Merged-chr15-73687810-2
chr14	13770831	13771003	Merged-chr14-13770917-2
chr9	98726674	98726846	Merged-chr9-98726760-1
chr8	89003458	89003630	Merged-chr8-89003544-2
chr15	9213174	9213346	Merged-chr15-9213260-2
chr5	120424162	120424334	Merged-chr5-120424248-2
chr10	47631634	47631806	Merged-chr10-47631720-2
chr2	105263334	105263506	Merged-chr2-105263420-2
chr3	89090853	89091025	Merged-chr3-89090939-1
chr7	140841219	140841391	Merged-chr7-140841305-2
chr5	107359779	107359951	Merged-chr5-107359865-2
chr12	102949750	102949922	Merged-chr12-102949836-1
chr9	20202232	20202404	Merged-chr9-20202318-1
chr5	127688769	127688941	Merged-chr5-127688855-2
chr11	5741287	5741459	Merged-chr11-5741373-2
chr7	29162816	29162988	Merged-chr7-29162902-2
chr1	127774268	127774440	Merged-chr1-127774354-1
chr3	108856910	108857082	Merged-chr3-108856996-2
chr6	120666108	120666280	Merged-chr6-120666194-2
chr7	92806894	92807066	Merged-chr7-92806980-2
chr2	152804411	152804583	Merged-chr2-152804497-2
chr13	20600355	20600527	Merged-chr13-20600441-2
chr11	65713012	65713184	Merged-chr11-65713098-1
chr4	5690538	5690710	Merged-chr4-5690624-2
chr13	56582209	56582381	Merged-chr13-56582295-2
chr19	56874265	56874437	Merged-chr19-56874351-2
chr17	28226151	28226323	Merged-chr17-28226237-1
chr6	118066580	118066752	Merged-chr6-118066666-2
chr11	67081253	67081425	Merged-chr11-67081339-1
chr1	134063303	134063475	Merged-chr1-134063389-2
chr4	126248658	126248830	Merged-chr4-126248744-1
chr1	93668823	93668995	Merged-chr1-93668909-2
chr1	153641579	153641751	Merged-chr1-153641665-2
chr1	7313593	7313765	Merged-chr1-7313679-2
chr8	8612149	8612321	Merged-chr8-8612235-2
chr12	3806293	3806465	Merged-chr12-3806379-1
chr4	53789491	53789663	Merged-chr4-53789577-2
chr6	83421956	83422128	Merged-chr6-83422042-2
chr8	114314971	114315143	Merged-chr8-114315057-1
chr18	18058726	18058898	Merged-chr18-18058812-2
chr10	8297357	8297529	Merged-chr10-8297443-2
chr1	59697930	59698102	Merged-chr1-59698016-2
chr10	8287436	8287608	Merged-chr10-8287522-2
chr9	120732713	120732885	Merged-chr9-120732799-1
chr9	65109518	65109690	Merged-chr9-65109604-2
chr3	21935857	21936029	Merged-chr3-21935943-1
chr10	40258502	40258674	Merged-chr10-40258588-1
chr5	105415913	105416085	Merged-chr5-105415999-2
chr3	90224487	90224659	Merged-chr3-90224573-2
chr13	95018080	95018252	Merged-chr13-95018166-2
chr9	111487276	111487448	Merged-chr9-111487362-1
chr4	45490064	45490236	Merged-chr4-45490150-2
chr5	115490146	115490318	Merged-chr5-115490232-1
chr15	103215279	103215451	Merged-chr15-103215365-2
chr18	33950569	33950741	Merged-chr18-33950655-2
chr16	9132846	9133018	Merged-chr16-9132932-2
chr8	123515339	123515511	Merged-chr8-123515425-2
chr9	121371517	121371689	Merged-chr9-121371603-2
chr6	97517815	97517987	Merged-chr6-97517901-2
chr1	136707352	136707524	Merged-chr1-136707438-2
chr7	64872779	64872951	Merged-chr7-64872865-2
chr4	153806297	153806469	Merged-chr4-153806383-1
chr18	5163333	5163505	Merged-chr18-5163419-2
chr19	43675566	43675738	Merged-chr19-43675652-1
chr10	59879803	59879975	Merged-chr10-59879889-2
chr13	66715878	66716050	Merged-chr13-66715964-1
chr6	113852466	113852638	Merged-chr6-113852552-1
chr11	81616548	81616720	Merged-chr11-81616634-2
chr9	107709914	107710086	Merged-chr9-107710000-2
chr5	108629512	108629684	Merged-chr5-108629598-2
chr15	39198193	39198365	Merged-chr15-39198279-2
chr19	48807439	48807611	Merged-chr19-48807525-1
chr11	61529310	61529482	Merged-chr11-61529396-2
chr1	153677695	153677867	Merged-chr1-153677781-2
chr16	8470599	8470771	Merged-chr16-8470685-2
chr6	122342199	122342371	Merged-chr6-122342285-2
chr8	122848271	122848443	Merged-chr8-122848357-2
chr5	77265709	77265881	Merged-chr5-77265795-1
chr13	46418254	46418426	Merged-chr13-46418340-2
chr12	100268204	100268376	Merged-chr12-100268290-1
chr11	75165447	75165619	Merged-chr11-75165533-2
chr9	76565749	76565921	Merged-chr9-76565835-1
chr10	67549537	67549709	Merged-chr10-67549623-2
chr2	68364226	68364398	Merged-chr2-68364312-2
chr1	80403548	80403720	Merged-chr1-80403634-1
chr1	36061238	36061410	Merged-chr1-36061324-2
chr11	77462500	77462672	Merged-chr11-77462586-1
chr10	118121996	118122168	Merged-chr10-118122082-2
chr18	9865794	9865966	Merged-chr18-9865880-1
chr4	33198205	33198377	Merged-chr4-33198291-2
chr12	12904766	12904938	Merged-chr12-12904852-1
chr11	55810826	55810998	Merged-chr11-55810912-1
chr11	117934406	117934578	Merged-chr11-117934492-1
chr11	97280701	97280873	Merged-chr11-97280787-1
chr7	3423443	3423615	Merged-chr7-3423529-2
chr10	85539504	85539676	Merged-chr10-85539590-2
chr13	100616686	100616858	Merged-chr13-100616772-2
chr6	125161593	125161765	Merged-chr6-125161679-1
chr1	182408735	182408907	Merged-chr1-182408821-2
chr5	146227599	146227771	Merged-chr5-146227685-1
chr11	88139498	88139670	Merged-chr11-88139584-1
chr3	83129740	83129912	Merged-chr3-83129826-1
chr5	123150192	123150364	Merged-chr5-123150278-2
chr9	75393373	75393545	Merged-chr9-75393459-1
chrX	93089090	93089262	Merged-chrX-93089176-2
chr7	62419359	62419531	Merged-chr7-62419445-2
chr10	122033378	122033550	Merged-chr10-122033464-2
chr6	29673135	29673307	Merged-chr6-29673221-1
chr9	21337673	21337845	Merged-chr9-21337759-1
chr5	137934220	137934392	Merged-chr5-137934306-2
chr1	9747815	9747987	Merged-chr1-9747901-1
chr8	109957292	109957464	Merged-chr8-109957378-1
chr16	94972543	94972715	Merged-chr16-94972629-1
chr2	6547270	6547442	Merged-chr2-6547356-1
chr11	114795348	114795520	Merged-chr11-114795434-2
chr11	88974000	88974172	Merged-chr11-88974086-2
chr9	94659719	94659891	Merged-chr9-94659805-2
chr7	37290059	37290231	Merged-chr7-37290145-2
chr4	105223981	105224153	Merged-chr4-105224067-2
chr5	38656379	38656551	Merged-chr5-38656465-2
chr7	4445515	4445687	Merged-chr7-4445601-2
chr17	16218708	16218880	Merged-chr17-16218794-2
chr9	119149780	119149952	Merged-chr9-119149866-1
chr15	77863196	77863368	Merged-chr15-77863282-2
chr12	54834983	54835155	Merged-chr12-54835069-2
chr9	123461911	123462083	Merged-chr9-123461997-1
chr11	74619195	74619367	Merged-chr11-74619281-1
chr13	17695526	17695698	Merged-chr13-17695612-1
chr5	138155470	138155642	Merged-chr5-138155556-1
chr16	32516447	32516619	Merged-chr16-32516533-2
chr8	84223375	84223547	Merged-chr8-84223461-2
chr7	66292942	66293114	Merged-chr7-66293028-2
chr4	121241434	121241606	Merged-chr4-121241520-2
chr2	167689757	167689929	Merged-chr2-167689843-2
chr10	94515161	94515333	Merged-chr10-94515247-2
chr9	36917047	36917219	Merged-chr9-36917133-1
chr6	135040405	135040577	Merged-chr6-135040491-2
chr5	23432810	23432982	Merged-chr5-23432896-1
chr11	86051540	86051712	Merged-chr11-86051626-2
chr1	134061209	134061381	Merged-chr1-134061295-2
chr2	30942878	30943050	Merged-chr2-30942964-2
chr18	83840954	83841126	Merged-chr18-83841040-2
chr7	16944438	16944610	Merged-chr7-16944524-2
chr3	121736549	121736721	Merged-chr3-121736635-2
chr17	45602101	45602273	Merged-chr17-45602187-2
chr17	9917156	9917328	Merged-chr17-9917242-2
chr11	52360705	52360877	Merged-chr11-52360791-1
chr11	101984243	101984415	Merged-chr11-101984329-2
chr11	52764484	52764656	Merged-chr11-52764570-2
chr14	70659012	70659184	Merged-chr14-70659098-1
chr8	79079353	79079525	Merged-chr8-79079439-1
chr7	107708597	107708769	Merged-chr7-107708683-2
chr19	46518644	46518816	Merged-chr19-46518730-2
chr3	65958003	65958175	Merged-chr3-65958089-2
chr5	12847185	12847357	Merged-chr5-12847271-2
chr11	98964720	98964892	Merged-chr11-98964806-2
chr16	87435436	87435608	Merged-chr16-87435522-2
chr10	110854895	110855067	Merged-chr10-110854981-2
chr2	154427896	154428068	Merged-chr2-154427982-2
chr4	142234963	142235135	Merged-chr4-142235049-2
chr9	74366097	74366269	Merged-chr9-74366183-2
chr11	96929271	96929443	Merged-chr11-96929357-2
chr7	133114854	133115026	Merged-chr7-133114940-2
chr19	42170726	42170898	Merged-chr19-42170812-1
chr14	45507167	45507339	Merged-chr14-45507253-1
chr3	144643668	144643840	Merged-chr3-144643754-2
chr18	35815583	35815755	Merged-chr18-35815669-2
chr17	13552121	13552293	Merged-chr17-13552207-1
chr4	118543943	118544115	Merged-chr4-118544029-2
chr8	78147500	78147672	Merged-chr8-78147586-2
chr2	125134203	125134375	Merged-chr2-125134289-2
chr13	99609433	99609605	Merged-chr13-99609519-1
chr19	47328011	47328183	Merged-chr19-47328097-2
chr4	145556768	145556940	Merged-chr4-145556854-2
chr1	63114221	63114393	Merged-chr1-63114307-2
chr8	46584466	46584638	Merged-chr8-46584552-2
chrX	83486880	83487052	Merged-chrX-83486966-2
chr9	61293295	61293467	Merged-chr9-61293381-2
chr11	119991459	119991631	Merged-chr11-119991545-2
chr4	125651921	125652093	Merged-chr4-125652007-2
chr6	142511589	142511761	Merged-chr6-142511675-2
chr11	70764329	70764501	Merged-chr11-70764415-2
chr1	75344749	75344921	Merged-chr1-75344835-2
chr18	37826290	37826462	Merged-chr18-37826376-2
chr7	100009774	100009946	Merged-chr7-100009860-2
chr3	129918512	129918684	Merged-chr3-129918598-2
chr7	100663307	100663479	Merged-chr7-100663393-2
chr8	120528358	120528530	Merged-chr8-120528444-2
chr8	28594733	28594905	Merged-chr8-28594819-2
chr2	163481725	163481897	Merged-chr2-163481811-2
chr15	78928121	78928293	Merged-chr15-78928207-2
chr18	82477337	82477509	Merged-chr18-82477423-2
chr11	97661708	97661880	Merged-chr11-97661794-2
chr17	67996247	67996419	Merged-chr17-67996333-2
chr11	68555978	68556150	Merged-chr11-68556064-2
chr9	50617048	50617220	Merged-chr9-50617134-2
chr8	117802408	117802580	Merged-chr8-117802494-1
chr12	25702322	25702494	Merged-chr12-25702408-2
chr3	7805220	7805392	Merged-chr3-7805306-1
chr1	177555744	177555916	Merged-chr1-177555830-1
chr17	32162663	32162835	Merged-chr17-32162749-2
chr6	83137630	83137802	Merged-chr6-83137716-1
chr11	9131939	9132111	Merged-chr11-9132025-2
chr16	14004316	14004488	Merged-chr16-14004402-2
chr5	65467006	65467178	Merged-chr5-65467092-1
chr11	26371953	26372125	Merged-chr11-26372039-2
chr16	97286835	97287007	Merged-chr16-97286921-1
chr4	62262324	62262496	Merged-chr4-62262410-2
chr16	35981652	35981824	Merged-chr16-35981738-1
chr3	34648923	34649095	Merged-chr3-34649009-1
chr13	112001256	112001428	Merged-chr13-112001342-2
chr5	140208814	140208986	Merged-chr5-140208900-1
chr19	47019436	47019608	Merged-chr19-47019522-2
chr14	68934937	68935109	Merged-chr14-68935023-2
chr7	52164588	52164760	Merged-chr7-52164674-2
chr11	11855124	11855296	Merged-chr11-11855210-2
chr2	71189050	71189222	Merged-chr2-71189136-2
chr18	42740726	42740898	Merged-chr18-42740812-2
chr10	77197481	77197653	Merged-chr10-77197567-2
chr3	8850899	8851071	Merged-chr3-8850985-2
chr4	101550667	101550839	Merged-chr4-101550753-1
chr2	60688975	60689147	Merged-chr2-60689061-1
chr11	98446840	98447012	Merged-chr11-98446926-2
chr17	35059697	35059869	Merged-chr17-35059783-2
chr7	116530896	116531068	Merged-chr7-116530982-1
chr6	4684970	4685142	Merged-chr6-4685056-1
chr7	120327398	120327570	Merged-chr7-120327484-2
chr13	115089285	115089457	Merged-chr13-115089371-2
chr5	142974719	142974891	Merged-chr5-142974805-1
chr9	57148346	57148518	Merged-chr9-57148432-2
chr6	125442675	125442847	Merged-chr6-125442761-2
chr5	128439898	128440070	Merged-chr5-128439984-2
chr8	120535666	120535838	Merged-chr8-120535752-2
chr6	88198488	88198660	Merged-chr6-88198574-2
chr10	128590306	128590478	Merged-chr10-128590392-1
chr12	26315106	26315278	Merged-chr12-26315192-2
chr11	79593625	79593797	Merged-chr11-79593711-2
chr1	36251556	36251728	Merged-chr1-36251642-2
chr5	128734048	128734220	Merged-chr5-128734134-1
chr3	33991000	33991172	Merged-chr3-33991086-1
chr2	38976486	38976658	Merged-chr2-38976572-2
chr12	100998085	100998257	Merged-chr12-100998171-2
chr3	152944818	152944990	Merged-chr3-152944904-2
chr18	65925223	65925395	Merged-chr18-65925309-2
chr6	88976618	88976790	Merged-chr6-88976704-2
chr18	38014298	38014470	Merged-chr18-38014384-1
chr10	14450195	14450367	Merged-chr10-14450281-1
chr9	106646005	106646177	Merged-chr9-106646091-2
chr10	99132311	99132483	Merged-chr10-99132397-2
chr7	128080094	128080266	Merged-chr7-128080180-2
chr18	14512244	14512416	Merged-chr18-14512330-2
chr14	122267650	122267822	Merged-chr14-122267736-2
chr1	87327433	87327605	Merged-chr1-87327519-2
chr1	182019758	182019930	Merged-chr1-182019844-2
chr14	24253965	24254137	Merged-chr14-24254051-2
chr11	117403936	117404108	Merged-chr11-117404022-2
chr8	84194428	84194600	Merged-chr8-84194514-2
chr12	84114531	84114703	Merged-chr12-84114617-2
chr9	107279676	107279848	Merged-chr9-107279762-2
chr4	118019392	118019564	Merged-chr4-118019478-1
chr8	33974135	33974307	Merged-chr8-33974221-1
chr2	105370252	105370424	Merged-chr2-105370338-2
chr12	25098705	25098877	Merged-chr12-25098791-2
chr11	95990995	95991167	Merged-chr11-95991081-1
chr5	23675749	23675921	Merged-chr5-23675835-1
chr13	74929150	74929322	Merged-chr13-74929236-1
chrY	90734097	90734269	Merged-chrY-90734183-1
chr15	98114598	98114770	Merged-chr15-98114684-2
chr13	3642126	3642298	Merged-chr13-3642212-2
chr7	79428295	79428467	Merged-chr7-79428381-2
chr5	140583494	140583666	Merged-chr5-140583580-2
chr6	37658137	37658309	Merged-chr6-37658223-2
chr10	58223910	58224082	Merged-chr10-58223996-1
chr2	179193780	179193952	Merged-chr2-179193866-1
chr6	89288258	89288430	Merged-chr6-89288344-2
chr19	7057736	7057908	Merged-chr19-7057822-2
chr8	81353501	81353673	Merged-chr8-81353587-2
chr14	73325157	73325329	Merged-chr14-73325243-2
chr10	126979353	126979525	Merged-chr10-126979439-1
chr11	117438450	117438622	Merged-chr11-117438536-2
chr9	113793195	113793367	Merged-chr9-113793281-2
chr17	9606923	9607095	Merged-chr17-9607009-2
chrX	151653869	151654041	Merged-chrX-151653955-1
chr2	103302868	103303040	Merged-chr2-103302954-2
chr6	28982517	28982689	Merged-chr6-28982603-1
chr13	98890216	98890388	Merged-chr13-98890302-2
chr11	44333556	44333728	Merged-chr11-44333642-1
chr5	130038118	130038290	Merged-chr5-130038204-2
chr2	167540238	167540410	Merged-chr2-167540324-2
chr11	101334603	101334775	Merged-chr11-101334689-2
chr2	152816420	152816592	Merged-chr2-152816506-2
chr10	76067760	76067932	Merged-chr10-76067846-2
chr13	51920631	51920803	Merged-chr13-51920717-2
chr9	58060983	58061155	Merged-chr9-58061069-1
chr4	99766818	99766990	Merged-chr4-99766904-2
chr7	16004556	16004728	Merged-chr7-16004642-2
chr17	51839516	51839688	Merged-chr17-51839602-1
chr11	120658918	120659090	Merged-chr11-120659004-2
chr6	5027262	5027434	Merged-chr6-5027348-2
chr4	44028381	44028553	Merged-chr4-44028467-2
chr7	27257876	27258048	Merged-chr7-27257962-2
chr9	20831000	20831172	Merged-chr9-20831086-2
chr1	36580159	36580331	Merged-chr1-36580245-2
chr5	125389429	125389601	Merged-chr5-125389515-2
chr9	12930376	12930548	Merged-chr9-12930462-2
chr18	20801995	20802167	Merged-chr18-20802081-1
chr11	88758495	88758667	Merged-chr11-88758581-2
chr10	130259504	130259676	Merged-chr10-130259590-2
chr4	147432137	147432309	Merged-chr4-147432223-1
chr7	130236973	130237145	Merged-chr7-130237059-2
chr11	79327079	79327251	Merged-chr11-79327165-1
chr11	113232113	113232285	Merged-chr11-113232199-1
chr3	117010299	117010471	Merged-chr3-117010385-2
chrY	90810727	90810899	Merged-chrY-90810813-1
chr11	76287363	76287535	Merged-chr11-76287449-2
chr17	15371964	15372136	Merged-chr17-15372050-2
chr10	91177224	91177396	Merged-chr10-91177310-2
chr17	23603586	23603758	Merged-chr17-23603672-1
chr12	44344219	44344391	Merged-chr12-44344305-2
chr2	58665492	58665664	Merged-chr2-58665578-2
chr2	84837203	84837375	Merged-chr2-84837289-2
chr2	92947971	92948143	Merged-chr2-92948057-2
chr7	81212287	81212459	Merged-chr7-81212373-2
chr15	44716079	44716251	Merged-chr15-44716165-2
chr12	86466306	86466478	Merged-chr12-86466392-2
chr19	44930789	44930961	Merged-chr19-44930875-2
chr13	31292673	31292845	Merged-chr13-31292759-2
chr14	34303315	34303487	Merged-chr14-34303401-2
chr10	117571631	117571803	Merged-chr10-117571717-1
chr3	95164100	95164272	Merged-chr3-95164186-1
chr6	140622709	140622881	Merged-chr6-140622795-2
chr9	46980212	46980384	Merged-chr9-46980298-1
chr10	58231847	58232019	Merged-chr10-58231933-1
chr8	80872862	80873034	Merged-chr8-80872948-2
chr5	72444012	72444184	Merged-chr5-72444098-1
chr6	88044777	88044949	Merged-chr6-88044863-2
chr11	88689785	88689957	Merged-chr11-88689871-2
chr11	83233703	83233875	Merged-chr11-83233789-2
chr2	178603493	178603665	Merged-chr2-178603579-2
chr16	18724803	18724975	Merged-chr16-18724889-2
chr16	88701055	88701227	Merged-chr16-88701141-2
chr11	13006587	13006759	Merged-chr11-13006673-2
chr10	36484726	36484898	Merged-chr10-36484812-2
chr13	82063988	82064160	Merged-chr13-82064074-2
chr12	81776282	81776454	Merged-chr12-81776368-1
chr10	37102784	37102956	Merged-chr10-37102870-1
chr2	104572810	104572982	Merged-chr2-104572896-2
chr16	9280943	9281115	Merged-chr16-9281029-2
chr13	107678914	107679086	Merged-chr13-107679000-2
chr13	44751800	44751972	Merged-chr13-44751886-1
chr1	11416518	11416690	Merged-chr1-11416604-2
chr8	45999151	45999323	Merged-chr8-45999237-1
chr17	29056808	29056980	Merged-chr17-29056894-2
chr7	127104579	127104751	Merged-chr7-127104665-1
chr18	6308307	6308479	Merged-chr18-6308393-2
chr6	55108459	55108631	Merged-chr6-55108545-1
chr1	78181911	78182083	Merged-chr1-78181997-1
chr12	111664461	111664633	Merged-chr12-111664547-2
chr17	31570396	31570568	Merged-chr17-31570482-1
chr8	86425483	86425655	Merged-chr8-86425569-1
chr11	53749749	53749921	Merged-chr11-53749835-2
chr13	112375830	112376002	Merged-chr13-112375916-2

## Sheet: MYOD1_closed
Chr	St	End	PeakID
chr5	28169048	28169220	Merged-chr5-28169134-2
chr10	85507477	85507649	Merged-chr10-85507563-2
chr4	148122508	148122680	Merged-chr4-148122594-2
chr5	143288444	143288616	Merged-chr5-143288530-1
chr4	107366558	107366730	Merged-chr4-107366644-2
chr2	30779837	30780009	Merged-chr2-30779923-2
chr10	127084134	127084306	Merged-chr10-127084220-2
chr7	36792144	36792316	Merged-chr7-36792230-2
chr19	5810688	5810860	Merged-chr19-5810774-2
chr5	37372907	37373079	Merged-chr5-37372993-2
chr4	147416442	147416614	Merged-chr4-147416528-1
chr5	38765429	38765601	Merged-chr5-38765515-1
chr7	144892082	144892254	Merged-chr7-144892168-2
chr8	70429160	70429332	Merged-chr8-70429246-2
chr4	11053849	11054021	Merged-chr4-11053935-2
chr13	12911685	12911857	Merged-chr13-12911771-1
chr6	54409288	54409460	Merged-chr6-54409374-1
chr1	35995870	35996042	Merged-chr1-35995956-2
chr1	27108865	27109037	Merged-chr1-27108951-2
chr11	108119913	108120085	Merged-chr11-108119999-2
chr6	100264258	100264430	Merged-chr6-100264344-2
chr19	22887122	22887294	Merged-chr19-22887208-2
chr15	75658649	75658821	Merged-chr15-75658735-2
chr10	84527585	84527757	Merged-chr10-84527671-2
chr15	98831878	98832050	Merged-chr15-98831964-1
chr10	69208333	69208505	Merged-chr10-69208419-1
chr5	139093668	139093840	Merged-chr5-139093754-2
chr5	52424904	52425076	Merged-chr5-52424990-2
chr11	51659418	51659590	Merged-chr11-51659504-2
chr8	123111738	123111910	Merged-chr8-123111824-2
chr14	102072314	102072486	Merged-chr14-102072400-2
chr5	140882410	140882582	Merged-chr5-140882496-1
chr17	47291544	47291716	Merged-chr17-47291630-1
chr11	99680555	99680727	Merged-chr11-99680641-2
chr2	26342307	26342479	Merged-chr2-26342393-1
chr18	39321989	39322161	Merged-chr18-39322075-1
chr11	59640321	59640493	Merged-chr11-59640407-2
chr11	114175824	114175996	Merged-chr11-114175910-2
chr2	16683022	16683194	Merged-chr2-16683108-2
chr4	130915721	130915893	Merged-chr4-130915807-2
chr2	154343591	154343763	Merged-chr2-154343677-1
chr8	26892029	26892201	Merged-chr8-26892115-1
chr9	31084770	31084942	Merged-chr9-31084856-1
chr9	65544914	65545086	Merged-chr9-65545000-2
chr5	35186272	35186444	Merged-chr5-35186358-2
chr17	47757282	47757454	Merged-chr17-47757368-2
chr8	111730796	111730968	Merged-chr8-111730882-2
chr12	32500191	32500363	Merged-chr12-32500277-2
chr11	99583369	99583541	Merged-chr11-99583455-2
chr1	173965218	173965390	Merged-chr1-173965304-2
chr3	9540526	9540698	Merged-chr3-9540612-2
chr10	77836012	77836184	Merged-chr10-77836098-2
chr2	75750478	75750650	Merged-chr2-75750564-2
chr13	57947583	57947755	Merged-chr13-57947669-2
chr5	114856156	114856328	Merged-chr5-114856242-1
chr7	19786143	19786315	Merged-chr7-19786229-1
chr9	108050594	108050766	Merged-chr9-108050680-1
chr1	125389788	125389960	Merged-chr1-125389874-2
chr8	13916528	13916700	Merged-chr8-13916614-2
chr7	47027050	47027222	Merged-chr7-47027136-2
chr6	142838229	142838401	Merged-chr6-142838315-2
chr2	179391972	179392144	Merged-chr2-179392058-2
chr10	83168849	83169021	Merged-chr10-83168935-1
chr16	50736239	50736411	Merged-chr16-50736325-2
chr12	103368832	103369004	Merged-chr12-103368918-2
chr3	104438891	104439063	Merged-chr3-104438977-2
chr3	101831637	101831809	Merged-chr3-101831723-2
chr10	91678725	91678897	Merged-chr10-91678811-2
chr13	34344037	34344209	Merged-chr13-34344123-1
chr1	85624924	85625096	Merged-chr1-85625010-1
chr1	132890792	132890964	Merged-chr1-132890878-2
chr8	122698477	122698649	Merged-chr8-122698563-2
chr10	44730795	44730967	Merged-chr10-44730881-2
chr19	4057695	4057867	Merged-chr19-4057781-1
chr13	112868482	112868654	Merged-chr13-112868568-1
chr4	136044278	136044450	Merged-chr4-136044364-2
chr12	105550418	105550590	Merged-chr12-105550504-2
chr14	47629430	47629602	Merged-chr14-47629516-1
chr1	189991179	189991351	Merged-chr1-189991265-2
chr11	63160825	63160997	Merged-chr11-63160911-1
chr4	11647790	11647962	Merged-chr4-11647876-1
chr9	64497352	64497524	Merged-chr9-64497438-2
chr12	108848097	108848269	Merged-chr12-108848183-2
chr12	54326685	54326857	Merged-chr12-54326771-2
chr2	31869794	31869966	Merged-chr2-31869880-2
chr17	30721686	30721858	Merged-chr17-30721772-1
chr8	93929279	93929451	Merged-chr8-93929365-1
chr2	157837605	157837777	Merged-chr2-157837691-2
chr4	139688723	139688895	Merged-chr4-139688809-2
chr15	37514687	37514859	Merged-chr15-37514773-2
chr16	90082139	90082311	Merged-chr16-90082225-2
chr14	120263003	120263175	Merged-chr14-120263089-2
chr6	100320695	100320867	Merged-chr6-100320781-2
chr6	125413035	125413207	Merged-chr6-125413121-2
chr2	167074722	167074894	Merged-chr2-167074808-2
chr6	146099361	146099533	Merged-chr6-146099447-1
chr7	43777898	43778070	Merged-chr7-43777984-2
chr18	69204207	69204379	Merged-chr18-69204293-1
chr5	104978979	104979151	Merged-chr5-104979065-2
chr17	10330393	10330565	Merged-chr17-10330479-2
chr11	99699531	99699703	Merged-chr11-99699617-2
chr12	54404269	54404441	Merged-chr12-54404355-2
chr15	99890907	99891079	Merged-chr15-99890993-2
chr7	142280239	142280411	Merged-chr7-142280325-2
chr2	163449376	163449548	Merged-chr2-163449462-2
chr10	92719964	92720136	Merged-chr10-92720050-2
chr6	118431622	118431794	Merged-chr6-118431708-2
chr6	32770018	32770190	Merged-chr6-32770104-2
chr10	41273140	41273312	Merged-chr10-41273226-1
chr15	79349393	79349565	Merged-chr15-79349479-2
chr8	124262199	124262371	Merged-chr8-124262285-2
chr17	25656230	25656402	Merged-chr17-25656316-2
chr12	112325751	112325923	Merged-chr12-112325837-2
chr14	55575563	55575735	Merged-chr14-55575649-1
chr5	143654860	143655032	Merged-chr5-143654946-1
chr2	177094149	177094321	Merged-chr2-177094235-2
chr16	10651981	10652153	Merged-chr16-10652067-2
chrX	96120086	96120258	Merged-chrX-96120172-2
chr11	99846888	99847060	Merged-chr11-99846974-2
chr2	168023732	168023904	Merged-chr2-168023818-2
chr6	36787700	36787872	Merged-chr6-36787786-2
chr13	41334005	41334177	Merged-chr13-41334091-2
chr10	77814732	77814904	Merged-chr10-77814818-2
chr13	51510682	51510854	Merged-chr13-51510768-1
chr2	171844876	171845048	Merged-chr2-171844962-1
chr2	6969781	6969953	Merged-chr2-6969867-1
chr4	140197173	140197345	Merged-chr4-140197259-1
chr8	105451236	105451408	Merged-chr8-105451322-1
chr4	129578561	129578733	Merged-chr4-129578647-1
chr7	45437639	45437811	Merged-chr7-45437725-1
chr11	99758947	99759119	Merged-chr11-99759033-2
chr11	69362100	69362272	Merged-chr11-69362186-2
chr5	28093283	28093455	Merged-chr5-28093369-2
chr1	191268892	191269064	Merged-chr1-191268978-2
chr2	130875226	130875398	Merged-chr2-130875312-2
chr2	167109620	167109792	Merged-chr2-167109706-2
chr4	56942869	56943041	Merged-chr4-56942955-2
chr11	9784641	9784813	Merged-chr11-9784727-2
chr16	57194728	57194900	Merged-chr16-57194814-2
chr4	146741835	146742007	Merged-chr4-146741921-2
chr4	150263847	150264019	Merged-chr4-150263933-2
chr4	48036048	48036220	Merged-chr4-48036134-2
chr4	107713024	107713196	Merged-chr4-107713110-2
chr15	76012885	76013057	Merged-chr15-76012971-2
chr15	83673138	83673310	Merged-chr15-83673224-2
chr15	58017943	58018115	Merged-chr15-58018029-2
chr10	111696885	111697057	Merged-chr10-111696971-2
chr7	19084437	19084609	Merged-chr7-19084523-2
chr3	27440934	27441106	Merged-chr3-27441020-2
chr3	62536195	62536367	Merged-chr3-62536281-2
chr3	131591704	131591876	Merged-chr3-131591790-2
chr5	139368752	139368924	Merged-chr5-139368838-2
chr18	82934207	82934379	Merged-chr18-82934293-2
chr18	68659959	68660131	Merged-chr18-68660045-2
chr9	61084994	61085166	Merged-chr9-61085080-2
chr9	51662980	51663152	Merged-chr9-51663066-2
chr9	72205896	72206068	Merged-chr9-72205982-2
chr14	118872230	118872402	Merged-chr14-118872316-2
chr14	24601338	24601510	Merged-chr14-24601424-2
chr10	77690514	77690686	Merged-chr10-77690600-2
chr5	114166317	114166489	Merged-chr5-114166403-2
chr7	142229432	142229604	Merged-chr7-142229518-2
chr6	39494237	39494409	Merged-chr6-39494323-2
chr2	180545565	180545737	Merged-chr2-180545651-2
chr17	27101835	27102007	Merged-chr17-27101921-2
chr15	98516077	98516249	Merged-chr15-98516163-1
chr13	49382924	49383096	Merged-chr13-49383010-2
chr9	95264667	95264839	Merged-chr9-95264753-2
chr9	65201659	65201831	Merged-chr9-65201745-1
chr15	75802859	75803031	Merged-chr15-75802945-1
chr10	81242130	81242302	Merged-chr10-81242216-1
chr7	141901836	141902008	Merged-chr7-141901922-1
chr6	84274530	84274702	Merged-chr6-84274616-1
chr11	99614355	99614527	Merged-chr11-99614441-2
chr11	60722764	60722936	Merged-chr11-60722850-2
chr11	117986108	117986280	Merged-chr11-117986194-2
chr13	116285283	116285455	Merged-chr13-116285369-2
chr9	62820943	62821115	Merged-chr9-62821029-2
chr15	101229287	101229459	Merged-chr15-101229373-2
chr5	100751754	100751926	Merged-chr5-100751840-2
chr11	60319710	60319882	Merged-chr11-60319796-2
chr4	107429458	107429630	Merged-chr4-107429544-2
chr11	80411145	80411317	Merged-chr11-80411231-2
chr6	127969771	127969943	Merged-chr6-127969857-2
chr6	83510183	83510355	Merged-chr6-83510269-2
chr6	96786404	96786576	Merged-chr6-96786490-2
chr2	164655788	164655960	Merged-chr2-164655874-2
chr16	30726143	30726315	Merged-chr16-30726229-2
chr12	83608557	83608729	Merged-chr12-83608643-2
chr4	126115999	126116171	Merged-chr4-126116085-2
chr15	84411083	84411255	Merged-chr15-84411169-2
chr15	12224355	12224527	Merged-chr15-12224441-2
chr10	20297566	20297738	Merged-chr10-20297652-2
chr1	16436568	16436740	Merged-chr1-16436654-2
chr7	134208014	134208186	Merged-chr7-134208100-2
chr18	25493476	25493648	Merged-chr18-25493562-2
chr14	47356713	47356885	Merged-chr14-47356799-2
chr10	27807883	27808055	Merged-chr10-27807969-2
chr7	29382015	29382187	Merged-chr7-29382101-2
chr7	64363929	64364101	Merged-chr7-64364015-2
chr6	94651674	94651846	Merged-chr6-94651760-2
chr13	48944661	48944833	Merged-chr13-48944747-2
chr13	35812149	35812321	Merged-chr13-35812235-2
chr12	78351010	78351182	Merged-chr12-78351096-1
chr15	100965084	100965256	Merged-chr15-100965170-2
chr7	139851709	139851881	Merged-chr7-139851795-2
chr11	115798496	115798668	Merged-chr11-115798582-2
chr4	140171483	140171655	Merged-chr4-140171569-2
chr14	19701673	19701845	Merged-chr14-19701759-2
chr19	42000524	42000696	Merged-chr19-42000610-2
chr11	19631148	19631320	Merged-chr11-19631234-2
chr10	121843333	121843505	Merged-chr10-121843419-2
chr7	77234574	77234746	Merged-chr7-77234660-2
chr5	123766516	123766688	Merged-chr5-123766602-2
chr5	131764155	131764327	Merged-chr5-131764241-2
chr8	12127820	12127992	Merged-chr8-12127906-1
chr2	29261272	29261444	Merged-chr2-29261358-2
chr12	86525364	86525536	Merged-chr12-86525450-1
chr19	56236074	56236246	Merged-chr19-56236160-2
chr3	97026328	97026500	Merged-chr3-97026414-2
chr17	7187153	7187325	Merged-chr17-7187239-2
chr9	108603993	108604165	Merged-chr9-108604079-1
chr1	89998788	89998960	Merged-chr1-89998874-2
chr4	140273232	140273404	Merged-chr4-140273318-2
chr16	90553297	90553469	Merged-chr16-90553383-2
chr11	99591109	99591281	Merged-chr11-99591195-2
chr18	81669258	81669430	Merged-chr18-81669344-2
chr15	76350349	76350521	Merged-chr15-76350435-1
chr2	35565535	35565707	Merged-chr2-35565621-1
chr11	104528244	104528416	Merged-chr11-104528330-1
chr11	29774405	29774577	Merged-chr11-29774491-2
chr11	119585921	119586093	Merged-chr11-119586007-2
chr9	13957252	13957424	Merged-chr9-13957338-2
chr5	107386573	107386745	Merged-chr5-107386659-2
chr11	120985674	120985846	Merged-chr11-120985760-2
chr8	123357420	123357592	Merged-chr8-123357506-2
chr16	74368543	74368715	Merged-chr16-74368629-2
chr12	111021230	111021402	Merged-chr12-111021316-2
chr12	28507194	28507366	Merged-chr12-28507280-2
chr10	41404353	41404525	Merged-chr10-41404439-2
chr13	100990751	100990923	Merged-chr13-100990837-2
chr7	64235404	64235576	Merged-chr7-64235490-2
chr5	36280987	36281159	Merged-chr5-36281073-2
chr5	115726692	115726864	Merged-chr5-115726778-2
chr7	135926498	135926670	Merged-chr7-135926584-2
chr18	64405607	64405779	Merged-chr18-64405693-2
chr7	128058660	128058832	Merged-chr7-128058746-2
chr6	86523786	86523958	Merged-chr6-86523872-2
chr2	31957338	31957510	Merged-chr2-31957424-2
chr17	28356673	28356845	Merged-chr17-28356759-2
chr11	106869012	106869184	Merged-chr11-106869098-1
chr1	86360958	86361130	Merged-chr1-86361044-2
chr2	34073342	34073514	Merged-chr2-34073428-1
chr2	77506023	77506195	Merged-chr2-77506109-1
chr6	15716343	15716515	Merged-chr6-15716429-1
chr8	22897487	22897659	Merged-chr8-22897573-1
chr15	100664828	100665000	Merged-chr15-100664914-2
chr11	96900001	96900173	Merged-chr11-96900087-2
chr2	29755789	29755961	Merged-chr2-29755875-2
chr8	13503436	13503608	Merged-chr8-13503522-2
chr4	154183270	154183442	Merged-chr4-154183356-2
chr15	98851606	98851778	Merged-chr15-98851692-2
chr7	25170961	25171133	Merged-chr7-25171047-2
chr1	171333301	171333473	Merged-chr1-171333387-2
chr14	31571511	31571683	Merged-chr14-31571597-2
chr17	87919215	87919387	Merged-chr17-87919301-2
chr17	7271629	7271801	Merged-chr17-7271715-2
chr11	28948421	28948593	Merged-chr11-28948507-1
chr19	44258456	44258628	Merged-chr19-44258542-1
chr1	181951586	181951758	Merged-chr1-181951672-1
chr1	182116152	182116324	Merged-chr1-182116238-2
chr9	106646749	106646921	Merged-chr9-106646835-2
chr16	18773994	18774166	Merged-chr16-18774080-1
chr4	151295611	151295783	Merged-chr4-151295697-1
chr1	152203306	152203478	Merged-chr1-152203392-1
chr5	92016902	92017074	Merged-chr5-92016988-2
chr17	35440332	35440504	Merged-chr17-35440418-2
chr1	131178880	131179052	Merged-chr1-131178966-2
chr1	153184046	153184218	Merged-chr1-153184132-2
chr4	59945129	59945301	Merged-chr4-59945215-2
chr6	39464315	39464487	Merged-chr6-39464401-2
chr6	121096163	121096335	Merged-chr6-121096249-2
chr12	111531509	111531681	Merged-chr12-111531595-2
chr12	78605982	78606154	Merged-chr12-78606068-2
chr8	21848695	21848867	Merged-chr8-21848781-2
chr5	139220198	139220370	Merged-chr5-139220284-2
chr7	132431217	132431389	Merged-chr7-132431303-2
chr2	11593553	11593725	Merged-chr2-11593639-2
chr13	12851626	12851798	Merged-chr13-12851712-1
chr18	25505971	25506143	Merged-chr18-25506057-2
chr14	67019936	67020108	Merged-chr14-67020022-2
chr17	36953378	36953550	Merged-chr17-36953464-2
chr12	85456867	85457039	Merged-chr12-85456953-1
chr15	85235572	85235744	Merged-chr15-85235658-2
chr5	32612601	32612773	Merged-chr5-32612687-2
chr1	159392210	159392382	Merged-chr1-159392296-2
chr4	155785079	155785251	Merged-chr4-155785165-2
chr7	19951904	19952076	Merged-chr7-19951990-2
chr7	19800118	19800290	Merged-chr7-19800204-2
chr15	100351793	100351965	Merged-chr15-100351879-1
chr17	51803717	51803889	Merged-chr17-51803803-1
chr17	87670177	87670349	Merged-chr17-87670263-1
chr11	95315580	95315752	Merged-chr11-95315666-1
chr11	118892756	118892928	Merged-chr11-118892842-1
chr11	6177494	6177666	Merged-chr11-6177580-1
chr4	150183940	150184112	Merged-chr4-150184026-1
chr4	7856752	7856924	Merged-chr4-7856838-1
chr11	58136392	58136564	Merged-chr11-58136478-1
chr6	125124461	125124633	Merged-chr6-125124547-1
chr8	70928210	70928382	Merged-chr8-70928296-1
chr8	94148075	94148247	Merged-chr8-94148161-1
chr8	109569199	109569371	Merged-chr8-109569285-1
chr2	162139852	162140024	Merged-chr2-162139938-1
chr16	89973898	89974070	Merged-chr16-89973984-1
chr4	82238271	82238443	Merged-chr4-82238357-1
chr4	137158618	137158790	Merged-chr4-137158704-1
chr12	39865242	39865414	Merged-chr12-39865328-1
chr12	80612316	80612488	Merged-chr12-80612402-1
chr4	149602923	149603095	Merged-chr4-149603009-1
chr19	42162337	42162509	Merged-chr19-42162423-1
chr15	36507873	36508045	Merged-chr15-36507959-1
chr15	99440552	99440724	Merged-chr15-99440638-1
chr15	88949634	88949806	Merged-chr15-88949720-1
chr18	83543712	83543884	Merged-chr18-83543798-1
chr3	119113245	119113417	Merged-chr3-119113331-1
chr1	44157099	44157271	Merged-chr1-44157185-1
chr1	90156696	90156868	Merged-chr1-90156782-1
chr1	132985525	132985697	Merged-chr1-132985611-1
chr1	152299209	152299381	Merged-chr1-152299295-1
chr1	157179363	157179535	Merged-chr1-157179449-1
chr5	92687158	92687330	Merged-chr5-92687244-1
chr7	45387858	45388030	Merged-chr7-45387944-1
chr9	67421875	67422047	Merged-chr9-67421961-1
chr14	64585438	64585610	Merged-chr14-64585524-1
chr5	149422661	149422833	Merged-chr5-149422747-1
chr7	75179653	75179825	Merged-chr7-75179739-1
chr7	80523839	80524011	Merged-chr7-80523925-1
chr7	90381094	90381266	Merged-chr7-90381180-1
chr6	29879666	29879838	Merged-chr6-29879752-1
chr11	99792718	99792890	Merged-chr11-99792804-2
chr11	99879435	99879607	Merged-chr11-99879521-2
chr11	25100075	25100247	Merged-chr11-25100161-2
chr11	99873663	99873835	Merged-chr11-99873749-2
chr11	116140998	116141170	Merged-chr11-116141084-2
chr13	55936658	55936830	Merged-chr13-55936744-2
chr13	113652971	113653143	Merged-chr13-113653057-2
chr9	62675890	62676062	Merged-chr9-62675976-2
chr9	120588578	120588750	Merged-chr9-120588664-2
chr9	66869665	66869837	Merged-chr9-66869751-2
chr15	83775986	83776158	Merged-chr15-83776072-2
chr5	26413051	26413223	Merged-chr5-26413137-2
chr5	53273879	53274051	Merged-chr5-53273965-2
chr5	135970356	135970528	Merged-chr5-135970442-2
chr5	144022754	144022926	Merged-chr5-144022840-2
chr5	33514685	33514857	Merged-chr5-33514771-2
chr5	115983253	115983425	Merged-chr5-115983339-2
chr17	16902517	16902689	Merged-chr17-16902603-2
chr17	30796081	30796253	Merged-chr17-30796167-2
chr17	50116542	50116714	Merged-chr17-50116628-2
chr17	70192866	70193038	Merged-chr17-70192952-2
chr17	85045894	85046066	Merged-chr17-85045980-2
chr11	52479651	52479823	Merged-chr11-52479737-2
chr11	96509334	96509506	Merged-chr11-96509420-2
chr11	33110204	33110376	Merged-chr11-33110290-2
chr1	179238785	179238957	Merged-chr1-179238871-2
chr11	52014322	52014494	Merged-chr11-52014408-2
chr1	168306747	168306919	Merged-chr1-168306833-2
chr1	187171502	187171674	Merged-chr1-187171588-2
chr1	89628402	89628574	Merged-chr1-89628488-2
chr1	17193192	17193364	Merged-chr1-17193278-2
chr1	85617643	85617815	Merged-chr1-85617729-2
chr2	166215253	166215425	Merged-chr2-166215339-2
chr2	170465694	170465866	Merged-chr2-170465780-2
chr2	93433016	93433188	Merged-chr2-93433102-2
chr2	168423184	168423356	Merged-chr2-168423270-2
chr2	126147827	126147999	Merged-chr2-126147913-2
chr2	169617624	169617796	Merged-chr2-169617710-2
chr2	65923152	65923324	Merged-chr2-65923238-2
chr2	92669579	92669751	Merged-chr2-92669665-2
chr2	121101543	121101715	Merged-chr2-121101629-2
chr4	155449126	155449298	Merged-chr4-155449212-2
chr4	152511918	152512090	Merged-chr4-152512004-2
chr4	61824873	61825045	Merged-chr4-61824959-2
chr11	80178122	80178294	Merged-chr11-80178208-2
chr11	104137931	104138103	Merged-chr11-104138017-2
chr4	15010855	15011027	Merged-chr4-15010941-2
chr11	65053160	65053332	Merged-chr11-65053246-2
chr11	88179829	88180001	Merged-chr11-88179915-2
chr11	98180150	98180322	Merged-chr11-98180236-2
chr11	99718830	99719002	Merged-chr11-99718916-2
chr6	132463690	132463862	Merged-chr6-132463776-2
chr6	38315206	38315378	Merged-chr6-38315292-2
chr6	84897823	84897995	Merged-chr6-84897909-2
chr6	91156123	91156295	Merged-chr6-91156209-2
chr6	125876867	125877039	Merged-chr6-125876953-2
chr6	136388022	136388194	Merged-chr6-136388108-2
chr8	125271475	125271647	Merged-chr8-125271561-2
chr8	56298878	56299050	Merged-chr8-56298964-2
chr8	122651540	122651712	Merged-chr8-122651626-2
chr16	32117850	32118022	Merged-chr16-32117936-2
chr16	52083907	52084079	Merged-chr16-52083993-2
chr16	52083433	52083605	Merged-chr16-52083519-2
chr16	22120567	22120739	Merged-chr16-22120653-2
chr16	97815707	97815879	Merged-chr16-97815793-2
chr16	20522553	20522725	Merged-chr16-20522639-2
chr4	46378898	46379070	Merged-chr4-46378984-2
chr4	101455243	101455415	Merged-chr4-101455329-2
chr4	102025780	102025952	Merged-chr4-102025866-2
chr4	129828180	129828352	Merged-chr4-129828266-2
chr4	133896555	133896727	Merged-chr4-133896641-2
chr12	102344574	102344746	Merged-chr12-102344660-2
chr12	105005590	105005762	Merged-chr12-105005676-2
chr12	102224174	102224346	Merged-chr12-102224260-2
chr12	99272788	99272960	Merged-chr12-99272874-2
chr12	51764578	51764750	Merged-chr12-51764664-2
chrX	122831335	122831507	Merged-chrX-122831421-2
chr10	7133147	7133319	Merged-chr10-7133233-2
chr10	42163674	42163846	Merged-chr10-42163760-2
chr8	119851658	119851830	Merged-chr8-119851744-2
chr8	20524568	20524740	Merged-chr8-20524654-2
chr8	70533306	70533478	Merged-chr8-70533392-2
chr8	107085804	107085976	Merged-chr8-107085890-2
chr8	20096907	20097079	Merged-chr8-20096993-2
chr8	19759620	19759792	Merged-chr8-19759706-2
chr4	134972928	134973100	Merged-chr4-134973014-2
chr4	130282966	130283138	Merged-chr4-130283052-2
chr4	133526657	133526829	Merged-chr4-133526743-2
chr4	153567800	153567972	Merged-chr4-153567886-2
chr4	131283815	131283987	Merged-chr4-131283901-2
chr4	43371864	43372036	Merged-chr4-43371950-2
chr4	131912680	131912852	Merged-chr4-131912766-2
chr4	134494321	134494493	Merged-chr4-134494407-2
chr4	151486196	151486368	Merged-chr4-151486282-2
chr13	57949618	57949790	Merged-chr13-57949704-2
chr19	4586804	4586976	Merged-chr19-4586890-2
chr19	57670792	57670964	Merged-chr19-57670878-2
chr19	44904467	44904639	Merged-chr19-44904553-2
chr19	57707806	57707978	Merged-chr19-57707892-2
chr15	101494339	101494511	Merged-chr15-101494425-2
chr15	38251100	38251272	Merged-chr15-38251186-2
chr15	84791002	84791174	Merged-chr15-84791088-2
chr15	101116970	101117142	Merged-chr15-101117056-2
chr15	100414072	100414244	Merged-chr15-100414158-2
chr11	76328926	76329098	Merged-chr11-76329012-2
chr11	6481728	6481900	Merged-chr11-6481814-2
chr11	116124021	116124193	Merged-chr11-116124107-2
chr15	98743946	98744118	Merged-chr15-98744032-2
chr11	85969516	85969688	Merged-chr11-85969602-2
chr16	13428930	13429102	Merged-chr16-13429016-2
chr17	8205265	8205437	Merged-chr17-8205351-2
chr10	4301621	4301793	Merged-chr10-4301707-2
chr10	64147794	64147966	Merged-chr10-64147880-2
chr10	126067009	126067181	Merged-chr10-126067095-2
chr7	142212168	142212340	Merged-chr7-142212254-2
chr7	6121257	6121429	Merged-chr7-6121343-2
chr7	139764248	139764420	Merged-chr7-139764334-2
chr7	142202323	142202495	Merged-chr7-142202409-2
chr7	142280708	142280880	Merged-chr7-142280794-2
chr7	142174875	142175047	Merged-chr7-142174961-2
chr7	142304745	142304917	Merged-chr7-142304831-2
chr7	45226278	45226450	Merged-chr7-45226364-2
chr7	143338736	143338908	Merged-chr7-143338822-2
chr3	100694085	100694257	Merged-chr3-100694171-2
chr3	145690985	145691157	Merged-chr3-145691071-2
chr3	33631412	33631584	Merged-chr3-33631498-2
chr1	92222098	92222270	Merged-chr1-92222184-2
chr1	171590893	171591065	Merged-chr1-171590979-2
chr1	35767460	35767632	Merged-chr1-35767546-2
chr1	58486255	58486427	Merged-chr1-58486341-2
chr1	177977426	177977598	Merged-chr1-177977512-2
chr3	99350110	99350282	Merged-chr3-99350196-2
chr5	92016395	92016567	Merged-chr5-92016481-2
chr5	21617665	21617837	Merged-chr5-21617751-2
chr5	144253003	144253175	Merged-chr5-144253089-2
chr5	36617323	36617495	Merged-chr5-36617409-2
chr5	101085320	101085492	Merged-chr5-101085406-2
chr5	115435768	115435940	Merged-chr5-115435854-2
chr5	121413874	121414046	Merged-chr5-121413960-2
chr7	142303933	142304105	Merged-chr7-142304019-2
chr7	120882784	120882956	Merged-chr7-120882870-2
chr7	142251294	142251466	Merged-chr7-142251380-2
chr7	142240458	142240630	Merged-chr7-142240544-2
chr1	185351787	185351959	Merged-chr1-185351873-2
chr7	81475483	81475655	Merged-chr7-81475569-2
chr18	83310776	83310948	Merged-chr18-83310862-2
chr9	22499872	22500044	Merged-chr9-22499958-2
chr9	41721606	41721778	Merged-chr9-41721692-2
chr9	65359328	65359500	Merged-chr9-65359414-2
chr9	43441319	43441491	Merged-chr9-43441405-2
chr9	47039592	47039764	Merged-chr9-47039678-2
chr9	109367398	109367570	Merged-chr9-109367484-2
chr14	34209185	34209357	Merged-chr14-34209271-2
chr14	104336913	104337085	Merged-chr14-104336999-2
chr14	63179648	63179820	Merged-chr14-63179734-2
chr14	17586040	17586212	Merged-chr14-17586126-2
chr14	38510158	38510330	Merged-chr14-38510244-2
chr14	120882533	120882705	Merged-chr14-120882619-2
chr5	131605887	131606059	Merged-chr5-131605973-2
chr10	18495008	18495180	Merged-chr10-18495094-2
chr10	58924971	58925143	Merged-chr10-58925057-2
chr10	76426523	76426695	Merged-chr10-76426609-2
chr10	77742361	77742533	Merged-chr10-77742447-2
chr7	14586684	14586856	Merged-chr7-14586770-2
chr7	16525761	16525933	Merged-chr7-16525847-2
chr7	37777889	37778061	Merged-chr7-37777975-2
chr7	52419951	52420123	Merged-chr7-52420037-2
chr7	77202297	77202469	Merged-chr7-77202383-2
chr7	126539359	126539531	Merged-chr7-126539445-2
chr7	127678153	127678325	Merged-chr7-127678239-2
chr5	110372146	110372318	Merged-chr5-110372232-2
chr6	97260023	97260195	Merged-chr6-97260109-2
chr6	72827716	72827888	Merged-chr6-72827802-2
chr6	88886457	88886629	Merged-chr6-88886543-2
chr6	84273726	84273898	Merged-chr6-84273812-2
chr6	147788232	147788404	Merged-chr6-147788318-2
chr2	166389665	166389837	Merged-chr2-166389751-2
chr2	60710436	60710608	Merged-chr2-60710522-2
chr2	128912034	128912206	Merged-chr2-128912120-2
chr2	173732532	173732704	Merged-chr2-173732618-2
chr2	169421465	169421637	Merged-chr2-169421551-2
chr2	18893406	18893578	Merged-chr2-18893492-2
chr2	121534931	121535103	Merged-chr2-121535017-2
chr2	32809361	32809533	Merged-chr2-32809447-2
chr2	105257799	105257971	Merged-chr2-105257885-2
chr2	168950776	168950948	Merged-chr2-168950862-2
chr17	87072285	87072457	Merged-chr17-87072371-2
chr17	34388012	34388184	Merged-chr17-34388098-2
chr17	27100304	27100476	Merged-chr17-27100390-2
chr17	8347003	8347175	Merged-chr17-8347089-2
chr17	14557330	14557502	Merged-chr17-14557416-2
chr17	66546532	66546704	Merged-chr17-66546618-2
chr17	66545970	66546142	Merged-chr17-66546056-2
chr17	46093269	46093441	Merged-chr17-46093355-2
chr17	28557873	28558045	Merged-chr17-28557959-2
chr17	69095584	69095756	Merged-chr17-69095670-2
chr17	87272574	87272746	Merged-chr17-87272660-2
chr17	30584967	30585139	Merged-chr17-30585053-2
chr17	87235038	87235210	Merged-chr17-87235124-2
chr17	29509029	29509201	Merged-chr17-29509115-2
chr17	44914364	44914536	Merged-chr17-44914450-2
chr13	40669912	40670084	Merged-chr13-40669998-2
chr1	85262277	85262449	Merged-chr1-85262363-1
chr4	129659129	129659301	Merged-chr4-129659215-1
chr11	97377897	97378069	Merged-chr11-97377983-1
chr8	92171644	92171816	Merged-chr8-92171730-1
chr4	145533350	145533522	Merged-chr4-145533436-1
chr12	81787096	81787268	Merged-chr12-81787182-1
chr8	20435859	20436031	Merged-chr8-20435945-1
chr10	58232421	58232593	Merged-chr10-58232507-1
chr5	121436974	121437146	Merged-chr5-121437060-1
chr18	75677602	75677774	Merged-chr18-75677688-1
chr9	31375949	31376121	Merged-chr9-31376035-1
chr14	76631737	76631909	Merged-chr14-76631823-1
chr13	12811681	12811853	Merged-chr13-12811767-1
chr13	66431488	66431660	Merged-chr13-66431574-1
chrY	90797376	90797548	Merged-chrY-90797462-1
chr8	123996965	123997137	Merged-chr8-123997051-2
chr18	82590953	82591125	Merged-chr18-82591039-2
chr2	173292667	173292839	Merged-chr2-173292753-2
chr10	58224595	58224767	Merged-chr10-58224681-1
chr1	160081717	160081889	Merged-chr1-160081803-2
chr9	108292372	108292544	Merged-chr9-108292458-2
chr7	56052072	56052244	Merged-chr7-56052158-2
chr7	67466443	67466615	Merged-chr7-67466529-2

## Sheet: NEUROD1_open
Chr	St	End	PeakID
chr3	5860582	5860880	chr3-29
chr6	3182971	3183269	chr6-210
chr10	37140962	37141260	chr10-174
chr11	109011670	109011968	chr11-36
chrX	157817548	157817846	chrX-41
chr2	18392657	18392955	chr2-330
chr17	36231405	36231703	chr17-20
chr4	66330605	66330903	chr4-28
chr11	16591516	16591814	chr11-103
chr6	5482279	5482577	chr6-103
chr15	62092719	62093017	chr15-153
chr2	112676769	112677067	chr2-18
chr2	8498595	8498893	chr2-34
chr3	61363522	61363820	chr3-276
chr11	34739008	34739306	chr11-270
chr7	85104597	85104895	chr7-228
chr11	40050583	40050881	chr11-140
chr3	6173836	6174134	chr3-114
chr11	44746746	44747044	chr11-239
chr6	3201371	3201669	chr6-78
chr2	131847561	131847859	chr2-202
chr8	32293189	32293487	chr8-68
chr17	66479753	66480051	chr17-199
chr4	6968829	6969127	chr4-175
chr5	18688493	18688791	chr5-128
chr3	127257623	127257921	chr3-57
chr3	137780041	137780339	chr3-136
chr9	77616903	77617201	chr9-156
chr17	75551714	75552012	chr17-141
chr12	39998111	39998409	chr12-27
chr14	105628698	105628996	chr14-43
chr14	87141236	87141534	chr14-190
chr3	141931327	141931625	chr3-226
chr19	55271535	55271833	chr19-136
chr16	16560084	16560382	chr16-6
chr5	53671510	53671808	chr5-149
chr4	26944654	26944952	chr4-57
chr3	137547601	137547899	chr3-46
chr14	122416259	122416557	chr14-28
chr16	11254366	11254664	chr16-46
chr5	36988983	36989281	chr5-102
chr17	70040788	70041086	chr17-35
chr7	133114977	133115275	chr7-8
chr14	49447800	49448098	chr14-37
chr4	19590689	19590987	chr4-318
chr10	52742723	52743021	chr10-2
chr14	15797133	15797431	chr14-88
chr3	21892240	21892538	chr3-207
chr2	135073043	135073341	chr2-90
chr10	36611413	36611711	chr10-146
chr6	72926672	72926970	chr6-240
chr12	28817402	28817700	chr12-8
chr15	10723583	10723881	chr15-20
chr6	102737264	102737562	chr6-69
chr5	14039207	14039505	chr5-1
chr2	139873814	139874112	chr2-181
chr6	42380820	42381118	chr6-115
chr11	8569353	8569651	chr11-325
chr3	143158455	143158753	chr3-60
chr8	56252373	56252671	chr8-142
chr6	107218361	107218659	chr6-284
chr14	124033370	124033668	chr14-29
chrX	143543235	143543533	chrX-10
chr3	65659073	65659371	chr3-91
chr3	83980555	83980853	chr3-122
chr17	63176492	63176790	chr17-139
chr2	79456768	79457066	chr2-26
chr1	55087899	55088197	chr1-318
chr3	153675946	153676244	chr3-257
chr1	12744543	12744841	chr1-357
chr17	89934069	89934367	chr17-131
chr2	84774851	84775149	chr2-280
chr3	159011326	159011624	chr3-49
chr17	15990293	15990591	chr17-40
chr11	20231172	20231470	chr11-60
chr2	138265255	138265553	chr2-110
chr6	59168968	59169266	chr6-19
chr9	8035601	8035899	chr9-70
chr7	58225706	58226004	chr7-164
chr8	65895742	65896040	chr8-312
chr6	128438644	128438942	chr6-294
chr13	101235267	101235565	chr13-49
chr7	63956962	63957260	chr7-107
chr10	39369689	39369987	chr10-156
chr2	115723398	115723696	chr2-434
chr8	83608096	83608394	chr8-1081
chr9	40801023	40801321	chr9-151
chr4	86183622	86183920	chr4-358
chr4	54073032	54073330	chr4-98
chr13	118265791	118266089	chr13-260
chr3	148343831	148344129	chr3-149
chr10	30729502	30729800	chr10-32
chr8	33914102	33914400	chr8-241
chr3	108433508	108433806	chr3-40
chr9	92930607	92930905	chr9-94
chr5	20974062	20974360	chr5-289
chr2	146302413	146302711	chr2-323
chr12	102758959	102759257	chr12-150
chr7	64839770	64840068	chr7-40
chr7	120102130	120102428	chr7-140
chr8	41239280	41239578	chr8-76
chr1	11277951	11278249	chr1-193
chr8	57353606	57353904	chr8-996
chr10	110856018	110856316	chr10-165
chr14	122255522	122255820	chr14-27
chr1	91413233	91413531	chr1-21
chr10	96658927	96659225	chr10-91
chr18	65565621	65565919	chr18-26
chr5	142961982	142962280	chr5-63
chr16	82596469	82596767	chr16-67
chr18	17418930	17419228	chr18-27
chr10	96309066	96309364	chr10-13
chr12	117039452	117039750	chr12-58
chr13	24831418	24831716	chr13-272
chr13	9329340	9329638	chr13-35
chr11	93614944	93615242	chr11-259
chr19	21784476	21784774	chr19-3
chr8	36155440	36155738	chr8-59
chr3	68565052	68565350	chr3-78
chr5	72876029	72876327	chr5-201
chr1	6457993	6458291	chr1-77
chr10	3941398	3941696	chr10-62
chr10	85539897	85540195	chr10-46
chr8	54076240	54076538	chr8-3
chr19	12794704	12795002	chr19-53
chr1	46921697	46921995	chr1-316
chr2	109942066	109942364	chr2-497
chr2	115581191	115581489	chr2-143
chr8	90670782	90671080	chr8-205
chr6	149131221	149131519	chr6-33
chr18	64013960	64014258	chr18-45
chr1	52953499	52953797	chr1-317
chr6	122340599	122340897	chr6-10
chr2	107813907	107814205	chr2-159
chr14	8403408	8403706	chr14-82
chr4	122955451	122955749	chr4-133
chr9	102726270	102726568	chr9-116
chrX	85829040	85829338	chrX-20
chr6	70964141	70964439	chr6-48
chr1	192834654	192834952	chr1-72
chr8	67931080	67931378	chr8-313
chr8	101996795	101997093	chr8-52
chr9	94670298	94670596	chr9-51
chr15	91018608	91018906	chr15-27
chr11	6895075	6895373	chr11-153
chr9	17874924	17875222	chr9-149
chr11	43653199	43653497	chr11-133
chr8	27174541	27174839	chr8-348
chr18	42090712	42091010	chr18-37
chr3	144412785	144413083	chr3-148
chr3	129831320	129831618	chr3-68
chr8	60736949	60737247	chr8-1003
chr1	74111402	74111700	chr1-41
chr4	33823917	33824215	chr4-60
chr5	98167201	98167499	chr5-79
chr11	30161220	30161518	chr11-74
chr14	15978425	15978723	chr14-133
chr5	91945579	91945877	chr5-204
chr19	41013623	41013921	chr19-97
chr16	45724816	45725114	chr16-22
chr19	44284290	44284588	chr19-57
chr6	17562463	17562761	chr6-190
chr13	112985759	112986057	chr13-172
chr3	18695482	18695780	chr3-126
chr5	81654058	81654356	chr5-267
chr19	4510402	4510700	chr19-103
chr15	91078116	91078414	chr15-23
chr2	43555030	43555328	chr2-190
chr2	114178324	114178622	chr2-138
chr10	24834594	24834892	chr10-144
chr17	11092950	11093248	chr17-52
chr6	5325064	5325362	chr6-189
chr1	100878027	100878325	chr1-50
chr19	15495677	15495975	chr19-32
chr15	25754527	25754825	chr15-9
chr1	136690140	136690438	chr1-92
chr9	96140037	96140335	chr9-372
chr10	95596024	95596322	chr10-235
chr2	4559654	4559952	chr2-362
chr2	52958910	52959208	chr2-376
chr8	36539355	36539653	chr8-219
chr6	54096867	54097165	chr6-59
chr2	126552428	126552726	chr2-285
chr3	15000771	15001069	chr3-4
chr1	186510547	186510845	chr1-138
chr7	24517168	24517466	chr7-203
chr1	128860096	128860394	chr1-381
chr3	39978957	39979255	chr3-235
chr2	171285733	171286031	chr2-62
chr8	3630889	3631187	chr8-213
chr7	119861789	119862087	chr7-31
chr11	10087977	10088275	chr11-100
chr7	143124335	143124633	chr7-84
chr2	126302391	126302689	chr2-51
chr1	166125028	166125326	chr1-57
chr2	134960735	134961033	chr2-180
chr9	53384583	53384881	chr9-153
chr9	37054206	37054504	chr9-58
chr3	135546331	135546629	chr3-64
chr14	54412093	54412391	chr14-67
chr17	43036106	43036404	chr17-104
chr2	44538116	44538414	chr2-191
chr10	100066056	100066354	chr10-139
chr6	80589772	80590070	chr6-157
chr11	5741208	5741506	chr11-152
chr14	99107729	99108027	chr14-159
chr15	9094463	9094761	chr15-135
chr11	67017747	67018045	chr11-195
chr2	101722978	101723276	chr2-342
chr15	25762313	25762611	chr15-10
chr4	32923457	32923755	chr4-203
chr14	13349266	13349564	chr14-113
chr14	16434885	16435183	chr14-80
chr7	3290169	3290467	chr7-123
chrX	162009802	162010100	chrX-6
chr3	122433985	122434283	chr3-79
chr8	72316180	72316478	chr8-272
chr10	12614653	12614951	chr10-126
chr1	4150800	4151098	chr1-152
chr1	54484963	54485261	chr1-6
chr8	92134195	92134493	chr8-77
chr6	137542570	137542868	chr6-85
chr5	148701959	148702257	chr5-48
chr3	47660566	47660864	chr3-272
chr16	85528278	85528576	chr16-24
chr4	66737433	66737731	chr4-192
chr8	114116133	114116431	chr8-13
chr3	11212350	11212648	chr3-66
chr16	73120596	73120894	chr16-30
chr12	117683993	117684291	chr12-36
chr5	134006726	134007024	chr5-212
chr10	120171502	120171800	chr10-184
chr16	90437430	90437728	chr16-163
chr19	34655362	34655660	chr19-14
chr9	3871191	3871489	chr9-118
chr6	112205533	112205831	chr6-165
chr11	28582046	28582344	chr11-234
chr1	86509432	86509730	chr1-259
chr19	17138210	17138508	chr19-13
chr10	67002732	67003030	chr10-88
chr1	11395436	11395734	chr1-155
chr7	4445501	4445799	chr7-86
chr9	116649410	116649708	chr9-187
chr2	117119888	117120186	chr2-257
chr11	28734950	28735248	chr11-132
chr6	10091029	10091327	chr6-64
chr7	19093891	19094189	chr7-124
chr15	39728809	39729107	chr15-126
chr2	45225397	45225695	chr2-115
chr15	103215170	103215468	chr15-66
chr15	62106586	62106884	chr15-52
chr1	64226295	64226593	chr1-132
chr17	17448694	17448992	chr17-95
chr3	13250720	13251018	chr3-82
chr17	70900761	70901059	chr17-98
chr10	109684596	109684894	chr10-38
chr8	90828740	90829038	chr8-380
chr12	27083172	27083470	chr12-250
chr8	3395224	3395522	chr8-10
chr2	93176930	93177228	chr2-46
chr7	126776750	126777048	chr7-182
chr15	25364997	25365295	chr15-102
chr10	39106911	39107209	chr10-78
chr13	54216009	54216307	chr13-70
chr11	3539167	3539465	chr11-322
chr10	108287080	108287378	chr10-236
chr10	103346836	103347134	chr10-311
chr2	115747611	115747909	chr2-129
chr1	84868862	84869160	chr1-325
chr1	7047214	7047512	chr1-311
chr16	91480530	91480828	chr16-165
chr9	50124215	50124513	chr9-206
chr3	22156576	22156874	chr3-151
chr14	52010784	52011082	chr14-209
chr5	118436700	118436998	chr5-361
chr17	43077119	43077417	chr17-28
chr6	97048497	97048795	chr6-37
chr2	41341629	41341927	chr2-102
chr2	136107604	136107902	chr2-146
chr12	35642376	35642674	chr12-145
chr12	25475497	25475795	chr12-52
chr6	122715857	122716155	chr6-250
chr2	157058722	157059020	chr2-263
chr7	138850172	138850470	chr7-238
chr11	67011801	67012099	chr11-418
chr15	74955488	74955786	chr15-32
chr3	22297907	22298205	chr3-7
chr11	26372071	26372369	chr11-166
chr12	118530138	118530436	chr12-154
chr18	73665420	73665718	chr18-39
chr10	10472346	10472644	chr10-242
chr13	94706613	94706911	chr13-296
chr16	44357946	44358244	chr16-101
chr3	45681352	45681650	chr3-188
chr3	100521640	100521938	chr3-132
chr3	21935765	21936063	chr3-99
chr15	54744776	54745074	chr15-84
chr10	127063513	127063811	chr10-320
chr4	155066794	155067092	chr4-484
chr8	14340344	14340642	chr8-138
chrX	48072028	48072326	chrX-15
chr17	90696537	90696835	chr17-111
chr1	168101556	168101854	chr1-508
chr14	78288834	78289132	chr14-4
chr1	84217834	84218132	chr1-7
chr10	21102000	21102298	chr10-12
chr3	136376921	136377219	chr3-179
chr17	52601294	52601592	chr17-127
chr8	86888067	86888365	chr8-375
chr8	70659610	70659908	chr8-429
chr6	18485045	18485343	chr6-170
chr8	69121472	69121770	chr8-11
chrX	42432101	42432399	chrX-17
chr10	130293739	130294037	chr10-141
chr2	84837173	84837471	chr2-20
chr5	92812966	92813264	chr5-17
chr2	170772068	170772366	chr2-82
chr18	63653423	63653721	chr18-96
chr2	146300130	146300428	chr2-123
chr8	10925539	10925837	chr8-46
chr10	25314167	25314465	chr10-193
chr18	80938205	80938503	chr18-121
chr2	45736315	45736613	chr2-69
chr2	45037704	45038002	chr2-106
chr8	3552294	3552592	chr8-129
chr4	13300227	13300525	chr4-21
chr8	37916453	37916751	chr8-244
chr4	145104863	145105161	chr4-376
chr11	20145405	20145703	chr11-328
chr16	57243357	57243655	chr16-39
chr1	77496957	77497255	chr1-257
chr5	13318733	13319031	chr5-253
chr10	23195378	23195676	chr10-20
chr7	112743757	112744055	chr7-157
chr8	68368390	68368688	chr8-57
chr7	107236849	107237147	chr7-21
chr10	88162705	88163003	chr10-60
chr7	49347890	49348188	chr7-117
chr9	78520444	78520742	chr9-157
chr1	182030148	182030446	chr1-204
chr3	17489733	17490031	chr3-30
chr14	34693954	34694252	chr14-56
chr3	59880248	59880546	chr3-237
chr18	81251965	81252263	chr18-21
chr17	35503891	35504189	chr17-116
chr2	117019190	117019488	chr2-31
chr4	19137634	19137932	chr4-76
chr5	102478093	102478391	chr5-81
chr15	81399590	81399888	chr15-197
chr8	81893259	81893557	chr8-17
chr4	38424539	38424837	chr4-72
chr8	92827180	92827478	chr8-147
chr6	122342172	122342470	chr6-83
chr4	87834278	87834576	chr4-293
chr3	121430614	121430912	chr3-175
chr1	180888729	180889027	chr1-59
chr18	16037902	16038200	chr18-93
chr19	29285609	29285907	chr19-127
chr17	93313325	93313623	chr17-21
chr2	20665594	20665892	chr2-126
chr11	73036884	73037182	chr11-275
chr2	180227381	180227679	chr2-79
chr17	15380555	15380853	chr17-58
chr12	110696236	110696534	chr12-88
chr4	94752543	94752841	chr4-453
chr5	30907747	30908045	chr5-337
chrX	85077626	85077924	chrX-11
chr14	48655057	48655355	chr14-57
chr6	136470955	136471253	chr6-207
chr9	3258719	3259017	chr9-292
chr11	29636857	29637155	chr11-56
chr7	140841167	140841465	chr7-131
chr4	45489970	45490268	chr4-439
chr13	79765459	79765757	chr13-295
chr12	86498755	86499053	chr12-16
chr2	161339480	161339778	chr2-117
chr14	27066388	27066686	chr14-74
chr6	120580181	120580479	chr6-134
chr5	3943220	3943518	chr5-252
chr15	73676384	73676682	chr15-177
chr8	4214479	4214777	chr8-837
chr17	15248000	15248298	chr17-8
chr16	57175521	57175819	chr16-25
chr7	130252212	130252510	chr7-9
chr3	8245767	8246065	chr3-11
chr15	93521079	93521377	chr15-8
chr5	110099046	110099344	chr5-10
chr18	12949145	12949443	chr18-54
chr17	9167198	9167496	chr17-93
chr5	72902442	72902740	chr5-8
chr3	98024334	98024632	chr3-14
chr13	107663863	107664161	chr13-164
chr16	17220240	17220538	chr16-122
chr5	149184224	149184522	chr5-382
chr8	65046832	65047130	chr8-143
chr11	26931799	26932097	chr11-96
chr2	27505619	27505917	chr2-68
chr4	23710711	23711009	chr4-93
chr3	17794763	17795061	chr3-264
chr15	56420711	56421009	chr15-81
chr2	128211878	128212176	chr2-322
chr10	33195981	33196279	chr10-1
chr14	123660117	123660415	chr14-16
chr8	128654854	128655152	chr8-463
chr9	102690110	102690408	chr9-61
chr13	20041224	20041522	chr13-45
chr1	75588916	75589214	chr1-66
chr5	43869067	43869365	chr5-58
chr3	41099746	41100044	chr3-118
chr1	66960987	66961285	chr1-406
chr3	8005739	8006037	chr3-260
chr7	6770234	6770532	chr7-37
chr10	116562308	116562606	chr10-82
chr2	61403121	61403419	chr2-193
chr19	23136477	23136775	chr19-60
chr15	25740203	25740501	chr15-148
chr16	42575392	42575690	chr16-146
chr9	32607219	32607517	chr9-115
chr17	56762078	56762376	chr17-224
chr17	80801469	80801767	chr17-9
chr4	126465785	126466083	chr4-32
chr3	118500287	118500585	chr3-39
chr5	9690917	9691215	chr5-55
chrX	97376554	97376852	chrX-59
chr2	161166636	161166934	chr2-96
chr5	22574192	22574490	chr5-256
chr11	47640510	47640808	chr11-75
chr14	21088692	21088990	chr14-30
chr12	118650849	118651147	chr12-45
chr5	127639058	127639356	chr5-319
chr6	97517736	97518034	chr6-130
chr16	71885722	71886020	chr16-5
chr2	154428074	154428372	chr2-87
chr3	49769339	49769637	chr3-52
chr6	31948132	31948430	chr6-193
chr10	95461258	95461556	chr10-66
chr8	57340856	57341154	chr8-174
chr12	37080028	37080326	chr12-218
chr1	22387083	22387381	chr1-358
chr2	149982499	149982797	chr2-23
chr8	122523076	122523374	chr8-38
chr16	35146279	35146577	chr16-91
chrX	157601517	157601815	chrX-25
chr19	22234257	22234555	chr19-75
chr10	49417479	49417777	chr10-95
chr5	81519482	81519780	chr5-15
chr7	49071218	49071516	chr7-36
chr3	142348797	142349095	chr3-80
chrX	117299912	117300210	chrX-21
chr8	31128345	31128643	chr8-646
chr4	145271639	145271937	chr4-20
chr10	20153674	20153972	chr10-36
chr17	3081980	3082278	chr17-41
chr6	76378672	76378970	chr6-201
chr12	12788649	12788947	chr12-155
chr9	105915212	105915510	chr9-48
chr15	102399507	102399805	chr15-79
chr5	3527402	3527700	chr5-234
chr2	150735823	150736121	chr2-65
chr13	26119411	26119709	chr13-104
chr18	38601503	38601801	chr18-199
chr11	69059412	69059710	chr11-475
chr8	106619516	106619814	chr8-19
chr7	45162144	45162442	chr7-154
chr2	61176762	61177060	chr2-152
chr3	87974307	87974605	chr3-85
chr4	141570086	141570384	chr4-182
chr10	86972096	86972394	chr10-164
chr4	98003728	98004026	chr4-295
chr7	115568877	115569175	chr7-89
chr5	149636137	149636435	chr5-162
chr6	29216335	29216633	chr6-121
chr4	12770490	12770788	chr4-150
chr6	139350965	139351263	chr6-107
chr11	107352799	107353097	chr11-214
chr19	47019377	47019675	chr19-10
chr6	127701091	127701389	chr6-30
chr1	59697772	59698070	chr1-62
chr2	152180450	152180748	chr2-77
chr18	19453006	19453304	chr18-43
chr2	21964106	21964404	chr2-187
chr12	12943200	12943498	chr12-97
chr5	103724310	103724608	chr5-184
chr12	91684333	91684631	chr12-205
chr8	87938919	87939217	chr8-752
chr13	20600275	20600573	chr13-95
chr5	104072303	104072601	chr5-134
chr4	81669202	81669500	chr4-225
chr11	108917394	108917692	chr11-283
chr4	75300652	75300950	chr4-508
chr6	7753070	7753368	chr6-43
chr15	49192555	49192853	chr15-172
chr4	33198135	33198433	chr4-94
chr12	117173065	117173363	chr12-79
chr9	65109447	65109745	chr9-23
chr6	122624511	122624809	chr6-84
chr6	17749247	17749545	chr6-120
chr5	43983134	43983432	chr5-262
chr12	40995718	40996016	chr12-50
chr5	125392941	125393239	chr5-159
chr11	29603587	29603885	chr11-235
chr1	59423268	59423566	chr1-210
chr6	38730510	38730808	chr6-25
chr13	95534197	95534495	chr13-117
chr7	97804635	97804933	chr7-213
chr1	153641565	153641863	chr1-11
chr13	113858667	113858965	chr13-32
chrY	90812215	90812513	chrY-2
chr8	69063558	69063856	chr8-204
chr9	31976324	31976622	chr9-202
chr18	78972994	78973292	chr18-50
chr10	90709560	90709858	chr10-112
chr17	85645753	85646051	chr17-110
chr12	40984823	40985121	chr12-128
chr14	25719482	25719780	chr14-116
chrX	130505650	130505948	chrX-46
chr10	67083755	67084053	chr10-160
chr2	172516468	172516766	chr2-184
chr19	56874174	56874472	chr19-64
chr9	59656058	59656356	chr9-308
chr16	94170315	94170613	chr16-133
chr8	70522914	70523212	chr8-112
chr8	27249909	27250207	chr8-157
chr4	148739025	148739323	chr4-567
chr13	56582168	56582466	chr13-15
chr3	34757873	34758171	chr3-35
chr10	88708784	88709082	chr10-81
chr7	31155856	31156154	chr7-94
chr9	4020090	4020388	chr9-159
chr2	73572480	73572778	chr2-486
chr4	98845839	98846137	chr4-524
chr1	12814428	12814726	chr1-3
chr4	100097562	100097860	chr4-99
chr12	101016002	101016300	chr12-51
chr10	110931231	110931529	chr10-73
chr1	140434803	140435101	chr1-177
chr11	46119747	46120045	chr11-272
chr1	18831144	18831442	chr1-44
chr6	86950878	86951176	chr6-13
chr12	26068160	26068458	chr12-25
chr8	95504864	95505162	chr8-114
chr6	90515047	90515345	chr6-161
chr12	52671437	52671735	chr12-164
chr1	9649264	9649562	chr1-16
chr2	121270545	121270843	chr2-36
chr4	101872094	101872392	chr4-61
chr14	122267688	122267986	chr14-51
chr2	79379197	79379495	chr2-253
chr12	25124739	25125037	chr12-23
chr5	37246608	37246906	chr5-38
chr15	81831530	81831828	chr15-31
chr11	60176888	60177186	chr11-287
chr3	97811205	97811503	chr3-194
chr9	113459051	113459349	chr9-324
chr8	16591488	16591786	chr8-116
chr3	16724829	16725127	chr3-116
chr8	89003381	89003679	chr8-7
chr2	124145479	124145777	chr2-27
chr13	59656887	59657185	chr13-50
chr19	60055110	60055408	chr19-102
chr13	44018877	44019175	chr13-279
chr8	89015709	89016007	chr8-757
chr13	119409012	119409310	chr13-196
chr2	154426598	154426896	chr2-45
chr1	34007060	34007358	chr1-48
chr8	45246388	45246686	chr8-51
chr11	30750031	30750329	chr11-179
chr16	22406120	22406418	chr16-82
chr1	96482912	96483210	chr1-217
chr1	4970682	4970980	chr1-42
chr4	6093419	6093717	chr4-59
chr10	81178591	81178889	chr10-182
chr4	141565403	141565701	chr4-472
chr6	83421916	83422214	chr6-54
chr3	31094047	31094345	chr3-62
chr9	73026223	73026521	chr9-141
chr14	24253885	24254183	chr14-204
chr14	117337312	117337610	chr14-46
chr19	35180170	35180468	chr19-77
chr7	100663264	100663562	chr7-262
chr10	13964932	13965230	chr10-328
chrX	95881251	95881549	chrX-12
chr7	27473314	27473612	chr7-204
chr12	66591689	66591987	chr12-12
chr15	56856085	56856383	chr15-174
chr9	102961413	102961711	chr9-53
chr14	13770739	13771037	chr14-53
chr6	3396149	3396447	chr6-256
chr14	24779120	24779418	chr14-69
chr2	20209315	20209613	chr2-211
chr2	142334467	142334765	chr2-439
chr18	67308505	67308803	chr18-132
chrX	99556812	99557110	chrX-5
chr14	28958678	28958976	chr14-21
chr4	62262303	62262601	chr4-95
chr13	28959684	28959982	chr13-81
chr19	10972791	10973089	chr19-65
chr5	92811238	92811536	chr5-98
chr14	25317987	25318285	chr14-100
chr18	77117415	77117713	chr18-7
chr16	21701896	21702194	chr16-18
chr12	36933274	36933572	chr12-54
chr14	27670013	27670311	chr14-106
chr2	60870518	60870816	chr2-315
chr15	25027177	25027475	chr15-25
chr1	77456768	77457066	chr1-114
chr2	37767100	37767398	chr2-173
chr5	67138742	67139040	chr5-130
chr7	108196995	108197293	chr7-214
chr2	152804313	152804611	chr2-6
chr7	139945634	139945932	chr7-71
chr12	47163950	47164248	chr12-46
chr1	192455099	192455397	chr1-99
chr16	18459967	18460265	chr16-89
chr3	145632905	145633203	chr3-228
chr9	34382274	34382572	chr9-271
chr17	47887472	47887770	chr17-15
chr6	93849360	93849658	chr6-28
chr17	76499860	76500158	chr17-160
chr13	99609361	99609659	chr13-4
chr1	74824962	74825260	chr1-80
chr6	58596160	58596458	chr6-50
chr6	142867595	142867893	chr6-18
chr10	21701730	21702028	chr10-30
chr6	93912887	93913185	chr6-60
chr1	75124555	75124853	chr1-158
chr13	34239370	34239668	chr13-123
chr3	17793647	17793945	chr3-206
chr10	30843798	30844096	chr10-248
chr7	138153447	138153745	chr7-101
chr15	29433140	29433438	chr15-136
chr5	26904424	26904722	chr5-259
chr9	74860494	74860792	chr9-41
chr4	75562567	75562865	chr4-64
chr13	86345281	86345579	chr13-59
chr8	121898507	121898805	chr8-232
chr11	6773478	6773776	chr11-233
chr5	64806063	64806361	chr5-152
chr7	96563742	96564040	chr7-294
chr2	160872440	160872738	chr2-219
chr5	28210062	28210360	chr5-216
chr5	137631319	137631617	chr5-35
chr4	76175173	76175471	chr4-65
chr11	113326431	113326729	chr11-150
chr17	70738548	70738846	chr17-200
chr9	11853165	11853463	chr9-332
chr6	134983871	134984169	chr6-253
chr10	100128177	100128475	chr10-262
chr19	48807360	48807658	chr19-5
chr12	16850837	16851135	chr12-33
chr2	163463365	163463663	chr2-156
chr12	86932571	86932869	chr12-136
chr18	68942945	68943243	chr18-133
chr10	127289291	127289589	chr10-321
chr10	53503392	53503690	chr10-285
chr2	58533613	58533911	chr2-192
chr6	54566139	54566437	chr6-268
chr10	37397250	37397548	chr10-4
chr1	153071601	153071899	chr1-110
chr17	47989913	47990211	chr17-62
chr18	37826238	37826536	chr18-57
chr8	85473029	85473327	chr8-373
chr1	63110559	63110857	chr1-366
chr2	92947955	92948253	chr2-109
chr12	86801140	86801438	chr12-56
chr11	17460918	17461216	chr11-164
chr2	17970715	17971013	chr2-169
chr7	6913725	6914023	chr7-306
chr2	102121815	102122113	chr2-81
chr8	111789183	111789481	chr8-151
chr5	61160267	61160565	chr5-121
chrX	99883472	99883770	chrX-34
chr8	46616983	46617281	chr8-360
chr4	19872715	19873013	chr4-432
chr13	63668972	63669270	chr13-293
chr6	108796814	108797112	chr6-9
chr7	85542177	85542475	chr7-51
chr6	5119147	5119445	chr6-63
chr11	19851212	19851510	chr11-326
chr11	31396751	31397049	chr11-6
chr14	70352013	70352311	chr14-49
chr2	146838563	146838861	chr2-94
chr8	36528292	36528590	chr8-99
chr6	99009886	99010184	chr6-132
chr13	46418245	46418543	chr13-281
chr11	66932805	66933103	chr11-90
chr6	140337011	140337309	chr6-42
chr12	54110965	54111263	chr12-37
chr13	99356877	99357175	chr13-67
chr2	44526319	44526617	chr2-229
chr19	47450501	47450799	chr19-101
chr7	75880683	75880981	chr7-177
chr9	121314160	121314458	chr9-20
chr1	36061094	36061392	chr1-20
chr1	52150018	52150316	chr1-34
chr8	117314611	117314909	chr8-58
chr4	105223883	105224181	chr4-118
chr5	136102194	136102492	chr5-280
chr6	47984046	47984344	chr6-264
chr12	21167742	21168040	chr12-71
chr10	3646495	3646793	chr10-123
chr12	110472238	110472536	chr12-151
chr6	145062789	145063087	chr6-209
chr3	59260755	59261053	chr3-212
chr5	14048711	14049009	chr5-254
chr10	120950150	120950448	chr10-238
chr18	79105946	79106244	chr18-66
chr1	78181895	78182193	chr1-234
chr8	111892086	111892384	chr8-800
chr11	116023959	116024257	chr11-443
chr8	69939671	69939969	chr8-33
chr7	98361477	98361775	chr7-48
chr18	35815535	35815833	chr18-33
chr10	100038585	100038883	chr10-67
chr13	75765754	75766052	chr13-97
chr14	66214052	66214350	chr14-183
chr1	165653538	165653836	chr1-40
chr6	111373062	111373360	chr6-29
chr5	137934027	137934325	chr5-213
chr9	114752971	114753269	chr9-325
chr5	39076611	39076909	chr5-4
chr9	119571346	119571644	chr9-109
chr8	70700663	70700961	chr8-271
chr3	96675705	96676003	chr3-219
chr6	54034521	54034819	chr6-318
chr6	123332369	123332667	chr6-292
chr16	90165609	90165907	chr16-19
chr5	142924435	142924733	chr5-23
chr14	11556443	11556741	chr14-79
chr2	66409127	66409425	chr2-194
chr19	47327967	47328265	chr19-72
chr10	61242122	61242420	chr10-178
chr13	59292994	59293292	chr13-290
chr16	93717246	93717544	chr16-52
chr12	118659559	118659857	chr12-66
chr14	57537458	57537756	chr14-71
chr1	72805148	72805446	chr1-144
chr17	35509316	35509614	chr17-67
chr4	55208915	55209213	chr4-191
chr19	43498768	43499066	chr19-88
chr1	119119999	119120297	chr1-419
chr13	28718455	28718753	chr13-27
chr2	146073307	146073605	chr2-47
chr9	70194679	70194977	chr9-78
chr12	80227982	80228280	chr12-38
chr10	98749371	98749669	chr10-53
chr4	8687968	8688266	chr4-108
chr2	146290949	146291247	chr2-139
chr8	23562126	23562424	chr8-139
chr15	10716029	10716327	chr15-83
chr6	129110380	129110678	chr6-205
chr10	77197391	77197689	chr10-350
chr1	172525425	172525723	chr1-164
chr3	8988917	8989215	chr3-139
chr11	74105132	74105430	chr11-311
chr11	63270991	63271289	chr11-309
chr10	57562557	57562855	chr10-224
chr14	12389162	12389460	chr14-22
chr1	88668805	88669103	chr1-86
chr8	126825924	126826222	chr8-195
chr6	120112317	120112615	chr6-166
chr1	96746817	96747115	chr1-293
chr7	80889137	80889435	chr7-210
chr8	127775605	127775903	chr8-294
chr6	20687021	20687319	chr6-258
chr15	47196301	47196599	chr15-227
chr4	124708908	124709206	chr4-368
chr17	31254584	31254882	chr17-185
chr17	15343134	15343432	chr17-23
chr16	32637140	32637438	chr16-43
chr19	7268055	7268353	chr19-22
chrX	79108599	79108897	chrX-51
chr2	77815790	77816088	chr2-487
chr6	112603969	112604267	chr6-23
chr11	88689747	88690045	chr11-91
chr5	134340063	134340361	chr5-73
chr16	30646145	30646443	chr16-70
chr14	45462426	45462724	chr14-75
chr18	35887712	35888010	chr18-105
chr4	133729814	133730112	chr4-10
chr12	86466232	86466530	chr12-32
chr8	106603937	106604235	chr8-254
chr14	27044317	27044615	chr14-136
chr4	23613080	23613378	chr4-390
chr7	79428272	79428570	chr7-17
chr8	95887590	95887888	chr8-192
chr9	98726696	98726994	chr9-130
chr8	86272703	86273001	chr8-250
chr16	30940030	30940328	chr16-50
chr4	84527101	84527399	chr4-110
chr4	106855824	106856122	chr4-111
chr19	24491839	24492137	chr19-28
chr2	103186903	103187201	chr2-281
chr18	60319023	60319321	chr18-115
chr10	23978075	23978373	chr10-217
chr12	76216864	76217162	chr12-230
chr19	46518550	46518848	chr19-9
chr2	45001662	45001960	chr2-84
chr9	119991535	119991833	chr9-110
chr15	70923857	70924155	chr15-109
chr7	31059181	31059479	chr7-172
chr15	11461656	11461954	chr15-92
chr18	63863852	63864150	chr18-145
chr2	105114142	105114440	chr2-384
chr16	94313538	94313836	chr16-166
chr4	117125558	117125856	chr4-406
chr1	89870533	89870831	chr1-8
chr11	19986539	19986837	chr11-73
chr8	61516124	61516422	chr8-106
chr15	101221561	101221859	chr15-74
chr2	114057470	114057768	chr2-200
chr4	125282569	125282867	chr4-460
chr6	116670995	116671293	chr6-17
chr11	49261302	49261600	chr11-147
chr10	100094197	100094495	chr10-131
chr14	76740240	76740538	chr14-156
chr4	129381243	129381541	chr4-370
chr5	142546385	142546683	chr5-32
chr6	97667059	97667357	chr6-77
chr18	46212955	46213253	chr18-62
chr17	15207982	15208280	chr17-206
chr11	57970561	57970859	chr11-411
chr17	33951147	33951445	chr17-298
chr13	92611986	92612284	chr13-36
chr3	95675467	95675765	chr3-38
chr17	66446213	66446511	chr17-53
chr15	13393144	13393442	chr15-42
chr1	36982557	36982855	chr1-181
chr14	78538625	78538923	chr14-172
chr4	103410268	103410566	chr4-363
chr9	18962040	18962338	chr9-120
chr2	50187039	50187337	chr2-313
chr11	44696900	44697198	chr11-303
chr9	33233828	33234126	chr9-55
chr2	75265569	75265867	chr2-134
chr4	41628457	41628755	chr4-320
chr7	81063391	81063689	chr7-67
chr6	52105260	52105558	chr6-53
chr4	126248486	126248784	chr4-163
chr10	80590610	80590908	chr10-181
chr1	11748384	11748682	chr1-251
chr16	55321894	55322192	chr16-9
chr4	116994347	116994645	chr4-132
chr12	51703951	51704249	chr12-81
chr11	11152737	11153035	chr11-190
chr9	106338591	106338889	chr9-186
chr2	165810114	165810412	chr2-295
chr13	51845862	51846160	chr13-82
chr9	113793140	113793438	chr9-133
chr18	82477271	82477569	chr18-82
chr2	32132571	32132869	chr2-228
chr2	20768685	20768983	chr2-303
chr10	125800643	125800941	chr10-42
chr11	72576220	72576518	chr11-101
chr10	51961501	51961799	chr10-49
chr9	49936030	49936328	chr9-123
chr16	38471713	38472011	chr16-106
chr8	48449690	48449988	chr8-308
chr11	115367656	115367954	chr11-442
chr10	66920709	66921007	chr10-130
chr2	75959911	75960209	chr2-28
chr6	7971014	7971312	chr6-26
chr10	118461125	118461423	chr10-45
chr5	133753756	133754054	chr5-62
chr2	75633899	75634197	chr2-116
chr7	37625830	37626128	chr7-95
chr8	79031007	79031305	chr8-178
chr3	27270242	27270540	chr3-101
chr2	146631066	146631364	chr2-261
chr11	94162950	94163248	chr11-314
chr7	130888079	130888377	chr7-2
chr2	61246981	61247279	chr2-25
chr9	84295808	84296106	chr9-42
chr8	27236327	27236625	chr8-55
chr10	18430175	18430473	chr10-48
chr7	118593856	118594154	chr7-111
chr17	67996178	67996476	chr17-80
chr9	48860565	48860863	chr9-163
chr4	34771595	34771893	chr4-392
chr1	177753444	177753742	chr1-438
chr17	66457317	66457615	chr17-97
chr15	12708410	12708708	chr15-93
chr5	146920534	146920832	chr5-250
chr9	120759821	120760119	chr9-45
chr7	132616510	132616808	chr7-41
chr6	127769925	127770223	chr6-49
chr17	29975840	29976138	chr17-134
chr1	167069650	167069948	chr1-300
chr2	79647775	79648073	chr2-278
chr9	83061243	83061541	chr9-211
chr8	84650100	84650398	chr8-544
chr9	31376735	31377033	chr9-269
chr5	61122311	61122609	chr5-150
chr11	113785607	113785905	chr11-63
chr14	8207075	8207373	chr14-18
chr1	74295673	74295971	chr1-65
chr1	140065882	140066180	chr1-338
chr4	137791408	137791706	chr4-374
chr14	72847509	72847807	chr14-214
chr19	56775958	56776256	chr19-137
chr1	91414122	91414420	chr1-4
chr2	125134246	125134544	chr2-32
chr15	101097989	101098287	chr15-13
chr18	42733004	42733302	chr18-24
chr9	46328713	46329011	chr9-72
chr13	73259589	73259887	chr13-62
chr4	126260846	126261144	chr4-113
chr9	71227249	71227547	chr9-169
chr1	83535564	83535862	chr1-287
chr6	147145335	147145633	chr6-188
chr10	99261088	99261386	chr10-183
chr12	89049287	89049585	chr12-185
chr11	22610404	22610702	chr11-88
chr1	134061069	134061367	chr1-128
chr3	41423252	41423550	chr3-72
chr8	105474230	105474528	chr8-125
chr3	151366295	151366593	chr3-96
chr4	155173547	155173845	chr4-185
chr11	81613963	81614261	chr11-182
chr13	17700335	17700633	chr13-148
chr3	59270499	59270797	chr3-155
chr11	89067485	89067783	chr11-344
chr1	134063201	134063499	chr1-25
chr8	118394283	118394581	chr8-83
chr13	63528401	63528699	chr13-84
chr1	180434180	180434478	chr1-166
chr17	13552031	13552329	chr17-114
chr11	117848979	117849277	chr11-445
chr11	114795284	114795582	chr11-3
chr16	12960894	12961192	chr16-3
chr6	120274855	120275153	chr6-106
chr5	12138912	12139210	chr5-215
chr15	96333475	96333773	chr15-21
chr3	58593604	58593902	chr3-28
chr10	61415759	61416057	chr10-40
chr5	23432753	23433051	chr5-68
chr13	90143387	90143685	chr13-139
chr9	3871938	3872236	chr9-198
chr7	114904435	114904733	chr7-192
chr13	48159122	48159420	chr13-3
chr16	18724679	18724977	chr16-8
chr1	8097038	8097336	chr1-153
chr5	113873156	113873454	chr5-112
chr9	60865904	60866202	chr9-208
chr6	39131556	39131854	chr6-196
chr16	76319892	76320190	chr16-188
chr2	74426814	74427112	chr2-39
chr5	105498505	105498803	chr5-185
chr9	35569513	35569811	chr9-225
chr13	24001793	24002091	chr13-236
chr11	88629794	88630092	chr11-72
chr9	58279268	58279566	chr9-47
chr19	50559268	50559566	chr19-12
chr3	46870842	46871140	chr3-90
chr15	84681542	84681840	chr15-99
chr7	66292919	66293217	chr7-44
chr18	78756528	78756826	chr18-64
chr7	135641802	135642100	chr7-151
chr1	60852863	60853161	chr1-211
chr8	94922463	94922761	chr8-282
chr3	144556674	144556972	chr3-203
chr10	19404496	19404794	chr10-22
chrX	89115724	89116022	chrX-26
chr11	66906122	66906420	chr11-253
chr5	140581564	140581862	chr5-16
chr4	133040591	133040889	chr4-62
chr10	60997443	60997741	chr10-199
chr18	73216901	73217199	chr18-160
chr1	132878907	132879205	chr1-384
chr11	70764228	70764526	chr11-420
chr4	117131993	117132291	chr4-9
chr4	91223872	91224170	chr4-131
chr13	48130758	48131056	chr13-79
chr11	53800122	53800420	chr11-240
chr7	77738927	77739225	chr7-155
chr13	47855756	47856054	chr13-152
chr1	133667663	133667961	chr1-421
chr16	6206709	6207007	chr16-198
chr2	27377996	27378294	chr2-21
chr14	68934864	68935162	chr14-8
chr7	18923898	18924196	chr7-56
chr3	96084376	96084674	chr3-67
chr8	44959479	44959777	chr8-159
chr16	29877786	29878084	chr16-75
chr1	156614090	156614388	chr1-243
chr13	48324202	48324500	chr13-283
chr8	65982756	65983054	chr8-86
chr7	25530819	25531117	chr7-104
chr9	107279650	107279948	chr9-131
chr14	123990582	123990880	chr14-98
chr12	100337750	100338048	chr12-7
chr11	6181001	6181299	chr11-158
chr7	128079997	128080295	chr7-121
chr5	128439836	128440134	chr5-61
chr5	144371138	144371436	chr5-126
chr9	43880030	43880328	chr9-179
chr4	59806340	59806638	chr4-355
chr2	62341515	62341813	chr2-419
chr4	142071685	142071983	chr4-39
chr18	45015611	45015909	chr18-19
chr5	113420694	113420992	chr5-36
chr10	58532159	58532457	chr10-108
chr10	61929078	61929376	chr10-225
chr2	78189613	78189911	chr2-19
chr1	85592910	85593208	chr1-13
chr11	117976176	117976474	chr11-117
chr4	59047247	59047545	chr4-171
chr17	27041224	27041522	chr17-100
chr18	37836416	37836714	chr18-112
chr16	94066338	94066636	chr16-191
chr4	155189774	155190072	chr4-24
chr8	78147423	78147721	chr8-23
chr5	132923371	132923669	chr5-13
chr8	118845748	118846046	chr8-126
chr3	7683105	7683403	chr3-137
chr19	4849826	4850124	chr19-139
chr19	32867239	32867537	chr19-152
chr3	139023583	139023881	chr3-32
chr4	6689215	6689513	chr4-85
chr8	31121397	31121695	chr8-92
chr11	106269075	106269373	chr11-226
chr13	75541510	75541808	chr13-213
chr5	98283732	98284030	chr5-308
chr14	52066302	52066600	chr14-17
chr10	41467342	41467640	chr10-37
chr16	31326794	31327092	chr16-71
chr11	84585603	84585901	chr11-279
chr6	89059544	89059842	chr6-159
chr9	67208567	67208865	chr9-235
chr14	57732503	57732801	chr14-239
chr1	7313428	7313726	chr1-33
chr2	29835414	29835712	chr2-54
chr2	178594398	178594696	chr2-105
chr11	120824756	120825054	chr11-139
chr10	62892926	62893224	chr10-72
chr8	25465735	25466033	chr8-140
chr14	64163731	64164029	chr14-77
chr3	102167620	102167918	chr3-110
chr7	41512227	41512525	chr7-174
chr10	126957725	126958023	chr10-186
chr17	43197358	43197656	chr17-153
chr4	108363021	108363319	chr4-331
chr3	75860770	75861068	chr3-241
chr8	64152236	64152534	chr8-30
chr18	59312684	59312982	chr18-40
chr19	12499569	12499867	chr19-59
chr7	45922934	45923232	chr7-186
chr5	43814518	43814816	chr5-6
chr7	145173073	145173371	chr7-14
chr4	127227351	127227649	chr4-48
chr6	5380919	5381217	chr6-66
chr3	88572046	88572344	chr3-173
chr8	60633353	60633651	chr8-269
chr3	131019645	131019943	chr3-198
chr14	12690311	12690609	chr14-147
chr11	101334559	101334857	chr11-385
chr9	115450967	115451265	chr9-21
chr7	143437888	143438186	chr7-38
chr8	56614951	56615249	chr8-56
chr4	106866782	106867080	chr4-83
chr8	70647412	70647710	chr8-175
chr14	114952306	114952604	chr14-93
chr8	18023765	18024063	chr8-184
chr18	34093008	34093306	chr18-90
chr6	65854627	65854925	chr6-144
chr17	12021288	12021586	chr17-39
chr13	99676489	99676787	chr13-74
chr7	84098186	84098484	chr7-98
chr15	38452840	38453138	chr15-54
chr6	91286698	91286996	chr6-104
chr12	100996092	100996390	chr12-125
chr14	79843086	79843384	chr14-111
chr6	46205538	46205836	chr6-197
chr7	37563325	37563623	chr7-206
chr8	90827994	90828292	chr8-326
chr2	168791138	168791436	chr2-357
chr18	64933145	64933443	chr18-212
chr4	9031733	9032031	chr4-4
chr11	85900413	85900711	chr11-71
chr1	136470539	136470837	chr1-102
chr2	165833534	165833832	chr2-207
chr5	115491846	115492144	chr5-138
chr2	39605054	39605352	chr2-249
chr8	25602706	25603004	chr8-345
chr7	27622238	27622536	chr7-221
chr5	88806659	88806957	chr5-350
chr19	7265902	7266200	chr19-1
chr2	163433937	163434235	chr2-78
chr4	120850985	120851283	chr4-77
chr7	100700190	100700488	chr7-128
chr1	191698433	191698731	chr1-250
chr2	152398197	152398495	chr2-324
chr4	149445375	149445673	chr4-51
chr4	86241909	86242207	chr4-142
chr11	82251301	82251599	chr11-198
chr18	68497177	68497475	chr18-116
chr16	35817282	35817580	chr16-180
chr4	91237099	91237397	chr4-325
chr18	57405353	57405651	chr18-179
chr7	80746500	80746798	chr7-3
chr3	107681251	107681549	chr3-21
chr12	88214634	88214932	chr12-34
chr14	13651095	13651393	chr14-104
chr18	68117716	68118014	chr18-183
chr10	45800029	45800327	chr10-8
chr8	107876490	107876788	chr8-34
chr16	35588795	35589093	chr16-63
chr11	114873121	114873419	chr11-229
chr18	64888902	64889200	chr18-107
chr2	152029490	152029788	chr2-290
chr2	65842394	65842692	chr2-420
chr1	135615925	135616223	chr1-496
chr8	111898643	111898941	chr8-801
chr1	182163142	182163440	chr1-76
chr2	81848698	81848996	chr2-99
chr2	84762355	84762653	chr2-196
chr1	152792828	152793126	chr1-53
chr2	152177558	152177856	chr2-130
chr6	39226247	39226545	chr6-98
chr17	16218667	16218965	chr17-99
chr19	21175322	21175620	chr19-55
chr8	89926892	89927190	chr8-225
chr9	61361134	61361432	chr9-183
chr4	148770586	148770884	chr4-279
chr9	47280686	47280984	chr9-352
chr13	102895957	102896255	chr13-7
chr8	113405307	113405605	chr8-37
chr18	38903838	38904136	chr18-15
chr11	67379810	67380108	chr11-106
chr8	3414799	3415097	chr8-84
chrX	41692093	41692391	chrX-14
chr1	132200608	132200906	chr1-175
chr8	87831795	87832093	chr8-251
chr7	15962703	15963001	chr7-276
chr7	52915959	52916257	chr7-318
chr17	12106335	12106633	chr17-4
chr16	28809118	28809416	chr16-41
chr18	55133719	55134017	chr18-158
chr11	79593527	79593825	chr11-379
chr2	180099635	180099933	chr2-528
chr2	154421299	154421597	chr2-7
chr4	119071409	119071707	chr4-3
chr1	157101486	157101784	chr1-39
chr3	31000091	31000389	chr3-27
chr14	64652655	64652953	chr14-44
chr14	27272665	27272963	chr14-105
chr14	78590456	78590754	chr14-188
chr5	132500943	132501241	chr5-324
chr12	12787870	12788168	chr12-248
chr16	15053025	15053323	chr16-12
chr2	131190712	131191010	chr2-145
chr3	27045379	27045677	chr3-100
chr1	194616227	194616525	chr1-205
chrX	155903154	155903452	chrX-28
chr9	32224268	32224566	chr9-175
chr17	83546424	83546722	chr17-163
chr2	125985063	125985361	chr2-258
chr4	133660332	133660630	chr4-414
chr11	6684831	6685129	chr11-359
chr10	118121913	118122211	chr10-5
chr3	17589988	17590286	chr3-10
chr13	104576458	104576756	chr13-118
chr7	92744058	92744356	chr7-147
chr3	84971538	84971836	chr3-329
chr17	25756902	25757200	chr17-38
chr7	90540884	90541182	chr7-77
chr17	7529170	7529468	chr17-92
chr10	19432606	19432904	chr10-132
chr18	10328838	10329136	chr18-137
chr1	84890156	84890454	chr1-326
chr19	58606008	58606306	chr19-73
chr9	99158362	99158660	chr9-284
chr4	128715833	128716131	chr4-5
chr16	17208783	17209081	chr16-27
chr6	90232170	90232468	chr6-36
chr2	124641187	124641485	chr2-89
chr11	80335710	80336008	chr11-131
chr1	153590240	153590538	chr1-129
chr14	73476581	73476879	chr14-63
chr8	78543581	78543879	chr8-164
chr3	151294310	151294608	chr3-88
chr8	60660591	60660889	chr8-203
chr14	17405533	17405831	chr14-201
chr7	28302195	28302493	chr7-15
chr5	101426082	101426380	chr5-44
chr12	118884027	118884325	chr12-91
chr6	7949081	7949379	chr6-169
chr8	118285870	118286168	chr8-454
chr13	51920570	51920868	chr13-1
chr6	108259719	108260017	chr6-45
chr8	77970526	77970824	chr8-132
chr7	82752163	82752461	chr7-108
chr10	51271415	51271713	chr10-96
chr13	42549252	42549550	chr13-113
chr2	160471656	160471954	chr2-326
chr5	142974647	142974945	chr5-231
chr1	186929240	186929538	chr1-305
chr4	35125263	35125561	chr4-499
chr1	22378171	22378469	chr1-30
chr9	65094360	65094658	chr9-43
chr14	122256350	122256648	chr14-41
chr18	34102866	34103164	chr18-75
chr5	134941855	134942153	chr5-125
chr6	126164835	126165133	chr6-135
chr15	78773329	78773627	chr15-113
chr3	134238633	134238931	chr3-224
chr9	45349892	45350190	chr9-273
chr2	163481622	163481920	chr2-220
chr4	149937051	149937349	chr4-254
chr6	85044645	85044943	chr6-220
chr10	127524769	127525067	chr10-324
chr13	113706265	113706563	chr13-26
chr1	92432152	92432450	chr1-67
chr1	170990143	170990441	chr1-389
chr1	139039591	139039889	chr1-10
chr4	124441981	124442279	chr4-90
chr3	108588270	108588568	chr3-112
chr14	11673088	11673386	chr14-146
chr4	8956371	8956669	chr4-43
chr12	99220392	99220690	chr12-47
chr2	30445295	30445593	chr2-272
chr16	22955689	22955987	chr16-124
chr2	153370810	153371108	chr2-397
chr10	29866872	29867170	chr10-280
chr7	108184472	108184770	chr7-78
chr7	79578736	79579034	chr7-165
chr10	130259429	130259727	chr10-150
chr11	11855039	11855337	chr11-154
chr10	25632204	25632502	chr10-154
chr7	133205731	133206029	chr7-236
chr17	35939168	35939466	chr17-217
chr12	33516664	33516962	chr12-75
chr15	64590036	64590334	chr15-86
chr14	75863482	75863780	chr14-110
chr8	95251821	95252119	chr8-190
chr16	20805125	20805423	chr16-69
chr3	27665315	27665613	chr3-183
chr13	50372903	50373201	chr13-247
chr8	106150059	106150357	chr8-89

## Sheet: NEUROD1_closed
Chr	St	End	PeakID
chr5	76104003	76104301	chr5-94
chr15	52964011	52964309	chr15-22
chr8	46279525	46279823	chr8-28
chr10	70260635	70260933	chr10-83
chr6	97582875	97583173	chr6-131
chr2	20422301	20422599	chr2-410
chr19	46987320	46987618	chr19-155
chrX	166779550	166779848	chrX-4
chr7	111740100	111740398	chr7-24
chr17	4182237	4182535	chr17-45
chr11	88406757	88407055	chr11-176
chr4	13283799	13284097	chr4-236
chr4	155784946	155785244	chr4-282
chr1	182605368	182605666	chr1-248
chr3	21770216	21770514	chr3-168
chr8	117322853	117323151	chr8-333
chr13	57215958	57216256	chr13-212
chr14	79872471	79872769	chr14-189
chr16	4598880	4599178	chr16-169
chr5	124023846	124024144	chr5-276
chr8	59730658	59730956	chr8-1001
chr9	48633000	48633298	chr9-301
chr10	40218895	40219193	chr10-11
chr5	148616083	148616381	chr5-28
chr8	84635215	84635513	chr8-70
chr1	133893229	133893527	chr1-73
chr10	93635939	93636237	chr10-61
chr13	97680257	97680555	chr13-73
chr6	8897352	8897650	chr6-71
chr1	152165433	152165731	chr1-135
chr9	121667269	121667567	chr9-111
chr6	103838321	103838619	chr6-91
chr12	54326615	54326913	chr12-72
chr1	155810035	155810333	chr1-178
chr7	126326942	126327240	chr7-120
chr4	137778034	137778332	chr4-213
chr7	30399622	30399920	chr7-133
chr1	131095952	131096250	chr1-239
chr7	27560562	27560860	chr7-170
chr7	35463058	35463356	chr7-185
chr14	56530873	56531171	chr14-152
chr3	96432431	96432729	chr3-193
chr7	141523055	141523353	chr7-218
chr17	48611760	48612058	chr17-193
chr11	46944269	46944567	chr11-406
chr3	136699847	136700145	chr3-352
chr4	116819435	116819733	chr4-458
chr5	4686549	4686847	chr5-286
chr8	73855937	73856235	chr8-1046
chr9	32646868	32647166	chr9-339
chr11	94978650	94978948	chr11-494
chr11	113922941	113923239	chr11-439
chr18	61338659	61338957	chr18-241
chr4	119076346	119076644	chr4-89
chr18	79071467	79071765	chr18-135
chr2	18896054	18896352	chr2-83
chr9	22035622	22035920	chr9-71
chr15	76309173	76309471	chr15-36
chr13	37880014	37880312	chr13-124
chr4	133003390	133003688	chr4-26
chr10	11515160	11515458	chr10-19
chr2	26486817	26487115	chr2-50
chr8	110764688	110764986	chr8-73
chr8	90238585	90238883	chr8-66
chr1	35995799	35996097	chr1-78
chr11	97567531	97567829	chr11-144
chr15	53899360	53899658	chr15-51
chr8	48243920	48244218	chr8-161
chr11	80551615	80551913	chr11-197
chr7	102369790	102370088	chr7-148
chr15	38169692	38169990	chr15-76
chr16	37617812	37618110	chr16-99
chr19	7148163	7148461	chr19-51
chr11	83672558	83672856	chr11-278
chr2	181044060	181044358	chr2-301
chr3	121504992	121505290	chr3-161
chr13	93641997	93642295	chr13-157
chr14	55940259	55940557	chr14-122
chr15	76923076	76923374	chr15-111
chr16	14859386	14859684	chr16-121
chr9	97056229	97056527	chr9-216
chr12	118887981	118888279	chr12-172
chr13	115116761	115117059	chr13-195
chr6	125378920	125379218	chr6-184
chr8	34671814	34672112	chr8-408
chr8	43768543	43768841	chr8-359
chr12	71123280	71123578	chr12-166
chr5	135951227	135951525	chr5-228
chr8	122699133	122699431	chr8-458
chr9	64523297	64523595	chr9-280
chr10	61327286	61327584	chr10-251
chr12	71376988	71377286	chr12-229
chr11	71745959	71746257	chr11-476
chr16	95119322	95119620	chr16-253
chr2	32824158	32824456	chr2-75
chr8	122296189	122296487	chr8-43
chr3	58871760	58872058	chr3-36
chr11	116972803	116973101	chr11-122
chr2	75360602	75360900	chr2-175
chr8	84148609	84148907	chr8-249
chr9	109896920	109897218	chr9-288
chr6	99575750	99576048	chr6-283
chr6	112256844	112257142	chr6-340
chr4	135912839	135913137	chr4-15
chr16	30798166	30798464	chr16-4
chr6	49304140	49304438	chr6-7
chr4	34239666	34239964	chr4-25
chr6	80554956	80555254	chr6-12
chr3	71919922	71920220	chr3-16
chr13	99363907	99364205	chr13-28
chr5	123257463	123257761	chr5-31
chr4	57824749	57825047	chr4-82
chr15	83009050	83009348	chr15-33
chr14	70473561	70473859	chr14-38
chr5	36767307	36767605	chr5-52
chr8	6729690	6729988	chr8-94
chr1	118342269	118342567	chr1-91
chr15	89184404	89184702	chr15-53
chr2	119504273	119504571	chr2-144
chr6	143359354	143359652	chr6-93
chr2	149805220	149805518	chr2-155
chr17	90694051	90694349	chr17-91
chr15	92046054	92046352	chr15-78
chr17	34641317	34641615	chr17-103
chr1	57706073	57706371	chr1-170
chr2	142834811	142835109	chr2-203
chr9	56791777	56792075	chr9-137
chr11	119585801	119586099	chr11-232
chr5	119989186	119989484	chr5-141
chr2	160741547	160741845	chr2-266
chr5	27009192	27009490	chr5-164
chr8	127151747	127152045	chr8-293
chr14	123535651	123535949	chr14-129
chr10	22184504	22184802	chr10-152
chr18	20809092	20809390	chr18-111
chr2	155642122	155642420	chr2-292
chr8	88947846	88948144	chr8-378
chr8	89516670	89516968	chr8-325
chr11	57035610	57035908	chr11-307
chr11	95369942	95370240	chr11-261
chr16	63005658	63005956	chr16-130
chr18	64212057	64212355	chr18-130
chr19	38155185	38155483	chr19-87
chr1	177035529	177035827	chr1-304
chr7	130923327	130923625	chr7-235
chr11	99056195	99056493	chr11-348
chr8	67489894	67490192	chr8-518
chr1	187153566	187153864	chr1-444
chr8	80982913	80983211	chr8-740
chr8	99765695	99765993	chr8-561
chr3	137011243	137011541	chr3-354
chr5	49799586	49799884	chr5-342
chr6	120451396	120451694	chr6-291
chr8	63996995	63997293	chr8-695
chr13	99593536	99593834	chr13-171
chr15	31532794	31533092	chr15-123
chr15	102007523	102007821	chr15-19
chr12	12995252	12995550	chr12-98
chr11	72032129	72032427	chr11-274
chr12	86697999	86698297	chr12-135
chr2	69129098	69129396	chr2-250
chr6	51486062	51486360	chr6-314
chr6	89615851	89616149	chr6-277
chr19	44270947	44271245	chr19-4
chr18	13692126	13692424	chr18-12
chr13	97428180	97428478	chr13-48
chr16	95824995	95825293	chr16-38
chr5	124206715	124207013	chr5-47
chr11	80312203	80312501	chr11-130
chr7	96420175	96420473	chr7-60
chr5	93235954	93236252	chr5-78
chr5	148694382	148694680	chr5-86
chr9	28208781	28209079	chr9-114
chr2	101172917	101173215	chr2-153
chr2	48427545	48427843	chr2-230
chr10	59921396	59921694	chr10-120
chr8	78117185	78117483	chr8-273
chr8	126587877	126588175	chr8-258
chr1	188014450	188014748	chr1-229
chr9	108133538	108133836	chr9-217
chr3	139031449	139031747	chr3-200
chr7	18942960	18943258	chr7-200
chr8	9764377	9764675	chr8-341
chr10	44730639	44730937	chr10-175
chr13	55736359	55736657	chr13-189
chr9	118901903	118902201	chr9-239
chr10	83266659	83266957	chr10-203
chrX	60940175	60940473	chrX-50
chr7	119159992	119160290	chr7-264
chr10	99333730	99334028	chr10-261
chr7	128534581	128534879	chr7-267
chr8	3891842	3892140	chr8-601
chr8	8085989	8086287	chr8-467
chr12	27437739	27438037	chr12-217
chr15	4307474	4307772	chr15-164
chr2	90515419	90515717	chr2-428
chr5	47277763	47278061	chr5-296
chr9	34326729	34327027	chr9-270
chr12	41640727	41641025	chr12-219
chr16	16009617	16009915	chr16-222
chr16	35600361	35600659	chr16-214
chr17	10025140	10025438	chr17-203
chr8	95589868	95590166	chr8-191
chr7	99645111	99645409	chr7-261
chr8	36611784	36612082	chr8-21
chr5	126108662	126108960	chr5-100
chr14	57620584	57620882	chr14-153
chr4	8714120	8714418	chr4-317
chr15	94652077	94652375	chr15-200
chr15	10768798	10769096	chr15-191
chr11	118972972	118973270	chr11-7
chr12	84894011	84894309	chr12-2
chr4	74076750	74077048	chr4-30
chr16	48372540	48372838	chr16-28
chr4	154099360	154099658	chr4-58
chr11	76317373	76317671	chr11-129
chr2	165049158	165049456	chr2-97
chr5	130050457	130050755	chr5-72
chr8	119786062	119786360	chr8-108
chr8	123410215	123410513	chr8-109
chr2	42784087	42784385	chr2-127
chr6	108321682	108321980	chr6-70
chr4	105327017	105327315	chr4-161
chr12	6046809	6047107	chr12-74
chr14	73469584	73469882	chr14-87
chr8	46011363	46011661	chr8-185
chr19	59423691	59423989	chr19-58
chr12	51562360	51562658	chr12-111
chr12	100223765	100224063	chr12-106
chr3	90076870	90077168	chr3-130
chr6	61352439	61352737	chr6-116
chr6	94911427	94911725	chr6-129
chr10	84437182	84437480	chr10-137
chr6	53982375	53982673	chr6-124
chr2	84640851	84641149	chr2-279
chr6	143461422	143461720	chr6-187
chr14	45572312	45572610	chr14-139
chr2	153019420	153019718	chr2-325
chr4	138488296	138488594	chr4-272
chr5	126060233	126060531	chr5-189
chr7	138168331	138168629	chr7-197
chr8	22065080	22065378	chr8-303
chr2	146594281	146594579	chr2-288
chr4	125946045	125946343	chr4-297
chr4	154085828	154086126	chr4-281
chr7	47068018	47068316	chr7-224
chr9	45539276	45539574	chr9-227
chr9	64624109	64624407	chr9-232
chr16	26518014	26518312	chr16-141
chr2	76033734	76034032	chr2-379
chr4	34067191	34067489	chr4-391
chr5	96037966	96038264	chr5-270
chr6	140333411	140333709	chr6-254
chr15	32041819	32042117	chr15-169
chr2	75998767	75999065	chr2-423
chr2	101828934	101829232	chr2-494
chr4	25197183	25197481	chr4-434
chr5	116100298	116100596	chr5-359
chr7	143905277	143905575	chr7-350
chr9	105929283	105929581	chr9-322
chr11	58034959	58035257	chr11-471
chr7	19952048	19952346	chr7-65
chr8	120825228	120825526	chr8-287
chr15	103042340	103042638	chr15-162
chr3	87972344	87972642	chr3-216
chr9	63109365	63109663	chr9-360
chr5	100753413	100753711	chr5-14
chr5	121807269	121807567	chr5-54
chr8	105446264	105446562	chr8-97
chr18	34564077	34564375	chr18-52
chr2	27380829	27381127	chr2-131
chr1	169916660	169916958	chr1-223
chr4	43630548	43630846	chr4-238
chr8	93038495	93038793	chr8-281
chr1	186887167	186887465	chr1-249
chr4	62781390	62781688	chr4-290
chr5	132209700	132209998	chr5-191
chr9	46055889	46056187	chr9-204
chr13	99560641	99560939	chr13-193
chr2	72287586	72287884	chr2-421
chr5	91404215	91404513	chr5-306
chr17	5959861	5960159	chr17-228
chr11	95392347	95392645	chr11-34
chr2	93141369	93141667	chr2-24
chr8	83748682	83748980	chr8-61
chr14	21925542	21925840	chr14-34
chr13	50367088	50367386	chr13-58
chr8	106964434	106964732	chr8-102
chr9	57554554	57554852	chr9-89
chr4	136945351	136945649	chr4-138
chr4	132971624	132971922	chr4-137
chr4	87448425	87448723	chr4-151
chr6	75707514	75707812	chr6-68
chr12	85792899	85793197	chr12-68
chr4	130805051	130805349	chr4-164
chr13	51833604	51833902	chr13-76
chr7	28309744	28310042	chr7-105
chr7	98756566	98756864	chr7-109
chr10	44605156	44605454	chr10-119
chr4	57855427	57855725	chr4-170
chr4	138596735	138597033	chr4-195
chr10	7840802	7841100	chr10-115
chr9	40528822	40529120	chr9-161
chr16	29686358	29686656	chr16-97
chr2	31449555	31449853	chr2-248
chr4	115686240	115686538	chr4-241
chr12	70070312	70070610	chr12-112
chr3	129516088	129516386	chr3-146
chr7	96967295	96967593	chr7-166
chr8	88033008	88033306	chr8-323
chr8	124495649	124495947	chr8-290
chr9	71976067	71976365	chr9-191
chr11	102335302	102335600	chr11-294
chr12	26535247	26535545	chr12-144
chr15	37932074	37932372	chr15-137
chr17	48065068	48065366	chr17-156
chr6	97569415	97569713	chr6-222
chr8	43474029	43474327	chr8-416
chr8	112111047	112111345	chr8-388
chr9	4505038	4505336	chr9-242
chr11	19939311	19939609	chr11-327
chr11	99948849	99949147	chr11-349
chr12	70338956	70339254	chr12-182
chr17	31457231	31457529	chr17-188
chr8	35959147	35959445	chr8-490
chr8	126467423	126467721	chr8-591
chr6	23598032	23598330	chr6-259
chr9	9512562	9512860	chr9-293
chr4	132565394	132565692	chr4-413
chr6	120472926	120473224	chr6-344
chr8	20847291	20847589	chr8-626
chr19	24981412	24981710	chr19-151
chr11	59068866	59069164	chr11-119
chrX	157810925	157811223	chrX-37
chr3	137932878	137933176	chr3-225
chr1	126994503	126994801	chr1-379
chr3	19747327	19747625	chr3-33
chr15	79044949	79045247	chr15-39
chr7	124131343	124131641	chr7-90
chr11	120665531	120665829	chr11-151
chr3	102194938	102195236	chr3-73
chr2	170547544	170547842	chr2-149
chr13	51378412	51378710	chr13-136
chr17	14175844	14176142	chr17-123
chr5	130871259	130871557	chr5-211
chr8	28585815	28586113	chr8-350
chr13	51063219	51063517	chr13-207
chr16	87553938	87554236	chr16-162
chr4	98914929	98915227	chr4-362
chr4	150120298	150120596	chr4-426
chr1	51888020	51888318	chr1-403
chr2	149869572	149869870	chr2-513
chr8	88383645	88383943	chr8-1097
chr7	28953482	28953780	chr7-10
chr12	27646618	27646916	chr12-10
chr2	44930938	44931236	chr2-44
chr12	80816714	80817012	chr12-13
chr3	122113138	122113436	chr3-26
chr8	78683670	78683968	chr8-53
chr4	135129148	135129446	chr4-74
chr8	87816201	87816499	chr8-71
chr16	30260020	30260318	chr16-45
chr9	59197578	59197876	chr9-77
chr11	88299404	88299702	chr11-121
chr15	40124311	40124609	chr15-55
chr3	152976852	152977150	chr3-81
chr9	53836024	53836322	chr9-124
chr3	103880836	103881134	chr3-111
chr7	46572880	46573178	chr7-127
chr16	35523049	35523347	chr16-84
chr1	136094706	136095004	chr1-200
chr8	56856196	56856494	chr8-202
chr10	81411439	81411737	chr10-136
chr2	170436234	170436532	chr2-298
chr5	63993865	63994163	chr5-151
chr7	129789618	129789916	chr7-183
chr17	27456361	27456659	chr17-147
chr7	6776433	6776731	chr7-199
chr7	122304036	122304334	chr7-216
chr8	9813270	9813568	chr8-297
chr17	37531528	37531826	chr17-135
chr1	157036710	157037008	chr1-343
chr2	158215824	158216122	chr2-293
chr5	124334476	124334774	chr5-224
chr8	63707368	63707666	chr8-365
chr8	64017630	64017928	chr8-425
chr8	87279725	87280023	chr8-376
chr9	34841655	34841953	chr9-247
chr10	92314710	92315008	chr10-207
chr2	49688142	49688440	chr2-312
chr5	73919242	73919540	chr5-265
chr6	72182572	72182870	chr6-200
chr8	92121947	92122245	chr8-446
chr13	23591902	23592200	chr13-235
chr2	44401959	44402257	chr2-414
chr5	114423961	114424259	chr5-313
chr12	9356646	9356944	chr12-194
chr18	11482085	11482383	chr18-166
chr19	25433224	25433522	chr19-108
chr19	45763762	45764060	chr19-131
chr1	38578529	38578827	chr1-453
chr2	84303524	84303822	chr2-488
chr2	134920531	134920829	chr2-438
chr8	81695292	81695590	chr8-1076
chr14	38118552	38118850	chr14-178
chr17	66232733	66233031	chr17-197
chr15	82902602	82902900	chr15-114
chr4	43495178	43495476	chr4-256
chr2	163469726	163470024	chr2-353
chr18	35851383	35851681	chr18-174
chr18	67374134	67374432	chr18-245
chr13	93098665	93098963	chr13-156
chr7	73716253	73716551	chr7-16
chrX	99218113	99218411	chrX-9
chr10	62113981	62114279	chr10-56
chr8	122661174	122661472	chr8-127
chr11	115400951	115401249	chr11-162
chrX	144986994	144987292	chrX-16
chr2	165629923	165630221	chr2-148
chr7	101465017	101465315	chr7-138
chr7	107467922	107468220	chr7-129
chr8	13645377	13645675	chr8-234
chr13	54159792	54160090	chr13-153
chr8	87689167	87689465	chr8-377
chr4	107096056	107096354	chr4-364
chr4	88686369	88686667	chr4-399
chr7	28452672	28452970	chr7-279
chr2	31513649	31513947	chr2-16
chr15	78770957	78771255	chr15-12
chr6	118431511	118431809	chr6-32
chr11	22763084	22763382	chr11-109
chr14	54387517	54387815	chr14-48
chr2	65904736	65905034	chr2-103
chr16	34561910	34562208	chr16-58
chr10	61175409	61175707	chr10-79
chr8	87964836	87965134	chr8-133
chr9	63007453	63007751	chr9-102
chr6	51385127	51385425	chr6-99
chr11	103661910	103662208	chr11-201
chr15	77291635	77291933	chr15-57
chr8	91997250	91997548	chr8-189
chr5	141182441	141182739	chr5-144
chr16	29635769	29636067	chr16-83
chr8	107226154	107226452	chr8-209
chr4	89450788	89451086	chr4-226
chr4	127414620	127414918	chr4-228
chr5	5528338	5528636	chr5-127
chr11	116286514	116286812	chr11-248
chr12	108410471	108410769	chr12-115
chr7	98794111	98794409	chr7-188
chr10	111026027	111026325	chr10-166
chr11	75323467	75323765	chr11-276
chr14	53991599	53991897	chr14-121
chr18	19545931	19546229	chr18-110
chr19	45024756	45025054	chr19-79
chr1	192528180	192528478	chr1-351
chr1	194363463	194363761	chr1-309
chr2	166558314	166558612	chr2-356
chr12	55848791	55849089	chr12-181
chr18	37617660	37617958	chr18-126
chr6	128259240	128259538	chr6-227
chr8	27287365	27287663	chr8-404
chr8	123640443	123640741	chr8-590
chr5	35925162	35925460	chr5-295
chr8	109487317	109487615	chr8-797
chr10	20121947	20122245	chr10-273
chr11	113430504	113430802	chr11-438
chr13	19025381	19025679	chr13-270
chr14	26627867	26628165	chr14-205
chr1	134699454	134699752	chr1-424
chr1	183952618	183952916	chr1-442
chr2	126492741	126493039	chr2-506
chr4	34309061	34309359	chr4-498
chr4	48206841	48207139	chr4-506
chr7	127452442	127452740	chr7-302
chr8	116049877	116050175	chr8-1205
chr9	67418037	67418335	chr9-363
chr10	28489949	28490247	chr10-247
chr11	28299664	28299962	chr11-402
chr13	48014939	48015237	chr13-282
chr17	33900223	33900521	chr17-248
chr15	76976713	76977011	chr15-4
chr12	80178053	80178351	chr12-148
chr13	54324255	54324553	chr13-22
chr2	74451653	74451951	chr2-85
chr11	71636875	71637173	chr11-107
chr8	68379902	68380200	chr8-87
chr7	29292201	29292499	chr7-66
chr15	55137371	55137669	chr15-38
chr16	94957428	94957726	chr16-88
chr7	132414519	132414817	chr7-150
chr5	148609615	148609913	chr5-193
chr3	31344476	31344774	chr3-232
chr6	97758947	97759245	chr6-282
chr8	114714148	114714446	chr8-808
chr11	118727669	118727967	chr11-446
chr18	78516990	78517288	chr18-249
chr6	87752902	87753200	chr6-11
chr2	158673557	158673855	chr2-48
chr11	76294029	76294327	chr11-83
chr18	5388524	5388822	chr18-20
chr8	69132137	69132435	chr8-49
chr4	128247386	128247684	chr4-84
chr18	82284200	82284498	chr18-29
chr1	89998728	89999026	chr1-82
chr7	83548603	83548901	chr7-72
chr2	59250264	59250562	chr2-133
chr9	109641562	109641860	chr9-96
chr18	29170491	29170789	chr18-69
chr10	43672549	43672847	chr10-106
chr4	132206090	132206388	chr4-210
chr13	118657058	118657356	chr13-119
chr2	13318060	13318358	chr2-225
chr12	102908225	102908523	chr12-96
chr2	60922371	60922669	chr2-232
chr2	166330444	166330742	chr2-209
chr8	14851843	14852141	chr8-235
chr5	113504697	113504995	chr5-208
chr9	72644034	72644332	chr9-192
chr18	38076026	38076324	chr18-113
chr2	168810994	168811292	chr2-268
chr17	46453818	46454116	chr17-154
chr19	21368871	21369169	chr19-69
chr6	49318167	49318465	chr6-198
chr7	143428434	143428732	chr7-272
chr18	29668776	29669074	chr18-171
chr2	50347556	50347854	chr2-374
chr4	125469777	125470075	chr4-461
chr8	88482602	88482900	chr8-754
chr1	135330550	135330848	chr1-495
chr4	154886836	154887134	chr4-482
chr8	19454386	19454684	chr8-866
chr8	81249498	81249796	chr8-741
chr10	108203558	108203856	chr10-312
chr12	21460806	21461104	chr12-215
chr14	61703987	61704285	chr14-168
chr11	73031623	73031921	chr11-196
chr2	154565667	154565965	chr2-205
chr14	63714637	63714935	chr14-246
chr8	41575816	41576114	chr8-414
chr8	119630807	119631105	chr8-134
chr5	139418809	139419107	chr5-107
chr4	138494966	138495264	chr4-181
chr1	132153048	132153346	chr1-185
chr17	27643261	27643559	chr17-149
chr1	189991136	189991434	chr1-350
chr15	103122414	103122712	chr15-189
chr9	56657927	56658225	chr9-306
chr14	122340151	122340449	chr14-197
chr15	83475419	83475717	chr15-179
chr1	134055919	134056217	chr1-422
chr6	24311486	24311784	chr6-304
chr8	57233653	57233951	chr8-994
chr17	8240601	8240899	chr17-230
chr14	80233029	80233327	chr14-5
chr18	25121332	25121630	chr18-5
chr14	63182685	63182983	chr14-11
chr8	72527137	72527435	chr8-31
chr9	65975873	65976171	chr9-44
chr2	121826238	121826536	chr2-101
chr4	47291063	47291361	chr4-117
chr13	97448196	97448494	chr13-90
chr8	28871129	28871427	chr8-170
chr11	102803606	102803904	chr11-225
chr8	61102633	61102931	chr8-221
chr2	84749956	84750254	chr2-237
chr4	129124554	129124852	chr4-269
chr7	40422078	40422376	chr7-162
chr2	102220660	102220958	chr2-256
chr2	157069373	157069671	chr2-264
chr6	115056709	115057007	chr6-182
chr8	122352200	122352498	chr8-339
chr2	146366269	146366567	chr2-260
chr8	22448199	22448497	chr8-304
chr8	96270985	96271283	chr8-385
chr14	26526061	26526359	chr14-150
chr19	44259491	44259789	chr19-71
chr8	31044080	31044378	chr8-405
chr9	97000589	97000887	chr9-263
chr2	166226010	166226308	chr2-401
chr12	52228072	52228370	chr12-180
chr19	10469322	10469620	chr19-94
chr2	71857011	71857309	chr2-378
chr3	84200513	84200811	chr3-242
chr5	136517545	136517843	chr5-281
chr6	86815024	86815322	chr6-275
chr6	112899676	112899974	chr6-286
chr7	79276159	79276457	chr7-289
chr8	25694760	25695058	chr8-640
chr9	110057253	110057551	chr9-323
chr13	6583542	6583840	chr13-224
chr13	23458654	23458952	chr13-234
chr13	51304709	51305007	chr13-208
chr1	3301494	3301792	chr1-397
chr7	82356913	82357211	chr7-329
chr9	60625871	60626169	chr9-278
chr9	73590895	73591193	chr9-365
chr10	92557081	92557379	chr10-307
chr15	12697829	12698127	chr15-216
chr18	34721801	34722099	chr18-3
chr18	35811370	35811668	chr18-23
chr14	40957599	40957897	chr14-117
chr13	107672260	107672558	chr13-165
chr12	111851823	111852121	chr12-186
chr1	165584380	165584678	chr1-54
chr1	34183521	34183819	chr1-17
chr10	21936847	21937145	chr10-77
chr4	142376223	142376521	chr4-154
chr13	8849323	8849621	chr13-93
chr13	58068547	58068845	chr13-107
chr18	67322517	67322815	chr18-98
chr8	18310970	18311268	chr8-236
chr10	122919510	122919808	chr10-210
chr10	20023589	20023887	chr10-172
chr17	66277955	66278253	chr17-198
chr19	47407292	47407590	chr19-112
chr6	117662619	117662917	chr6-246
chr7	132281807	132282105	chr7-23
chr13	56687667	56687965	chr13-40
chr9	46998318	46998616	chr9-73
chr5	54253501	54253799	chr5-59
chr15	91802507	91802805	chr15-40
chr10	126641487	126641785	chr10-74
chr11	117316716	117317014	chr11-156
chr7	112553962	112554260	chr7-88
chr15	91022230	91022528	chr15-60
chr5	149612009	149612307	chr5-108
chr3	95027705	95028003	chr3-107
chr14	26480215	26480513	chr14-94
chr4	86263605	86263903	chr4-207
chr2	18907736	18908034	chr2-210
chr11	113600857	113601155	chr11-228
chr8	34451630	34451928	chr8-263
chr11	69321976	69322274	chr11-288
chr1	164563320	164563618	chr1-268
chr9	65914010	65914308	chr9-233
chr10	120686237	120686535	chr10-185
chr4	131060754	131061052	chr4-299
chr5	112239164	112239462	chr5-221
chr10	24084399	24084697	chr10-218
chr15	84299150	84299448	chr15-143
chr2	31735133	31735431	chr2-369
chr2	116884649	116884947	chr2-435
chr8	24653520	24653818	chr8-638
chr8	88251652	88251950	chr8-547
chr8	128260989	128261287	chr8-595
chr9	120155115	120155413	chr9-328
chr10	69701331	69701629	chr10-255
chr13	63951899	63952197	chr13-294
chr17	46467819	46468117	chr17-254
chr1	3100843	3101141	chr1-396
chr2	29855627	29855925	chr2-462
chr5	115942534	115942832	chr5-358
chr6	39072793	39073091	chr6-262
chr6	85018976	85019274	chr6-274
chr8	60878514	60878812	chr8-1006
chr10	37543389	37543687	chr10-339
chr13	59684976	59685274	chr13-54
chr8	104572772	104573070	chr8-1157
chr2	101907556	101907854	chr2-343
chr5	92498688	92498986	chr5-205
chr13	72820427	72820725	chr13-44
chr8	56629230	56629528	chr8-1
chr13	47821360	47821658	chr13-75
chr14	31903047	31903345	chr14-61
chr4	152572261	152572559	chr4-157
chr17	32451185	32451483	chr17-85
chr8	126887613	126887911	chr8-212
chr11	35006386	35006684	chr11-236
chr15	64429631	64429929	chr15-108
chr6	65818235	65818533	chr6-143
chr16	97319701	97319999	chr16-116
chr11	97911330	97911628	chr11-291
chr7	96414678	96414976	chr7-212
chr11	114780222	114780520	chr11-319
chr8	112151131	112151429	chr8-576
chr13	75880487	75880785	chr13-255
chr17	50032032	50032330	chr17-257
chr8	59746352	59746650	chr8-688
chr8	3428499	3428797	chr8-14
chr16	63091408	63091706	chr16-13
chr8	83584867	83585165	chr8-26
chr12	80798324	80798622	chr12-17
chr5	24453379	24453677	chr5-37
chr4	91234918	91235216	chr4-70
chr9	42828054	42828352	chr9-65
chr14	63673103	63673401	chr14-31
chr7	126835948	126836246	chr7-52
chr14	100435149	100435447	chr14-40
chr7	114959851	114960149	chr7-74
chr1	94074288	94074586	chr1-116
chr2	51284946	51285244	chr2-128
chr2	26488874	26489172	chr2-157
chr2	71865022	71865320	chr2-195
chr5	113681185	113681483	chr5-155
chr8	25117860	25118158	chr8-199
chr5	125222754	125223052	chr5-157
chr4	124146168	124146466	chr4-242
chr8	91236985	91237283	chr8-253
chr5	145245301	145245599	chr5-192
chr18	64965010	64965308	chr18-131
chr8	23286036	23286334	chr8-261
chrX	161922684	161922982	chrX-48
chr2	70082600	70082898	chr2-317
chr4	147122292	147122590	chr4-381
chr10	19401268	19401566	chr10-171
chr11	115467194	115467492	chr11-354
chr12	27575635	27575933	chr12-159
chr4	134430445	134430743	chr4-338
chr5	140605274	140605572	chr5-247
chr6	36672402	36672700	chr6-215
chr7	99287260	99287558	chr7-259
chr8	94507531	94507829	chr8-559
chr8	94573015	94573313	chr8-384
chr16	29950853	29951151	chr16-175
chr6	33874597	33874895	chr6-213
chr7	125790719	125791017	chr7-266
chr11	28754201	28754499	chr11-365
chr12	98930086	98930384	chr12-234
chr13	44167134	44167432	chr13-184
chr19	46728117	46728415	chr19-100
chr4	107135743	107136041	chr4-529
chr11	100407377	100407675	chr11-428
chr18	66008001	66008299	chr18-244
chr15	59567947	59568245	chr15-47
chr7	126293171	126293469	chr7-159
chr4	59825716	59826014	chr4-289
chr19	10242841	10243139	chr19-105
chr16	44283006	44283304	chr16-100
chr1	172071572	172071870	chr1-55
chr11	114807002	114807300	chr11-111
chr5	14044050	14044348	chr5-56
chr8	71526619	71526917	chr8-163
chr16	43814848	43815146	chr16-76
chr11	80292410	80292708	chr11-257
chr11	98034850	98035148	chr11-280
chr1	181832735	181833033	chr1-274
chr17	27315049	27315347	chr17-146
chr8	61775696	61775994	chr8-364
chr2	146664522	146664820	chr2-350
chr7	4924799	4925097	chr7-242
chr17	74121018	74121316	chr17-262
chr2	30692135	30692433	chr2-463
chr4	84858801	84859099	chr4-512
chr11	69362021	69362319	chr11-82
chr13	52133019	52133317	chr13-38
chr12	70422804	70423102	chr12-29
chr11	61550698	61550996	chr11-127
chr7	118889085	118889383	chr7-70
chr1	35953786	35954084	chr1-112
chr4	140187834	140188132	chr4-146
chr11	51420263	51420561	chr11-192
chr6	40203727	40204025	chr6-108
chr8	47737133	47737431	chr8-173
chr1	178489192	178489490	chr1-165
chr5	24657197	24657495	chr5-129
chr5	114284610	114284908	chr5-124
chr5	113480509	113480807	chr5-169
chr7	110952927	110953225	chr7-139
chr9	121067103	121067401	chr9-172
chr2	170811447	170811745	chr2-244
chr2	58711574	58711872	chr2-277
chr6	7885215	7885513	chr6-151
chr6	84534928	84535226	chr6-128
chr14	62425137	62425435	chr14-142
chr3	102081438	102081736	chr3-196
chr8	26574920	26575218	chr8-347
chr8	32991046	32991344	chr8-407
chr8	48092320	48092618	chr8-420
chr9	58443088	58443386	chr9-207
chr15	48764923	48765221	chr15-139
chr16	95875167	95875465	chr16-134
chr9	64504851	64505149	chr9-255
chr13	97046809	97047107	chr13-217
chr4	133482028	133482326	chr4-469
chr5	116700878	116701176	chr5-273
chr7	112722329	112722627	chr7-299
chr8	93238964	93239262	chr8-555
chr10	77853396	77853694	chr10-293
chr10	84816024	84816322	chr10-300
chr11	5414881	5415179	chr11-396
chr11	76255729	76256027	chr11-425
chr15	97000419	97000717	chr15-201
chr16	24257801	24258099	chr16-207
chr1	134512664	134512962	chr1-494
chr3	3135617	3135915	chr3-258
chr5	67149286	67149584	chr5-345
chr6	34895572	34895870	chr6-231
chr6	97022585	97022883	chr6-281
chr7	63769623	63769921	chr7-322
chr8	111760628	111760926	chr8-1194
chr11	10946100	10946398	chr11-397
chr15	93010536	93010834	chr15-240
chr18	6060306	6060604	chr18-189
chr3	27348509	27348807	chr3-20
chr11	117978023	117978321	chr11-99
chr1	72712632	72712930	chr1-125
chr5	148453834	148454132	chr5-42
chr19	41744603	41744901	chr19-70
chr8	84724652	84724950	chr8-319
chr4	131876404	131876702	chr4-466
chr17	28388574	28388872	chr17-14
chr10	57675840	57676138	chr10-24
chr11	120261987	120262285	chr11-188
chr2	29843506	29843804	chr2-171
chr11	76052535	76052833	chr11-210
chr2	166024647	166024945	chr2-208
chr15	72714195	72714493	chr15-96
chr2	38578832	38579130	chr2-309
chr7	139319204	139319502	chr7-239
chr16	33687847	33688145	chr16-177
chr1	172047279	172047577	chr1-436
chr2	161578504	161578802	chr2-445
chr19	33110007	33110305	chr19-86
chr2	167299460	167299758	chr2-523
chr8	106558370	106558668	chr8-1168
chr15	97989492	97989790	chr15-203
chr3	87789861	87790159	chr3-15
chr6	5280572	5280870	chr6-20
chr4	46069831	46070129	chr4-41
chr5	116280485	116280783	chr5-34
chr18	60764920	60765218	chr18-31
chr2	156233718	156234016	chr2-95
chr7	110103898	110104196	chr7-73
chr4	73524626	73524924	chr4-130
chr4	109160970	109161268	chr4-145
chr1	34155320	34155618	chr1-122
chr11	61453199	61453497	chr11-168
chr7	144096063	144096361	chr7-132
chr8	125735531	125735829	chr8-194
chr11	69866328	69866626	chr11-174
chr2	180165913	180166211	chr2-222
chr5	72838917	72839215	chr5-131
chr12	112206728	112207026	chr12-107
chr13	56698369	56698667	chr13-115
chr2	6667703	6668001	chr2-247
chr2	73484141	73484439	chr2-251
chr2	165868726	165869024	chr2-267
chr3	9773167	9773465	chr3-150
chr7	34459812	34460110	chr7-173
chr1	11016989	11017287	chr1-277
chr7	144811510	144811808	chr7-220
chr9	96235511	96235809	chr9-237
chr14	68945535	68945833	chr14-144
chr3	152228880	152229178	chr3-229
chr4	153791144	153791442	chr4-385
chr5	29679999	29680297	chr5-217
chr8	45801306	45801604	chr8-418
chr9	58613779	58614077	chr9-228
chr9	60398123	60398421	chr9-231
chr14	21533595	21533893	chr14-149
chr14	78254702	78255000	chr14-158
chr3	88624359	88624657	chr3-246
chr3	145451350	145451648	chr3-227
chr8	19187246	19187544	chr8-476
chr18	35647931	35648229	chr18-173
chr6	14172820	14173118	chr6-229
chr8	53668067	53668365	chr8-677
chr8	68111073	68111371	chr8-709
chr8	94008806	94009104	chr8-556
chr10	117985345	117985643	chr10-316
chr2	113426371	113426669	chr2-347
chr2	165518200	165518498	chr2-519
chr6	54780044	54780342	chr6-319
chr6	85968311	85968609	chr6-330
chr8	126561912	126562210	chr8-1230
chr11	19899702	19900000	chr11-399
chr11	53025798	53026096	chr11-408
chr11	58094822	58095120	chr11-308
chr8	92136504	92136802	chr8-207
chr8	87475491	87475789	chr8-546
chr4	128886723	128887021	chr4-69
chr11	85774111	85774409	chr11-258
chr8	120214003	120214301	chr8-257
chr1	156963902	156964200	chr1-35
chr4	124649651	124649949	chr4-68
chr13	97439509	97439807	chr13-41
chr17	29884684	29884982	chr17-42
chr11	65838934	65839232	chr11-194
chr8	110942600	110942898	chr8-193
chr1	74797506	74797804	chr1-182
chr5	126061197	126061495	chr5-225
chr14	13212862	13213160	chr14-163
chr1	91483712	91484010	chr1-376
chr8	87596299	87596597	chr8-751
chr8	120210786	120211084	chr8-817
chr11	104163679	104163977	chr11-434
chr2	130877453	130877751	chr2-509
chr8	83176814	83177112	chr8-8
chr17	29680226	29680524	chr17-11
chr11	55582188	55582486	chr11-86
chr8	10173383	10173681	chr8-67
chr9	65514742	65515040	chr9-68
chr10	85421357	85421655	chr10-59
chr13	44455639	44455937	chr13-66
chr16	36698420	36698718	chr16-64
chr1	93267270	93267568	chr1-133
chr3	30528916	30529214	chr3-70
chr2	32624383	32624681	chr2-132
chr9	96859000	96859298	chr9-125
chr11	113308626	113308924	chr11-170
chr11	20853995	20854293	chr11-165
chr14	65641926	65642224	chr14-86
chr11	53505065	53505363	chr11-180
chr19	4863072	4863370	chr19-50
chr2	70363645	70363943	chr2-214
chr3	67946951	67947249	chr3-121
chr8	95289070	95289368	chr8-226
chr6	54641923	54642221	chr6-125
chr8	45946786	45947084	chr8-172
chr9	54750235	54750533	chr9-164
chr11	99047799	99048097	chr11-244
chr1	7023853	7024151	chr1-206
chr17	7292036	7292334	chr17-122
chr6	137166303	137166601	chr6-150
chr4	128898021	128898319	chr4-336
chr5	73787242	73787540	chr5-202
chr8	47624495	47624793	chr8-267
chr8	122021710	122022008	chr8-394
chr6	136260297	136260595	chr6-206
chr8	37128915	37129213	chr8-412
chr15	89275522	89275820	chr15-131
chr3	21818883	21819181	chr3-182
chr7	30009729	30010027	chr7-222
chr11	101045907	101046205	chr11-350
chr11	112481592	112481890	chr11-389
chr2	165206401	165206699	chr2-400
chr4	148982338	148982636	chr4-480
chr9	115614053	115614351	chr9-326
chr13	48146958	48147256	chr13-246
chr19	7128761	7129059	chr19-118
chr1	92160695	92160993	chr1-485
chr2	69508569	69508867	chr2-482
chr5	137086949	137087247	chr5-376
chr6	91658366	91658664	chr6-331
chr13	44541334	44541632	chr13-330
chr11	114404575	114404873	chr11-285
chr8	18566945	18567243	chr8-474
chr4	85257924	85258222	chr4-450
chr9	15286260	15286558	chr9-113
chr1	177445423	177445721	chr1-36
chr5	117689873	117690171	chr5-25
chr19	35175917	35176215	chr19-25
chr13	57317727	57318025	chr13-64
chr12	72304242	72304540	chr12-121
chr8	68625102	68625400	chr8-366
chr11	45398278	45398576	chr11-304
chr2	102622322	102622620	chr2-383
chr7	57933186	57933484	chr7-250
chr4	87004615	87004913	chr4-42
chr13	95774928	95775226	chr13-34
chr4	130721420	130721718	chr4-73
chr14	19701600	19701898	chr14-32
chr2	4579909	4580207	chr2-71
chr19	3422542	3422840	chr19-18
chr1	188682032	188682330	chr1-89
chr7	99788663	99788961	chr7-69
chr4	153883871	153884169	chr4-140
chr11	62386989	62387287	chr11-193
chr8	101745036	101745334	chr8-208
chr17	27642547	27642845	chr17-148
chr3	87093822	87094120	chr3-172
chr8	93205667	93205965	chr8-382
chr19	29862843	29863141	chr19-85
chr6	117157510	117157808	chr6-204
chr11	101999556	101999854	chr11-293
chr15	78515122	78515420	chr15-155
chr2	23722015	23722313	chr2-367
chr11	53754641	53754939	chr11-371
chr1	182250671	182250969	chr1-441
chr6	114795990	114796288	chr6-288
chr8	3559847	3560145	chr8-464
chr8	121919732	121920030	chr8-823
chr2	163976427	163976725	chr2-518
chr5	114962011	114962309	chr5-357
chr14	64318937	64319235	chr14-249
chr4	108636850	108637148	chr4-404
chr13	97572247	97572545	chr13-300
chr11	77934972	77935270	chr11-137
chr18	77046145	77046443	chr18-99
chr8	84835072	84835370	chr8-276
chr14	64300638	64300936	chr14-23
chr10	37101867	37102165	chr10-33
chr12	57949893	57950191	chr12-28
chr4	124280173	124280471	chr4-209
chr8	107877286	107877584	chr8-180
chr11	119981721	119982019	chr11-267
chr12	100411159	100411457	chr12-139
chr8	85016111	85016409	chr8-321
chr13	97550277	97550575	chr13-160
chr6	37465806	37466104	chr6-153
chr8	25750212	25750510	chr8-346
chr18	34108682	34108980	chr18-139
chr2	36098214	36098512	chr2-371
chr8	121906545	121906843	chr8-588
chr8	80649144	80649442	chr8-737
chr8	88623434	88623732	chr8-548
chr7	144610789	144611087	chr7-304
chr8	23659021	23659319	chr8-40
chr16	13428925	13429223	chr16-23
chr16	21859006	21859304	chr16-44
chr1	82261295	82261593	chr1-81
chr8	70801191	70801489	chr8-80
chr6	67200961	67201259	chr6-73
chr9	63058500	63058798	chr9-103
chr10	77700772	77701070	chr10-84
chr2	42968760	42969058	chr2-189
chr7	57330280	57330578	chr7-146
chr5	35141464	35141762	chr5-147
chr9	45560935	45561233	chr9-162
chr17	87272535	87272833	chr17-121
chr6	30182054	30182352	chr6-138
chr8	45548357	45548655	chr8-245
chr11	57034641	57034939	chr11-251
chr13	25479729	25480027	chr13-122
chr7	40928289	40928587	chr7-153
chr17	33087033	33087331	chr17-124
chr4	62398024	62398322	chr4-261
chr7	125694172	125694470	chr7-194
chr8	47792801	47793099	chr8-268
chr11	99814998	99815296	chr11-281
chr13	99549653	99549951	chr13-161
chr3	54064148	54064446	chr3-154
chr4	20447720	20448018	chr4-287
chr7	82203896	82204194	chr7-211
chr6	89054186	89054484	chr6-203
chr12	9208343	9208641	chr12-174
chr14	74882765	74883063	chr14-155
chr17	6182792	6183090	chr17-177
chr1	55334749	55335047	chr1-364
chr8	119754582	119754880	chr8-392
chr9	45534707	45535005	chr9-250
chr9	66475180	66475478	chr9-234
chr14	77004626	77004924	chr14-186
chr8	36075423	36075721	chr8-491
chr8	71435566	71435864	chr8-527
chr12	11076539	11076837	chr12-195
chr5	72671075	72671373	chr5-301
chr8	62530545	62530843	chr8-505
chr8	64885021	64885319	chr8-1017
chr8	72076171	72076469	chr8-1038
chr10	60965607	60965905	chr10-290
chr14	24250479	24250777	chr14-226
chr8	69834040	69834338	chr8-712
chr17	46284707	46285005	chr17-17
chr6	91839278	91839576	chr6-34
chr5	116572093	116572391	chr5-104
chr15	85201058	85201356	chr15-158
chr15	37138278	37138576	chr15-170
chr2	32064868	32065166	chr2-412
chr7	144040007	144040305	chr7-240
chr2	120051341	120051639	chr2-503
chr8	120007842	120008140	chr8-582
chr7	126008877	126009175	chr7-34
chr1	191524789	191525087	chr1-71
chr3	9839962	9840260	chr3-50
chr12	8510946	8511244	chr12-49
chr14	22040126	22040424	chr14-84
chr18	33425736	33426034	chr18-74
chr5	113041654	113041952	chr5-154
chr7	130826395	130826693	chr7-160
chr12	106597528	106597826	chr12-126
chr4	56963740	56964038	chr4-259
chr10	21745935	21746233	chr10-142
chr15	39876465	39876763	chr15-128
chr16	32154424	32154722	chr16-111
chr6	35079653	35079951	chr6-195
chr7	57206200	57206498	chr7-208
chr8	49138499	49138797	chr8-361
chr8	77416865	77417163	chr8-531
chr10	127309166	127309464	chr10-322
chr13	51023806	51024104	chr13-248
chr15	101065194	101065492	chr15-160
chr16	8420403	8420701	chr16-171
chr18	77156812	77157110	chr18-186
chr1	153872189	153872487	chr1-430
chr3	30228117	30228415	chr3-308
chr4	77171861	77172159	chr4-509
chr6	52101311	52101609	chr6-315
chr8	52729821	52730119	chr8-976
chr10	86097773	86098071	chr10-302
chr16	12880603	12880901	chr16-201
chr19	46038586	46038884	chr19-62
chr1	186979541	186979839	chr1-307
chr13	113034280	113034578	chr13-18
chr7	45157454	45157752	chr7-175
chr2	28539212	28539510	chr2-92
chr5	118033213	118033511	chr5-171
chr4	82416029	82416327	chr4-291
chr3	102026286	102026584	chr3-220
chr10	84467635	84467933	chr10-298
chr17	75770335	75770633	chr17-263
chr15	99054050	99054348	chr15-184
chr18	53490711	53491009	chr18-205
chr12	72233457	72233755	chr12-43
chr12	99466454	99466752	chr12-86
chr5	37468331	37468629	chr5-148
chr7	126027497	126027795	chr7-168
chr2	171777309	171777607	chr2-245
chr9	64204744	64205042	chr9-190
chr18	75838752	75839050	chr18-119
chr1	151984102	151984400	chr1-265
chr4	117040708	117041006	chr4-267
chr8	125360594	125360892	chr8-459
chr16	29826896	29827194	chr16-156
chr4	136253531	136253829	chr4-373
chr8	119851332	119851630	chr8-814
chr7	99386080	99386378	chr7-296
chr14	24890772	24891070	chr14-227
chr16	9130089	9130387	chr16-172
chr17	25714063	25714361	chr17-280
chr19	15214544	15214842	chr19-142
chrX	99363758	99364056	chrX-73
chr4	102257432	102257730	chr4-454
chr9	66061115	66061413	chr9-140
chr8	111770972	111771270	chr8-150
chr8	83854699	83854997	chr8-746
chr11	76311653	76311951	chr11-339
chr9	35379513	35379811	chr9-39
chr6	48876546	48876844	chr6-67
chr10	127143255	127143553	chr10-75
chr9	10226160	10226458	chr9-146
chr7	73407009	73407307	chr7-209
chr11	97275929	97276227	chr11-347
chr2	165114671	165114969	chr2-399
chr8	120374466	120374764	chr8-456
chr17	31291732	31292030	chr17-186
chr12	112440057	112440355	chr12-57
chr2	177317645	177317943	chr2-299
chr9	10216490	10216788	chr9-199
chr2	179392045	179392343	chr2-406
chr1	184056453	184056751	chr1-395
chr7	121938192	121938490	chr7-301
chr11	70043077	70043375	chr11-338
chr1	181552532	181552830	chr1-516
chr17	28825464	28825762	chr17-243
chr8	10680457	10680755	chr8-25
chr6	67048118	67048416	chr6-100
chr2	30539429	30539727	chr2-141
chr3	37875823	37876121	chr3-103
chr7	132431228	132431526	chr7-114
chr3	71899425	71899723	chr3-143
chr8	106793480	106793778	chr8-788
chr19	27454982	27455280	chr19-126
chr8	125959477	125959775	chr8-128
chr6	38495725	38496023	chr6-88
chr8	83464588	83464886	chr8-439
chr8	81992114	81992412	chr8-742
chr5	102072067	102072365	chr5-183
chr2	153033600	153033898	chr2-217
chr9	44597838	44598136	chr9-152
chr13	59648622	59648920	chr13-116
chr8	35121709	35122007	chr8-354
chr11	60107779	60108077	chr11-335
chr11	69414800	69415098	chr11-375
chr18	34119413	34119711	chr18-55
chr4	14175624	14175922	chr4-80
chr11	6481677	6481975	chr11-112
chr10	111669683	111669981	chr10-51
chr3	141251542	141251840	chr3-65
chr8	89744335	89744633	chr8-123
chr19	27317385	27317683	chr19-36
chr14	12103275	12103573	chr14-73
chr18	5446344	5446642	chr18-60
chr17	8205351	8205649	chr17-82
chr7	125954500	125954798	chr7-130
chr8	46251646	46251944	chr8-200
chr14	55518814	55519112	chr14-107
chr3	102024417	102024715	chr3-145
chr7	30812463	30812761	chr7-205
chr10	13150500	13150798	chr10-191
chr11	116127994	116128292	chr11-390
chr16	35473973	35474271	chr16-178
chr3	100187951	100188249	chr3-338
chr9	21576296	21576594	chr9-335
chr12	106112350	106112648	chr12-275
chr15	94006036	94006334	chr15-117
chr2	72781752	72782050	chr2-485
chr13	55819912	55820210	chr13-338
chr3	27327712	27328010	chr3-69
chr12	25111871	25112169	chr12-216
chr11	75940012	75940310	chr11-97
chr2	27107031	27107329	chr2-74
chr17	25668502	25668800	chr17-48
chr2	92075991	92076289	chr2-100
chr6	149442956	149443254	chr6-57
chr8	123881673	123881971	chr8-100
chr5	139093592	139093890	chr5-74
chr2	153020596	153020894	chr2-124
chr17	83115244	83115542	chr17-61
chr8	36125935	36126233	chr8-119
chr9	57598144	57598442	chr9-93
chr9	55083478	55083776	chr9-106
chr1	132569641	132569939	chr1-160
chr3	146368976	146369274	chr3-95
chr10	61308721	61309019	chr10-87
chr11	57033706	57034004	chr11-181
chr11	5468494	5468792	chr11-189
chr14	38122685	38122983	chr14-90
chr19	53084695	53084993	chr19-45
chr5	148455017	148455315	chr5-161
chr10	21959291	21959589	chr10-133
chr14	101912059	101912357	chr14-95
chr15	74647677	74647975	chr15-87
chr17	31418562	31418860	chr17-115
chr19	14701208	14701506	chr19-54
chr8	127055082	127055380	chr8-292
chr15	99607641	99607939	chr15-118
chr8	123114154	123114452	chr8-340
chr2	166451081	166451379	chr2-296
chr6	34730469	34730767	chr6-172
chr14	65274893	65275191	chr14-125
chr15	75658643	75658941	chr15-129
chr3	22017037	22017335	chr3-208
chr7	101191694	101191992	chr7-229
chr8	61767971	61768269	chr8-424
chr9	40412250	40412548	chr9-226
chr11	5892817	5893115	chr11-324
chr11	99200978	99201276	chr11-316
chr17	35111607	35111905	chr17-191
chr17	85366645	85366943	chr17-164
chr7	134193039	134193337	chr7-196
chr14	32368351	32368649	chr14-164
chr1	88891050	88891348	chr1-375
chr5	103954657	103954955	chr5-310
chr8	34920478	34920776	chr8-652
chr8	65715460	65715758	chr8-515
chr8	80702900	80703198	chr8-739
chr8	94044522	94044820	chr8-772
chr10	94129673	94129971	chr10-259
chr11	96885979	96886277	chr11-346
chr13	57263146	57263444	chr13-191
chr15	101396933	101397231	chr15-145
chr2	181554427	181554725	chr2-452
chr3	29260066	29260364	chr3-268
chr4	119161371	119161669	chr4-534
chr5	22119361	22119659	chr5-332
chr6	38393770	38394068	chr6-308
chr8	38361654	38361952	chr8-927
chr8	107845823	107846121	chr8-1175
chr9	123948166	123948464	chr9-386
chr14	64233434	64233732	chr14-248
chr15	38941911	38942209	chr15-224
chr15	87199607	87199905	chr15-198
chr17	22656785	22657083	chr17-235
chr18	13763386	13763684	chr18-227
chr19	47291207	47291505	chr19-44
chr13	21695272	21695570	chr13-103
chr6	84964799	84965097	chr6-117
chr18	61470321	61470619	chr18-49
chr5	122978263	122978561	chr5-89
chr18	34706162	34706460	chr18-83
chr9	108686672	108686970	chr9-132
chr8	106409900	106410198	chr8-227
chr8	35585705	35586003	chr8-242
chr11	102383420	102383718	chr11-352
chr6	127213463	127213761	chr6-251
chr7	128567926	128568224	chr7-268
chr3	34629487	34629785	chr3-234
chr8	23328104	23328402	chr8-635
chr8	26406186	26406484	chr8-643
chr18	53540904	53541202	chr18-206
chr1	128205286	128205584	chr1-380
chr2	93397206	93397504	chr2-431
chr8	12465105	12465403	chr8-849
chr9	22206073	22206371	chr9-336
chr9	25865740	25866038	chr9-268
chr10	90001349	90001647	chr10-306
chr8	40473882	40474180	chr8-413
chr13	97554421	97554719	chr13-111
chr2	65929296	65929594	chr2-316
chr8	96789612	96789910	chr8-451
chr13	28793195	28793493	chr13-203
chr8	127107943	127108241	chr8-39
chr13	34816534	34816832	chr13-47
chr2	180262560	180262858	chr2-300
chr11	32959088	32959386	chr11-404
