# Supplementary material for: Intrinsic DNA binding properties demonstrated for lineage-specifying basic helix-loop-helix transcription factors
Source: HighWire-hosted journal article supplement (doi:10.1101/gr.224360.117), 2018-03-02
Supplement: Supplemental_Table_S5.xlsx [file Supplemental_Table_S5.xlsx]

## Sheet: Legend
Legend:
Attached sheets contain bHLH peaks with ebox motif annotations
Annotation was performed by using ebox motif identified from de novo motif analysis on open and closed peaks
Peaks that do not have CAGSTG ebox in 50bp around the center were exluded from the analysis

## Sheet: ASCL1_open
PeakID	Chr	Start	End	CAGCTG Distance From Peak(sequence,strand,conservation)	CAGGTG Distance From Peak(sequence,strand,conservation)	CACCTG Distance From Peak(sequence,strand,conservation)
chr1-4	chr1	190448308	190448608		0(CAGGTG,+,0.00),38(CAGGTG,+,0.00),49(CAGGTG,+,0.00)
chr14-8	chr14	122255491	122255791	0(CAGCTG,+,0.00)		-31(CACCTG,+,0.00)
chr2-11	chr2	152804339	152804639	-147(CAGCTG,+,0.00),0(CAGCTG,+,0.00),30(CAGCTG,+,0.00)	-42(CAGGTG,+,0.00)	-63(CACCTG,+,0.00)
chr6-6	chr6	83421925	83422225		-34(CAGGTG,+,0.00),0(CAGGTG,+,0.00)	-21(CACCTG,+,0.00)
chr9-19	chr9	108567094	108567394	0(CAGCTG,+,0.00)		-103(CACCTG,+,0.00),8(CACCTG,+,0.00),27(CACCTG,+,0.00)
chr15-8	chr15	8568658	8568958	0(CAGCTG,+,0.00)		-10(CACCTG,+,0.00)
chr8-7	chr8	69176368	69176668	0(CAGCTG,+,0.00),34(CAGCTG,+,0.00)		-43(CACCTG,+,0.00),126(CACCTG,+,0.00)
chr2-16	chr2	154427821	154428121	8(CAGCTG,+,0.00),90(CAGCTG,+,0.00)	0(CAGGTG,+,0.00)	-25(CACCTG,+,0.00)
chr9-23	chr9	120011245	120011545		0(CAGGTG,+,0.00),12(CAGGTG,+,0.00),24(CAGGTG,+,0.00)
chr7-7	chr7	75914041	75914341	-55(CAGCTG,+,0.00),-43(CAGCTG,+,0.00),0(CAGCTG,+,0.00)
chr10-5	chr10	8287325	8287625	-76(CAGCTG,+,0.00),0(CAGCTG,+,0.00),47(CAGCTG,+,0.00)	54(CAGGTG,+,0.00)	-33(CACCTG,+,0.00),72(CACCTG,+,0.00)
chr1-12	chr1	91414103	91414403	-49(CAGCTG,+,0.00)	0(CAGGTG,+,0.00)
chr2-21	chr2	112676765	112677065	0(CAGCTG,+,0.00),103(CAGCTG,+,0.00)
chr14-11	chr14	78288859	78289159	0(CAGCTG,+,0.00)	-31(CAGGTG,+,0.00)
chr12-8	chr12	28817373	28817673	0(CAGCTG,+,0.00),61(CAGCTG,+,0.00)	-141(CAGGTG,+,0.00)	-108(CACCTG,+,0.00)
chr8-12	chr8	89003390	89003690	-18(CAGCTG,+,0.00),0(CAGCTG,+,0.00)	-124(CAGGTG,+,0.00)
chr6-7	chr6	142511564	142511864	-26(CAGCTG,+,0.00),0(CAGCTG,+,0.00),95(CAGCTG,+,0.00)	68(CAGGTG,+,0.00)
chr18-5	chr18	82477275	82477575	-18(CAGCTG,+,0.00)	0(CAGGTG,+,0.00)
chr2-24	chr2	84837151	84837451	0(CAGCTG,+,0.00)		28(CACCTG,+,0.00)
chr14-12	chr14	122267615	122267915		0(CAGGTG,+,0.00)	-115(CACCTG,+,0.00),-45(CACCTG,+,0.00),11(CACCTG,+,0.00)
chr6-8	chr6	38730495	38730795	0(CAGCTG,+,0.00)		-25(CACCTG,+,0.00)
chr5-9	chr5	128439867	128440167	-66(CAGCTG,+,0.00),-53(CAGCTG,+,0.00)	0(CAGGTG,+,0.00)	68(CACCTG,+,0.00)
chr7-14	chr7	49071244	49071544	-80(CAGCTG,+,0.00),68(CAGCTG,+,0.00)	0(CAGGTG,+,0.00)
chr2-27	chr2	105263264	105263564	0(CAGCTG,+,0.00)	30(CAGGTG,+,0.00)
chr7-13	chr7	37466937	37467237	-26(CAGCTG,+,0.00)	0(CAGGTG,+,0.00)	22(CACCTG,+,0.00),95(CACCTG,+,0.00)
chr17-26	chr17	52601246	52601546		-102(CAGGTG,+,0.00),-61(CAGGTG,+,0.00),0(CAGGTG,+,0.00)
chr17-27	chr17	66479776	66480076	0(CAGCTG,+,0.00)
chr4-22	chr4	153806264	153806564		-17(CAGGTG,+,0.00),0(CAGGTG,+,0.00)
chr9-41	chr9	37054186	37054486	0(CAGCTG,+,0.00),11(CAGCTG,+,0.00)
chr7-16	chr7	16944420	16944720	-30(CAGCTG,+,0.00),0(CAGCTG,+,0.00)		-48(CACCTG,+,0.00)
chr14-14	chr14	45507083	45507383	-43(CAGCTG,+,0.00),31(CAGCTG,+,0.00)	0(CAGGTG,+,0.00)
chr13-11	chr13	9329398	9329698	0(CAGCTG,+,0.00),41(CAGCTG,+,0.00)
chr4-24	chr4	13300177	13300477	-61(CAGCTG,+,0.00),82(CAGCTG,+,0.00)	0(CAGGTG,+,0.00)
chr3-13	chr3	129918456	129918756	0(CAGCTG,+,0.00)	18(CAGGTG,+,0.00)	-12(CACCTG,+,0.00)
chr3-12	chr3	75164858	75165158	0(CAGCTG,+,0.00)		-53(CACCTG,+,0.00),-18(CACCTG,+,0.00),111(CACCTG,+,0.00)
chr8-17	chr8	69121492	69121792	0(CAGCTG,+,0.00),125(CAGCTG,+,0.00)		87(CACCTG,+,0.00)
chr4-26	chr4	142234919	142235219		-98(CAGGTG,+,0.00),0(CAGGTG,+,0.00)	-12(CACCTG,+,0.00)
chr1-17	chr1	54484924	54485224	-37(CAGCTG,+,0.00),0(CAGCTG,+,0.00)
chr13-13	chr13	3642094	3642394	0(CAGCTG,+,0.00),13(CAGCTG,+,0.00),109(CAGCTG,+,0.00)		-11(CACCTG,+,0.00)
chr7-19	chr7	19363899	19364199	-40(CAGCTG,+,0.00)	0(CAGGTG,+,0.00)
chr8-19	chr8	106619513	106619813	0(CAGCTG,+,0.00)	-30(CAGGTG,+,0.00)
chr14-16	chr14	24253912	24254212	-11(CAGCTG,+,0.00),0(CAGCTG,+,0.00),101(CAGCTG,+,0.00)
chr15-16	chr15	103215221	103215521	-22(CAGCTG,+,0.00),0(CAGCTG,+,0.00)
chr6-13	chr6	72794870	72795170	0(CAGCTG,+,0.00)	-21(CAGGTG,+,0.00)
chr16-14	chr16	17276191	17276491	-9(CAGCTG,+,0.00),0(CAGCTG,+,0.00)	125(CAGGTG,+,0.00)
chr19-11	chr19	47019336	47019636	0(CAGCTG,+,0.00),53(CAGCTG,+,0.00)
chr15-18	chr15	38519298	38519598		0(CAGGTG,+,0.00)
chr17-36	chr17	17739914	17740214		0(CAGGTG,+,0.00),28(CAGGTG,+,0.00)
chr13-17	chr13	66715736	66716036		0(CAGGTG,+,0.00)	-29(CACCTG,+,0.00)
chr9-51	chr9	8035582	8035882	-75(CAGCTG,+,0.00),0(CAGCTG,+,0.00)
chr14-19	chr14	28958630	28958930	-86(CAGCTG,+,0.00),0(CAGCTG,+,0.00),17(CAGCTG,+,0.00)	-147(CAGGTG,+,0.00)
chr13-16	chr13	38109117	38109417		0(CAGGTG,+,0.00)
chr1-25	chr1	59697773	59698073	0(CAGCTG,+,0.00)	-44(CAGGTG,+,0.00)
chr10-22	chr10	47631593	47631893	0(CAGCTG,+,0.00)	-114(CAGGTG,+,0.00)	-26(CACCTG,+,0.00)
chr12-17	chr12	40917473	40917773	0(CAGCTG,+,0.00)	15(CAGGTG,+,0.00),96(CAGGTG,+,0.00)	-112(CACCTG,+,0.00),89(CACCTG,+,0.00)
chr7-25	chr7	80746415	80746715	-96(CAGCTG,+,0.00),130(CAGCTG,+,0.00)	-104(CAGGTG,+,0.00),0(CAGGTG,+,0.00)
chr6-15	chr6	113038546	113038846	-22(CAGCTG,+,0.00)	0(CAGGTG,+,0.00),53(CAGGTG,+,0.00)
chr10-26	chr10	115184823	115185123	0(CAGCTG,+,0.00)
chr10-25	chr10	13641792	13642092		-51(CAGGTG,+,0.00),-15(CAGGTG,+,0.00),0(CAGGTG,+,0.00)
chr11-87	chr11	40050583	40050883		-31(CAGGTG,+,0.00),0(CAGGTG,+,0.00)
chr4-32	chr4	130519878	130520178		0(CAGGTG,+,0.00)	-16(CACCTG,+,0.00)
chr17-38	chr17	57070783	57071083	0(CAGCTG,+,0.00)	12(CAGGTG,+,0.00)
chr8-21	chr8	122460654	122460954		-96(CAGGTG,+,0.00),0(CAGGTG,+,0.00)
chr2-46	chr2	68364195	68364495	-63(CAGCTG,+,0.00),-53(CAGCTG,+,0.00),0(CAGCTG,+,0.00)		-21(CACCTG,+,0.00)
chr6-16	chr6	120580160	120580460	-120(CAGCTG,+,0.00),24(CAGCTG,+,0.00),72(CAGCTG,+,0.00)	0(CAGGTG,+,0.00)
chr11-102	chr11	20145433	20145733		0(CAGGTG,+,0.00),45(CAGGTG,+,0.00)
chr3-18	chr3	22156381	22156681	-15(CAGCTG,+,0.00)	0(CAGGTG,+,0.00)
chr5-21	chr5	38656300	38656600		0(CAGGTG,+,0.00),18(CAGGTG,+,0.00)
chr13-19	chr13	54215999	54216299	0(CAGCTG,+,0.00)		62(CACCTG,+,0.00)
chr17-37	chr17	28224034	28224334	-18(CAGCTG,+,0.00)	0(CAGGTG,+,0.00)
chr8-28	chr8	108715237	108715537		-59(CAGGTG,+,0.00),0(CAGGTG,+,0.00)
chr5-26	chr5	135001300	135001600	-129(CAGCTG,+,0.00)	0(CAGGTG,+,0.00),35(CAGGTG,+,0.00)
chr18-12	chr18	54576677	54576977		0(CAGGTG,+,0.00)
chr6-21	chr6	143162248	143162548	0(CAGCTG,+,0.00)		-37(CACCTG,+,0.00)
chr17-40	chr17	42876599	42876899	0(CAGCTG,+,0.00),99(CAGCTG,+,0.00)	10(CAGGTG,+,0.00),52(CAGGTG,+,0.00)
chr12-20	chr12	86466262	86466562	13(CAGCTG,+,0.00)	0(CAGGTG,+,0.00)
chr13-21	chr13	64152241	64152541		0(CAGGTG,+,0.00)
chr12-21	chr12	113140276	113140576	0(CAGCTG,+,0.00)	-26(CAGGTG,+,0.00)
chr2-48	chr2	154426619	154426919	-26(CAGCTG,+,0.00),0(CAGCTG,+,0.00),109(CAGCTG,+,0.00)
chr1-30	chr1	146426943	146427243	0(CAGCTG,+,0.00),97(CAGCTG,+,0.00)		91(CACCTG,+,0.00)
chr10-28	chr10	25708038	25708338	0(CAGCTG,+,0.00)	-69(CAGGTG,+,0.00)	79(CACCTG,+,0.00)
chr8-27	chr8	94186571	94186871		0(CAGGTG,+,0.00)	59(CACCTG,+,0.00)
chr11-126	chr11	43653089	43653389	-14(CAGCTG,+,0.00),0(CAGCTG,+,0.00)	105(CAGGTG,+,0.00)
chr4-39	chr4	129113112	129113412	-101(CAGCTG,+,0.00),0(CAGCTG,+,0.00)	-51(CAGGTG,+,0.00)
chr4-41	chr4	155173539	155173839	-73(CAGCTG,+,0.00),0(CAGCTG,+,0.00)
chr6-22	chr6	149131127	149131427	-67(CAGCTG,+,0.00)	0(CAGGTG,+,0.00)
chr2-56	chr2	181188792	181189092	0(CAGCTG,+,0.00)		-11(CACCTG,+,0.00)
chr17-44	chr17	33817555	33817855	0(CAGCTG,+,0.00)		-93(CACCTG,+,0.00)
chr1-33	chr1	59422919	59423219	0(CAGCTG,+,0.00)
chr4-35	chr4	80911954	80912254	-81(CAGCTG,+,0.00),-6(CAGCTG,+,0.00),0(CAGCTG,+,0.00),36(CAGCTG,+,0.00)	115(CAGGTG,+,0.00)
chr5-27	chr5	60700038	60700338		0(CAGGTG,+,0.00)	39(CACCTG,+,0.00)
chr4-38	chr4	117131945	117132245	-104(CAGCTG,+,0.00),-96(CAGCTG,+,0.00),-67(CAGCTG,+,0.00),0(CAGCTG,+,0.00)
chr6-23	chr6	125592083	125592383	34(CAGCTG,+,0.00)	0(CAGGTG,+,0.00)
chr3-22	chr3	108856874	108857174		0(CAGGTG,+,0.00)	-115(CACCTG,+,0.00),12(CACCTG,+,0.00)
chr11-120	chr11	73036849	73037149		0(CAGGTG,+,0.00)
chr3-25	chr3	86223568	86223868	-114(CAGCTG,+,0.00),-54(CAGCTG,+,0.00),0(CAGCTG,+,0.00),60(CAGCTG,+,0.00)	136(CAGGTG,+,0.00)
chr11-135	chr11	29603621	29603921	0(CAGCTG,+,0.00),27(CAGCTG,+,0.00)		-147(CACCTG,+,0.00),-51(CACCTG,+,0.00),-6(CACCTG,+,0.00)
chr2-65	chr2	119300070	119300370		0(CAGGTG,+,0.00)	-40(CACCTG,+,0.00)
chr9-63	chr9	75683782	75684082		-8(CAGGTG,+,0.00),0(CAGGTG,+,0.00)
chr13-27	chr13	95018028	95018328	0(CAGCTG,+,0.00),7(CAGCTG,+,0.00)	25(CAGGTG,+,0.00)
chr11-133	chr11	120065335	120065635	0(CAGCTG,+,0.00)	-69(CAGGTG,+,0.00),-27(CAGGTG,+,0.00),69(CAGGTG,+,0.00)
chr15-24	chr15	38384320	38384620	0(CAGCTG,+,0.00)		46(CACCTG,+,0.00)
chr5-34	chr5	30907762	30908062	0(CAGCTG,+,0.00),10(CAGCTG,+,0.00)
chr17-52	chr17	45602038	45602338	0(CAGCTG,+,0.00),32(CAGCTG,+,0.00)		14(CACCTG,+,0.00)
chr7-43	chr7	35382932	35383232		0(CAGGTG,+,0.00)	22(CACCTG,+,0.00)
chr10-31	chr10	96309160	96309460	-86(CAGCTG,+,0.00),0(CAGCTG,+,0.00)	102(CAGGTG,+,0.00)
chr18-18	chr18	43687668	43687968	0(CAGCTG,+,0.00)
chr4-44	chr4	94556722	94557022	0(CAGCTG,+,0.00)
chr7-41	chr7	58225777	58226077	0(CAGCTG,+,0.00)	-84(CAGGTG,+,0.00)
chr2-73	chr2	20665633	20665933	0(CAGCTG,+,0.00)	12(CAGGTG,+,0.00)
chr12-24	chr12	72688290	72688590	-92(CAGCTG,+,0.00),0(CAGCTG,+,0.00)	-86(CAGGTG,+,0.00)
chr7-49	chr7	63956950	63957250	0(CAGCTG,+,0.00)	-10(CAGGTG,+,0.00)
chr5-40	chr5	81654049	81654349	35(CAGCTG,+,0.00)	0(CAGGTG,+,0.00)	-140(CACCTG,+,0.00)
chr7-48	chr7	19817498	19817798	-48(CAGCTG,+,0.00),0(CAGCTG,+,0.00)
chr15-30	chr15	102399557	102399857	0(CAGCTG,+,0.00),37(CAGCTG,+,0.00)
chr6-31	chr6	60363806	60364106	-22(CAGCTG,+,0.00)	0(CAGGTG,+,0.00)
chr14-25	chr14	122416256	122416556		0(CAGGTG,+,0.00)
chr11-138	chr11	115258170	115258470	-30(CAGCTG,+,0.00),-6(CAGCTG,+,0.00)	0(CAGGTG,+,0.00)
chr2-70	chr2	146217247	146217547	0(CAGCTG,+,0.00)
chr18-21	chr18	10866290	10866590		0(CAGGTG,+,0.00)	-13(CACCTG,+,0.00),40(CACCTG,+,0.00)
chr11-136	chr11	61529218	61529518		0(CAGGTG,+,0.00)	-125(CACCTG,+,0.00)
chr1-41	chr1	84868889	84869189	-12(CAGCTG,+,0.00),0(CAGCTG,+,0.00)	12(CAGGTG,+,0.00)
chr18-24	chr18	65925151	65925451	-57(CAGCTG,+,0.00),0(CAGCTG,+,0.00)
chr9-76	chr9	102690101	102690401		0(CAGGTG,+,0.00)
chr10-36	chr10	3940992	3941292	0(CAGCTG,+,0.00)	60(CAGGTG,+,0.00)
chr13-31	chr13	41249683	41249983	0(CAGCTG,+,0.00)
chr14-28	chr14	118436811	118437111	0(CAGCTG,+,0.00),32(CAGCTG,+,0.00)
chr15-34	chr15	91078129	91078429	0(CAGCTG,+,0.00)	11(CAGGTG,+,0.00)
chr5-48	chr5	81519428	81519728	-20(CAGCTG,+,0.00),0(CAGCTG,+,0.00),66(CAGCTG,+,0.00)
chr10-39	chr10	77197411	77197711	-39(CAGCTG,+,0.00),0(CAGCTG,+,0.00)
chr5-46	chr5	147293303	147293603	-61(CAGCTG,+,0.00),-48(CAGCTG,+,0.00)	0(CAGGTG,+,0.00)
chr11-148	chr11	74536251	74536551	-57(CAGCTG,+,0.00),-6(CAGCTG,+,0.00)	0(CAGGTG,+,0.00),102(CAGGTG,+,0.00)
chr1-39	chr1	17506775	17507075	0(CAGCTG,+,0.00)		60(CACCTG,+,0.00),92(CACCTG,+,0.00)
chr4-52	chr4	105214524	105214824		0(CAGGTG,+,0.00)
chr8-42	chr8	111693237	111693537	0(CAGCTG,+,0.00),55(CAGCTG,+,0.00)
chr4-46	chr4	6093411	6093711		-44(CAGGTG,+,0.00),0(CAGGTG,+,0.00)
chr6-33	chr6	39131536	39131836		0(CAGGTG,+,0.00)
chr9-75	chr9	76565721	76566021	13(CAGCTG,+,0.00)	0(CAGGTG,+,0.00)
chr7-53	chr7	97830872	97831172		0(CAGGTG,+,0.00)
chr1-51	chr1	181853047	181853347	-38(CAGCTG,+,0.00),0(CAGCTG,+,0.00)		17(CACCTG,+,0.00)
chr3-34	chr3	101163438	101163738		0(CAGGTG,+,0.00)
chr17-58	chr17	31073276	31073576	93(CAGCTG,+,0.00)	-15(CAGGTG,+,0.00),0(CAGGTG,+,0.00)
chr4-57	chr4	10932443	10932743		-34(CAGGTG,+,0.00),0(CAGGTG,+,0.00)
chr1-46	chr1	74824905	74825205	-85(CAGCTG,+,0.00)	0(CAGGTG,+,0.00)
chr4-54	chr4	148087965	148088265	0(CAGCTG,+,0.00)
chr5-50	chr5	117413481	117413781		0(CAGGTG,+,0.00),22(CAGGTG,+,0.00)
chr1-54	chr1	63110578	63110878	-122(CAGCTG,+,0.00),13(CAGCTG,+,0.00)	0(CAGGTG,+,0.00)
chr1-45	chr1	11395434	11395734		0(CAGGTG,+,0.00)
chr13-35	chr13	99609348	99609648	0(CAGCTG,+,0.00)	-146(CAGGTG,+,0.00)
chr8-47	chr8	56252401	56252701	0(CAGCTG,+,0.00),35(CAGCTG,+,0.00)
chr1-53	chr1	12814427	12814727	-18(CAGCTG,+,0.00)	-117(CAGGTG,+,0.00),0(CAGGTG,+,0.00)
chr9-82	chr9	65109451	65109751	0(CAGCTG,+,0.00)
chr2-75	chr2	102231484	102231784	0(CAGCTG,+,0.00),40(CAGCTG,+,0.00)
chr17-55	chr17	79881199	79881499		0(CAGGTG,+,0.00),58(CAGGTG,+,0.00)
chr7-56	chr7	127935475	127935775	0(CAGCTG,+,0.00),12(CAGCTG,+,0.00)
chr8-48	chr8	90670780	90671080	0(CAGCTG,+,0.00)
chr5-52	chr5	18799572	18799872	0(CAGCTG,+,0.00)		-6(CACCTG,+,0.00)
chr16-26	chr16	16911905	16912205	0(CAGCTG,+,0.00)		48(CACCTG,+,0.00)
chr11-162	chr11	20231142	20231442	0(CAGCTG,+,0.00)
chrX-7	chrX	153119020	153119320	123(CAGCTG,+,0.00)	-104(CAGGTG,+,0.00),0(CAGGTG,+,0.00)
chr6-38	chr6	89008904	89009204	-75(CAGCTG,+,0.00),-43(CAGCTG,+,0.00),0(CAGCTG,+,0.00)
chr4-68	chr4	124708897	124709197	0(CAGCTG,+,0.00)
chr16-30	chr16	9132778	9133078		-138(CAGGTG,+,0.00),0(CAGGTG,+,0.00)
chr3-33	chr3	90224407	90224707		0(CAGGTG,+,0.00)
chrX-8	chrX	156303802	156304102	-92(CAGCTG,+,0.00)	-86(CAGGTG,+,0.00),0(CAGGTG,+,0.00)
chr7-69	chr7	49400670	49400970	0(CAGCTG,+,0.00),47(CAGCTG,+,0.00),54(CAGCTG,+,0.00)	-42(CAGGTG,+,0.00)
chr1-43	chr1	86509444	86509744	0(CAGCTG,+,0.00)		23(CACCTG,+,0.00)
chr10-49	chr10	67549219	67549519	0(CAGCTG,+,0.00)
chr12-29	chr12	21167810	21168110		0(CAGGTG,+,0.00),33(CAGGTG,+,0.00)
chr7-64	chr7	107236853	107237153	0(CAGCTG,+,0.00)
chr1-58	chr1	153641489	153641789	0(CAGCTG,+,0.00),79(CAGCTG,+,0.00)		-36(CACCTG,+,0.00)
chr10-44	chr10	111164497	111164797	0(CAGCTG,+,0.00)
chr11-167	chr11	5741200	5741500	-35(CAGCTG,+,0.00)	0(CAGGTG,+,0.00)
chr7-68	chr7	45162179	45162479		0(CAGGTG,+,0.00)	-58(CACCTG,+,0.00)
chr15-38	chr15	52967859	52968159	0(CAGCTG,+,0.00),18(CAGCTG,+,0.00),48(CAGCTG,+,0.00)
chr8-51	chr8	120537254	120537554		0(CAGGTG,+,0.00)
chr10-46	chr10	122678424	122678724	0(CAGCTG,+,0.00)		-79(CACCTG,+,0.00),31(CACCTG,+,0.00)
chr1-61	chr1	53750029	53750329		0(CAGGTG,+,0.00),28(CAGGTG,+,0.00)
chr7-70	chr7	130252211	130252511	0(CAGCTG,+,0.00)
chr14-29	chr14	25755234	25755534	0(CAGCTG,+,0.00)		87(CACCTG,+,0.00)
chr1-48	chr1	88924188	88924488	0(CAGCTG,+,0.00),80(CAGCTG,+,0.00)
chr14-35	chr14	123626361	123626661		-22(CAGGTG,+,0.00),0(CAGGTG,+,0.00)	86(CACCTG,+,0.00)
chr2-95	chr2	152707653	152707953	0(CAGCTG,+,0.00)		-86(CACCTG,+,0.00)
chr16-35	chr16	31509010	31509310	0(CAGCTG,+,0.00)
chr15-46	chr15	102211979	102212279		0(CAGGTG,+,0.00),15(CAGGTG,+,0.00)
chr13-40	chr13	85035961	85036261	-106(CAGCTG,+,0.00),-82(CAGCTG,+,0.00)	0(CAGGTG,+,0.00),129(CAGGTG,+,0.00)
chr12-33	chr12	99300026	99300326	0(CAGCTG,+,0.00)	-79(CAGGTG,+,0.00)
chr6-44	chr6	99009850	99010150	0(CAGCTG,+,0.00)	-51(CAGGTG,+,0.00)
chr11-175	chr11	67017832	67018132	0(CAGCTG,+,0.00)
chr4-64	chr4	26944648	26944948		0(CAGGTG,+,0.00)
chr3-37	chr3	11212331	11212631		0(CAGGTG,+,0.00),28(CAGGTG,+,0.00)
chr13-45	chr13	63272638	63272938		0(CAGGTG,+,0.00)
chr6-52	chr6	125442699	125442999	54(CAGCTG,+,0.00)	-83(CAGGTG,+,0.00),0(CAGGTG,+,0.00)
chr6-45	chr6	122764819	122765119		-22(CAGGTG,+,0.00),0(CAGGTG,+,0.00)
chr3-32	chr3	66687147	66687447	0(CAGCTG,+,0.00)		-74(CACCTG,+,0.00)
chr10-51	chr10	25314147	25314447		-39(CAGGTG,+,0.00),0(CAGGTG,+,0.00)
chr13-41	chr13	86345323	86345623	-109(CAGCTG,+,0.00)	-103(CAGGTG,+,0.00),0(CAGGTG,+,0.00)
chr9-95	chr9	83834142	83834442	0(CAGCTG,+,0.00)
chr6-46	chr6	20687077	20687377		0(CAGGTG,+,0.00),28(CAGGTG,+,0.00)
chr6-43	chr6	97048567	97048867	0(CAGCTG,+,0.00),19(CAGCTG,+,0.00)	-35(CAGGTG,+,0.00)
chr11-169	chr11	28171294	28171594	0(CAGCTG,+,0.00)		-40(CACCTG,+,0.00),-33(CACCTG,+,0.00)
chr2-89	chr2	135073068	135073368	0(CAGCTG,+,0.00)
chr7-74	chr7	4526251	4526551	0(CAGCTG,+,0.00)
chr6-48	chr6	35871397	35871697		0(CAGGTG,+,0.00)
chr13-38	chr13	64432358	64432658	0(CAGCTG,+,0.00)
chr3-40	chr3	137867214	137867514	-36(CAGCTG,+,0.00)	0(CAGGTG,+,0.00),7(CAGGTG,+,0.00)
chr15-45	chr15	80977669	80977969	0(CAGCTG,+,0.00)	44(CAGGTG,+,0.00)	96(CACCTG,+,0.00)
chr17-77	chr17	72836108	72836408	-75(CAGCTG,+,0.00),0(CAGCTG,+,0.00)		30(CACCTG,+,0.00)
chr5-68	chr5	108629559	108629859	0(CAGCTG,+,0.00)
chr16-39	chr16	18724742	18725042	0(CAGCTG,+,0.00)	-78(CAGGTG,+,0.00)
chr11-185	chr11	93968149	93968449	0(CAGCTG,+,0.00)
chr14-36	chr14	65968545	65968845	0(CAGCTG,+,0.00)
chr11-174	chr11	63533556	63533856	0(CAGCTG,+,0.00)	-6(CAGGTG,+,0.00)
chr15-55	chr15	102203378	102203678	0(CAGCTG,+,0.00)
chr8-56	chr8	70698258	70698558		0(CAGGTG,+,0.00)
chr9-92	chr9	17874876	17875176		0(CAGGTG,+,0.00),45(CAGGTG,+,0.00),78(CAGGTG,+,0.00)
chr2-99	chr2	38688859	38689159	0(CAGCTG,+,0.00)
chr13-43	chr13	26113474	26113774	77(CAGCTG,+,0.00)	0(CAGGTG,+,0.00)
chr7-75	chr7	29281882	29282182		-19(CAGGTG,+,0.00),0(CAGGTG,+,0.00),46(CAGGTG,+,0.00)
chr8-53	chr8	68368357	68368657		0(CAGGTG,+,0.00),57(CAGGTG,+,0.00)
chr9-99	chr9	122117028	122117328		0(CAGGTG,+,0.00)
chr1-74	chr1	91413217	91413517	0(CAGCTG,+,0.00)
chr12-34	chr12	100407336	100407636	0(CAGCTG,+,0.00)
chr12-36	chr12	84625076	84625376		0(CAGGTG,+,0.00)
chr5-59	chr5	110099039	110099339		0(CAGGTG,+,0.00),45(CAGGTG,+,0.00)
chr2-94	chr2	112265707	112266007	0(CAGCTG,+,0.00),21(CAGCTG,+,0.00)	-19(CAGGTG,+,0.00)
chr15-47	chr15	6909749	6910049	0(CAGCTG,+,0.00),119(CAGCTG,+,0.00)
chr10-52	chr10	33195891	33196191	-69(CAGCTG,+,0.00),0(CAGCTG,+,0.00)
chr6-58	chr6	125603176	125603476	0(CAGCTG,+,0.00),29(CAGCTG,+,0.00)	96(CAGGTG,+,0.00)
chr11-186	chr11	98682444	98682744	0(CAGCTG,+,0.00)
chr15-50	chr15	76119127	76119427		0(CAGGTG,+,0.00),13(CAGGTG,+,0.00)
chr17-74	chr17	47511280	47511580	-38(CAGCTG,+,0.00),0(CAGCTG,+,0.00)	19(CAGGTG,+,0.00)
chr6-47	chr6	24196499	24196799	-33(CAGCTG,+,0.00)	0(CAGGTG,+,0.00)
chr4-74	chr4	116720836	116721136	0(CAGCTG,+,0.00)
chr2-101	chr2	101665401	101665701	0(CAGCTG,+,0.00)	-47(CAGGTG,+,0.00)
chr4-84	chr4	45490000	45490300	0(CAGCTG,+,0.00)		38(CACCTG,+,0.00)
chr5-66	chr5	43860637	43860937	0(CAGCTG,+,0.00)	6(CAGGTG,+,0.00)
chr10-58	chr10	24166179	24166479	0(CAGCTG,+,0.00)	102(CAGGTG,+,0.00)
chr5-85	chr5	134099594	134099894	0(CAGCTG,+,0.00)
chr8-54	chr8	13786041	13786341	-142(CAGCTG,+,0.00),0(CAGCTG,+,0.00)	68(CAGGTG,+,0.00)	-65(CACCTG,+,0.00),42(CACCTG,+,0.00)
chr5-77	chr5	65526131	65526431		-47(CAGGTG,+,0.00),0(CAGGTG,+,0.00)
chr6-57	chr6	122340715	122341015	0(CAGCTG,+,0.00)	126(CAGGTG,+,0.00)
chr16-38	chr16	13818465	13818765	-148(CAGCTG,+,0.00)	0(CAGGTG,+,0.00)
chr12-42	chr12	82616708	82617008	21(CAGCTG,+,0.00)	-88(CAGGTG,+,0.00),-52(CAGGTG,+,0.00),-14(CAGGTG,+,0.00),0(CAGGTG,+,0.00)
chr14-41	chr14	54383590	54383890	-25(CAGCTG,+,0.00),0(CAGCTG,+,0.00)	95(CAGGTG,+,0.00)
chr17-82	chr17	90843128	90843428	-127(CAGCTG,+,0.00)	0(CAGGTG,+,0.00)
chr5-83	chr5	119055613	119055913		0(CAGGTG,+,0.00)
chr5-79	chr5	92106512	92106812		0(CAGGTG,+,0.00)	127(CACCTG,+,0.00)
chr11-183	chr11	75165424	75165724	0(CAGCTG,+,0.00),28(CAGCTG,+,0.00),36(CAGCTG,+,0.00)
chr10-64	chr10	110856029	110856329	-100(CAGCTG,+,0.00),0(CAGCTG,+,0.00)
chr8-62	chr8	122523321	122523621	-126(CAGCTG,+,0.00),-103(CAGCTG,+,0.00)	0(CAGGTG,+,0.00)
chr2-111	chr2	116979798	116980098	-49(CAGCTG,+,0.00),0(CAGCTG,+,0.00)
chr7-99	chr7	101302027	101302327		0(CAGGTG,+,0.00)
chr17-78	chr17	35865627	35865927	-65(CAGCTG,+,0.00),0(CAGCTG,+,0.00)
chr5-75	chr5	34175388	34175688	0(CAGCTG,+,0.00)
chr17-80	chr17	41070850	41071150	0(CAGCTG,+,0.00),27(CAGCTG,+,0.00)		-30(CACCTG,+,0.00)
chr1-77	chr1	192455095	192455395	26(CAGCTG,+,0.00)	0(CAGGTG,+,0.00)
chr7-93	chr7	3206562	3206862		0(CAGGTG,+,0.00)
chr4-94	chr4	83257314	83257614	-67(CAGCTG,+,0.00)	0(CAGGTG,+,0.00),123(CAGGTG,+,0.00)
chr12-38	chr12	25475459	25475759	26(CAGCTG,+,0.00)	0(CAGGTG,+,0.00)
chr10-56	chr10	121507401	121507701	-57(CAGCTG,+,0.00),0(CAGCTG,+,0.00)	22(CAGGTG,+,0.00)
chr6-51	chr6	91116438	91116738		0(CAGGTG,+,0.00),29(CAGGTG,+,0.00)
chr11-179	chr11	97568725	97569025	59(CAGCTG,+,0.00)	0(CAGGTG,+,0.00)
chr12-39	chr12	26068144	26068444	0(CAGCTG,+,0.00),46(CAGCTG,+,0.00),133(CAGCTG,+,0.00)		-141(CACCTG,+,0.00)
chr10-75	chr10	128705027	128705327	0(CAGCTG,+,0.00)	-128(CAGGTG,+,0.00)
chr4-83	chr4	43957461	43957761	-81(CAGCTG,+,0.00),0(CAGCTG,+,0.00)
chr2-124	chr2	126552381	126552681	6(CAGCTG,+,0.00)	0(CAGGTG,+,0.00)
chr5-91	chr5	34633722	34634022	0(CAGCTG,+,0.00)		-15(CACCTG,+,0.00)
chr14-39	chr14	45657949	45658249	0(CAGCTG,+,0.00)
chr10-67	chr10	36611400	36611700	0(CAGCTG,+,0.00)
chr11-212	chr11	97187663	97187963	0(CAGCTG,+,0.00)
chr1-95	chr1	86503311	86503611		0(CAGGTG,+,0.00)
chr5-76	chr5	61160202	61160502		0(CAGGTG,+,0.00)
chr10-62	chr10	57486258	57486558	0(CAGCTG,+,0.00)
chr5-101	chr5	140583903	140584203		0(CAGGTG,+,0.00)
chr3-44	chr3	35723571	35723871	0(CAGCTG,+,0.00)		-38(CACCTG,+,0.00)
chr3-45	chr3	144720139	144720439	-100(CAGCTG,+,0.00),0(CAGCTG,+,0.00)
chr4-101	chr4	101508951	101509251	-64(CAGCTG,+,0.00)	0(CAGGTG,+,0.00),8(CAGGTG,+,0.00),28(CAGGTG,+,0.00),74(CAGGTG,+,0.00)
chr12-43	chr12	86498744	86499044	20(CAGCTG,+,0.00)	0(CAGGTG,+,0.00)	-41(CACCTG,+,0.00)
chr12-45	chr12	100201883	100202183	0(CAGCTG,+,0.00)
chr14-43	chr14	55092289	55092589		0(CAGGTG,+,0.00)
chr8-64	chr8	4205288	4205588	-64(CAGCTG,+,0.00),0(CAGCTG,+,0.00)	-20(CAGGTG,+,0.00)	-27(CACCTG,+,0.00)
chr16-43	chr16	20611376	20611676	0(CAGCTG,+,0.00)
chr17-83	chr17	10567437	10567737	0(CAGCTG,+,0.00)
chr2-119	chr2	3546648	3546948	0(CAGCTG,+,0.00)		-43(CACCTG,+,0.00),24(CACCTG,+,0.00)
chr16-48	chr16	14557215	14557515		0(CAGGTG,+,0.00),44(CAGGTG,+,0.00)
chr1-92	chr1	17250843	17251143	-6(CAGCTG,+,0.00)	0(CAGGTG,+,0.00)
chr10-65	chr10	128035377	128035677	0(CAGCTG,+,0.00)
chr7-104	chr7	16874763	16875063	0(CAGCTG,+,0.00)
chr1-86	chr1	153493442	153493742	0(CAGCTG,+,0.00)		34(CACCTG,+,0.00)
chr19-29	chr19	4928072	4928372	-9(CAGCTG,+,0.00)	0(CAGGTG,+,0.00)
chr14-44	chr14	56887958	56888258	-132(CAGCTG,+,0.00),-91(CAGCTG,+,0.00),0(CAGCTG,+,0.00)
chr8-58	chr8	41374479	41374779	0(CAGCTG,+,0.00),34(CAGCTG,+,0.00)		65(CACCTG,+,0.00),89(CACCTG,+,0.00)
chr5-93	chr5	102845006	102845306	-45(CAGCTG,+,0.00)	0(CAGGTG,+,0.00)
chr17-86	chr17	15248024	15248324		0(CAGGTG,+,0.00)
chr3-63	chr3	127257630	127257930	0(CAGCTG,+,0.00)
chr1-91	chr1	3671627	3671927	-42(CAGCTG,+,0.00),0(CAGCTG,+,0.00)
chr2-110	chr2	105114086	105114386		0(CAGGTG,+,0.00)
chr11-221	chr11	3931954	3932254	0(CAGCTG,+,0.00),25(CAGCTG,+,0.00)
chr10-66	chr10	128149565	128149865	0(CAGCTG,+,0.00),10(CAGCTG,+,0.00)
chrX-16	chrX	95881147	95881447	114(CAGCTG,+,0.00)	0(CAGGTG,+,0.00)	7(CACCTG,+,0.00)
chr5-102	chr5	12847141	12847441		0(CAGGTG,+,0.00),28(CAGGTG,+,0.00)
chr3-54	chr3	12328456	12328756	-46(CAGCTG,+,0.00)	0(CAGGTG,+,0.00)
chr8-70	chr8	94172299	94172599		0(CAGGTG,+,0.00)
chr13-68	chr13	95535555	95535855		0(CAGGTG,+,0.00)
chr9-121	chr9	54586143	54586443	-59(CAGCTG,+,0.00),0(CAGCTG,+,0.00)
chr2-133	chr2	59229287	59229587		0(CAGGTG,+,0.00)
chr18-36	chr18	18058673	18058973		0(CAGGTG,+,0.00)
chr5-74	chr5	3943187	3943487		0(CAGGTG,+,0.00)
chr7-116	chr7	6286502	6286802	-31(CAGCTG,+,0.00)	0(CAGGTG,+,0.00)
chr14-40	chr14	48654992	48655292	0(CAGCTG,+,0.00),75(CAGCTG,+,0.00)		-36(CACCTG,+,0.00)
chr6-68	chr6	122342182	122342482		0(CAGGTG,+,0.00)
chr17-102	chr17	56716789	56717089	0(CAGCTG,+,0.00)
chr3-51	chr3	84665563	84665863		0(CAGGTG,+,0.00)	-102(CACCTG,+,0.00)
chr17-84	chr17	12195224	12195524	25(CAGCTG,+,0.00)	0(CAGGTG,+,0.00)
chr2-121	chr2	39190863	39191163		-55(CAGGTG,+,0.00),0(CAGGTG,+,0.00)	99(CACCTG,+,0.00)
chr15-64	chr15	28071165	28071465		0(CAGGTG,+,0.00)
chr19-42	chr19	42795356	42795656	0(CAGCTG,+,0.00)	-115(CAGGTG,+,0.00)	-47(CACCTG,+,0.00)
chr18-46	chr18	31568816	31569116		0(CAGGTG,+,0.00)
chr1-107	chr1	64655518	64655818	0(CAGCTG,+,0.00)	35(CAGGTG,+,0.00)
chr9-128	chr9	116427523	116427823	0(CAGCTG,+,0.00),22(CAGCTG,+,0.00)
chr9-116	chr9	114584681	114584981		0(CAGGTG,+,0.00)
chr14-46	chr14	122342158	122342458	0(CAGCTG,+,0.00)
chr13-67	chr13	95534182	95534482	0(CAGCTG,+,0.00)
chr1-112	chr1	89870534	89870834	0(CAGCTG,+,0.00),20(CAGCTG,+,0.00)
chrX-14	chrX	20356226	20356526	0(CAGCTG,+,0.00)
chr2-137	chr2	104122456	104122756	0(CAGCTG,+,0.00)
chr6-65	chr6	59168984	59169284		0(CAGGTG,+,0.00),45(CAGGTG,+,0.00)	-75(CACCTG,+,0.00)
chr1-103	chr1	46849754	46850054	-45(CAGCTG,+,0.00)	0(CAGGTG,+,0.00)
chr9-109	chr9	31976255	31976555	0(CAGCTG,+,0.00)	-90(CAGGTG,+,0.00)
chr19-43	chr19	55271557	55271857	14(CAGCTG,+,0.00)	0(CAGGTG,+,0.00)
chr15-67	chr15	73466647	73466947	0(CAGCTG,+,0.00)
chr5-87	chr5	23386963	23387263	0(CAGCTG,+,0.00),17(CAGCTG,+,0.00)
chr13-59	chr13	19631005	19631305	-140(CAGCTG,+,0.00)	0(CAGGTG,+,0.00)
chr17-101	chr17	56554289	56554589		0(CAGGTG,+,0.00),21(CAGGTG,+,0.00)
chr8-66	chr8	69939663	69939963	-33(CAGCTG,+,0.00)	0(CAGGTG,+,0.00),45(CAGGTG,+,0.00)
chr9-108	chr9	31438907	31439207	0(CAGCTG,+,0.00),47(CAGCTG,+,0.00)
chr9-126	chr9	92930620	92930920	0(CAGCTG,+,0.00)	82(CAGGTG,+,0.00)
chr12-49	chr12	36933205	36933505	23(CAGCTG,+,0.00)	0(CAGGTG,+,0.00)
chr4-112	chr4	109202183	109202483	19(CAGCTG,+,0.00)	0(CAGGTG,+,0.00)
chr8-81	chr8	120535458	120535758		-110(CAGGTG,+,0.00),0(CAGGTG,+,0.00),58(CAGGTG,+,0.00)
chr3-60	chr3	98024335	98024635		0(CAGGTG,+,0.00)
chr2-160	chr2	138265261	138265561	0(CAGCTG,+,0.00)
chr16-54	chr16	32608649	32608949		0(CAGGTG,+,0.00)
chr4-124	chr4	6115884	6116184		0(CAGGTG,+,0.00)
chr8-85	chr8	70522915	70523215		0(CAGGTG,+,0.00)
chr1-126	chr1	101756515	101756815	0(CAGCTG,+,0.00)
chr1-132	chr1	138963205	138963505		0(CAGGTG,+,0.00)
chr4-113	chr4	109476446	109476746	-12(CAGCTG,+,0.00),0(CAGCTG,+,0.00)
chr13-70	chr13	11005508	11005808	0(CAGCTG,+,0.00)
chr5-130	chr5	142701977	142702277	0(CAGCTG,+,0.00)
chr12-64	chr12	108293017	108293317	47(CAGCTG,+,0.00)	-75(CAGGTG,+,0.00),0(CAGGTG,+,0.00)
chr8-74	chr8	45999123	45999423	-10(CAGCTG,+,0.00)	-42(CAGGTG,+,0.00),0(CAGGTG,+,0.00)
chr9-137	chr9	49715145	49715445	0(CAGCTG,+,0.00)	-27(CAGGTG,+,0.00)
chr5-128	chr5	134006729	134007029	0(CAGCTG,+,0.00),43(CAGCTG,+,0.00)
chr8-87	chr8	75093464	75093764	0(CAGCTG,+,0.00),49(CAGCTG,+,0.00)
chr15-63	chr15	27998823	27999123		-38(CAGGTG,+,0.00),0(CAGGTG,+,0.00)
chr5-114	chr5	134340034	134340334	39(CAGCTG,+,0.00)	0(CAGGTG,+,0.00)
chr12-57	chr12	40995738	40996038		0(CAGGTG,+,0.00)
chr13-89	chr13	112001185	112001485	0(CAGCTG,+,0.00)		-54(CACCTG,+,0.00)
chr1-106	chr1	60432566	60432866		0(CAGGTG,+,0.00)
chr1-116	chr1	180933710	180934010	0(CAGCTG,+,0.00)
chr7-118	chr7	16781093	16781393		0(CAGGTG,+,0.00)
chr2-157	chr2	109942090	109942390	-45(CAGCTG,+,0.00),0(CAGCTG,+,0.00)
chr9-120	chr9	31960524	31960824	-66(CAGCTG,+,0.00)	0(CAGGTG,+,0.00)	24(CACCTG,+,0.00)
chr12-52	chr12	100168215	100168515		0(CAGGTG,+,0.00)
chr11-222	chr11	9116266	9116566	0(CAGCTG,+,0.00)
chr1-136	chr1	189761833	189762133	0(CAGCTG,+,0.00)	-74(CAGGTG,+,0.00)
chr2-153	chr2	30445384	30445684	0(CAGCTG,+,0.00)
chr11-241	chr11	26371997	26372297		0(CAGGTG,+,0.00),45(CAGGTG,+,0.00)
chr19-41	chr19	10972835	10973135		0(CAGGTG,+,0.00)
chr9-143	chr9	78374958	78375258		0(CAGGTG,+,0.00)
chr17-105	chr17	13668636	13668936	0(CAGCTG,+,0.00)
chr17-95	chr17	15208014	15208314		0(CAGGTG,+,0.00),76(CAGGTG,+,0.00)
chr9-147	chr9	102715043	102715343	0(CAGCTG,+,0.00)
chr7-127	chr7	111082652	111082952	0(CAGCTG,+,0.00),12(CAGCTG,+,0.00)
chr13-80	chr13	99940554	99940854	0(CAGCTG,+,0.00)		8(CACCTG,+,0.00)
chr12-54	chr12	17661569	17661869	0(CAGCTG,+,0.00)		37(CACCTG,+,0.00)
chr10-87	chr10	14967647	14967947	120(CAGCTG,+,0.00)	0(CAGGTG,+,0.00),20(CAGGTG,+,0.00)
chr4-157	chr4	75300631	75300931		0(CAGGTG,+,0.00)
chr8-77	chr8	105259630	105259930	-16(CAGCTG,+,0.00),11(CAGCTG,+,0.00)	0(CAGGTG,+,0.00)
chr14-59	chr14	58074861	58075161	-35(CAGCTG,+,0.00)	0(CAGGTG,+,0.00)
chr1-122	chr1	75477446	75477746		-15(CAGGTG,+,0.00),0(CAGGTG,+,0.00),6(CAGGTG,+,0.00)
chr5-141	chr5	36989134	36989434		0(CAGGTG,+,0.00)
chr13-94	chr13	29210854	29211154	-27(CAGCTG,+,0.00),0(CAGCTG,+,0.00)
chr14-48	chr14	57525371	57525671	0(CAGCTG,+,0.00),86(CAGCTG,+,0.00)		-121(CACCTG,+,0.00),-81(CACCTG,+,0.00)
chr19-50	chr19	12488137	12488437	-37(CAGCTG,+,0.00)	0(CAGGTG,+,0.00)
chr14-58	chr14	50930390	50930690		0(CAGGTG,+,0.00)	17(CACCTG,+,0.00)
chr9-167	chr9	106211331	106211631	-66(CAGCTG,+,0.00)	0(CAGGTG,+,0.00)
chr1-137	chr1	16824786	16825086		0(CAGGTG,+,0.00)
chr7-178	chr7	131696977	131697277	0(CAGCTG,+,0.00)
chr6-95	chr6	136470938	136471238	0(CAGCTG,+,0.00)
chr11-260	chr11	9117096	9117396		0(CAGGTG,+,0.00)
chr7-167	chr7	70624554	70624854	-142(CAGCTG,+,0.00),0(CAGCTG,+,0.00)
chr2-183	chr2	128211866	128212166		-79(CAGGTG,+,0.00),0(CAGGTG,+,0.00)
chr4-172	chr4	138445027	138445327	0(CAGCTG,+,0.00),35(CAGCTG,+,0.00),55(CAGCTG,+,0.00)
chr2-155	chr2	102244525	102244825		-91(CAGGTG,+,0.00),0(CAGGTG,+,0.00)	14(CACCTG,+,0.00)
chr1-121	chr1	74803048	74803348	-25(CAGCTG,+,0.00),93(CAGCTG,+,0.00)	0(CAGGTG,+,0.00)
chr10-94	chr10	67979573	67979873	0(CAGCTG,+,0.00),60(CAGCTG,+,0.00)	87(CAGGTG,+,0.00)
chr13-108	chr13	101235316	101235616	-85(CAGCTG,+,0.00),0(CAGCTG,+,0.00)
chr3-68	chr3	84040095	84040395	0(CAGCTG,+,0.00)
chr1-153	chr1	146322890	146323190		0(CAGGTG,+,0.00)
chr2-161	chr2	146838623	146838923	-126(CAGCTG,+,0.00),80(CAGCTG,+,0.00)	0(CAGGTG,+,0.00)
chr9-106	chr9	25400964	25401264	0(CAGCTG,+,0.00)
chr9-134	chr9	25151569	25151869		0(CAGGTG,+,0.00)
chr2-174	chr2	44538175	44538475	-31(CAGCTG,+,0.00)	0(CAGGTG,+,0.00)
chr11-280	chr11	100939401	100939701	0(CAGCTG,+,0.00)
chr15-98	chr15	85017021	85017321		-23(CAGGTG,+,0.00),0(CAGGTG,+,0.00)
chr6-79	chr6	146343003	146343303	0(CAGCTG,+,0.00)
chr17-136	chr17	88440661	88440961	-61(CAGCTG,+,0.00),0(CAGCTG,+,0.00)
chr4-155	chr4	55477992	55478292	0(CAGCTG,+,0.00)
chr2-154	chr2	92947965	92948265	-57(CAGCTG,+,0.00),-51(CAGCTG,+,0.00),0(CAGCTG,+,0.00)
chr1-138	chr1	52953111	52953411		0(CAGGTG,+,0.00)	-84(CACCTG,+,0.00),-67(CACCTG,+,0.00),15(CACCTG,+,0.00)
chr3-78	chr3	86936275	86936575	0(CAGCTG,+,0.00)		-36(CACCTG,+,0.00)
chr18-58	chr18	17874544	17874844	-6(CAGCTG,+,0.00)	0(CAGGTG,+,0.00)
chr15-71	chr15	84988030	84988330	0(CAGCTG,+,0.00)
chr13-111	chr13	112987412	112987712	-59(CAGCTG,+,0.00),0(CAGCTG,+,0.00)
chr6-85	chr6	65061017	65061317	0(CAGCTG,+,0.00)
chr12-60	chr12	76547869	76548169		0(CAGGTG,+,0.00)
chr15-84	chr15	36126770	36127070	0(CAGCTG,+,0.00)
chr1-151	chr1	132586985	132587285		0(CAGGTG,+,0.00),70(CAGGTG,+,0.00)	-24(CACCTG,+,0.00)
chr7-147	chr7	112743755	112744055	0(CAGCTG,+,0.00)
chr4-170	chr4	134081983	134082283		-53(CAGGTG,+,0.00),0(CAGGTG,+,0.00)
chr7-145	chr7	106745826	106746126		0(CAGGTG,+,0.00),32(CAGGTG,+,0.00)
chr2-148	chr2	26902867	26903167	0(CAGCTG,+,0.00)
chr1-160	chr1	192834703	192835003	0(CAGCTG,+,0.00),10(CAGCTG,+,0.00)
chr5-165	chr5	43983179	43983479	0(CAGCTG,+,0.00)	55(CAGGTG,+,0.00)
chr3-81	chr3	98734396	98734696		0(CAGGTG,+,0.00)
chr7-173	chr7	112841887	112842187		0(CAGGTG,+,0.00)
chr13-120	chr13	45306293	45306593	0(CAGCTG,+,0.00)
chr13-110	chr13	111808594	111808894	-33(CAGCTG,+,0.00),0(CAGCTG,+,0.00)
chr5-172	chr5	104076386	104076686	0(CAGCTG,+,0.00)
chr9-182	chr9	45055096	45055396	0(CAGCTG,+,0.00),83(CAGCTG,+,0.00)		-63(CACCTG,+,0.00)
chr15-105	chr15	41789161	41789461	42(CAGCTG,+,0.00)	0(CAGGTG,+,0.00),16(CAGGTG,+,0.00)
chr2-219	chr2	150608507	150608807	0(CAGCTG,+,0.00)
chr8-128	chr8	79030945	79031245	0(CAGCTG,+,0.00)
chr5-157	chr5	18083823	18084123	0(CAGCTG,+,0.00)	14(CAGGTG,+,0.00)	-59(CACCTG,+,0.00)
chr16-97	chr16	89954503	89954803	0(CAGCTG,+,0.00)
chr11-303	chr11	47640756	47641056	0(CAGCTG,+,0.00),49(CAGCTG,+,0.00),98(CAGCTG,+,0.00)
chr14-57	chr14	34303251	34303551	0(CAGCTG,+,0.00),89(CAGCTG,+,0.00)		9(CACCTG,+,0.00)
chr9-146	chr9	99319657	99319957		0(CAGGTG,+,0.00)
chr12-94	chr12	116404976	116405276	0(CAGCTG,+,0.00)
chr8-116	chr8	4217341	4217641		0(CAGGTG,+,0.00)
chr9-200	chr9	111487182	111487482	0(CAGCTG,+,0.00),24(CAGCTG,+,0.00)		95(CACCTG,+,0.00)
chr1-134	chr1	182489764	182490064	0(CAGCTG,+,0.00),40(CAGCTG,+,0.00)
chr1-192	chr1	194223055	194223355	-24(CAGCTG,+,0.00),0(CAGCTG,+,0.00)
chr6-92	chr6	116107725	116108025	0(CAGCTG,+,0.00),11(CAGCTG,+,0.00)	89(CAGGTG,+,0.00)
chr15-107	chr15	59828543	59828843		0(CAGGTG,+,0.00)
chr5-137	chr5	28176669	28176969	0(CAGCTG,+,0.00)	19(CAGGTG,+,0.00)
chr17-124	chr17	32947479	32947779	-127(CAGCTG,+,0.00)	0(CAGGTG,+,0.00)
chr5-151	chr5	134332844	134333144		0(CAGGTG,+,0.00)
chr13-101	chr13	59770234	59770534	0(CAGCTG,+,0.00)
chr1-175	chr1	78657463	78657763	0(CAGCTG,+,0.00)
chr6-107	chr6	39420405	39420705		0(CAGGTG,+,0.00)
chr14-71	chr14	47419952	47420252	0(CAGCTG,+,0.00)
chr1-140	chr1	66700624	66700924	-49(CAGCTG,+,0.00),0(CAGCTG,+,0.00)		-73(CACCTG,+,0.00)
chr9-181	chr9	41935642	41935942		0(CAGGTG,+,0.00)
chr8-131	chr8	83036790	83037090		0(CAGGTG,+,0.00)
chr3-96	chr3	67449717	67450017	0(CAGCTG,+,0.00)
chr8-144	chr8	114116183	114116483	-47(CAGCTG,+,0.00),0(CAGCTG,+,0.00)
chr6-76	chr6	39423327	39423627	0(CAGCTG,+,0.00)	-109(CAGGTG,+,0.00)
chr6-98	chr6	4684915	4685215	-140(CAGCTG,+,0.00),-18(CAGCTG,+,0.00)	0(CAGGTG,+,0.00)	93(CACCTG,+,0.00)
chr17-127	chr17	47521661	47521961	0(CAGCTG,+,0.00),25(CAGCTG,+,0.00)
chr18-73	chr18	14512192	14512492	0(CAGCTG,+,0.00)
chr17-139	chr17	6827898	6828198		0(CAGGTG,+,0.00)	31(CACCTG,+,0.00)
chr14-65	chr14	32165544	32165844		0(CAGGTG,+,0.00)	139(CACCTG,+,0.00)
chr16-96	chr16	88720106	88720406		0(CAGGTG,+,0.00)	-27(CACCTG,+,0.00)
chr5-132	chr5	8417516	8417816	0(CAGCTG,+,0.00),24(CAGCTG,+,0.00)
chr1-141	chr1	74854772	74855072	0(CAGCTG,+,0.00)
chr12-69	chr12	69229318	69229618	-112(CAGCTG,+,0.00),0(CAGCTG,+,0.00)	-23(CAGGTG,+,0.00)
chr6-105	chr6	34317463	34317763	0(CAGCTG,+,0.00)
chr3-86	chr3	146404340	146404640	15(CAGCTG,+,0.00)	0(CAGGTG,+,0.00)	-133(CACCTG,+,0.00)
chr1-207	chr1	44331849	44332149	0(CAGCTG,+,0.00)
chr9-232	chr9	57561126	57561426		0(CAGGTG,+,0.00)	-71(CACCTG,+,0.00)
chr7-221	chr7	19157421	19157721		0(CAGGTG,+,0.00)
chr17-226	chr17	65872702	65873002	126(CAGCTG,+,0.00)	0(CAGGTG,+,0.00)
chr10-145	chr10	7619750	7620050		-45(CAGGTG,+,0.00),0(CAGGTG,+,0.00)
chr6-170	chr6	136469112	136469412	0(CAGCTG,+,0.00),43(CAGCTG,+,0.00)
chr15-137	chr15	62092482	62092782		0(CAGGTG,+,0.00)
chr18-78	chr18	38601502	38601802	0(CAGCTG,+,0.00)
chr3-112	chr3	6173763	6174063	-113(CAGCTG,+,0.00)	0(CAGGTG,+,0.00)
chr5-225	chr5	70896582	70896882	0(CAGCTG,+,0.00)		-45(CACCTG,+,0.00)
chr17-234	chr17	87282762	87283062	0(CAGCTG,+,0.00)
chrX-26	chrX	12840249	12840549	-42(CAGCTG,+,0.00),0(CAGCTG,+,0.00)
chr9-230	chr9	52168724	52169024		0(CAGGTG,+,0.00)
chr4-200	chr4	94752489	94752789	0(CAGCTG,+,0.00),83(CAGCTG,+,0.00)		-41(CACCTG,+,0.00)
chr8-146	chr8	117314586	117314886	0(CAGCTG,+,0.00)	-31(CAGGTG,+,0.00)
chr5-249	chr5	122191587	122191887		0(CAGGTG,+,0.00),34(CAGGTG,+,0.00)
chr3-120	chr3	14863205	14863505	-137(CAGCTG,+,0.00),0(CAGCTG,+,0.00)
chr12-96	chr12	6595557	6595857		0(CAGGTG,+,0.00)
chr14-113	chr14	117337302	117337602	0(CAGCTG,+,0.00)	-67(CAGGTG,+,0.00)
chr11-343	chr11	16602908	16603208	-127(CAGCTG,+,0.00),-13(CAGCTG,+,0.00),0(CAGCTG,+,0.00)		-54(CACCTG,+,0.00)
chr3-140	chr3	91964573	91964873		0(CAGGTG,+,0.00),45(CAGGTG,+,0.00)
chr9-165	chr9	93297302	93297602	0(CAGCTG,+,0.00),61(CAGCTG,+,0.00)
chr13-139	chr13	17457968	17458268	0(CAGCTG,+,0.00)
chr2-313	chr2	180024461	180024761		0(CAGGTG,+,0.00),72(CAGGTG,+,0.00)
chr4-234	chr4	152290537	152290837	0(CAGCTG,+,0.00)	-39(CAGGTG,+,0.00)
chr5-235	chr5	102373639	102373939	-42(CAGCTG,+,0.00),0(CAGCTG,+,0.00)
chr10-118	chr10	11801880	11802180		0(CAGGTG,+,0.00)
chr7-224	chr7	19771229	19771529		0(CAGGTG,+,0.00)
chr17-134	chr17	79364701	79365001		0(CAGGTG,+,0.00),40(CAGGTG,+,0.00)
chr16-140	chr16	93711799	93712099	0(CAGCTG,+,0.00)
chr3-97	chr3	68565117	68565417		0(CAGGTG,+,0.00),24(CAGGTG,+,0.00)
chr15-104	chr15	22086980	22087280	0(CAGCTG,+,0.00)		-116(CACCTG,+,0.00),-6(CACCTG,+,0.00)
chr7-243	chr7	95809746	95810046	-71(CAGCTG,+,0.00)	0(CAGGTG,+,0.00)
chr8-161	chr8	27174572	27174872		0(CAGGTG,+,0.00)
chr8-122	chr8	45235269	45235569	0(CAGCTG,+,0.00)	-12(CAGGTG,+,0.00)
chr6-119	chr6	129349796	129350096		0(CAGGTG,+,0.00)
chr16-134	chr16	77050388	77050688		0(CAGGTG,+,0.00)
chr9-195	chr9	96324786	96325086	0(CAGCTG,+,0.00)	-69(CAGGTG,+,0.00)
chr3-95	chr3	66973737	66974037	0(CAGCTG,+,0.00),6(CAGCTG,+,0.00)	-45(CAGGTG,+,0.00),-33(CAGGTG,+,0.00)
chr6-160	chr6	119417508	119417808		0(CAGGTG,+,0.00)
chr2-214	chr2	131142744	131143044	0(CAGCTG,+,0.00)
chr6-117	chr6	122772768	122773068		0(CAGGTG,+,0.00)
chr9-213	chr9	13699342	13699642		0(CAGGTG,+,0.00)
chr4-240	chr4	4424625	4424925	18(CAGCTG,+,0.00)	0(CAGGTG,+,0.00)
chr19-66	chr19	59585827	59586127	0(CAGCTG,+,0.00),65(CAGCTG,+,0.00)
chr16-128	chr16	42269297	42269597	0(CAGCTG,+,0.00)
chr7-203	chr7	82566783	82567083		0(CAGGTG,+,0.00)	-31(CACCTG,+,0.00)
chr7-223	chr7	19403989	19404289		0(CAGGTG,+,0.00)	-121(CACCTG,+,0.00)
chr1-171	chr1	72960251	72960551	-72(CAGCTG,+,0.00),0(CAGCTG,+,0.00)
chr11-295	chr11	9263102	9263402		0(CAGGTG,+,0.00),44(CAGGTG,+,0.00)
chr8-123	chr8	46617013	46617313	0(CAGCTG,+,0.00)
chr6-169	chr6	134830394	134830694		0(CAGGTG,+,0.00)
chr3-114	chr3	8005748	8006048	0(CAGCTG,+,0.00)	-7(CAGGTG,+,0.00)
chr5-243	chr5	118436758	118437058		0(CAGGTG,+,0.00)
chr18-96	chr18	25423673	25423973	-35(CAGCTG,+,0.00)	0(CAGGTG,+,0.00)
chr11-339	chr11	4186408	4186708		0(CAGGTG,+,0.00),51(CAGGTG,+,0.00)
chr17-118	chr17	23664601	23664901		0(CAGGTG,+,0.00)
chr9-257	chr9	113458943	113459243		0(CAGGTG,+,0.00)
chr10-197	chr10	120171507	120171807	0(CAGCTG,+,0.00)	18(CAGGTG,+,0.00)
chr2-239	chr2	20209385	20209685		-77(CAGGTG,+,0.00),0(CAGGTG,+,0.00)
chr16-76	chr16	4602278	4602578	-83(CAGCTG,+,0.00)	0(CAGGTG,+,0.00)
chr8-120	chr8	37916467	37916767		0(CAGGTG,+,0.00)	112(CACCTG,+,0.00)
chr3-121	chr3	18256583	18256883	0(CAGCTG,+,0.00)
chr1-194	chr1	7777205	7777505	-113(CAGCTG,+,0.00),0(CAGCTG,+,0.00),22(CAGCTG,+,0.00)
chr10-186	chr10	94514740	94515040	-130(CAGCTG,+,0.00),0(CAGCTG,+,0.00),68(CAGCTG,+,0.00)		-117(CACCTG,+,0.00)
chr7-230	chr7	29317630	29317930	0(CAGCTG,+,0.00),31(CAGCTG,+,0.00)
chr17-214	chr17	37990586	37990886		-149(CAGGTG,+,0.00),0(CAGGTG,+,0.00)
chr6-141	chr6	49367702	49368002	0(CAGCTG,+,0.00)
chrX-29	chrX	68492050	68492350	0(CAGCTG,+,0.00)
chr5-221	chr5	60882412	60882712		0(CAGGTG,+,0.00)
chr1-214	chr1	64226319	64226619		0(CAGGTG,+,0.00)
chr1-236	chr1	106072148	106072448	0(CAGCTG,+,0.00),122(CAGCTG,+,0.00)	-18(CAGGTG,+,0.00)
chr9-243	chr9	79751904	79752204		0(CAGGTG,+,0.00),56(CAGGTG,+,0.00)
chr19-79	chr19	21778058	21778358	0(CAGCTG,+,0.00)
chr6-125	chr6	7844522	7844822	0(CAGCTG,+,0.00)
chr19-89	chr19	40894512	40894812		0(CAGGTG,+,0.00)
chr2-280	chr2	133596582	133596882	0(CAGCTG,+,0.00)
chr7-185	chr7	17056174	17056474	42(CAGCTG,+,0.00)	0(CAGGTG,+,0.00)	-67(CACCTG,+,0.00)
chr16-115	chr16	21701898	21702198	0(CAGCTG,+,0.00)
chr1-254	chr1	167002524	167002824	0(CAGCTG,+,0.00)
chr6-159	chr6	119388316	119388616		0(CAGGTG,+,0.00)
chr16-107	chr16	14705248	14705548	-46(CAGCTG,+,0.00),0(CAGCTG,+,0.00)

## Sheet: ASCL1_closed
PeakID	Chr	Start	End	CAGCTG Distance From Peak(sequence,strand,conservation)	CAGGTG Distance From Peak(sequence,strand,conservation)	CACCTG Distance From Peak(sequence,strand,conservation)
chr17-1	chr17	28388596	28388896	-108(CAGCTG,+,0.00),-96(CAGCTG,+,0.00),-84(CAGCTG,+,0.00),-72(CAGCTG,+,0.00),-60(CAGCTG,+,0.00),-48(CAGCTG,+,0.00),-36(CAGCTG,+,0.00),-24(CAGCTG,+,0.00),-12(CAGCTG,+,0.00),0(CAGCTG,+,0.00),24(CAGCTG,+,0.00),36(CAGCTG,+,0.00),48(CAGCTG,+,0.00),60(CAGCTG,+,0.00),72(CAGCTG,+,0.00),83(CAGCTG,+,0.00),95(CAGCTG,+,0.00)	12(CAGGTG,+,0.00)
chr4-1	chr4	107366500	107366800		-55(CAGGTG,+,0.00),-44(CAGGTG,+,0.00),-33(CAGGTG,+,0.00),-22(CAGGTG,+,0.00),-11(CAGGTG,+,0.00),0(CAGGTG,+,0.00),11(CAGGTG,+,0.00),22(CAGGTG,+,0.00),33(CAGGTG,+,0.00),44(CAGGTG,+,0.00),55(CAGGTG,+,0.00),66(CAGGTG,+,0.00),77(CAGGTG,+,0.00),88(CAGGTG,+,0.00),99(CAGGTG,+,0.00),110(CAGGTG,+,0.00),118(CAGGTG,+,0.00)
chr11-1	chr11	70724412	70724712		-96(CAGGTG,+,0.00),-64(CAGGTG,+,0.00),-32(CAGGTG,+,0.00),0(CAGGTG,+,0.00),32(CAGGTG,+,0.00),64(CAGGTG,+,0.00),96(CAGGTG,+,0.00)	-76(CACCTG,+,0.00),-44(CACCTG,+,0.00),-12(CACCTG,+,0.00),20(CACCTG,+,0.00),52(CACCTG,+,0.00),84(CACCTG,+,0.00)
chr4-2	chr4	152572381	152572681	-131(CAGCTG,+,0.00),-79(CAGCTG,+,0.00),-53(CAGCTG,+,0.00),-13(CAGCTG,+,0.00),52(CAGCTG,+,0.00),115(CAGCTG,+,0.00),129(CAGCTG,+,0.00)	-144(CAGGTG,+,0.00),-105(CAGGTG,+,0.00),-92(CAGGTG,+,0.00),-66(CAGGTG,+,0.00),-40(CAGGTG,+,0.00),-27(CAGGTG,+,0.00),0(CAGGTG,+,0.00),13(CAGGTG,+,0.00),26(CAGGTG,+,0.00),39(CAGGTG,+,0.00),65(CAGGTG,+,0.00),78(CAGGTG,+,0.00)
chr17-9	chr17	8205207	8205507	-126(CAGCTG,+,0.00),-105(CAGCTG,+,0.00),-81(CAGCTG,+,0.00),-61(CAGCTG,+,0.00),-40(CAGCTG,+,0.00),-20(CAGCTG,+,0.00),0(CAGCTG,+,0.00),21(CAGCTG,+,0.00),41(CAGCTG,+,0.00),62(CAGCTG,+,0.00),82(CAGCTG,+,0.00),102(CAGCTG,+,0.00),122(CAGCTG,+,0.00)	-72(CAGGTG,+,0.00),-11(CAGGTG,+,0.00),9(CAGGTG,+,0.00),50(CAGGTG,+,0.00),91(CAGGTG,+,0.00),111(CAGGTG,+,0.00),131(CAGGTG,+,0.00)
chr3-1	chr3	9540449	9540749	106(CAGCTG,+,0.00)	-104(CAGGTG,+,0.00),-91(CAGGTG,+,0.00),-78(CAGGTG,+,0.00),-65(CAGGTG,+,0.00),-52(CAGGTG,+,0.00),-39(CAGGTG,+,0.00),-26(CAGGTG,+,0.00),-13(CAGGTG,+,0.00),0(CAGGTG,+,0.00),13(CAGGTG,+,0.00),26(CAGGTG,+,0.00),39(CAGGTG,+,0.00),52(CAGGTG,+,0.00),65(CAGGTG,+,0.00),78(CAGGTG,+,0.00)
chr17-10	chr17	7187060	7187360		-146(CAGGTG,+,0.00),-114(CAGGTG,+,0.00),-82(CAGGTG,+,0.00),-50(CAGGTG,+,0.00),-32(CAGGTG,+,0.00),-18(CAGGTG,+,0.00),0(CAGGTG,+,0.00),14(CAGGTG,+,0.00),32(CAGGTG,+,0.00),46(CAGGTG,+,0.00),64(CAGGTG,+,0.00),78(CAGGTG,+,0.00),96(CAGGTG,+,0.00),110(CAGGTG,+,0.00)
chr8-2	chr8	83584783	83585083	-124(CAGCTG,+,0.00),-93(CAGCTG,+,0.00),-62(CAGCTG,+,0.00),-31(CAGCTG,+,0.00),0(CAGCTG,+,0.00),31(CAGCTG,+,0.00)		-117(CACCTG,+,0.00),-86(CACCTG,+,0.00),-77(CACCTG,+,0.00),-46(CACCTG,+,0.00),-24(CACCTG,+,0.00),-15(CACCTG,+,0.00),7(CACCTG,+,0.00),16(CACCTG,+,0.00),38(CACCTG,+,0.00),47(CACCTG,+,0.00)
chr6-1	chr6	100320644	100320944	-110(CAGCTG,+,0.00)	-90(CAGGTG,+,0.00),-75(CAGGTG,+,0.00),-60(CAGGTG,+,0.00),-45(CAGGTG,+,0.00),-30(CAGGTG,+,0.00),-15(CAGGTG,+,0.00),0(CAGGTG,+,0.00),15(CAGGTG,+,0.00),30(CAGGTG,+,0.00),45(CAGGTG,+,0.00),60(CAGGTG,+,0.00),90(CAGGTG,+,0.00),105(CAGGTG,+,0.00)
chr4-4	chr4	140171446	140171746		-43(CAGGTG,+,0.00),-31(CAGGTG,+,0.00),-12(CAGGTG,+,0.00),0(CAGGTG,+,0.00),19(CAGGTG,+,0.00),38(CAGGTG,+,0.00),57(CAGGTG,+,0.00),76(CAGGTG,+,0.00),95(CAGGTG,+,0.00),133(CAGGTG,+,0.00)
chr1-2	chr1	189991128	189991428	-77(CAGCTG,+,0.00),-39(CAGCTG,+,0.00),10(CAGCTG,+,0.00),60(CAGCTG,+,0.00)	-90(CAGGTG,+,0.00),-52(CAGGTG,+,0.00),0(CAGGTG,+,0.00),23(CAGGTG,+,0.00),36(CAGGTG,+,0.00),49(CAGGTG,+,0.00),73(CAGGTG,+,0.00)
chr8-3	chr8	116607994	116608294		-144(CAGGTG,+,0.00),-108(CAGGTG,+,0.00),-96(CAGGTG,+,0.00),-60(CAGGTG,+,0.00),-48(CAGGTG,+,0.00),-36(CAGGTG,+,0.00),-24(CAGGTG,+,0.00),-12(CAGGTG,+,0.00),0(CAGGTG,+,0.00),12(CAGGTG,+,0.00),24(CAGGTG,+,0.00),36(CAGGTG,+,0.00),48(CAGGTG,+,0.00),60(CAGGTG,+,0.00),72(CAGGTG,+,0.00),84(CAGGTG,+,0.00),96(CAGGTG,+,0.00),132(CAGGTG,+,0.00)
chr16-1	chr16	91693217	91693517		-80(CAGGTG,+,0.00),-40(CAGGTG,+,0.00),0(CAGGTG,+,0.00),40(CAGGTG,+,0.00),80(CAGGTG,+,0.00),120(CAGGTG,+,0.00)	-66(CACCTG,+,0.00),-26(CACCTG,+,0.00),14(CACCTG,+,0.00),54(CACCTG,+,0.00),134(CACCTG,+,0.00)
chr3-3	chr3	53151653	53151953	-54(CAGCTG,+,0.00),-38(CAGCTG,+,0.00),-22(CAGCTG,+,0.00),0(CAGCTG,+,0.00),16(CAGCTG,+,0.00),38(CAGCTG,+,0.00),54(CAGCTG,+,0.00),69(CAGCTG,+,0.00)
chr16-2	chr16	8481706	8482006		-107(CAGGTG,+,0.00),-97(CAGGTG,+,0.00),-68(CAGGTG,+,0.00),-58(CAGGTG,+,0.00),-49(CAGGTG,+,0.00),-39(CAGGTG,+,0.00),-30(CAGGTG,+,0.00),-10(CAGGTG,+,0.00),0(CAGGTG,+,0.00),9(CAGGTG,+,0.00),29(CAGGTG,+,0.00),39(CAGGTG,+,0.00),57(CAGGTG,+,0.00),76(CAGGTG,+,0.00),95(CAGGTG,+,0.00),105(CAGGTG,+,0.00),124(CAGGTG,+,0.00),134(CAGGTG,+,0.00),143(CAGGTG,+,0.00)
chr9-5	chr9	61128112	61128412		-72(CAGGTG,+,0.00),-60(CAGGTG,+,0.00),-24(CAGGTG,+,0.00),-12(CAGGTG,+,0.00),0(CAGGTG,+,0.00),24(CAGGTG,+,0.00),36(CAGGTG,+,0.00),48(CAGGTG,+,0.00)
chr2-6	chr2	164670980	164671280	-56(CAGCTG,+,0.00),-44(CAGCTG,+,0.00),-28(CAGCTG,+,0.00),-16(CAGCTG,+,0.00),0(CAGCTG,+,0.00),12(CAGCTG,+,0.00)		-150(CACCTG,+,0.00),45(CACCTG,+,0.00),87(CACCTG,+,0.00),106(CACCTG,+,0.00)
chr3-4	chr3	58871859	58872159	-119(CAGCTG,+,0.00),-64(CAGCTG,+,0.00),-52(CAGCTG,+,0.00),-32(CAGCTG,+,0.00),-20(CAGCTG,+,0.00),0(CAGCTG,+,0.00),12(CAGCTG,+,0.00),32(CAGCTG,+,0.00),44(CAGCTG,+,0.00),64(CAGCTG,+,0.00),76(CAGCTG,+,0.00)	-70(CAGGTG,+,0.00)	114(CACCTG,+,0.00)
chr13-1	chr13	100990674	100990974		-91(CAGGTG,+,0.00),-78(CAGGTG,+,0.00),-65(CAGGTG,+,0.00),-52(CAGGTG,+,0.00),-39(CAGGTG,+,0.00),-26(CAGGTG,+,0.00),-13(CAGGTG,+,0.00),0(CAGGTG,+,0.00),13(CAGGTG,+,0.00),26(CAGGTG,+,0.00),39(CAGGTG,+,0.00),52(CAGGTG,+,0.00)
chr11-5	chr11	117451616	117451916		-144(CAGGTG,+,0.00),-120(CAGGTG,+,0.00),-96(CAGGTG,+,0.00),-78(CAGGTG,+,0.00),-72(CAGGTG,+,0.00),-54(CAGGTG,+,0.00),-48(CAGGTG,+,0.00),-30(CAGGTG,+,0.00),-12(CAGGTG,+,0.00),0(CAGGTG,+,0.00),6(CAGGTG,+,0.00),18(CAGGTG,+,0.00),30(CAGGTG,+,0.00),42(CAGGTG,+,0.00),54(CAGGTG,+,0.00),60(CAGGTG,+,0.00),84(CAGGTG,+,0.00),90(CAGGTG,+,0.00),108(CAGGTG,+,0.00),138(CAGGTG,+,0.00),144(CAGGTG,+,0.00)
chr2-8	chr2	31870725	31871025	-54(CAGCTG,+,0.00),20(CAGCTG,+,0.00)	-123(CAGGTG,+,0.00),-37(CAGGTG,+,0.00),0(CAGGTG,+,0.00),37(CAGGTG,+,0.00),57(CAGGTG,+,0.00)	-20(CACCTG,+,0.00),102(CACCTG,+,0.00)
chr1-3	chr1	74424017	74424317		-132(CAGGTG,+,0.00),-121(CAGGTG,+,0.00),-87(CAGGTG,+,0.00),-55(CAGGTG,+,0.00),-32(CAGGTG,+,0.00),-21(CAGGTG,+,0.00),0(CAGGTG,+,0.00),11(CAGGTG,+,0.00),45(CAGGTG,+,0.00),77(CAGGTG,+,0.00),111(CAGGTG,+,0.00),143(CAGGTG,+,0.00)
chr9-8	chr9	64497263	64497563	24(CAGCTG,+,0.00)	-141(CAGGTG,+,0.00),-132(CAGGTG,+,0.00),-108(CAGGTG,+,0.00),-99(CAGGTG,+,0.00),-75(CAGGTG,+,0.00),-66(CAGGTG,+,0.00),-42(CAGGTG,+,0.00),-33(CAGGTG,+,0.00),-9(CAGGTG,+,0.00),0(CAGGTG,+,0.00),57(CAGGTG,+,0.00)
chr14-6	chr14	31571476	31571776	-124(CAGCTG,+,0.00)	-44(CAGGTG,+,0.00),-33(CAGGTG,+,0.00),-22(CAGGTG,+,0.00),0(CAGGTG,+,0.00),11(CAGGTG,+,0.00),22(CAGGTG,+,0.00),33(CAGGTG,+,0.00)
chr7-2	chr7	29865240	29865540		-133(CAGGTG,+,0.00),-114(CAGGTG,+,0.00),-95(CAGGTG,+,0.00),-76(CAGGTG,+,0.00),-38(CAGGTG,+,0.00),0(CAGGTG,+,0.00),19(CAGGTG,+,0.00),38(CAGGTG,+,0.00),57(CAGGTG,+,0.00),76(CAGGTG,+,0.00),95(CAGGTG,+,0.00),133(CAGGTG,+,0.00)
chr14-7	chr14	121542897	121543197		-119(CAGGTG,+,0.00),-90(CAGGTG,+,0.00),-60(CAGGTG,+,0.00),-30(CAGGTG,+,0.00),0(CAGGTG,+,0.00),30(CAGGTG,+,0.00),51(CAGGTG,+,0.00),74(CAGGTG,+,0.00),120(CAGGTG,+,0.00)	-69(CACCTG,+,0.00),-39(CACCTG,+,0.00),-9(CACCTG,+,0.00),21(CACCTG,+,0.00),42(CACCTG,+,0.00),65(CACCTG,+,0.00),88(CACCTG,+,0.00),111(CACCTG,+,0.00)
chr15-3	chr15	99236137	99236437	-82(CAGCTG,+,0.00),-47(CAGCTG,+,0.00),-12(CAGCTG,+,0.00),23(CAGCTG,+,0.00),78(CAGCTG,+,0.00)	-70(CAGGTG,+,0.00),-35(CAGGTG,+,0.00),0(CAGGTG,+,0.00),35(CAGGTG,+,0.00)	-94(CACCTG,+,0.00),-59(CACCTG,+,0.00),-24(CACCTG,+,0.00),11(CACCTG,+,0.00)
chr12-3	chr12	105550456	105550756		-147(CAGGTG,+,0.00),-130(CAGGTG,+,0.00),-94(CAGGTG,+,0.00),-74(CAGGTG,+,0.00),-55(CAGGTG,+,0.00),-38(CAGGTG,+,0.00),-19(CAGGTG,+,0.00),0(CAGGTG,+,0.00),17(CAGGTG,+,0.00),36(CAGGTG,+,0.00),55(CAGGTG,+,0.00),75(CAGGTG,+,0.00),94(CAGGTG,+,0.00)
chr5-3	chr5	110372086	110372386		-54(CAGGTG,+,0.00),-39(CAGGTG,+,0.00),-15(CAGGTG,+,0.00),0(CAGGTG,+,0.00),16(CAGGTG,+,0.00),31(CAGGTG,+,0.00),45(CAGGTG,+,0.00),81(CAGGTG,+,0.00)
chr4-9	chr4	134972961	134973261	-135(CAGCTG,+,0.00),-90(CAGCTG,+,0.00),-60(CAGCTG,+,0.00),-30(CAGCTG,+,0.00),-15(CAGCTG,+,0.00),0(CAGCTG,+,0.00),90(CAGCTG,+,0.00),135(CAGCTG,+,0.00)		-150(CACCTG,+,0.00),-75(CACCTG,+,0.00),-45(CACCTG,+,0.00),15(CACCTG,+,0.00),30(CACCTG,+,0.00),60(CACCTG,+,0.00),75(CACCTG,+,0.00)
chr2-10	chr2	168423155	168423455		-80(CAGGTG,+,0.00),-64(CAGGTG,+,0.00),-48(CAGGTG,+,0.00),-32(CAGGTG,+,0.00),-16(CAGGTG,+,0.00),0(CAGGTG,+,0.00),16(CAGGTG,+,0.00),32(CAGGTG,+,0.00),48(CAGGTG,+,0.00),64(CAGGTG,+,0.00),80(CAGGTG,+,0.00),96(CAGGTG,+,0.00),112(CAGGTG,+,0.00),128(CAGGTG,+,0.00),144(CAGGTG,+,0.00)
chr15-4	chr15	78486589	78486889	-141(CAGCTG,+,0.00)	-115(CAGGTG,+,0.00),-92(CAGGTG,+,0.00),-69(CAGGTG,+,0.00),-46(CAGGTG,+,0.00),-23(CAGGTG,+,0.00),0(CAGGTG,+,0.00),20(CAGGTG,+,0.00),40(CAGGTG,+,0.00),57(CAGGTG,+,0.00),80(CAGGTG,+,0.00),100(CAGGTG,+,0.00)
chr10-2	chr10	85328027	85328327		-77(CAGGTG,+,0.00),-64(CAGGTG,+,0.00),-51(CAGGTG,+,0.00),-38(CAGGTG,+,0.00),-25(CAGGTG,+,0.00),0(CAGGTG,+,0.00),13(CAGGTG,+,0.00),26(CAGGTG,+,0.00),39(CAGGTG,+,0.00),52(CAGGTG,+,0.00)
chr17-13	chr17	34388112	34388412		0(CAGGTG,+,0.00)	-140(CACCTG,+,0.00),-124(CACCTG,+,0.00),-108(CACCTG,+,0.00),-92(CACCTG,+,0.00),-76(CACCTG,+,0.00),-60(CACCTG,+,0.00),-44(CACCTG,+,0.00),-28(CACCTG,+,0.00),-12(CACCTG,+,0.00)
chr2-12	chr2	169421440	169421740	-72(CAGCTG,+,0.00)	-108(CAGGTG,+,0.00),-84(CAGGTG,+,0.00),-60(CAGGTG,+,0.00),-48(CAGGTG,+,0.00),-36(CAGGTG,+,0.00),-24(CAGGTG,+,0.00),-12(CAGGTG,+,0.00),0(CAGGTG,+,0.00),12(CAGGTG,+,0.00),24(CAGGTG,+,0.00),36(CAGGTG,+,0.00),48(CAGGTG,+,0.00),60(CAGGTG,+,0.00),72(CAGGTG,+,0.00),84(CAGGTG,+,0.00),96(CAGGTG,+,0.00),108(CAGGTG,+,0.00),120(CAGGTG,+,0.00),132(CAGGTG,+,0.00)
chr8-5	chr8	70533214	70533514		-140(CAGGTG,+,0.00),-120(CAGGTG,+,0.00),-100(CAGGTG,+,0.00),-80(CAGGTG,+,0.00),-60(CAGGTG,+,0.00),-40(CAGGTG,+,0.00),-20(CAGGTG,+,0.00),0(CAGGTG,+,0.00),20(CAGGTG,+,0.00),40(CAGGTG,+,0.00),80(CAGGTG,+,0.00),100(CAGGTG,+,0.00),120(CAGGTG,+,0.00),140(CAGGTG,+,0.00)
chr6-4	chr6	97259961	97260261	-54(CAGCTG,+,0.00),-45(CAGCTG,+,0.00),-36(CAGCTG,+,0.00),-27(CAGCTG,+,0.00),-18(CAGCTG,+,0.00),-9(CAGCTG,+,0.00),0(CAGCTG,+,0.00),9(CAGCTG,+,0.00),18(CAGCTG,+,0.00),27(CAGCTG,+,0.00),36(CAGCTG,+,0.00),45(CAGCTG,+,0.00),54(CAGCTG,+,0.00),63(CAGCTG,+,0.00)
chr11-11	chr11	108119796	108120096		-32(CAGGTG,+,0.00),0(CAGGTG,+,0.00),32(CAGGTG,+,0.00),64(CAGGTG,+,0.00),96(CAGGTG,+,0.00)	-9(CACCTG,+,0.00),23(CACCTG,+,0.00),55(CACCTG,+,0.00),87(CACCTG,+,0.00),116(CACCTG,+,0.00)
chr4-11	chr4	140574950	140575250	-130(CAGCTG,+,0.00),-104(CAGCTG,+,0.00),-78(CAGCTG,+,0.00),-52(CAGCTG,+,0.00),-26(CAGCTG,+,0.00),0(CAGCTG,+,0.00),26(CAGCTG,+,0.00),52(CAGCTG,+,0.00)		-145(CACCTG,+,0.00),-119(CACCTG,+,0.00),-93(CACCTG,+,0.00),-67(CACCTG,+,0.00),-41(CACCTG,+,0.00),-15(CACCTG,+,0.00),11(CACCTG,+,0.00),37(CACCTG,+,0.00),63(CACCTG,+,0.00),93(CACCTG,+,0.00)
chr18-2	chr18	81669146	81669446		-102(CAGGTG,+,0.00),-79(CAGGTG,+,0.00),-68(CAGGTG,+,0.00),-45(CAGGTG,+,0.00),-11(CAGGTG,+,0.00),0(CAGGTG,+,0.00),23(CAGGTG,+,0.00),34(CAGGTG,+,0.00),57(CAGGTG,+,0.00),68(CAGGTG,+,0.00),91(CAGGTG,+,0.00),125(CAGGTG,+,0.00),136(CAGGTG,+,0.00)
chr2-13	chr2	18893358	18893658		-132(CAGGTG,+,0.00),-114(CAGGTG,+,0.00),-93(CAGGTG,+,0.00),-75(CAGGTG,+,0.00),-54(CAGGTG,+,0.00),-36(CAGGTG,+,0.00),-18(CAGGTG,+,0.00),0(CAGGTG,+,0.00),18(CAGGTG,+,0.00),36(CAGGTG,+,0.00),54(CAGGTG,+,0.00),72(CAGGTG,+,0.00),93(CAGGTG,+,0.00),111(CAGGTG,+,0.00)
chr16-5	chr16	13428895	13429195	-128(CAGCTG,+,0.00),-109(CAGCTG,+,0.00),-97(CAGCTG,+,0.00),-78(CAGCTG,+,0.00),-66(CAGCTG,+,0.00),-43(CAGCTG,+,0.00),-12(CAGCTG,+,0.00),0(CAGCTG,+,0.00),19(CAGCTG,+,0.00),32(CAGCTG,+,0.00),53(CAGCTG,+,0.00),64(CAGCTG,+,0.00),89(CAGCTG,+,0.00),121(CAGCTG,+,0.00)		108(CACCTG,+,0.00)
chr1-9	chr1	154758855	154759155		-48(CAGGTG,+,0.00),-32(CAGGTG,+,0.00),-16(CAGGTG,+,0.00),0(CAGGTG,+,0.00),32(CAGGTG,+,0.00),48(CAGGTG,+,0.00),64(CAGGTG,+,0.00),80(CAGGTG,+,0.00),96(CAGGTG,+,0.00),112(CAGGTG,+,0.00),128(CAGGTG,+,0.00),144(CAGGTG,+,0.00)
chr15-7	chr15	76012779	76013079	-72(CAGCTG,+,0.00),-30(CAGCTG,+,0.00),-15(CAGCTG,+,0.00),0(CAGCTG,+,0.00),15(CAGCTG,+,0.00),33(CAGCTG,+,0.00),45(CAGCTG,+,0.00),78(CAGCTG,+,0.00),99(CAGCTG,+,0.00)
chr5-4	chr5	111753564	111753864		-75(CAGGTG,+,0.00),-48(CAGGTG,+,0.00),-36(CAGGTG,+,0.00),-24(CAGGTG,+,0.00),-12(CAGGTG,+,0.00),0(CAGGTG,+,0.00),12(CAGGTG,+,0.00),24(CAGGTG,+,0.00),36(CAGGTG,+,0.00),48(CAGGTG,+,0.00),60(CAGGTG,+,0.00),72(CAGGTG,+,0.00),120(CAGGTG,+,0.00)
chr12-6	chr12	102344487	102344787		-140(CAGGTG,+,0.00),-126(CAGGTG,+,0.00),-112(CAGGTG,+,0.00),-98(CAGGTG,+,0.00),-84(CAGGTG,+,0.00),-70(CAGGTG,+,0.00),-56(CAGGTG,+,0.00),-42(CAGGTG,+,0.00),-28(CAGGTG,+,0.00),-14(CAGGTG,+,0.00),0(CAGGTG,+,0.00),14(CAGGTG,+,0.00),28(CAGGTG,+,0.00),42(CAGGTG,+,0.00),56(CAGGTG,+,0.00),70(CAGGTG,+,0.00),84(CAGGTG,+,0.00),98(CAGGTG,+,0.00),112(CAGGTG,+,0.00),126(CAGGTG,+,0.00),140(CAGGTG,+,0.00)
chr7-5	chr7	45226230	45226530		-39(CAGGTG,+,0.00),-26(CAGGTG,+,0.00),-13(CAGGTG,+,0.00),0(CAGGTG,+,0.00),26(CAGGTG,+,0.00),55(CAGGTG,+,0.00)
chr8-6	chr8	12519666	12519966		-60(CAGGTG,+,0.00),-54(CAGGTG,+,0.00),-48(CAGGTG,+,0.00),-42(CAGGTG,+,0.00),-36(CAGGTG,+,0.00),-30(CAGGTG,+,0.00),-24(CAGGTG,+,0.00),-18(CAGGTG,+,0.00),-12(CAGGTG,+,0.00),-6(CAGGTG,+,0.00),0(CAGGTG,+,0.00),6(CAGGTG,+,0.00),12(CAGGTG,+,0.00),18(CAGGTG,+,0.00),24(CAGGTG,+,0.00),30(CAGGTG,+,0.00)
chr9-22	chr9	41333193	41333493		-33(CAGGTG,+,0.00),-22(CAGGTG,+,0.00),-11(CAGGTG,+,0.00),0(CAGGTG,+,0.00),11(CAGGTG,+,0.00),22(CAGGTG,+,0.00),33(CAGGTG,+,0.00),44(CAGGTG,+,0.00),55(CAGGTG,+,0.00),66(CAGGTG,+,0.00)
chr11-17	chr11	99858143	99858443	-147(CAGCTG,+,0.00),-105(CAGCTG,+,0.00),-75(CAGCTG,+,0.00),-45(CAGCTG,+,0.00),-30(CAGCTG,+,0.00),-15(CAGCTG,+,0.00),0(CAGCTG,+,0.00),15(CAGCTG,+,0.00),30(CAGCTG,+,0.00),45(CAGCTG,+,0.00),72(CAGCTG,+,0.00),117(CAGCTG,+,0.00)		-90(CACCTG,+,0.00),-60(CACCTG,+,0.00)
chr11-18	chr11	99948798	99949098	-105(CAGCTG,+,0.00),-72(CAGCTG,+,0.00),-15(CAGCTG,+,0.00),0(CAGCTG,+,0.00),72(CAGCTG,+,0.00),129(CAGCTG,+,0.00)		-132(CACCTG,+,0.00),-60(CACCTG,+,0.00),-45(CACCTG,+,0.00),15(CACCTG,+,0.00),87(CACCTG,+,0.00),102(CACCTG,+,0.00)
chr10-3	chr10	77847571	77847871	-138(CAGCTG,+,0.00)	-114(CAGGTG,+,0.00),-93(CAGGTG,+,0.00),-38(CAGGTG,+,0.00),0(CAGGTG,+,0.00),19(CAGGTG,+,0.00),38(CAGGTG,+,0.00),57(CAGGTG,+,0.00),89(CAGGTG,+,0.00)
chr17-17	chr17	31422049	31422349	23(CAGCTG,+,0.00),34(CAGCTG,+,0.00),55(CAGCTG,+,0.00)	-11(CAGGTG,+,0.00),0(CAGGTG,+,0.00)
chr5-6	chr5	101925749	101926049		-116(CAGGTG,+,0.00),-94(CAGGTG,+,0.00),-72(CAGGTG,+,0.00),-28(CAGGTG,+,0.00),0(CAGGTG,+,0.00),17(CAGGTG,+,0.00),39(CAGGTG,+,0.00),67(CAGGTG,+,0.00),89(CAGGTG,+,0.00),117(CAGGTG,+,0.00)
chr8-10	chr8	13503302	13503602		-144(CAGGTG,+,0.00),-128(CAGGTG,+,0.00),-112(CAGGTG,+,0.00),-96(CAGGTG,+,0.00),-80(CAGGTG,+,0.00),-64(CAGGTG,+,0.00),-48(CAGGTG,+,0.00),-32(CAGGTG,+,0.00),-16(CAGGTG,+,0.00),0(CAGGTG,+,0.00),16(CAGGTG,+,0.00),32(CAGGTG,+,0.00),64(CAGGTG,+,0.00),80(CAGGTG,+,0.00),96(CAGGTG,+,0.00),112(CAGGTG,+,0.00)
chr1-10	chr1	179072193	179072493		-68(CAGGTG,+,0.00),-54(CAGGTG,+,0.00),-41(CAGGTG,+,0.00),-27(CAGGTG,+,0.00),-14(CAGGTG,+,0.00),0(CAGGTG,+,0.00),13(CAGGTG,+,0.00),27(CAGGTG,+,0.00),41(CAGGTG,+,0.00),54(CAGGTG,+,0.00),68(CAGGTG,+,0.00),95(CAGGTG,+,0.00),109(CAGGTG,+,0.00),123(CAGGTG,+,0.00),137(CAGGTG,+,0.00)
chr16-8	chr16	20522401	20522701	-130(CAGCTG,+,0.00),-118(CAGCTG,+,0.00),-86(CAGCTG,+,0.00),-53(CAGCTG,+,0.00),-21(CAGCTG,+,0.00),0(CAGCTG,+,0.00),12(CAGCTG,+,0.00),33(CAGCTG,+,0.00),45(CAGCTG,+,0.00),78(CAGCTG,+,0.00),110(CAGCTG,+,0.00),143(CAGCTG,+,0.00)
chr2-19	chr2	168023581	168023881		-144(CAGGTG,+,0.00),-128(CAGGTG,+,0.00),-112(CAGGTG,+,0.00),-96(CAGGTG,+,0.00),-64(CAGGTG,+,0.00),-32(CAGGTG,+,0.00),-16(CAGGTG,+,0.00),0(CAGGTG,+,0.00),16(CAGGTG,+,0.00),32(CAGGTG,+,0.00),64(CAGGTG,+,0.00),80(CAGGTG,+,0.00),96(CAGGTG,+,0.00),112(CAGGTG,+,0.00),144(CAGGTG,+,0.00)
chr2-17	chr2	105258482	105258782		-131(CAGGTG,+,0.00),-117(CAGGTG,+,0.00),-92(CAGGTG,+,0.00),-78(CAGGTG,+,0.00),-53(CAGGTG,+,0.00),-39(CAGGTG,+,0.00),0(CAGGTG,+,0.00),25(CAGGTG,+,0.00),39(CAGGTG,+,0.00),64(CAGGTG,+,0.00),78(CAGGTG,+,0.00),103(CAGGTG,+,0.00),117(CAGGTG,+,0.00),142(CAGGTG,+,0.00)
chr13-3	chr13	57949526	57949826		-67(CAGGTG,+,0.00),-54(CAGGTG,+,0.00),-42(CAGGTG,+,0.00),-25(CAGGTG,+,0.00),-12(CAGGTG,+,0.00),0(CAGGTG,+,0.00),17(CAGGTG,+,0.00),30(CAGGTG,+,0.00),42(CAGGTG,+,0.00)
chr8-11	chr8	111451909	111452209		-136(CAGGTG,+,0.00),-85(CAGGTG,+,0.00),-68(CAGGTG,+,0.00),-51(CAGGTG,+,0.00),-34(CAGGTG,+,0.00),0(CAGGTG,+,0.00),17(CAGGTG,+,0.00)
chr7-8	chr7	43777831	43778131		-44(CAGGTG,+,0.00),-33(CAGGTG,+,0.00),-22(CAGGTG,+,0.00),-11(CAGGTG,+,0.00),0(CAGGTG,+,0.00),11(CAGGTG,+,0.00),22(CAGGTG,+,0.00),33(CAGGTG,+,0.00),44(CAGGTG,+,0.00),91(CAGGTG,+,0.00)
chr10-6	chr10	90904197	90904497		-92(CAGGTG,+,0.00),-76(CAGGTG,+,0.00),-62(CAGGTG,+,0.00),-46(CAGGTG,+,0.00),-30(CAGGTG,+,0.00),-14(CAGGTG,+,0.00),0(CAGGTG,+,0.00),16(CAGGTG,+,0.00),30(CAGGTG,+,0.00),44(CAGGTG,+,0.00),58(CAGGTG,+,0.00),74(CAGGTG,+,0.00)
chr5-8	chr5	149427747	149428047	-62(CAGCTG,+,0.00),-31(CAGCTG,+,0.00),0(CAGCTG,+,0.00),31(CAGCTG,+,0.00),62(CAGCTG,+,0.00)	-51(CAGGTG,+,0.00),-20(CAGGTG,+,0.00),11(CAGGTG,+,0.00),42(CAGGTG,+,0.00),73(CAGGTG,+,0.00)
chr2-22	chr2	180761826	180762126		-147(CAGGTG,+,0.00),-131(CAGGTG,+,0.00),-115(CAGGTG,+,0.00),-100(CAGGTG,+,0.00),-84(CAGGTG,+,0.00),-16(CAGGTG,+,0.00),0(CAGGTG,+,0.00),15(CAGGTG,+,0.00),31(CAGGTG,+,0.00),46(CAGGTG,+,0.00),62(CAGGTG,+,0.00),77(CAGGTG,+,0.00),93(CAGGTG,+,0.00),109(CAGGTG,+,0.00)
chr4-16	chr4	119395490	119395790		-94(CAGGTG,+,0.00),-84(CAGGTG,+,0.00),-54(CAGGTG,+,0.00),-37(CAGGTG,+,0.00),0(CAGGTG,+,0.00),44(CAGGTG,+,0.00),64(CAGGTG,+,0.00),84(CAGGTG,+,0.00),134(CAGGTG,+,0.00)
chr7-10	chr7	64235351	64235651		-137(CAGGTG,+,0.00),-84(CAGGTG,+,0.00),-42(CAGGTG,+,0.00),0(CAGGTG,+,0.00),31(CAGGTG,+,0.00),42(CAGGTG,+,0.00),73(CAGGTG,+,0.00),115(CAGGTG,+,0.00),126(CAGGTG,+,0.00)	-144(CACCTG,+,0.00),-102(CACCTG,+,0.00),-60(CACCTG,+,0.00),-18(CACCTG,+,0.00),24(CACCTG,+,0.00),66(CACCTG,+,0.00),108(CACCTG,+,0.00)
chr10-7	chr10	28800915	28801215		-72(CAGGTG,+,0.00),-60(CAGGTG,+,0.00),-36(CAGGTG,+,0.00),-24(CAGGTG,+,0.00),-12(CAGGTG,+,0.00),0(CAGGTG,+,0.00),12(CAGGTG,+,0.00),24(CAGGTG,+,0.00),48(CAGGTG,+,0.00),60(CAGGTG,+,0.00),72(CAGGTG,+,0.00),84(CAGGTG,+,0.00),108(CAGGTG,+,0.00),120(CAGGTG,+,0.00)
chr16-10	chr16	93309026	93309326		-148(CAGGTG,+,0.00),-130(CAGGTG,+,0.00),-112(CAGGTG,+,0.00),-94(CAGGTG,+,0.00),-76(CAGGTG,+,0.00),-58(CAGGTG,+,0.00),-43(CAGGTG,+,0.00),-25(CAGGTG,+,0.00),-18(CAGGTG,+,0.00),0(CAGGTG,+,0.00),7(CAGGTG,+,0.00),22(CAGGTG,+,0.00),40(CAGGTG,+,0.00),58(CAGGTG,+,0.00),76(CAGGTG,+,0.00),109(CAGGTG,+,0.00),142(CAGGTG,+,0.00)
chr16-9	chr16	9030068	9030368		0(CAGGTG,+,0.00)	-42(CACCTG,+,0.00),-31(CACCTG,+,0.00),-20(CACCTG,+,0.00)
chr3-8	chr3	84938056	84938356	-24(CAGCTG,+,0.00),0(CAGCTG,+,0.00)
chr15-10	chr15	36507823	36508123	65(CAGCTG,+,0.00)	-65(CAGGTG,+,0.00),-38(CAGGTG,+,0.00),-19(CAGGTG,+,0.00),0(CAGGTG,+,0.00),19(CAGGTG,+,0.00),57(CAGGTG,+,0.00),76(CAGGTG,+,0.00)
chr17-20	chr17	49291000	49291300		-96(CAGGTG,+,0.00),-78(CAGGTG,+,0.00),-72(CAGGTG,+,0.00),-66(CAGGTG,+,0.00),-60(CAGGTG,+,0.00),-54(CAGGTG,+,0.00),-48(CAGGTG,+,0.00),-42(CAGGTG,+,0.00),-36(CAGGTG,+,0.00),-30(CAGGTG,+,0.00),-12(CAGGTG,+,0.00),-6(CAGGTG,+,0.00),0(CAGGTG,+,0.00),6(CAGGTG,+,0.00),12(CAGGTG,+,0.00),42(CAGGTG,+,0.00),48(CAGGTG,+,0.00),72(CAGGTG,+,0.00)
chr10-8	chr10	42163714	42164014		-63(CAGGTG,+,0.00),-39(CAGGTG,+,0.00),-24(CAGGTG,+,0.00),-8(CAGGTG,+,0.00),0(CAGGTG,+,0.00),9(CAGGTG,+,0.00),33(CAGGTG,+,0.00),48(CAGGTG,+,0.00),56(CAGGTG,+,0.00),80(CAGGTG,+,0.00),88(CAGGTG,+,0.00),97(CAGGTG,+,0.00),112(CAGGTG,+,0.00),120(CAGGTG,+,0.00),129(CAGGTG,+,0.00),144(CAGGTG,+,0.00)
chr17-23	chr17	46093185	46093485		-77(CAGGTG,+,0.00),-59(CAGGTG,+,0.00),-47(CAGGTG,+,0.00),-29(CAGGTG,+,0.00),-17(CAGGTG,+,0.00),0(CAGGTG,+,0.00),29(CAGGTG,+,0.00),41(CAGGTG,+,0.00),59(CAGGTG,+,0.00),71(CAGGTG,+,0.00),101(CAGGTG,+,0.00)
chr9-37	chr9	62675843	62676143		-144(CAGGTG,+,0.00),-128(CAGGTG,+,0.00),-112(CAGGTG,+,0.00),-96(CAGGTG,+,0.00),-80(CAGGTG,+,0.00),-64(CAGGTG,+,0.00),-48(CAGGTG,+,0.00),-32(CAGGTG,+,0.00),0(CAGGTG,+,0.00),16(CAGGTG,+,0.00),32(CAGGTG,+,0.00),48(CAGGTG,+,0.00),64(CAGGTG,+,0.00)
chr8-13	chr8	105833782	105834082	-96(CAGCTG,+,0.00),-80(CAGCTG,+,0.00),-64(CAGCTG,+,0.00),-48(CAGCTG,+,0.00),-32(CAGCTG,+,0.00),-16(CAGCTG,+,0.00),0(CAGCTG,+,0.00),16(CAGCTG,+,0.00),32(CAGCTG,+,0.00),64(CAGCTG,+,0.00),80(CAGCTG,+,0.00)		110(CACCTG,+,0.00)
chr17-24	chr17	49717665	49717965		-144(CAGGTG,+,0.00),-128(CAGGTG,+,0.00),-122(CAGGTG,+,0.00),-112(CAGGTG,+,0.00),-96(CAGGTG,+,0.00),-80(CAGGTG,+,0.00),-58(CAGGTG,+,0.00),-48(CAGGTG,+,0.00),-42(CAGGTG,+,0.00),-32(CAGGTG,+,0.00),-26(CAGGTG,+,0.00),-16(CAGGTG,+,0.00),0(CAGGTG,+,0.00),6(CAGGTG,+,0.00),16(CAGGTG,+,0.00),22(CAGGTG,+,0.00),28(CAGGTG,+,0.00),38(CAGGTG,+,0.00),54(CAGGTG,+,0.00),70(CAGGTG,+,0.00),76(CAGGTG,+,0.00)
chr19-5	chr19	31255864	31256164	-45(CAGCTG,+,0.00),-36(CAGCTG,+,0.00),-27(CAGCTG,+,0.00),-9(CAGCTG,+,0.00),0(CAGCTG,+,0.00),9(CAGCTG,+,0.00),18(CAGCTG,+,0.00),27(CAGCTG,+,0.00)
chr5-10	chr5	37729026	37729326		-134(CAGGTG,+,0.00),-92(CAGGTG,+,0.00),-76(CAGGTG,+,0.00),-56(CAGGTG,+,0.00),-36(CAGGTG,+,0.00),-16(CAGGTG,+,0.00),0(CAGGTG,+,0.00),16(CAGGTG,+,0.00),36(CAGGTG,+,0.00),52(CAGGTG,+,0.00),68(CAGGTG,+,0.00),100(CAGGTG,+,0.00),116(CAGGTG,+,0.00)
chr4-19	chr4	45139915	45140215		-66(CAGGTG,+,0.00),-33(CAGGTG,+,0.00),0(CAGGTG,+,0.00),33(CAGGTG,+,0.00),64(CAGGTG,+,0.00),97(CAGGTG,+,0.00),130(CAGGTG,+,0.00)	-81(CACCTG,+,0.00),-48(CACCTG,+,0.00),-15(CACCTG,+,0.00),18(CACCTG,+,0.00),51(CACCTG,+,0.00),82(CACCTG,+,0.00),115(CACCTG,+,0.00)
chr11-28	chr11	118376420	118376720		-74(CAGGTG,+,0.00),-42(CAGGTG,+,0.00),0(CAGGTG,+,0.00),32(CAGGTG,+,0.00),74(CAGGTG,+,0.00),110(CAGGTG,+,0.00)	-86(CACCTG,+,0.00),-54(CACCTG,+,0.00),-12(CACCTG,+,0.00),20(CACCTG,+,0.00),62(CACCTG,+,0.00),98(CACCTG,+,0.00)
chr3-10	chr3	54678840	54679140	-105(CAGCTG,+,0.00),-42(CAGCTG,+,0.00),-21(CAGCTG,+,0.00),0(CAGCTG,+,0.00),21(CAGCTG,+,0.00),42(CAGCTG,+,0.00),63(CAGCTG,+,0.00)
chr19-7	chr19	45024731	45025031	-66(CAGCTG,+,0.00),-57(CAGCTG,+,0.00),-42(CAGCTG,+,0.00),0(CAGCTG,+,0.00),21(CAGCTG,+,0.00)	-51(CAGGTG,+,0.00)
chr11-27	chr11	99583278	99583578	-120(CAGCTG,+,0.00),-105(CAGCTG,+,0.00),-90(CAGCTG,+,0.00),-60(CAGCTG,+,0.00),-30(CAGCTG,+,0.00),0(CAGCTG,+,0.00),30(CAGCTG,+,0.00),60(CAGCTG,+,0.00),75(CAGCTG,+,0.00),90(CAGCTG,+,0.00)		-75(CACCTG,+,0.00),-45(CACCTG,+,0.00),-15(CACCTG,+,0.00),15(CACCTG,+,0.00),45(CACCTG,+,0.00)
chr17-29	chr17	8346936	8347236	-135(CAGCTG,+,0.00),-120(CAGCTG,+,0.00),-105(CAGCTG,+,0.00),-75(CAGCTG,+,0.00),-60(CAGCTG,+,0.00),-45(CAGCTG,+,0.00),-30(CAGCTG,+,0.00),-15(CAGCTG,+,0.00),0(CAGCTG,+,0.00),15(CAGCTG,+,0.00),30(CAGCTG,+,0.00),60(CAGCTG,+,0.00),75(CAGCTG,+,0.00),90(CAGCTG,+,0.00),105(CAGCTG,+,0.00),120(CAGCTG,+,0.00),135(CAGCTG,+,0.00)		-90(CACCTG,+,0.00),45(CACCTG,+,0.00)
chr4-21	chr4	129862440	129862740		0(CAGGTG,+,0.00),21(CAGGTG,+,0.00)	142(CACCTG,+,0.00)
chr2-32	chr2	31869714	31870014	108(CAGCTG,+,0.00)	-140(CAGGTG,+,0.00),-100(CAGGTG,+,0.00),-80(CAGGTG,+,0.00),-60(CAGGTG,+,0.00),-40(CAGGTG,+,0.00),-20(CAGGTG,+,0.00),0(CAGGTG,+,0.00),17(CAGGTG,+,0.00),34(CAGGTG,+,0.00),54(CAGGTG,+,0.00)
chr11-29	chr11	59640306	59640606		-134(CAGGTG,+,0.00),-115(CAGGTG,+,0.00),-96(CAGGTG,+,0.00),-77(CAGGTG,+,0.00),-58(CAGGTG,+,0.00),-38(CAGGTG,+,0.00),-19(CAGGTG,+,0.00),0(CAGGTG,+,0.00),19(CAGGTG,+,0.00),57(CAGGTG,+,0.00),76(CAGGTG,+,0.00),95(CAGGTG,+,0.00),114(CAGGTG,+,0.00),133(CAGGTG,+,0.00)
chr10-12	chr10	72588597	72588897		-31(CAGGTG,+,0.00),-19(CAGGTG,+,0.00),0(CAGGTG,+,0.00),19(CAGGTG,+,0.00),31(CAGGTG,+,0.00),50(CAGGTG,+,0.00)
chr1-14	chr1	120210858	120211158	-25(CAGCTG,+,0.00),11(CAGCTG,+,0.00),43(CAGCTG,+,0.00),79(CAGCTG,+,0.00)	-36(CAGGTG,+,0.00),0(CAGGTG,+,0.00),32(CAGGTG,+,0.00),68(CAGGTG,+,0.00)	-42(CACCTG,+,0.00),26(CACCTG,+,0.00)
chr8-14	chr8	27204330	27204630		-54(CAGGTG,+,0.00),-42(CAGGTG,+,0.00),-30(CAGGTG,+,0.00),-24(CAGGTG,+,0.00),-12(CAGGTG,+,0.00),0(CAGGTG,+,0.00),12(CAGGTG,+,0.00),36(CAGGTG,+,0.00),54(CAGGTG,+,0.00),60(CAGGTG,+,0.00)
chr5-11	chr5	26412967	26413267	-69(CAGCTG,+,0.00),-42(CAGCTG,+,0.00),-15(CAGCTG,+,0.00),12(CAGCTG,+,0.00)	-81(CAGGTG,+,0.00),-54(CAGGTG,+,0.00),-27(CAGGTG,+,0.00),0(CAGGTG,+,0.00),27(CAGGTG,+,0.00)	119(CACCTG,+,0.00)
chr11-33	chr11	99634722	99635022	-90(CAGCTG,+,0.00),-45(CAGCTG,+,0.00),-30(CAGCTG,+,0.00),-15(CAGCTG,+,0.00),0(CAGCTG,+,0.00),75(CAGCTG,+,0.00),90(CAGCTG,+,0.00),120(CAGCTG,+,0.00)		-75(CACCTG,+,0.00),-60(CACCTG,+,0.00)
chr11-38	chr11	99591069	99591369	-150(CAGCTG,+,0.00),-135(CAGCTG,+,0.00),-120(CAGCTG,+,0.00),-75(CAGCTG,+,0.00),-60(CAGCTG,+,0.00),-45(CAGCTG,+,0.00),-30(CAGCTG,+,0.00),0(CAGCTG,+,0.00),15(CAGCTG,+,0.00),30(CAGCTG,+,0.00)	42(CAGGTG,+,0.00)
chr10-14	chr10	77690393	77690693	-45(CAGCTG,+,0.00),-30(CAGCTG,+,0.00),0(CAGCTG,+,0.00),15(CAGCTG,+,0.00),30(CAGCTG,+,0.00),57(CAGCTG,+,0.00)		110(CACCTG,+,0.00)
chr4-23	chr4	154183150	154183450		-142(CAGGTG,+,0.00),-131(CAGGTG,+,0.00),-115(CAGGTG,+,0.00),-104(CAGGTG,+,0.00),-88(CAGGTG,+,0.00),-77(CAGGTG,+,0.00),-61(CAGGTG,+,0.00),-50(CAGGTG,+,0.00),-27(CAGGTG,+,0.00),-11(CAGGTG,+,0.00),0(CAGGTG,+,0.00),23(CAGGTG,+,0.00),66(CAGGTG,+,0.00),77(CAGGTG,+,0.00),104(CAGGTG,+,0.00),120(CAGGTG,+,0.00)
chr14-15	chr14	47356658	47356958	-27(CAGCTG,+,0.00),-18(CAGCTG,+,0.00),-9(CAGCTG,+,0.00),0(CAGCTG,+,0.00),8(CAGCTG,+,0.00),40(CAGCTG,+,0.00)
chr5-12	chr5	107386511	107386811		-135(CAGGTG,+,0.00),-108(CAGGTG,+,0.00),-81(CAGGTG,+,0.00),-54(CAGGTG,+,0.00),-27(CAGGTG,+,0.00),0(CAGGTG,+,0.00),27(CAGGTG,+,0.00),54(CAGGTG,+,0.00),108(CAGGTG,+,0.00),135(CAGGTG,+,0.00)
chr2-35	chr2	31436270	31436570		-120(CAGGTG,+,0.00),-100(CAGGTG,+,0.00),-80(CAGGTG,+,0.00),-60(CAGGTG,+,0.00),-40(CAGGTG,+,0.00),-20(CAGGTG,+,0.00),0(CAGGTG,+,0.00),20(CAGGTG,+,0.00),40(CAGGTG,+,0.00),60(CAGGTG,+,0.00),80(CAGGTG,+,0.00),100(CAGGTG,+,0.00)
chr9-44	chr9	120291811	120292111		0(CAGGTG,+,0.00),6(CAGGTG,+,0.00),12(CAGGTG,+,0.00),18(CAGGTG,+,0.00),24(CAGGTG,+,0.00),30(CAGGTG,+,0.00),36(CAGGTG,+,0.00),42(CAGGTG,+,0.00),48(CAGGTG,+,0.00),54(CAGGTG,+,0.00),60(CAGGTG,+,0.00),66(CAGGTG,+,0.00),72(CAGGTG,+,0.00),78(CAGGTG,+,0.00),84(CAGGTG,+,0.00),90(CAGGTG,+,0.00),96(CAGGTG,+,0.00),108(CAGGTG,+,0.00)
chr2-33	chr2	166389618	166389918		-136(CAGGTG,+,0.00),-107(CAGGTG,+,0.00),-78(CAGGTG,+,0.00),-58(CAGGTG,+,0.00),-29(CAGGTG,+,0.00),0(CAGGTG,+,0.00),29(CAGGTG,+,0.00),58(CAGGTG,+,0.00),87(CAGGTG,+,0.00),116(CAGGTG,+,0.00)
chr2-36	chr2	34073339	34073639	-82(CAGCTG,+,0.00),-73(CAGCTG,+,0.00),-64(CAGCTG,+,0.00),-46(CAGCTG,+,0.00),-37(CAGCTG,+,0.00),-28(CAGCTG,+,0.00),0(CAGCTG,+,0.00)
chr2-37	chr2	152117152	152117452	-54(CAGCTG,+,0.00)	-26(CAGGTG,+,0.00),-13(CAGGTG,+,0.00),0(CAGGTG,+,0.00),14(CAGGTG,+,0.00),27(CAGGTG,+,0.00),55(CAGGTG,+,0.00),69(CAGGTG,+,0.00),84(CAGGTG,+,0.00),99(CAGGTG,+,0.00)	-108(CACCTG,+,0.00)
chr5-14	chr5	116280488	116280788	-106(CAGCTG,+,0.00),-51(CAGCTG,+,0.00),0(CAGCTG,+,0.00),52(CAGCTG,+,0.00),71(CAGCTG,+,0.00)	80(CAGGTG,+,0.00)
chr17-34	chr17	36355444	36355744	0(CAGCTG,+,0.00),137(CAGCTG,+,0.00)		-68(CACCTG,+,0.00),50(CACCTG,+,0.00)
chr3-15	chr3	86993150	86993450		-90(CAGGTG,+,0.00),-75(CAGGTG,+,0.00),-60(CAGGTG,+,0.00),-45(CAGGTG,+,0.00),-30(CAGGTG,+,0.00),-15(CAGGTG,+,0.00),0(CAGGTG,+,0.00),15(CAGGTG,+,0.00),30(CAGGTG,+,0.00),45(CAGGTG,+,0.00),60(CAGGTG,+,0.00),75(CAGGTG,+,0.00),90(CAGGTG,+,0.00),105(CAGGTG,+,0.00),120(CAGGTG,+,0.00),135(CAGGTG,+,0.00)
chr9-49	chr9	121932550	121932850		-48(CAGGTG,+,0.00),-36(CAGGTG,+,0.00),-24(CAGGTG,+,0.00),-12(CAGGTG,+,0.00),0(CAGGTG,+,0.00),12(CAGGTG,+,0.00),27(CAGGTG,+,0.00),39(CAGGTG,+,0.00),51(CAGGTG,+,0.00),66(CAGGTG,+,0.00)
chr2-41	chr2	105257702	105258002		-117(CAGGTG,+,0.00),-92(CAGGTG,+,0.00),-78(CAGGTG,+,0.00),-53(CAGGTG,+,0.00),-39(CAGGTG,+,0.00),0(CAGGTG,+,0.00),25(CAGGTG,+,0.00),39(CAGGTG,+,0.00),78(CAGGTG,+,0.00)
chr16-16	chr16	30050899	30051199	0(CAGCTG,+,0.00),43(CAGCTG,+,0.00)	-50(CAGGTG,+,0.00),-38(CAGGTG,+,0.00)	29(CACCTG,+,0.00),51(CACCTG,+,0.00)
chr10-20	chr10	111191051	111191351		-32(CAGGTG,+,0.00),-16(CAGGTG,+,0.00),0(CAGGTG,+,0.00),16(CAGGTG,+,0.00),32(CAGGTG,+,0.00),48(CAGGTG,+,0.00),64(CAGGTG,+,0.00),80(CAGGTG,+,0.00),128(CAGGTG,+,0.00),144(CAGGTG,+,0.00)
chr12-15	chr12	80213841	80214141	-51(CAGCTG,+,0.00),-24(CAGCTG,+,0.00),67(CAGCTG,+,0.00)	0(CAGGTG,+,0.00)
chr10-19	chr10	57675765	57676065	-123(CAGCTG,+,0.00),-86(CAGCTG,+,0.00),-74(CAGCTG,+,0.00),-16(CAGCTG,+,0.00),0(CAGCTG,+,0.00),21(CAGCTG,+,0.00),37(CAGCTG,+,0.00),58(CAGCTG,+,0.00),95(CAGCTG,+,0.00),111(CAGCTG,+,0.00)	-53(CAGGTG,+,0.00)
chr15-15	chr15	101116929	101117229		-56(CAGGTG,+,0.00),-42(CAGGTG,+,0.00),-28(CAGGTG,+,0.00),0(CAGGTG,+,0.00),14(CAGGTG,+,0.00),28(CAGGTG,+,0.00),42(CAGGTG,+,0.00),56(CAGGTG,+,0.00),125(CAGGTG,+,0.00)
chr12-16	chr12	99067193	99067493	-90(CAGCTG,+,0.00),-60(CAGCTG,+,0.00),-30(CAGCTG,+,0.00),0(CAGCTG,+,0.00),30(CAGCTG,+,0.00),60(CAGCTG,+,0.00),90(CAGCTG,+,0.00)		-102(CACCTG,+,0.00),-72(CACCTG,+,0.00),-42(CACCTG,+,0.00),-12(CACCTG,+,0.00),18(CACCTG,+,0.00),48(CACCTG,+,0.00),78(CACCTG,+,0.00)
chr11-48	chr11	69459850	69460150	-80(CAGCTG,+,0.00),-64(CAGCTG,+,0.00),-48(CAGCTG,+,0.00),-32(CAGCTG,+,0.00),0(CAGCTG,+,0.00),16(CAGCTG,+,0.00),32(CAGCTG,+,0.00),48(CAGCTG,+,0.00),64(CAGCTG,+,0.00),80(CAGCTG,+,0.00),96(CAGCTG,+,0.00),112(CAGCTG,+,0.00),128(CAGCTG,+,0.00),144(CAGCTG,+,0.00)
chr11-72	chr11	52479582	52479882	-60(CAGCTG,+,0.00)	0(CAGGTG,+,0.00)	-96(CACCTG,+,0.00),-48(CACCTG,+,0.00),12(CACCTG,+,0.00),24(CACCTG,+,0.00),60(CACCTG,+,0.00),108(CACCTG,+,0.00),132(CACCTG,+,0.00),144(CACCTG,+,0.00)
chr16-17	chr16	32117776	32118076		-42(CAGGTG,+,0.00),-14(CAGGTG,+,0.00),-6(CAGGTG,+,0.00),0(CAGGTG,+,0.00),19(CAGGTG,+,0.00),52(CAGGTG,+,0.00)	-55(CACCTG,+,0.00),-31(CACCTG,+,0.00)
chr18-9	chr18	83255940	83256240		-111(CAGGTG,+,0.00),-99(CAGGTG,+,0.00),-68(CAGGTG,+,0.00),-56(CAGGTG,+,0.00),-50(CAGGTG,+,0.00),-19(CAGGTG,+,0.00),0(CAGGTG,+,0.00),12(CAGGTG,+,0.00),24(CAGGTG,+,0.00),30(CAGGTG,+,0.00),36(CAGGTG,+,0.00),42(CAGGTG,+,0.00),53(CAGGTG,+,0.00),77(CAGGTG,+,0.00),92(CAGGTG,+,0.00),104(CAGGTG,+,0.00),116(CAGGTG,+,0.00),122(CAGGTG,+,0.00),128(CAGGTG,+,0.00),134(CAGGTG,+,0.00),145(CAGGTG,+,0.00)
chr1-23	chr1	187171958	187172258	-40(CAGCTG,+,0.00),-20(CAGCTG,+,0.00),0(CAGCTG,+,0.00),20(CAGCTG,+,0.00),40(CAGCTG,+,0.00),60(CAGCTG,+,0.00),80(CAGCTG,+,0.00),100(CAGCTG,+,0.00),120(CAGCTG,+,0.00),140(CAGCTG,+,0.00)
chr5-16	chr5	113217678	113217978		-131(CAGGTG,+,0.00),-123(CAGGTG,+,0.00),-109(CAGGTG,+,0.00),-65(CAGGTG,+,0.00),-21(CAGGTG,+,0.00),0(CAGGTG,+,0.00),22(CAGGTG,+,0.00),44(CAGGTG,+,0.00),66(CAGGTG,+,0.00),87(CAGGTG,+,0.00),130(CAGGTG,+,0.00)
chr5-20	chr5	149757137	149757437		-150(CAGGTG,+,0.00),-120(CAGGTG,+,0.00),-105(CAGGTG,+,0.00),-90(CAGGTG,+,0.00),-60(CAGGTG,+,0.00),-45(CAGGTG,+,0.00),-30(CAGGTG,+,0.00),-15(CAGGTG,+,0.00),0(CAGGTG,+,0.00),15(CAGGTG,+,0.00),30(CAGGTG,+,0.00),45(CAGGTG,+,0.00),60(CAGGTG,+,0.00),90(CAGGTG,+,0.00),113(CAGGTG,+,0.00)
chr4-30	chr4	130282873	130283173	-52(CAGCTG,+,0.00),-38(CAGCTG,+,0.00),0(CAGCTG,+,0.00)	-26(CAGGTG,+,0.00)
chr1-24	chr1	43136491	43136791	-94(CAGCTG,+,0.00),-75(CAGCTG,+,0.00),-56(CAGCTG,+,0.00),-37(CAGCTG,+,0.00),-18(CAGCTG,+,0.00),0(CAGCTG,+,0.00),18(CAGCTG,+,0.00),37(CAGCTG,+,0.00),55(CAGCTG,+,0.00),73(CAGCTG,+,0.00),92(CAGCTG,+,0.00),110(CAGCTG,+,0.00),129(CAGCTG,+,0.00)
chr16-18	chr16	21678860	21679160	-138(CAGCTG,+,0.00),-65(CAGCTG,+,0.00),-18(CAGCTG,+,0.00),55(CAGCTG,+,0.00),79(CAGCTG,+,0.00),126(CAGCTG,+,0.00)	-144(CAGGTG,+,0.00),-113(CAGGTG,+,0.00),-95(CAGGTG,+,0.00),-89(CAGGTG,+,0.00),-71(CAGGTG,+,0.00),-47(CAGGTG,+,0.00),0(CAGGTG,+,0.00),31(CAGGTG,+,0.00),73(CAGGTG,+,0.00),97(CAGGTG,+,0.00)
chr11-89	chr11	99597813	99598113	-30(CAGCTG,+,0.00),-15(CAGCTG,+,0.00),0(CAGCTG,+,0.00),30(CAGCTG,+,0.00)	15(CAGGTG,+,0.00)	40(CACCTG,+,0.00)
chr12-19	chr12	99272835	99273135	-121(CAGCTG,+,0.00),-91(CAGCTG,+,0.00),-60(CAGCTG,+,0.00),-30(CAGCTG,+,0.00),0(CAGCTG,+,0.00),30(CAGCTG,+,0.00),60(CAGCTG,+,0.00),91(CAGCTG,+,0.00),121(CAGCTG,+,0.00)
chr8-24	chr8	122698413	122698713	0(CAGCTG,+,0.00),32(CAGCTG,+,0.00)		-36(CACCTG,+,0.00),23(CACCTG,+,0.00)
chr1-26	chr1	27108791	27109091		-45(CAGGTG,+,0.00),-30(CAGGTG,+,0.00),-15(CAGGTG,+,0.00),0(CAGGTG,+,0.00),15(CAGGTG,+,0.00),30(CAGGTG,+,0.00),45(CAGGTG,+,0.00),60(CAGGTG,+,0.00),75(CAGGTG,+,0.00),90(CAGGTG,+,0.00)
chr14-22	chr14	62425271	62425571	-37(CAGCTG,+,0.00)	-116(CAGGTG,+,0.00),0(CAGGTG,+,0.00)	14(CACCTG,+,0.00)
chr8-23	chr8	84350980	84351280	-96(CAGCTG,+,0.00),19(CAGCTG,+,0.00),79(CAGCTG,+,0.00)	0(CAGGTG,+,0.00)	-19(CACCTG,+,0.00)
chr9-53	chr9	61366271	61366571		-56(CAGGTG,+,0.00),0(CAGGTG,+,0.00)	-21(CACCTG,+,0.00),32(CACCTG,+,0.00)
chr11-104	chr11	99864694	99864994	-117(CAGCTG,+,0.00),-72(CAGCTG,+,0.00),-45(CAGCTG,+,0.00),-30(CAGCTG,+,0.00),-15(CAGCTG,+,0.00),0(CAGCTG,+,0.00),15(CAGCTG,+,0.00),45(CAGCTG,+,0.00),87(CAGCTG,+,0.00)	30(CAGGTG,+,0.00)
chr8-25	chr8	72590643	72590943		-39(CAGGTG,+,0.00),-26(CAGGTG,+,0.00),-13(CAGGTG,+,0.00),0(CAGGTG,+,0.00),13(CAGGTG,+,0.00)	26(CACCTG,+,0.00)
chr12-18	chr12	84729649	84729949		-108(CAGGTG,+,0.00),-90(CAGGTG,+,0.00),-72(CAGGTG,+,0.00),-54(CAGGTG,+,0.00),-36(CAGGTG,+,0.00),-18(CAGGTG,+,0.00),0(CAGGTG,+,0.00),18(CAGGTG,+,0.00),36(CAGGTG,+,0.00),54(CAGGTG,+,0.00),72(CAGGTG,+,0.00),90(CAGGTG,+,0.00),108(CAGGTG,+,0.00),126(CAGGTG,+,0.00)
chr7-29	chr7	19951826	19952126	0(CAGCTG,+,0.00),14(CAGCTG,+,0.00),28(CAGCTG,+,0.00),70(CAGCTG,+,0.00),84(CAGCTG,+,0.00),98(CAGCTG,+,0.00)	-96(CAGGTG,+,0.00)	-103(CACCTG,+,0.00)
chr7-28	chr7	35366199	35366499		0(CAGGTG,+,0.00),37(CAGGTG,+,0.00),74(CAGGTG,+,0.00)	-19(CACCTG,+,0.00),18(CACCTG,+,0.00),55(CACCTG,+,0.00),90(CACCTG,+,0.00)
chr5-23	chr5	35211443	35211743		-42(CAGGTG,+,0.00),-12(CAGGTG,+,0.00),0(CAGGTG,+,0.00),12(CAGGTG,+,0.00),48(CAGGTG,+,0.00),60(CAGGTG,+,0.00),84(CAGGTG,+,0.00),96(CAGGTG,+,0.00)
chr11-113	chr11	99785265	99785565	-132(CAGCTG,+,0.00),-117(CAGCTG,+,0.00),-75(CAGCTG,+,0.00),-60(CAGCTG,+,0.00),0(CAGCTG,+,0.00),15(CAGCTG,+,0.00),30(CAGCTG,+,0.00),45(CAGCTG,+,0.00),90(CAGCTG,+,0.00)	-45(CAGGTG,+,0.00),60(CAGGTG,+,0.00)
chr15-22	chr15	88189392	88189692	-86(CAGCTG,+,0.00),-41(CAGCTG,+,0.00),-29(CAGCTG,+,0.00),-12(CAGCTG,+,0.00),0(CAGCTG,+,0.00),17(CAGCTG,+,0.00),29(CAGCTG,+,0.00),46(CAGCTG,+,0.00),58(CAGCTG,+,0.00),104(CAGCTG,+,0.00),145(CAGCTG,+,0.00)
chr15-20	chr15	38251055	38251355		-139(CAGGTG,+,0.00),-106(CAGGTG,+,0.00),-78(CAGGTG,+,0.00),-49(CAGGTG,+,0.00),-29(CAGGTG,+,0.00),0(CAGGTG,+,0.00),19(CAGGTG,+,0.00),47(CAGGTG,+,0.00),67(CAGGTG,+,0.00),91(CAGGTG,+,0.00),109(CAGGTG,+,0.00)
chr3-19	chr3	100925233	100925533	-110(CAGCTG,+,0.00),-39(CAGCTG,+,0.00),0(CAGCTG,+,0.00),15(CAGCTG,+,0.00),24(CAGCTG,+,0.00)
chr7-30	chr7	81478322	81478622	-17(CAGCTG,+,0.00),0(CAGCTG,+,0.00)		30(CACCTG,+,0.00)
chr2-49	chr2	170465605	170465905		-60(CAGGTG,+,0.00),-30(CAGGTG,+,0.00),0(CAGGTG,+,0.00),30(CAGGTG,+,0.00),60(CAGGTG,+,0.00),98(CAGGTG,+,0.00)	-44(CACCTG,+,0.00),-14(CACCTG,+,0.00),16(CACCTG,+,0.00),46(CACCTG,+,0.00)
chr5-22	chr5	114166239	114166539		-91(CAGGTG,+,0.00),-78(CAGGTG,+,0.00),-39(CAGGTG,+,0.00),-26(CAGGTG,+,0.00),-13(CAGGTG,+,0.00),0(CAGGTG,+,0.00),26(CAGGTG,+,0.00)
chr5-25	chr5	101095526	101095826	-30(CAGCTG,+,0.00),-9(CAGCTG,+,0.00),29(CAGCTG,+,0.00),74(CAGCTG,+,0.00)	-42(CAGGTG,+,0.00),-21(CAGGTG,+,0.00),0(CAGGTG,+,0.00)	12(CACCTG,+,0.00)
chr16-21	chr16	91067163	91067463	-77(CAGCTG,+,0.00),-37(CAGCTG,+,0.00),0(CAGCTG,+,0.00),38(CAGCTG,+,0.00),81(CAGCTG,+,0.00)	-83(CAGGTG,+,0.00),-43(CAGGTG,+,0.00),-6(CAGGTG,+,0.00)	-97(CACCTG,+,0.00),-57(CACCTG,+,0.00),18(CACCTG,+,0.00),61(CACCTG,+,0.00),101(CACCTG,+,0.00)
chr4-33	chr4	48036258	48036558		-132(CAGGTG,+,0.00),-109(CAGGTG,+,0.00),-87(CAGGTG,+,0.00),-65(CAGGTG,+,0.00),-45(CAGGTG,+,0.00),-23(CAGGTG,+,0.00),0(CAGGTG,+,0.00),20(CAGGTG,+,0.00),42(CAGGTG,+,0.00),63(CAGGTG,+,0.00),84(CAGGTG,+,0.00)
chr17-42	chr17	32211523	32211823	-129(CAGCTG,+,0.00),-86(CAGCTG,+,0.00),-43(CAGCTG,+,0.00),0(CAGCTG,+,0.00),43(CAGCTG,+,0.00),125(CAGCTG,+,0.00)
chr12-22	chr12	104644738	104645038		-144(CAGGTG,+,0.00),-116(CAGGTG,+,0.00),-87(CAGGTG,+,0.00),-58(CAGGTG,+,0.00),-29(CAGGTG,+,0.00),0(CAGGTG,+,0.00),29(CAGGTG,+,0.00),58(CAGGTG,+,0.00),87(CAGGTG,+,0.00),116(CAGGTG,+,0.00)
chr8-31	chr8	41786001	41786301		0(CAGGTG,+,0.00)
chr9-61	chr9	65544841	65545141		-104(CAGGTG,+,0.00),-78(CAGGTG,+,0.00),-52(CAGGTG,+,0.00),-26(CAGGTG,+,0.00),0(CAGGTG,+,0.00),26(CAGGTG,+,0.00),78(CAGGTG,+,0.00)
chr6-18	chr6	88981654	88981954	-29(CAGCTG,+,0.00),0(CAGCTG,+,0.00),55(CAGCTG,+,0.00)
chr13-24	chr13	102393609	102393909		-42(CAGGTG,+,0.00),-23(CAGGTG,+,0.00),0(CAGGTG,+,0.00)	-11(CACCTG,+,0.00)
chr6-26	chr6	39494196	39494496		-132(CAGGTG,+,0.00),-99(CAGGTG,+,0.00),-66(CAGGTG,+,0.00),-33(CAGGTG,+,0.00),0(CAGGTG,+,0.00),33(CAGGTG,+,0.00),66(CAGGTG,+,0.00),132(CAGGTG,+,0.00)
chr15-26	chr15	100965010	100965310		-129(CAGGTG,+,0.00),-63(CAGGTG,+,0.00),-44(CAGGTG,+,0.00),-22(CAGGTG,+,0.00),0(CAGGTG,+,0.00),22(CAGGTG,+,0.00),44(CAGGTG,+,0.00),66(CAGGTG,+,0.00),110(CAGGTG,+,0.00),132(CAGGTG,+,0.00)
chr7-35	chr7	139852162	139852462		-117(CAGGTG,+,0.00),-104(CAGGTG,+,0.00),-91(CAGGTG,+,0.00),-78(CAGGTG,+,0.00),-52(CAGGTG,+,0.00),-39(CAGGTG,+,0.00),-26(CAGGTG,+,0.00),0(CAGGTG,+,0.00),26(CAGGTG,+,0.00),65(CAGGTG,+,0.00),117(CAGGTG,+,0.00),143(CAGGTG,+,0.00)
chr6-29	chr6	118431555	118431855	-39(CAGCTG,+,0.00),-26(CAGCTG,+,0.00),-13(CAGCTG,+,0.00),0(CAGCTG,+,0.00),13(CAGCTG,+,0.00),26(CAGCTG,+,0.00),41(CAGCTG,+,0.00),56(CAGCTG,+,0.00)
chr11-137	chr11	69362029	69362329	-36(CAGCTG,+,0.00),0(CAGCTG,+,0.00),21(CAGCTG,+,0.00)	14(CAGGTG,+,0.00)
chr2-61	chr2	25797566	25797866	0(CAGCTG,+,0.00),16(CAGCTG,+,0.00),32(CAGCTG,+,0.00),48(CAGCTG,+,0.00),64(CAGCTG,+,0.00)		-13(CACCTG,+,0.00)
chr13-22	chr13	107858170	107858470	-68(CAGCTG,+,0.00),-29(CAGCTG,+,0.00),127(CAGCTG,+,0.00)	-78(CAGGTG,+,0.00),-39(CAGGTG,+,0.00),0(CAGGTG,+,0.00),39(CAGGTG,+,0.00),78(CAGGTG,+,0.00),117(CAGGTG,+,0.00)	10(CACCTG,+,0.00),49(CACCTG,+,0.00),88(CACCTG,+,0.00)
chr9-65	chr9	58521332	58521632		-29(CAGGTG,+,0.00),0(CAGGTG,+,0.00)	-107(CACCTG,+,0.00)
chr7-42	chr7	19800303	19800603		-102(CAGGTG,+,0.00),-91(CAGGTG,+,0.00),-68(CAGGTG,+,0.00),-34(CAGGTG,+,0.00),-23(CAGGTG,+,0.00),0(CAGGTG,+,0.00),11(CAGGTG,+,0.00),45(CAGGTG,+,0.00),68(CAGGTG,+,0.00),79(CAGGTG,+,0.00),102(CAGGTG,+,0.00),136(CAGGTG,+,0.00)
chr10-33	chr10	81334387	81334687	-149(CAGCTG,+,0.00),-24(CAGCTG,+,0.00),0(CAGCTG,+,0.00)		-47(CACCTG,+,0.00),26(CACCTG,+,0.00)
chr1-36	chr1	89998722	89999022	-13(CAGCTG,+,0.00),0(CAGCTG,+,0.00),13(CAGCTG,+,0.00),26(CAGCTG,+,0.00)		39(CACCTG,+,0.00)
chr10-34	chr10	123032088	123032388	32(CAGCTG,+,0.00),46(CAGCTG,+,0.00),60(CAGCTG,+,0.00),74(CAGCTG,+,0.00),88(CAGCTG,+,0.00)	0(CAGGTG,+,0.00)
chr17-50	chr17	25759946	25760246	0(CAGCTG,+,0.00)	19(CAGGTG,+,0.00),28(CAGGTG,+,0.00)
chr5-41	chr5	116525608	116525908	28(CAGCTG,+,0.00)	0(CAGGTG,+,0.00)	-33(CACCTG,+,0.00)
chr4-48	chr4	142383292	142383592	132(CAGCTG,+,0.00),143(CAGCTG,+,0.00)	-132(CAGGTG,+,0.00),-115(CAGGTG,+,0.00),-99(CAGGTG,+,0.00),-66(CAGGTG,+,0.00),-50(CAGGTG,+,0.00),-33(CAGGTG,+,0.00),-16(CAGGTG,+,0.00),0(CAGGTG,+,0.00),17(CAGGTG,+,0.00),34(CAGGTG,+,0.00),51(CAGGTG,+,0.00),67(CAGGTG,+,0.00)
chr8-44	chr8	122726909	122727209	-39(CAGCTG,+,0.00)	-28(CAGGTG,+,0.00),-16(CAGGTG,+,0.00),0(CAGGTG,+,0.00),77(CAGGTG,+,0.00)	49(CACCTG,+,0.00)
chr15-29	chr15	101396951	101397251	-26(CAGCTG,+,0.00),0(CAGCTG,+,0.00),26(CAGCTG,+,0.00),52(CAGCTG,+,0.00)	-12(CAGGTG,+,0.00),14(CAGGTG,+,0.00),40(CAGGTG,+,0.00)	-89(CACCTG,+,0.00)
chr2-76	chr2	127939288	127939588		-119(CAGGTG,+,0.00),-82(CAGGTG,+,0.00),-43(CAGGTG,+,0.00),-12(CAGGTG,+,0.00),-6(CAGGTG,+,0.00),0(CAGGTG,+,0.00),6(CAGGTG,+,0.00),12(CAGGTG,+,0.00),18(CAGGTG,+,0.00),24(CAGGTG,+,0.00)
chr9-71	chr9	120507773	120508073	-102(CAGCTG,+,0.00)	-18(CAGGTG,+,0.00),0(CAGGTG,+,0.00),18(CAGGTG,+,0.00),36(CAGGTG,+,0.00),54(CAGGTG,+,0.00),72(CAGGTG,+,0.00)
chr7-55	chr7	126069796	126070096	-48(CAGCTG,+,0.00)	-22(CAGGTG,+,0.00),-11(CAGGTG,+,0.00),0(CAGGTG,+,0.00),11(CAGGTG,+,0.00),22(CAGGTG,+,0.00)
chr18-25	chr18	74869172	74869472	-65(CAGCTG,+,0.00)	-21(CAGGTG,+,0.00),0(CAGGTG,+,0.00),63(CAGGTG,+,0.00),84(CAGGTG,+,0.00),105(CAGGTG,+,0.00),126(CAGGTG,+,0.00)
chr17-53	chr17	66546463	66546763		-147(CAGGTG,+,0.00),-140(CAGGTG,+,0.00),-126(CAGGTG,+,0.00),-119(CAGGTG,+,0.00),-105(CAGGTG,+,0.00),-84(CAGGTG,+,0.00),-63(CAGGTG,+,0.00),-56(CAGGTG,+,0.00),-42(CAGGTG,+,0.00),-35(CAGGTG,+,0.00),-21(CAGGTG,+,0.00),0(CAGGTG,+,0.00),42(CAGGTG,+,0.00),63(CAGGTG,+,0.00),70(CAGGTG,+,0.00),84(CAGGTG,+,0.00),105(CAGGTG,+,0.00),126(CAGGTG,+,0.00),133(CAGGTG,+,0.00)
chr11-147	chr11	60722725	60723025		-100(CAGGTG,+,0.00),-81(CAGGTG,+,0.00),-62(CAGGTG,+,0.00),-50(CAGGTG,+,0.00),-31(CAGGTG,+,0.00),-19(CAGGTG,+,0.00),0(CAGGTG,+,0.00),12(CAGGTG,+,0.00),31(CAGGTG,+,0.00),43(CAGGTG,+,0.00),62(CAGGTG,+,0.00),81(CAGGTG,+,0.00)
chr19-20	chr19	58691334	58691634	-111(CAGCTG,+,0.00)	-70(CAGGTG,+,0.00),-54(CAGGTG,+,0.00),-16(CAGGTG,+,0.00),0(CAGGTG,+,0.00),38(CAGGTG,+,0.00),54(CAGGTG,+,0.00),92(CAGGTG,+,0.00),108(CAGGTG,+,0.00)
chr4-56	chr4	151922088	151922388	-143(CAGCTG,+,0.00),-128(CAGCTG,+,0.00),-111(CAGCTG,+,0.00),-96(CAGCTG,+,0.00),-79(CAGCTG,+,0.00),-47(CAGCTG,+,0.00),0(CAGCTG,+,0.00),17(CAGCTG,+,0.00),32(CAGCTG,+,0.00),43(CAGCTG,+,0.00),58(CAGCTG,+,0.00),75(CAGCTG,+,0.00),90(CAGCTG,+,0.00)
chr3-31	chr3	96015700	96016000		-31(CAGGTG,+,0.00),-24(CAGGTG,+,0.00),-10(CAGGTG,+,0.00),0(CAGGTG,+,0.00),14(CAGGTG,+,0.00)
chr11-143	chr11	99846727	99847027	0(CAGCTG,+,0.00),14(CAGCTG,+,0.00),29(CAGCTG,+,0.00),42(CAGCTG,+,0.00),57(CAGCTG,+,0.00),72(CAGCTG,+,0.00),87(CAGCTG,+,0.00),102(CAGCTG,+,0.00),132(CAGCTG,+,0.00)	-60(CAGGTG,+,0.00)
chr1-44	chr1	161097024	161097324		-66(CAGGTG,+,0.00),-33(CAGGTG,+,0.00),0(CAGGTG,+,0.00),33(CAGGTG,+,0.00),66(CAGGTG,+,0.00),99(CAGGTG,+,0.00),132(CAGGTG,+,0.00)	-45(CACCTG,+,0.00),21(CACCTG,+,0.00),54(CACCTG,+,0.00),87(CACCTG,+,0.00),120(CACCTG,+,0.00)
chr10-40	chr10	77814681	77814981	-45(CAGCTG,+,0.00),-30(CAGCTG,+,0.00),-15(CAGCTG,+,0.00),0(CAGCTG,+,0.00),15(CAGCTG,+,0.00),30(CAGCTG,+,0.00)	-95(CAGGTG,+,0.00)
chr7-46	chr7	132431405	132431705	-145(CAGCTG,+,0.00),-116(CAGCTG,+,0.00),-87(CAGCTG,+,0.00),-58(CAGCTG,+,0.00),-29(CAGCTG,+,0.00),0(CAGCTG,+,0.00),58(CAGCTG,+,0.00),87(CAGCTG,+,0.00),116(CAGCTG,+,0.00),145(CAGCTG,+,0.00)
chr16-29	chr16	97488306	97488606	-58(CAGCTG,+,0.00),0(CAGCTG,+,0.00),31(CAGCTG,+,0.00)	50(CAGGTG,+,0.00)
chr1-38	chr1	154759399	154759699		-144(CAGGTG,+,0.00),-128(CAGGTG,+,0.00),-112(CAGGTG,+,0.00),-96(CAGGTG,+,0.00),-80(CAGGTG,+,0.00),-64(CAGGTG,+,0.00),-48(CAGGTG,+,0.00),-32(CAGGTG,+,0.00),-16(CAGGTG,+,0.00),0(CAGGTG,+,0.00),16(CAGGTG,+,0.00)
chr16-25	chr16	16825007	16825307	41(CAGCTG,+,0.00)	-91(CAGGTG,+,0.00),-78(CAGGTG,+,0.00),-65(CAGGTG,+,0.00),-52(CAGGTG,+,0.00),-39(CAGGTG,+,0.00),-26(CAGGTG,+,0.00),-13(CAGGTG,+,0.00),0(CAGGTG,+,0.00)
chr17-61	chr17	87272539	87272839		-73(CAGGTG,+,0.00),-59(CAGGTG,+,0.00),-44(CAGGTG,+,0.00),0(CAGGTG,+,0.00),29(CAGGTG,+,0.00),71(CAGGTG,+,0.00)
chr15-36	chr15	98886705	98887005	-34(CAGCTG,+,0.00),-19(CAGCTG,+,0.00),0(CAGCTG,+,0.00),9(CAGCTG,+,0.00)
chr18-26	chr18	82952934	82953234		-73(CAGGTG,+,0.00),-55(CAGGTG,+,0.00),-36(CAGGTG,+,0.00),-12(CAGGTG,+,0.00),0(CAGGTG,+,0.00),13(CAGGTG,+,0.00),25(CAGGTG,+,0.00),38(CAGGTG,+,0.00),64(CAGGTG,+,0.00),76(CAGGTG,+,0.00),89(CAGGTG,+,0.00),101(CAGGTG,+,0.00),114(CAGGTG,+,0.00),127(CAGGTG,+,0.00),140(CAGGTG,+,0.00)	-132(CACCTG,+,0.00)
chr9-83	chr9	119709929	119710229		-114(CAGGTG,+,0.00),-95(CAGGTG,+,0.00),-76(CAGGTG,+,0.00),-57(CAGGTG,+,0.00),-38(CAGGTG,+,0.00),-19(CAGGTG,+,0.00),0(CAGGTG,+,0.00),19(CAGGTG,+,0.00),38(CAGGTG,+,0.00)	54(CACCTG,+,0.00)
chr16-27	chr16	22216274	22216574		-73(CAGGTG,+,0.00),-23(CAGGTG,+,0.00),0(CAGGTG,+,0.00),23(CAGGTG,+,0.00),69(CAGGTG,+,0.00)
chr15-33	chr15	34877039	34877339		-42(CAGGTG,+,0.00),-28(CAGGTG,+,0.00),-14(CAGGTG,+,0.00),0(CAGGTG,+,0.00),14(CAGGTG,+,0.00),28(CAGGTG,+,0.00),42(CAGGTG,+,0.00)
chr13-34	chr13	52062649	52062949	126(CAGCTG,+,0.00)	-38(CAGGTG,+,0.00),-31(CAGGTG,+,0.00),-19(CAGGTG,+,0.00),0(CAGGTG,+,0.00),7(CAGGTG,+,0.00)
chr2-78	chr2	107061522	107061822		-34(CAGGTG,+,0.00),-17(CAGGTG,+,0.00),0(CAGGTG,+,0.00),17(CAGGTG,+,0.00),34(CAGGTG,+,0.00),52(CAGGTG,+,0.00),69(CAGGTG,+,0.00),86(CAGGTG,+,0.00),104(CAGGTG,+,0.00),138(CAGGTG,+,0.00)
chr2-80	chr2	130780671	130780971	-13(CAGCTG,+,0.00),12(CAGCTG,+,0.00),37(CAGCTG,+,0.00)	-25(CAGGTG,+,0.00),0(CAGGTG,+,0.00),25(CAGGTG,+,0.00)
chr11-165	chr11	99627917	99628217	-135(CAGCTG,+,0.00),-30(CAGCTG,+,0.00),-15(CAGCTG,+,0.00),0(CAGCTG,+,0.00),45(CAGCTG,+,0.00)	-105(CAGGTG,+,0.00),15(CAGGTG,+,0.00),30(CAGGTG,+,0.00)
chr4-58	chr4	59610464	59610764	-72(CAGCTG,+,0.00),-36(CAGCTG,+,0.00),-18(CAGCTG,+,0.00),0(CAGCTG,+,0.00),18(CAGCTG,+,0.00),36(CAGCTG,+,0.00),54(CAGCTG,+,0.00),90(CAGCTG,+,0.00)
chr15-40	chr15	99890827	99891127	0(CAGCTG,+,0.00)	94(CAGGTG,+,0.00)	-29(CACCTG,+,0.00)
chr1-65	chr1	131178802	131179102	-114(CAGCTG,+,0.00),-76(CAGCTG,+,0.00),-38(CAGCTG,+,0.00),-32(CAGCTG,+,0.00),0(CAGCTG,+,0.00),44(CAGCTG,+,0.00)	-126(CAGGTG,+,0.00),-88(CAGGTG,+,0.00),-50(CAGGTG,+,0.00),26(CAGGTG,+,0.00),64(CAGGTG,+,0.00)
chr6-42	chr6	24427271	24427571	-44(CAGCTG,+,0.00),-33(CAGCTG,+,0.00),-23(CAGCTG,+,0.00),19(CAGCTG,+,0.00),45(CAGCTG,+,0.00)	0(CAGGTG,+,0.00)
chr5-57	chr5	134715121	134715421	0(CAGCTG,+,0.00)		-27(CACCTG,+,0.00),12(CACCTG,+,0.00),24(CACCTG,+,0.00),36(CACCTG,+,0.00),75(CACCTG,+,0.00)
chr7-65	chr7	139851603	139851903		0(CAGGTG,+,0.00),13(CAGGTG,+,0.00),26(CAGGTG,+,0.00),39(CAGGTG,+,0.00),91(CAGGTG,+,0.00),143(CAGGTG,+,0.00)
chr2-96	chr2	163716963	163717263	-13(CAGCTG,+,0.00),0(CAGCTG,+,0.00),28(CAGCTG,+,0.00)
chr15-43	chr15	36796881	36797181	-23(CAGCTG,+,0.00),0(CAGCTG,+,0.00),30(CAGCTG,+,0.00)		-55(CACCTG,+,0.00),-42(CACCTG,+,0.00),145(CACCTG,+,0.00)
chr17-66	chr17	29627021	29627321	-42(CAGCTG,+,0.00),0(CAGCTG,+,0.00)
chr5-55	chr5	36950395	36950695		-36(CAGGTG,+,0.00),-24(CAGGTG,+,0.00),-12(CAGGTG,+,0.00),0(CAGGTG,+,0.00),12(CAGGTG,+,0.00),24(CAGGTG,+,0.00),40(CAGGTG,+,0.00),67(CAGGTG,+,0.00)
chr11-172	chr11	61081595	61081895		-50(CAGGTG,+,0.00),-34(CAGGTG,+,0.00),-17(CAGGTG,+,0.00),0(CAGGTG,+,0.00),17(CAGGTG,+,0.00),34(CAGGTG,+,0.00),51(CAGGTG,+,0.00),68(CAGGTG,+,0.00),85(CAGGTG,+,0.00)	-79(CACCTG,+,0.00)
chr1-57	chr1	89487763	89488063	-85(CAGCTG,+,0.00)	0(CAGGTG,+,0.00),36(CAGGTG,+,0.00)
chr10-47	chr10	41099762	41100062		-46(CAGGTG,+,0.00),-35(CAGGTG,+,0.00),0(CAGGTG,+,0.00),12(CAGGTG,+,0.00),24(CAGGTG,+,0.00),36(CAGGTG,+,0.00),48(CAGGTG,+,0.00),60(CAGGTG,+,0.00),72(CAGGTG,+,0.00)
chr7-73	chr7	142212034	142212334	-114(CAGCTG,+,0.00),-84(CAGCTG,+,0.00),-30(CAGCTG,+,0.00),0(CAGCTG,+,0.00),15(CAGCTG,+,0.00)
chr7-81	chr7	80963625	80963925	-17(CAGCTG,+,0.00),0(CAGCTG,+,0.00),12(CAGCTG,+,0.00)
chr2-82	chr2	32422185	32422485	0(CAGCTG,+,0.00),15(CAGCTG,+,0.00),27(CAGCTG,+,0.00)
chr12-32	chr12	27724673	27724973	11(CAGCTG,+,0.00)	0(CAGGTG,+,0.00)
chr10-55	chr10	95270936	95271236		-93(CAGGTG,+,0.00),-76(CAGGTG,+,0.00),-62(CAGGTG,+,0.00),-31(CAGGTG,+,0.00),-14(CAGGTG,+,0.00),0(CAGGTG,+,0.00),17(CAGGTG,+,0.00),31(CAGGTG,+,0.00),48(CAGGTG,+,0.00)
chrX-9	chrX	103763182	103763482	24(CAGCTG,+,0.00)	0(CAGGTG,+,0.00),48(CAGGTG,+,0.00)	103(CACCTG,+,0.00),139(CACCTG,+,0.00)
chr7-80	chr7	66350459	66350759		-114(CAGGTG,+,0.00),-95(CAGGTG,+,0.00),-76(CAGGTG,+,0.00),-57(CAGGTG,+,0.00),-38(CAGGTG,+,0.00),-19(CAGGTG,+,0.00),0(CAGGTG,+,0.00),19(CAGGTG,+,0.00),38(CAGGTG,+,0.00),57(CAGGTG,+,0.00)
chr3-42	chr3	52831146	52831446		-115(CAGGTG,+,0.00),-86(CAGGTG,+,0.00),-58(CAGGTG,+,0.00),-29(CAGGTG,+,0.00),0(CAGGTG,+,0.00),29(CAGGTG,+,0.00),58(CAGGTG,+,0.00)	-98(CACCTG,+,0.00),-69(CACCTG,+,0.00),-41(CACCTG,+,0.00),-12(CACCTG,+,0.00),17(CACCTG,+,0.00),46(CACCTG,+,0.00),75(CACCTG,+,0.00)
chr11-187	chr11	101600943	101601243	-145(CAGCTG,+,0.00)	-98(CAGGTG,+,0.00),-62(CAGGTG,+,0.00),-50(CAGGTG,+,0.00),-38(CAGGTG,+,0.00),-26(CAGGTG,+,0.00),-12(CAGGTG,+,0.00),0(CAGGTG,+,0.00),12(CAGGTG,+,0.00),24(CAGGTG,+,0.00),36(CAGGTG,+,0.00)
chr11-173	chr11	62598287	62598587	21(CAGCTG,+,0.00)	0(CAGGTG,+,0.00)	33(CACCTG,+,0.00)
chr4-53	chr4	142523419	142523719		-85(CAGGTG,+,0.00),0(CAGGTG,+,0.00),43(CAGGTG,+,0.00),82(CAGGTG,+,0.00)	-64(CACCTG,+,0.00),-21(CACCTG,+,0.00),21(CACCTG,+,0.00),64(CACCTG,+,0.00)
chr18-34	chr18	81042190	81042490		-41(CAGGTG,+,0.00),-19(CAGGTG,+,0.00),0(CAGGTG,+,0.00),16(CAGGTG,+,0.00),35(CAGGTG,+,0.00),54(CAGGTG,+,0.00),70(CAGGTG,+,0.00),89(CAGGTG,+,0.00),105(CAGGTG,+,0.00)
chr6-59	chr6	127503187	127503487		-110(CAGGTG,+,0.00),-102(CAGGTG,+,0.00),-85(CAGGTG,+,0.00),-68(CAGGTG,+,0.00),-51(CAGGTG,+,0.00),-34(CAGGTG,+,0.00),-17(CAGGTG,+,0.00),0(CAGGTG,+,0.00),17(CAGGTG,+,0.00),34(CAGGTG,+,0.00),51(CAGGTG,+,0.00),85(CAGGTG,+,0.00)
chr18-35	chr18	81956521	81956821		-36(CAGGTG,+,0.00),-13(CAGGTG,+,0.00),0(CAGGTG,+,0.00),17(CAGGTG,+,0.00)	-24(CACCTG,+,0.00),63(CACCTG,+,0.00)
chr2-106	chr2	128911808	128912108	-58(CAGCTG,+,0.00),-29(CAGCTG,+,0.00),0(CAGCTG,+,0.00),29(CAGCTG,+,0.00),58(CAGCTG,+,0.00),87(CAGCTG,+,0.00)	-120(CAGGTG,+,0.00),-87(CAGGTG,+,0.00),116(CAGGTG,+,0.00),145(CAGGTG,+,0.00)
chr11-199	chr11	117474971	117475271		-21(CAGGTG,+,0.00),0(CAGGTG,+,0.00)
chr15-51	chr15	76956697	76956997		-37(CAGGTG,+,0.00),-17(CAGGTG,+,0.00),0(CAGGTG,+,0.00),20(CAGGTG,+,0.00),37(CAGGTG,+,0.00),57(CAGGTG,+,0.00),74(CAGGTG,+,0.00),94(CAGGTG,+,0.00)
chr8-63	chr8	123523893	123524193		-96(CAGGTG,+,0.00),-64(CAGGTG,+,0.00),-32(CAGGTG,+,0.00),0(CAGGTG,+,0.00)	56(CACCTG,+,0.00)
chr9-97	chr9	106646666	106646966		-97(CAGGTG,+,0.00),-72(CAGGTG,+,0.00),-47(CAGGTG,+,0.00),-24(CAGGTG,+,0.00),0(CAGGTG,+,0.00),23(CAGGTG,+,0.00)
chr8-61	chr8	107447780	107448080	-11(CAGCTG,+,0.00)	0(CAGGTG,+,0.00)
chr15-53	chr15	98743767	98744067	-116(CAGCTG,+,0.00),-87(CAGCTG,+,0.00),-58(CAGCTG,+,0.00),-29(CAGCTG,+,0.00),0(CAGCTG,+,0.00),39(CAGCTG,+,0.00),68(CAGCTG,+,0.00),97(CAGCTG,+,0.00),126(CAGCTG,+,0.00)
chr19-30	chr19	46373729	46374029	-72(CAGCTG,+,0.00),-63(CAGCTG,+,0.00),-45(CAGCTG,+,0.00),-36(CAGCTG,+,0.00),-18(CAGCTG,+,0.00),0(CAGCTG,+,0.00),18(CAGCTG,+,0.00)
chr2-114	chr2	135887891	135888191		-12(CAGGTG,+,0.00),0(CAGGTG,+,0.00),12(CAGGTG,+,0.00),24(CAGGTG,+,0.00),36(CAGGTG,+,0.00),48(CAGGTG,+,0.00),60(CAGGTG,+,0.00),79(CAGGTG,+,0.00)
chr17-90	chr17	37531533	37531833	-102(CAGCTG,+,0.00),-30(CAGCTG,+,0.00),-21(CAGCTG,+,0.00),0(CAGCTG,+,0.00),9(CAGCTG,+,0.00)
chr10-70	chr10	58924872	58925172	-144(CAGCTG,+,0.00),-128(CAGCTG,+,0.00),-112(CAGCTG,+,0.00),-96(CAGCTG,+,0.00),-80(CAGCTG,+,0.00),-48(CAGCTG,+,0.00),-32(CAGCTG,+,0.00),-16(CAGCTG,+,0.00),0(CAGCTG,+,0.00),16(CAGCTG,+,0.00),48(CAGCTG,+,0.00),64(CAGCTG,+,0.00),80(CAGCTG,+,0.00),96(CAGCTG,+,0.00),144(CAGCTG,+,0.00)
chr1-96	chr1	89628332	89628632		-95(CAGGTG,+,0.00),-76(CAGGTG,+,0.00),-57(CAGGTG,+,0.00),-38(CAGGTG,+,0.00),-19(CAGGTG,+,0.00),0(CAGGTG,+,0.00),19(CAGGTG,+,0.00),38(CAGGTG,+,0.00),57(CAGGTG,+,0.00),95(CAGGTG,+,0.00)
chr15-49	chr15	58063365	58063665	-86(CAGCTG,+,0.00)	-114(CAGGTG,+,0.00),-76(CAGGTG,+,0.00),-48(CAGGTG,+,0.00),-38(CAGGTG,+,0.00),-10(CAGGTG,+,0.00),0(CAGGTG,+,0.00),38(CAGGTG,+,0.00),76(CAGGTG,+,0.00)
chr3-53	chr3	103460991	103461291		-66(CAGGTG,+,0.00),-60(CAGGTG,+,0.00),-54(CAGGTG,+,0.00),-48(CAGGTG,+,0.00),-42(CAGGTG,+,0.00),-36(CAGGTG,+,0.00),-30(CAGGTG,+,0.00),-24(CAGGTG,+,0.00),-18(CAGGTG,+,0.00),-12(CAGGTG,+,0.00),-6(CAGGTG,+,0.00),0(CAGGTG,+,0.00),6(CAGGTG,+,0.00),12(CAGGTG,+,0.00)
chr15-57	chr15	83673058	83673358		-36(CAGGTG,+,0.00),-24(CAGGTG,+,0.00),-12(CAGGTG,+,0.00),0(CAGGTG,+,0.00),12(CAGGTG,+,0.00),24(CAGGTG,+,0.00),36(CAGGTG,+,0.00),48(CAGGTG,+,0.00),60(CAGGTG,+,0.00),72(CAGGTG,+,0.00),84(CAGGTG,+,0.00)
chr7-107	chr7	67854659	67854959	0(CAGCTG,+,0.00)	18(CAGGTG,+,0.00),39(CAGGTG,+,0.00)
chr13-55	chr13	59096660	59096960		-150(CAGGTG,+,0.00),-135(CAGGTG,+,0.00),-105(CAGGTG,+,0.00),-90(CAGGTG,+,0.00),-75(CAGGTG,+,0.00),-45(CAGGTG,+,0.00),-15(CAGGTG,+,0.00),0(CAGGTG,+,0.00),30(CAGGTG,+,0.00),45(CAGGTG,+,0.00),60(CAGGTG,+,0.00),75(CAGGTG,+,0.00),90(CAGGTG,+,0.00),105(CAGGTG,+,0.00),135(CAGGTG,+,0.00)
chr11-220	chr11	116457310	116457610		-150(CAGGTG,+,0.00),-120(CAGGTG,+,0.00),-90(CAGGTG,+,0.00),-60(CAGGTG,+,0.00),-30(CAGGTG,+,0.00),0(CAGGTG,+,0.00),30(CAGGTG,+,0.00),90(CAGGTG,+,0.00)
chr11-217	chr11	99873582	99873882	-60(CAGCTG,+,0.00),-30(CAGCTG,+,0.00),0(CAGCTG,+,0.00),15(CAGCTG,+,0.00),42(CAGCTG,+,0.00),87(CAGCTG,+,0.00)	126(CAGGTG,+,0.00)	-45(CACCTG,+,0.00)
chr7-113	chr7	139764112	139764412	-92(CAGCTG,+,0.00),-18(CAGCTG,+,0.00)	-148(CAGGTG,+,0.00),-106(CAGGTG,+,0.00),-74(CAGGTG,+,0.00),-49(CAGGTG,+,0.00),-32(CAGGTG,+,0.00),0(CAGGTG,+,0.00),50(CAGGTG,+,0.00),126(CAGGTG,+,0.00)
chr3-50	chr3	76121665	76121965	-81(CAGCTG,+,0.00),-43(CAGCTG,+,0.00),0(CAGCTG,+,0.00)		-11(CACCTG,+,0.00)
chr9-112	chr9	65772357	65772657		-27(CAGGTG,+,0.00),-12(CAGGTG,+,0.00),0(CAGGTG,+,0.00)
chr11-216	chr11	99798321	99798621	-60(CAGCTG,+,0.00),-30(CAGCTG,+,0.00),45(CAGCTG,+,0.00),60(CAGCTG,+,0.00),75(CAGCTG,+,0.00),105(CAGCTG,+,0.00)	-90(CAGGTG,+,0.00),0(CAGGTG,+,0.00)
chr15-61	chr15	79758839	79759139		-70(CAGGTG,+,0.00),-58(CAGGTG,+,0.00),-52(CAGGTG,+,0.00),-40(CAGGTG,+,0.00),-34(CAGGTG,+,0.00),-22(CAGGTG,+,0.00),-16(CAGGTG,+,0.00),0(CAGGTG,+,0.00),6(CAGGTG,+,0.00),23(CAGGTG,+,0.00),35(CAGGTG,+,0.00),85(CAGGTG,+,0.00)
chr2-130	chr2	28202316	28202616		-106(CAGGTG,+,0.00),-81(CAGGTG,+,0.00),-40(CAGGTG,+,0.00),-26(CAGGTG,+,0.00),-20(CAGGTG,+,0.00),-6(CAGGTG,+,0.00),0(CAGGTG,+,0.00),14(CAGGTG,+,0.00),20(CAGGTG,+,0.00),34(CAGGTG,+,0.00),40(CAGGTG,+,0.00),54(CAGGTG,+,0.00),60(CAGGTG,+,0.00),74(CAGGTG,+,0.00),80(CAGGTG,+,0.00),94(CAGGTG,+,0.00),114(CAGGTG,+,0.00),120(CAGGTG,+,0.00),134(CAGGTG,+,0.00),140(CAGGTG,+,0.00)
chr5-95	chr5	123315287	123315587	0(CAGCTG,+,0.00)		7(CACCTG,+,0.00)
chr11-202	chr11	51176147	51176447		-144(CAGGTG,+,0.00),-132(CAGGTG,+,0.00),-120(CAGGTG,+,0.00),-108(CAGGTG,+,0.00),-84(CAGGTG,+,0.00),-36(CAGGTG,+,0.00),0(CAGGTG,+,0.00),9(CAGGTG,+,0.00),81(CAGGTG,+,0.00),144(CAGGTG,+,0.00)
chr8-80	chr8	119851752	119852052		0(CAGGTG,+,0.00),47(CAGGTG,+,0.00),63(CAGGTG,+,0.00),79(CAGGTG,+,0.00),110(CAGGTG,+,0.00)	-119(CACCTG,+,0.00),-16(CACCTG,+,0.00),16(CACCTG,+,0.00),95(CACCTG,+,0.00),126(CACCTG,+,0.00)
chr2-131	chr2	30556560	30556860		0(CAGGTG,+,0.00)	-20(CACCTG,+,0.00)
chr11-203	chr11	55264379	55264679		-56(CAGGTG,+,0.00),-47(CAGGTG,+,0.00),-34(CAGGTG,+,0.00),-25(CAGGTG,+,0.00),0(CAGGTG,+,0.00),9(CAGGTG,+,0.00),18(CAGGTG,+,0.00),27(CAGGTG,+,0.00),49(CAGGTG,+,0.00),58(CAGGTG,+,0.00),67(CAGGTG,+,0.00)
chr7-115	chr7	142257704	142258004	-147(CAGCTG,+,0.00),-114(CAGCTG,+,0.00),-66(CAGCTG,+,0.00),-30(CAGCTG,+,0.00),0(CAGCTG,+,0.00),84(CAGCTG,+,0.00),114(CAGCTG,+,0.00)
chr17-94	chr17	11107123	11107423	-127(CAGCTG,+,0.00)	-63(CAGGTG,+,0.00),-42(CAGGTG,+,0.00),-21(CAGGTG,+,0.00),0(CAGGTG,+,0.00),21(CAGGTG,+,0.00),42(CAGGTG,+,0.00),63(CAGGTG,+,0.00)
chr5-112	chr5	124505103	124505403	-12(CAGCTG,+,0.00),0(CAGCTG,+,0.00)	-140(CAGGTG,+,0.00),40(CAGGTG,+,0.00)	10(CACCTG,+,0.00)
chr11-237	chr11	118348463	118348763	0(CAGCTG,+,0.00)	-44(CAGGTG,+,0.00),17(CAGGTG,+,0.00)
chr1-75	chr1	125389980	125390280	-112(CAGCTG,+,0.00),-86(CAGCTG,+,0.00),-60(CAGCTG,+,0.00),-30(CAGCTG,+,0.00),0(CAGCTG,+,0.00),30(CAGCTG,+,0.00),60(CAGCTG,+,0.00),90(CAGCTG,+,0.00)
chr11-228	chr11	49588955	49589255		-120(CAGGTG,+,0.00),-108(CAGGTG,+,0.00),-96(CAGGTG,+,0.00),-84(CAGGTG,+,0.00),-72(CAGGTG,+,0.00),-48(CAGGTG,+,0.00),0(CAGGTG,+,0.00),36(CAGGTG,+,0.00),48(CAGGTG,+,0.00),108(CAGGTG,+,0.00)	60(CACCTG,+,0.00)
chr2-126	chr2	155961885	155962185	-18(CAGCTG,+,0.00)	0(CAGGTG,+,0.00)
chr9-127	chr9	105969229	105969529		-18(CAGGTG,+,0.00),-9(CAGGTG,+,0.00),0(CAGGTG,+,0.00),9(CAGGTG,+,0.00),18(CAGGTG,+,0.00)
chr17-99	chr17	46508365	46508665	-66(CAGCTG,+,0.00),75(CAGCTG,+,0.00)	0(CAGGTG,+,0.00)
chr4-102	chr4	117827133	117827433		-146(CAGGTG,+,0.00),-123(CAGGTG,+,0.00),-115(CAGGTG,+,0.00),-100(CAGGTG,+,0.00),-92(CAGGTG,+,0.00),-77(CAGGTG,+,0.00),-69(CAGGTG,+,0.00),-54(CAGGTG,+,0.00),-46(CAGGTG,+,0.00),-31(CAGGTG,+,0.00),-23(CAGGTG,+,0.00),0(CAGGTG,+,0.00),15(CAGGTG,+,0.00),23(CAGGTG,+,0.00),61(CAGGTG,+,0.00)
chr5-97	chr5	132712804	132713104		-44(CAGGTG,+,0.00),-31(CAGGTG,+,0.00),-18(CAGGTG,+,0.00),0(CAGGTG,+,0.00),13(CAGGTG,+,0.00),26(CAGGTG,+,0.00),39(CAGGTG,+,0.00),57(CAGGTG,+,0.00),70(CAGGTG,+,0.00),83(CAGGTG,+,0.00),96(CAGGTG,+,0.00),113(CAGGTG,+,0.00),131(CAGGTG,+,0.00)
chr10-69	chr10	44114505	44114805	0(CAGCTG,+,0.00),39(CAGCTG,+,0.00)	-74(CAGGTG,+,0.00)
chr11-253	chr11	114650638	114650938	-138(CAGCTG,+,0.00),-92(CAGCTG,+,0.00),-46(CAGCTG,+,0.00),0(CAGCTG,+,0.00)	-126(CAGGTG,+,0.00),-80(CAGGTG,+,0.00),-34(CAGGTG,+,0.00),12(CAGGTG,+,0.00)
chr7-120	chr7	38073081	38073381		-17(CAGGTG,+,0.00),0(CAGGTG,+,0.00),44(CAGGTG,+,0.00)
chr1-100	chr1	187171464	187171764	-140(CAGCTG,+,0.00),-120(CAGCTG,+,0.00),-100(CAGCTG,+,0.00),-80(CAGCTG,+,0.00),-60(CAGCTG,+,0.00),-40(CAGCTG,+,0.00),-20(CAGCTG,+,0.00),0(CAGCTG,+,0.00),20(CAGCTG,+,0.00),40(CAGCTG,+,0.00),60(CAGCTG,+,0.00),80(CAGCTG,+,0.00),100(CAGCTG,+,0.00),120(CAGCTG,+,0.00)
chr10-79	chr10	43992137	43992437	-140(CAGCTG,+,0.00),-105(CAGCTG,+,0.00),-70(CAGCTG,+,0.00),-35(CAGCTG,+,0.00),0(CAGCTG,+,0.00),35(CAGCTG,+,0.00),70(CAGCTG,+,0.00),105(CAGCTG,+,0.00)	-118(CAGGTG,+,0.00),-48(CAGGTG,+,0.00),22(CAGGTG,+,0.00),92(CAGGTG,+,0.00),127(CAGGTG,+,0.00)
chr8-90	chr8	110488369	110488669	0(CAGCTG,+,0.00),29(CAGCTG,+,0.00)	12(CAGGTG,+,0.00)
chr4-148	chr4	152497047	152497347	-40(CAGCTG,+,0.00),11(CAGCTG,+,0.00),91(CAGCTG,+,0.00),110(CAGCTG,+,0.00)	-68(CAGGTG,+,0.00),-18(CAGGTG,+,0.00),0(CAGGTG,+,0.00),62(CAGGTG,+,0.00),80(CAGGTG,+,0.00)
chr11-234	chr11	116499914	116500214		-120(CAGGTG,+,0.00),-100(CAGGTG,+,0.00),-80(CAGGTG,+,0.00),-60(CAGGTG,+,0.00),-40(CAGGTG,+,0.00),-20(CAGGTG,+,0.00),0(CAGGTG,+,0.00),20(CAGGTG,+,0.00),40(CAGGTG,+,0.00)
chr9-117	chr9	120394350	120394650		-132(CAGGTG,+,0.00),-88(CAGGTG,+,0.00),-66(CAGGTG,+,0.00),-44(CAGGTG,+,0.00),-22(CAGGTG,+,0.00),0(CAGGTG,+,0.00),22(CAGGTG,+,0.00),44(CAGGTG,+,0.00),66(CAGGTG,+,0.00),88(CAGGTG,+,0.00),110(CAGGTG,+,0.00)
chr5-116	chr5	21617700	21618000		-133(CAGGTG,+,0.00),-57(CAGGTG,+,0.00),-47(CAGGTG,+,0.00),-9(CAGGTG,+,0.00),0(CAGGTG,+,0.00),19(CAGGTG,+,0.00),38(CAGGTG,+,0.00),48(CAGGTG,+,0.00),86(CAGGTG,+,0.00)
chr8-83	chr8	23934678	23934978		-114(CAGGTG,+,0.00),-76(CAGGTG,+,0.00),-38(CAGGTG,+,0.00),0(CAGGTG,+,0.00),38(CAGGTG,+,0.00),76(CAGGTG,+,0.00),114(CAGGTG,+,0.00)
chr18-38	chr18	67348101	67348401		-69(CAGGTG,+,0.00),0(CAGGTG,+,0.00),46(CAGGTG,+,0.00)	-75(CACCTG,+,0.00),-58(CACCTG,+,0.00),-12(CACCTG,+,0.00),23(CACCTG,+,0.00),34(CACCTG,+,0.00),80(CACCTG,+,0.00),115(CACCTG,+,0.00),126(CACCTG,+,0.00)
chr15-82	chr15	94724663	94724963		-106(CAGGTG,+,0.00),-100(CAGGTG,+,0.00),-94(CAGGTG,+,0.00),-47(CAGGTG,+,0.00),-41(CAGGTG,+,0.00),-35(CAGGTG,+,0.00),0(CAGGTG,+,0.00),35(CAGGTG,+,0.00),47(CAGGTG,+,0.00),89(CAGGTG,+,0.00),107(CAGGTG,+,0.00),125(CAGGTG,+,0.00)
chr5-118	chr5	30728898	30729198	-33(CAGCTG,+,0.00),0(CAGCTG,+,0.00),33(CAGCTG,+,0.00),66(CAGCTG,+,0.00)	-13(CAGGTG,+,0.00),20(CAGGTG,+,0.00),53(CAGGTG,+,0.00),94(CAGGTG,+,0.00),134(CAGGTG,+,0.00)	-72(CACCTG,+,0.00)
chr6-78	chr6	119511982	119512282		-79(CAGGTG,+,0.00),-58(CAGGTG,+,0.00),-39(CAGGTG,+,0.00),-19(CAGGTG,+,0.00),0(CAGGTG,+,0.00),20(CAGGTG,+,0.00),39(CAGGTG,+,0.00),58(CAGGTG,+,0.00),78(CAGGTG,+,0.00),97(CAGGTG,+,0.00),116(CAGGTG,+,0.00),143(CAGGTG,+,0.00)
chr9-145	chr9	96259708	96260008	0(CAGCTG,+,0.00)
chr2-135	chr2	91309553	91309853	-78(CAGCTG,+,0.00),0(CAGCTG,+,0.00),130(CAGCTG,+,0.00)	-11(CAGGTG,+,0.00),47(CAGGTG,+,0.00),86(CAGGTG,+,0.00)
chr7-125	chr7	46071095	46071395		-148(CAGGTG,+,0.00),-124(CAGGTG,+,0.00),-99(CAGGTG,+,0.00),-74(CAGGTG,+,0.00),-49(CAGGTG,+,0.00),-24(CAGGTG,+,0.00),0(CAGGTG,+,0.00),24(CAGGTG,+,0.00),49(CAGGTG,+,0.00),73(CAGGTG,+,0.00)
chr5-107	chr5	53338569	53338869	-95(CAGCTG,+,0.00),-49(CAGCTG,+,0.00)	-40(CAGGTG,+,0.00),-20(CAGGTG,+,0.00),0(CAGGTG,+,0.00),40(CAGGTG,+,0.00),60(CAGGTG,+,0.00)	92(CACCTG,+,0.00)
chr1-110	chr1	86199084	86199384	-52(CAGCTG,+,0.00),0(CAGCTG,+,0.00),9(CAGCTG,+,0.00),20(CAGCTG,+,0.00)		-91(CACCTG,+,0.00),31(CACCTG,+,0.00)
chr18-53	chr18	11892282	11892582	0(CAGCTG,+,0.00),15(CAGCTG,+,0.00),29(CAGCTG,+,0.00),44(CAGCTG,+,0.00),74(CAGCTG,+,0.00),89(CAGCTG,+,0.00),104(CAGCTG,+,0.00),119(CAGCTG,+,0.00),134(CAGCTG,+,0.00)
chr19-46	chr19	21816226	21816526	28(CAGCTG,+,0.00)	-94(CAGGTG,+,0.00),-62(CAGGTG,+,0.00),-48(CAGGTG,+,0.00),-32(CAGGTG,+,0.00),-16(CAGGTG,+,0.00),0(CAGGTG,+,0.00),40(CAGGTG,+,0.00)
chr4-103	chr4	130636734	130637034	-94(CAGCTG,+,0.00),0(CAGCTG,+,0.00)	42(CAGGTG,+,0.00)
chr17-112	chr17	73747662	73747962		-150(CAGGTG,+,0.00),-135(CAGGTG,+,0.00),-120(CAGGTG,+,0.00),-105(CAGGTG,+,0.00),-90(CAGGTG,+,0.00),-75(CAGGTG,+,0.00),-60(CAGGTG,+,0.00),-45(CAGGTG,+,0.00),-30(CAGGTG,+,0.00),-15(CAGGTG,+,0.00),0(CAGGTG,+,0.00)
chr4-150	chr4	153795098	153795398	-146(CAGCTG,+,0.00)	-65(CAGGTG,+,0.00),-52(CAGGTG,+,0.00),-26(CAGGTG,+,0.00),0(CAGGTG,+,0.00),13(CAGGTG,+,0.00),26(CAGGTG,+,0.00),52(CAGGTG,+,0.00),99(CAGGTG,+,0.00)	-137(CACCTG,+,0.00)
chr11-214	chr11	99580757	99581057	-42(CAGCTG,+,0.00),-27(CAGCTG,+,0.00),-12(CAGCTG,+,0.00)	0(CAGGTG,+,0.00)
chr14-53	chr14	46947693	46947993		-31(CAGGTG,+,0.00),-12(CAGGTG,+,0.00),0(CAGGTG,+,0.00),19(CAGGTG,+,0.00),31(CAGGTG,+,0.00),50(CAGGTG,+,0.00)
chr15-96	chr15	84411127	84411427		-114(CAGGTG,+,0.00),-76(CAGGTG,+,0.00),-38(CAGGTG,+,0.00),0(CAGGTG,+,0.00),38(CAGGTG,+,0.00)	-136(CACCTG,+,0.00),-60(CACCTG,+,0.00),-22(CACCTG,+,0.00),16(CACCTG,+,0.00),54(CACCTG,+,0.00)
chr7-151	chr7	135405651	135405951	-90(CAGCTG,+,0.00),-72(CAGCTG,+,0.00),-36(CAGCTG,+,0.00),0(CAGCTG,+,0.00)		-96(CACCTG,+,0.00),-78(CACCTG,+,0.00),-60(CACCTG,+,0.00),-42(CACCTG,+,0.00),-24(CACCTG,+,0.00),12(CACCTG,+,0.00)
chr15-78	chr15	27356642	27356942		-132(CAGGTG,+,0.00),-110(CAGGTG,+,0.00),-99(CAGGTG,+,0.00),-88(CAGGTG,+,0.00),-44(CAGGTG,+,0.00),-33(CAGGTG,+,0.00),-22(CAGGTG,+,0.00),0(CAGGTG,+,0.00),11(CAGGTG,+,0.00),22(CAGGTG,+,0.00),44(CAGGTG,+,0.00)
chr17-103	chr17	66545889	66546189		-133(CAGGTG,+,0.00),-126(CAGGTG,+,0.00),-112(CAGGTG,+,0.00),-91(CAGGTG,+,0.00),-49(CAGGTG,+,0.00),-28(CAGGTG,+,0.00),0(CAGGTG,+,0.00),14(CAGGTG,+,0.00),21(CAGGTG,+,0.00),35(CAGGTG,+,0.00),56(CAGGTG,+,0.00),77(CAGGTG,+,0.00),84(CAGGTG,+,0.00),98(CAGGTG,+,0.00),105(CAGGTG,+,0.00),119(CAGGTG,+,0.00),140(CAGGTG,+,0.00)
chr12-68	chr12	24735035	24735335	36(CAGCTG,+,0.00)	0(CAGGTG,+,0.00)
chr15-86	chr15	37430925	37431225		-30(CAGGTG,+,0.00),0(CAGGTG,+,0.00),30(CAGGTG,+,0.00)	-16(CACCTG,+,0.00),14(CACCTG,+,0.00),44(CACCTG,+,0.00)
chr11-239	chr11	4940285	4940585	-126(CAGCTG,+,0.00),-108(CAGCTG,+,0.00),-90(CAGCTG,+,0.00),-72(CAGCTG,+,0.00),-54(CAGCTG,+,0.00),-18(CAGCTG,+,0.00),0(CAGCTG,+,0.00),18(CAGCTG,+,0.00),72(CAGCTG,+,0.00),90(CAGCTG,+,0.00)	-144(CAGGTG,+,0.00),-36(CAGGTG,+,0.00),36(CAGGTG,+,0.00),54(CAGGTG,+,0.00)
chr2-164	chr2	166721807	166722107	-15(CAGCTG,+,0.00)	0(CAGGTG,+,0.00),83(CAGGTG,+,0.00)	118(CACCTG,+,0.00)
chr5-138	chr5	31316393	31316693		-30(CAGGTG,+,0.00),0(CAGGTG,+,0.00)
chr11-246	chr11	61411267	61411567	0(CAGCTG,+,0.00),32(CAGCTG,+,0.00),105(CAGCTG,+,0.00)		13(CACCTG,+,0.00)
chr10-100	chr10	7133047	7133347	-72(CAGCTG,+,0.00),-48(CAGCTG,+,0.00),-24(CAGCTG,+,0.00),0(CAGCTG,+,0.00)	-105(CAGGTG,+,0.00),-60(CAGGTG,+,0.00),-36(CAGGTG,+,0.00),-12(CAGGTG,+,0.00),12(CAGGTG,+,0.00)
chr9-164	chr9	91456496	91456796	0(CAGCTG,+,0.00)
chr5-129	chr5	139093578	139093878	-25(CAGCTG,+,0.00),-14(CAGCTG,+,0.00),0(CAGCTG,+,0.00),73(CAGCTG,+,0.00)		-119(CACCTG,+,0.00)
chr4-184	chr4	151295604	151295904	0(CAGCTG,+,0.00),32(CAGCTG,+,0.00),93(CAGCTG,+,0.00)	17(CAGGTG,+,0.00)
chr11-248	chr11	85969433	85969733		-33(CAGGTG,+,0.00),0(CAGGTG,+,0.00),33(CAGGTG,+,0.00)	-18(CACCTG,+,0.00),15(CACCTG,+,0.00)
chr6-88	chr6	100075772	100076072	-53(CAGCTG,+,0.00)	-41(CAGGTG,+,0.00),0(CAGGTG,+,0.00)	30(CACCTG,+,0.00)
chr16-62	chr16	90082135	90082435		-139(CAGGTG,+,0.00),-125(CAGGTG,+,0.00),-111(CAGGTG,+,0.00),-97(CAGGTG,+,0.00),-70(CAGGTG,+,0.00),-56(CAGGTG,+,0.00),-42(CAGGTG,+,0.00),-28(CAGGTG,+,0.00),-14(CAGGTG,+,0.00),0(CAGGTG,+,0.00),14(CAGGTG,+,0.00),28(CAGGTG,+,0.00),42(CAGGTG,+,0.00)
chr4-135	chr4	134634239	134634539		0(CAGGTG,+,0.00),12(CAGGTG,+,0.00)
chr8-151	chr8	125271413	125271713	0(CAGCTG,+,0.00)	13(CAGGTG,+,0.00)	-43(CACCTG,+,0.00)
chr3-110	chr3	154131071	154131371		-132(CAGGTG,+,0.00),-99(CAGGTG,+,0.00),-67(CAGGTG,+,0.00),-35(CAGGTG,+,0.00),0(CAGGTG,+,0.00),36(CAGGTG,+,0.00),68(CAGGTG,+,0.00),104(CAGGTG,+,0.00),140(CAGGTG,+,0.00)
chr4-236	chr4	154099417	154099717	-45(CAGCTG,+,0.00),0(CAGCTG,+,0.00)		121(CACCTG,+,0.00)
chr2-212	chr2	129544602	129544902	-72(CAGCTG,+,0.00),-18(CAGCTG,+,0.00),0(CAGCTG,+,0.00),145(CAGCTG,+,0.00)
chr4-169	chr4	133526670	133526970	-61(CAGCTG,+,0.00),-25(CAGCTG,+,0.00),11(CAGCTG,+,0.00),47(CAGCTG,+,0.00),83(CAGCTG,+,0.00)	-72(CAGGTG,+,0.00),-36(CAGGTG,+,0.00),0(CAGGTG,+,0.00),36(CAGGTG,+,0.00),72(CAGGTG,+,0.00)
chr11-267	chr11	52188484	52188784	135(CAGCTG,+,0.00)	-123(CAGGTG,+,0.00),-75(CAGGTG,+,0.00),-12(CAGGTG,+,0.00),0(CAGGTG,+,0.00),111(CAGGTG,+,0.00)
chr10-93	chr10	63157428	63157728	0(CAGCTG,+,0.00)		-53(CACCTG,+,0.00),-14(CACCTG,+,0.00)
chr5-163	chr5	36556990	36557290		0(CAGGTG,+,0.00),48(CAGGTG,+,0.00)
chr4-210	chr4	136801492	136801792	26(CAGCTG,+,0.00),87(CAGCTG,+,0.00)	-39(CAGGTG,+,0.00),0(CAGGTG,+,0.00)
chr7-176	chr7	127231379	127231679	0(CAGCTG,+,0.00)	-94(CAGGTG,+,0.00),-54(CAGGTG,+,0.00)	-42(CACCTG,+,0.00)
chr11-294	chr11	6650564	6650864	0(CAGCTG,+,0.00),6(CAGCTG,+,0.00)	-24(CAGGTG,+,0.00),30(CAGGTG,+,0.00)
chr9-173	chr9	6212948	6213248	-69(CAGCTG,+,0.00),-58(CAGCTG,+,0.00),-50(CAGCTG,+,0.00),-42(CAGCTG,+,0.00),-34(CAGCTG,+,0.00),0(CAGCTG,+,0.00)
chr5-180	chr5	117068787	117069087	-48(CAGCTG,+,0.00),-19(CAGCTG,+,0.00),0(CAGCTG,+,0.00)
chr5-197	chr5	148076789	148077089	-38(CAGCTG,+,0.00),0(CAGCTG,+,0.00),6(CAGCTG,+,0.00),14(CAGCTG,+,0.00),143(CAGCTG,+,0.00)		-135(CACCTG,+,0.00)
chr10-115	chr10	127276317	127276617	0(CAGCTG,+,0.00),21(CAGCTG,+,0.00)	-15(CAGGTG,+,0.00)
chr17-148	chr17	28777811	28778111	113(CAGCTG,+,0.00)	-96(CAGGTG,+,0.00),-80(CAGGTG,+,0.00),-48(CAGGTG,+,0.00),0(CAGGTG,+,0.00),32(CAGGTG,+,0.00),64(CAGGTG,+,0.00)
chr4-188	chr4	11055930	11056230	0(CAGCTG,+,0.00),45(CAGCTG,+,0.00),90(CAGCTG,+,0.00),135(CAGCTG,+,0.00)	14(CAGGTG,+,0.00),59(CAGGTG,+,0.00),104(CAGGTG,+,0.00)
chr2-189	chr2	167109554	167109854	0(CAGCTG,+,0.00),15(CAGCTG,+,0.00)	-23(CAGGTG,+,0.00)
chr7-199	chr7	46267113	46267413	-99(CAGCTG,+,0.00),-23(CAGCTG,+,0.00),69(CAGCTG,+,0.00)	0(CAGGTG,+,0.00)
chr10-113	chr10	111190715	111191015		-112(CAGGTG,+,0.00),-96(CAGGTG,+,0.00),-80(CAGGTG,+,0.00),-64(CAGGTG,+,0.00),-48(CAGGTG,+,0.00),-32(CAGGTG,+,0.00),0(CAGGTG,+,0.00),16(CAGGTG,+,0.00),32(CAGGTG,+,0.00),48(CAGGTG,+,0.00),64(CAGGTG,+,0.00),80(CAGGTG,+,0.00),96(CAGGTG,+,0.00),112(CAGGTG,+,0.00),128(CAGGTG,+,0.00),144(CAGGTG,+,0.00)
chr4-194	chr4	43371785	43372085	-150(CAGCTG,+,0.00),-120(CAGCTG,+,0.00),-90(CAGCTG,+,0.00),-60(CAGCTG,+,0.00),-30(CAGCTG,+,0.00),0(CAGCTG,+,0.00),30(CAGCTG,+,0.00)
chr16-89	chr16	32820598	32820898	0(CAGCTG,+,0.00),17(CAGCTG,+,0.00)
chr19-51	chr19	45065873	45066173		-20(CAGGTG,+,0.00),0(CAGGTG,+,0.00)
chr9-196	chr9	102692575	102692875	0(CAGCTG,+,0.00)	73(CAGGTG,+,0.00)
chr2-197	chr2	32302640	32302940	-21(CAGCTG,+,0.00),103(CAGCTG,+,0.00)	0(CAGGTG,+,0.00),53(CAGGTG,+,0.00),130(CAGGTG,+,0.00)
chr15-91	chr15	77793102	77793402		-96(CAGGTG,+,0.00),-80(CAGGTG,+,0.00),-64(CAGGTG,+,0.00),-48(CAGGTG,+,0.00),-32(CAGGTG,+,0.00),-16(CAGGTG,+,0.00),0(CAGGTG,+,0.00),67(CAGGTG,+,0.00)
chr10-173	chr10	77742259	77742559	-75(CAGCTG,+,0.00),-60(CAGCTG,+,0.00),-30(CAGCTG,+,0.00),0(CAGCTG,+,0.00),15(CAGCTG,+,0.00),45(CAGCTG,+,0.00),75(CAGCTG,+,0.00)
chr17-188	chr17	29365309	29365609	-125(CAGCTG,+,0.00)	-19(CAGGTG,+,0.00),0(CAGGTG,+,0.00)
chr15-160	chr15	96308126	96308426		0(CAGGTG,+,0.00)	114(CACCTG,+,0.00)
chr10-141	chr10	116354416	116354716	0(CAGCTG,+,0.00),30(CAGCTG,+,0.00)
chr5-186	chr5	127978592	127978892		-72(CAGGTG,+,0.00),-60(CAGGTG,+,0.00),-48(CAGGTG,+,0.00),-36(CAGGTG,+,0.00),0(CAGGTG,+,0.00),12(CAGGTG,+,0.00),24(CAGGTG,+,0.00),35(CAGGTG,+,0.00),82(CAGGTG,+,0.00),94(CAGGTG,+,0.00)
chr11-397	chr11	99897511	99897811	-23(CAGCTG,+,0.00),0(CAGCTG,+,0.00)	-53(CAGGTG,+,0.00),27(CAGGTG,+,0.00),42(CAGGTG,+,0.00)
chr8-140	chr8	110357846	110358146	-144(CAGCTG,+,0.00),-124(CAGCTG,+,0.00),-103(CAGCTG,+,0.00),-83(CAGCTG,+,0.00),-62(CAGCTG,+,0.00),-41(CAGCTG,+,0.00),-21(CAGCTG,+,0.00),0(CAGCTG,+,0.00),21(CAGCTG,+,0.00),42(CAGCTG,+,0.00),62(CAGCTG,+,0.00),83(CAGCTG,+,0.00),103(CAGCTG,+,0.00),123(CAGCTG,+,0.00),144(CAGCTG,+,0.00)
chr5-258	chr5	134349259	134349559		0(CAGGTG,+,0.00),18(CAGGTG,+,0.00)	-29(CACCTG,+,0.00)
chr5-175	chr5	111911185	111911485		0(CAGGTG,+,0.00),12(CAGGTG,+,0.00),19(CAGGTG,+,0.00),31(CAGGTG,+,0.00)	-66(CACCTG,+,0.00)
chr11-391	chr11	94578889	94579189		0(CAGGTG,+,0.00)
chr5-189	chr5	134715567	134715867	0(CAGCTG,+,0.00)	35(CAGGTG,+,0.00),83(CAGGTG,+,0.00)	12(CACCTG,+,0.00)
chr11-322	chr11	99772517	99772817	-120(CAGCTG,+,0.00),-75(CAGCTG,+,0.00),-60(CAGCTG,+,0.00),0(CAGCTG,+,0.00),57(CAGCTG,+,0.00),117(CAGCTG,+,0.00),132(CAGCTG,+,0.00)		-105(CACCTG,+,0.00),-90(CACCTG,+,0.00),-15(CACCTG,+,0.00),42(CACCTG,+,0.00)
chr13-141	chr13	18164187	18164487		-110(CAGGTG,+,0.00),-88(CAGGTG,+,0.00),-66(CAGGTG,+,0.00),-44(CAGGTG,+,0.00),-22(CAGGTG,+,0.00),0(CAGGTG,+,0.00)
chr12-114	chr12	108848126	108848426		-52(CAGGTG,+,0.00),0(CAGGTG,+,0.00),52(CAGGTG,+,0.00),104(CAGGTG,+,0.00)	-41(CACCTG,+,0.00),11(CACCTG,+,0.00),63(CACCTG,+,0.00),115(CACCTG,+,0.00)
chr5-154	chr5	146695557	146695857	0(CAGCTG,+,0.00),54(CAGCTG,+,0.00),73(CAGCTG,+,0.00)		-67(CACCTG,+,0.00)
chr4-265	chr4	62511554	62511854		0(CAGGTG,+,0.00)
chr4-146	chr4	151621636	151621936	-134(CAGCTG,+,0.00),-115(CAGCTG,+,0.00),-96(CAGCTG,+,0.00),-77(CAGCTG,+,0.00),-48(CAGCTG,+,0.00),-29(CAGCTG,+,0.00),0(CAGCTG,+,0.00),19(CAGCTG,+,0.00),28(CAGCTG,+,0.00),38(CAGCTG,+,0.00),47(CAGCTG,+,0.00),66(CAGCTG,+,0.00),75(CAGCTG,+,0.00),94(CAGCTG,+,0.00),122(CAGCTG,+,0.00),141(CAGCTG,+,0.00)
chr15-145	chr15	77116318	77116618		-45(CAGGTG,+,0.00),-30(CAGGTG,+,0.00),-15(CAGGTG,+,0.00),0(CAGGTG,+,0.00),15(CAGGTG,+,0.00),30(CAGGTG,+,0.00)
chr9-176	chr9	22019172	22019472		-42(CAGGTG,+,0.00),-21(CAGGTG,+,0.00),0(CAGGTG,+,0.00),21(CAGGTG,+,0.00)
chr5-265	chr5	147297276	147297576	-107(CAGCTG,+,0.00),-12(CAGCTG,+,0.00),0(CAGCTG,+,0.00)	-28(CAGGTG,+,0.00)
chr3-157	chr3	144639423	144639723		0(CAGGTG,+,0.00)
chr15-111	chr15	78231052	78231352		-65(CAGGTG,+,0.00),-39(CAGGTG,+,0.00),-13(CAGGTG,+,0.00),0(CAGGTG,+,0.00),26(CAGGTG,+,0.00),39(CAGGTG,+,0.00),52(CAGGTG,+,0.00),65(CAGGTG,+,0.00)
chr17-199	chr17	31034142	31034442	0(CAGCTG,+,0.00),49(CAGCTG,+,0.00)
chr15-119	chr15	100770411	100770711	-24(CAGCTG,+,0.00),-12(CAGCTG,+,0.00),0(CAGCTG,+,0.00),12(CAGCTG,+,0.00),24(CAGCTG,+,0.00)
chr5-234	chr5	100751676	100751976	0(CAGCTG,+,0.00)	21(CAGGTG,+,0.00)
chr17-143	chr17	15295456	15295756		-93(CAGGTG,+,0.00),-65(CAGGTG,+,0.00),-27(CAGGTG,+,0.00),0(CAGGTG,+,0.00),17(CAGGTG,+,0.00),55(CAGGTG,+,0.00),100(CAGGTG,+,0.00)
chr13-175	chr13	96037378	96037678	-54(CAGCTG,+,0.00),-36(CAGCTG,+,0.00),-18(CAGCTG,+,0.00),0(CAGCTG,+,0.00),18(CAGCTG,+,0.00),36(CAGCTG,+,0.00)	-45(CAGGTG,+,0.00),-27(CAGGTG,+,0.00),-9(CAGGTG,+,0.00),9(CAGGTG,+,0.00),27(CAGGTG,+,0.00)
chr7-272	chr7	142240293	142240593	-144(CAGCTG,+,0.00),-90(CAGCTG,+,0.00),-60(CAGCTG,+,0.00),-30(CAGCTG,+,0.00),0(CAGCTG,+,0.00),30(CAGCTG,+,0.00),60(CAGCTG,+,0.00)
chr14-66	chr14	33217553	33217853		-31(CAGGTG,+,0.00),0(CAGGTG,+,0.00),16(CAGGTG,+,0.00),32(CAGGTG,+,0.00),48(CAGGTG,+,0.00),64(CAGGTG,+,0.00),80(CAGGTG,+,0.00),96(CAGGTG,+,0.00),112(CAGGTG,+,0.00),128(CAGGTG,+,0.00),144(CAGGTG,+,0.00)
chr11-308	chr11	65053139	65053439		-33(CAGGTG,+,0.00),-22(CAGGTG,+,0.00),-11(CAGGTG,+,0.00),0(CAGGTG,+,0.00),11(CAGGTG,+,0.00),22(CAGGTG,+,0.00),33(CAGGTG,+,0.00),44(CAGGTG,+,0.00)	-75(CACCTG,+,0.00)
chr11-376	chr11	70174431	70174731		0(CAGGTG,+,0.00)
chr5-173	chr5	107556970	107557270	-15(CAGCTG,+,0.00)	0(CAGGTG,+,0.00),49(CAGGTG,+,0.00)
chr3-102	chr3	88096274	88096574		-104(CAGGTG,+,0.00),-63(CAGGTG,+,0.00),-52(CAGGTG,+,0.00),-41(CAGGTG,+,0.00),0(CAGGTG,+,0.00),11(CAGGTG,+,0.00),22(CAGGTG,+,0.00),63(CAGGTG,+,0.00),74(CAGGTG,+,0.00),85(CAGGTG,+,0.00),126(CAGGTG,+,0.00)
chr7-182	chr7	142296459	142296759	-54(CAGCTG,+,0.00),0(CAGCTG,+,0.00),30(CAGCTG,+,0.00),60(CAGCTG,+,0.00),114(CAGCTG,+,0.00)
chr2-308	chr2	168950758	168951058	0(CAGCTG,+,0.00)
chr5-198	chr5	148124965	148125265	14(CAGCTG,+,0.00)	0(CAGGTG,+,0.00)
chr10-166	chr10	69817013	69817313		-99(CAGGTG,+,0.00),0(CAGGTG,+,0.00),11(CAGGTG,+,0.00),22(CAGGTG,+,0.00),33(CAGGTG,+,0.00),44(CAGGTG,+,0.00)	55(CACCTG,+,0.00)
chr9-188	chr9	60623539	60623839		0(CAGGTG,+,0.00),19(CAGGTG,+,0.00),38(CAGGTG,+,0.00),57(CAGGTG,+,0.00),76(CAGGTG,+,0.00),95(CAGGTG,+,0.00),114(CAGGTG,+,0.00)
chr10-133	chr10	85421326	85421626	0(CAGCTG,+,0.00),34(CAGCTG,+,0.00)	-25(CAGGTG,+,0.00)
chr17-190	chr17	30484749	30485049	0(CAGCTG,+,0.00)
chr2-231	chr2	179350882	179351182		-144(CAGGTG,+,0.00),-84(CAGGTG,+,0.00),-63(CAGGTG,+,0.00),-42(CAGGTG,+,0.00),-21(CAGGTG,+,0.00),0(CAGGTG,+,0.00),21(CAGGTG,+,0.00),42(CAGGTG,+,0.00)
chr2-305	chr2	165317409	165317709	0(CAGCTG,+,0.00)
chr9-228	chr9	45256719	45257019	0(CAGCTG,+,0.00),20(CAGCTG,+,0.00),40(CAGCTG,+,0.00),60(CAGCTG,+,0.00),80(CAGCTG,+,0.00),100(CAGCTG,+,0.00),120(CAGCTG,+,0.00),140(CAGCTG,+,0.00)
chr11-341	chr11	6157188	6157488		-58(CAGGTG,+,0.00),0(CAGGTG,+,0.00)	44(CACCTG,+,0.00)
chr4-213	chr4	140273226	140273526	-147(CAGCTG,+,0.00)	-91(CAGGTG,+,0.00),-77(CAGGTG,+,0.00),-68(CAGGTG,+,0.00),-50(CAGGTG,+,0.00),-32(CAGGTG,+,0.00),-9(CAGGTG,+,0.00),0(CAGGTG,+,0.00),14(CAGGTG,+,0.00),23(CAGGTG,+,0.00),41(CAGGTG,+,0.00),59(CAGGTG,+,0.00),68(CAGGTG,+,0.00),91(CAGGTG,+,0.00),100(CAGGTG,+,0.00),109(CAGGTG,+,0.00),132(CAGGTG,+,0.00)
chr16-131	chr16	45336524	45336824	-102(CAGCTG,+,0.00),-27(CAGCTG,+,0.00),0(CAGCTG,+,0.00),85(CAGCTG,+,0.00),142(CAGCTG,+,0.00)
chr11-396	chr11	99792697	99792997	-45(CAGCTG,+,0.00),-30(CAGCTG,+,0.00),-15(CAGCTG,+,0.00),30(CAGCTG,+,0.00),105(CAGCTG,+,0.00),120(CAGCTG,+,0.00)	-135(CAGGTG,+,0.00),-120(CAGGTG,+,0.00),-105(CAGGTG,+,0.00),0(CAGGTG,+,0.00)
chr13-167	chr13	64101491	64101791	0(CAGCTG,+,0.00)
chr15-159	chr15	86963011	86963311		-105(CAGGTG,+,0.00),-98(CAGGTG,+,0.00),-70(CAGGTG,+,0.00),-49(CAGGTG,+,0.00),-21(CAGGTG,+,0.00),-14(CAGGTG,+,0.00),0(CAGGTG,+,0.00),14(CAGGTG,+,0.00),28(CAGGTG,+,0.00),67(CAGGTG,+,0.00),81(CAGGTG,+,0.00),95(CAGGTG,+,0.00),102(CAGGTG,+,0.00),109(CAGGTG,+,0.00),116(CAGGTG,+,0.00),123(CAGGTG,+,0.00)
chr1-205	chr1	38904203	38904503	0(CAGCTG,+,0.00)	-141(CAGGTG,+,0.00)
chr10-174	chr10	77787883	77788183	-60(CAGCTG,+,0.00),-30(CAGCTG,+,0.00),0(CAGCTG,+,0.00)	-113(CAGGTG,+,0.00)	132(CACCTG,+,0.00)
chr19-82	chr19	24317838	24318138		-42(CAGGTG,+,0.00),-32(CAGGTG,+,0.00),0(CAGGTG,+,0.00)	-147(CACCTG,+,0.00)
chr4-287	chr4	134430455	134430755	-77(CAGCTG,+,0.00),-35(CAGCTG,+,0.00),0(CAGCTG,+,0.00)
chr10-162	chr10	61473133	61473433		0(CAGGTG,+,0.00)
chr4-283	chr4	128204986	128205286		-69(CAGGTG,+,0.00),-46(CAGGTG,+,0.00),-23(CAGGTG,+,0.00),0(CAGGTG,+,0.00),23(CAGGTG,+,0.00)
chr8-166	chr8	46745132	46745432	0(CAGCTG,+,0.00)
chr7-270	chr7	142120539	142120839	-69(CAGCTG,+,0.00),-21(CAGCTG,+,0.00),0(CAGCTG,+,0.00)	81(CAGGTG,+,0.00),100(CAGGTG,+,0.00)
chr5-219	chr5	52424775	52425075		-84(CAGGTG,+,0.00),-72(CAGGTG,+,0.00),-60(CAGGTG,+,0.00),-48(CAGGTG,+,0.00),-36(CAGGTG,+,0.00),-24(CAGGTG,+,0.00),0(CAGGTG,+,0.00),12(CAGGTG,+,0.00),26(CAGGTG,+,0.00),38(CAGGTG,+,0.00)
chr11-398	chr11	100264450	100264750	0(CAGCTG,+,0.00),33(CAGCTG,+,0.00),42(CAGCTG,+,0.00)		-48(CACCTG,+,0.00)
chr4-270	chr4	115116458	115116758		-78(CAGGTG,+,0.00),-60(CAGGTG,+,0.00),-48(CAGGTG,+,0.00),-24(CAGGTG,+,0.00),-12(CAGGTG,+,0.00),0(CAGGTG,+,0.00),18(CAGGTG,+,0.00),54(CAGGTG,+,0.00),60(CAGGTG,+,0.00),78(CAGGTG,+,0.00),132(CAGGTG,+,0.00)
chr14-87	chr14	21149768	21150068		-28(CAGGTG,+,0.00),0(CAGGTG,+,0.00),28(CAGGTG,+,0.00)	-21(CACCTG,+,0.00),7(CACCTG,+,0.00),35(CACCTG,+,0.00),111(CACCTG,+,0.00)
chr4-290	chr4	135287427	135287727		0(CAGGTG,+,0.00)	32(CACCTG,+,0.00)
chr11-409	chr11	112912938	112913238	53(CAGCTG,+,0.00)	0(CAGGTG,+,0.00)	-38(CACCTG,+,0.00)
chr14-104	chr14	61058338	61058638		0(CAGGTG,+,0.00)
chr4-274	chr4	123593785	123594085	-35(CAGCTG,+,0.00),0(CAGCTG,+,0.00)
chr1-203	chr1	37546905	37547205	-102(CAGCTG,+,0.00),0(CAGCTG,+,0.00),84(CAGCTG,+,0.00)
chr17-187	chr17	28037009	28037309	0(CAGCTG,+,0.00),61(CAGCTG,+,0.00),85(CAGCTG,+,0.00),96(CAGCTG,+,0.00)
chr1-245	chr1	136552770	136553070		-79(CAGGTG,+,0.00),0(CAGGTG,+,0.00)
chr11-361	chr11	51943101	51943401	-102(CAGCTG,+,0.00),0(CAGCTG,+,0.00)	-55(CAGGTG,+,0.00)
chr16-136	chr16	89973833	89974133	-51(CAGCTG,+,0.00),0(CAGCTG,+,0.00),13(CAGCTG,+,0.00)	-36(CAGGTG,+,0.00),86(CAGGTG,+,0.00)	-107(CACCTG,+,0.00)
chr11-381	chr11	78411260	78411560		-60(CAGGTG,+,0.00),-45(CAGGTG,+,0.00),-30(CAGGTG,+,0.00),-15(CAGGTG,+,0.00),0(CAGGTG,+,0.00),15(CAGGTG,+,0.00),34(CAGGTG,+,0.00),49(CAGGTG,+,0.00),68(CAGGTG,+,0.00),83(CAGGTG,+,0.00),98(CAGGTG,+,0.00)
chr5-261	chr5	140021840	140022140	-113(CAGCTG,+,0.00),0(CAGCTG,+,0.00)	-93(CAGGTG,+,0.00)
chr16-106	chr16	13981725	13982025		0(CAGGTG,+,0.00),45(CAGGTG,+,0.00)

## Sheet: ASCL2_open
PeakID	Chr	Start	End	CAGCTG Distance From Peak(sequence,strand,conservation)	CAGGTG Distance From Peak(sequence,strand,conservation)	CACCTG Distance From Peak(sequence,strand,conservation)
Merged-chr10-115184977-1	chr10	115184828	115185128	0(CAGCTG,+,0.00)
Merged-chr2-78189752-2	chr2	78189604	78189904	-13(CAGCTG,+,0.00),0(CAGCTG,+,0.00),47(CAGCTG,+,0.00),108(CAGCTG,+,0.00),139(CAGCTG,+,0.00)	-74(CAGGTG,+,0.00)
Merged-chr2-152804521-2	chr2	152804381	152804681	-105(CAGCTG,+,0.00),42(CAGCTG,+,0.00),72(CAGCTG,+,0.00)	0(CAGGTG,+,0.00)	-21(CACCTG,+,0.00)
Merged-chr9-75683947-2	chr9	75683782	75684082		-8(CAGGTG,+,0.00),0(CAGGTG,+,0.00)
Merged-chr19-47019525-2	chr19	47019389	47019689	-53(CAGCTG,+,0.00),0(CAGCTG,+,0.00)
Merged-chr9-108567243-2	chr9	108567094	108567394	0(CAGCTG,+,0.00)		-103(CACCTG,+,0.00),8(CACCTG,+,0.00),27(CACCTG,+,0.00)
Merged-chr7-75914203-2	chr7	75914041	75914341	-55(CAGCTG,+,0.00),-43(CAGCTG,+,0.00),0(CAGCTG,+,0.00)
Merged-chr12-28817535-2	chr12	28817378	28817678	-61(CAGCTG,+,0.00),0(CAGCTG,+,0.00)	108(CAGGTG,+,0.00)	141(CACCTG,+,0.00)
Merged-chr7-16944561-2	chr7	16944420	16944720	-30(CAGCTG,+,0.00),0(CAGCTG,+,0.00)		-48(CACCTG,+,0.00)
Merged-chr1-190448430-2	chr1	190448270	190448570		-38(CAGGTG,+,0.00),0(CAGGTG,+,0.00),11(CAGGTG,+,0.00)
Merged-chr10-110856192-2	chr10	110856029	110856329	-100(CAGCTG,+,0.00),0(CAGCTG,+,0.00)
Merged-chr18-43687827-2	chr18	43687668	43687968	0(CAGCTG,+,0.00)
Merged-chr6-99010007-2	chr6	99009850	99010150	0(CAGCTG,+,0.00)	-51(CAGGTG,+,0.00)
Merged-chr11-43653247-1	chr11	43653094	43653394	0(CAGCTG,+,0.00),14(CAGCTG,+,0.00)		-105(CACCTG,+,0.00)
Merged-chr2-25319084-2	chr2	25318932	25319232	0(CAGCTG,+,0.00),47(CAGCTG,+,0.00)
Merged-chr15-96333603-2	chr15	96333469	96333769	0(CAGCTG,+,0.00),20(CAGCTG,+,0.00)
Merged-chr7-37467092-2	chr7	37466937	37467237	-26(CAGCTG,+,0.00)	0(CAGGTG,+,0.00)	22(CACCTG,+,0.00),95(CACCTG,+,0.00)
Merged-chr17-24632608-2	chr17	24632460	24632760	0(CAGCTG,+,0.00)
Merged-chr8-69176507-2	chr8	69176368	69176668	0(CAGCTG,+,0.00),34(CAGCTG,+,0.00)		-43(CACCTG,+,0.00),126(CACCTG,+,0.00)
Merged-chr4-80912100-2	chr4	80911948	80912248	-75(CAGCTG,+,0.00),0(CAGCTG,+,0.00),6(CAGCTG,+,0.00),42(CAGCTG,+,0.00)	121(CAGGTG,+,0.00)
Merged-chr10-13641955-2	chr10	13641807	13642107		-36(CAGGTG,+,0.00),0(CAGGTG,+,0.00),15(CAGGTG,+,0.00)
Merged-chr14-24254063-2	chr14	24253912	24254212	-11(CAGCTG,+,0.00),0(CAGCTG,+,0.00),101(CAGCTG,+,0.00)
Merged-chr3-108857004-2	chr3	108856874	108857174		0(CAGGTG,+,0.00)	-115(CACCTG,+,0.00),12(CACCTG,+,0.00)
Merged-chr1-118459209-1	chr1	118459035	118459335		0(CAGGTG,+,0.00)
Merged-chr8-122523235-2	chr8	122523084	122523384	0(CAGCTG,+,0.00)
Merged-chr2-105263410-2	chr2	105263259	105263559	0(CAGCTG,+,0.00)		-30(CACCTG,+,0.00)
Merged-chr6-60363916-2	chr6	60363784	60364084	0(CAGCTG,+,0.00)	22(CAGGTG,+,0.00)
Merged-chr3-66973887-1	chr3	66973737	66974037	0(CAGCTG,+,0.00),6(CAGCTG,+,0.00)	-45(CAGGTG,+,0.00),-33(CAGGTG,+,0.00)
Merged-chr17-52601444-2	chr17	52601307	52601607		-41(CAGGTG,+,0.00),0(CAGGTG,+,0.00),61(CAGGTG,+,0.00)
Merged-chr9-65109589-2	chr9	65109451	65109751	0(CAGCTG,+,0.00)
Merged-chr6-72795016-2	chr6	72794865	72795165	0(CAGCTG,+,0.00)		21(CACCTG,+,0.00)
Merged-chr2-154426766-2	chr2	154426614	154426914	-109(CAGCTG,+,0.00),0(CAGCTG,+,0.00),26(CAGCTG,+,0.00)
Merged-chr3-31094418-2	chr3	31094259	31094559	-58(CAGCTG,+,0.00),0(CAGCTG,+,0.00)		122(CACCTG,+,0.00)
Merged-chr1-63110743-2	chr1	63110591	63110891	-135(CAGCTG,+,0.00),0(CAGCTG,+,0.00)	-13(CAGGTG,+,0.00)
Merged-chr6-38730656-2	chr6	38730515	38730815	-25(CAGCTG,+,0.00)	0(CAGGTG,+,0.00)
Merged-chr8-75093610-2	chr8	75093459	75093759	-49(CAGCTG,+,0.00),0(CAGCTG,+,0.00)
Merged-chr3-86223677-2	chr3	86223519	86223819	-114(CAGCTG,+,0.00),-54(CAGCTG,+,0.00),0(CAGCTG,+,0.00),60(CAGCTG,+,0.00)
Merged-chr5-72444145-2	chr5	72443983	72444283	0(CAGCTG,+,0.00),15(CAGCTG,+,0.00)
Merged-chr15-38384473-2	chr15	38384325	38384625	0(CAGCTG,+,0.00)	-46(CAGGTG,+,0.00)
Merged-chr10-3941149-2	chr10	3940997	3941297	0(CAGCTG,+,0.00)		-60(CACCTG,+,0.00)
Merged-chr6-5482601-2	chr6	5482443	5482743	-27(CAGCTG,+,0.00),0(CAGCTG,+,0.00)
Merged-chr4-129113300-2	chr4	129113163	129113463	-50(CAGCTG,+,0.00),51(CAGCTG,+,0.00)	0(CAGGTG,+,0.00)
Merged-chr11-93968284-2	chr11	93968149	93968449	0(CAGCTG,+,0.00)
Merged-chr9-37054339-2	chr9	37054191	37054491	-11(CAGCTG,+,0.00),0(CAGCTG,+,0.00)
Merged-chr10-67979763-2	chr10	67979633	67979933	-60(CAGCTG,+,0.00),0(CAGCTG,+,0.00)	27(CAGGTG,+,0.00)
Merged-chr15-103215379-2	chr15	103215221	103215521	-22(CAGCTG,+,0.00),0(CAGCTG,+,0.00)
Merged-chr16-16912050-2	chr16	16911905	16912205	0(CAGCTG,+,0.00)		48(CACCTG,+,0.00)
Merged-chr12-100202027-2	chr12	100201883	100202183	0(CAGCTG,+,0.00)
Merged-chr14-122255645-2	chr14	122255496	122255796	0(CAGCTG,+,0.00)	31(CAGGTG,+,0.00)
Merged-chr4-130520028-2	chr4	130519878	130520178		0(CAGGTG,+,0.00)	-16(CACCTG,+,0.00)
Merged-chr10-4387177-2	chr10	4387033	4387333	-18(CAGCTG,+,0.00),0(CAGCTG,+,0.00)
Merged-chr5-145280450-2	chr5	145280304	145280604		0(CAGGTG,+,0.00)	-50(CACCTG,+,0.00)
Merged-chr2-38689016-2	chr2	38688864	38689164	0(CAGCTG,+,0.00)
Merged-chr1-54485107-2	chr1	54484956	54485256	-37(CAGCTG,+,0.00),0(CAGCTG,+,0.00)
Merged-chr2-84837298-2	chr2	84837146	84837446	0(CAGCTG,+,0.00)	-28(CAGGTG,+,0.00)
Merged-chr5-23418525-2	chr5	23418375	23418675	0(CAGCTG,+,0.00)
Merged-chr14-45507265-1	chr14	45507121	45507421	-74(CAGCTG,+,0.00),0(CAGCTG,+,0.00)		-43(CACCTG,+,0.00)
Merged-chr9-69289925-2	chr9	69289777	69290077	-9(CAGCTG,+,0.00),0(CAGCTG,+,0.00)
Merged-chr8-4205480-2	chr8	4205347	4205647	-64(CAGCTG,+,0.00),0(CAGCTG,+,0.00)	-37(CAGGTG,+,0.00)	-44(CACCTG,+,0.00)
Merged-chr2-26903020-2	chr2	26902872	26903172	0(CAGCTG,+,0.00)
Merged-chr5-102845176-2	chr5	102845046	102845346	0(CAGCTG,+,0.00)		-45(CACCTG,+,0.00)
Merged-chr8-56252544-2	chr8	56252401	56252701	0(CAGCTG,+,0.00),35(CAGCTG,+,0.00)
Merged-chr14-79769845-2	chr14	79769696	79769996		0(CAGGTG,+,0.00)
Merged-chr16-18348035-2	chr16	18347887	18348187	-27(CAGCTG,+,0.00)	0(CAGGTG,+,0.00)
Merged-chr15-80977837-1	chr15	80977674	80977974	0(CAGCTG,+,0.00)	-96(CAGGTG,+,0.00)	-44(CACCTG,+,0.00)
Merged-chr12-82616838-2	chr12	82616694	82616994	35(CAGCTG,+,0.00)	-74(CAGGTG,+,0.00),-38(CAGGTG,+,0.00),0(CAGGTG,+,0.00),14(CAGGTG,+,0.00)
Merged-chr2-112676914-2	chr2	112676765	112677065	0(CAGCTG,+,0.00),103(CAGCTG,+,0.00)
Merged-chr8-108715370-2	chr8	108715237	108715537		-59(CAGGTG,+,0.00),0(CAGGTG,+,0.00)
Merged-chr5-117413636-2	chr5	117413481	117413781		0(CAGGTG,+,0.00),22(CAGGTG,+,0.00)
Merged-chr13-9329499-2	chr13	9329352	9329652	0(CAGCTG,+,0.00),41(CAGCTG,+,0.00)
Merged-chr11-40050692-2	chr11	40050552	40050852		0(CAGGTG,+,0.00),31(CAGGTG,+,0.00)
Merged-chr8-79031081-2	chr8	79030945	79031245	0(CAGCTG,+,0.00)
Merged-chr8-41374579-2	chr8	41374440	41374740	-149(CAGCTG,+,0.00),0(CAGCTG,+,0.00),34(CAGCTG,+,0.00)	-55(CAGGTG,+,0.00),-31(CAGGTG,+,0.00)
Merged-chr11-47640902-2	chr11	47640756	47641056	0(CAGCTG,+,0.00),49(CAGCTG,+,0.00),98(CAGCTG,+,0.00)
Merged-chr10-81037225-2	chr10	81037091	81037391		0(CAGGTG,+,0.00)
Merged-chr13-73604031-2	chr13	73603889	73604189	0(CAGCTG,+,0.00)
Merged-chr8-107425111-1	chr8	107424965	107425265	0(CAGCTG,+,0.00)
Merged-chr2-20665790-2	chr2	20665638	20665938	0(CAGCTG,+,0.00)		-12(CACCTG,+,0.00)
Merged-chr8-105259812-2	chr8	105259646	105259946	0(CAGCTG,+,0.00),27(CAGCTG,+,0.00)	16(CAGGTG,+,0.00)
Merged-chr8-89003538-2	chr8	89003390	89003690	-18(CAGCTG,+,0.00),0(CAGCTG,+,0.00)	-124(CAGGTG,+,0.00)
Merged-chr14-54383777-2	chr14	54383615	54383915	0(CAGCTG,+,0.00),25(CAGCTG,+,0.00)	120(CAGGTG,+,0.00)
Merged-chr3-19694153-2	chr3	19694002	19694302	0(CAGCTG,+,0.00)
Merged-chr17-23610718-2	chr17	23610570	23610870	19(CAGCTG,+,0.00)	-84(CAGGTG,+,0.00),-72(CAGGTG,+,0.00),0(CAGGTG,+,0.00),99(CAGGTG,+,0.00),111(CAGGTG,+,0.00)
Merged-chr13-40258930-2	chr13	40258784	40259084	0(CAGCTG,+,0.00)	-15(CAGGTG,+,0.00)
Merged-chr16-11176332-2	chr16	11176184	11176484	0(CAGCTG,+,0.00)		-117(CACCTG,+,0.00)
Merged-chr11-120065481-2	chr11	120065330	120065630	0(CAGCTG,+,0.00)		-69(CACCTG,+,0.00),27(CACCTG,+,0.00),69(CACCTG,+,0.00)
Merged-chr17-87282889-2	chr17	87282757	87283057	0(CAGCTG,+,0.00)
Merged-chr2-140671374-2	chr2	140671223	140671523	-85(CAGCTG,+,0.00),0(CAGCTG,+,0.00)
Merged-chr13-41249840-2	chr13	41249683	41249983	0(CAGCTG,+,0.00)
Merged-chr5-52471240-2	chr5	52471107	52471407		-22(CAGGTG,+,0.00),0(CAGGTG,+,0.00)
Merged-chr8-8690487-2	chr8	8690349	8690649	0(CAGCTG,+,0.00)
Merged-chr6-122764983-2	chr6	122764841	122765141	-140(CAGCTG,+,0.00)	0(CAGGTG,+,0.00),22(CAGGTG,+,0.00)
Merged-chr10-25708125-2	chr10	25707969	25708269	69(CAGCTG,+,0.00)	0(CAGGTG,+,0.00)
Merged-chr2-152739538-2	chr2	152739404	152739704	-139(CAGCTG,+,0.00),0(CAGCTG,+,0.00)	-95(CAGGTG,+,0.00)
Merged-chr17-33817724-1	chr17	33817555	33817855	0(CAGCTG,+,0.00)		-93(CACCTG,+,0.00)
Merged-chr6-67146168-2	chr6	67146030	67146330		0(CAGGTG,+,0.00)	100(CACCTG,+,0.00)
Merged-chr4-43957596-2	chr4	43957456	43957756	0(CAGCTG,+,0.00),81(CAGCTG,+,0.00)
Merged-chr5-134006894-1	chr5	134006734	134007034	-43(CAGCTG,+,0.00),0(CAGCTG,+,0.00)
Merged-chr10-111164644-2	chr10	111164492	111164792	0(CAGCTG,+,0.00)
Merged-chr6-136471087-2	chr6	136470938	136471238	0(CAGCTG,+,0.00)
Merged-chr9-121314295-1	chr9	121314131	121314431	0(CAGCTG,+,0.00)
Merged-chr2-113327807-1	chr2	113327658	113327958	0(CAGCTG,+,0.00)	-18(CAGGTG,+,0.00)
Merged-chr14-78289000-2	chr14	78288859	78289159	0(CAGCTG,+,0.00)	-31(CAGGTG,+,0.00)
Merged-chr2-144369193-2	chr2	144369049	144369349	0(CAGCTG,+,0.00)
Merged-chr3-22156525-2	chr3	22156371	22156671	0(CAGCTG,+,0.00)		-15(CACCTG,+,0.00)
Merged-chr11-5741358-2	chr11	5741200	5741500	-35(CAGCTG,+,0.00)	0(CAGGTG,+,0.00)
Merged-chr1-167002659-1	chr1	167002524	167002824	0(CAGCTG,+,0.00)
Merged-chr16-65815548-2	chr16	65815400	65815700	0(CAGCTG,+,0.00),24(CAGCTG,+,0.00)
Merged-chr5-149636413-2	chr5	149636282	149636582	0(CAGCTG,+,0.00)
Merged-chr15-102399667-2	chr15	102399515	102399815	0(CAGCTG,+,0.00),37(CAGCTG,+,0.00)
Merged-chrX-143543336-2	chrX	143543181	143543481	0(CAGCTG,+,0.00)		-69(CACCTG,+,0.00)
Merged-chr16-85528421-2	chr16	85528266	85528566	-61(CAGCTG,+,0.00)	0(CAGGTG,+,0.00)
Merged-chr7-45162313-2	chr7	45162179	45162479		0(CAGGTG,+,0.00)	-58(CACCTG,+,0.00)
Merged-chr12-109542970-2	chr12	109542821	109543121	0(CAGCTG,+,0.00)		-31(CACCTG,+,0.00)
Merged-chr10-128035526-2	chr10	128035377	128035677	0(CAGCTG,+,0.00)
Merged-chr15-102203535-1	chr15	102203383	102203683	0(CAGCTG,+,0.00)
Merged-chr9-112207999-2	chr9	112207851	112208151	-110(CAGCTG,+,0.00),0(CAGCTG,+,0.00),87(CAGCTG,+,0.00)	-54(CAGGTG,+,0.00)
Merged-chr6-125592243-2	chr6	125592083	125592383	34(CAGCTG,+,0.00)	0(CAGGTG,+,0.00)
Merged-chr11-83964466-2	chr11	83964299	83964599	0(CAGCTG,+,0.00)		-100(CACCTG,+,0.00)
Merged-chr9-102690261-2	chr9	102690101	102690401		0(CAGGTG,+,0.00)
Merged-chr10-21102155-2	chr10	21102021	21102321	0(CAGCTG,+,0.00)	52(CAGGTG,+,0.00)
Merged-chr2-128818327-1	chr2	128818167	128818467	91(CAGCTG,+,0.00)	-38(CAGGTG,+,0.00),0(CAGGTG,+,0.00)
Merged-chr17-66479914-2	chr17	66479776	66480076	0(CAGCTG,+,0.00)
Merged-chr14-20702993-1	chr14	20702841	20703141	0(CAGCTG,+,0.00)
Merged-chr13-84348260-2	chr13	84348120	84348420	0(CAGCTG,+,0.00)
Merged-chr7-122289142-2	chr7	122288998	122289298	-125(CAGCTG,+,0.00),-43(CAGCTG,+,0.00),-18(CAGCTG,+,0.00),0(CAGCTG,+,0.00)
Merged-chr1-17506940-2	chr1	17506780	17507080	0(CAGCTG,+,0.00)	-92(CAGGTG,+,0.00),-60(CAGGTG,+,0.00)
Merged-chr3-88553600-1	chr3	88553447	88553747	-33(CAGCTG,+,0.00),0(CAGCTG,+,0.00)
Merged-chr7-80746564-1	chr7	80746415	80746715	-96(CAGCTG,+,0.00),130(CAGCTG,+,0.00)	-104(CAGGTG,+,0.00),0(CAGGTG,+,0.00)
Merged-chr10-99132379-2	chr10	99132223	99132523	-72(CAGCTG,+,0.00),0(CAGCTG,+,0.00),26(CAGCTG,+,0.00)	-21(CAGGTG,+,0.00)
Merged-chr7-101302195-2	chr7	101302027	101302327		0(CAGGTG,+,0.00)
Merged-chr15-88862477-2	chr15	88862341	88862641	0(CAGCTG,+,0.00)
Merged-chr13-86345473-2	chr13	86345323	86345623	-109(CAGCTG,+,0.00)	-103(CAGGTG,+,0.00),0(CAGGTG,+,0.00)
Merged-chr7-80833218-2	chr7	80833082	80833382	-112(CAGCTG,+,0.00),54(CAGCTG,+,0.00)	0(CAGGTG,+,0.00)
Merged-chr18-38601670-2	chr18	38601502	38601802	0(CAGCTG,+,0.00)
Merged-chr7-90460507-1	chr7	90460372	90460672	0(CAGCTG,+,0.00)
Merged-chr1-86509620-2	chr1	86509472	86509772	23(CAGCTG,+,0.00)	0(CAGGTG,+,0.00)
Merged-chr17-15990410-2	chr17	15990271	15990571	0(CAGCTG,+,0.00),57(CAGCTG,+,0.00)
Merged-chr7-6760227-2	chr7	6760072	6760372		-41(CAGGTG,+,0.00),0(CAGGTG,+,0.00),18(CAGGTG,+,0.00)
Merged-chr9-76565841-2	chr9	76565703	76566003	0(CAGCTG,+,0.00)		13(CACCTG,+,0.00)
Merged-chr19-11912372-2	chr19	11912222	11912522	0(CAGCTG,+,0.00)
Merged-chr14-7954179-2	chr14	7954032	7954332	0(CAGCTG,+,0.00)
Merged-chr1-36244290-2	chr1	36244139	36244439	0(CAGCTG,+,0.00)
Merged-chr1-42851093-1	chr1	42850946	42851246	0(CAGCTG,+,0.00)
Merged-chrX-107858360-2	chrX	107858225	107858525	0(CAGCTG,+,0.00)
Merged-chr3-127257776-1	chr3	127257625	127257925	0(CAGCTG,+,0.00)
Merged-chr18-44644041-1	chr18	44643904	44644204	0(CAGCTG,+,0.00)		15(CACCTG,+,0.00)
Merged-chr12-86498931-1	chr12	86498769	86499069	0(CAGCTG,+,0.00)	61(CAGGTG,+,0.00)	20(CACCTG,+,0.00)
Merged-chr8-13786144-1	chr8	13785994	13786294	42(CAGCTG,+,0.00)	0(CAGGTG,+,0.00),107(CAGGTG,+,0.00)	-26(CACCTG,+,0.00)
Merged-chr16-9281054-2	chr16	9280901	9281201	0(CAGCTG,+,0.00)		-65(CACCTG,+,0.00)
Merged-chr4-10932587-2	chr4	10932443	10932743		-34(CAGGTG,+,0.00),0(CAGGTG,+,0.00)
Merged-chr6-49367835-1	chr6	49367702	49368002	0(CAGCTG,+,0.00)
Merged-chr17-24550142-2	chr17	24549975	24550275	0(CAGCTG,+,0.00)
Merged-chr15-97993011-1	chr15	97992876	97993176	0(CAGCTG,+,0.00)
Merged-chr17-36271469-1	chr17	36271328	36271628	0(CAGCTG,+,0.00)	145(CAGGTG,+,0.00)
Merged-chr6-115037891-2	chr6	115037758	115038058	0(CAGCTG,+,0.00)
Merged-chr7-6999111-2	chr7	6998983	6999283	-33(CAGCTG,+,0.00),-6(CAGCTG,+,0.00),109(CAGCTG,+,0.00)	0(CAGGTG,+,0.00)
Merged-chr11-20113175-2	chr11	20113012	20113312		0(CAGGTG,+,0.00)	75(CACCTG,+,0.00)
Merged-chr17-74994093-1	chr17	74993944	74994244	0(CAGCTG,+,0.00)
Merged-chr6-143162392-1	chr6	143162243	143162543	0(CAGCTG,+,0.00)	37(CAGGTG,+,0.00)
Merged-chr8-122523566-2	chr8	122523419	122523719	0(CAGCTG,+,0.00),23(CAGCTG,+,0.00)	121(CAGGTG,+,0.00)	-103(CACCTG,+,0.00)
Merged-chr8-117314744-2	chr8	117314586	117314886	0(CAGCTG,+,0.00)	-31(CAGGTG,+,0.00)
Merged-chr11-58938950-1	chr11	58938818	58939118	0(CAGCTG,+,0.00),30(CAGCTG,+,0.00),89(CAGCTG,+,0.00)
Merged-chr19-40271506-2	chr19	40271360	40271660	0(CAGCTG,+,0.00)
Merged-chr11-20231267-2	chr11	20231137	20231437	0(CAGCTG,+,0.00)
Merged-chr17-56762243-1	chr17	56762092	56762392	-91(CAGCTG,+,0.00),0(CAGCTG,+,0.00)	129(CAGGTG,+,0.00)
Merged-chr4-155173628-2	chr4	155173471	155173771	-73(CAGCTG,+,0.00),0(CAGCTG,+,0.00)
Merged-chr11-28171459-2	chr11	28171322	28171622	-33(CAGCTG,+,0.00)	0(CAGGTG,+,0.00),7(CAGGTG,+,0.00)
Merged-chr2-106694352-1	chr2	106694191	106694491	0(CAGCTG,+,0.00)		-70(CACCTG,+,0.00)
Merged-chr14-118436969-2	chr14	118436816	118437116	-32(CAGCTG,+,0.00),0(CAGCTG,+,0.00)
Merged-chr10-25314313-2	chr10	25314147	25314447		-39(CAGGTG,+,0.00),0(CAGGTG,+,0.00)
Merged-chr5-92042539-2	chr5	92042389	92042689	-16(CAGCTG,+,0.00)	0(CAGGTG,+,0.00)
Merged-chr2-20654929-1	chr2	20654777	20655077	0(CAGCTG,+,0.00)
Merged-chr16-44139861-2	chr16	44139716	44140016	0(CAGCTG,+,0.00)
Merged-chr15-91078258-1	chr15	91078118	91078418	-11(CAGCTG,+,0.00)	0(CAGGTG,+,0.00)
Merged-chr3-143100981-2	chr3	143100845	143101145	0(CAGCTG,+,0.00)
Merged-chr14-122267772-2	chr14	122267615	122267915		0(CAGGTG,+,0.00)	-115(CACCTG,+,0.00),-45(CACCTG,+,0.00),11(CACCTG,+,0.00)
Merged-chr15-99875407-2	chr15	99875253	99875553		0(CAGGTG,+,0.00)
Merged-chr9-22052078-1	chr9	22051916	22052216	0(CAGCTG,+,0.00)		-74(CACCTG,+,0.00)
Merged-chr7-6770351-2	chr7	6770208	6770508	0(CAGCTG,+,0.00)
Merged-chr4-109476590-1	chr4	109476441	109476741	0(CAGCTG,+,0.00),12(CAGCTG,+,0.00)
Merged-chr11-63533708-2	chr11	63533556	63533856	0(CAGCTG,+,0.00)	-6(CAGGTG,+,0.00)
Merged-chr9-66514299-1	chr9	66514172	66514472		0(CAGGTG,+,0.00),90(CAGGTG,+,0.00)
Merged-chr18-73225081-2	chr18	73224940	73225240	-75(CAGCTG,+,0.00),-51(CAGCTG,+,0.00)	0(CAGGTG,+,0.00)	-27(CACCTG,+,0.00)
Merged-chr3-84040265-1	chr3	84040100	84040400	0(CAGCTG,+,0.00)
Merged-chr8-123515439-2	chr8	123515277	123515577	0(CAGCTG,+,0.00)		-49(CACCTG,+,0.00)
Merged-chr15-36792850-2	chr15	36792701	36793001	0(CAGCTG,+,0.00)
Merged-chr17-72836231-1	chr17	72836073	72836373	30(CAGCTG,+,0.00),105(CAGCTG,+,0.00)	0(CAGGTG,+,0.00)
Merged-chr6-120666199-1	chr6	120666048	120666348	0(CAGCTG,+,0.00)	126(CAGGTG,+,0.00)
Merged-chr17-47511431-2	chr17	47511280	47511580	-38(CAGCTG,+,0.00),0(CAGCTG,+,0.00)	19(CAGGTG,+,0.00)
Merged-chr3-146404480-2	chr3	146404340	146404640	15(CAGCTG,+,0.00)	0(CAGGTG,+,0.00)	-133(CACCTG,+,0.00)
Merged-chr6-94647674-2	chr6	94647542	94647842		0(CAGGTG,+,0.00)	133(CACCTG,+,0.00)
Merged-chr2-10048734-1	chr2	10048598	10048898		0(CAGGTG,+,0.00),27(CAGGTG,+,0.00)
Merged-chr15-81831684-2	chr15	81831536	81831836	0(CAGCTG,+,0.00)
Merged-chr19-7268203-2	chr19	7268056	7268356	0(CAGCTG,+,0.00)
Merged-chr10-128891385-2	chr10	128891233	128891533	0(CAGCTG,+,0.00)
Merged-chr12-86801283-1	chr12	86801147	86801447	0(CAGCTG,+,0.00)
Merged-chr1-12814564-2	chr1	12814427	12814727	-18(CAGCTG,+,0.00)	-117(CAGGTG,+,0.00),0(CAGGTG,+,0.00)
Merged-chr2-146855925-2	chr2	146855761	146856061	0(CAGCTG,+,0.00)
Merged-chr12-113140397-2	chr12	113140250	113140550	26(CAGCTG,+,0.00)	0(CAGGTG,+,0.00)
Merged-chr2-59612075-2	chr2	59611924	59612224	0(CAGCTG,+,0.00)
Merged-chr5-33275088-2	chr5	33274939	33275239	0(CAGCTG,+,0.00),78(CAGCTG,+,0.00)
Merged-chr12-76710221-1	chr12	76710062	76710362		-30(CAGGTG,+,0.00),0(CAGGTG,+,0.00)
Merged-chr10-46690020-2	chr10	46689874	46690174	-80(CAGCTG,+,0.00),0(CAGCTG,+,0.00)	51(CAGGTG,+,0.00)
Merged-chr1-86526449-2	chr1	86526309	86526609	0(CAGCTG,+,0.00)
Merged-chr11-115564455-2	chr11	115564307	115564607	0(CAGCTG,+,0.00)
Merged-chr4-125652002-2	chr4	125651839	125652139	10(CAGCTG,+,0.00)	0(CAGGTG,+,0.00),74(CAGGTG,+,0.00)
Merged-chr6-87937545-2	chr6	87937400	87937700	-84(CAGCTG,+,0.00),0(CAGCTG,+,0.00),6(CAGCTG,+,0.00)
Merged-chr5-30907910-1	chr5	30907762	30908062	0(CAGCTG,+,0.00),10(CAGCTG,+,0.00)
Merged-chr18-42899459-2	chr18	42899328	42899628	0(CAGCTG,+,0.00)
Merged-chr6-116671140-2	chr6	116670985	116671285	-106(CAGCTG,+,0.00),0(CAGCTG,+,0.00)	44(CAGGTG,+,0.00)
Merged-chr17-37029042-1	chr17	37028905	37029205	0(CAGCTG,+,0.00)
Merged-chr3-11212470-1	chr3	11212331	11212631		0(CAGGTG,+,0.00),28(CAGGTG,+,0.00)
Merged-chr17-28224168-2	chr17	28224016	28224316	-141(CAGCTG,+,0.00),0(CAGCTG,+,0.00)	18(CAGGTG,+,0.00)
Merged-chr15-25984334-2	chr15	25984195	25984495	0(CAGCTG,+,0.00)
Merged-chr16-20611525-2	chr16	20611376	20611676	0(CAGCTG,+,0.00)
Merged-chr2-113829111-1	chr2	113828964	113829264		0(CAGGTG,+,0.00)	-139(CACCTG,+,0.00)
Merged-chr18-33950682-2	chr18	33950545	33950845		0(CAGGTG,+,0.00)
Merged-chr12-86502032-2	chr12	86501895	86502195		0(CAGGTG,+,0.00)
Merged-chr13-67683669-2	chr13	67683501	67683801	0(CAGCTG,+,0.00)
Merged-chr9-37657433-1	chr9	37657294	37657594		0(CAGGTG,+,0.00)
Merged-chr19-41013770-1	chr19	41013642	41013942		0(CAGGTG,+,0.00),65(CAGGTG,+,0.00)
Merged-chr17-17740062-2	chr17	17739914	17740214		0(CAGGTG,+,0.00),28(CAGGTG,+,0.00)
Merged-chr7-29162910-2	chr7	29162761	29163061	0(CAGCTG,+,0.00)
Merged-chr3-101163605-2	chr3	101163438	101163738		0(CAGGTG,+,0.00)
Merged-chr7-19817611-2	chr7	19817455	19817755	-48(CAGCTG,+,0.00),0(CAGCTG,+,0.00)
Merged-chr13-51846636-2	chr13	51846475	51846775	0(CAGCTG,+,0.00)
Merged-chr11-16591669-2	chr11	16591521	16591821	0(CAGCTG,+,0.00)
Merged-chr13-102896188-1	chr13	102896027	102896327		0(CAGGTG,+,0.00)	23(CACCTG,+,0.00)
Merged-chr10-67549380-1	chr10	67549224	67549524	0(CAGCTG,+,0.00)
Merged-chr19-23162577-1	chr19	23162434	23162734		0(CAGGTG,+,0.00)
Merged-chr4-33198316-2	chr4	33198148	33198448	0(CAGCTG,+,0.00)
Merged-chr18-81252099-1	chr18	81251944	81252244	0(CAGCTG,+,0.00)
Merged-chr3-75165033-1	chr3	75164863	75165163	0(CAGCTG,+,0.00)	-111(CAGGTG,+,0.00),18(CAGGTG,+,0.00),53(CAGGTG,+,0.00)
Merged-chr12-25475628-2	chr12	25475485	25475785	0(CAGCTG,+,0.00)	-26(CAGGTG,+,0.00)
Merged-chr11-116853798-1	chr11	116853642	116853942	0(CAGCTG,+,0.00),54(CAGCTG,+,0.00)
Merged-chr9-110732838-2	chr9	110732698	110732998	0(CAGCTG,+,0.00)
Merged-chr11-64089895-2	chr11	64089749	64090049	0(CAGCTG,+,0.00),48(CAGCTG,+,0.00)
Merged-chr1-4802730-2	chr1	4802560	4802860		0(CAGGTG,+,0.00)
Merged-chr12-40917630-2	chr12	40917473	40917773	0(CAGCTG,+,0.00)	15(CAGGTG,+,0.00),96(CAGGTG,+,0.00)	-112(CACCTG,+,0.00),89(CACCTG,+,0.00)
Merged-chr4-55532720-2	chr4	55532572	55532872	0(CAGCTG,+,0.00)
Merged-chr5-81519567-2	chr5	81519413	81519713	-86(CAGCTG,+,0.00),-20(CAGCTG,+,0.00),0(CAGCTG,+,0.00)
Merged-chr9-110408155-2	chr9	110408016	110408316	0(CAGCTG,+,0.00)
Merged-chr15-28071329-2	chr15	28071165	28071465		0(CAGGTG,+,0.00)
Merged-chr15-12848394-2	chr15	12848246	12848546	0(CAGCTG,+,0.00),24(CAGCTG,+,0.00)
Merged-chr7-38061207-2	chr7	38061056	38061356	0(CAGCTG,+,0.00)
Merged-chr10-14967824-2	chr10	14967667	14967967	100(CAGCTG,+,0.00)	-20(CAGGTG,+,0.00),0(CAGGTG,+,0.00)
Merged-chr17-15248171-2	chr17	15248024	15248324		0(CAGGTG,+,0.00)
Merged-chr1-192834843-2	chr1	192834693	192834993	-10(CAGCTG,+,0.00),0(CAGCTG,+,0.00)
Merged-chr6-41605131-1	chr6	41604997	41605297	0(CAGCTG,+,0.00)
Merged-chr5-81654229-2	chr5	81654084	81654384	0(CAGCTG,+,0.00)	-35(CAGGTG,+,0.00)
Merged-chr17-33718659-1	chr17	33718508	33718808		0(CAGGTG,+,0.00)
Merged-chr16-82596634-1	chr16	82596464	82596764		-44(CAGGTG,+,0.00),0(CAGGTG,+,0.00)
Merged-chr10-33196109-2	chr10	33195960	33196260	0(CAGCTG,+,0.00),69(CAGCTG,+,0.00)
Merged-chr1-180933866-2	chr1	180933715	180934015	0(CAGCTG,+,0.00)
Merged-chr7-126885060-1	chr7	126884924	126885224	0(CAGCTG,+,0.00)
Merged-chr1-91413379-2	chr1	91413222	91413522	0(CAGCTG,+,0.00)
Merged-chr6-59169152-2	chr6	59168984	59169284		0(CAGGTG,+,0.00),45(CAGGTG,+,0.00)	-75(CACCTG,+,0.00)
Merged-chr5-140584052-2	chr5	140583903	140584203		0(CAGGTG,+,0.00)
Merged-chr19-55099438-2	chr19	55099289	55099589	0(CAGCTG,+,0.00)	108(CAGGTG,+,0.00)
Merged-chr11-26372147-2	chr11	26371997	26372297		0(CAGGTG,+,0.00),45(CAGGTG,+,0.00)
Merged-chr6-83441635-1	chr6	83441495	83441795	0(CAGCTG,+,0.00)
Merged-chr9-107612810-1	chr9	107612659	107612959	0(CAGCTG,+,0.00),66(CAGCTG,+,0.00)
Merged-chr1-146427008-2	chr1	146426847	146427147	-6(CAGCTG,+,0.00),91(CAGCTG,+,0.00)	0(CAGGTG,+,0.00)
Merged-chr5-135001456-2	chr5	135001300	135001600	-129(CAGCTG,+,0.00)	0(CAGGTG,+,0.00),35(CAGGTG,+,0.00)
Merged-chr1-72960323-2	chr1	72960179	72960479	0(CAGCTG,+,0.00),72(CAGCTG,+,0.00)
Merged-chr8-61550170-2	chr8	61550018	61550318	-58(CAGCTG,+,0.00)	0(CAGGTG,+,0.00)	-131(CACCTG,+,0.00)
Merged-chr9-89704858-2	chr9	89704725	89705025	0(CAGCTG,+,0.00)		-132(CACCTG,+,0.00)
Merged-chr3-65659252-2	chr3	65659093	65659393	0(CAGCTG,+,0.00)
Merged-chr9-57163403-1	chr9	57163247	57163547		0(CAGGTG,+,0.00),45(CAGGTG,+,0.00)
Merged-chr2-138265435-2	chr2	138265266	138265566	0(CAGCTG,+,0.00)
Merged-chr17-47521824-2	chr17	47521666	47521966	-25(CAGCTG,+,0.00),0(CAGCTG,+,0.00)
Merged-chr14-103650491-2	chr14	103650342	103650642	0(CAGCTG,+,0.00)	-39(CAGGTG,+,0.00)	120(CACCTG,+,0.00)
Merged-chr13-3712738-1	chr13	3712574	3712874	0(CAGCTG,+,0.00)		-46(CACCTG,+,0.00)
Merged-chr3-9520269-2	chr3	9520113	9520413	24(CAGCTG,+,0.00)	0(CAGGTG,+,0.00)
Merged-chr2-112379418-2	chr2	112379269	112379569	0(CAGCTG,+,0.00)		14(CACCTG,+,0.00)
Merged-chr10-123076571-2	chr10	123076410	123076710	0(CAGCTG,+,0.00),50(CAGCTG,+,0.00)		13(CACCTG,+,0.00)
Merged-chr10-80399916-1	chr10	80399771	80400071		0(CAGGTG,+,0.00),71(CAGGTG,+,0.00)
Merged-chr11-20145573-2	chr11	20145433	20145733		0(CAGGTG,+,0.00),45(CAGGTG,+,0.00)
Merged-chrX-135008844-2	chrX	135008700	135009000	0(CAGCTG,+,0.00)	-50(CAGGTG,+,0.00),78(CAGGTG,+,0.00)
Merged-chr3-146852409-1	chr3	146852260	146852560	0(CAGCTG,+,0.00),9(CAGCTG,+,0.00)
Merged-chr8-122460712-2	chr8	122460558	122460858		0(CAGGTG,+,0.00),96(CAGGTG,+,0.00)
Merged-chr18-5163489-2	chr18	5163338	5163638	0(CAGCTG,+,0.00)
Merged-chr7-63957091-2	chr7	63956940	63957240	10(CAGCTG,+,0.00)	0(CAGGTG,+,0.00)
Merged-chr10-86972217-2	chr10	86972079	86972379	0(CAGCTG,+,0.00)
Merged-chr1-52953289-2	chr1	52953131	52953431		0(CAGGTG,+,0.00),82(CAGGTG,+,0.00),99(CAGGTG,+,0.00)	15(CACCTG,+,0.00)
Merged-chr1-189142746-2	chr1	189142604	189142904	0(CAGCTG,+,0.00)		-62(CACCTG,+,0.00)
Merged-chr13-89739457-1	chr13	89739305	89739605	0(CAGCTG,+,0.00),8(CAGCTG,+,0.00)
Merged-chr6-24348465-2	chr6	24348313	24348613	-16(CAGCTG,+,0.00),0(CAGCTG,+,0.00)
Merged-chr4-40143400-2	chr4	40143253	40143553	0(CAGCTG,+,0.00)
Merged-chr17-42876754-1	chr17	42876604	42876904	-99(CAGCTG,+,0.00),0(CAGCTG,+,0.00)		-52(CACCTG,+,0.00),-10(CACCTG,+,0.00)
Merged-chr18-74065106-1	chr18	74064946	74065246	0(CAGCTG,+,0.00),35(CAGCTG,+,0.00)	-102(CAGGTG,+,0.00),53(CAGGTG,+,0.00)
Merged-chr10-110745000-2	chr10	110744855	110745155		0(CAGGTG,+,0.00)	25(CACCTG,+,0.00)
Merged-chr14-61648860-1	chr14	61648723	61649023	0(CAGCTG,+,0.00)
Merged-chr2-135073205-2	chr2	135073063	135073363	0(CAGCTG,+,0.00)
Merged-chr5-134688910-2	chr5	134688767	134689067	-42(CAGCTG,+,0.00),0(CAGCTG,+,0.00)
Merged-chr10-17723244-1	chr10	17723096	17723396	0(CAGCTG,+,0.00)
Merged-chr17-17625036-2	chr17	17624877	17625177	0(CAGCTG,+,0.00)
Merged-chr3-90224544-1	chr3	90224407	90224707		0(CAGGTG,+,0.00)
Merged-chr10-49417619-2	chr10	49417462	49417762	0(CAGCTG,+,0.00)
Merged-chr4-88938562-2	chr4	88938417	88938717	0(CAGCTG,+,0.00)		-75(CACCTG,+,0.00)
Merged-chr13-109260308-2	chr13	109260163	109260463	0(CAGCTG,+,0.00)
Merged-chr13-32802285-1	chr13	32802136	32802436	-59(CAGCTG,+,0.00)	-89(CAGGTG,+,0.00),0(CAGGTG,+,0.00)	54(CACCTG,+,0.00)
Merged-chr5-113942845-2	chr5	113942690	113942990	0(CAGCTG,+,0.00)		22(CACCTG,+,0.00)
Merged-chr9-47530346-2	chr9	47530211	47530511		0(CAGGTG,+,0.00)
Merged-chr2-172516634-1	chr2	172516474	172516774		0(CAGGTG,+,0.00)
Merged-chr13-60177829-2	chr13	60177676	60177976	0(CAGCTG,+,0.00)
Merged-chr15-8568805-2	chr15	8568653	8568953	0(CAGCTG,+,0.00)	10(CAGGTG,+,0.00)
Merged-chr1-194619907-1	chr1	194619758	194620058	-17(CAGCTG,+,0.00),0(CAGCTG,+,0.00)
Merged-chr16-3884481-2	chr16	3884332	3884632	0(CAGCTG,+,0.00),15(CAGCTG,+,0.00)
Merged-chr13-100786727-2	chr13	100786600	100786900		0(CAGGTG,+,0.00)
Merged-chr9-115545948-1	chr9	115545799	115546099	0(CAGCTG,+,0.00)	48(CAGGTG,+,0.00)
Merged-chr8-68368549-2	chr8	68368414	68368714	110(CAGCTG,+,0.00)	-57(CAGGTG,+,0.00),0(CAGGTG,+,0.00)
Merged-chr14-8214195-2	chr14	8214029	8214329	0(CAGCTG,+,0.00)
Merged-chr7-28338717-2	chr7	28338561	28338861	-18(CAGCTG,+,0.00)	0(CAGGTG,+,0.00)
Merged-chr2-44927659-2	chr2	44927494	44927794		0(CAGGTG,+,0.00)	15(CACCTG,+,0.00)
Merged-chr9-3524222-2	chr9	3524067	3524367	-35(CAGCTG,+,0.00),0(CAGCTG,+,0.00)	23(CAGGTG,+,0.00)
Merged-chr8-40939306-2	chr8	40939169	40939469		-138(CAGGTG,+,0.00),0(CAGGTG,+,0.00)
Merged-chr9-70817501-1	chr9	70817343	70817643	-126(CAGCTG,+,0.00)	0(CAGGTG,+,0.00),16(CAGGTG,+,0.00)
Merged-chr12-99300161-2	chr12	99300021	99300321	0(CAGCTG,+,0.00)		79(CACCTG,+,0.00)
Merged-chr13-66312013-2	chr13	66311843	66312143		0(CAGGTG,+,0.00)	-134(CACCTG,+,0.00)
Merged-chr15-73707406-2	chr15	73707272	73707572	0(CAGCTG,+,0.00)
Merged-chr10-9901207-2	chr10	9901053	9901353	-102(CAGCTG,+,0.00),0(CAGCTG,+,0.00)
Merged-chr13-63980129-2	chr13	63979981	63980281	-27(CAGCTG,+,0.00),0(CAGCTG,+,0.00)
Merged-chr7-84689556-2	chr7	84689404	84689704	0(CAGCTG,+,0.00)		116(CACCTG,+,0.00)
Merged-chr10-58540802-2	chr10	58540650	58540950	-99(CAGCTG,+,0.00),0(CAGCTG,+,0.00)
Merged-chr9-105309742-1	chr9	105309586	105309886	-97(CAGCTG,+,0.00),0(CAGCTG,+,0.00)
Merged-chr17-73488035-2	chr17	73487888	73488188	0(CAGCTG,+,0.00)		-26(CACCTG,+,0.00)
Merged-chr11-53769875-2	chr11	53769725	53770025	0(CAGCTG,+,0.00)
Merged-chr12-39742335-1	chr12	39742168	39742468	0(CAGCTG,+,0.00)
Merged-chr15-73466813-2	chr15	73466647	73466947	0(CAGCTG,+,0.00)
Merged-chr18-35098836-2	chr18	35098670	35098970	0(CAGCTG,+,0.00)	31(CAGGTG,+,0.00)
Merged-chr1-178336733-2	chr1	178336600	178336900	0(CAGCTG,+,0.00)
Merged-chr10-89443625-2	chr10	89443452	89443752		0(CAGGTG,+,0.00)	116(CACCTG,+,0.00)
Merged-chr6-148444484-2	chr6	148444328	148444628	-140(CAGCTG,+,0.00),0(CAGCTG,+,0.00),134(CAGCTG,+,0.00)	14(CAGGTG,+,0.00)
Merged-chr7-127708865-2	chr7	127708715	127709015	0(CAGCTG,+,0.00)
Merged-chr10-128525840-2	chr10	128525703	128526003	0(CAGCTG,+,0.00)	-126(CAGGTG,+,0.00)	-138(CACCTG,+,0.00)
Merged-chr15-41789363-2	chr15	41789208	41789508	0(CAGCTG,+,0.00)		26(CACCTG,+,0.00),42(CACCTG,+,0.00)
Merged-chr16-15637951-2	chr16	15637783	15638083	-57(CAGCTG,+,0.00),0(CAGCTG,+,0.00)
Merged-chr17-30576479-1	chr17	30576334	30576634		0(CAGGTG,+,0.00)
Merged-chr9-57836767-2	chr9	57836616	57836916	-23(CAGCTG,+,0.00),0(CAGCTG,+,0.00)		-142(CACCTG,+,0.00)
Merged-chr14-123660270-1	chr14	123660125	123660425	0(CAGCTG,+,0.00),98(CAGCTG,+,0.00)
Merged-chr17-15380708-2	chr17	15380569	15380869	0(CAGCTG,+,0.00)
Merged-chr3-141931518-2	chr3	141931349	141931649	0(CAGCTG,+,0.00)
Merged-chr19-14835874-2	chr19	14835746	14836046	-6(CAGCTG,+,0.00)	0(CAGGTG,+,0.00)
Merged-chr10-79755047-2	chr10	79754903	79755203	0(CAGCTG,+,0.00),29(CAGCTG,+,0.00)		-105(CACCTG,+,0.00)
Merged-chr10-96309227-1	chr10	96309079	96309379	-86(CAGCTG,+,0.00),0(CAGCTG,+,0.00)
Merged-chr15-6909922-2	chr15	6909754	6910054	-119(CAGCTG,+,0.00),0(CAGCTG,+,0.00)
Merged-chr11-67011852-2	chr11	67011710	67012010	0(CAGCTG,+,0.00),63(CAGCTG,+,0.00)
Merged-chr19-4510494-2	chr19	4510361	4510661	0(CAGCTG,+,0.00)
Merged-chr17-14818216-2	chr17	14818068	14818368	0(CAGCTG,+,0.00)
Merged-chr2-135658611-1	chr2	135658454	135658754	-52(CAGCTG,+,0.00)	0(CAGGTG,+,0.00)
Merged-chr2-32713432-2	chr2	32713305	32713605	-49(CAGCTG,+,0.00)	0(CAGGTG,+,0.00),110(CAGGTG,+,0.00)
Merged-chr3-136669672-2	chr3	136669508	136669808	0(CAGCTG,+,0.00),18(CAGCTG,+,0.00)
Merged-chr3-109782444-2	chr3	109782288	109782588	-34(CAGCTG,+,0.00),0(CAGCTG,+,0.00)
Merged-chr14-122416426-2	chr14	122416256	122416556		0(CAGGTG,+,0.00)
Merged-chr13-112987605-1	chr13	112987466	112987766	-59(CAGCTG,+,0.00),0(CAGCTG,+,0.00)
Merged-chr10-7956644-2	chr10	7956476	7956776		0(CAGGTG,+,0.00)
Merged-chr16-93711933-2	chr16	93711799	93712099	0(CAGCTG,+,0.00)
Merged-chr11-3290281-1	chr11	3290134	3290434	0(CAGCTG,+,0.00)
Merged-chr5-8243440-2	chr5	8243303	8243603	0(CAGCTG,+,0.00)		-139(CACCTG,+,0.00)
Merged-chr1-166154326-1	chr1	166154170	166154470		0(CAGGTG,+,0.00)	-46(CACCTG,+,0.00)
Merged-chr3-137867342-1	chr3	137867183	137867483	0(CAGCTG,+,0.00)		-43(CACCTG,+,0.00),-36(CACCTG,+,0.00)
Merged-chr9-25401100-1	chr9	25400959	25401259	0(CAGCTG,+,0.00)
Merged-chr11-115187530-1	chr11	115187394	115187694	0(CAGCTG,+,0.00)		112(CACCTG,+,0.00)
Merged-chr13-93771856-2	chr13	93771709	93772009	-27(CAGCTG,+,0.00),0(CAGCTG,+,0.00)		132(CACCTG,+,0.00)
Merged-chrX-95253742-2	chrX	95253612	95253912	0(CAGCTG,+,0.00)		12(CACCTG,+,0.00)
Merged-chr8-3279579-2	chr8	3279426	3279726	0(CAGCTG,+,0.00)	65(CAGGTG,+,0.00)
Merged-chr9-94670486-2	chr9	94670337	94670637	-51(CAGCTG,+,0.00),0(CAGCTG,+,0.00)
Merged-chr15-38519464-2	chr15	38519298	38519598		0(CAGGTG,+,0.00)
Merged-chr5-31240936-1	chr5	31240775	31241075	0(CAGCTG,+,0.00)
Merged-chr19-55714802-1	chr19	55714661	55714961	0(CAGCTG,+,0.00)	34(CAGGTG,+,0.00)
Merged-chr4-116720995-2	chr4	116720841	116721141	0(CAGCTG,+,0.00)
Merged-chr4-114987236-2	chr4	114987077	114987377	0(CAGCTG,+,0.00),102(CAGCTG,+,0.00)
Merged-chr2-181188951-1	chr2	181188797	181189097	0(CAGCTG,+,0.00)	11(CAGGTG,+,0.00)
Merged-chr11-20772921-2	chr11	20772783	20773083	0(CAGCTG,+,0.00)	-130(CAGGTG,+,0.00),-86(CAGGTG,+,0.00)
Merged-chr15-44787773-2	chr15	44787626	44787926	0(CAGCTG,+,0.00)		58(CACCTG,+,0.00)
Merged-chr5-60700179-2	chr5	60700038	60700338		0(CAGGTG,+,0.00)	39(CACCTG,+,0.00)
Merged-chr16-30064180-1	chr16	30064012	30064312	0(CAGCTG,+,0.00)
Merged-chr2-38658707-1	chr2	38658546	38658846	-36(CAGCTG,+,0.00),106(CAGCTG,+,0.00)	0(CAGGTG,+,0.00)
Merged-chr11-9983140-2	chr11	9982995	9983295		0(CAGGTG,+,0.00)	23(CACCTG,+,0.00)
Merged-chr2-18998200-2	chr2	18998042	18998342	0(CAGCTG,+,0.00),113(CAGCTG,+,0.00)
Merged-chr2-126552991-2	chr2	126552854	126553154		0(CAGGTG,+,0.00)
Merged-chr1-125435916-1	chr1	125435766	125436066	0(CAGCTG,+,0.00)
Merged-chr8-16591612-2	chr8	16591472	16591772	0(CAGCTG,+,0.00)
Merged-chr10-26695366-1	chr10	26695214	26695514	-114(CAGCTG,+,0.00),0(CAGCTG,+,0.00),69(CAGCTG,+,0.00),101(CAGCTG,+,0.00)
Merged-chr1-165194425-2	chr1	165194273	165194573		0(CAGGTG,+,0.00),8(CAGGTG,+,0.00)
Merged-chr9-21337838-1	chr9	21337703	21338003	-95(CAGCTG,+,0.00),0(CAGCTG,+,0.00)
Merged-chr6-126939545-1	chr6	126939401	126939701	0(CAGCTG,+,0.00)		-60(CACCTG,+,0.00)
Merged-chr7-49527674-2	chr7	49527544	49527844	0(CAGCTG,+,0.00),99(CAGCTG,+,0.00)
Merged-chr18-9865894-1	chr18	9865738	9866038	0(CAGCTG,+,0.00)	30(CAGGTG,+,0.00)
Merged-chr5-118436903-2	chr5	118436758	118437058		0(CAGGTG,+,0.00)
Merged-chr7-17056249-1	chr7	17056112	17056412	-109(CAGCTG,+,0.00)	0(CAGGTG,+,0.00)	-67(CACCTG,+,0.00)
Merged-chr7-145139253-2	chr7	145139109	145139409	0(CAGCTG,+,0.00)
Merged-chr11-63927046-2	chr11	63926897	63927197	-23(CAGCTG,+,0.00),0(CAGCTG,+,0.00)
Merged-chr13-23555112-1	chr13	23554982	23555282		-15(CAGGTG,+,0.00),0(CAGGTG,+,0.00)
Merged-chr4-19709137-1	chr4	19708988	19709288	0(CAGCTG,+,0.00)
Merged-chr17-12992587-1	chr17	12992461	12992761		0(CAGGTG,+,0.00)
Merged-chr15-52967963-2	chr15	52967811	52968111	-48(CAGCTG,+,0.00),-30(CAGCTG,+,0.00),0(CAGCTG,+,0.00)
Merged-chr6-142756681-1	chr6	142756532	142756832	0(CAGCTG,+,0.00)		-89(CACCTG,+,0.00)
Merged-chr11-3932115-2	chr11	3931954	3932254	0(CAGCTG,+,0.00),25(CAGCTG,+,0.00)
Merged-chr3-41557370-1	chr3	41557209	41557509	0(CAGCTG,+,0.00)
Merged-chr9-83834281-1	chr9	83834142	83834442	0(CAGCTG,+,0.00)
Merged-chr9-51815878-2	chr9	51815746	51816046		0(CAGGTG,+,0.00),62(CAGGTG,+,0.00),135(CAGGTG,+,0.00)	43(CACCTG,+,0.00),49(CACCTG,+,0.00)
Merged-chr16-63213716-1	chr16	63213580	63213880	0(CAGCTG,+,0.00)
Merged-chr7-3332060-1	chr7	3331920	3332220	0(CAGCTG,+,0.00),46(CAGCTG,+,0.00)
Merged-chr8-91133751-2	chr8	91133605	91133905		-17(CAGGTG,+,0.00),0(CAGGTG,+,0.00)
Merged-chr8-32009676-2	chr8	32009535	32009835	0(CAGCTG,+,0.00)
Merged-chr10-4712756-1	chr10	4712596	4712896	0(CAGCTG,+,0.00)		-33(CACCTG,+,0.00)
Merged-chr8-80738496-1	chr8	80738345	80738645	-123(CAGCTG,+,0.00),0(CAGCTG,+,0.00)		78(CACCTG,+,0.00)
Merged-chr10-108162460-1	chr10	108162291	108162591	0(CAGCTG,+,0.00)
Merged-chr4-54073154-1	chr4	54073019	54073319	0(CAGCTG,+,0.00)
Merged-chr11-3409186-1	chr11	3409061	3409361		0(CAGGTG,+,0.00)
Merged-chr9-90163058-1	chr9	90162900	90163200	-52(CAGCTG,+,0.00),0(CAGCTG,+,0.00)
Merged-chr11-68691412-2	chr11	68691267	68691567		0(CAGGTG,+,0.00)
Merged-chr7-41452032-1	chr7	41451876	41452176	91(CAGCTG,+,0.00)	0(CAGGTG,+,0.00)
Merged-chr10-94426545-1	chr10	94426395	94426695	0(CAGCTG,+,0.00)
Merged-chr9-53536631-1	chr9	53536483	53536783	0(CAGCTG,+,0.00)
Merged-chr15-25762477-1	chr15	25762321	25762621	-12(CAGCTG,+,0.00)	0(CAGGTG,+,0.00)	-127(CACCTG,+,0.00)
Merged-chr1-20554566-1	chr1	20554415	20554715	0(CAGCTG,+,0.00)
Merged-chr11-19829830-2	chr11	19829682	19829982	0(CAGCTG,+,0.00)
Merged-chr8-119515853-2	chr8	119515700	119516000	0(CAGCTG,+,0.00)
Merged-chr7-105581326-1	chr7	105581195	105581495	0(CAGCTG,+,0.00)
Merged-chr2-136891069-2	chr2	136890909	136891209	0(CAGCTG,+,0.00)	14(CAGGTG,+,0.00)	130(CACCTG,+,0.00)
Merged-chr7-113774247-1	chr7	113774093	113774393	0(CAGCTG,+,0.00)	-138(CAGGTG,+,0.00)
Merged-chr4-40723172-2	chr4	40723036	40723336		0(CAGGTG,+,0.00)
Merged-chr17-75551895-1	chr17	75551747	75552047	0(CAGCTG,+,0.00)
Merged-chr2-155729378-2	chr2	155729223	155729523	0(CAGCTG,+,0.00)	140(CAGGTG,+,0.00)
Merged-chr5-105700754-1	chr5	105700606	105700906		0(CAGGTG,+,0.00)
Merged-chr14-25318214-1	chr14	25318039	25318339		0(CAGGTG,+,0.00)
Merged-chr1-78657622-2	chr1	78657463	78657763	0(CAGCTG,+,0.00)
Merged-chr3-96278121-1	chr3	96277959	96278259	-91(CAGCTG,+,0.00),0(CAGCTG,+,0.00)
Merged-chr7-78910859-2	chr7	78910710	78911010	46(CAGCTG,+,0.00),114(CAGCTG,+,0.00)	0(CAGGTG,+,0.00)
Merged-chr4-129222703-2	chr4	129222561	129222861	-143(CAGCTG,+,0.00),0(CAGCTG,+,0.00)	-26(CAGGTG,+,0.00),-20(CAGGTG,+,0.00)
Merged-chr5-37163362-2	chr5	37163210	37163510	-12(CAGCTG,+,0.00),0(CAGCTG,+,0.00),105(CAGCTG,+,0.00)	63(CAGGTG,+,0.00)
Merged-chr6-85187495-2	chr6	85187355	85187655		-33(CAGGTG,+,0.00),0(CAGGTG,+,0.00)
Merged-chr18-65965272-1	chr18	65965123	65965423		0(CAGGTG,+,0.00)
Merged-chrX-43430838-2	chrX	43430690	43430990	0(CAGCTG,+,0.00),26(CAGCTG,+,0.00)
Merged-chrX-153119151-2	chrX	153119020	153119320	123(CAGCTG,+,0.00)	-104(CAGGTG,+,0.00),0(CAGGTG,+,0.00)
Merged-chr7-100607494-1	chr7	100607328	100607628	0(CAGCTG,+,0.00)
Merged-chrX-20356361-2	chrX	20356221	20356521	0(CAGCTG,+,0.00)
Merged-chr3-45375987-2	chr3	45375851	45376151	0(CAGCTG,+,0.00)
Merged-chr5-134099758-1	chr5	134099599	134099899	0(CAGCTG,+,0.00)
Merged-chr17-23599036-2	chr17	23598898	23599198	0(CAGCTG,+,0.00)
Merged-chr15-7226481-2	chr15	7226329	7226629	-104(CAGCTG,+,0.00),-11(CAGCTG,+,0.00)	0(CAGGTG,+,0.00),50(CAGGTG,+,0.00)
Merged-chr9-54586337-2	chr9	54586197	54586497	-59(CAGCTG,+,0.00),0(CAGCTG,+,0.00)
Merged-chr10-120171643-1	chr10	120171507	120171807	0(CAGCTG,+,0.00)	18(CAGGTG,+,0.00)
Merged-chr13-35741671-2	chr13	35741524	35741824	0(CAGCTG,+,0.00)
Merged-chr6-122342350-2	chr6	122342182	122342482		0(CAGGTG,+,0.00)
Merged-chr12-80228129-1	chr12	80227959	80228259		0(CAGGTG,+,0.00)
Merged-chr4-109676784-2	chr4	109676644	109676944	0(CAGCTG,+,0.00)
Merged-chr2-39190998-2	chr2	39190863	39191163		-55(CAGGTG,+,0.00),0(CAGGTG,+,0.00)	99(CACCTG,+,0.00)
Merged-chr4-135273104-2	chr4	135272942	135273242	0(CAGCTG,+,0.00)
Merged-chr19-53142316-1	chr19	53142153	53142453	0(CAGCTG,+,0.00)
Merged-chr15-59082428-1	chr15	59082284	59082584		0(CAGGTG,+,0.00)
Merged-chr11-28583333-2	chr11	28583164	28583464	0(CAGCTG,+,0.00)	135(CAGGTG,+,0.00)
Merged-chr2-93334500-1	chr2	93334351	93334651	0(CAGCTG,+,0.00)
Merged-chr1-143777238-1	chr1	143777090	143777390		0(CAGGTG,+,0.00)
Merged-chr2-52072135-1	chr2	52071996	52072296		0(CAGGTG,+,0.00),35(CAGGTG,+,0.00)
Merged-chr8-31128507-2	chr8	31128359	31128659	0(CAGCTG,+,0.00),16(CAGCTG,+,0.00)	67(CAGGTG,+,0.00)
Merged-chr18-31568959-1	chr18	31568816	31569116		0(CAGGTG,+,0.00)
Merged-chr5-18688729-2	chr5	18688602	18688902	81(CAGCTG,+,0.00)	0(CAGGTG,+,0.00)
Merged-chr17-24352008-2	chr17	24351860	24352160		0(CAGGTG,+,0.00)
Merged-chr16-28753203-1	chr16	28753044	28753344		0(CAGGTG,+,0.00)
Merged-chr10-121476231-1	chr10	121476087	121476387	0(CAGCTG,+,0.00)
Merged-chr10-36507260-1	chr10	36507125	36507425	0(CAGCTG,+,0.00)		44(CACCTG,+,0.00)
Merged-chr13-75707508-1	chr13	75707344	75707644	0(CAGCTG,+,0.00)
Merged-chr1-66700759-1	chr1	66700624	66700924	-49(CAGCTG,+,0.00),0(CAGCTG,+,0.00)		-73(CACCTG,+,0.00)
Merged-chr4-57956681-1	chr4	57956517	57956817	0(CAGCTG,+,0.00)
Merged-chr16-58670549-1	chr16	58670394	58670694	0(CAGCTG,+,0.00),45(CAGCTG,+,0.00)
Merged-chr14-45658097-2	chr14	45657949	45658249	0(CAGCTG,+,0.00)
Merged-chr6-93849501-2	chr6	93849363	93849663		0(CAGGTG,+,0.00)
Merged-chr2-112265824-1	chr2	112265681	112265981	0(CAGCTG,+,0.00),21(CAGCTG,+,0.00)		40(CACCTG,+,0.00)
Merged-chr10-47466132-2	chr10	47465980	47466280	0(CAGCTG,+,0.00)		-84(CACCTG,+,0.00)
Merged-chr18-23041887-2	chr18	23041738	23042038	98(CAGCTG,+,0.00)	0(CAGGTG,+,0.00),28(CAGGTG,+,0.00)
Merged-chr7-118992651-2	chr7	118992498	118992798	-28(CAGCTG,+,0.00),0(CAGCTG,+,0.00)
Merged-chr6-67170428-2	chr6	67170260	67170560	-142(CAGCTG,+,0.00)	0(CAGGTG,+,0.00)
Merged-chr10-50592714-1	chr10	50592583	50592883	0(CAGCTG,+,0.00)
Merged-chr13-87452635-2	chr13	87452490	87452790	0(CAGCTG,+,0.00),8(CAGCTG,+,0.00),16(CAGCTG,+,0.00)
Merged-chr18-70599890-2	chr18	70599752	70600052	0(CAGCTG,+,0.00),122(CAGCTG,+,0.00)		27(CACCTG,+,0.00)
Merged-chr1-190169031-2	chr1	190168884	190169184	0(CAGCTG,+,0.00)
Merged-chr4-117373746-1	chr4	117373606	117373906		0(CAGGTG,+,0.00)
Merged-chr5-27791397-1	chr5	27791238	27791538	0(CAGCTG,+,0.00)
Merged-chr11-87592212-1	chr11	87592044	87592344	0(CAGCTG,+,0.00)
Merged-chr6-85451244-2	chr6	85451099	85451399	0(CAGCTG,+,0.00)
Merged-chr9-14642673-2	chr9	14642507	14642807	0(CAGCTG,+,0.00)
Merged-chr4-124802575-2	chr4	124802421	124802721		0(CAGGTG,+,0.00)
Merged-chr9-108049070-1	chr9	108048904	108049204	0(CAGCTG,+,0.00)
Merged-chr5-149053245-1	chr5	149053101	149053401	0(CAGCTG,+,0.00)
Merged-chr1-166003351-1	chr1	166003197	166003497		0(CAGGTG,+,0.00)	43(CACCTG,+,0.00)
Merged-chr19-59585962-2	chr19	59585822	59586122	-65(CAGCTG,+,0.00),0(CAGCTG,+,0.00)
Merged-chr4-12171441-1	chr4	12171313	12171613		0(CAGGTG,+,0.00)
Merged-chr16-30641737-1	chr16	30641578	30641878	0(CAGCTG,+,0.00)	-82(CAGGTG,+,0.00)
Merged-chr16-14557354-1	chr16	14557215	14557515		0(CAGGTG,+,0.00),44(CAGGTG,+,0.00)
Merged-chr11-6444767-1	chr11	6444616	6444916	0(CAGCTG,+,0.00)
Merged-chr19-25610576-2	chr19	25610426	25610726	0(CAGCTG,+,0.00)
Merged-chr16-32608816-1	chr16	32608649	32608949		0(CAGGTG,+,0.00)
Merged-chr3-14886434-1	chr3	14886302	14886602	0(CAGCTG,+,0.00)
Merged-chr7-112743907-1	chr7	112743755	112744055	0(CAGCTG,+,0.00)
Merged-chr6-86849513-1	chr6	86849373	86849673	0(CAGCTG,+,0.00)		-136(CACCTG,+,0.00)
Merged-chr14-100750349-2	chr14	100750184	100750484	-71(CAGCTG,+,0.00),0(CAGCTG,+,0.00)
Merged-chr2-31572495-1	chr2	31572342	31572642		0(CAGGTG,+,0.00)	38(CACCTG,+,0.00)
Merged-chr15-51877688-1	chr15	51877544	51877844	-42(CAGCTG,+,0.00),-30(CAGCTG,+,0.00),0(CAGCTG,+,0.00)
Merged-chr9-75232251-1	chr9	75232093	75232393	0(CAGCTG,+,0.00)	37(CAGGTG,+,0.00),45(CAGGTG,+,0.00)
Merged-chr10-128909779-1	chr10	128909628	128909928	0(CAGCTG,+,0.00)
Merged-chr2-133596731-2	chr2	133596582	133596882	0(CAGCTG,+,0.00)
Merged-chr13-108214372-1	chr13	108214217	108214517		0(CAGGTG,+,0.00)	-68(CACCTG,+,0.00)
Merged-chr12-98737686-2	chr12	98737527	98737827	0(CAGCTG,+,0.00)
Merged-chr19-42795467-1	chr19	42795314	42795614	-47(CAGCTG,+,0.00)	0(CAGGTG,+,0.00)	68(CACCTG,+,0.00)
Merged-chr5-149229088-1	chr5	149228931	149229231	0(CAGCTG,+,0.00)
Merged-chr11-11114026-1	chr11	11113888	11114188	0(CAGCTG,+,0.00)	-145(CAGGTG,+,0.00)
Merged-chr6-119417659-1	chr6	119417508	119417808		0(CAGGTG,+,0.00)
Merged-chr16-97322817-1	chr16	97322669	97322969	0(CAGCTG,+,0.00)

## Sheet: ASCL2_closed
PeakID	Chr	Start	End	CAGCTG Distance From Peak(sequence,strand,conservation)	CAGGTG Distance From Peak(sequence,strand,conservation)	CACCTG Distance From Peak(sequence,strand,conservation)
Merged-chr17-28388722-2	chr17	28388572	28388872	-132(CAGCTG,+,0.00),-120(CAGCTG,+,0.00),-108(CAGCTG,+,0.00),-96(CAGCTG,+,0.00),-84(CAGCTG,+,0.00),-72(CAGCTG,+,0.00),-60(CAGCTG,+,0.00),-48(CAGCTG,+,0.00),-36(CAGCTG,+,0.00),-24(CAGCTG,+,0.00),0(CAGCTG,+,0.00),12(CAGCTG,+,0.00),24(CAGCTG,+,0.00),36(CAGCTG,+,0.00),48(CAGCTG,+,0.00),59(CAGCTG,+,0.00),71(CAGCTG,+,0.00)	-12(CAGGTG,+,0.00)
Merged-chr4-107366606-2	chr4	107366456	107366756		-99(CAGGTG,+,0.00),-88(CAGGTG,+,0.00),-77(CAGGTG,+,0.00),-66(CAGGTG,+,0.00),-55(CAGGTG,+,0.00),-44(CAGGTG,+,0.00),-33(CAGGTG,+,0.00),-22(CAGGTG,+,0.00),-11(CAGGTG,+,0.00),0(CAGGTG,+,0.00),11(CAGGTG,+,0.00),22(CAGGTG,+,0.00),33(CAGGTG,+,0.00),44(CAGGTG,+,0.00),55(CAGGTG,+,0.00),66(CAGGTG,+,0.00),74(CAGGTG,+,0.00)
Merged-chr8-83584930-2	chr8	83584778	83585078	-31(CAGCTG,+,0.00),0(CAGCTG,+,0.00),31(CAGCTG,+,0.00),62(CAGCTG,+,0.00),93(CAGCTG,+,0.00),124(CAGCTG,+,0.00)	-47(CAGGTG,+,0.00),-38(CAGGTG,+,0.00),-16(CAGGTG,+,0.00),-7(CAGGTG,+,0.00),15(CAGGTG,+,0.00),24(CAGGTG,+,0.00),46(CAGGTG,+,0.00),77(CAGGTG,+,0.00),86(CAGGTG,+,0.00),117(CAGGTG,+,0.00)
Merged-chr11-117451757-2	chr11	117451610	117451910		-150(CAGGTG,+,0.00),-126(CAGGTG,+,0.00),-102(CAGGTG,+,0.00),-84(CAGGTG,+,0.00),-78(CAGGTG,+,0.00),-60(CAGGTG,+,0.00),-54(CAGGTG,+,0.00),-36(CAGGTG,+,0.00),-18(CAGGTG,+,0.00),-6(CAGGTG,+,0.00),0(CAGGTG,+,0.00),12(CAGGTG,+,0.00),24(CAGGTG,+,0.00),36(CAGGTG,+,0.00),48(CAGGTG,+,0.00),54(CAGGTG,+,0.00),78(CAGGTG,+,0.00),84(CAGGTG,+,0.00),102(CAGGTG,+,0.00),132(CAGGTG,+,0.00),138(CAGGTG,+,0.00)
Merged-chr3-9540554-2	chr3	9540410	9540710	67(CAGCTG,+,0.00)	-143(CAGGTG,+,0.00),-130(CAGGTG,+,0.00),-117(CAGGTG,+,0.00),-104(CAGGTG,+,0.00),-91(CAGGTG,+,0.00),-78(CAGGTG,+,0.00),-65(CAGGTG,+,0.00),-52(CAGGTG,+,0.00),-39(CAGGTG,+,0.00),-26(CAGGTG,+,0.00),-13(CAGGTG,+,0.00),0(CAGGTG,+,0.00),13(CAGGTG,+,0.00),26(CAGGTG,+,0.00),39(CAGGTG,+,0.00)
Merged-chr17-7187181-2	chr17	7187028	7187328		-146(CAGGTG,+,0.00),-114(CAGGTG,+,0.00),-82(CAGGTG,+,0.00),-64(CAGGTG,+,0.00),-50(CAGGTG,+,0.00),-32(CAGGTG,+,0.00),-18(CAGGTG,+,0.00),0(CAGGTG,+,0.00),14(CAGGTG,+,0.00),32(CAGGTG,+,0.00),46(CAGGTG,+,0.00),64(CAGGTG,+,0.00),78(CAGGTG,+,0.00)
Merged-chr8-116608087-2	chr8	116607934	116608234		-120(CAGGTG,+,0.00),-108(CAGGTG,+,0.00),-96(CAGGTG,+,0.00),-84(CAGGTG,+,0.00),-72(CAGGTG,+,0.00),-60(CAGGTG,+,0.00),-48(CAGGTG,+,0.00),-36(CAGGTG,+,0.00),-24(CAGGTG,+,0.00),-12(CAGGTG,+,0.00),0(CAGGTG,+,0.00),12(CAGGTG,+,0.00),24(CAGGTG,+,0.00),36(CAGGTG,+,0.00),72(CAGGTG,+,0.00),96(CAGGTG,+,0.00),108(CAGGTG,+,0.00),120(CAGGTG,+,0.00),132(CAGGTG,+,0.00)
Merged-chr4-140171521-2	chr4	140171370	140171670		-119(CAGGTG,+,0.00),-107(CAGGTG,+,0.00),-88(CAGGTG,+,0.00),-76(CAGGTG,+,0.00),-57(CAGGTG,+,0.00),-38(CAGGTG,+,0.00),-19(CAGGTG,+,0.00),0(CAGGTG,+,0.00),19(CAGGTG,+,0.00),57(CAGGTG,+,0.00),76(CAGGTG,+,0.00),114(CAGGTG,+,0.00),133(CAGGTG,+,0.00),145(CAGGTG,+,0.00)
Merged-chr4-152572499-2	chr4	152572354	152572654	-104(CAGCTG,+,0.00),-52(CAGCTG,+,0.00),-26(CAGCTG,+,0.00),14(CAGCTG,+,0.00),79(CAGCTG,+,0.00),142(CAGCTG,+,0.00)	-117(CAGGTG,+,0.00),-78(CAGGTG,+,0.00),-65(CAGGTG,+,0.00),-39(CAGGTG,+,0.00),-13(CAGGTG,+,0.00),0(CAGGTG,+,0.00),27(CAGGTG,+,0.00),40(CAGGTG,+,0.00),53(CAGGTG,+,0.00),66(CAGGTG,+,0.00),92(CAGGTG,+,0.00),105(CAGGTG,+,0.00)
Merged-chr1-35995991-2	chr1	35995847	35996147	23(CAGCTG,+,0.00),40(CAGCTG,+,0.00)	-82(CAGGTG,+,0.00),-19(CAGGTG,+,0.00),0(CAGGTG,+,0.00)
Merged-chr9-121541683-2	chr9	121541536	121541836	-99(CAGCTG,+,0.00),-88(CAGCTG,+,0.00),-77(CAGCTG,+,0.00),-66(CAGCTG,+,0.00),-55(CAGCTG,+,0.00),-44(CAGCTG,+,0.00),-33(CAGCTG,+,0.00),-22(CAGCTG,+,0.00),-11(CAGCTG,+,0.00),0(CAGCTG,+,0.00),12(CAGCTG,+,0.00),23(CAGCTG,+,0.00),34(CAGCTG,+,0.00),46(CAGCTG,+,0.00),57(CAGCTG,+,0.00),80(CAGCTG,+,0.00),91(CAGCTG,+,0.00),102(CAGCTG,+,0.00),114(CAGCTG,+,0.00),125(CAGCTG,+,0.00)
Merged-chr4-57855529-2	chr4	57855381	57855681	-102(CAGCTG,+,0.00),0(CAGCTG,+,0.00),30(CAGCTG,+,0.00),45(CAGCTG,+,0.00),57(CAGCTG,+,0.00),72(CAGCTG,+,0.00),103(CAGCTG,+,0.00)
Merged-chr2-163449488-2	chr2	163449339	163449639	-44(CAGCTG,+,0.00)	-55(CAGGTG,+,0.00),-33(CAGGTG,+,0.00),-22(CAGGTG,+,0.00),-11(CAGGTG,+,0.00),0(CAGGTG,+,0.00),11(CAGGTG,+,0.00),22(CAGGTG,+,0.00),33(CAGGTG,+,0.00)
Merged-chr1-55524158-2	chr1	55524018	55524318	-88(CAGCTG,+,0.00),-75(CAGCTG,+,0.00),-62(CAGCTG,+,0.00),-50(CAGCTG,+,0.00),-25(CAGCTG,+,0.00),0(CAGCTG,+,0.00),13(CAGCTG,+,0.00),26(CAGCTG,+,0.00),38(CAGCTG,+,0.00),51(CAGCTG,+,0.00),64(CAGCTG,+,0.00)
Merged-chr1-170655723-2	chr1	170655577	170655877	-139(CAGCTG,+,0.00),-69(CAGCTG,+,0.00),-37(CAGCTG,+,0.00),0(CAGCTG,+,0.00),55(CAGCTG,+,0.00),65(CAGCTG,+,0.00),113(CAGCTG,+,0.00)		-94(CACCTG,+,0.00),143(CACCTG,+,0.00)
Merged-chr6-97260108-2	chr6	97259956	97260256	-63(CAGCTG,+,0.00),-54(CAGCTG,+,0.00),-45(CAGCTG,+,0.00),-36(CAGCTG,+,0.00),-27(CAGCTG,+,0.00),-18(CAGCTG,+,0.00),-9(CAGCTG,+,0.00),0(CAGCTG,+,0.00),9(CAGCTG,+,0.00),18(CAGCTG,+,0.00),27(CAGCTG,+,0.00),36(CAGCTG,+,0.00),45(CAGCTG,+,0.00),54(CAGCTG,+,0.00)
Merged-chr12-54326751-2	chr12	54326604	54326904	-72(CAGCTG,+,0.00),-48(CAGCTG,+,0.00),-24(CAGCTG,+,0.00),-12(CAGCTG,+,0.00),0(CAGCTG,+,0.00),24(CAGCTG,+,0.00),36(CAGCTG,+,0.00),48(CAGCTG,+,0.00),60(CAGCTG,+,0.00),72(CAGCTG,+,0.00)
Merged-chr4-140575115-2	chr4	140574960	140575260	-67(CAGCTG,+,0.00),-41(CAGCTG,+,0.00),-15(CAGCTG,+,0.00),11(CAGCTG,+,0.00),37(CAGCTG,+,0.00),63(CAGCTG,+,0.00),89(CAGCTG,+,0.00),115(CAGCTG,+,0.00),141(CAGCTG,+,0.00)	-108(CAGGTG,+,0.00),-78(CAGGTG,+,0.00),-52(CAGGTG,+,0.00),-26(CAGGTG,+,0.00),0(CAGGTG,+,0.00),26(CAGGTG,+,0.00),52(CAGGTG,+,0.00),78(CAGGTG,+,0.00),104(CAGGTG,+,0.00),130(CAGGTG,+,0.00)
Merged-chr11-76329019-2	chr11	76328870	76329170	-18(CAGCTG,+,0.00),0(CAGCTG,+,0.00),18(CAGCTG,+,0.00),36(CAGCTG,+,0.00),54(CAGCTG,+,0.00)		-72(CACCTG,+,0.00),-54(CACCTG,+,0.00),-36(CACCTG,+,0.00),108(CACCTG,+,0.00),126(CACCTG,+,0.00),144(CACCTG,+,0.00)
Merged-chr12-105550597-2	chr12	105550456	105550756		-147(CAGGTG,+,0.00),-130(CAGGTG,+,0.00),-94(CAGGTG,+,0.00),-74(CAGGTG,+,0.00),-55(CAGGTG,+,0.00),-38(CAGGTG,+,0.00),-19(CAGGTG,+,0.00),0(CAGGTG,+,0.00),17(CAGGTG,+,0.00),36(CAGGTG,+,0.00),55(CAGGTG,+,0.00),75(CAGGTG,+,0.00),94(CAGGTG,+,0.00)
Merged-chr10-41404420-2	chr10	41404268	41404568	-47(CAGCTG,+,0.00),6(CAGCTG,+,0.00)	-87(CAGGTG,+,0.00),-70(CAGGTG,+,0.00),-53(CAGGTG,+,0.00),-33(CAGGTG,+,0.00),-16(CAGGTG,+,0.00),0(CAGGTG,+,0.00),16(CAGGTG,+,0.00),32(CAGGTG,+,0.00)
Merged-chr9-66658902-2	chr9	66658753	66659053		-58(CAGGTG,+,0.00),-29(CAGGTG,+,0.00),-12(CAGGTG,+,0.00),0(CAGGTG,+,0.00),17(CAGGTG,+,0.00),29(CAGGTG,+,0.00)
Merged-chr6-100320796-2	chr6	100320644	100320944	-110(CAGCTG,+,0.00)	-90(CAGGTG,+,0.00),-75(CAGGTG,+,0.00),-60(CAGGTG,+,0.00),-45(CAGGTG,+,0.00),-30(CAGGTG,+,0.00),-15(CAGGTG,+,0.00),0(CAGGTG,+,0.00),15(CAGGTG,+,0.00),30(CAGGTG,+,0.00),45(CAGGTG,+,0.00),60(CAGGTG,+,0.00),90(CAGGTG,+,0.00),105(CAGGTG,+,0.00)
Merged-chr5-116280590-2	chr5	116280436	116280736	-103(CAGCTG,+,0.00),-52(CAGCTG,+,0.00),0(CAGCTG,+,0.00),19(CAGCTG,+,0.00),129(CAGCTG,+,0.00)	28(CAGGTG,+,0.00)
Merged-chr2-164671141-2	chr2	164670991	164671291	-28(CAGCTG,+,0.00),-16(CAGCTG,+,0.00),0(CAGCTG,+,0.00),12(CAGCTG,+,0.00),28(CAGCTG,+,0.00),40(CAGCTG,+,0.00)	-122(CAGGTG,+,0.00),-103(CAGGTG,+,0.00),-61(CAGGTG,+,0.00),134(CAGGTG,+,0.00)
Merged-chr7-29865378-2	chr7	29865221	29865521		-133(CAGGTG,+,0.00),-114(CAGGTG,+,0.00),-95(CAGGTG,+,0.00),-57(CAGGTG,+,0.00),-19(CAGGTG,+,0.00),0(CAGGTG,+,0.00),19(CAGGTG,+,0.00),38(CAGGTG,+,0.00),57(CAGGTG,+,0.00),76(CAGGTG,+,0.00),114(CAGGTG,+,0.00),133(CAGGTG,+,0.00)
Merged-chr6-55108544-1	chr6	55108401	55108701	68(CAGCTG,+,0.00),92(CAGCTG,+,0.00)	-110(CAGGTG,+,0.00),0(CAGGTG,+,0.00)
Merged-chr15-101494424-2	chr15	101494278	101494578	-92(CAGCTG,+,0.00),-79(CAGCTG,+,0.00),-66(CAGCTG,+,0.00),-13(CAGCTG,+,0.00),0(CAGCTG,+,0.00),13(CAGCTG,+,0.00)		26(CACCTG,+,0.00),39(CACCTG,+,0.00),52(CACCTG,+,0.00),112(CACCTG,+,0.00)
Merged-chr16-91693370-2	chr16	91693217	91693517		-80(CAGGTG,+,0.00),-40(CAGGTG,+,0.00),0(CAGGTG,+,0.00),40(CAGGTG,+,0.00),80(CAGGTG,+,0.00),120(CAGGTG,+,0.00)	-66(CACCTG,+,0.00),-26(CACCTG,+,0.00),14(CACCTG,+,0.00),54(CACCTG,+,0.00),134(CACCTG,+,0.00)
Merged-chr8-121897459-2	chr8	121897317	121897617	-110(CAGCTG,+,0.00)	-104(CAGGTG,+,0.00),-84(CAGGTG,+,0.00),-62(CAGGTG,+,0.00),-42(CAGGTG,+,0.00),-20(CAGGTG,+,0.00),0(CAGGTG,+,0.00),22(CAGGTG,+,0.00)
Merged-chr16-8481851-2	chr16	8481697	8481997		-116(CAGGTG,+,0.00),-106(CAGGTG,+,0.00),-77(CAGGTG,+,0.00),-67(CAGGTG,+,0.00),-58(CAGGTG,+,0.00),-48(CAGGTG,+,0.00),-39(CAGGTG,+,0.00),-19(CAGGTG,+,0.00),-9(CAGGTG,+,0.00),0(CAGGTG,+,0.00),20(CAGGTG,+,0.00),30(CAGGTG,+,0.00),48(CAGGTG,+,0.00),67(CAGGTG,+,0.00),86(CAGGTG,+,0.00),96(CAGGTG,+,0.00),115(CAGGTG,+,0.00),125(CAGGTG,+,0.00),134(CAGGTG,+,0.00)
Merged-chr17-8205368-2	chr17	8205216	8205516	-135(CAGCTG,+,0.00),-114(CAGCTG,+,0.00),-90(CAGCTG,+,0.00),-70(CAGCTG,+,0.00),-49(CAGCTG,+,0.00),-29(CAGCTG,+,0.00),-9(CAGCTG,+,0.00),12(CAGCTG,+,0.00),32(CAGCTG,+,0.00),53(CAGCTG,+,0.00),73(CAGCTG,+,0.00),93(CAGCTG,+,0.00),113(CAGCTG,+,0.00)	-81(CAGGTG,+,0.00),-20(CAGGTG,+,0.00),0(CAGGTG,+,0.00),41(CAGGTG,+,0.00),82(CAGGTG,+,0.00),102(CAGGTG,+,0.00),122(CAGGTG,+,0.00)
Merged-chr4-151325715-2	chr4	151325561	151325861		-135(CAGGTG,+,0.00),-120(CAGGTG,+,0.00),-105(CAGGTG,+,0.00),-75(CAGGTG,+,0.00),-45(CAGGTG,+,0.00),-30(CAGGTG,+,0.00),-15(CAGGTG,+,0.00),0(CAGGTG,+,0.00),30(CAGGTG,+,0.00),45(CAGGTG,+,0.00),60(CAGGTG,+,0.00),75(CAGGTG,+,0.00),90(CAGGTG,+,0.00),120(CAGGTG,+,0.00),135(CAGGTG,+,0.00)
Merged-chr10-44730921-2	chr10	44730770	44731070	0(CAGCTG,+,0.00)	-44(CAGGTG,+,0.00),90(CAGGTG,+,0.00)	-16(CACCTG,+,0.00)
Merged-chr11-8572987-2	chr11	8572840	8573140	-31(CAGCTG,+,0.00)	-18(CAGGTG,+,0.00),0(CAGGTG,+,0.00),12(CAGGTG,+,0.00),24(CAGGTG,+,0.00),36(CAGGTG,+,0.00)
Merged-chr2-168023712-2	chr2	168023565	168023865		-144(CAGGTG,+,0.00),-128(CAGGTG,+,0.00),-112(CAGGTG,+,0.00),-80(CAGGTG,+,0.00),-48(CAGGTG,+,0.00),-32(CAGGTG,+,0.00),-16(CAGGTG,+,0.00),0(CAGGTG,+,0.00),16(CAGGTG,+,0.00),48(CAGGTG,+,0.00),64(CAGGTG,+,0.00),80(CAGGTG,+,0.00),96(CAGGTG,+,0.00),128(CAGGTG,+,0.00),144(CAGGTG,+,0.00)
Merged-chr5-110372237-2	chr5	110372086	110372386		-54(CAGGTG,+,0.00),-39(CAGGTG,+,0.00),-15(CAGGTG,+,0.00),0(CAGGTG,+,0.00),16(CAGGTG,+,0.00),31(CAGGTG,+,0.00),45(CAGGTG,+,0.00),81(CAGGTG,+,0.00)
Merged-chr19-45024826-2	chr19	45024674	45024974	-9(CAGCTG,+,0.00),0(CAGCTG,+,0.00),15(CAGCTG,+,0.00),57(CAGCTG,+,0.00),78(CAGCTG,+,0.00)	6(CAGGTG,+,0.00)
Merged-chr18-24133070-2	chr18	24132913	24133213	-45(CAGCTG,+,0.00),0(CAGCTG,+,0.00),45(CAGCTG,+,0.00),90(CAGCTG,+,0.00)	-60(CAGGTG,+,0.00),-15(CAGGTG,+,0.00),30(CAGGTG,+,0.00),75(CAGGTG,+,0.00)	-32(CACCTG,+,0.00),13(CACCTG,+,0.00),58(CACCTG,+,0.00),103(CACCTG,+,0.00)
Merged-chr2-30779923-2	chr2	30779773	30780073		-28(CAGGTG,+,0.00),-14(CAGGTG,+,0.00),0(CAGGTG,+,0.00),14(CAGGTG,+,0.00),42(CAGGTG,+,0.00)	-141(CACCTG,+,0.00)
Merged-chr2-166389762-2	chr2	166389618	166389918		-136(CAGGTG,+,0.00),-107(CAGGTG,+,0.00),-78(CAGGTG,+,0.00),-58(CAGGTG,+,0.00),-29(CAGGTG,+,0.00),0(CAGGTG,+,0.00),29(CAGGTG,+,0.00),58(CAGGTG,+,0.00),87(CAGGTG,+,0.00),116(CAGGTG,+,0.00)
Merged-chr2-169421552-2	chr2	169421404	169421704	-36(CAGCTG,+,0.00)	-72(CAGGTG,+,0.00),-48(CAGGTG,+,0.00),-24(CAGGTG,+,0.00),-12(CAGGTG,+,0.00),0(CAGGTG,+,0.00),12(CAGGTG,+,0.00),24(CAGGTG,+,0.00),36(CAGGTG,+,0.00),48(CAGGTG,+,0.00),60(CAGGTG,+,0.00),72(CAGGTG,+,0.00),84(CAGGTG,+,0.00),96(CAGGTG,+,0.00),108(CAGGTG,+,0.00),120(CAGGTG,+,0.00),132(CAGGTG,+,0.00),144(CAGGTG,+,0.00)
Merged-chr4-130097355-2	chr4	130097207	130097507		-119(CAGGTG,+,0.00),-97(CAGGTG,+,0.00),-80(CAGGTG,+,0.00),-58(CAGGTG,+,0.00),-16(CAGGTG,+,0.00),0(CAGGTG,+,0.00),17(CAGGTG,+,0.00),40(CAGGTG,+,0.00),53(CAGGTG,+,0.00),71(CAGGTG,+,0.00),85(CAGGTG,+,0.00)
Merged-chr15-76012961-2	chr15	76012812	76013112	-105(CAGCTG,+,0.00),-63(CAGCTG,+,0.00),-48(CAGCTG,+,0.00),-33(CAGCTG,+,0.00),-18(CAGCTG,+,0.00),0(CAGCTG,+,0.00),12(CAGCTG,+,0.00),45(CAGCTG,+,0.00),66(CAGCTG,+,0.00)
Merged-chr8-12519842-2	chr8	12519690	12519990		-84(CAGGTG,+,0.00),-78(CAGGTG,+,0.00),-72(CAGGTG,+,0.00),-66(CAGGTG,+,0.00),-60(CAGGTG,+,0.00),-54(CAGGTG,+,0.00),-48(CAGGTG,+,0.00),-42(CAGGTG,+,0.00),-36(CAGGTG,+,0.00),-30(CAGGTG,+,0.00),-24(CAGGTG,+,0.00),-18(CAGGTG,+,0.00),-12(CAGGTG,+,0.00),-6(CAGGTG,+,0.00),0(CAGGTG,+,0.00),6(CAGGTG,+,0.00)
Merged-chr7-81475579-2	chr7	81475435	81475735	-34(CAGCTG,+,0.00),-17(CAGCTG,+,0.00),0(CAGCTG,+,0.00)		30(CACCTG,+,0.00)
Merged-chr17-87072371-2	chr17	87072220	87072520		-58(CAGGTG,+,0.00),-44(CAGGTG,+,0.00),-14(CAGGTG,+,0.00),0(CAGGTG,+,0.00),14(CAGGTG,+,0.00),28(CAGGTG,+,0.00),42(CAGGTG,+,0.00),56(CAGGTG,+,0.00),70(CAGGTG,+,0.00),84(CAGGTG,+,0.00),98(CAGGTG,+,0.00),112(CAGGTG,+,0.00),126(CAGGTG,+,0.00),140(CAGGTG,+,0.00)
Merged-chr10-42163742-2	chr10	42163594	42163894		-144(CAGGTG,+,0.00),-128(CAGGTG,+,0.00),-120(CAGGTG,+,0.00),-111(CAGGTG,+,0.00),-87(CAGGTG,+,0.00),-72(CAGGTG,+,0.00),-64(CAGGTG,+,0.00),-40(CAGGTG,+,0.00),-32(CAGGTG,+,0.00),-23(CAGGTG,+,0.00),-8(CAGGTG,+,0.00),0(CAGGTG,+,0.00),9(CAGGTG,+,0.00),24(CAGGTG,+,0.00),32(CAGGTG,+,0.00),78(CAGGTG,+,0.00),85(CAGGTG,+,0.00),93(CAGGTG,+,0.00),101(CAGGTG,+,0.00),118(CAGGTG,+,0.00),126(CAGGTG,+,0.00)
Merged-chr2-31870852-2	chr2	31870700	31871000	0(CAGCTG,+,0.00),74(CAGCTG,+,0.00)	-82(CAGGTG,+,0.00),40(CAGGTG,+,0.00)	-37(CACCTG,+,0.00),-17(CACCTG,+,0.00),20(CACCTG,+,0.00),57(CACCTG,+,0.00),143(CACCTG,+,0.00)
Merged-chr1-74424155-2	chr1	74424006	74424306		-143(CAGGTG,+,0.00),-132(CAGGTG,+,0.00),-98(CAGGTG,+,0.00),-66(CAGGTG,+,0.00),-43(CAGGTG,+,0.00),-32(CAGGTG,+,0.00),-11(CAGGTG,+,0.00),0(CAGGTG,+,0.00),34(CAGGTG,+,0.00),66(CAGGTG,+,0.00),100(CAGGTG,+,0.00),132(CAGGTG,+,0.00)
Merged-chr13-100990845-2	chr13	100990700	100991000		-65(CAGGTG,+,0.00),-52(CAGGTG,+,0.00),-39(CAGGTG,+,0.00),-26(CAGGTG,+,0.00),-13(CAGGTG,+,0.00),0(CAGGTG,+,0.00),13(CAGGTG,+,0.00),26(CAGGTG,+,0.00),39(CAGGTG,+,0.00),52(CAGGTG,+,0.00),65(CAGGTG,+,0.00),78(CAGGTG,+,0.00)
Merged-chr7-45226393-2	chr7	45226230	45226530		-39(CAGGTG,+,0.00),-26(CAGGTG,+,0.00),-13(CAGGTG,+,0.00),0(CAGGTG,+,0.00),26(CAGGTG,+,0.00),55(CAGGTG,+,0.00)
Merged-chr15-84657600-2	chr15	84657456	84657756	13(CAGCTG,+,0.00)	-98(CAGGTG,+,0.00),-85(CAGGTG,+,0.00),-58(CAGGTG,+,0.00),-32(CAGGTG,+,0.00),-19(CAGGTG,+,0.00),0(CAGGTG,+,0.00),65(CAGGTG,+,0.00)
Merged-chr10-125906653-2	chr10	125906497	125906797		-130(CAGGTG,+,0.00),-117(CAGGTG,+,0.00),-91(CAGGTG,+,0.00),-65(CAGGTG,+,0.00),-39(CAGGTG,+,0.00),0(CAGGTG,+,0.00),13(CAGGTG,+,0.00),26(CAGGTG,+,0.00),39(CAGGTG,+,0.00),52(CAGGTG,+,0.00),65(CAGGTG,+,0.00),78(CAGGTG,+,0.00),91(CAGGTG,+,0.00)
Merged-chr5-114166444-2	chr5	114166278	114166578		-52(CAGGTG,+,0.00),-39(CAGGTG,+,0.00),0(CAGGTG,+,0.00),13(CAGGTG,+,0.00),26(CAGGTG,+,0.00),39(CAGGTG,+,0.00),65(CAGGTG,+,0.00)
Merged-chr4-134973036-2	chr4	134972881	134973181	-120(CAGCTG,+,0.00),-90(CAGCTG,+,0.00),-60(CAGCTG,+,0.00),-15(CAGCTG,+,0.00),75(CAGCTG,+,0.00),90(CAGCTG,+,0.00),105(CAGCTG,+,0.00),135(CAGCTG,+,0.00)	-135(CAGGTG,+,0.00),-105(CAGGTG,+,0.00),-75(CAGGTG,+,0.00),0(CAGGTG,+,0.00),15(CAGGTG,+,0.00),45(CAGGTG,+,0.00),60(CAGGTG,+,0.00),120(CAGGTG,+,0.00)
Merged-chr5-114333012-2	chr5	114332873	114333173		-141(CAGGTG,+,0.00),-98(CAGGTG,+,0.00),-72(CAGGTG,+,0.00),-34(CAGGTG,+,0.00),-13(CAGGTG,+,0.00),0(CAGGTG,+,0.00),22(CAGGTG,+,0.00),53(CAGGTG,+,0.00),75(CAGGTG,+,0.00),97(CAGGTG,+,0.00)
Merged-chr4-45139957-2	chr4	45139818	45140118		-130(CAGGTG,+,0.00),-97(CAGGTG,+,0.00),-64(CAGGTG,+,0.00),-33(CAGGTG,+,0.00),0(CAGGTG,+,0.00),33(CAGGTG,+,0.00),66(CAGGTG,+,0.00),99(CAGGTG,+,0.00),132(CAGGTG,+,0.00)	-145(CACCTG,+,0.00),-112(CACCTG,+,0.00),-79(CACCTG,+,0.00),-46(CACCTG,+,0.00),-15(CACCTG,+,0.00),18(CACCTG,+,0.00),84(CACCTG,+,0.00),117(CACCTG,+,0.00)
Merged-chr12-112206806-2	chr12	112206647	112206947		-133(CAGGTG,+,0.00),-126(CAGGTG,+,0.00),-119(CAGGTG,+,0.00),-112(CAGGTG,+,0.00),-70(CAGGTG,+,0.00),-63(CAGGTG,+,0.00),-49(CAGGTG,+,0.00),-42(CAGGTG,+,0.00),-35(CAGGTG,+,0.00),-14(CAGGTG,+,0.00),0(CAGGTG,+,0.00),28(CAGGTG,+,0.00),55(CAGGTG,+,0.00),62(CAGGTG,+,0.00),83(CAGGTG,+,0.00),96(CAGGTG,+,0.00),110(CAGGTG,+,0.00),124(CAGGTG,+,0.00)
Merged-chr12-29130310-2	chr12	29130157	29130457		-123(CAGGTG,+,0.00),-104(CAGGTG,+,0.00),-73(CAGGTG,+,0.00),-50(CAGGTG,+,0.00),-19(CAGGTG,+,0.00),0(CAGGTG,+,0.00),31(CAGGTG,+,0.00),54(CAGGTG,+,0.00),73(CAGGTG,+,0.00),111(CAGGTG,+,0.00),142(CAGGTG,+,0.00)
Merged-chr4-153567885-2	chr4	153567729	153568029		-111(CAGGTG,+,0.00),-80(CAGGTG,+,0.00),-61(CAGGTG,+,0.00),-40(CAGGTG,+,0.00),-21(CAGGTG,+,0.00),0(CAGGTG,+,0.00),21(CAGGTG,+,0.00),42(CAGGTG,+,0.00),63(CAGGTG,+,0.00),84(CAGGTG,+,0.00),104(CAGGTG,+,0.00),125(CAGGTG,+,0.00),144(CAGGTG,+,0.00)
Merged-chr17-49717826-2	chr17	49717681	49717981		-144(CAGGTG,+,0.00),-138(CAGGTG,+,0.00),-128(CAGGTG,+,0.00),-112(CAGGTG,+,0.00),-106(CAGGTG,+,0.00),-96(CAGGTG,+,0.00),-80(CAGGTG,+,0.00),-64(CAGGTG,+,0.00),-42(CAGGTG,+,0.00),-32(CAGGTG,+,0.00),-26(CAGGTG,+,0.00),-16(CAGGTG,+,0.00),-10(CAGGTG,+,0.00),0(CAGGTG,+,0.00),16(CAGGTG,+,0.00),22(CAGGTG,+,0.00),32(CAGGTG,+,0.00),38(CAGGTG,+,0.00),44(CAGGTG,+,0.00),54(CAGGTG,+,0.00),70(CAGGTG,+,0.00),86(C…
Merged-chr15-76976815-2	chr15	76976664	76976964	0(CAGCTG,+,0.00),44(CAGCTG,+,0.00)
Merged-chr4-48036121-2	chr4	48035976	48036276		-149(CAGGTG,+,0.00),-129(CAGGTG,+,0.00),-107(CAGGTG,+,0.00),-86(CAGGTG,+,0.00),-64(CAGGTG,+,0.00),-42(CAGGTG,+,0.00),-22(CAGGTG,+,0.00),0(CAGGTG,+,0.00),22(CAGGTG,+,0.00),42(CAGGTG,+,0.00),64(CAGGTG,+,0.00),86(CAGGTG,+,0.00),108(CAGGTG,+,0.00),128(CAGGTG,+,0.00)
Merged-chr2-152117315-2	chr2	152117165	152117465	-41(CAGCTG,+,0.00)	-13(CAGGTG,+,0.00),0(CAGGTG,+,0.00),13(CAGGTG,+,0.00),27(CAGGTG,+,0.00),40(CAGGTG,+,0.00),68(CAGGTG,+,0.00),82(CAGGTG,+,0.00),97(CAGGTG,+,0.00),112(CAGGTG,+,0.00)	-95(CACCTG,+,0.00)
Merged-chr16-91693771-2	chr16	91693617	91693917	14(CAGCTG,+,0.00)	-120(CAGGTG,+,0.00),-40(CAGGTG,+,0.00),0(CAGGTG,+,0.00)	-146(CACCTG,+,0.00),-106(CACCTG,+,0.00),-66(CACCTG,+,0.00),-26(CACCTG,+,0.00)
Merged-chr7-141111031-2	chr7	141110879	141111179		-114(CAGGTG,+,0.00),-95(CAGGTG,+,0.00),-76(CAGGTG,+,0.00),-57(CAGGTG,+,0.00),-38(CAGGTG,+,0.00),-19(CAGGTG,+,0.00),0(CAGGTG,+,0.00),23(CAGGTG,+,0.00),46(CAGGTG,+,0.00),65(CAGGTG,+,0.00),88(CAGGTG,+,0.00)
Merged-chr4-131283904-2	chr4	131283771	131284071	22(CAGCTG,+,0.00)	-70(CAGGTG,+,0.00),-43(CAGGTG,+,0.00),0(CAGGTG,+,0.00)
Merged-chr2-165239705-1	chr2	165239567	165239867		0(CAGGTG,+,0.00)
Merged-chr15-96604493-2	chr15	96604338	96604638	-53(CAGCTG,+,0.00),-41(CAGCTG,+,0.00),0(CAGCTG,+,0.00),79(CAGCTG,+,0.00)
Merged-chr14-121543047-2	chr14	121542897	121543197		-119(CAGGTG,+,0.00),-90(CAGGTG,+,0.00),-60(CAGGTG,+,0.00),-30(CAGGTG,+,0.00),0(CAGGTG,+,0.00),30(CAGGTG,+,0.00),51(CAGGTG,+,0.00),74(CAGGTG,+,0.00),120(CAGGTG,+,0.00)	-69(CACCTG,+,0.00),-39(CACCTG,+,0.00),-9(CACCTG,+,0.00),21(CACCTG,+,0.00),42(CACCTG,+,0.00),65(CACCTG,+,0.00),88(CACCTG,+,0.00),111(CACCTG,+,0.00)
Merged-chr15-99236285-2	chr15	99236137	99236437	-82(CAGCTG,+,0.00),-47(CAGCTG,+,0.00),-12(CAGCTG,+,0.00),23(CAGCTG,+,0.00),78(CAGCTG,+,0.00)	-70(CAGGTG,+,0.00),-35(CAGGTG,+,0.00),0(CAGGTG,+,0.00),35(CAGGTG,+,0.00)	-94(CACCTG,+,0.00),-59(CACCTG,+,0.00),-24(CACCTG,+,0.00),11(CACCTG,+,0.00)
Merged-chr15-78486763-2	chr15	78486612	78486912	-118(CAGCTG,+,0.00)	-92(CAGGTG,+,0.00),-69(CAGGTG,+,0.00),-46(CAGGTG,+,0.00),-23(CAGGTG,+,0.00),0(CAGGTG,+,0.00),23(CAGGTG,+,0.00),43(CAGGTG,+,0.00),63(CAGGTG,+,0.00),80(CAGGTG,+,0.00),103(CAGGTG,+,0.00),123(CAGGTG,+,0.00)
Merged-chr19-46518208-2	chr19	46518060	46518360	-23(CAGCTG,+,0.00),0(CAGCTG,+,0.00),18(CAGCTG,+,0.00),73(CAGCTG,+,0.00)
Merged-chr9-61128238-2	chr9	61128088	61128388		-96(CAGGTG,+,0.00),-84(CAGGTG,+,0.00),-48(CAGGTG,+,0.00),-36(CAGGTG,+,0.00),-24(CAGGTG,+,0.00),0(CAGGTG,+,0.00),12(CAGGTG,+,0.00),24(CAGGTG,+,0.00)
Merged-chr12-51166193-2	chr12	51166044	51166344		-13(CAGGTG,+,0.00),0(CAGGTG,+,0.00),6(CAGGTG,+,0.00),12(CAGGTG,+,0.00),23(CAGGTG,+,0.00)
Merged-chr11-35610281-2	chr11	35610134	35610434		-30(CAGGTG,+,0.00),-18(CAGGTG,+,0.00),-12(CAGGTG,+,0.00),0(CAGGTG,+,0.00),6(CAGGTG,+,0.00),18(CAGGTG,+,0.00),24(CAGGTG,+,0.00),36(CAGGTG,+,0.00),42(CAGGTG,+,0.00),54(CAGGTG,+,0.00),60(CAGGTG,+,0.00),72(CAGGTG,+,0.00),78(CAGGTG,+,0.00),90(CAGGTG,+,0.00)
Merged-chr2-157027436-2	chr2	157027281	157027581	-75(CAGCTG,+,0.00),-69(CAGCTG,+,0.00),-33(CAGCTG,+,0.00)	0(CAGGTG,+,0.00),12(CAGGTG,+,0.00),42(CAGGTG,+,0.00)
Merged-chr4-120071795-2	chr4	120071649	120071949	-87(CAGCTG,+,0.00),0(CAGCTG,+,0.00)	-41(CAGGTG,+,0.00),-13(CAGGTG,+,0.00)
Merged-chr17-8347083-2	chr17	8346931	8347231	-150(CAGCTG,+,0.00),-135(CAGCTG,+,0.00),-120(CAGCTG,+,0.00),-105(CAGCTG,+,0.00),-90(CAGCTG,+,0.00),-75(CAGCTG,+,0.00),-60(CAGCTG,+,0.00),-30(CAGCTG,+,0.00),-15(CAGCTG,+,0.00),0(CAGCTG,+,0.00),15(CAGCTG,+,0.00),30(CAGCTG,+,0.00),45(CAGCTG,+,0.00),60(CAGCTG,+,0.00),75(CAGCTG,+,0.00),105(CAGCTG,+,0.00),120(CAGCTG,+,0.00),135(CAGCTG,+,0.00)	-45(CAGGTG,+,0.00),90(CAGGTG,+,0.00)
Merged-chr1-154759104-2	chr1	154758951	154759251		-144(CAGGTG,+,0.00),-128(CAGGTG,+,0.00),-112(CAGGTG,+,0.00),-96(CAGGTG,+,0.00),-64(CAGGTG,+,0.00),-48(CAGGTG,+,0.00),-32(CAGGTG,+,0.00),-16(CAGGTG,+,0.00),0(CAGGTG,+,0.00),16(CAGGTG,+,0.00),32(CAGGTG,+,0.00),48(CAGGTG,+,0.00),64(CAGGTG,+,0.00),80(CAGGTG,+,0.00),96(CAGGTG,+,0.00),112(CAGGTG,+,0.00),128(CAGGTG,+,0.00),144(CAGGTG,+,0.00)
Merged-chr1-43136712-2	chr1	43136564	43136864	-148(CAGCTG,+,0.00),-129(CAGCTG,+,0.00),-110(CAGCTG,+,0.00),-91(CAGCTG,+,0.00),-73(CAGCTG,+,0.00),-55(CAGCTG,+,0.00),-36(CAGCTG,+,0.00),-18(CAGCTG,+,0.00),0(CAGCTG,+,0.00),19(CAGCTG,+,0.00),37(CAGCTG,+,0.00),56(CAGCTG,+,0.00),75(CAGCTG,+,0.00),93(CAGCTG,+,0.00),112(CAGCTG,+,0.00)
Merged-chr3-136699878-2	chr3	136699732	136700032		-108(CAGGTG,+,0.00),-95(CAGGTG,+,0.00),-82(CAGGTG,+,0.00),-69(CAGGTG,+,0.00),-55(CAGGTG,+,0.00),-42(CAGGTG,+,0.00),-28(CAGGTG,+,0.00),-14(CAGGTG,+,0.00),0(CAGGTG,+,0.00),14(CAGGTG,+,0.00),27(CAGGTG,+,0.00),41(CAGGTG,+,0.00),54(CAGGTG,+,0.00),67(CAGGTG,+,0.00),80(CAGGTG,+,0.00)
Merged-chr9-62676033-2	chr9	62675891	62676191		-144(CAGGTG,+,0.00),-128(CAGGTG,+,0.00),-112(CAGGTG,+,0.00),-96(CAGGTG,+,0.00),-80(CAGGTG,+,0.00),-64(CAGGTG,+,0.00),-48(CAGGTG,+,0.00),-32(CAGGTG,+,0.00),-16(CAGGTG,+,0.00),0(CAGGTG,+,0.00),16(CAGGTG,+,0.00),48(CAGGTG,+,0.00),64(CAGGTG,+,0.00),80(CAGGTG,+,0.00),96(CAGGTG,+,0.00),112(CAGGTG,+,0.00)
Merged-chr11-99658716-2	chr11	99658571	99658871	-150(CAGCTG,+,0.00),-135(CAGCTG,+,0.00),-105(CAGCTG,+,0.00),-90(CAGCTG,+,0.00),-75(CAGCTG,+,0.00),-15(CAGCTG,+,0.00),0(CAGCTG,+,0.00),15(CAGCTG,+,0.00),75(CAGCTG,+,0.00),90(CAGCTG,+,0.00),135(CAGCTG,+,0.00)	-60(CAGGTG,+,0.00),105(CAGGTG,+,0.00),120(CAGGTG,+,0.00)
Merged-chr11-70724534-2	chr11	70724380	70724680		-64(CAGGTG,+,0.00),-32(CAGGTG,+,0.00),0(CAGGTG,+,0.00),32(CAGGTG,+,0.00),64(CAGGTG,+,0.00),96(CAGGTG,+,0.00),128(CAGGTG,+,0.00)	-44(CACCTG,+,0.00),-12(CACCTG,+,0.00),20(CACCTG,+,0.00),52(CACCTG,+,0.00),84(CACCTG,+,0.00),116(CACCTG,+,0.00)
Merged-chr8-111452134-2	chr8	111451977	111452277		-68(CAGGTG,+,0.00),-17(CAGGTG,+,0.00),0(CAGGTG,+,0.00),17(CAGGTG,+,0.00),34(CAGGTG,+,0.00),68(CAGGTG,+,0.00),85(CAGGTG,+,0.00)
Merged-chr3-37966372-2	chr3	37966226	37966526	-120(CAGCTG,+,0.00),-88(CAGCTG,+,0.00),-16(CAGCTG,+,0.00),24(CAGCTG,+,0.00),48(CAGCTG,+,0.00),72(CAGCTG,+,0.00),104(CAGCTG,+,0.00),112(CAGCTG,+,0.00),136(CAGCTG,+,0.00)	-144(CAGGTG,+,0.00),-128(CAGGTG,+,0.00),-112(CAGGTG,+,0.00),-96(CAGGTG,+,0.00),-80(CAGGTG,+,0.00),-56(CAGGTG,+,0.00),-40(CAGGTG,+,0.00),-24(CAGGTG,+,0.00),-8(CAGGTG,+,0.00),0(CAGGTG,+,0.00),8(CAGGTG,+,0.00),32(CAGGTG,+,0.00),56(CAGGTG,+,0.00),80(CAGGTG,+,0.00),96(CAGGTG,+,0.00),120(CAGGTG,+,0.00)
Merged-chr17-25109519-2	chr17	25109370	25109670		-31(CAGGTG,+,0.00),-25(CAGGTG,+,0.00),-19(CAGGTG,+,0.00),0(CAGGTG,+,0.00),6(CAGGTG,+,0.00),12(CAGGTG,+,0.00),30(CAGGTG,+,0.00),36(CAGGTG,+,0.00)
Merged-chr11-99665628-2	chr11	99665474	99665774	-150(CAGCTG,+,0.00),-90(CAGCTG,+,0.00),-75(CAGCTG,+,0.00),-30(CAGCTG,+,0.00),0(CAGCTG,+,0.00),15(CAGCTG,+,0.00),45(CAGCTG,+,0.00),60(CAGCTG,+,0.00),90(CAGCTG,+,0.00),105(CAGCTG,+,0.00),135(CAGCTG,+,0.00)		-105(CACCTG,+,0.00),-60(CACCTG,+,0.00),-45(CACCTG,+,0.00),-15(CACCTG,+,0.00),30(CACCTG,+,0.00)
Merged-chr2-180761893-2	chr2	180761742	180762042		-140(CAGGTG,+,0.00),-125(CAGGTG,+,0.00),-109(CAGGTG,+,0.00),-94(CAGGTG,+,0.00),-63(CAGGTG,+,0.00),-47(CAGGTG,+,0.00),-31(CAGGTG,+,0.00),-16(CAGGTG,+,0.00),0(CAGGTG,+,0.00),68(CAGGTG,+,0.00),84(CAGGTG,+,0.00),99(CAGGTG,+,0.00),115(CAGGTG,+,0.00),130(CAGGTG,+,0.00)
Merged-chr5-111753744-2	chr5	111753600	111753900		-39(CAGGTG,+,0.00),-12(CAGGTG,+,0.00),0(CAGGTG,+,0.00),12(CAGGTG,+,0.00),24(CAGGTG,+,0.00),36(CAGGTG,+,0.00),48(CAGGTG,+,0.00),60(CAGGTG,+,0.00),72(CAGGTG,+,0.00),84(CAGGTG,+,0.00),96(CAGGTG,+,0.00),108(CAGGTG,+,0.00)
Merged-chr11-52479682-2	chr11	52479527	52479827	0(CAGCTG,+,0.00)	-120(CAGGTG,+,0.00),-84(CAGGTG,+,0.00),-72(CAGGTG,+,0.00),-12(CAGGTG,+,0.00),36(CAGGTG,+,0.00),99(CAGGTG,+,0.00),108(CAGGTG,+,0.00)	-60(CACCTG,+,0.00)
Merged-chr12-102344725-2	chr12	102344571	102344871		-140(CAGGTG,+,0.00),-126(CAGGTG,+,0.00),-112(CAGGTG,+,0.00),-98(CAGGTG,+,0.00),-84(CAGGTG,+,0.00),-70(CAGGTG,+,0.00),-56(CAGGTG,+,0.00),-42(CAGGTG,+,0.00),-28(CAGGTG,+,0.00),-14(CAGGTG,+,0.00),0(CAGGTG,+,0.00),14(CAGGTG,+,0.00),28(CAGGTG,+,0.00),42(CAGGTG,+,0.00),56(CAGGTG,+,0.00),70(CAGGTG,+,0.00),84(CAGGTG,+,0.00)
Merged-chr6-117765972-2	chr6	117765826	117766126		-48(CAGGTG,+,0.00),-36(CAGGTG,+,0.00),-12(CAGGTG,+,0.00),0(CAGGTG,+,0.00),12(CAGGTG,+,0.00),24(CAGGTG,+,0.00),36(CAGGTG,+,0.00),48(CAGGTG,+,0.00),75(CAGGTG,+,0.00),132(CAGGTG,+,0.00)
Merged-chr11-99583393-2	chr11	99583243	99583543	-60(CAGCTG,+,0.00),-45(CAGCTG,+,0.00),-30(CAGCTG,+,0.00),0(CAGCTG,+,0.00),30(CAGCTG,+,0.00),60(CAGCTG,+,0.00),90(CAGCTG,+,0.00),120(CAGCTG,+,0.00),135(CAGCTG,+,0.00)	-15(CAGGTG,+,0.00),15(CAGGTG,+,0.00),45(CAGGTG,+,0.00),75(CAGGTG,+,0.00),105(CAGGTG,+,0.00)
Merged-chr11-71513115-2	chr11	71512978	71513278		-60(CAGGTG,+,0.00),-42(CAGGTG,+,0.00),0(CAGGTG,+,0.00),21(CAGGTG,+,0.00)
Merged-chr2-75750537-2	chr2	75750391	75750691		-26(CAGGTG,+,0.00),-13(CAGGTG,+,0.00),0(CAGGTG,+,0.00),26(CAGGTG,+,0.00),52(CAGGTG,+,0.00),65(CAGGTG,+,0.00)
Merged-chr7-117278512-2	chr7	117278359	117278659	-24(CAGCTG,+,0.00),-13(CAGCTG,+,0.00),100(CAGCTG,+,0.00)	0(CAGGTG,+,0.00)	51(CACCTG,+,0.00)
Merged-chr10-61366094-2	chr10	61365958	61366258	0(CAGCTG,+,0.00)
Merged-chr10-85328150-2	chr10	85328002	85328302		-52(CAGGTG,+,0.00),-39(CAGGTG,+,0.00),-26(CAGGTG,+,0.00),-13(CAGGTG,+,0.00),0(CAGGTG,+,0.00),25(CAGGTG,+,0.00),38(CAGGTG,+,0.00),51(CAGGTG,+,0.00),64(CAGGTG,+,0.00),77(CAGGTG,+,0.00)
Merged-chr2-165693135-2	chr2	165692990	165693290		-61(CAGGTG,+,0.00),-46(CAGGTG,+,0.00),-30(CAGGTG,+,0.00),-15(CAGGTG,+,0.00),0(CAGGTG,+,0.00),15(CAGGTG,+,0.00),30(CAGGTG,+,0.00),75(CAGGTG,+,0.00),125(CAGGTG,+,0.00)
Merged-chr11-99851362-2	chr11	99851220	99851520	-114(CAGCTG,+,0.00),-99(CAGCTG,+,0.00),-57(CAGCTG,+,0.00),-42(CAGCTG,+,0.00),27(CAGCTG,+,0.00),42(CAGCTG,+,0.00),102(CAGCTG,+,0.00),117(CAGCTG,+,0.00)	-144(CAGGTG,+,0.00),-87(CAGGTG,+,0.00),-30(CAGGTG,+,0.00),0(CAGGTG,+,0.00),12(CAGGTG,+,0.00)
Merged-chr18-81669278-2	chr18	81669123	81669423		-125(CAGGTG,+,0.00),-102(CAGGTG,+,0.00),-91(CAGGTG,+,0.00),-68(CAGGTG,+,0.00),-34(CAGGTG,+,0.00),-23(CAGGTG,+,0.00),0(CAGGTG,+,0.00),11(CAGGTG,+,0.00),34(CAGGTG,+,0.00),45(CAGGTG,+,0.00),68(CAGGTG,+,0.00),102(CAGGTG,+,0.00),113(CAGGTG,+,0.00),136(CAGGTG,+,0.00)
Merged-chr8-92011192-2	chr8	92011045	92011345		-36(CAGGTG,+,0.00),-30(CAGGTG,+,0.00),-24(CAGGTG,+,0.00),-18(CAGGTG,+,0.00),-12(CAGGTG,+,0.00),-6(CAGGTG,+,0.00),0(CAGGTG,+,0.00),6(CAGGTG,+,0.00),12(CAGGTG,+,0.00),18(CAGGTG,+,0.00),24(CAGGTG,+,0.00)
Merged-chr8-84351147-2	chr8	84350999	84351299	-115(CAGCTG,+,0.00),0(CAGCTG,+,0.00),60(CAGCTG,+,0.00)	-19(CAGGTG,+,0.00)	-38(CACCTG,+,0.00)
Merged-chr2-165900428-2	chr2	165900281	165900581	0(CAGCTG,+,0.00)
Merged-chr8-123524012-2	chr8	123523861	123524161		-64(CAGGTG,+,0.00),-32(CAGGTG,+,0.00),0(CAGGTG,+,0.00),32(CAGGTG,+,0.00)	88(CACCTG,+,0.00)
Merged-chr2-167090863-2	chr2	167090708	167091008		-84(CAGGTG,+,0.00),-65(CAGGTG,+,0.00),-42(CAGGTG,+,0.00),-21(CAGGTG,+,0.00),0(CAGGTG,+,0.00),19(CAGGTG,+,0.00),40(CAGGTG,+,0.00),63(CAGGTG,+,0.00),84(CAGGTG,+,0.00),109(CAGGTG,+,0.00),128(CAGGTG,+,0.00)
Merged-chr14-33535518-1	chr14	33535366	33535666	0(CAGCTG,+,0.00),52(CAGCTG,+,0.00)		-43(CACCTG,+,0.00),-21(CACCTG,+,0.00)
Merged-chr9-41333349-2	chr9	41333204	41333504		-44(CAGGTG,+,0.00),-33(CAGGTG,+,0.00),-22(CAGGTG,+,0.00),-11(CAGGTG,+,0.00),0(CAGGTG,+,0.00),11(CAGGTG,+,0.00),22(CAGGTG,+,0.00),33(CAGGTG,+,0.00),44(CAGGTG,+,0.00),55(CAGGTG,+,0.00)
Merged-chr9-57402506-2	chr9	57402357	57402657	-39(CAGCTG,+,0.00),0(CAGCTG,+,0.00)		-50(CACCTG,+,0.00),17(CACCTG,+,0.00)
Merged-chr7-28505784-1	chr7	28505645	28505945	0(CAGCTG,+,0.00)
Merged-chr2-168423344-2	chr2	168423187	168423487		-112(CAGGTG,+,0.00),-96(CAGGTG,+,0.00),-80(CAGGTG,+,0.00),-64(CAGGTG,+,0.00),-48(CAGGTG,+,0.00),-32(CAGGTG,+,0.00),-16(CAGGTG,+,0.00),0(CAGGTG,+,0.00),16(CAGGTG,+,0.00),32(CAGGTG,+,0.00),48(CAGGTG,+,0.00),64(CAGGTG,+,0.00),80(CAGGTG,+,0.00),96(CAGGTG,+,0.00),112(CAGGTG,+,0.00),128(CAGGTG,+,0.00)
Merged-chr10-40465830-2	chr10	40465674	40465974		-148(CAGGTG,+,0.00),-62(CAGGTG,+,0.00),-50(CAGGTG,+,0.00),-20(CAGGTG,+,0.00),0(CAGGTG,+,0.00),20(CAGGTG,+,0.00),32(CAGGTG,+,0.00),62(CAGGTG,+,0.00),74(CAGGTG,+,0.00),104(CAGGTG,+,0.00),116(CAGGTG,+,0.00),124(CAGGTG,+,0.00),136(CAGGTG,+,0.00)
Merged-chr14-31571610-2	chr14	31571454	31571754	-102(CAGCTG,+,0.00)	-22(CAGGTG,+,0.00),-11(CAGGTG,+,0.00),0(CAGGTG,+,0.00),22(CAGGTG,+,0.00),33(CAGGTG,+,0.00),44(CAGGTG,+,0.00),55(CAGGTG,+,0.00)
Merged-chr15-77793286-2	chr15	77793134	77793434		-64(CAGGTG,+,0.00),-48(CAGGTG,+,0.00),-32(CAGGTG,+,0.00),-16(CAGGTG,+,0.00),0(CAGGTG,+,0.00),16(CAGGTG,+,0.00),32(CAGGTG,+,0.00),99(CAGGTG,+,0.00)
Merged-chr8-70533374-2	chr8	70533214	70533514		-140(CAGGTG,+,0.00),-120(CAGGTG,+,0.00),-100(CAGGTG,+,0.00),-80(CAGGTG,+,0.00),-60(CAGGTG,+,0.00),-40(CAGGTG,+,0.00),-20(CAGGTG,+,0.00),0(CAGGTG,+,0.00),20(CAGGTG,+,0.00),40(CAGGTG,+,0.00),80(CAGGTG,+,0.00),100(CAGGTG,+,0.00),120(CAGGTG,+,0.00),140(CAGGTG,+,0.00)
Merged-chr12-111136168-2	chr12	111136012	111136312	-90(CAGCTG,+,0.00),-76(CAGCTG,+,0.00),-45(CAGCTG,+,0.00),-30(CAGCTG,+,0.00),-15(CAGCTG,+,0.00),15(CAGCTG,+,0.00)	0(CAGGTG,+,0.00)
Merged-chr14-114959862-2	chr14	114959707	114960007	-147(CAGCTG,+,0.00),-135(CAGCTG,+,0.00),-114(CAGCTG,+,0.00),-84(CAGCTG,+,0.00),-30(CAGCTG,+,0.00),0(CAGCTG,+,0.00),21(CAGCTG,+,0.00),51(CAGCTG,+,0.00),60(CAGCTG,+,0.00),81(CAGCTG,+,0.00)
Merged-chr9-115537357-2	chr9	115537226	115537526	-82(CAGCTG,+,0.00),51(CAGCTG,+,0.00)	0(CAGGTG,+,0.00),40(CAGGTG,+,0.00),67(CAGGTG,+,0.00)
Merged-chr17-88707997-2	chr17	88707846	88708146	-24(CAGCTG,+,0.00),24(CAGCTG,+,0.00)	-77(CAGGTG,+,0.00),0(CAGGTG,+,0.00),44(CAGGTG,+,0.00)	-13(CACCTG,+,0.00),11(CACCTG,+,0.00),35(CACCTG,+,0.00)
Merged-chr6-88886576-2	chr6	88886415	88886715	-61(CAGCTG,+,0.00)	0(CAGGTG,+,0.00),57(CAGGTG,+,0.00),125(CAGGTG,+,0.00)
Merged-chr7-142229514-2	chr7	142229364	142229664	-144(CAGCTG,+,0.00),-114(CAGCTG,+,0.00),-84(CAGCTG,+,0.00),-30(CAGCTG,+,0.00),0(CAGCTG,+,0.00),54(CAGCTG,+,0.00),84(CAGCTG,+,0.00),99(CAGCTG,+,0.00)
Merged-chr11-22372962-2	chr11	22372808	22373108	-132(CAGCTG,+,0.00),-108(CAGCTG,+,0.00),-59(CAGCTG,+,0.00),-13(CAGCTG,+,0.00),11(CAGCTG,+,0.00),36(CAGCTG,+,0.00),83(CAGCTG,+,0.00)	-35(CAGGTG,+,0.00),-24(CAGGTG,+,0.00),0(CAGGTG,+,0.00),61(CAGGTG,+,0.00),72(CAGGTG,+,0.00)
Merged-chr19-22887217-2	chr19	22887064	22887364		-140(CAGGTG,+,0.00),-104(CAGGTG,+,0.00),-68(CAGGTG,+,0.00),-32(CAGGTG,+,0.00),0(CAGGTG,+,0.00),32(CAGGTG,+,0.00),68(CAGGTG,+,0.00),104(CAGGTG,+,0.00),140(CAGGTG,+,0.00)	-129(CACCTG,+,0.00),-93(CACCTG,+,0.00),-21(CACCTG,+,0.00),11(CACCTG,+,0.00),79(CACCTG,+,0.00),115(CACCTG,+,0.00)
Merged-chr6-5819838-2	chr6	5819690	5819990	0(CAGCTG,+,0.00),26(CAGCTG,+,0.00)		-14(CACCTG,+,0.00),12(CACCTG,+,0.00),38(CACCTG,+,0.00)
Merged-chr1-89998878-2	chr1	89998727	89999027	-26(CAGCTG,+,0.00),-13(CAGCTG,+,0.00),0(CAGCTG,+,0.00),13(CAGCTG,+,0.00)	-39(CAGGTG,+,0.00)
Merged-chr9-120292020-2	chr9	120291871	120292171		-60(CAGGTG,+,0.00),-54(CAGGTG,+,0.00),-48(CAGGTG,+,0.00),-42(CAGGTG,+,0.00),-36(CAGGTG,+,0.00),-30(CAGGTG,+,0.00),-24(CAGGTG,+,0.00),-18(CAGGTG,+,0.00),-12(CAGGTG,+,0.00),-6(CAGGTG,+,0.00),0(CAGGTG,+,0.00),6(CAGGTG,+,0.00),12(CAGGTG,+,0.00),18(CAGGTG,+,0.00),24(CAGGTG,+,0.00),30(CAGGTG,+,0.00),36(CAGGTG,+,0.00),48(CAGGTG,+,0.00),102(CAGGTG,+,0.00)
Merged-chr17-36355546-2	chr17	36355389	36355689	-87(CAGCTG,+,0.00),50(CAGCTG,+,0.00)	0(CAGGTG,+,0.00),118(CAGGTG,+,0.00)
Merged-chr12-99067426-2	chr12	99067278	99067578	-150(CAGCTG,+,0.00),-120(CAGCTG,+,0.00),-90(CAGCTG,+,0.00),-60(CAGCTG,+,0.00),-30(CAGCTG,+,0.00),0(CAGCTG,+,0.00)	-138(CAGGTG,+,0.00),-108(CAGGTG,+,0.00),-78(CAGGTG,+,0.00),-48(CAGGTG,+,0.00),-18(CAGGTG,+,0.00),12(CAGGTG,+,0.00)
Merged-chr14-79639477-2	chr14	79639336	79639636		-117(CAGGTG,+,0.00),-60(CAGGTG,+,0.00),-48(CAGGTG,+,0.00),-36(CAGGTG,+,0.00),-12(CAGGTG,+,0.00),0(CAGGTG,+,0.00),24(CAGGTG,+,0.00),36(CAGGTG,+,0.00),48(CAGGTG,+,0.00)
Merged-chr18-81401511-2	chr18	81401375	81401675	98(CAGCTG,+,0.00)	-123(CAGGTG,+,0.00),-114(CAGGTG,+,0.00),-90(CAGGTG,+,0.00),-75(CAGGTG,+,0.00),-66(CAGGTG,+,0.00),-57(CAGGTG,+,0.00),-48(CAGGTG,+,0.00),-39(CAGGTG,+,0.00),0(CAGGTG,+,0.00),15(CAGGTG,+,0.00),24(CAGGTG,+,0.00),30(CAGGTG,+,0.00),39(CAGGTG,+,0.00),45(CAGGTG,+,0.00)
Merged-chr2-18893560-2	chr2	18893412	18893712		-138(CAGGTG,+,0.00),-117(CAGGTG,+,0.00),-78(CAGGTG,+,0.00),-60(CAGGTG,+,0.00),-39(CAGGTG,+,0.00),-21(CAGGTG,+,0.00),0(CAGGTG,+,0.00),18(CAGGTG,+,0.00),36(CAGGTG,+,0.00),54(CAGGTG,+,0.00),72(CAGGTG,+,0.00),90(CAGGTG,+,0.00),108(CAGGTG,+,0.00),126(CAGGTG,+,0.00)
Merged-chr11-119282724-2	chr11	119282571	119282871	-147(CAGCTG,+,0.00),-103(CAGCTG,+,0.00),-59(CAGCTG,+,0.00),-15(CAGCTG,+,0.00),30(CAGCTG,+,0.00),74(CAGCTG,+,0.00),118(CAGCTG,+,0.00)	-133(CAGGTG,+,0.00),-89(CAGGTG,+,0.00),-45(CAGGTG,+,0.00),0(CAGGTG,+,0.00),44(CAGGTG,+,0.00),88(CAGGTG,+,0.00),132(CAGGTG,+,0.00)
Merged-chr6-118431674-2	chr6	118431521	118431821	-95(CAGCTG,+,0.00),-80(CAGCTG,+,0.00),-65(CAGCTG,+,0.00),-52(CAGCTG,+,0.00),-39(CAGCTG,+,0.00),-26(CAGCTG,+,0.00),-13(CAGCTG,+,0.00),0(CAGCTG,+,0.00)
Merged-chr11-60161486-2	chr11	60161344	60161644	-41(CAGCTG,+,0.00),0(CAGCTG,+,0.00),28(CAGCTG,+,0.00)		-65(CACCTG,+,0.00),-57(CACCTG,+,0.00)
Merged-chr2-25797733-2	chr2	25797582	25797882	-16(CAGCTG,+,0.00),0(CAGCTG,+,0.00),16(CAGCTG,+,0.00),32(CAGCTG,+,0.00),48(CAGCTG,+,0.00)		-29(CACCTG,+,0.00)
Merged-chr2-105258638-2	chr2	105258482	105258782		-131(CAGGTG,+,0.00),-117(CAGGTG,+,0.00),-92(CAGGTG,+,0.00),-78(CAGGTG,+,0.00),-53(CAGGTG,+,0.00),-39(CAGGTG,+,0.00),0(CAGGTG,+,0.00),25(CAGGTG,+,0.00),39(CAGGTG,+,0.00),64(CAGGTG,+,0.00),78(CAGGTG,+,0.00),103(CAGGTG,+,0.00),117(CAGGTG,+,0.00),142(CAGGTG,+,0.00)
Merged-chr5-101925952-2	chr5	101925821	101926121		-88(CAGGTG,+,0.00),-44(CAGGTG,+,0.00),-22(CAGGTG,+,0.00),0(CAGGTG,+,0.00),44(CAGGTG,+,0.00),72(CAGGTG,+,0.00),89(CAGGTG,+,0.00),111(CAGGTG,+,0.00),139(CAGGTG,+,0.00)
Merged-chr11-99948882-2	chr11	99948731	99949031	-144(CAGCTG,+,0.00),-72(CAGCTG,+,0.00),-57(CAGCTG,+,0.00),0(CAGCTG,+,0.00),33(CAGCTG,+,0.00)	-87(CAGGTG,+,0.00),-27(CAGGTG,+,0.00),-12(CAGGTG,+,0.00),60(CAGGTG,+,0.00),123(CAGGTG,+,0.00),138(CAGGTG,+,0.00)
Merged-chr8-108744254-2	chr8	108744083	108744383		-39(CAGGTG,+,0.00),-26(CAGGTG,+,0.00),-13(CAGGTG,+,0.00),0(CAGGTG,+,0.00)
Merged-chr8-13503477-2	chr8	13503334	13503634		-128(CAGGTG,+,0.00),-112(CAGGTG,+,0.00),-96(CAGGTG,+,0.00),-80(CAGGTG,+,0.00),-64(CAGGTG,+,0.00),-48(CAGGTG,+,0.00),-32(CAGGTG,+,0.00),-16(CAGGTG,+,0.00),0(CAGGTG,+,0.00),16(CAGGTG,+,0.00),32(CAGGTG,+,0.00),48(CAGGTG,+,0.00),64(CAGGTG,+,0.00),96(CAGGTG,+,0.00),112(CAGGTG,+,0.00),128(CAGGTG,+,0.00),144(CAGGTG,+,0.00)
Merged-chr16-93309158-2	chr16	93309004	93309304		-134(CAGGTG,+,0.00),-116(CAGGTG,+,0.00),-98(CAGGTG,+,0.00),-80(CAGGTG,+,0.00),-65(CAGGTG,+,0.00),-47(CAGGTG,+,0.00),-40(CAGGTG,+,0.00),-22(CAGGTG,+,0.00),-15(CAGGTG,+,0.00),0(CAGGTG,+,0.00),18(CAGGTG,+,0.00),36(CAGGTG,+,0.00),54(CAGGTG,+,0.00),87(CAGGTG,+,0.00),120(CAGGTG,+,0.00)
Merged-chr12-111696385-2	chr12	111696236	111696536	-55(CAGCTG,+,0.00),-13(CAGCTG,+,0.00)	0(CAGGTG,+,0.00)	-22(CACCTG,+,0.00),16(CACCTG,+,0.00)
Merged-chr6-135294761-2	chr6	135294610	135294910		-78(CAGGTG,+,0.00),-39(CAGGTG,+,0.00),-26(CAGGTG,+,0.00),-13(CAGGTG,+,0.00),0(CAGGTG,+,0.00),13(CAGGTG,+,0.00),52(CAGGTG,+,0.00),65(CAGGTG,+,0.00),78(CAGGTG,+,0.00),91(CAGGTG,+,0.00)
Merged-chr10-10458170-2	chr10	10458019	10458319		-42(CAGGTG,+,0.00),-21(CAGGTG,+,0.00),0(CAGGTG,+,0.00),21(CAGGTG,+,0.00),42(CAGGTG,+,0.00),63(CAGGTG,+,0.00)
Merged-chr10-90904311-2	chr10	90904167	90904467		-62(CAGGTG,+,0.00),-46(CAGGTG,+,0.00),-32(CAGGTG,+,0.00),-16(CAGGTG,+,0.00),0(CAGGTG,+,0.00),16(CAGGTG,+,0.00),30(CAGGTG,+,0.00),46(CAGGTG,+,0.00),60(CAGGTG,+,0.00),74(CAGGTG,+,0.00),88(CAGGTG,+,0.00),104(CAGGTG,+,0.00)
Merged-chr3-86993269-2	chr3	86993120	86993420		-120(CAGGTG,+,0.00),-105(CAGGTG,+,0.00),-90(CAGGTG,+,0.00),-75(CAGGTG,+,0.00),-60(CAGGTG,+,0.00),-45(CAGGTG,+,0.00),-30(CAGGTG,+,0.00),-15(CAGGTG,+,0.00),0(CAGGTG,+,0.00),15(CAGGTG,+,0.00),30(CAGGTG,+,0.00),45(CAGGTG,+,0.00),60(CAGGTG,+,0.00),75(CAGGTG,+,0.00),90(CAGGTG,+,0.00),105(CAGGTG,+,0.00),120(CAGGTG,+,0.00),135(CAGGTG,+,0.00)
Merged-chr5-26413165-2	chr5	26413021	26413321	-15(CAGCTG,+,0.00),12(CAGCTG,+,0.00),39(CAGCTG,+,0.00),66(CAGCTG,+,0.00)	-27(CAGGTG,+,0.00),0(CAGGTG,+,0.00),27(CAGGTG,+,0.00),54(CAGGTG,+,0.00),81(CAGGTG,+,0.00)
Merged-chr11-69459996-2	chr11	69459850	69460150	-80(CAGCTG,+,0.00),-64(CAGCTG,+,0.00),-48(CAGCTG,+,0.00),-32(CAGCTG,+,0.00),0(CAGCTG,+,0.00),16(CAGCTG,+,0.00),32(CAGCTG,+,0.00),48(CAGCTG,+,0.00),64(CAGCTG,+,0.00),80(CAGCTG,+,0.00),96(CAGCTG,+,0.00),112(CAGCTG,+,0.00),128(CAGCTG,+,0.00),144(CAGCTG,+,0.00)
Merged-chr16-13429069-2	chr16	13428907	13429207	-116(CAGCTG,+,0.00),-97(CAGCTG,+,0.00),-85(CAGCTG,+,0.00),-66(CAGCTG,+,0.00),-54(CAGCTG,+,0.00),-31(CAGCTG,+,0.00),0(CAGCTG,+,0.00),12(CAGCTG,+,0.00),31(CAGCTG,+,0.00),44(CAGCTG,+,0.00),65(CAGCTG,+,0.00),76(CAGCTG,+,0.00),101(CAGCTG,+,0.00),133(CAGCTG,+,0.00)		120(CACCTG,+,0.00)
Merged-chr11-108119928-2	chr11	108119764	108120064	-144(CAGCTG,+,0.00)	0(CAGGTG,+,0.00),32(CAGGTG,+,0.00),64(CAGGTG,+,0.00),96(CAGGTG,+,0.00),128(CAGGTG,+,0.00)	23(CACCTG,+,0.00),55(CACCTG,+,0.00),87(CACCTG,+,0.00),119(CACCTG,+,0.00)
Merged-chr3-58872016-2	chr3	58871864	58872164	-76(CAGCTG,+,0.00),-64(CAGCTG,+,0.00),-44(CAGCTG,+,0.00),-32(CAGCTG,+,0.00),-12(CAGCTG,+,0.00),0(CAGCTG,+,0.00),20(CAGCTG,+,0.00),32(CAGCTG,+,0.00),52(CAGCTG,+,0.00),64(CAGCTG,+,0.00),119(CAGCTG,+,0.00)	-114(CAGGTG,+,0.00)	70(CACCTG,+,0.00)
Merged-chr8-84039571-2	chr8	84039417	84039717	53(CAGCTG,+,0.00),65(CAGCTG,+,0.00)	0(CAGGTG,+,0.00)	-28(CACCTG,+,0.00),-10(CACCTG,+,0.00)
Merged-chr17-46093345-2	chr17	46093202	46093502		-60(CAGGTG,+,0.00),-42(CAGGTG,+,0.00),-30(CAGGTG,+,0.00),-12(CAGGTG,+,0.00),0(CAGGTG,+,0.00),17(CAGGTG,+,0.00),46(CAGGTG,+,0.00),58(CAGGTG,+,0.00),76(CAGGTG,+,0.00),88(CAGGTG,+,0.00),118(CAGGTG,+,0.00)
Merged-chr2-135887979-2	chr2	135887831	135888131		-72(CAGGTG,+,0.00),-60(CAGGTG,+,0.00),-48(CAGGTG,+,0.00),-36(CAGGTG,+,0.00),-24(CAGGTG,+,0.00),-12(CAGGTG,+,0.00),0(CAGGTG,+,0.00),19(CAGGTG,+,0.00)
Merged-chr8-27204451-1	chr8	27204300	27204600		-24(CAGGTG,+,0.00),-12(CAGGTG,+,0.00),0(CAGGTG,+,0.00),6(CAGGTG,+,0.00),18(CAGGTG,+,0.00),30(CAGGTG,+,0.00),42(CAGGTG,+,0.00),66(CAGGTG,+,0.00),84(CAGGTG,+,0.00),90(CAGGTG,+,0.00)
Merged-chr19-31461209-2	chr19	31461065	31461365		-144(CAGGTG,+,0.00),-112(CAGGTG,+,0.00),-64(CAGGTG,+,0.00),-32(CAGGTG,+,0.00),0(CAGGTG,+,0.00),16(CAGGTG,+,0.00),32(CAGGTG,+,0.00),48(CAGGTG,+,0.00),80(CAGGTG,+,0.00),96(CAGGTG,+,0.00),112(CAGGTG,+,0.00),128(CAGGTG,+,0.00)
Merged-chr3-101818714-2	chr3	101818581	101818881	-51(CAGCTG,+,0.00),0(CAGCTG,+,0.00),39(CAGCTG,+,0.00)	-105(CAGGTG,+,0.00)	-111(CACCTG,+,0.00),15(CACCTG,+,0.00)
Merged-chr7-19951990-2	chr7	19951840	19952140	-14(CAGCTG,+,0.00),0(CAGCTG,+,0.00),14(CAGCTG,+,0.00),56(CAGCTG,+,0.00),70(CAGCTG,+,0.00),84(CAGCTG,+,0.00),140(CAGCTG,+,0.00)	-110(CAGGTG,+,0.00)	-117(CACCTG,+,0.00)
Merged-chr2-166888017-2	chr2	166887869	166888169	-37(CAGCTG,+,0.00),0(CAGCTG,+,0.00)
Merged-chr10-72588760-2	chr10	72588616	72588916		-50(CAGGTG,+,0.00),-38(CAGGTG,+,0.00),-19(CAGGTG,+,0.00),0(CAGGTG,+,0.00),12(CAGGTG,+,0.00),31(CAGGTG,+,0.00)
Merged-chr17-23722918-2	chr17	23722762	23723062	-68(CAGCTG,+,0.00),-49(CAGCTG,+,0.00),0(CAGCTG,+,0.00)	28(CAGGTG,+,0.00)
Merged-chr4-154183169-2	chr4	154183019	154183319	-47(CAGCTG,+,0.00)	-11(CAGGTG,+,0.00),0(CAGGTG,+,0.00),16(CAGGTG,+,0.00),27(CAGGTG,+,0.00),43(CAGGTG,+,0.00),54(CAGGTG,+,0.00),70(CAGGTG,+,0.00),81(CAGGTG,+,0.00),104(CAGGTG,+,0.00),120(CAGGTG,+,0.00),131(CAGGTG,+,0.00)
Merged-chr13-51378423-2	chr13	51378282	51378582	-133(CAGCTG,+,0.00),-84(CAGCTG,+,0.00),0(CAGCTG,+,0.00)		-25(CACCTG,+,0.00)
Merged-chr10-77130239-2	chr10	77130076	77130376	-35(CAGCTG,+,0.00),-12(CAGCTG,+,0.00)	0(CAGGTG,+,0.00)	-63(CACCTG,+,0.00),-42(CACCTG,+,0.00)
Merged-chr4-49838049-2	chr4	49837902	49838202	-62(CAGCTG,+,0.00)	-123(CAGGTG,+,0.00),-31(CAGGTG,+,0.00),0(CAGGTG,+,0.00),115(CAGGTG,+,0.00)
Merged-chr11-60722840-2	chr11	60722694	60722994	117(CAGCTG,+,0.00)	-131(CAGGTG,+,0.00),-112(CAGGTG,+,0.00),-93(CAGGTG,+,0.00),-81(CAGGTG,+,0.00),-62(CAGGTG,+,0.00),-50(CAGGTG,+,0.00),-31(CAGGTG,+,0.00),-19(CAGGTG,+,0.00),0(CAGGTG,+,0.00),12(CAGGTG,+,0.00),31(CAGGTG,+,0.00),50(CAGGTG,+,0.00)
Merged-chr16-20522641-2	chr16	20522484	20522784	-130(CAGCTG,+,0.00),-118(CAGCTG,+,0.00),-97(CAGCTG,+,0.00),-65(CAGCTG,+,0.00),-32(CAGCTG,+,0.00),0(CAGCTG,+,0.00),33(CAGCTG,+,0.00),45(CAGCTG,+,0.00),66(CAGCTG,+,0.00),78(CAGCTG,+,0.00),99(CAGCTG,+,0.00),131(CAGCTG,+,0.00)
Merged-chr10-111191235-2	chr10	111191083	111191383		0(CAGGTG,+,0.00),16(CAGGTG,+,0.00),32(CAGGTG,+,0.00),48(CAGGTG,+,0.00),64(CAGGTG,+,0.00),80(CAGGTG,+,0.00),96(CAGGTG,+,0.00),112(CAGGTG,+,0.00)
Merged-chr11-118348600-1	chr11	118348446	118348746	-17(CAGCTG,+,0.00)	-61(CAGGTG,+,0.00),0(CAGGTG,+,0.00)
Merged-chr4-138883871-2	chr4	138883724	138884024	-122(CAGCTG,+,0.00)	-60(CAGGTG,+,0.00),-48(CAGGTG,+,0.00),-36(CAGGTG,+,0.00),-24(CAGGTG,+,0.00),-12(CAGGTG,+,0.00),0(CAGGTG,+,0.00),12(CAGGTG,+,0.00),24(CAGGTG,+,0.00),36(CAGGTG,+,0.00),48(CAGGTG,+,0.00),60(CAGGTG,+,0.00),72(CAGGTG,+,0.00),96(CAGGTG,+,0.00),120(CAGGTG,+,0.00)
Merged-chr11-99634856-2	chr11	99634717	99635017	-120(CAGCTG,+,0.00),-90(CAGCTG,+,0.00),-75(CAGCTG,+,0.00),0(CAGCTG,+,0.00),15(CAGCTG,+,0.00),30(CAGCTG,+,0.00),45(CAGCTG,+,0.00),90(CAGCTG,+,0.00)	60(CAGGTG,+,0.00),75(CAGGTG,+,0.00)
Merged-chr16-30051061-2	chr16	30050899	30051199	0(CAGCTG,+,0.00),43(CAGCTG,+,0.00)	-50(CAGGTG,+,0.00),-38(CAGGTG,+,0.00)	29(CACCTG,+,0.00),51(CACCTG,+,0.00)
Merged-chr7-132431366-2	chr7	132431226	132431526	-145(CAGCTG,+,0.00),-87(CAGCTG,+,0.00),-58(CAGCTG,+,0.00),-29(CAGCTG,+,0.00),0(CAGCTG,+,0.00),29(CAGCTG,+,0.00),58(CAGCTG,+,0.00),87(CAGCTG,+,0.00),116(CAGCTG,+,0.00)
Merged-chr5-143288577-1	chr5	143288409	143288709	-45(CAGCTG,+,0.00),-27(CAGCTG,+,0.00),-18(CAGCTG,+,0.00),45(CAGCTG,+,0.00)	-66(CAGGTG,+,0.00),0(CAGGTG,+,0.00)
Merged-chr1-171126073-2	chr1	171125915	171126215	-62(CAGCTG,+,0.00)	-26(CAGGTG,+,0.00),0(CAGGTG,+,0.00)	140(CACCTG,+,0.00)
Merged-chr8-106964612-2	chr8	106964474	106964774	0(CAGCTG,+,0.00)		-52(CACCTG,+,0.00)
Merged-chr15-96297286-2	chr15	96297136	96297436	-140(CAGCTG,+,0.00)	-15(CAGGTG,+,0.00),0(CAGGTG,+,0.00)
Merged-chr11-82882846-2	chr11	82882697	82882997	0(CAGCTG,+,0.00)		-110(CACCTG,+,0.00),-29(CACCTG,+,0.00),37(CACCTG,+,0.00),109(CACCTG,+,0.00)
Merged-chr11-99591206-2	chr11	99591044	99591344	-60(CAGCTG,+,0.00),-45(CAGCTG,+,0.00),-30(CAGCTG,+,0.00),0(CAGCTG,+,0.00),15(CAGCTG,+,0.00),30(CAGCTG,+,0.00),45(CAGCTG,+,0.00),90(CAGCTG,+,0.00),105(CAGCTG,+,0.00),120(CAGCTG,+,0.00)		-72(CACCTG,+,0.00)
Merged-chr16-9030166-2	chr16	9030031	9030331		-22(CAGGTG,+,0.00),-11(CAGGTG,+,0.00),0(CAGGTG,+,0.00)	-42(CACCTG,+,0.00)
Merged-chr11-85969554-2	chr11	85969400	85969700		-66(CAGGTG,+,0.00),-33(CAGGTG,+,0.00),0(CAGGTG,+,0.00)	-51(CACCTG,+,0.00),-18(CACCTG,+,0.00)
Merged-chr10-123032337-2	chr10	123032181	123032481	0(CAGCTG,+,0.00),14(CAGCTG,+,0.00),28(CAGCTG,+,0.00),42(CAGCTG,+,0.00),56(CAGCTG,+,0.00)		88(CACCTG,+,0.00)
Merged-chr11-99815138-2	chr11	99814989	99815289	-75(CAGCTG,+,0.00),-30(CAGCTG,+,0.00),0(CAGCTG,+,0.00),33(CAGCTG,+,0.00),78(CAGCTG,+,0.00),123(CAGCTG,+,0.00),138(CAGCTG,+,0.00)	-105(CAGGTG,+,0.00),-90(CAGGTG,+,0.00)
Merged-chr4-142383466-2	chr4	142383309	142383609	115(CAGCTG,+,0.00),126(CAGCTG,+,0.00)	-149(CAGGTG,+,0.00),-132(CAGGTG,+,0.00),-116(CAGGTG,+,0.00),-83(CAGGTG,+,0.00),-67(CAGGTG,+,0.00),-50(CAGGTG,+,0.00),-33(CAGGTG,+,0.00),-17(CAGGTG,+,0.00),0(CAGGTG,+,0.00),17(CAGGTG,+,0.00),34(CAGGTG,+,0.00),50(CAGGTG,+,0.00)
Merged-chr11-101601087-2	chr11	101600943	101601243	-145(CAGCTG,+,0.00)	-98(CAGGTG,+,0.00),-62(CAGGTG,+,0.00),-50(CAGGTG,+,0.00),-38(CAGGTG,+,0.00),-26(CAGGTG,+,0.00),-12(CAGGTG,+,0.00),0(CAGGTG,+,0.00),12(CAGGTG,+,0.00),24(CAGGTG,+,0.00),36(CAGGTG,+,0.00)
Merged-chr19-38060294-2	chr19	38060143	38060443	0(CAGCTG,+,0.00),84(CAGCTG,+,0.00)	-57(CAGGTG,+,0.00)	-66(CACCTG,+,0.00)
Merged-chr13-57949672-1	chr13	57949526	57949826		-67(CAGGTG,+,0.00),-54(CAGGTG,+,0.00),-42(CAGGTG,+,0.00),-25(CAGGTG,+,0.00),-12(CAGGTG,+,0.00),0(CAGGTG,+,0.00),17(CAGGTG,+,0.00),30(CAGGTG,+,0.00),42(CAGGTG,+,0.00)
Merged-chr12-111021326-2	chr12	111021177	111021477	-48(CAGCTG,+,0.00),-33(CAGCTG,+,0.00),0(CAGCTG,+,0.00)	18(CAGGTG,+,0.00)
Merged-chr2-164821258-2	chr2	164821100	164821400	0(CAGCTG,+,0.00),47(CAGCTG,+,0.00)	83(CAGGTG,+,0.00)	26(CACCTG,+,0.00)
Merged-chr1-120211005-2	chr1	120210858	120211158	-25(CAGCTG,+,0.00),11(CAGCTG,+,0.00),43(CAGCTG,+,0.00),79(CAGCTG,+,0.00)	-36(CAGGTG,+,0.00),0(CAGGTG,+,0.00),32(CAGGTG,+,0.00),68(CAGGTG,+,0.00)	-42(CACCTG,+,0.00),26(CACCTG,+,0.00)
Merged-chr11-82902111-2	chr11	82901955	82902255	-45(CAGCTG,+,0.00),78(CAGCTG,+,0.00)	0(CAGGTG,+,0.00)	-52(CACCTG,+,0.00),-39(CACCTG,+,0.00)
Merged-chr17-34388168-2	chr17	34388025	34388325		-80(CAGGTG,+,0.00),-64(CAGGTG,+,0.00),-48(CAGGTG,+,0.00),-32(CAGGTG,+,0.00),-16(CAGGTG,+,0.00),0(CAGGTG,+,0.00),16(CAGGTG,+,0.00),32(CAGGTG,+,0.00),48(CAGGTG,+,0.00),64(CAGGTG,+,0.00),80(CAGGTG,+,0.00)	-92(CACCTG,+,0.00),125(CACCTG,+,0.00)
Merged-chr4-34239800-2	chr4	34239649	34239949	-8(CAGCTG,+,0.00),0(CAGCTG,+,0.00),33(CAGCTG,+,0.00)	20(CAGGTG,+,0.00)
Merged-chr11-99949318-2	chr11	99949185	99949485	-129(CAGCTG,+,0.00),-114(CAGCTG,+,0.00),-57(CAGCTG,+,0.00),-42(CAGCTG,+,0.00),0(CAGCTG,+,0.00),30(CAGCTG,+,0.00),87(CAGCTG,+,0.00),102(CAGCTG,+,0.00)		-99(CACCTG,+,0.00),-84(CACCTG,+,0.00),45(CACCTG,+,0.00),60(CACCTG,+,0.00),117(CACCTG,+,0.00),132(CACCTG,+,0.00)
Merged-chr13-40669974-2	chr13	40669818	40670118		-111(CAGGTG,+,0.00),-95(CAGGTG,+,0.00),-79(CAGGTG,+,0.00),-63(CAGGTG,+,0.00),-47(CAGGTG,+,0.00),-31(CAGGTG,+,0.00),0(CAGGTG,+,0.00),111(CAGGTG,+,0.00)
Merged-chr9-58521496-2	chr9	58521332	58521632		-29(CAGGTG,+,0.00),0(CAGGTG,+,0.00)	-107(CACCTG,+,0.00)
Merged-chr4-140049401-2	chr4	140049254	140049554		-150(CAGGTG,+,0.00),-126(CAGGTG,+,0.00),-63(CAGGTG,+,0.00),-50(CAGGTG,+,0.00),-38(CAGGTG,+,0.00),-13(CAGGTG,+,0.00),0(CAGGTG,+,0.00),6(CAGGTG,+,0.00),18(CAGGTG,+,0.00),43(CAGGTG,+,0.00),56(CAGGTG,+,0.00),62(CAGGTG,+,0.00),74(CAGGTG,+,0.00)
Merged-chr9-64497505-2	chr9	64497362	64497662	123(CAGCTG,+,0.00)	-75(CAGGTG,+,0.00),-66(CAGGTG,+,0.00),-42(CAGGTG,+,0.00),-33(CAGGTG,+,0.00),-9(CAGGTG,+,0.00),0(CAGGTG,+,0.00),24(CAGGTG,+,0.00),33(CAGGTG,+,0.00),57(CAGGTG,+,0.00),66(CAGGTG,+,0.00),90(CAGGTG,+,0.00),99(CAGGTG,+,0.00)
Merged-chr9-61366388-2	chr9	61366255	61366555		-53(CAGGTG,+,0.00),0(CAGGTG,+,0.00)	-21(CACCTG,+,0.00),35(CACCTG,+,0.00)
Merged-chr2-31869890-2	chr2	31869734	31870034	128(CAGCTG,+,0.00)	-137(CAGGTG,+,0.00),-120(CAGGTG,+,0.00),-80(CAGGTG,+,0.00),-60(CAGGTG,+,0.00),-40(CAGGTG,+,0.00),-20(CAGGTG,+,0.00),0(CAGGTG,+,0.00),20(CAGGTG,+,0.00),37(CAGGTG,+,0.00),54(CAGGTG,+,0.00),74(CAGGTG,+,0.00)
Merged-chr17-75463542-2	chr17	75463398	75463698		-80(CAGGTG,+,0.00),-60(CAGGTG,+,0.00),-40(CAGGTG,+,0.00),0(CAGGTG,+,0.00),20(CAGGTG,+,0.00),40(CAGGTG,+,0.00),59(CAGGTG,+,0.00),84(CAGGTG,+,0.00)	140(CACCTG,+,0.00)
Merged-chr3-57535917-2	chr3	57535770	57536070	0(CAGCTG,+,0.00),72(CAGCTG,+,0.00)	-18(CAGGTG,+,0.00)
Merged-chr4-133896615-2	chr4	133896475	133896775		0(CAGGTG,+,0.00),11(CAGGTG,+,0.00),22(CAGGTG,+,0.00),33(CAGGTG,+,0.00),55(CAGGTG,+,0.00)
Merged-chr11-59640411-2	chr11	59640249	59640549		-134(CAGGTG,+,0.00),-115(CAGGTG,+,0.00),-95(CAGGTG,+,0.00),-76(CAGGTG,+,0.00),-57(CAGGTG,+,0.00),-38(CAGGTG,+,0.00),0(CAGGTG,+,0.00),19(CAGGTG,+,0.00),38(CAGGTG,+,0.00),57(CAGGTG,+,0.00),76(CAGGTG,+,0.00)
Merged-chr11-99858262-2	chr11	99858113	99858413	-135(CAGCTG,+,0.00),-105(CAGCTG,+,0.00),-75(CAGCTG,+,0.00),-60(CAGCTG,+,0.00),-45(CAGCTG,+,0.00),-30(CAGCTG,+,0.00),-15(CAGCTG,+,0.00),0(CAGCTG,+,0.00),15(CAGCTG,+,0.00),42(CAGCTG,+,0.00),87(CAGCTG,+,0.00)	126(CAGGTG,+,0.00)	-120(CACCTG,+,0.00),-90(CACCTG,+,0.00)
Merged-chr18-46879157-2	chr18	46879019	46879319		-126(CAGGTG,+,0.00),-103(CAGGTG,+,0.00),-80(CAGGTG,+,0.00),-64(CAGGTG,+,0.00),-46(CAGGTG,+,0.00),-32(CAGGTG,+,0.00),0(CAGGTG,+,0.00),23(CAGGTG,+,0.00),39(CAGGTG,+,0.00),55(CAGGTG,+,0.00),78(CAGGTG,+,0.00),94(CAGGTG,+,0.00),110(CAGGTG,+,0.00)
Merged-chr11-99809703-2	chr11	99809551	99809851	-150(CAGCTG,+,0.00),-135(CAGCTG,+,0.00),-120(CAGCTG,+,0.00),-105(CAGCTG,+,0.00),-30(CAGCTG,+,0.00),-15(CAGCTG,+,0.00),0(CAGCTG,+,0.00),15(CAGCTG,+,0.00),30(CAGCTG,+,0.00),60(CAGCTG,+,0.00)	45(CAGGTG,+,0.00)
Merged-chr11-49728108-2	chr11	49727956	49728256	0(CAGCTG,+,0.00)	-40(CAGGTG,+,0.00)
Merged-chr17-31789166-1	chr17	31789020	31789320	-22(CAGCTG,+,0.00),0(CAGCTG,+,0.00)	-83(CAGGTG,+,0.00)
Merged-chr4-127107026-2	chr4	127106863	127107163	-59(CAGCTG,+,0.00)	0(CAGGTG,+,0.00),14(CAGGTG,+,0.00)
Merged-chr15-34877175-2	chr15	34877025	34877325		-28(CAGGTG,+,0.00),-14(CAGGTG,+,0.00),0(CAGGTG,+,0.00),14(CAGGTG,+,0.00),28(CAGGTG,+,0.00),42(CAGGTG,+,0.00),56(CAGGTG,+,0.00)
Merged-chr11-100728757-2	chr11	100728609	100728909	0(CAGCTG,+,0.00)	-72(CAGGTG,+,0.00)
Merged-chr5-149757308-2	chr5	149757152	149757452		-150(CAGGTG,+,0.00),-135(CAGGTG,+,0.00),-105(CAGGTG,+,0.00),-90(CAGGTG,+,0.00),-75(CAGGTG,+,0.00),-45(CAGGTG,+,0.00),-30(CAGGTG,+,0.00),-15(CAGGTG,+,0.00),0(CAGGTG,+,0.00),15(CAGGTG,+,0.00),30(CAGGTG,+,0.00),45(CAGGTG,+,0.00),60(CAGGTG,+,0.00),75(CAGGTG,+,0.00),105(CAGGTG,+,0.00),128(CAGGTG,+,0.00)
Merged-chr11-51176203-2	chr11	51176066	51176366		-117(CAGGTG,+,0.00),-81(CAGGTG,+,0.00),-72(CAGGTG,+,0.00),0(CAGGTG,+,0.00),63(CAGGTG,+,0.00),75(CAGGTG,+,0.00)
Merged-chr6-34942630-2	chr6	34942482	34942782	0(CAGCTG,+,0.00),72(CAGCTG,+,0.00)	25(CAGGTG,+,0.00)
Merged-chr11-55264500-2	chr11	55264352	55264652		-83(CAGGTG,+,0.00),-74(CAGGTG,+,0.00),-61(CAGGTG,+,0.00),-52(CAGGTG,+,0.00),-27(CAGGTG,+,0.00),-18(CAGGTG,+,0.00),-9(CAGGTG,+,0.00),0(CAGGTG,+,0.00),22(CAGGTG,+,0.00),31(CAGGTG,+,0.00),40(CAGGTG,+,0.00)
Merged-chr12-28972186-2	chr12	28972037	28972337		0(CAGGTG,+,0.00),128(CAGGTG,+,0.00)	-94(CACCTG,+,0.00),-38(CACCTG,+,0.00)
Merged-chr7-19084528-2	chr7	19084387	19084687	-48(CAGCTG,+,0.00),0(CAGCTG,+,0.00)	-23(CAGGTG,+,0.00),12(CAGGTG,+,0.00)
Merged-chr10-127276457-2	chr10	127276312	127276612	-21(CAGCTG,+,0.00),0(CAGCTG,+,0.00)		15(CACCTG,+,0.00)
Merged-chr19-46373858-2	chr19	46373711	46374011	-54(CAGCTG,+,0.00),-45(CAGCTG,+,0.00),-27(CAGCTG,+,0.00),-18(CAGCTG,+,0.00),0(CAGCTG,+,0.00),18(CAGCTG,+,0.00),36(CAGCTG,+,0.00)
Merged-chr12-104534755-2	chr12	104534621	104534921	42(CAGCTG,+,0.00)	-62(CAGGTG,+,0.00),-56(CAGGTG,+,0.00),0(CAGGTG,+,0.00),28(CAGGTG,+,0.00)	-68(CACCTG,+,0.00),-40(CACCTG,+,0.00),16(CACCTG,+,0.00)
Merged-chr5-105001281-2	chr5	105001114	105001414		-149(CAGGTG,+,0.00),-119(CAGGTG,+,0.00),-90(CAGGTG,+,0.00),-60(CAGGTG,+,0.00),0(CAGGTG,+,0.00),30(CAGGTG,+,0.00),45(CAGGTG,+,0.00),60(CAGGTG,+,0.00),75(CAGGTG,+,0.00),90(CAGGTG,+,0.00),105(CAGGTG,+,0.00),135(CAGGTG,+,0.00)
Merged-chr1-127819925-2	chr1	127819778	127820078	0(CAGCTG,+,0.00)		-48(CACCTG,+,0.00)
Merged-chr11-78696051-2	chr11	78695900	78696200	-138(CAGCTG,+,0.00),-21(CAGCTG,+,0.00),0(CAGCTG,+,0.00)
Merged-chr6-115717398-2	chr6	115717246	115717546	-59(CAGCTG,+,0.00),-31(CAGCTG,+,0.00),0(CAGCTG,+,0.00),81(CAGCTG,+,0.00)		98(CACCTG,+,0.00)
Merged-chr10-77690597-1	chr10	77690450	77690750	-102(CAGCTG,+,0.00),-87(CAGCTG,+,0.00),-57(CAGCTG,+,0.00),-42(CAGCTG,+,0.00),-27(CAGCTG,+,0.00),0(CAGCTG,+,0.00)		53(CACCTG,+,0.00)
Merged-chr17-34067854-2	chr17	34067700	34068000		-143(CAGGTG,+,0.00),-126(CAGGTG,+,0.00),-106(CAGGTG,+,0.00),-89(CAGGTG,+,0.00),-69(CAGGTG,+,0.00),-52(CAGGTG,+,0.00),-35(CAGGTG,+,0.00),-17(CAGGTG,+,0.00),0(CAGGTG,+,0.00),20(CAGGTG,+,0.00),37(CAGGTG,+,0.00),107(CAGGTG,+,0.00),124(CAGGTG,+,0.00),144(CAGGTG,+,0.00)
Merged-chr11-5840480-2	chr11	5840316	5840616		-93(CAGGTG,+,0.00),-53(CAGGTG,+,0.00),0(CAGGTG,+,0.00),26(CAGGTG,+,0.00)
Merged-chr16-22216425-1	chr16	22216274	22216574		-73(CAGGTG,+,0.00),-23(CAGGTG,+,0.00),0(CAGGTG,+,0.00),23(CAGGTG,+,0.00),69(CAGGTG,+,0.00)
Merged-chr6-39494339-2	chr6	39494196	39494496		-132(CAGGTG,+,0.00),-99(CAGGTG,+,0.00),-66(CAGGTG,+,0.00),-33(CAGGTG,+,0.00),0(CAGGTG,+,0.00),33(CAGGTG,+,0.00),66(CAGGTG,+,0.00),132(CAGGTG,+,0.00)
Merged-chr7-43777976-2	chr7	43777831	43778131		-44(CAGGTG,+,0.00),-33(CAGGTG,+,0.00),-22(CAGGTG,+,0.00),-11(CAGGTG,+,0.00),0(CAGGTG,+,0.00),11(CAGGTG,+,0.00),22(CAGGTG,+,0.00),33(CAGGTG,+,0.00),44(CAGGTG,+,0.00),91(CAGGTG,+,0.00)
Merged-chr15-36507974-1	chr15	36507823	36508123	65(CAGCTG,+,0.00)	-65(CAGGTG,+,0.00),-38(CAGGTG,+,0.00),-19(CAGGTG,+,0.00),0(CAGGTG,+,0.00),19(CAGGTG,+,0.00),57(CAGGTG,+,0.00),76(CAGGTG,+,0.00)
Merged-chr11-101497212-2	chr11	101497054	101497354	0(CAGCTG,+,0.00)	71(CAGGTG,+,0.00)	-22(CACCTG,+,0.00)
Merged-chrX-103763315-2	chrX	103763182	103763482	24(CAGCTG,+,0.00)	0(CAGGTG,+,0.00),48(CAGGTG,+,0.00)	103(CACCTG,+,0.00),139(CACCTG,+,0.00)
Merged-chr2-128911956-2	chr2	128911808	128912108	-58(CAGCTG,+,0.00),-29(CAGCTG,+,0.00),0(CAGCTG,+,0.00),29(CAGCTG,+,0.00),58(CAGCTG,+,0.00),87(CAGCTG,+,0.00)	-120(CAGGTG,+,0.00),-87(CAGGTG,+,0.00),116(CAGGTG,+,0.00),145(CAGGTG,+,0.00)
Merged-chr8-93897045-2	chr8	93896898	93897198	-54(CAGCTG,+,0.00),-36(CAGCTG,+,0.00),-18(CAGCTG,+,0.00),0(CAGCTG,+,0.00)
Merged-chr13-11959654-2	chr13	11959508	11959808	-90(CAGCTG,+,0.00),-72(CAGCTG,+,0.00),-54(CAGCTG,+,0.00),-36(CAGCTG,+,0.00),-18(CAGCTG,+,0.00),0(CAGCTG,+,0.00),18(CAGCTG,+,0.00),36(CAGCTG,+,0.00),54(CAGCTG,+,0.00),72(CAGCTG,+,0.00),90(CAGCTG,+,0.00),108(CAGCTG,+,0.00),126(CAGCTG,+,0.00),144(CAGCTG,+,0.00)
Merged-chr4-129862553-2	chr4	129862419	129862719		-21(CAGGTG,+,0.00),0(CAGGTG,+,0.00)	121(CACCTG,+,0.00)
Merged-chr11-99837495-2	chr11	99837348	99837648	-105(CAGCTG,+,0.00),-45(CAGCTG,+,0.00),0(CAGCTG,+,0.00),15(CAGCTG,+,0.00),120(CAGCTG,+,0.00)	-90(CAGGTG,+,0.00),-30(CAGGTG,+,0.00),45(CAGGTG,+,0.00),90(CAGGTG,+,0.00)
Merged-chr3-88147651-2	chr3	88147503	88147803	14(CAGCTG,+,0.00)	0(CAGGTG,+,0.00)	-75(CACCTG,+,0.00),37(CACCTG,+,0.00),88(CACCTG,+,0.00)
Merged-chr8-13929427-2	chr8	13929279	13929579	-28(CAGCTG,+,0.00),-15(CAGCTG,+,0.00)	0(CAGGTG,+,0.00)
Merged-chr4-155136025-1	chr4	155135880	155136180	23(CAGCTG,+,0.00)	-105(CAGGTG,+,0.00),0(CAGGTG,+,0.00)
Merged-chr9-62166313-1	chr9	62166161	62166461	0(CAGCTG,+,0.00),115(CAGCTG,+,0.00)	-10(CAGGTG,+,0.00)	20(CACCTG,+,0.00)
Merged-chr8-70182071-1	chr8	70181922	70182222	0(CAGCTG,+,0.00),11(CAGCTG,+,0.00)		50(CACCTG,+,0.00)
Merged-chr1-125390331-2	chr1	125390183	125390483	-150(CAGCTG,+,0.00),-120(CAGCTG,+,0.00),-90(CAGCTG,+,0.00),-60(CAGCTG,+,0.00),-30(CAGCTG,+,0.00),0(CAGCTG,+,0.00),91(CAGCTG,+,0.00),117(CAGCTG,+,0.00),143(CAGCTG,+,0.00)
Merged-chr19-58691393-2	chr19	58691242	58691542		-146(CAGGTG,+,0.00),-108(CAGGTG,+,0.00),-92(CAGGTG,+,0.00),-54(CAGGTG,+,0.00),-38(CAGGTG,+,0.00),0(CAGGTG,+,0.00),16(CAGGTG,+,0.00)
Merged-chr7-45639672-2	chr7	45639517	45639817		-64(CAGGTG,+,0.00),-27(CAGGTG,+,0.00),0(CAGGTG,+,0.00)	7(CACCTG,+,0.00)
Merged-chr19-31255996-2	chr19	31255842	31256142	-54(CAGCTG,+,0.00),-45(CAGCTG,+,0.00),-36(CAGCTG,+,0.00),-27(CAGCTG,+,0.00),-18(CAGCTG,+,0.00),0(CAGCTG,+,0.00),9(CAGCTG,+,0.00),18(CAGCTG,+,0.00)
Merged-chr4-57851561-2	chr4	57851413	57851713		-140(CAGGTG,+,0.00),-100(CAGGTG,+,0.00),-80(CAGGTG,+,0.00),-60(CAGGTG,+,0.00),-40(CAGGTG,+,0.00),-20(CAGGTG,+,0.00),0(CAGGTG,+,0.00),20(CAGGTG,+,0.00),40(CAGGTG,+,0.00),60(CAGGTG,+,0.00),80(CAGGTG,+,0.00),100(CAGGTG,+,0.00)
Merged-chr11-98743829-2	chr11	98743665	98743965		0(CAGGTG,+,0.00),28(CAGGTG,+,0.00)	74(CACCTG,+,0.00)
Merged-chr7-128058770-2	chr7	128058619	128058919	0(CAGCTG,+,0.00),12(CAGCTG,+,0.00)	-68(CAGGTG,+,0.00)
Merged-chr13-70379467-2	chr13	70379324	70379624	-101(CAGCTG,+,0.00),-84(CAGCTG,+,0.00),-67(CAGCTG,+,0.00),-50(CAGCTG,+,0.00),-17(CAGCTG,+,0.00),16(CAGCTG,+,0.00),49(CAGCTG,+,0.00),66(CAGCTG,+,0.00),83(CAGCTG,+,0.00),100(CAGCTG,+,0.00),117(CAGCTG,+,0.00),133(CAGCTG,+,0.00)	0(CAGGTG,+,0.00)
Merged-chr15-98744038-2	chr15	98743893	98744193	-126(CAGCTG,+,0.00),-87(CAGCTG,+,0.00),-58(CAGCTG,+,0.00),-29(CAGCTG,+,0.00),0(CAGCTG,+,0.00),29(CAGCTG,+,0.00),58(CAGCTG,+,0.00),87(CAGCTG,+,0.00),116(CAGCTG,+,0.00)
Merged-chr18-82953078-2	chr18	82952934	82953234		-73(CAGGTG,+,0.00),-55(CAGGTG,+,0.00),-36(CAGGTG,+,0.00),-12(CAGGTG,+,0.00),0(CAGGTG,+,0.00),13(CAGGTG,+,0.00),25(CAGGTG,+,0.00),38(CAGGTG,+,0.00),64(CAGGTG,+,0.00),76(CAGGTG,+,0.00),89(CAGGTG,+,0.00),101(CAGGTG,+,0.00),114(CAGGTG,+,0.00),127(CAGGTG,+,0.00),140(CAGGTG,+,0.00)	-132(CACCTG,+,0.00)
Merged-chr6-145587747-2	chr6	145587605	145587905		-92(CAGGTG,+,0.00),-78(CAGGTG,+,0.00),-66(CAGGTG,+,0.00),-52(CAGGTG,+,0.00),-40(CAGGTG,+,0.00),-26(CAGGTG,+,0.00),0(CAGGTG,+,0.00),12(CAGGTG,+,0.00),26(CAGGTG,+,0.00)
Merged-chr2-167423361-1	chr2	167423196	167423496		0(CAGGTG,+,0.00)	-80(CACCTG,+,0.00),-50(CACCTG,+,0.00)
Merged-chr4-125720698-2	chr4	125720545	125720845	-115(CAGCTG,+,0.00)	-78(CAGGTG,+,0.00),-39(CAGGTG,+,0.00),-26(CAGGTG,+,0.00),-13(CAGGTG,+,0.00),0(CAGGTG,+,0.00),13(CAGGTG,+,0.00),39(CAGGTG,+,0.00),52(CAGGTG,+,0.00),78(CAGGTG,+,0.00)
Merged-chr11-118043515-2	chr11	118043377	118043677	0(CAGCTG,+,0.00)
Merged-chr11-114650805-2	chr11	114650672	114650972	-150(CAGCTG,+,0.00),-104(CAGCTG,+,0.00),-58(CAGCTG,+,0.00),-12(CAGCTG,+,0.00),34(CAGCTG,+,0.00)	-138(CAGGTG,+,0.00),-92(CAGGTG,+,0.00),-46(CAGGTG,+,0.00),0(CAGGTG,+,0.00),46(CAGGTG,+,0.00)
Merged-chr11-75572394-2	chr11	75572242	75572542	-12(CAGCTG,+,0.00),0(CAGCTG,+,0.00)		75(CACCTG,+,0.00)
Merged-chr18-76657902-2	chr18	76657752	76658052	-68(CAGCTG,+,0.00),19(CAGCTG,+,0.00)	-87(CAGGTG,+,0.00),-80(CAGGTG,+,0.00),-58(CAGGTG,+,0.00),-51(CAGGTG,+,0.00),-29(CAGGTG,+,0.00),-22(CAGGTG,+,0.00),0(CAGGTG,+,0.00),7(CAGGTG,+,0.00),29(CAGGTG,+,0.00),36(CAGGTG,+,0.00),58(CAGGTG,+,0.00),65(CAGGTG,+,0.00),87(CAGGTG,+,0.00),94(CAGGTG,+,0.00),116(CAGGTG,+,0.00),123(CAGGTG,+,0.00)
Merged-chr15-79375283-1	chr15	79375123	79375423		0(CAGGTG,+,0.00)	-22(CACCTG,+,0.00),78(CACCTG,+,0.00)
Merged-chr5-135970397-2	chr5	135970261	135970561	-42(CAGCTG,+,0.00),0(CAGCTG,+,0.00),13(CAGCTG,+,0.00)	71(CAGGTG,+,0.00)
Merged-chr6-94651736-2	chr6	94651575	94651875		0(CAGGTG,+,0.00)	-53(CACCTG,+,0.00)
Merged-chr15-99792551-2	chr15	99792409	99792709	-27(CAGCTG,+,0.00)	-33(CAGGTG,+,0.00),0(CAGGTG,+,0.00)	74(CACCTG,+,0.00)
Merged-chr7-35366360-2	chr7	35366199	35366499		0(CAGGTG,+,0.00),37(CAGGTG,+,0.00),74(CAGGTG,+,0.00)	-19(CACCTG,+,0.00),18(CACCTG,+,0.00),55(CACCTG,+,0.00),90(CACCTG,+,0.00)
Merged-chr7-126069983-1	chr7	126069839	126070139	0(CAGCTG,+,0.00),125(CAGCTG,+,0.00)		-70(CACCTG,+,0.00),-59(CACCTG,+,0.00),-48(CACCTG,+,0.00),-37(CACCTG,+,0.00),-26(CACCTG,+,0.00)
Merged-chr11-99846909-2	chr11	99846761	99847061	-103(CAGCTG,+,0.00),-73(CAGCTG,+,0.00),-58(CAGCTG,+,0.00),-43(CAGCTG,+,0.00),-28(CAGCTG,+,0.00),-13(CAGCTG,+,0.00),0(CAGCTG,+,0.00),15(CAGCTG,+,0.00),29(CAGCTG,+,0.00)		89(CACCTG,+,0.00)
Merged-chr10-9795765-2	chr10	9795612	9795912		-24(CAGGTG,+,0.00),-18(CAGGTG,+,0.00),-12(CAGGTG,+,0.00),-6(CAGGTG,+,0.00),0(CAGGTG,+,0.00),6(CAGGTG,+,0.00),12(CAGGTG,+,0.00),18(CAGGTG,+,0.00),30(CAGGTG,+,0.00),60(CAGGTG,+,0.00)
Merged-chr11-99597998-2	chr11	99597848	99598148	0(CAGCTG,+,0.00),30(CAGCTG,+,0.00),45(CAGCTG,+,0.00),60(CAGCTG,+,0.00)	-10(CAGGTG,+,0.00)	15(CACCTG,+,0.00)
Merged-chr11-117439065-2	chr11	117438927	117439227		-77(CAGGTG,+,0.00),-47(CAGGTG,+,0.00),0(CAGGTG,+,0.00),14(CAGGTG,+,0.00)
Merged-chr11-117475139-2	chr11	117474992	117475292		0(CAGGTG,+,0.00),21(CAGGTG,+,0.00)
Merged-chr4-125119331-2	chr4	125119179	125119479	-18(CAGCTG,+,0.00),0(CAGCTG,+,0.00)		-51(CACCTG,+,0.00)
Merged-chr8-127006493-2	chr8	127006343	127006643	-136(CAGCTG,+,0.00),-119(CAGCTG,+,0.00),-102(CAGCTG,+,0.00),-85(CAGCTG,+,0.00),-68(CAGCTG,+,0.00),-51(CAGCTG,+,0.00),-34(CAGCTG,+,0.00),-17(CAGCTG,+,0.00),0(CAGCTG,+,0.00),17(CAGCTG,+,0.00),51(CAGCTG,+,0.00),85(CAGCTG,+,0.00),119(CAGCTG,+,0.00),136(CAGCTG,+,0.00)
Merged-chr15-101117063-2	chr15	101116901	101117201		-28(CAGGTG,+,0.00),-14(CAGGTG,+,0.00),0(CAGGTG,+,0.00),28(CAGGTG,+,0.00),42(CAGGTG,+,0.00),56(CAGGTG,+,0.00),70(CAGGTG,+,0.00),84(CAGGTG,+,0.00)
Merged-chr13-49188823-1	chr13	49188663	49188963	-74(CAGCTG,+,0.00),-65(CAGCTG,+,0.00),0(CAGCTG,+,0.00)		17(CACCTG,+,0.00)
Merged-chr7-97341184-2	chr7	97341039	97341339	0(CAGCTG,+,0.00),31(CAGCTG,+,0.00)
Merged-chr1-37547063-2	chr1	37546910	37547210	-84(CAGCTG,+,0.00),0(CAGCTG,+,0.00),102(CAGCTG,+,0.00)
Merged-chr15-101235544-1	chr15	101235392	101235692	-71(CAGCTG,+,0.00),64(CAGCTG,+,0.00)	0(CAGGTG,+,0.00),70(CAGGTG,+,0.00),122(CAGGTG,+,0.00)
Merged-chr10-28801092-2	chr10	28800939	28801239		-96(CAGGTG,+,0.00),-84(CAGGTG,+,0.00),-60(CAGGTG,+,0.00),-48(CAGGTG,+,0.00),-36(CAGGTG,+,0.00),-24(CAGGTG,+,0.00),-12(CAGGTG,+,0.00),0(CAGGTG,+,0.00),24(CAGGTG,+,0.00),36(CAGGTG,+,0.00),48(CAGGTG,+,0.00),60(CAGGTG,+,0.00),84(CAGGTG,+,0.00),96(CAGGTG,+,0.00),132(CAGGTG,+,0.00)
Merged-chr7-113016103-1	chr7	113015949	113016249	-29(CAGCTG,+,0.00)	-43(CAGGTG,+,0.00),0(CAGGTG,+,0.00),59(CAGGTG,+,0.00)	-57(CACCTG,+,0.00),144(CACCTG,+,0.00)
Merged-chr10-77836122-2	chr10	77835973	77836273	-45(CAGCTG,+,0.00),-30(CAGCTG,+,0.00),-15(CAGCTG,+,0.00),0(CAGCTG,+,0.00),15(CAGCTG,+,0.00)		65(CACCTG,+,0.00)
Merged-chr10-39161849-2	chr10	39161717	39162017		-13(CAGGTG,+,0.00),0(CAGGTG,+,0.00)	-29(CACCTG,+,0.00),51(CACCTG,+,0.00)
Merged-chr3-103461070-2	chr3	103460925	103461225		0(CAGGTG,+,0.00),6(CAGGTG,+,0.00),12(CAGGTG,+,0.00),18(CAGGTG,+,0.00),24(CAGGTG,+,0.00),30(CAGGTG,+,0.00),36(CAGGTG,+,0.00),42(CAGGTG,+,0.00),48(CAGGTG,+,0.00),54(CAGGTG,+,0.00),60(CAGGTG,+,0.00),66(CAGGTG,+,0.00),72(CAGGTG,+,0.00),78(CAGGTG,+,0.00)
Merged-chr10-78091261-2	chr10	78091110	78091410		-103(CAGGTG,+,0.00),-87(CAGGTG,+,0.00),-31(CAGGTG,+,0.00),-15(CAGGTG,+,0.00),0(CAGGTG,+,0.00),16(CAGGTG,+,0.00),31(CAGGTG,+,0.00),47(CAGGTG,+,0.00),78(CAGGTG,+,0.00),93(CAGGTG,+,0.00),109(CAGGTG,+,0.00),124(CAGGTG,+,0.00),140(CAGGTG,+,0.00)
Merged-chr12-86805025-2	chr12	86804876	86805176	-69(CAGCTG,+,0.00)	-17(CAGGTG,+,0.00),0(CAGGTG,+,0.00),43(CAGGTG,+,0.00)	144(CACCTG,+,0.00)
Merged-chr8-122698619-2	chr8	122698450	122698750	0(CAGCTG,+,0.00),32(CAGCTG,+,0.00)	9(CAGGTG,+,0.00),68(CAGGTG,+,0.00)
Merged-chr18-46878832-1	chr18	46878673	46878973	-98(CAGCTG,+,0.00)	-48(CAGGTG,+,0.00),-32(CAGGTG,+,0.00),-16(CAGGTG,+,0.00),0(CAGGTG,+,0.00),32(CAGGTG,+,0.00),48(CAGGTG,+,0.00),64(CAGGTG,+,0.00),80(CAGGTG,+,0.00),142(CAGGTG,+,0.00)
Merged-chr10-7133254-2	chr10	7133107	7133407	-12(CAGCTG,+,0.00),12(CAGCTG,+,0.00),36(CAGCTG,+,0.00),60(CAGCTG,+,0.00)	-45(CAGGTG,+,0.00),0(CAGGTG,+,0.00),24(CAGGTG,+,0.00),48(CAGGTG,+,0.00),72(CAGGTG,+,0.00)
Merged-chr18-81042371-2	chr18	81042225	81042525		-76(CAGGTG,+,0.00),-54(CAGGTG,+,0.00),-35(CAGGTG,+,0.00),-19(CAGGTG,+,0.00),0(CAGGTG,+,0.00),19(CAGGTG,+,0.00),35(CAGGTG,+,0.00),54(CAGGTG,+,0.00),70(CAGGTG,+,0.00)
Merged-chr6-50279344-2	chr6	50279185	50279485	-36(CAGCTG,+,0.00),0(CAGCTG,+,0.00)		90(CACCTG,+,0.00)
Merged-chr8-121921627-1	chr8	121921479	121921779	-88(CAGCTG,+,0.00),0(CAGCTG,+,0.00)
Merged-chr4-59610667-2	chr4	59610518	59610818	-126(CAGCTG,+,0.00),-90(CAGCTG,+,0.00),-72(CAGCTG,+,0.00),-54(CAGCTG,+,0.00),-36(CAGCTG,+,0.00),-18(CAGCTG,+,0.00),0(CAGCTG,+,0.00),36(CAGCTG,+,0.00)
Merged-chr10-81242200-1	chr10	81242058	81242358	0(CAGCTG,+,0.00)	25(CAGGTG,+,0.00),120(CAGGTG,+,0.00)
Merged-chr7-64235510-2	chr7	64235364	64235664		-126(CAGGTG,+,0.00),-84(CAGGTG,+,0.00),-42(CAGGTG,+,0.00),0(CAGGTG,+,0.00),42(CAGGTG,+,0.00),84(CAGGTG,+,0.00),126(CAGGTG,+,0.00)	-144(CACCTG,+,0.00),-133(CACCTG,+,0.00),-91(CACCTG,+,0.00),-60(CACCTG,+,0.00),-49(CACCTG,+,0.00),-18(CACCTG,+,0.00),24(CACCTG,+,0.00),66(CACCTG,+,0.00),119(CACCTG,+,0.00)
Merged-chr11-61410293-2	chr11	61410137	61410437		-87(CAGGTG,+,0.00),0(CAGGTG,+,0.00)	40(CACCTG,+,0.00)
Merged-chr5-125111291-2	chr5	125111159	125111459	0(CAGCTG,+,0.00),54(CAGCTG,+,0.00)	114(CAGGTG,+,0.00)
Merged-chr5-113217831-1	chr5	113217678	113217978		-131(CAGGTG,+,0.00),-123(CAGGTG,+,0.00),-109(CAGGTG,+,0.00),-65(CAGGTG,+,0.00),-21(CAGGTG,+,0.00),0(CAGGTG,+,0.00),22(CAGGTG,+,0.00),44(CAGGTG,+,0.00),66(CAGGTG,+,0.00),87(CAGGTG,+,0.00),130(CAGGTG,+,0.00)
Merged-chr10-43992330-2	chr10	43992185	43992485	-92(CAGCTG,+,0.00),-57(CAGCTG,+,0.00),-22(CAGCTG,+,0.00),13(CAGCTG,+,0.00),48(CAGCTG,+,0.00),83(CAGCTG,+,0.00),118(CAGCTG,+,0.00)	-70(CAGGTG,+,0.00),0(CAGGTG,+,0.00),70(CAGGTG,+,0.00),140(CAGGTG,+,0.00)
Merged-chr2-34480405-2	chr2	34480256	34480556	-101(CAGCTG,+,0.00),-17(CAGCTG,+,0.00),0(CAGCTG,+,0.00)		13(CACCTG,+,0.00)
Merged-chr12-84729771-2	chr12	84729613	84729913		-144(CAGGTG,+,0.00),-126(CAGGTG,+,0.00),-108(CAGGTG,+,0.00),-90(CAGGTG,+,0.00),-72(CAGGTG,+,0.00),-54(CAGGTG,+,0.00),-36(CAGGTG,+,0.00),-18(CAGGTG,+,0.00),0(CAGGTG,+,0.00),18(CAGGTG,+,0.00),36(CAGGTG,+,0.00),54(CAGGTG,+,0.00),72(CAGGTG,+,0.00),90(CAGGTG,+,0.00)
Merged-chr12-17652867-2	chr12	17652734	17653034	0(CAGCTG,+,0.00),10(CAGCTG,+,0.00)	56(CAGGTG,+,0.00)
Merged-chr13-14092698-2	chr13	14092538	14092838		0(CAGGTG,+,0.00)	15(CACCTG,+,0.00)
Merged-chr13-59096715-1	chr13	59096570	59096870		-75(CAGGTG,+,0.00),-60(CAGGTG,+,0.00),-45(CAGGTG,+,0.00),-15(CAGGTG,+,0.00),0(CAGGTG,+,0.00),15(CAGGTG,+,0.00),45(CAGGTG,+,0.00),75(CAGGTG,+,0.00),90(CAGGTG,+,0.00),120(CAGGTG,+,0.00),135(CAGGTG,+,0.00)
Merged-chr5-26277128-2	chr5	26276994	26277294	-48(CAGCTG,+,0.00),0(CAGCTG,+,0.00),38(CAGCTG,+,0.00)
Merged-chr16-13976633-2	chr16	13976464	13976764		0(CAGGTG,+,0.00),45(CAGGTG,+,0.00)
Merged-chr1-74809214-1	chr1	74809075	74809375	0(CAGCTG,+,0.00)
Merged-chr15-59189584-2	chr15	59189432	59189732	-88(CAGCTG,+,0.00)	0(CAGGTG,+,0.00),9(CAGGTG,+,0.00)	-37(CACCTG,+,0.00),-15(CACCTG,+,0.00)
Merged-chr15-79619943-2	chr15	79619797	79620097	0(CAGCTG,+,0.00),37(CAGCTG,+,0.00)
Merged-chr1-92365699-2	chr1	92365555	92365855	62(CAGCTG,+,0.00)	0(CAGGTG,+,0.00),30(CAGGTG,+,0.00)	-63(CACCTG,+,0.00),121(CACCTG,+,0.00)
Merged-chr14-63182848-2	chr14	63182683	63182983	-93(CAGCTG,+,0.00),-80(CAGCTG,+,0.00),-52(CAGCTG,+,0.00),-39(CAGCTG,+,0.00),0(CAGCTG,+,0.00)
Merged-chr15-83991593-1	chr15	83991442	83991742	-21(CAGCTG,+,0.00),0(CAGCTG,+,0.00)		15(CACCTG,+,0.00)
Merged-chr7-29471538-2	chr7	29471407	29471707	-36(CAGCTG,+,0.00),53(CAGCTG,+,0.00)	-47(CAGGTG,+,0.00),0(CAGGTG,+,0.00)
Merged-chr9-62180711-2	chr9	62180555	62180855	25(CAGCTG,+,0.00)	-20(CAGGTG,+,0.00),0(CAGGTG,+,0.00),67(CAGGTG,+,0.00)
Merged-chr5-30728963-2	chr5	30728804	30729104	-127(CAGCTG,+,0.00),-94(CAGCTG,+,0.00),-61(CAGCTG,+,0.00),-28(CAGCTG,+,0.00),93(CAGCTG,+,0.00)	-107(CAGGTG,+,0.00),-74(CAGGTG,+,0.00),-41(CAGGTG,+,0.00),0(CAGGTG,+,0.00),40(CAGGTG,+,0.00),80(CAGGTG,+,0.00),120(CAGGTG,+,0.00)
Merged-chr2-158631630-2	chr2	158631489	158631789	-51(CAGCTG,+,0.00),0(CAGCTG,+,0.00)	43(CAGGTG,+,0.00)
Merged-chr4-138465663-2	chr4	138465500	138465800	-86(CAGCTG,+,0.00),89(CAGCTG,+,0.00)	-99(CAGGTG,+,0.00),0(CAGGTG,+,0.00),23(CAGGTG,+,0.00)
Merged-chr19-47222764-2	chr19	47222608	47222908	19(CAGCTG,+,0.00),26(CAGCTG,+,0.00)	0(CAGGTG,+,0.00),57(CAGGTG,+,0.00)
Merged-chr3-94960516-2	chr3	94960373	94960673	-26(CAGCTG,+,0.00)	0(CAGGTG,+,0.00)
Merged-chr6-147377880-2	chr6	147377725	147378025		-44(CAGGTG,+,0.00),-33(CAGGTG,+,0.00),-22(CAGGTG,+,0.00),-11(CAGGTG,+,0.00),0(CAGGTG,+,0.00),11(CAGGTG,+,0.00),33(CAGGTG,+,0.00),99(CAGGTG,+,0.00),121(CAGGTG,+,0.00),143(CAGGTG,+,0.00)
Merged-chr4-151922264-2	chr4	151922130	151922430	-137(CAGCTG,+,0.00),-122(CAGCTG,+,0.00),-105(CAGCTG,+,0.00),-90(CAGCTG,+,0.00),-79(CAGCTG,+,0.00),-64(CAGCTG,+,0.00),-47(CAGCTG,+,0.00),0(CAGCTG,+,0.00),32(CAGCTG,+,0.00),49(CAGCTG,+,0.00),64(CAGCTG,+,0.00),81(CAGCTG,+,0.00),96(CAGCTG,+,0.00),113(CAGCTG,+,0.00),128(CAGCTG,+,0.00),139(CAGCTG,+,0.00)
Merged-chr3-27205173-1	chr3	27205024	27205324	-11(CAGCTG,+,0.00),0(CAGCTG,+,0.00)
Merged-chr4-140273210-2	chr4	140273062	140273362		-150(CAGGTG,+,0.00),-141(CAGGTG,+,0.00),-123(CAGGTG,+,0.00),-105(CAGGTG,+,0.00),-96(CAGGTG,+,0.00),-73(CAGGTG,+,0.00),-64(CAGGTG,+,0.00),-55(CAGGTG,+,0.00),-32(CAGGTG,+,0.00),-9(CAGGTG,+,0.00),0(CAGGTG,+,0.00),9(CAGGTG,+,0.00),18(CAGGTG,+,0.00),45(CAGGTG,+,0.00),59(CAGGTG,+,0.00),68(CAGGTG,+,0.00),77(CAGGTG,+,0.00),95(CAGGTG,+,0.00),104(CAGGTG,+,0.00)	144(CACCTG,+,0.00)
Merged-chr10-69817177-2	chr10	69817024	69817324		-110(CAGGTG,+,0.00),-11(CAGGTG,+,0.00),0(CAGGTG,+,0.00),11(CAGGTG,+,0.00),22(CAGGTG,+,0.00),33(CAGGTG,+,0.00)	44(CACCTG,+,0.00)
Merged-chr11-4940492-2	chr11	4940339	4940639	-144(CAGCTG,+,0.00),-126(CAGCTG,+,0.00),-108(CAGCTG,+,0.00),-72(CAGCTG,+,0.00),-54(CAGCTG,+,0.00),-36(CAGCTG,+,0.00),-18(CAGCTG,+,0.00),0(CAGCTG,+,0.00),36(CAGCTG,+,0.00),54(CAGCTG,+,0.00),72(CAGCTG,+,0.00),126(CAGCTG,+,0.00),144(CAGCTG,+,0.00)	-90(CAGGTG,+,0.00),18(CAGGTG,+,0.00),90(CAGGTG,+,0.00),108(CAGGTG,+,0.00)
Merged-chr4-131912778-2	chr4	131912628	131912928	0(CAGCTG,+,0.00),40(CAGCTG,+,0.00)	-11(CAGGTG,+,0.00),9(CAGGTG,+,0.00),29(CAGGTG,+,0.00)
Merged-chr11-31398844-2	chr11	31398711	31399011	-12(CAGCTG,+,0.00),50(CAGCTG,+,0.00)	0(CAGGTG,+,0.00)
Merged-chr19-21816390-2	chr19	21816242	21816542	44(CAGCTG,+,0.00)	-142(CAGGTG,+,0.00),-78(CAGGTG,+,0.00),-46(CAGGTG,+,0.00),-32(CAGGTG,+,0.00),-16(CAGGTG,+,0.00),0(CAGGTG,+,0.00),16(CAGGTG,+,0.00),56(CAGGTG,+,0.00)
Merged-chr8-120384034-2	chr8	120383907	120384207		0(CAGGTG,+,0.00),50(CAGGTG,+,0.00)
Merged-chr9-21719405-1	chr9	21719247	21719547	-23(CAGCTG,+,0.00)	0(CAGGTG,+,0.00)	26(CACCTG,+,0.00)
Merged-chr1-86612250-2	chr1	86612092	86612392	0(CAGCTG,+,0.00)	11(CAGGTG,+,0.00)
Merged-chr2-163883383-2	chr2	163883234	163883534	0(CAGCTG,+,0.00)	-13(CAGGTG,+,0.00)
Merged-chr7-127084993-2	chr7	127084849	127085149		-95(CAGGTG,+,0.00),-56(CAGGTG,+,0.00),-28(CAGGTG,+,0.00),0(CAGGTG,+,0.00),39(CAGGTG,+,0.00),52(CAGGTG,+,0.00)
Merged-chr17-26442525-2	chr17	26442374	26442674	-19(CAGCTG,+,0.00),0(CAGCTG,+,0.00)	-66(CAGGTG,+,0.00),-9(CAGGTG,+,0.00)
Merged-chr11-49589133-2	chr11	49589003	49589303		-72(CAGGTG,+,0.00),-60(CAGGTG,+,0.00),-48(CAGGTG,+,0.00),-36(CAGGTG,+,0.00),-24(CAGGTG,+,0.00),0(CAGGTG,+,0.00),48(CAGGTG,+,0.00),84(CAGGTG,+,0.00),96(CAGGTG,+,0.00)	-120(CACCTG,+,0.00),108(CACCTG,+,0.00)
Merged-chr11-115357633-2	chr11	115357485	115357785	-54(CAGCTG,+,0.00),-40(CAGCTG,+,0.00),-27(CAGCTG,+,0.00),-13(CAGCTG,+,0.00),0(CAGCTG,+,0.00),14(CAGCTG,+,0.00),28(CAGCTG,+,0.00),42(CAGCTG,+,0.00),56(CAGCTG,+,0.00),70(CAGCTG,+,0.00),83(CAGCTG,+,0.00),97(CAGCTG,+,0.00)		-79(CACCTG,+,0.00)
Merged-chr19-5394372-2	chr19	5394227	5394527		-48(CAGGTG,+,0.00),0(CAGGTG,+,0.00),12(CAGGTG,+,0.00)
Merged-chr5-37729149-2	chr5	37728990	37729290		-128(CAGGTG,+,0.00),-112(CAGGTG,+,0.00),-92(CAGGTG,+,0.00),-72(CAGGTG,+,0.00),-52(CAGGTG,+,0.00),-36(CAGGTG,+,0.00),-20(CAGGTG,+,0.00),0(CAGGTG,+,0.00),16(CAGGTG,+,0.00),32(CAGGTG,+,0.00),64(CAGGTG,+,0.00),80(CAGGTG,+,0.00)
Merged-chr7-25100142-1	chr7	25099990	25100290	-76(CAGCTG,+,0.00)	0(CAGGTG,+,0.00)	-42(CACCTG,+,0.00),55(CACCTG,+,0.00)
Merged-chr2-164435753-2	chr2	164435611	164435911		0(CAGGTG,+,0.00),12(CAGGTG,+,0.00),30(CAGGTG,+,0.00)
Merged-chr17-47739899-2	chr17	47739774	47740074	-11(CAGCTG,+,0.00)	0(CAGGTG,+,0.00)
Merged-chr4-148068427-2	chr4	148068252	148068552	-24(CAGCTG,+,0.00)	-48(CAGGTG,+,0.00),0(CAGGTG,+,0.00)
Merged-chr2-172412622-2	chr2	172412474	172412774	-97(CAGCTG,+,0.00),0(CAGCTG,+,0.00),20(CAGCTG,+,0.00)
Merged-chr2-165470402-2	chr2	165470238	165470538	0(CAGCTG,+,0.00),72(CAGCTG,+,0.00),137(CAGCTG,+,0.00)	114(CAGGTG,+,0.00)
Merged-chr13-55600182-1	chr13	55600025	55600325	0(CAGCTG,+,0.00)		-20(CACCTG,+,0.00)
Merged-chr8-119851556-2	chr8	119851416	119851716		-126(CAGGTG,+,0.00),-79(CAGGTG,+,0.00),-47(CAGGTG,+,0.00),0(CAGGTG,+,0.00),31(CAGGTG,+,0.00),127(CAGGTG,+,0.00)	-142(CACCTG,+,0.00),-110(CACCTG,+,0.00),-94(CACCTG,+,0.00),-63(CACCTG,+,0.00),16(CACCTG,+,0.00),47(CACCTG,+,0.00),63(CACCTG,+,0.00),79(CACCTG,+,0.00),95(CACCTG,+,0.00),111(CACCTG,+,0.00)
Merged-chr3-32238607-2	chr3	32238452	32238752		-132(CAGGTG,+,0.00),-120(CAGGTG,+,0.00),-108(CAGGTG,+,0.00),-96(CAGGTG,+,0.00),-84(CAGGTG,+,0.00),-72(CAGGTG,+,0.00),-48(CAGGTG,+,0.00),-36(CAGGTG,+,0.00),-24(CAGGTG,+,0.00),-12(CAGGTG,+,0.00),0(CAGGTG,+,0.00),36(CAGGTG,+,0.00),60(CAGGTG,+,0.00)
Merged-chr7-29506439-2	chr7	29506272	29506572	49(CAGCTG,+,0.00)	-82(CAGGTG,+,0.00),0(CAGGTG,+,0.00),24(CAGGTG,+,0.00)	-71(CACCTG,+,0.00)
Merged-chr5-52424920-2	chr5	52424775	52425075		-84(CAGGTG,+,0.00),-72(CAGGTG,+,0.00),-60(CAGGTG,+,0.00),-48(CAGGTG,+,0.00),-36(CAGGTG,+,0.00),-24(CAGGTG,+,0.00),0(CAGGTG,+,0.00),12(CAGGTG,+,0.00),26(CAGGTG,+,0.00),38(CAGGTG,+,0.00)
Merged-chr8-124905662-2	chr8	124905517	124905817		-24(CAGGTG,+,0.00),0(CAGGTG,+,0.00)	-41(CACCTG,+,0.00)
Merged-chr17-66546553-2	chr17	66546400	66546700		-147(CAGGTG,+,0.00),-126(CAGGTG,+,0.00),-119(CAGGTG,+,0.00),-105(CAGGTG,+,0.00),-98(CAGGTG,+,0.00),-84(CAGGTG,+,0.00),-63(CAGGTG,+,0.00),-21(CAGGTG,+,0.00),0(CAGGTG,+,0.00),7(CAGGTG,+,0.00),21(CAGGTG,+,0.00),42(CAGGTG,+,0.00),63(CAGGTG,+,0.00),70(CAGGTG,+,0.00),84(CAGGTG,+,0.00),105(CAGGTG,+,0.00),126(CAGGTG,+,0.00)
Merged-chr2-178603564-2	chr2	178603427	178603727	0(CAGCTG,+,0.00)	-54(CAGGTG,+,0.00),20(CAGGTG,+,0.00),40(CAGGTG,+,0.00)
Merged-chr2-31436375-2	chr2	31436230	31436530		-140(CAGGTG,+,0.00),-120(CAGGTG,+,0.00),-100(CAGGTG,+,0.00),-80(CAGGTG,+,0.00),-60(CAGGTG,+,0.00),-40(CAGGTG,+,0.00),-20(CAGGTG,+,0.00),0(CAGGTG,+,0.00),20(CAGGTG,+,0.00),40(CAGGTG,+,0.00),60(CAGGTG,+,0.00)
Merged-chr7-4251274-2	chr7	4251119	4251419		0(CAGGTG,+,0.00),28(CAGGTG,+,0.00)
Merged-chr4-134773623-2	chr4	134773476	134773776	23(CAGCTG,+,0.00),33(CAGCTG,+,0.00)	-82(CAGGTG,+,0.00),0(CAGGTG,+,0.00)
Merged-chr5-109875801-2	chr5	109875651	109875951	-14(CAGCTG,+,0.00),0(CAGCTG,+,0.00)	16(CAGGTG,+,0.00)
Merged-chr7-142212248-2	chr7	142212113	142212413	-99(CAGCTG,+,0.00),-84(CAGCTG,+,0.00),-54(CAGCTG,+,0.00),0(CAGCTG,+,0.00),30(CAGCTG,+,0.00),84(CAGCTG,+,0.00),114(CAGCTG,+,0.00)
Merged-chr3-28220138-2	chr3	28220000	28220300	-63(CAGCTG,+,0.00),-33(CAGCTG,+,0.00),0(CAGCTG,+,0.00)	16(CAGGTG,+,0.00)
Merged-chr12-104644873-2	chr12	104644709	104645009		-145(CAGGTG,+,0.00),-116(CAGGTG,+,0.00),-87(CAGGTG,+,0.00),-58(CAGGTG,+,0.00),-29(CAGGTG,+,0.00),0(CAGGTG,+,0.00),29(CAGGTG,+,0.00),58(CAGGTG,+,0.00),87(CAGGTG,+,0.00)
Merged-chr6-32770133-2	chr6	32769987	32770287		-119(CAGGTG,+,0.00),-21(CAGGTG,+,0.00),0(CAGGTG,+,0.00)	-10(CACCTG,+,0.00),94(CACCTG,+,0.00)
Merged-chr5-35211591-2	chr5	35211443	35211743		-42(CAGGTG,+,0.00),-12(CAGGTG,+,0.00),0(CAGGTG,+,0.00),12(CAGGTG,+,0.00),48(CAGGTG,+,0.00),60(CAGGTG,+,0.00),84(CAGGTG,+,0.00),96(CAGGTG,+,0.00)
Merged-chr11-4146539-2	chr11	4146394	4146694	-141(CAGCTG,+,0.00),-57(CAGCTG,+,0.00)	0(CAGGTG,+,0.00)
Merged-chr7-45216898-1	chr7	45216748	45217048	0(CAGCTG,+,0.00)	-115(CAGGTG,+,0.00),-21(CAGGTG,+,0.00)	-128(CACCTG,+,0.00)
Merged-chr17-31307940-2	chr17	31307791	31308091		0(CAGGTG,+,0.00),18(CAGGTG,+,0.00)
Merged-chr7-19388945-2	chr7	19388796	19389096	0(CAGCTG,+,0.00),66(CAGCTG,+,0.00),80(CAGCTG,+,0.00)	-122(CAGGTG,+,0.00)
Merged-chr11-99785618-2	chr11	99785472	99785772	-135(CAGCTG,+,0.00),-120(CAGCTG,+,0.00),-105(CAGCTG,+,0.00),-90(CAGCTG,+,0.00),-45(CAGCTG,+,0.00),-15(CAGCTG,+,0.00),15(CAGCTG,+,0.00),75(CAGCTG,+,0.00),90(CAGCTG,+,0.00),132(CAGCTG,+,0.00)	-75(CAGGTG,+,0.00),0(CAGGTG,+,0.00),30(CAGGTG,+,0.00)
Merged-chr17-28150203-2	chr17	28150060	28150360		0(CAGGTG,+,0.00)	21(CACCTG,+,0.00)
Merged-chr14-63489456-1	chr14	63489315	63489615	0(CAGCTG,+,0.00)
Merged-chr18-83256087-2	chr18	83255940	83256240		-111(CAGGTG,+,0.00),-99(CAGGTG,+,0.00),-68(CAGGTG,+,0.00),-56(CAGGTG,+,0.00),-50(CAGGTG,+,0.00),-19(CAGGTG,+,0.00),0(CAGGTG,+,0.00),12(CAGGTG,+,0.00),24(CAGGTG,+,0.00),30(CAGGTG,+,0.00),36(CAGGTG,+,0.00),42(CAGGTG,+,0.00),53(CAGGTG,+,0.00),77(CAGGTG,+,0.00),92(CAGGTG,+,0.00),104(CAGGTG,+,0.00),116(CAGGTG,+,0.00),122(CAGGTG,+,0.00),128(CAGGTG,+,0.00),134(CAGGTG,+,0.00),145(CAGGTG,+,0.00)
Merged-chr5-122311858-2	chr5	122311714	122312014	0(CAGCTG,+,0.00),64(CAGCTG,+,0.00)	-23(CAGGTG,+,0.00)
Merged-chr8-72375301-2	chr8	72375169	72375469	-54(CAGCTG,+,0.00),0(CAGCTG,+,0.00),118(CAGCTG,+,0.00)
Merged-chr5-122800051-2	chr5	122799901	122800201	-136(CAGCTG,+,0.00),-34(CAGCTG,+,0.00),0(CAGCTG,+,0.00)		-114(CACCTG,+,0.00),32(CACCTG,+,0.00)
Merged-chr5-107386661-2	chr5	107386511	107386811		-135(CAGGTG,+,0.00),-108(CAGGTG,+,0.00),-81(CAGGTG,+,0.00),-54(CAGGTG,+,0.00),-27(CAGGTG,+,0.00),0(CAGGTG,+,0.00),27(CAGGTG,+,0.00),54(CAGGTG,+,0.00),108(CAGGTG,+,0.00),135(CAGGTG,+,0.00)
Merged-chr13-107668699-2	chr13	107668550	107668850	-19(CAGCTG,+,0.00),0(CAGCTG,+,0.00)
Merged-chr4-13324964-2	chr4	13324814	13325114	0(CAGCTG,+,0.00),34(CAGCTG,+,0.00)	-120(CAGGTG,+,0.00),-54(CAGGTG,+,0.00)	62(CACCTG,+,0.00)
Merged-chr17-28154178-2	chr17	28154037	28154337	0(CAGCTG,+,0.00)	-22(CAGGTG,+,0.00),16(CAGGTG,+,0.00)
Merged-chr2-28839903-2	chr2	28839748	28840048	0(CAGCTG,+,0.00)
Merged-chr7-143401637-2	chr7	143401485	143401785	-91(CAGCTG,+,0.00),-50(CAGCTG,+,0.00),-21(CAGCTG,+,0.00),24(CAGCTG,+,0.00)	0(CAGGTG,+,0.00)	-123(CACCTG,+,0.00)
Merged-chr6-92251808-2	chr6	92251645	92251945	-54(CAGCTG,+,0.00),0(CAGCTG,+,0.00)	-80(CAGGTG,+,0.00)	78(CACCTG,+,0.00)
Merged-chr5-21617846-2	chr5	21617700	21618000		-133(CAGGTG,+,0.00),-57(CAGGTG,+,0.00),-47(CAGGTG,+,0.00),-9(CAGGTG,+,0.00),0(CAGGTG,+,0.00),19(CAGGTG,+,0.00),38(CAGGTG,+,0.00),48(CAGGTG,+,0.00),86(CAGGTG,+,0.00)
Merged-chr9-106212747-1	chr9	106212617	106212917	114(CAGCTG,+,0.00)	-19(CAGGTG,+,0.00),0(CAGGTG,+,0.00)
Merged-chr17-87272776-2	chr17	87272612	87272912		0(CAGGTG,+,0.00),14(CAGGTG,+,0.00),29(CAGGTG,+,0.00),73(CAGGTG,+,0.00),102(CAGGTG,+,0.00),144(CAGGTG,+,0.00)
Merged-chr9-58443206-2	chr9	58443055	58443355	-97(CAGCTG,+,0.00)	0(CAGGTG,+,0.00)
Merged-chr9-118875926-1	chr9	118875775	118876075	0(CAGCTG,+,0.00)
Merged-chr16-32117950-2	chr16	32117802	32118102		0(CAGGTG,+,0.00),24(CAGGTG,+,0.00)	-83(CACCTG,+,0.00),-50(CACCTG,+,0.00),-31(CACCTG,+,0.00),-25(CACCTG,+,0.00),-17(CACCTG,+,0.00),11(CACCTG,+,0.00)
Merged-chr8-125794763-2	chr8	125794609	125794909	-61(CAGCTG,+,0.00),37(CAGCTG,+,0.00)	0(CAGGTG,+,0.00)	-72(CACCTG,+,0.00)
Merged-chr9-102692741-2	chr9	102692575	102692875	0(CAGCTG,+,0.00)	73(CAGGTG,+,0.00)
Merged-chr18-67330416-2	chr18	67330263	67330563	-126(CAGCTG,+,0.00),0(CAGCTG,+,0.00)	-134(CAGGTG,+,0.00)
Merged-chr5-101095676-2	chr5	101095526	101095826	-30(CAGCTG,+,0.00),-9(CAGCTG,+,0.00),29(CAGCTG,+,0.00),74(CAGCTG,+,0.00)	-42(CAGGTG,+,0.00),-21(CAGGTG,+,0.00),0(CAGGTG,+,0.00)	12(CACCTG,+,0.00)
Merged-chr1-190168517-2	chr1	190168358	190168658		0(CAGGTG,+,0.00),23(CAGGTG,+,0.00)
Merged-chr4-155276961-1	chr4	155276833	155277133		0(CAGGTG,+,0.00)	-46(CACCTG,+,0.00),-34(CACCTG,+,0.00),-22(CACCTG,+,0.00)
Merged-chr17-49291139-2	chr17	49290988	49291288		-108(CAGGTG,+,0.00),-90(CAGGTG,+,0.00),-84(CAGGTG,+,0.00),-78(CAGGTG,+,0.00),-72(CAGGTG,+,0.00),-66(CAGGTG,+,0.00),-60(CAGGTG,+,0.00),-54(CAGGTG,+,0.00),-48(CAGGTG,+,0.00),-42(CAGGTG,+,0.00),-24(CAGGTG,+,0.00),-18(CAGGTG,+,0.00),-12(CAGGTG,+,0.00),-6(CAGGTG,+,0.00),0(CAGGTG,+,0.00),30(CAGGTG,+,0.00),36(CAGGTG,+,0.00),60(CAGGTG,+,0.00)
Merged-chr4-153358309-2	chr4	153358147	153358447	-88(CAGCTG,+,0.00),0(CAGCTG,+,0.00)
Merged-chr8-105833917-2	chr8	105833766	105834066	-80(CAGCTG,+,0.00),-64(CAGCTG,+,0.00),-48(CAGCTG,+,0.00),-32(CAGCTG,+,0.00),-16(CAGCTG,+,0.00),0(CAGCTG,+,0.00),16(CAGCTG,+,0.00),32(CAGCTG,+,0.00),48(CAGCTG,+,0.00),80(CAGCTG,+,0.00),96(CAGCTG,+,0.00)		126(CACCTG,+,0.00)
Merged-chr9-46242984-2	chr9	46242835	46243135	-99(CAGCTG,+,0.00),0(CAGCTG,+,0.00),78(CAGCTG,+,0.00),99(CAGCTG,+,0.00)	12(CAGGTG,+,0.00)
Merged-chr9-45269289-2	chr9	45269152	45269452	0(CAGCTG,+,0.00)
Merged-chr9-63462474-2	chr9	63462318	63462618	0(CAGCTG,+,0.00)
Merged-chr9-65545014-2	chr9	65544867	65545167		-78(CAGGTG,+,0.00),-52(CAGGTG,+,0.00),-26(CAGGTG,+,0.00),0(CAGGTG,+,0.00),26(CAGGTG,+,0.00),52(CAGGTG,+,0.00),104(CAGGTG,+,0.00)
Merged-chr9-121299536-1	chr9	121299384	121299684		0(CAGGTG,+,0.00)	-33(CACCTG,+,0.00)
Merged-chr9-25795704-2	chr9	25795553	25795853	-23(CAGCTG,+,0.00),-11(CAGCTG,+,0.00),0(CAGCTG,+,0.00)	11(CAGGTG,+,0.00)
Merged-chr16-17977686-2	chr16	17977538	17977838		0(CAGGTG,+,0.00)	-22(CACCTG,+,0.00),-13(CACCTG,+,0.00),65(CACCTG,+,0.00)
Merged-chr16-21679073-2	chr16	21678925	21679225	-97(CAGCTG,+,0.00),-73(CAGCTG,+,0.00),0(CAGCTG,+,0.00),47(CAGCTG,+,0.00),120(CAGCTG,+,0.00),144(CAGCTG,+,0.00)	-79(CAGGTG,+,0.00),-48(CAGGTG,+,0.00),-30(CAGGTG,+,0.00),-24(CAGGTG,+,0.00),-6(CAGGTG,+,0.00),18(CAGGTG,+,0.00),65(CAGGTG,+,0.00),96(CAGGTG,+,0.00),138(CAGGTG,+,0.00)
Merged-chr2-179392023-2	chr2	179391867	179392167	-150(CAGCTG,+,0.00),-128(CAGCTG,+,0.00),-107(CAGCTG,+,0.00),-86(CAGCTG,+,0.00),-65(CAGCTG,+,0.00),-22(CAGCTG,+,0.00),0(CAGCTG,+,0.00),21(CAGCTG,+,0.00),42(CAGCTG,+,0.00),68(CAGCTG,+,0.00),89(CAGCTG,+,0.00)
Merged-chr17-66546051-2	chr17	66545889	66546189		-133(CAGGTG,+,0.00),-126(CAGGTG,+,0.00),-112(CAGGTG,+,0.00),-91(CAGGTG,+,0.00),-49(CAGGTG,+,0.00),-28(CAGGTG,+,0.00),0(CAGGTG,+,0.00),14(CAGGTG,+,0.00),21(CAGGTG,+,0.00),35(CAGGTG,+,0.00),56(CAGGTG,+,0.00),77(CAGGTG,+,0.00),84(CAGGTG,+,0.00),98(CAGGTG,+,0.00),105(CAGGTG,+,0.00),119(CAGGTG,+,0.00),140(CAGGTG,+,0.00)
Merged-chr5-106044460-2	chr5	106044307	106044607		-33(CAGGTG,+,0.00),-22(CAGGTG,+,0.00),-11(CAGGTG,+,0.00),0(CAGGTG,+,0.00),12(CAGGTG,+,0.00),23(CAGGTG,+,0.00),34(CAGGTG,+,0.00),45(CAGGTG,+,0.00),56(CAGGTG,+,0.00),110(CAGGTG,+,0.00)
Merged-chr12-73242163-2	chr12	73242028	73242328	-72(CAGCTG,+,0.00),0(CAGCTG,+,0.00),40(CAGCTG,+,0.00)
Merged-chr5-120601437-2	chr5	120601303	120601603	0(CAGCTG,+,0.00)		-105(CACCTG,+,0.00),70(CACCTG,+,0.00)
Merged-chr5-26725702-2	chr5	26725557	26725857		-47(CAGGTG,+,0.00),0(CAGGTG,+,0.00)
Merged-chr10-7149988-2	chr10	7149829	7150129		-38(CAGGTG,+,0.00),0(CAGGTG,+,0.00)
Merged-chr17-36788952-1	chr17	36788786	36789086	0(CAGCTG,+,0.00)	-50(CAGGTG,+,0.00)
Merged-chr4-123746710-2	chr4	123746576	123746876	-122(CAGCTG,+,0.00),-15(CAGCTG,+,0.00)	0(CAGGTG,+,0.00),90(CAGGTG,+,0.00)
Merged-chr7-81478466-2	chr7	81478322	81478622	-17(CAGCTG,+,0.00),0(CAGCTG,+,0.00)		30(CACCTG,+,0.00)
Merged-chr9-106646813-1	chr9	106646666	106646966		-97(CAGGTG,+,0.00),-72(CAGGTG,+,0.00),-47(CAGGTG,+,0.00),-24(CAGGTG,+,0.00),0(CAGGTG,+,0.00),23(CAGGTG,+,0.00)
Merged-chr9-36993516-2	chr9	36993364	36993664		-104(CAGGTG,+,0.00),-96(CAGGTG,+,0.00),-80(CAGGTG,+,0.00),-64(CAGGTG,+,0.00),-40(CAGGTG,+,0.00),-32(CAGGTG,+,0.00),-16(CAGGTG,+,0.00),0(CAGGTG,+,0.00),73(CAGGTG,+,0.00),105(CAGGTG,+,0.00)
Merged-chr3-8703098-2	chr3	8702931	8703231		0(CAGGTG,+,0.00),11(CAGGTG,+,0.00),22(CAGGTG,+,0.00),33(CAGGTG,+,0.00),44(CAGGTG,+,0.00),55(CAGGTG,+,0.00),66(CAGGTG,+,0.00)
Merged-chr17-7906799-2	chr17	7906653	7906953		0(CAGGTG,+,0.00),18(CAGGTG,+,0.00),36(CAGGTG,+,0.00)
Merged-chr18-67348348-2	chr18	67348186	67348486		-127(CAGGTG,+,0.00),-92(CAGGTG,+,0.00),-81(CAGGTG,+,0.00),-46(CAGGTG,+,0.00),-35(CAGGTG,+,0.00),0(CAGGTG,+,0.00),46(CAGGTG,+,0.00),57(CAGGTG,+,0.00),92(CAGGTG,+,0.00),138(CAGGTG,+,0.00)	-104(CACCTG,+,0.00),34(CACCTG,+,0.00),80(CACCTG,+,0.00)
Merged-chr12-100003366-2	chr12	100003213	100003513	-71(CAGCTG,+,0.00),0(CAGCTG,+,0.00),32(CAGCTG,+,0.00)
Merged-chr3-36506520-2	chr3	36506371	36506671	20(CAGCTG,+,0.00)	0(CAGGTG,+,0.00)	-13(CACCTG,+,0.00)
Merged-chr6-38495834-2	chr6	38495684	38495984	-79(CAGCTG,+,0.00),0(CAGCTG,+,0.00)
Merged-chr16-10887671-2	chr16	10887522	10887822	-85(CAGCTG,+,0.00),-34(CAGCTG,+,0.00),-17(CAGCTG,+,0.00),0(CAGCTG,+,0.00),17(CAGCTG,+,0.00),34(CAGCTG,+,0.00),51(CAGCTG,+,0.00)
Merged-chr8-72590828-2	chr8	72590682	72590982		0(CAGGTG,+,0.00),13(CAGGTG,+,0.00),26(CAGGTG,+,0.00),39(CAGGTG,+,0.00),52(CAGGTG,+,0.00)	65(CACCTG,+,0.00)
Merged-chr1-132360960-2	chr1	132360807	132361107	45(CAGCTG,+,0.00)	-18(CAGGTG,+,0.00),0(CAGGTG,+,0.00)	-129(CACCTG,+,0.00)
Merged-chr10-41544670-2	chr10	41544521	41544821	-21(CAGCTG,+,0.00),0(CAGCTG,+,0.00)
Merged-chr1-88674585-2	chr1	88674436	88674736		0(CAGGTG,+,0.00)	-23(CACCTG,+,0.00),7(CACCTG,+,0.00)
Merged-chr17-15295543-1	chr17	15295401	15295701		-148(CAGGTG,+,0.00),-120(CAGGTG,+,0.00),-82(CAGGTG,+,0.00),-55(CAGGTG,+,0.00),-38(CAGGTG,+,0.00),0(CAGGTG,+,0.00),45(CAGGTG,+,0.00),103(CAGGTG,+,0.00)
Merged-chr11-69362207-2	chr11	69362060	69362360	-57(CAGCTG,+,0.00),-36(CAGCTG,+,0.00),0(CAGCTG,+,0.00)		-50(CACCTG,+,0.00)
Merged-chr11-5182141-2	chr11	5181979	5182279	-9(CAGCTG,+,0.00)	0(CAGGTG,+,0.00)	26(CACCTG,+,0.00)
Merged-chr7-142174918-2	chr7	142174757	142175057	-105(CAGCTG,+,0.00),-75(CAGCTG,+,0.00),-45(CAGCTG,+,0.00),-30(CAGCTG,+,0.00),0(CAGCTG,+,0.00),30(CAGCTG,+,0.00)
Merged-chr16-90082206-2	chr16	90082065	90082365		-143(CAGGTG,+,0.00),-129(CAGGTG,+,0.00),-115(CAGGTG,+,0.00),-97(CAGGTG,+,0.00),-69(CAGGTG,+,0.00),-55(CAGGTG,+,0.00),-41(CAGGTG,+,0.00),-27(CAGGTG,+,0.00),0(CAGGTG,+,0.00),14(CAGGTG,+,0.00),28(CAGGTG,+,0.00),42(CAGGTG,+,0.00),56(CAGGTG,+,0.00),70(CAGGTG,+,0.00),84(CAGGTG,+,0.00),98(CAGGTG,+,0.00),112(CAGGTG,+,0.00)
Merged-chr8-70408570-2	chr8	70408420	70408720	0(CAGCTG,+,0.00)	-9(CAGGTG,+,0.00)
Merged-chr4-104352136-2	chr4	104351984	104352284	-43(CAGCTG,+,0.00),0(CAGCTG,+,0.00),38(CAGCTG,+,0.00)		12(CACCTG,+,0.00)
Merged-chr6-29419176-1	chr6	29419042	29419342	-57(CAGCTG,+,0.00),0(CAGCTG,+,0.00),12(CAGCTG,+,0.00)
Merged-chr1-84694962-2	chr1	84694812	84695112	-19(CAGCTG,+,0.00),0(CAGCTG,+,0.00),141(CAGCTG,+,0.00)		-80(CACCTG,+,0.00)
Merged-chr1-89492467-2	chr1	89492320	89492620		-124(CAGGTG,+,0.00),-78(CAGGTG,+,0.00),-56(CAGGTG,+,0.00),-34(CAGGTG,+,0.00),0(CAGGTG,+,0.00),12(CAGGTG,+,0.00)
Merged-chr13-76003840-1	chr13	76003691	76003991	-24(CAGCTG,+,0.00),-12(CAGCTG,+,0.00),0(CAGCTG,+,0.00),15(CAGCTG,+,0.00),27(CAGCTG,+,0.00)		-45(CACCTG,+,0.00)
Merged-chr2-91309756-2	chr2	91309600	91309900	-125(CAGCTG,+,0.00),-47(CAGCTG,+,0.00),83(CAGCTG,+,0.00)	-58(CAGGTG,+,0.00),0(CAGGTG,+,0.00),39(CAGGTG,+,0.00)
Merged-chr9-117790470-2	chr9	117790322	117790622	-138(CAGCTG,+,0.00),-102(CAGCTG,+,0.00),-69(CAGCTG,+,0.00),-33(CAGCTG,+,0.00),0(CAGCTG,+,0.00)
Merged-chr11-117522042-1	chr11	117521903	117522203	0(CAGCTG,+,0.00)		14(CACCTG,+,0.00)
Merged-chr4-139089484-2	chr4	139089341	139089641	-17(CAGCTG,+,0.00)	0(CAGGTG,+,0.00)
Merged-chr2-165563533-2	chr2	165563369	165563669	-115(CAGCTG,+,0.00),61(CAGCTG,+,0.00)	0(CAGGTG,+,0.00)
Merged-chr15-36716545-2	chr15	36716395	36716695	0(CAGCTG,+,0.00),21(CAGCTG,+,0.00)	-24(CAGGTG,+,0.00)	116(CACCTG,+,0.00)
Merged-chr8-70429329-1	chr8	70429193	70429493		-31(CAGGTG,+,0.00),0(CAGGTG,+,0.00),30(CAGGTG,+,0.00),85(CAGGTG,+,0.00),105(CAGGTG,+,0.00),116(CAGGTG,+,0.00)
Merged-chr4-155780971-2	chr4	155780822	155781122	-90(CAGCTG,+,0.00),0(CAGCTG,+,0.00)
Merged-chr2-180472378-2	chr2	180472224	180472524	-52(CAGCTG,+,0.00)	0(CAGGTG,+,0.00)
Merged-chr11-49588798-2	chr11	49588655	49588955		-81(CAGGTG,+,0.00),-72(CAGGTG,+,0.00),0(CAGGTG,+,0.00),63(CAGGTG,+,0.00),75(CAGGTG,+,0.00)
Merged-chr7-45191881-1	chr7	45191721	45192021	29(CAGCTG,+,0.00)	0(CAGGTG,+,0.00),8(CAGGTG,+,0.00)
Merged-chr2-121101663-2	chr2	121101521	121101821		-8(CAGGTG,+,0.00),0(CAGGTG,+,0.00),16(CAGGTG,+,0.00),24(CAGGTG,+,0.00),32(CAGGTG,+,0.00),48(CAGGTG,+,0.00),72(CAGGTG,+,0.00),80(CAGGTG,+,0.00),88(CAGGTG,+,0.00),104(CAGGTG,+,0.00),112(CAGGTG,+,0.00),120(CAGGTG,+,0.00),136(CAGGTG,+,0.00),144(CAGGTG,+,0.00)
Merged-chr17-56194945-1	chr17	56194776	56195076	0(CAGCTG,+,0.00)	16(CAGGTG,+,0.00)
Merged-chr3-88144193-2	chr3	88144025	88144325		0(CAGGTG,+,0.00)
Merged-chr12-71886235-1	chr12	71886083	71886383	0(CAGCTG,+,0.00),18(CAGCTG,+,0.00),36(CAGCTG,+,0.00)
Merged-chr15-83673243-2	chr15	83673094	83673394		-72(CAGGTG,+,0.00),-60(CAGGTG,+,0.00),-48(CAGGTG,+,0.00),-36(CAGGTG,+,0.00),-24(CAGGTG,+,0.00),-12(CAGGTG,+,0.00),0(CAGGTG,+,0.00),12(CAGGTG,+,0.00),24(CAGGTG,+,0.00),36(CAGGTG,+,0.00),48(CAGGTG,+,0.00)
Merged-chr15-75981400-2	chr15	75981243	75981543	0(CAGCTG,+,0.00),21(CAGCTG,+,0.00)
Merged-chr1-185984965-2	chr1	185984812	185985112		0(CAGGTG,+,0.00),6(CAGGTG,+,0.00),36(CAGGTG,+,0.00),42(CAGGTG,+,0.00),56(CAGGTG,+,0.00),76(CAGGTG,+,0.00)
Merged-chr11-99602884-2	chr11	99602729	99603029	133(CAGCTG,+,0.00)	-26(CAGGTG,+,0.00),0(CAGGTG,+,0.00),24(CAGGTG,+,0.00),99(CAGGTG,+,0.00)
Merged-chr8-110488488-2	chr8	110488340	110488640	-29(CAGCTG,+,0.00),0(CAGCTG,+,0.00)	-17(CAGGTG,+,0.00)
Merged-chr11-102957097-2	chr11	102956952	102957252	-29(CAGCTG,+,0.00),0(CAGCTG,+,0.00)		-119(CACCTG,+,0.00)
Merged-chr11-100257529-1	chr11	100257396	100257696	0(CAGCTG,+,0.00),9(CAGCTG,+,0.00),51(CAGCTG,+,0.00)	119(CAGGTG,+,0.00)
Merged-chr1-134291070-1	chr1	134290940	134291240		0(CAGGTG,+,0.00)
Merged-chr11-117153800-2	chr11	117153648	117153948	-109(CAGCTG,+,0.00),0(CAGCTG,+,0.00),90(CAGCTG,+,0.00)		99(CACCTG,+,0.00)
Merged-chr4-63330426-1	chr4	63330288	63330588	0(CAGCTG,+,0.00),12(CAGCTG,+,0.00),91(CAGCTG,+,0.00)	-39(CAGGTG,+,0.00)
Merged-chr7-135405826-2	chr7	135405670	135405970	-24(CAGCTG,+,0.00),12(CAGCTG,+,0.00),48(CAGCTG,+,0.00),66(CAGCTG,+,0.00)	-36(CAGGTG,+,0.00),0(CAGGTG,+,0.00),18(CAGGTG,+,0.00),36(CAGGTG,+,0.00),54(CAGGTG,+,0.00),72(CAGGTG,+,0.00)
Merged-chr9-65823895-2	chr9	65823747	65824047	0(CAGCTG,+,0.00),8(CAGCTG,+,0.00)	30(CAGGTG,+,0.00)	-32(CACCTG,+,0.00)
Merged-chr7-111074089-1	chr7	111073921	111074221	-84(CAGCTG,+,0.00)	0(CAGGTG,+,0.00),48(CAGGTG,+,0.00)
Merged-chr4-156055408-2	chr4	156055245	156055545		0(CAGGTG,+,0.00),22(CAGGTG,+,0.00)	15(CACCTG,+,0.00)
Merged-chr8-124967258-2	chr8	124967133	124967433		-40(CAGGTG,+,0.00),-21(CAGGTG,+,0.00),0(CAGGTG,+,0.00),74(CAGGTG,+,0.00)
Merged-chr5-140857477-2	chr5	140857319	140857619	-90(CAGCTG,+,0.00)	-67(CAGGTG,+,0.00),0(CAGGTG,+,0.00)
Merged-chr4-11053928-2	chr4	11053801	11054101	-149(CAGCTG,+,0.00),-104(CAGCTG,+,0.00),-59(CAGCTG,+,0.00),-14(CAGCTG,+,0.00)	-135(CAGGTG,+,0.00),-90(CAGGTG,+,0.00),-45(CAGGTG,+,0.00),0(CAGGTG,+,0.00)
Merged-chr1-90405141-1	chr1	90405005	90405305		0(CAGGTG,+,0.00)	-54(CACCTG,+,0.00),125(CACCTG,+,0.00)
Merged-chr1-182953553-2	chr1	182953408	182953708	0(CAGCTG,+,0.00),13(CAGCTG,+,0.00)
Merged-chr11-102209903-2	chr11	102209757	102210057	10(CAGCTG,+,0.00)	0(CAGGTG,+,0.00)
Merged-chr15-79883093-1	chr15	79882958	79883258		0(CAGGTG,+,0.00)
Merged-chr9-58005877-2	chr9	58005709	58006009	0(CAGCTG,+,0.00)	57(CAGGTG,+,0.00)	-131(CACCTG,+,0.00)
Merged-chr3-108036039-2	chr3	108035895	108036195	-65(CAGCTG,+,0.00),-18(CAGCTG,+,0.00),0(CAGCTG,+,0.00)
Merged-chr10-77814790-2	chr10	77814641	77814941	-75(CAGCTG,+,0.00),-60(CAGCTG,+,0.00),-45(CAGCTG,+,0.00),-30(CAGCTG,+,0.00),-15(CAGCTG,+,0.00),0(CAGCTG,+,0.00)		50(CACCTG,+,0.00)
Merged-chr2-121770792-1	chr2	121770647	121770947	-23(CAGCTG,+,0.00),0(CAGCTG,+,0.00)	110(CAGGTG,+,0.00)	-45(CACCTG,+,0.00),-15(CACCTG,+,0.00)
Merged-chr15-88189552-2	chr15	88189397	88189697	-145(CAGCTG,+,0.00),-104(CAGCTG,+,0.00),-58(CAGCTG,+,0.00),-46(CAGCTG,+,0.00),-29(CAGCTG,+,0.00),-17(CAGCTG,+,0.00),0(CAGCTG,+,0.00),12(CAGCTG,+,0.00),29(CAGCTG,+,0.00),41(CAGCTG,+,0.00),86(CAGCTG,+,0.00)
Merged-chr11-61081741-1	chr11	61081595	61081895		-50(CAGGTG,+,0.00),-34(CAGGTG,+,0.00),-17(CAGGTG,+,0.00),0(CAGGTG,+,0.00),17(CAGGTG,+,0.00),34(CAGGTG,+,0.00),51(CAGGTG,+,0.00),68(CAGGTG,+,0.00),85(CAGGTG,+,0.00)	-79(CACCTG,+,0.00)
Merged-chr4-131060876-2	chr4	131060715	131061015	-94(CAGCTG,+,0.00),0(CAGCTG,+,0.00)		12(CACCTG,+,0.00),39(CACCTG,+,0.00)
Merged-chr11-78411439-2	chr11	78411294	78411594		-94(CAGGTG,+,0.00),-79(CAGGTG,+,0.00),-64(CAGGTG,+,0.00),-49(CAGGTG,+,0.00),-34(CAGGTG,+,0.00),-19(CAGGTG,+,0.00),0(CAGGTG,+,0.00),15(CAGGTG,+,0.00),34(CAGGTG,+,0.00),49(CAGGTG,+,0.00),64(CAGGTG,+,0.00)
Merged-chr10-111190792-2	chr10	111190635	111190935		-144(CAGGTG,+,0.00),-128(CAGGTG,+,0.00),-112(CAGGTG,+,0.00),-80(CAGGTG,+,0.00),-64(CAGGTG,+,0.00),-48(CAGGTG,+,0.00),-32(CAGGTG,+,0.00),-16(CAGGTG,+,0.00),0(CAGGTG,+,0.00),16(CAGGTG,+,0.00),32(CAGGTG,+,0.00),48(CAGGTG,+,0.00),64(CAGGTG,+,0.00),80(CAGGTG,+,0.00),96(CAGGTG,+,0.00),112(CAGGTG,+,0.00),128(CAGGTG,+,0.00),144(CAGGTG,+,0.00)
Merged-chr19-10362470-2	chr19	10362322	10362622	7(CAGCTG,+,0.00)	-11(CAGGTG,+,0.00),0(CAGGTG,+,0.00)	-20(CACCTG,+,0.00),72(CACCTG,+,0.00)
Merged-chr5-116525791-1	chr5	116525636	116525936	-61(CAGCTG,+,0.00)	0(CAGGTG,+,0.00)	-33(CACCTG,+,0.00)
Merged-chr4-130283052-2	chr4	130282899	130283199	-26(CAGCTG,+,0.00),-12(CAGCTG,+,0.00),26(CAGCTG,+,0.00)	0(CAGGTG,+,0.00)
Merged-chr3-100925341-2	chr3	100925194	100925494	-71(CAGCTG,+,0.00),0(CAGCTG,+,0.00),39(CAGCTG,+,0.00),54(CAGCTG,+,0.00),63(CAGCTG,+,0.00)
Merged-chr4-147416626-1	chr4	147416490	147416790	-46(CAGCTG,+,0.00)	0(CAGGTG,+,0.00)
Merged-chr5-122394055-2	chr5	122393904	122394204	7(CAGCTG,+,0.00)	0(CAGGTG,+,0.00)
Merged-chr7-80963800-2	chr7	80963642	80963942	0(CAGCTG,+,0.00),17(CAGCTG,+,0.00),29(CAGCTG,+,0.00)
Merged-chr5-24798071-1	chr5	24797925	24798225	-74(CAGCTG,+,0.00),0(CAGCTG,+,0.00),10(CAGCTG,+,0.00)	-99(CAGGTG,+,0.00),59(CAGGTG,+,0.00)	-64(CACCTG,+,0.00)
Merged-chr17-27037222-2	chr17	27037070	27037370	0(CAGCTG,+,0.00)	-69(CAGGTG,+,0.00)	28(CACCTG,+,0.00)
Merged-chr4-43795948-2	chr4	43795800	43796100		-28(CAGGTG,+,0.00),0(CAGGTG,+,0.00)
Merged-chr15-99420700-2	chr15	99420554	99420854	-109(CAGCTG,+,0.00),0(CAGCTG,+,0.00)
Merged-chr3-31975142-2	chr3	31974990	31975290	-8(CAGCTG,+,0.00),13(CAGCTG,+,0.00),34(CAGCTG,+,0.00)	-21(CAGGTG,+,0.00),0(CAGGTG,+,0.00),21(CAGGTG,+,0.00)
Merged-chr4-119395612-2	chr4	119395446	119395746		-138(CAGGTG,+,0.00),-128(CAGGTG,+,0.00),-98(CAGGTG,+,0.00),-81(CAGGTG,+,0.00),-44(CAGGTG,+,0.00),0(CAGGTG,+,0.00),20(CAGGTG,+,0.00),40(CAGGTG,+,0.00),90(CAGGTG,+,0.00),110(CAGGTG,+,0.00),137(CAGGTG,+,0.00)
Merged-chr1-191269036-2	chr1	191268891	191269191	0(CAGCTG,+,0.00)	-91(CAGGTG,+,0.00),-78(CAGGTG,+,0.00),-65(CAGGTG,+,0.00),-52(CAGGTG,+,0.00),-39(CAGGTG,+,0.00),-26(CAGGTG,+,0.00),-13(CAGGTG,+,0.00)
Merged-chr5-132712976-2	chr5	132712830	132713130		-70(CAGGTG,+,0.00),-57(CAGGTG,+,0.00),-44(CAGGTG,+,0.00),-26(CAGGTG,+,0.00),-13(CAGGTG,+,0.00),0(CAGGTG,+,0.00),13(CAGGTG,+,0.00),31(CAGGTG,+,0.00),44(CAGGTG,+,0.00),57(CAGGTG,+,0.00),70(CAGGTG,+,0.00),87(CAGGTG,+,0.00),105(CAGGTG,+,0.00)
Merged-chr17-29617276-2	chr17	29617121	29617421	0(CAGCTG,+,0.00)	-34(CAGGTG,+,0.00)	34(CACCTG,+,0.00)
Merged-chr5-118317641-2	chr5	118317494	118317794	0(CAGCTG,+,0.00)	-100(CAGGTG,+,0.00)	47(CACCTG,+,0.00)
Merged-chr11-74630055-1	chr11	74629930	74630230		0(CAGGTG,+,0.00)	-34(CACCTG,+,0.00),119(CACCTG,+,0.00)
Merged-chr11-4147256-2	chr11	4147121	4147421	0(CAGCTG,+,0.00),18(CAGCTG,+,0.00),38(CAGCTG,+,0.00),69(CAGCTG,+,0.00)		27(CACCTG,+,0.00)
Merged-chr9-118653870-2	chr9	118653736	118654036	0(CAGCTG,+,0.00)	27(CAGGTG,+,0.00)
Merged-chr2-107061734-2	chr2	107061591	107061891		-103(CAGGTG,+,0.00),-86(CAGGTG,+,0.00),-69(CAGGTG,+,0.00),-52(CAGGTG,+,0.00),-35(CAGGTG,+,0.00),-17(CAGGTG,+,0.00),0(CAGGTG,+,0.00),17(CAGGTG,+,0.00),35(CAGGTG,+,0.00),69(CAGGTG,+,0.00),86(CAGGTG,+,0.00),103(CAGGTG,+,0.00),121(CAGGTG,+,0.00)
Merged-chr3-96015862-2	chr3	96015710	96016010		-21(CAGGTG,+,0.00),-14(CAGGTG,+,0.00),0(CAGGTG,+,0.00),10(CAGGTG,+,0.00),24(CAGGTG,+,0.00)
Merged-chr1-68049954-2	chr1	68049804	68050104	0(CAGCTG,+,0.00),51(CAGCTG,+,0.00)	-9(CAGGTG,+,0.00)	-35(CACCTG,+,0.00),36(CACCTG,+,0.00)
Merged-chr15-38251210-1	chr15	38251055	38251355		-139(CAGGTG,+,0.00),-106(CAGGTG,+,0.00),-78(CAGGTG,+,0.00),-49(CAGGTG,+,0.00),-29(CAGGTG,+,0.00),0(CAGGTG,+,0.00),19(CAGGTG,+,0.00),47(CAGGTG,+,0.00),67(CAGGTG,+,0.00),91(CAGGTG,+,0.00),109(CAGGTG,+,0.00)
Merged-chr10-83056439-1	chr10	83056272	83056572	0(CAGCTG,+,0.00)	56(CAGGTG,+,0.00),67(CAGGTG,+,0.00)
Merged-chr14-118640977-2	chr14	118640830	118641130		-140(CAGGTG,+,0.00),-112(CAGGTG,+,0.00),-84(CAGGTG,+,0.00),-56(CAGGTG,+,0.00),-28(CAGGTG,+,0.00),0(CAGGTG,+,0.00),28(CAGGTG,+,0.00),56(CAGGTG,+,0.00),84(CAGGTG,+,0.00)
Merged-chr5-120976212-1	chr5	120976062	120976362	-65(CAGCTG,+,0.00),0(CAGCTG,+,0.00)	44(CAGGTG,+,0.00)
Merged-chr2-93035863-2	chr2	93035725	93036025	-31(CAGCTG,+,0.00),0(CAGCTG,+,0.00)	-93(CAGGTG,+,0.00)
Merged-chr6-97057667-2	chr6	97057522	97057822		0(CAGGTG,+,0.00),132(CAGGTG,+,0.00)
Merged-chr11-84570650-1	chr11	84570508	84570808	-122(CAGCTG,+,0.00),-27(CAGCTG,+,0.00)	0(CAGGTG,+,0.00)
Merged-chr5-135249187-2	chr5	135249037	135249337	0(CAGCTG,+,0.00),11(CAGCTG,+,0.00),19(CAGCTG,+,0.00)
Merged-chr15-100074919-1	chr15	100074791	100075091	-52(CAGCTG,+,0.00),-32(CAGCTG,+,0.00)	0(CAGGTG,+,0.00)
Merged-chr1-93194635-2	chr1	93194463	93194763		-51(CAGGTG,+,0.00),-9(CAGGTG,+,0.00),0(CAGGTG,+,0.00)	-84(CACCTG,+,0.00)
Merged-chr7-30289851-2	chr7	30289703	30290003	0(CAGCTG,+,0.00),12(CAGCTG,+,0.00),30(CAGCTG,+,0.00)	-92(CAGGTG,+,0.00)
Merged-chr18-67329385-1	chr18	67329241	67329541	-101(CAGCTG,+,0.00)	0(CAGGTG,+,0.00),136(CAGGTG,+,0.00)	-124(CACCTG,+,0.00),122(CACCTG,+,0.00)
Merged-chr17-68937752-1	chr17	68937603	68937903	0(CAGCTG,+,0.00)		6(CACCTG,+,0.00),39(CACCTG,+,0.00),45(CACCTG,+,0.00),51(CACCTG,+,0.00),57(CACCTG,+,0.00),63(CACCTG,+,0.00),69(CACCTG,+,0.00),75(CACCTG,+,0.00),81(CACCTG,+,0.00),87(CACCTG,+,0.00),93(CACCTG,+,0.00),99(CACCTG,+,0.00),105(CACCTG,+,0.00),111(CACCTG,+,0.00),144(CACCTG,+,0.00)
Merged-chr11-101131936-2	chr11	101131785	101132085	0(CAGCTG,+,0.00),53(CAGCTG,+,0.00)
Merged-chr13-56671446-2	chr13	56671281	56671581	-50(CAGCTG,+,0.00),0(CAGCTG,+,0.00),16(CAGCTG,+,0.00)
Merged-chr5-100751808-1	chr5	100751655	100751955	-21(CAGCTG,+,0.00)	0(CAGGTG,+,0.00)
Merged-chr9-104356132-2	chr9	104355982	104356282	6(CAGCTG,+,0.00),12(CAGCTG,+,0.00)	-117(CAGGTG,+,0.00),0(CAGGTG,+,0.00)
Merged-chr16-94698884-1	chr16	94698725	94699025	-145(CAGCTG,+,0.00),-116(CAGCTG,+,0.00),-87(CAGCTG,+,0.00),-58(CAGCTG,+,0.00),-29(CAGCTG,+,0.00),0(CAGCTG,+,0.00),29(CAGCTG,+,0.00),58(CAGCTG,+,0.00),87(CAGCTG,+,0.00),116(CAGCTG,+,0.00),145(CAGCTG,+,0.00)
Merged-chr2-32422310-2	chr2	32422158	32422458	-27(CAGCTG,+,0.00),-12(CAGCTG,+,0.00),0(CAGCTG,+,0.00)
Merged-chr6-34515659-2	chr6	34515509	34515809	0(CAGCTG,+,0.00),26(CAGCTG,+,0.00),62(CAGCTG,+,0.00)
Merged-chr10-95271125-2	chr10	95270967	95271267		-62(CAGGTG,+,0.00),-45(CAGGTG,+,0.00),-31(CAGGTG,+,0.00),0(CAGGTG,+,0.00),17(CAGGTG,+,0.00),31(CAGGTG,+,0.00),48(CAGGTG,+,0.00),62(CAGGTG,+,0.00),79(CAGGTG,+,0.00)
Merged-chr19-29999443-1	chr19	29999294	29999594	0(CAGCTG,+,0.00)	-51(CAGGTG,+,0.00)	-11(CACCTG,+,0.00)
Merged-chr13-55484744-2	chr13	55484607	55484907	0(CAGCTG,+,0.00),17(CAGCTG,+,0.00)	-56(CAGGTG,+,0.00)	29(CACCTG,+,0.00)
Merged-chr16-31510262-1	chr16	31510115	31510415	0(CAGCTG,+,0.00)		17(CACCTG,+,0.00)
Merged-chr4-147122498-1	chr4	147122354	147122654		0(CAGGTG,+,0.00)	59(CACCTG,+,0.00)
Merged-chr6-91843209-1	chr6	91843043	91843343	16(CAGCTG,+,0.00)	0(CAGGTG,+,0.00)	83(CACCTG,+,0.00)
Merged-chr1-176975087-2	chr1	176974941	176975241		-149(CAGGTG,+,0.00),-130(CAGGTG,+,0.00),-111(CAGGTG,+,0.00),-92(CAGGTG,+,0.00),-74(CAGGTG,+,0.00),-18(CAGGTG,+,0.00),0(CAGGTG,+,0.00),18(CAGGTG,+,0.00),37(CAGGTG,+,0.00),56(CAGGTG,+,0.00),74(CAGGTG,+,0.00),92(CAGGTG,+,0.00)
Merged-chr13-64226985-2	chr13	64226849	64227149		0(CAGGTG,+,0.00),92(CAGGTG,+,0.00),117(CAGGTG,+,0.00)	-56(CACCTG,+,0.00)
Merged-chr4-133093619-1	chr4	133093469	133093769	0(CAGCTG,+,0.00),18(CAGCTG,+,0.00)		-60(CACCTG,+,0.00)
Merged-chr16-95684602-1	chr16	95684460	95684760	0(CAGCTG,+,0.00)		-25(CACCTG,+,0.00)
Merged-chr16-52083320-1	chr16	52083166	52083466		-88(CAGGTG,+,0.00),-66(CAGGTG,+,0.00),-44(CAGGTG,+,0.00),-22(CAGGTG,+,0.00),0(CAGGTG,+,0.00),22(CAGGTG,+,0.00),44(CAGGTG,+,0.00),66(CAGGTG,+,0.00),88(CAGGTG,+,0.00),132(CAGGTG,+,0.00)
Merged-chr4-139615044-2	chr4	139614909	139615209	-131(CAGCTG,+,0.00)	0(CAGGTG,+,0.00)
Merged-chr11-99897624-2	chr11	99897469	99897769	-65(CAGCTG,+,0.00),-42(CAGCTG,+,0.00)	-95(CAGGTG,+,0.00),-15(CAGGTG,+,0.00),0(CAGGTG,+,0.00)	114(CACCTG,+,0.00)
Merged-chr11-102206674-1	chr11	102206519	102206819	0(CAGCTG,+,0.00),112(CAGCTG,+,0.00)
Merged-chr14-7752781-2	chr14	7752637	7752937		0(CAGGTG,+,0.00)
Merged-chr4-116819608-2	chr4	116819454	116819754	0(CAGCTG,+,0.00),13(CAGCTG,+,0.00)	-112(CAGGTG,+,0.00)	-121(CACCTG,+,0.00)
Merged-chr15-78388999-1	chr15	78388855	78389155		0(CAGGTG,+,0.00)
Merged-chr2-58711731-1	chr2	58711578	58711878	-18(CAGCTG,+,0.00),0(CAGCTG,+,0.00),13(CAGCTG,+,0.00)
Merged-chr3-34819680-1	chr3	34819512	34819812	-13(CAGCTG,+,0.00)	0(CAGGTG,+,0.00),94(CAGGTG,+,0.00)	-24(CACCTG,+,0.00)
Merged-chr10-77847704-1	chr10	77847552	77847852		-133(CAGGTG,+,0.00),-112(CAGGTG,+,0.00),-57(CAGGTG,+,0.00),-19(CAGGTG,+,0.00),0(CAGGTG,+,0.00),19(CAGGTG,+,0.00),38(CAGGTG,+,0.00),70(CAGGTG,+,0.00)
Merged-chr2-26300296-2	chr2	26300152	26300452	0(CAGCTG,+,0.00),25(CAGCTG,+,0.00)		-36(CACCTG,+,0.00)
Merged-chr13-114171281-2	chr13	114171124	114171424	-66(CAGCTG,+,0.00),-44(CAGCTG,+,0.00),-22(CAGCTG,+,0.00),0(CAGCTG,+,0.00),22(CAGCTG,+,0.00),44(CAGCTG,+,0.00)
Merged-chr2-71344407-2	chr2	71344252	71344552	0(CAGCTG,+,0.00)
Merged-chr16-97488473-2	chr16	97488311	97488611	-31(CAGCTG,+,0.00),0(CAGCTG,+,0.00),58(CAGCTG,+,0.00)		-50(CACCTG,+,0.00)
Merged-chr17-35824595-1	chr17	35824450	35824750	0(CAGCTG,+,0.00)	-37(CAGGTG,+,0.00)
Merged-chr10-62241926-2	chr10	62241768	62242068	0(CAGCTG,+,0.00)	-38(CAGGTG,+,0.00)
Merged-chr10-122300311-2	chr10	122300169	122300469		-136(CAGGTG,+,0.00),-119(CAGGTG,+,0.00),-102(CAGGTG,+,0.00),-85(CAGGTG,+,0.00),-68(CAGGTG,+,0.00),-51(CAGGTG,+,0.00),-34(CAGGTG,+,0.00),-17(CAGGTG,+,0.00),0(CAGGTG,+,0.00),17(CAGGTG,+,0.00),34(CAGGTG,+,0.00),51(CAGGTG,+,0.00)
Merged-chr8-125271565-1	chr8	125271413	125271713	0(CAGCTG,+,0.00)	13(CAGGTG,+,0.00)	-43(CACCTG,+,0.00)
Merged-chr8-71526788-2	chr8	71526657	71526957	-135(CAGCTG,+,0.00)	0(CAGGTG,+,0.00)
Merged-chr11-70737917-2	chr11	70737771	70738071	31(CAGCTG,+,0.00)	-65(CAGGTG,+,0.00),0(CAGGTG,+,0.00)
Merged-chr13-113678389-2	chr13	113678252	113678552		0(CAGGTG,+,0.00)
Merged-chr9-121932718-1	chr9	121932574	121932874		-24(CAGGTG,+,0.00),-12(CAGGTG,+,0.00),0(CAGGTG,+,0.00),12(CAGGTG,+,0.00),24(CAGGTG,+,0.00),36(CAGGTG,+,0.00),51(CAGGTG,+,0.00),63(CAGGTG,+,0.00),75(CAGGTG,+,0.00),90(CAGGTG,+,0.00)
Merged-chr8-75025897-1	chr8	75025754	75026054	0(CAGCTG,+,0.00)	89(CAGGTG,+,0.00)
Merged-chr7-43775935-2	chr7	43775798	43776098	-48(CAGCTG,+,0.00),-35(CAGCTG,+,0.00),0(CAGCTG,+,0.00)	-94(CAGGTG,+,0.00)
Merged-chr17-29627197-2	chr17	29627058	29627358	-42(CAGCTG,+,0.00),0(CAGCTG,+,0.00)
Merged-chr1-161097165-1	chr1	161097024	161097324		-66(CAGGTG,+,0.00),-33(CAGGTG,+,0.00),0(CAGGTG,+,0.00),33(CAGGTG,+,0.00),66(CAGGTG,+,0.00),99(CAGGTG,+,0.00),132(CAGGTG,+,0.00)	-45(CACCTG,+,0.00),21(CACCTG,+,0.00),54(CACCTG,+,0.00),87(CACCTG,+,0.00),120(CACCTG,+,0.00)
Merged-chr4-106989086-1	chr4	106988928	106989228	-122(CAGCTG,+,0.00),0(CAGCTG,+,0.00)	-62(CAGGTG,+,0.00)	92(CACCTG,+,0.00)
Merged-chr2-28538101-1	chr2	28537951	28538251	79(CAGCTG,+,0.00)	0(CAGGTG,+,0.00),15(CAGGTG,+,0.00),55(CAGGTG,+,0.00)	-146(CACCTG,+,0.00),100(CACCTG,+,0.00)
Merged-chr2-167095585-2	chr2	167095432	167095732	-81(CAGCTG,+,0.00),77(CAGCTG,+,0.00),97(CAGCTG,+,0.00)	0(CAGGTG,+,0.00)
Merged-chr3-95989096-1	chr3	95988956	95989256	0(CAGCTG,+,0.00),138(CAGCTG,+,0.00)
Merged-chr9-43659339-2	chr9	43659187	43659487	0(CAGCTG,+,0.00)
Merged-chr19-53748883-1	chr19	53748728	53749028		-65(CAGGTG,+,0.00),-43(CAGGTG,+,0.00),-21(CAGGTG,+,0.00),0(CAGGTG,+,0.00),21(CAGGTG,+,0.00),42(CAGGTG,+,0.00)	119(CACCTG,+,0.00)
Merged-chr4-84223021-2	chr4	84222878	84223178		0(CAGGTG,+,0.00)	131(CACCTG,+,0.00)
Merged-chr11-118349616-2	chr11	118349450	118349750		0(CAGGTG,+,0.00),127(CAGGTG,+,0.00)	41(CACCTG,+,0.00)
Merged-chr16-94699264-1	chr16	94699125	94699425	-144(CAGCTG,+,0.00),-116(CAGCTG,+,0.00),-87(CAGCTG,+,0.00),-58(CAGCTG,+,0.00),-29(CAGCTG,+,0.00),0(CAGCTG,+,0.00),29(CAGCTG,+,0.00)
Merged-chr2-38992152-1	chr2	38991994	38992294	0(CAGCTG,+,0.00),72(CAGCTG,+,0.00)	-63(CAGGTG,+,0.00)	-43(CACCTG,+,0.00),37(CACCTG,+,0.00)
Merged-chr8-13337493-2	chr8	13337342	13337642	-55(CAGCTG,+,0.00),0(CAGCTG,+,0.00)
Merged-chr5-53110303-2	chr5	53110139	53110439		-51(CAGGTG,+,0.00),0(CAGGTG,+,0.00)	-91(CACCTG,+,0.00),72(CACCTG,+,0.00)
Merged-chr3-54679004-2	chr3	54678861	54679161	-126(CAGCTG,+,0.00),-63(CAGCTG,+,0.00),-42(CAGCTG,+,0.00),-21(CAGCTG,+,0.00),0(CAGCTG,+,0.00),21(CAGCTG,+,0.00),42(CAGCTG,+,0.00)
Merged-chr2-25035102-2	chr2	25034935	25035235	-49(CAGCTG,+,0.00),-13(CAGCTG,+,0.00),95(CAGCTG,+,0.00),131(CAGCTG,+,0.00)	-72(CAGGTG,+,0.00),-36(CAGGTG,+,0.00),0(CAGGTG,+,0.00),36(CAGGTG,+,0.00),72(CAGGTG,+,0.00),108(CAGGTG,+,0.00)
Merged-chr17-29081434-2	chr17	29081267	29081567	0(CAGCTG,+,0.00)
Merged-chr1-131179136-2	chr1	131178986	131179286	-120(CAGCTG,+,0.00),-82(CAGCTG,+,0.00),-44(CAGCTG,+,0.00),-6(CAGCTG,+,0.00),0(CAGCTG,+,0.00),32(CAGCTG,+,0.00),70(CAGCTG,+,0.00),108(CAGCTG,+,0.00)	-132(CAGGTG,+,0.00),-94(CAGGTG,+,0.00),-56(CAGGTG,+,0.00),-18(CAGGTG,+,0.00),20(CAGGTG,+,0.00),58(CAGGTG,+,0.00),96(CAGGTG,+,0.00),134(CAGGTG,+,0.00)
Merged-chr10-42170277-1	chr10	42170134	42170434	0(CAGCTG,+,0.00)		-37(CACCTG,+,0.00)
Merged-chr15-101397109-2	chr15	101396956	101397256	-52(CAGCTG,+,0.00),-26(CAGCTG,+,0.00),0(CAGCTG,+,0.00),26(CAGCTG,+,0.00)	89(CAGGTG,+,0.00)	-40(CACCTG,+,0.00),-14(CACCTG,+,0.00),12(CACCTG,+,0.00)
Merged-chr17-24769319-1	chr17	24769162	24769462	-34(CAGCTG,+,0.00),0(CAGCTG,+,0.00),66(CAGCTG,+,0.00)	31(CAGGTG,+,0.00)
Merged-chr17-46852699-1	chr17	46852561	46852861	0(CAGCTG,+,0.00),20(CAGCTG,+,0.00)
Merged-chr2-126871540-2	chr2	126871393	126871693	-48(CAGCTG,+,0.00),23(CAGCTG,+,0.00)	0(CAGGTG,+,0.00)
Merged-chr2-32302864-1	chr2	32302693	32302993	-74(CAGCTG,+,0.00),50(CAGCTG,+,0.00)	-53(CAGGTG,+,0.00),0(CAGGTG,+,0.00),77(CAGGTG,+,0.00)
Merged-chr19-25647038-2	chr19	25646871	25647171		0(CAGGTG,+,0.00)	32(CACCTG,+,0.00)
Merged-chr4-116995951-2	chr4	116995800	116996100	0(CAGCTG,+,0.00)		12(CACCTG,+,0.00),105(CACCTG,+,0.00)
Merged-chr19-53768533-2	chr19	53768386	53768686	68(CAGCTG,+,0.00)	0(CAGGTG,+,0.00)
Merged-chr19-5810824-1	chr19	5810665	5810965	-31(CAGCTG,+,0.00),0(CAGCTG,+,0.00),142(CAGCTG,+,0.00)
Merged-chr4-133263093-2	chr4	133262942	133263242	0(CAGCTG,+,0.00),122(CAGCTG,+,0.00)	-146(CAGGTG,+,0.00)
Merged-chr16-52084105-2	chr16	52083954	52084254		-132(CAGGTG,+,0.00),-88(CAGGTG,+,0.00),-66(CAGGTG,+,0.00),-44(CAGGTG,+,0.00),-22(CAGGTG,+,0.00),0(CAGGTG,+,0.00),22(CAGGTG,+,0.00),44(CAGGTG,+,0.00),66(CAGGTG,+,0.00),110(CAGGTG,+,0.00),132(CAGGTG,+,0.00)
Merged-chr8-119586245-2	chr8	119586077	119586377		0(CAGGTG,+,0.00)
Merged-chr7-68812653-2	chr7	68812499	68812799		-75(CAGGTG,+,0.00),-60(CAGGTG,+,0.00),-45(CAGGTG,+,0.00),-30(CAGGTG,+,0.00),-15(CAGGTG,+,0.00),0(CAGGTG,+,0.00),15(CAGGTG,+,0.00),30(CAGGTG,+,0.00),45(CAGGTG,+,0.00),75(CAGGTG,+,0.00),91(CAGGTG,+,0.00),106(CAGGTG,+,0.00)
Merged-chr18-11892431-2	chr18	11892282	11892582	0(CAGCTG,+,0.00),15(CAGCTG,+,0.00),29(CAGCTG,+,0.00),44(CAGCTG,+,0.00),74(CAGCTG,+,0.00),89(CAGCTG,+,0.00),104(CAGCTG,+,0.00),119(CAGCTG,+,0.00),134(CAGCTG,+,0.00)
Merged-chr4-63436822-2	chr4	63436663	63436963	-49(CAGCTG,+,0.00)	-119(CAGGTG,+,0.00),-35(CAGGTG,+,0.00),0(CAGGTG,+,0.00),68(CAGGTG,+,0.00)
Merged-chr19-3930520-2	chr19	3930365	3930665	0(CAGCTG,+,0.00)	38(CAGGTG,+,0.00)	-105(CACCTG,+,0.00),73(CACCTG,+,0.00)
Merged-chr13-34746794-2	chr13	34746651	34746951	0(CAGCTG,+,0.00),18(CAGCTG,+,0.00),39(CAGCTG,+,0.00)
Merged-chr18-34535843-1	chr18	34535688	34535988	31(CAGCTG,+,0.00)	0(CAGGTG,+,0.00)	-96(CACCTG,+,0.00),-54(CACCTG,+,0.00)
Merged-chr18-68235209-2	chr18	68235049	68235349	0(CAGCTG,+,0.00)		15(CACCTG,+,0.00)
Merged-chr12-86498546-2	chr12	86498388	86498688		0(CAGGTG,+,0.00)
Merged-chr7-142251155-1	chr7	142250999	142251299	-84(CAGCTG,+,0.00),-63(CAGCTG,+,0.00),-42(CAGCTG,+,0.00),0(CAGCTG,+,0.00),48(CAGCTG,+,0.00),84(CAGCTG,+,0.00),114(CAGCTG,+,0.00),144(CAGCTG,+,0.00)
Merged-chr14-33548432-2	chr14	33548281	33548581	0(CAGCTG,+,0.00)	-16(CAGGTG,+,0.00),139(CAGGTG,+,0.00)	44(CACCTG,+,0.00)
Merged-chr8-83698651-1	chr8	83698498	83698798		-135(CAGGTG,+,0.00),0(CAGGTG,+,0.00)	-9(CACCTG,+,0.00),12(CACCTG,+,0.00)
Merged-chr4-119939940-2	chr4	119939803	119940103		0(CAGGTG,+,0.00)	41(CACCTG,+,0.00)
Merged-chr5-134152122-1	chr5	134151959	134152259	-133(CAGCTG,+,0.00),-115(CAGCTG,+,0.00)	-31(CAGGTG,+,0.00),0(CAGGTG,+,0.00)
Merged-chr1-190161521-2	chr1	190161373	190161673	-57(CAGCTG,+,0.00),-12(CAGCTG,+,0.00),0(CAGCTG,+,0.00),21(CAGCTG,+,0.00),30(CAGCTG,+,0.00)
Merged-chr16-10328204-2	chr16	10328072	10328372		0(CAGGTG,+,0.00)
Merged-chr18-61698077-1	chr18	61697926	61698226	-22(CAGCTG,+,0.00),0(CAGCTG,+,0.00)
Merged-chr2-154581654-1	chr2	154581505	154581805	0(CAGCTG,+,0.00)
Merged-chr3-52831283-2	chr3	52831124	52831424		-58(CAGGTG,+,0.00),-29(CAGGTG,+,0.00),0(CAGGTG,+,0.00),29(CAGGTG,+,0.00),58(CAGGTG,+,0.00),86(CAGGTG,+,0.00),115(CAGGTG,+,0.00)	-41(CACCTG,+,0.00),-12(CACCTG,+,0.00),17(CACCTG,+,0.00),46(CACCTG,+,0.00),75(CACCTG,+,0.00),103(CACCTG,+,0.00),132(CACCTG,+,0.00)
Merged-chr4-107429576-2	chr4	107429423	107429723		-16(CAGGTG,+,0.00),0(CAGGTG,+,0.00),16(CAGGTG,+,0.00),32(CAGGTG,+,0.00),48(CAGGTG,+,0.00),64(CAGGTG,+,0.00)
Merged-chr5-113376706-1	chr5	113376576	113376876		0(CAGGTG,+,0.00)
Merged-chr14-32095835-2	chr14	32095690	32095990		-50(CAGGTG,+,0.00),0(CAGGTG,+,0.00),130(CAGGTG,+,0.00)
Merged-chr6-83853540-1	chr6	83853388	83853688	0(CAGCTG,+,0.00),31(CAGCTG,+,0.00)
Merged-chr8-20330176-2	chr8	20330004	20330304		0(CAGGTG,+,0.00)
Merged-chr9-43441206-1	chr9	43441042	43441342	-61(CAGCTG,+,0.00)	0(CAGGTG,+,0.00)
Merged-chr15-8279448-1	chr15	8279289	8279589	0(CAGCTG,+,0.00)
Merged-chr10-61009314-2	chr10	61009173	61009473	-37(CAGCTG,+,0.00),37(CAGCTG,+,0.00)	-148(CAGGTG,+,0.00),-111(CAGGTG,+,0.00),-91(CAGGTG,+,0.00),-73(CAGGTG,+,0.00),-54(CAGGTG,+,0.00),-18(CAGGTG,+,0.00),0(CAGGTG,+,0.00),19(CAGGTG,+,0.00)	138(CACCTG,+,0.00)
Merged-chr10-79921177-1	chr10	79921021	79921321	145(CAGCTG,+,0.00)	-31(CAGGTG,+,0.00),0(CAGGTG,+,0.00)	-79(CACCTG,+,0.00)
Merged-chr10-77799019-2	chr10	77798877	77799177	-72(CAGCTG,+,0.00)	0(CAGGTG,+,0.00),93(CAGGTG,+,0.00)
Merged-chr10-60801584-2	chr10	60801422	60801722	0(CAGCTG,+,0.00),36(CAGCTG,+,0.00)
Merged-chr2-18955256-2	chr2	18955110	18955410	-14(CAGCTG,+,0.00),0(CAGCTG,+,0.00)
Merged-chr7-142257860-2	chr7	142257704	142258004	-147(CAGCTG,+,0.00),-114(CAGCTG,+,0.00),-66(CAGCTG,+,0.00),-30(CAGCTG,+,0.00),0(CAGCTG,+,0.00),84(CAGCTG,+,0.00),114(CAGCTG,+,0.00)
Merged-chr17-28777913-1	chr17	28777763	28778063		-48(CAGGTG,+,0.00),-32(CAGGTG,+,0.00),0(CAGGTG,+,0.00),48(CAGGTG,+,0.00),80(CAGGTG,+,0.00),112(CAGGTG,+,0.00)
Merged-chr13-20188394-2	chr13	20188252	20188552	0(CAGCTG,+,0.00)		17(CACCTG,+,0.00)
Merged-chr10-81366456-2	chr10	81366304	81366604	-54(CAGCTG,+,0.00)	0(CAGGTG,+,0.00)	-76(CACCTG,+,0.00)
Merged-chr9-107570482-1	chr9	107570329	107570629	-144(CAGCTG,+,0.00)	0(CAGGTG,+,0.00)
Merged-chr1-185879264-2	chr1	185879112	185879412	-29(CAGCTG,+,0.00),0(CAGCTG,+,0.00)	-43(CAGGTG,+,0.00),-17(CAGGTG,+,0.00),12(CAGGTG,+,0.00)	-55(CACCTG,+,0.00)
Merged-chr11-118376601-2	chr11	118376452	118376752		-106(CAGGTG,+,0.00),-74(CAGGTG,+,0.00),-32(CAGGTG,+,0.00),0(CAGGTG,+,0.00),42(CAGGTG,+,0.00),78(CAGGTG,+,0.00)	-118(CACCTG,+,0.00),-86(CACCTG,+,0.00),-44(CACCTG,+,0.00),-12(CACCTG,+,0.00),30(CACCTG,+,0.00),66(CACCTG,+,0.00)
Merged-chr8-3428601-1	chr8	3428459	3428759	-147(CAGCTG,+,0.00),0(CAGCTG,+,0.00),38(CAGCTG,+,0.00),76(CAGCTG,+,0.00)
Merged-chr15-100770609-2	chr15	100770440	100770740	0(CAGCTG,+,0.00),12(CAGCTG,+,0.00),24(CAGCTG,+,0.00),36(CAGCTG,+,0.00),48(CAGCTG,+,0.00)		-143(CACCTG,+,0.00)
Merged-chr10-81544850-1	chr10	81544696	81544996	0(CAGCTG,+,0.00)
Merged-chr17-31790999-1	chr17	31790832	31791132	-128(CAGCTG,+,0.00),-69(CAGCTG,+,0.00),0(CAGCTG,+,0.00),18(CAGCTG,+,0.00),96(CAGCTG,+,0.00)
Merged-chr4-142205283-2	chr4	142205155	142205455		0(CAGGTG,+,0.00),48(CAGGTG,+,0.00)
Merged-chr1-134443511-1	chr1	134443378	134443678	0(CAGCTG,+,0.00)		-40(CACCTG,+,0.00)
Merged-chr11-46041351-2	chr11	46041186	46041486	0(CAGCTG,+,0.00),17(CAGCTG,+,0.00)
Merged-chr17-49368458-1	chr17	49368308	49368608		0(CAGGTG,+,0.00),16(CAGGTG,+,0.00)	-26(CACCTG,+,0.00)
Merged-chr6-127503380-1	chr6	127503238	127503538		-59(CAGGTG,+,0.00),-51(CAGGTG,+,0.00),-34(CAGGTG,+,0.00),-17(CAGGTG,+,0.00),0(CAGGTG,+,0.00),17(CAGGTG,+,0.00),34(CAGGTG,+,0.00),51(CAGGTG,+,0.00),68(CAGGTG,+,0.00),85(CAGGTG,+,0.00),102(CAGGTG,+,0.00),136(CAGGTG,+,0.00)
Merged-chr11-98849473-2	chr11	98849311	98849611	-96(CAGCTG,+,0.00),84(CAGCTG,+,0.00)	0(CAGGTG,+,0.00)	-133(CACCTG,+,0.00)
Merged-chr1-9997863-2	chr1	9997708	9998008	-122(CAGCTG,+,0.00),26(CAGCTG,+,0.00),47(CAGCTG,+,0.00)	0(CAGGTG,+,0.00)	-23(CACCTG,+,0.00)
Merged-chr9-29536613-2	chr9	29536471	29536771		0(CAGGTG,+,0.00)	-21(CACCTG,+,0.00),27(CACCTG,+,0.00)
Merged-chr15-82968618-1	chr15	82968484	82968784	20(CAGCTG,+,0.00)	0(CAGGTG,+,0.00)
Merged-chr4-44984454-1	chr4	44984303	44984603		0(CAGGTG,+,0.00),116(CAGGTG,+,0.00)	52(CACCTG,+,0.00)
Merged-chr9-97642316-1	chr9	97642174	97642474		0(CAGGTG,+,0.00)	-14(CACCTG,+,0.00),144(CACCTG,+,0.00)
Merged-chr2-26547643-2	chr2	26547490	26547790	0(CAGCTG,+,0.00)	-25(CAGGTG,+,0.00)
Merged-chr13-48944728-1	chr13	48944595	48944895	20(CAGCTG,+,0.00)	0(CAGGTG,+,0.00)	9(CACCTG,+,0.00),56(CACCTG,+,0.00)
Merged-chr17-73054398-1	chr17	73054248	73054548	0(CAGCTG,+,0.00),11(CAGCTG,+,0.00)		-20(CACCTG,+,0.00)

## Sheet: MYOD1_open
PeakID	Chr	Start	End	CAGCTG Distance From Peak(sequence,strand,conservation)	CAGGTG Distance From Peak(sequence,strand,conservation)	CACCTG Distance From Peak(sequence,strand,conservation)
Merged-chr19-46518730-2	chr19	46518578	46518878	-36(CAGCTG,+,0.00),-25(CAGCTG,+,0.00),0(CAGCTG,+,0.00),38(CAGCTG,+,0.00)
Merged-chr2-78189772-2	chr2	78189609	78189909	-139(CAGCTG,+,0.00),-108(CAGCTG,+,0.00),-47(CAGCTG,+,0.00),0(CAGCTG,+,0.00),13(CAGCTG,+,0.00)		74(CACCTG,+,0.00)
Merged-chr8-120528444-2	chr8	120528299	120528599	-18(CAGCTG,+,0.00)	0(CAGGTG,+,0.00),36(CAGGTG,+,0.00),64(CAGGTG,+,0.00)	-85(CACCTG,+,0.00)
Merged-chr9-94659805-2	chr9	94659647	94659947		-105(CAGGTG,+,0.00),-75(CAGGTG,+,0.00),-43(CAGGTG,+,0.00),0(CAGGTG,+,0.00),55(CAGGTG,+,0.00),88(CAGGTG,+,0.00),135(CAGGTG,+,0.00)
Merged-chr1-36580245-2	chr1	36580095	36580395	-33(CAGCTG,+,0.00),0(CAGCTG,+,0.00)	16(CAGGTG,+,0.00),47(CAGGTG,+,0.00)	-52(CACCTG,+,0.00),129(CACCTG,+,0.00)
Merged-chr13-107679000-2	chr13	107678849	107679149	0(CAGCTG,+,0.00),24(CAGCTG,+,0.00)	12(CAGGTG,+,0.00)	59(CACCTG,+,0.00)
Merged-chr2-152804497-2	chr2	152804339	152804639	-147(CAGCTG,+,0.00),0(CAGCTG,+,0.00),30(CAGCTG,+,0.00)	-42(CAGGTG,+,0.00)	-63(CACCTG,+,0.00)
Merged-chr8-81353587-2	chr8	81353451	81353751		-33(CAGGTG,+,0.00),0(CAGGTG,+,0.00),33(CAGGTG,+,0.00),66(CAGGTG,+,0.00)
Merged-chr17-29056894-2	chr17	29056745	29057045	-53(CAGCTG,+,0.00),0(CAGCTG,+,0.00),28(CAGCTG,+,0.00)	-90(CAGGTG,+,0.00)
Merged-chr6-113852552-1	chr6	113852419	113852719		0(CAGGTG,+,0.00)
Merged-chr10-99132397-2	chr10	99132244	99132544	-51(CAGCTG,+,0.00),21(CAGCTG,+,0.00),47(CAGCTG,+,0.00)	0(CAGGTG,+,0.00)
Merged-chr3-144643754-2	chr3	144643604	144643904	-49(CAGCTG,+,0.00),0(CAGCTG,+,0.00),63(CAGCTG,+,0.00)
Merged-chr2-103302954-2	chr2	103302802	103303102	0(CAGCTG,+,0.00),74(CAGCTG,+,0.00)	-21(CAGGTG,+,0.00)	-59(CACCTG,+,0.00)
Merged-chr7-75914209-2	chr7	75914041	75914341	-55(CAGCTG,+,0.00),-43(CAGCTG,+,0.00),0(CAGCTG,+,0.00)
Merged-chr5-147293397-2	chr5	147293247	147293547	-13(CAGCTG,+,0.00),0(CAGCTG,+,0.00)		-61(CACCTG,+,0.00)
Merged-chr11-55810912-1	chr11	55810748	55811048	0(CAGCTG,+,0.00)	89(CAGGTG,+,0.00)
Merged-chr2-167540324-2	chr2	167540174	167540474	42(CAGCTG,+,0.00)	0(CAGGTG,+,0.00)	26(CACCTG,+,0.00)
Merged-chr13-51920717-2	chr13	51920561	51920861	-26(CAGCTG,+,0.00),0(CAGCTG,+,0.00),135(CAGCTG,+,0.00)
Merged-chr9-37054341-2	chr9	37054191	37054491	-11(CAGCTG,+,0.00),0(CAGCTG,+,0.00)
Merged-chr7-100009860-2	chr7	100009715	100010015	0(CAGCTG,+,0.00),17(CAGCTG,+,0.00)		26(CACCTG,+,0.00)
Merged-chr11-79593711-2	chr11	79593575	79593875	-74(CAGCTG,+,0.00),0(CAGCTG,+,0.00)
Merged-chr11-96929357-2	chr11	96929206	96929506	0(CAGCTG,+,0.00)		-24(CACCTG,+,0.00),-11(CACCTG,+,0.00),77(CACCTG,+,0.00)
Merged-chr15-52967984-2	chr15	52967836	52968136	-30(CAGCTG,+,0.00),0(CAGCTG,+,0.00),18(CAGCTG,+,0.00)
Merged-chr3-117010385-2	chr3	117010225	117010525		0(CAGGTG,+,0.00),82(CAGGTG,+,0.00)	-82(CACCTG,+,0.00),-30(CACCTG,+,0.00)
Merged-chr6-55108545-1	chr6	55108401	55108701	68(CAGCTG,+,0.00),92(CAGCTG,+,0.00)	-110(CAGGTG,+,0.00),0(CAGGTG,+,0.00)
Merged-chr17-45602187-2	chr17	45602038	45602338	0(CAGCTG,+,0.00),32(CAGCTG,+,0.00)		14(CACCTG,+,0.00)
Merged-chrX-83486966-2	chrX	83486817	83487117	-120(CAGCTG,+,0.00),-66(CAGCTG,+,0.00),-57(CAGCTG,+,0.00),0(CAGCTG,+,0.00)	-42(CAGGTG,+,0.00),-33(CAGGTG,+,0.00),-15(CAGGTG,+,0.00),-6(CAGGTG,+,0.00),12(CAGGTG,+,0.00),21(CAGGTG,+,0.00),30(CAGGTG,+,0.00),48(CAGGTG,+,0.00),66(CAGGTG,+,0.00),75(CAGGTG,+,0.00),84(CAGGTG,+,0.00),102(CAGGTG,+,0.00)
Merged-chr2-179193866-1	chr2	179193705	179194005	0(CAGCTG,+,0.00)
Merged-chr16-95093927-1	chr16	95093765	95094065	-48(CAGCTG,+,0.00),0(CAGCTG,+,0.00)
Merged-chr2-178603579-2	chr2	178603427	178603727	0(CAGCTG,+,0.00)	-54(CAGGTG,+,0.00),20(CAGGTG,+,0.00),40(CAGGTG,+,0.00)
Merged-chr11-68556064-2	chr11	68555922	68556222		-20(CAGGTG,+,0.00),0(CAGGTG,+,0.00),22(CAGGTG,+,0.00)	-79(CACCTG,+,0.00)
Merged-chr14-24254051-2	chr14	24253907	24254207	-101(CAGCTG,+,0.00),0(CAGCTG,+,0.00),11(CAGCTG,+,0.00)
Merged-chr13-3642212-2	chr13	3642076	3642376	-96(CAGCTG,+,0.00),0(CAGCTG,+,0.00),13(CAGCTG,+,0.00)	24(CAGGTG,+,0.00)
Merged-chr16-14004402-2	chr16	14004251	14004551	-34(CAGCTG,+,0.00),-17(CAGCTG,+,0.00),0(CAGCTG,+,0.00),17(CAGCTG,+,0.00)
Merged-chr9-65109604-2	chr9	65109456	65109756	0(CAGCTG,+,0.00)
Merged-chr12-81776368-1	chr12	81776224	81776524	0(CAGCTG,+,0.00)
Merged-chr9-61293381-2	chr9	61293219	61293519		-28(CAGGTG,+,0.00),0(CAGGTG,+,0.00)
Merged-chr2-68364312-2	chr2	68364147	68364447	-53(CAGCTG,+,0.00),0(CAGCTG,+,0.00),10(CAGCTG,+,0.00)	-32(CAGGTG,+,0.00)
Merged-chr9-75683932-1	chr9	75683782	75684082		-8(CAGGTG,+,0.00),0(CAGGTG,+,0.00)
Merged-chr9-74366183-2	chr9	74366031	74366331	-40(CAGCTG,+,0.00),0(CAGCTG,+,0.00),27(CAGCTG,+,0.00)	-26(CAGGTG,+,0.00)	-59(CACCTG,+,0.00),126(CACCTG,+,0.00)
Merged-chr11-65713098-1	chr11	65712952	65713252	-86(CAGCTG,+,0.00),0(CAGCTG,+,0.00)	117(CAGGTG,+,0.00)	51(CACCTG,+,0.00)
Merged-chr4-13300347-2	chr4	13300177	13300477	-61(CAGCTG,+,0.00),82(CAGCTG,+,0.00)	0(CAGGTG,+,0.00)
Merged-chr2-92948057-2	chr2	92947908	92948208	0(CAGCTG,+,0.00),6(CAGCTG,+,0.00),57(CAGCTG,+,0.00)
Merged-chr19-47328097-2	chr19	47327964	47328264	-137(CAGCTG,+,0.00),0(CAGCTG,+,0.00)	-86(CAGGTG,+,0.00)
Merged-chr1-54485091-2	chr1	54484956	54485256	-37(CAGCTG,+,0.00),0(CAGCTG,+,0.00)
Merged-chr17-16218794-2	chr17	16218631	16218931	-86(CAGCTG,+,0.00),-60(CAGCTG,+,0.00),0(CAGCTG,+,0.00)	-40(CAGGTG,+,0.00)
Merged-chr17-79364854-2	chr17	79364701	79365001		0(CAGGTG,+,0.00),40(CAGGTG,+,0.00)
Merged-chr9-94670489-2	chr9	94670337	94670637	-51(CAGCTG,+,0.00),0(CAGCTG,+,0.00)
Merged-chr1-87327519-2	chr1	87327369	87327669	0(CAGCTG,+,0.00),17(CAGCTG,+,0.00)		45(CACCTG,+,0.00)
Merged-chr5-128439984-2	chr5	128439819	128440119	0(CAGCTG,+,0.00),13(CAGCTG,+,0.00)	-121(CAGGTG,+,0.00)	-53(CACCTG,+,0.00)
Merged-chr12-40917598-2	chr12	40917458	40917758	-15(CAGCTG,+,0.00)	0(CAGGTG,+,0.00),81(CAGGTG,+,0.00)	-127(CACCTG,+,0.00),74(CACCTG,+,0.00)
Merged-chr17-15372050-2	chr17	15371909	15372209	-28(CAGCTG,+,0.00),0(CAGCTG,+,0.00),28(CAGCTG,+,0.00)
Merged-chr2-163481811-2	chr2	163481646	163481946	0(CAGCTG,+,0.00),57(CAGCTG,+,0.00),141(CAGCTG,+,0.00)	18(CAGGTG,+,0.00)
Merged-chr1-190448419-2	chr1	190448270	190448570		-38(CAGGTG,+,0.00),0(CAGGTG,+,0.00),11(CAGGTG,+,0.00)
Merged-chr12-25475623-2	chr12	25475485	25475785	0(CAGCTG,+,0.00)	-26(CAGGTG,+,0.00)
Merged-chr18-42740812-2	chr18	42740657	42740957	-56(CAGCTG,+,0.00),0(CAGCTG,+,0.00)	-25(CAGGTG,+,0.00),26(CAGGTG,+,0.00)
Merged-chr2-30942964-2	chr2	30942807	30943107		0(CAGGTG,+,0.00)
Merged-chr10-67549623-2	chr10	67549477	67549777	0(CAGCTG,+,0.00),10(CAGCTG,+,0.00)
Merged-chr4-80912116-2	chr4	80911959	80912259	-36(CAGCTG,+,0.00),0(CAGCTG,+,0.00),6(CAGCTG,+,0.00),81(CAGCTG,+,0.00)		-115(CACCTG,+,0.00)
Merged-chr7-3423529-2	chr7	3423382	3423682		0(CAGGTG,+,0.00)
Merged-chr18-82477423-2	chr18	82477275	82477575	-18(CAGCTG,+,0.00)	0(CAGGTG,+,0.00)
Merged-chr9-57148432-2	chr9	57148288	57148588	-85(CAGCTG,+,0.00),0(CAGCTG,+,0.00)	21(CAGGTG,+,0.00)
Merged-chr16-88701141-2	chr16	88701009	88701309	0(CAGCTG,+,0.00)	12(CAGGTG,+,0.00)
Merged-chr9-21337759-1	chr9	21337608	21337908	0(CAGCTG,+,0.00),95(CAGCTG,+,0.00)
Merged-chr10-13641954-2	chr10	13641807	13642107		-36(CAGGTG,+,0.00),0(CAGGTG,+,0.00),15(CAGGTG,+,0.00)
Merged-chr14-122267736-2	chr14	122267575	122267875		-56(CAGGTG,+,0.00),0(CAGGTG,+,0.00),70(CAGGTG,+,0.00)	-45(CACCTG,+,0.00)
Merged-chr11-101334689-2	chr11	101334540	101334840	-41(CAGCTG,+,0.00),0(CAGCTG,+,0.00)
Merged-chr12-44344305-2	chr12	44344174	44344474	0(CAGCTG,+,0.00),42(CAGCTG,+,0.00)		-72(CACCTG,+,0.00)
Merged-chr2-104572896-2	chr2	104572745	104573045	-92(CAGCTG,+,0.00)	0(CAGGTG,+,0.00)
Merged-chr11-11855210-2	chr11	11855065	11855365		0(CAGGTG,+,0.00),16(CAGGTG,+,0.00)
Merged-chr7-81212373-2	chr7	81212229	81212529	20(CAGCTG,+,0.00)	0(CAGGTG,+,0.00)
Merged-chr15-103215365-2	chr15	103215216	103215516	0(CAGCTG,+,0.00),22(CAGCTG,+,0.00)
Merged-chr1-55363818-2	chr1	55363678	55363978		0(CAGGTG,+,0.00)
Merged-chr15-75748487-2	chr15	75748336	75748636	-24(CAGCTG,+,0.00),0(CAGCTG,+,0.00)	-107(CAGGTG,+,0.00)
Merged-chr2-152816506-2	chr2	152816339	152816639	-43(CAGCTG,+,0.00),86(CAGCTG,+,0.00)	0(CAGGTG,+,0.00)
Merged-chr6-97048667-2	chr6	97048532	97048832	35(CAGCTG,+,0.00),54(CAGCTG,+,0.00)	0(CAGGTG,+,0.00)
Merged-chr1-193036109-1	chr1	193035934	193036234		0(CAGGTG,+,0.00)
Merged-chr7-107708683-2	chr7	107708519	107708819	0(CAGCTG,+,0.00)
Merged-chr2-154427982-2	chr2	154427834	154428134	-82(CAGCTG,+,0.00),0(CAGCTG,+,0.00)	33(CAGGTG,+,0.00)	8(CACCTG,+,0.00)
Merged-chr19-7057822-2	chr19	7057667	7057967	0(CAGCTG,+,0.00)
Merged-chr3-129918598-2	chr3	129918451	129918751	0(CAGCTG,+,0.00)	12(CAGGTG,+,0.00)	-18(CACCTG,+,0.00)
Merged-chr4-62262410-2	chr4	62262273	62262573		-55(CAGGTG,+,0.00),0(CAGGTG,+,0.00)	87(CACCTG,+,0.00)
Merged-chr11-88689871-2	chr11	88689714	88690014	-51(CAGCTG,+,0.00),0(CAGCTG,+,0.00)
Merged-chr17-79355928-2	chr17	79355758	79356058	0(CAGCTG,+,0.00)	-48(CAGGTG,+,0.00),-42(CAGGTG,+,0.00)
Merged-chr9-102690227-2	chr9	102690101	102690401		0(CAGGTG,+,0.00)
Merged-chr10-8287522-2	chr10	8287372	8287672	-123(CAGCTG,+,0.00),-47(CAGCTG,+,0.00),0(CAGCTG,+,0.00)	7(CAGGTG,+,0.00)	-80(CACCTG,+,0.00),25(CACCTG,+,0.00)
Merged-chr7-16004642-2	chr7	16004474	16004774	15(CAGCTG,+,0.00)	0(CAGGTG,+,0.00)
Merged-chr10-77197567-2	chr10	77197411	77197711	-39(CAGCTG,+,0.00),0(CAGCTG,+,0.00)
Merged-chr8-89003544-2	chr8	89003390	89003690	-18(CAGCTG,+,0.00),0(CAGCTG,+,0.00)	-124(CAGGTG,+,0.00)
Merged-chr5-120588645-1	chr5	120588489	120588789	0(CAGCTG,+,0.00)
Merged-chr5-92042529-2	chr5	92042389	92042689	-16(CAGCTG,+,0.00)	0(CAGGTG,+,0.00)
Merged-chr5-81519589-2	chr5	81519433	81519733	-66(CAGCTG,+,0.00),0(CAGCTG,+,0.00),20(CAGCTG,+,0.00)
Merged-chr10-37102870-1	chr10	37102724	37103024	-141(CAGCTG,+,0.00),0(CAGCTG,+,0.00),19(CAGCTG,+,0.00)
Merged-chr17-52601437-2	chr17	52601307	52601607		-41(CAGGTG,+,0.00),0(CAGGTG,+,0.00),61(CAGGTG,+,0.00)
Merged-chr2-125134289-2	chr2	125134147	125134447	0(CAGCTG,+,0.00),101(CAGCTG,+,0.00)
Merged-chr12-86466392-2	chr12	86466262	86466562	13(CAGCTG,+,0.00)	0(CAGGTG,+,0.00)
Merged-chr17-67996333-2	chr17	67996191	67996491	-63(CAGCTG,+,0.00),0(CAGCTG,+,0.00)
Merged-chr5-105415999-2	chr5	105415848	105416148		-35(CAGGTG,+,0.00),0(CAGGTG,+,0.00)	-22(CACCTG,+,0.00),25(CACCTG,+,0.00),43(CACCTG,+,0.00)
Merged-chr2-105263420-2	chr2	105263264	105263564	0(CAGCTG,+,0.00)	30(CAGGTG,+,0.00)
Merged-chr13-3712726-2	chr13	3712574	3712874	0(CAGCTG,+,0.00)		-46(CACCTG,+,0.00)
Merged-chr6-116671220-2	chr6	116671086	116671386	-106(CAGCTG,+,0.00),0(CAGCTG,+,0.00),120(CAGCTG,+,0.00)		-150(CACCTG,+,0.00)
Merged-chr7-127935614-2	chr7	127935475	127935775	0(CAGCTG,+,0.00),12(CAGCTG,+,0.00)
Merged-chr18-20802081-1	chr18	20801928	20802228	0(CAGCTG,+,0.00)		-28(CACCTG,+,0.00)
Merged-chr3-55227013-2	chr3	55226850	55227150	-46(CAGCTG,+,0.00)	0(CAGGTG,+,0.00)
Merged-chrX-143543394-2	chrX	143543245	143543545	-69(CAGCTG,+,0.00),126(CAGCTG,+,0.00)	0(CAGGTG,+,0.00)
Merged-chr8-78147586-2	chr8	78147441	78147741	0(CAGCTG,+,0.00),76(CAGCTG,+,0.00)		-54(CACCTG,+,0.00)
Merged-chr4-153806383-1	chr4	153806247	153806547		0(CAGGTG,+,0.00),17(CAGGTG,+,0.00)
Merged-chr4-5690624-2	chr4	5690486	5690786	-32(CAGCTG,+,0.00)	0(CAGGTG,+,0.00)
Merged-chr7-130237059-2	chr7	130236909	130237209	0(CAGCTG,+,0.00),14(CAGCTG,+,0.00)	-16(CAGGTG,+,0.00),144(CAGGTG,+,0.00)
Merged-chr11-115258314-2	chr11	115258170	115258470	-30(CAGCTG,+,0.00),-6(CAGCTG,+,0.00)	0(CAGGTG,+,0.00)
Merged-chr7-30973689-2	chr7	30973538	30973838	-123(CAGCTG,+,0.00)	-30(CAGGTG,+,0.00),0(CAGGTG,+,0.00),68(CAGGTG,+,0.00)
Merged-chr5-134006890-1	chr5	134006734	134007034	-43(CAGCTG,+,0.00),0(CAGCTG,+,0.00)
Merged-chr17-32162749-2	chr17	32162602	32162902	-10(CAGCTG,+,0.00)	0(CAGGTG,+,0.00),35(CAGGTG,+,0.00)
Merged-chr10-122033464-2	chr10	122033324	122033624	-80(CAGCTG,+,0.00),-35(CAGCTG,+,0.00),25(CAGCTG,+,0.00)	-102(CAGGTG,+,0.00),0(CAGGTG,+,0.00),64(CAGGTG,+,0.00)
Merged-chr2-113829101-2	chr2	113828964	113829264		0(CAGGTG,+,0.00)	-139(CACCTG,+,0.00)
Merged-chr13-31292759-2	chr13	31292594	31292894	-143(CAGCTG,+,0.00),0(CAGCTG,+,0.00)	-88(CAGGTG,+,0.00),-44(CAGGTG,+,0.00)
Merged-chr13-20600441-2	chr13	20600292	20600592	0(CAGCTG,+,0.00)		-124(CACCTG,+,0.00)
Merged-chr9-20831086-2	chr9	20830936	20831236	0(CAGCTG,+,0.00)
Merged-chr11-9132025-2	chr11	9131884	9132184	-102(CAGCTG,+,0.00),0(CAGCTG,+,0.00)
Merged-chr11-86051626-2	chr11	86051474	86051774	0(CAGCTG,+,0.00)		80(CACCTG,+,0.00)
Merged-chr1-118459194-1	chr1	118459035	118459335		0(CAGGTG,+,0.00)
Merged-chr7-127104665-1	chr7	127104516	127104816	0(CAGCTG,+,0.00)	-26(CAGGTG,+,0.00)
Merged-chr6-97517901-2	chr6	97517774	97518074	91(CAGCTG,+,0.00)	0(CAGGTG,+,0.00)
Merged-chr4-44028467-2	chr4	44028297	44028597		0(CAGGTG,+,0.00),44(CAGGTG,+,0.00)
Merged-chr12-111664547-2	chr12	111664393	111664693	28(CAGCTG,+,0.00)	0(CAGGTG,+,0.00)
Merged-chr18-43687795-2	chr18	43687663	43687963	0(CAGCTG,+,0.00)
Merged-chr8-106135240-2	chr8	106135093	106135393		0(CAGGTG,+,0.00),62(CAGGTG,+,0.00)	-21(CACCTG,+,0.00),79(CACCTG,+,0.00)
Merged-chr16-18724889-2	chr16	18724742	18725042	0(CAGCTG,+,0.00)	-78(CAGGTG,+,0.00)
Merged-chr5-61160360-2	chr5	61160202	61160502		0(CAGGTG,+,0.00)
Merged-chr11-114795434-2	chr11	114795298	114795598	-49(CAGCTG,+,0.00),0(CAGCTG,+,0.00),61(CAGCTG,+,0.00)
Merged-chr16-97286921-1	chr16	97286766	97287066	-73(CAGCTG,+,0.00),0(CAGCTG,+,0.00)
Merged-chr16-9281029-2	chr16	9280896	9281196	0(CAGCTG,+,0.00)	65(CAGGTG,+,0.00)
Merged-chr19-47019522-2	chr19	47019389	47019689	-53(CAGCTG,+,0.00),0(CAGCTG,+,0.00)
Merged-chr11-40050690-2	chr11	40050552	40050852		0(CAGGTG,+,0.00),31(CAGGTG,+,0.00)
Merged-chr13-91461154-2	chr13	91461000	91461300		0(CAGGTG,+,0.00)
Merged-chr2-38976572-2	chr2	38976428	38976728	-47(CAGCTG,+,0.00),0(CAGCTG,+,0.00),33(CAGCTG,+,0.00)	45(CAGGTG,+,0.00)
Merged-chr9-58061069-1	chr9	58060913	58061213	0(CAGCTG,+,0.00)
Merged-chr15-9213260-2	chr15	9213105	9213405		0(CAGGTG,+,0.00)	131(CACCTG,+,0.00)
Merged-chr9-8035787-2	chr9	8035652	8035952	-75(CAGCTG,+,0.00),0(CAGCTG,+,0.00)
Merged-chr2-105616652-1	chr2	105616500	105616800	0(CAGCTG,+,0.00)	130(CAGGTG,+,0.00)
Merged-chr8-107425117-2	chr8	107424965	107425265	0(CAGCTG,+,0.00)
Merged-chr8-110217984-2	chr8	110217834	110218134		0(CAGGTG,+,0.00)
Merged-chr5-38656465-2	chr5	38656300	38656600		0(CAGGTG,+,0.00),18(CAGGTG,+,0.00)
Merged-chr14-73325243-2	chr14	73325081	73325381		-42(CAGGTG,+,0.00),0(CAGGTG,+,0.00)
Merged-chr13-82064074-2	chr13	82063922	82064222	41(CAGCTG,+,0.00)	0(CAGGTG,+,0.00)
Merged-chr8-122523232-2	chr8	122523084	122523384	0(CAGCTG,+,0.00)
Merged-chr4-55203928-2	chr4	55203760	55204060		-110(CAGGTG,+,0.00),0(CAGGTG,+,0.00)	-63(CACCTG,+,0.00)
Merged-chr14-45507253-1	chr14	45507121	45507421	-74(CAGCTG,+,0.00),0(CAGCTG,+,0.00)		-43(CACCTG,+,0.00)
Merged-chr7-16944524-2	chr7	16944377	16944677	-48(CAGCTG,+,0.00),-18(CAGCTG,+,0.00)	0(CAGGTG,+,0.00)
Merged-chr6-4685056-1	chr6	4684902	4685202	0(CAGCTG,+,0.00),122(CAGCTG,+,0.00)	-111(CAGGTG,+,0.00)	-18(CACCTG,+,0.00)
Merged-chr3-33991086-1	chr3	33990920	33991220	-73(CAGCTG,+,0.00),0(CAGCTG,+,0.00)	53(CAGGTG,+,0.00)	-114(CACCTG,+,0.00)
Merged-chr16-35491015-2	chr16	35490857	35491157	0(CAGCTG,+,0.00)
Merged-chr3-18695629-1	chr3	18695488	18695788	0(CAGCTG,+,0.00)
Merged-chr3-98024500-2	chr3	98024335	98024635		0(CAGGTG,+,0.00)
Merged-chr11-88758581-2	chr11	88758429	88758729		0(CAGGTG,+,0.00)
Merged-chr4-125652007-2	chr4	125651839	125652139	10(CAGCTG,+,0.00)	0(CAGGTG,+,0.00),74(CAGGTG,+,0.00)
Merged-chr15-44716165-2	chr15	44716020	44716320		-12(CAGGTG,+,0.00),0(CAGGTG,+,0.00),12(CAGGTG,+,0.00),37(CAGGTG,+,0.00),49(CAGGTG,+,0.00),61(CAGGTG,+,0.00),86(CAGGTG,+,0.00),98(CAGGTG,+,0.00),110(CAGGTG,+,0.00)
Merged-chr1-11416604-2	chr1	11416442	11416742		0(CAGGTG,+,0.00),15(CAGGTG,+,0.00)
Merged-chr19-56874351-2	chr19	56874194	56874494	0(CAGCTG,+,0.00)		68(CACCTG,+,0.00)
Merged-chr3-146404504-2	chr3	146404355	146404655	0(CAGCTG,+,0.00)	-15(CAGGTG,+,0.00)	-148(CACCTG,+,0.00)
Merged-chr10-25314303-1	chr10	25314147	25314447		-39(CAGGTG,+,0.00),0(CAGGTG,+,0.00)
Merged-chr13-54216154-2	chr13	54216004	54216304	0(CAGCTG,+,0.00)	-62(CAGGTG,+,0.00)
Merged-chr6-122764969-2	chr6	122764819	122765119		-22(CAGGTG,+,0.00),0(CAGGTG,+,0.00)
Merged-chr9-98726760-1	chr9	98726630	98726930	0(CAGCTG,+,0.00),137(CAGCTG,+,0.00)
Merged-chr8-123515425-2	chr8	123515277	123515577	0(CAGCTG,+,0.00)		-49(CACCTG,+,0.00)
Merged-chr11-117404022-2	chr11	117403886	117404186	-90(CAGCTG,+,0.00),0(CAGCTG,+,0.00)	20(CAGGTG,+,0.00)
Merged-chr1-167598494-2	chr1	167598340	167598640	0(CAGCTG,+,0.00)
Merged-chr10-81037221-2	chr10	81037091	81037391		0(CAGGTG,+,0.00)
Merged-chr12-25098791-2	chr12	25098623	25098923	-43(CAGCTG,+,0.00)	0(CAGGTG,+,0.00)
Merged-chr2-58532420-2	chr2	58532276	58532576	0(CAGCTG,+,0.00)
Merged-chr1-9747901-1	chr1	9747764	9748064	0(CAGCTG,+,0.00)
Merged-chr1-7313679-2	chr1	7313534	7313834	-26(CAGCTG,+,0.00),0(CAGCTG,+,0.00)
Merged-chr14-78289015-2	chr14	78288864	78289164	0(CAGCTG,+,0.00)		31(CACCTG,+,0.00)
Merged-chr3-144720279-2	chr3	144720139	144720439	-100(CAGCTG,+,0.00),0(CAGCTG,+,0.00)
Merged-chr12-26068331-2	chr12	26068190	26068490	-46(CAGCTG,+,0.00),0(CAGCTG,+,0.00),87(CAGCTG,+,0.00)
Merged-chr6-136471081-2	chr6	136470938	136471238	0(CAGCTG,+,0.00)
Merged-chr13-98890302-2	chr13	98890128	98890428		0(CAGGTG,+,0.00)
Merged-chr17-47521839-2	chr17	47521691	47521991	0(CAGCTG,+,0.00),25(CAGCTG,+,0.00)
Merged-chr7-112743900-1	chr7	112743755	112744055	0(CAGCTG,+,0.00)
Merged-chr12-54835069-2	chr12	54834929	54835229	-98(CAGCTG,+,0.00),0(CAGCTG,+,0.00)
Merged-chr12-28817594-2	chr12	28817439	28817739	0(CAGCTG,+,0.00),61(CAGCTG,+,0.00)
Merged-chr14-68935023-2	chr14	68934878	68935178	-30(CAGCTG,+,0.00),0(CAGCTG,+,0.00)		63(CACCTG,+,0.00)
Merged-chr4-105224067-2	chr4	105223898	105224198	0(CAGCTG,+,0.00)
Merged-chr6-70964163-2	chr6	70964018	70964318		0(CAGGTG,+,0.00)
Merged-chr10-118122082-2	chr10	118121923	118122223		0(CAGGTG,+,0.00)
Merged-chr3-83129826-1	chr3	83129680	83129980		0(CAGGTG,+,0.00)	-115(CACCTG,+,0.00),-61(CACCTG,+,0.00)
Merged-chr3-152944904-2	chr3	152944747	152945047	-47(CAGCTG,+,0.00),-37(CAGCTG,+,0.00),0(CAGCTG,+,0.00)	-103(CAGGTG,+,0.00),111(CAGGTG,+,0.00)
Merged-chr13-112001342-2	chr13	112001185	112001485	0(CAGCTG,+,0.00)		-54(CACCTG,+,0.00)
Merged-chr12-26315192-2	chr12	26315038	26315338	0(CAGCTG,+,0.00)		-22(CACCTG,+,0.00)
Merged-chr8-8612235-2	chr8	8612085	8612385		0(CAGGTG,+,0.00)
Merged-chr3-84040257-1	chr3	84040100	84040400	0(CAGCTG,+,0.00)
Merged-chr3-89090939-1	chr3	89090779	89091079		0(CAGGTG,+,0.00)
Merged-chr15-77863282-2	chr15	77863120	77863420	0(CAGCTG,+,0.00),83(CAGCTG,+,0.00)
Merged-chr10-110854981-2	chr10	110854835	110855135		0(CAGGTG,+,0.00)
Merged-chr18-18058812-2	chr18	18058673	18058973		0(CAGGTG,+,0.00)
Merged-chr17-9917242-2	chr17	9917098	9917398		0(CAGGTG,+,0.00),44(CAGGTG,+,0.00)
Merged-chr7-102065150-2	chr7	102065015	102065315	0(CAGCTG,+,0.00)
Merged-chr6-118066666-2	chr6	118066517	118066817	0(CAGCTG,+,0.00)		-32(CACCTG,+,0.00)
Merged-chr15-25762456-2	chr15	25762309	25762609	0(CAGCTG,+,0.00)	12(CAGGTG,+,0.00)	-115(CACCTG,+,0.00)
Merged-chr9-12930462-2	chr9	12930315	12930615	0(CAGCTG,+,0.00),12(CAGCTG,+,0.00)		-30(CACCTG,+,0.00)
Merged-chr1-177441868-2	chr1	177441715	177442015	0(CAGCTG,+,0.00)	112(CAGGTG,+,0.00)
Merged-chr12-29096192-2	chr12	29096027	29096327	0(CAGCTG,+,0.00)
Merged-chr11-76287449-2	chr11	76287296	76287596	0(CAGCTG,+,0.00)		63(CACCTG,+,0.00)
Merged-chr8-114116266-2	chr8	114116136	114116436	0(CAGCTG,+,0.00),47(CAGCTG,+,0.00)
Merged-chr4-126248744-1	chr4	126248604	126248904		0(CAGGTG,+,0.00)
Merged-chr13-46418340-2	chr13	46418195	46418495	0(CAGCTG,+,0.00),13(CAGCTG,+,0.00)	42(CAGGTG,+,0.00)
Merged-chr16-87435522-2	chr16	87435362	87435662		0(CAGGTG,+,0.00)
Merged-chr11-117438536-2	chr11	117438395	117438695	-50(CAGCTG,+,0.00),0(CAGCTG,+,0.00)	25(CAGGTG,+,0.00)
Merged-chr2-101665564-2	chr2	101665401	101665701	0(CAGCTG,+,0.00)	-47(CAGGTG,+,0.00)
Merged-chr9-111487362-1	chr9	111487211	111487511	0(CAGCTG,+,0.00),24(CAGCTG,+,0.00)	-71(CAGGTG,+,0.00)
Merged-chr5-12847271-2	chr5	12847113	12847413		-28(CAGGTG,+,0.00),0(CAGGTG,+,0.00)
Merged-chr12-100998171-2	chr12	100998041	100998341	115(CAGCTG,+,0.00)	0(CAGGTG,+,0.00)
Merged-chr10-47631720-2	chr10	47631572	47631872	-26(CAGCTG,+,0.00)	0(CAGGTG,+,0.00)	88(CACCTG,+,0.00)
Merged-chr3-90224573-2	chr3	90224407	90224707		0(CAGGTG,+,0.00)
Merged-chr10-8297443-2	chr10	8297295	8297595	0(CAGCTG,+,0.00)	25(CAGGTG,+,0.00)	103(CACCTG,+,0.00)
Merged-chr15-98114684-2	chr15	98114541	98114841		0(CAGGTG,+,0.00)
Merged-chr11-116853757-1	chr11	116853588	116853888	-54(CAGCTG,+,0.00),0(CAGCTG,+,0.00)
Merged-chr11-20145591-2	chr11	20145433	20145733		0(CAGGTG,+,0.00),45(CAGGTG,+,0.00)
Merged-chr10-25708199-2	chr10	25708043	25708343	0(CAGCTG,+,0.00)	-79(CAGGTG,+,0.00)	69(CACCTG,+,0.00)
Merged-chr5-147076893-2	chr5	147076724	147077024	-44(CAGCTG,+,0.00),46(CAGCTG,+,0.00)	0(CAGGTG,+,0.00),82(CAGGTG,+,0.00)	103(CACCTG,+,0.00)
Merged-chr11-5741373-2	chr11	5741230	5741530	0(CAGCTG,+,0.00)		-35(CACCTG,+,0.00)
Merged-chr17-15380916-2	chr17	15380763	15381063	0(CAGCTG,+,0.00)
Merged-chr4-118019478-1	chr4	118019323	118019623		0(CAGGTG,+,0.00)	133(CACCTG,+,0.00)
Merged-chr13-115089371-2	chr13	115089208	115089508	-149(CAGCTG,+,0.00)	0(CAGGTG,+,0.00)
Merged-chr1-84869057-2	chr1	84868901	84869201	0(CAGCTG,+,0.00),12(CAGCTG,+,0.00)	24(CAGGTG,+,0.00)
Merged-chr7-62419445-2	chr7	62419275	62419575	-54(CAGCTG,+,0.00)	0(CAGGTG,+,0.00)
Merged-chr13-100616772-2	chr13	100616610	100616910		0(CAGGTG,+,0.00)
Merged-chr4-121241520-2	chr4	121241356	121241656	0(CAGCTG,+,0.00),16(CAGCTG,+,0.00)
Merged-chr13-79867766-1	chr13	79867612	79867912		0(CAGGTG,+,0.00),28(CAGGTG,+,0.00)
Merged-chr13-95018166-2	chr13	95018028	95018328	0(CAGCTG,+,0.00),7(CAGCTG,+,0.00)	25(CAGGTG,+,0.00)
Merged-chr5-72444098-1	chr5	72443963	72444263	0(CAGCTG,+,0.00),15(CAGCTG,+,0.00)
Merged-chr4-33198291-2	chr4	33198143	33198443	0(CAGCTG,+,0.00)
Merged-chr2-58665578-2	chr2	58665432	58665732	46(CAGCTG,+,0.00)	0(CAGGTG,+,0.00)	27(CACCTG,+,0.00),78(CACCTG,+,0.00)
Merged-chr2-84837289-2	chr2	84837146	84837446	0(CAGCTG,+,0.00)	-28(CAGGTG,+,0.00)
Merged-chr7-87584679-2	chr7	87584531	87584831	-112(CAGCTG,+,0.00)	0(CAGGTG,+,0.00),11(CAGGTG,+,0.00),22(CAGGTG,+,0.00)	-146(CACCTG,+,0.00)
Merged-chr17-15990416-2	chr17	15990271	15990571	0(CAGCTG,+,0.00),57(CAGCTG,+,0.00)
Merged-chr6-125161679-1	chr6	125161531	125161831	-66(CAGCTG,+,0.00),0(CAGCTG,+,0.00)
Merged-chr9-20202318-1	chr9	20202179	20202479		0(CAGGTG,+,0.00),45(CAGGTG,+,0.00),115(CAGGTG,+,0.00)
Merged-chr6-59169153-2	chr6	59168984	59169284		0(CAGGTG,+,0.00),45(CAGGTG,+,0.00)	-75(CACCTG,+,0.00)
Merged-chr11-98446926-2	chr11	98446775	98447075		0(CAGGTG,+,0.00),35(CAGGTG,+,0.00)
Merged-chr11-29637036-2	chr11	29636885	29637185	-81(CAGCTG,+,0.00),0(CAGCTG,+,0.00),100(CAGCTG,+,0.00)
Merged-chr3-95164186-1	chr3	95164048	95164348	0(CAGCTG,+,0.00)
Merged-chr14-79769855-1	chr14	79769696	79769996		0(CAGGTG,+,0.00)
Merged-chr7-120327484-2	chr7	120327340	120327640	0(CAGCTG,+,0.00),46(CAGCTG,+,0.00)
Merged-chr14-34303401-2	chr14	34303251	34303551	0(CAGCTG,+,0.00),89(CAGCTG,+,0.00)		9(CACCTG,+,0.00)
Merged-chr7-29162902-2	chr7	29162756	29163056	0(CAGCTG,+,0.00)
Merged-chr2-60689061-1	chr2	60688917	60689217	0(CAGCTG,+,0.00),13(CAGCTG,+,0.00)
Merged-chr9-46980298-1	chr9	46980139	46980439	0(CAGCTG,+,0.00),41(CAGCTG,+,0.00)	-125(CAGGTG,+,0.00)
Merged-chr6-83137716-1	chr6	83137559	83137859	-130(CAGCTG,+,0.00),-118(CAGCTG,+,0.00),0(CAGCTG,+,0.00)
Merged-chr1-72960412-2	chr1	72960256	72960556	0(CAGCTG,+,0.00),72(CAGCTG,+,0.00)
Merged-chr11-117934492-1	chr11	117934335	117934635		0(CAGGTG,+,0.00)
Merged-chr10-117571717-1	chr10	117571570	117571870	0(CAGCTG,+,0.00),21(CAGCTG,+,0.00)
Merged-chr8-33974221-1	chr8	33974077	33974377	-83(CAGCTG,+,0.00)	0(CAGGTG,+,0.00),82(CAGGTG,+,0.00)
Merged-chr4-53789577-2	chr4	53789446	53789746		0(CAGGTG,+,0.00)
Merged-chr13-44751886-1	chr13	44751728	44752028	-99(CAGCTG,+,0.00),-46(CAGCTG,+,0.00),0(CAGCTG,+,0.00)
Merged-chr16-65815275-2	chr16	65815119	65815419	0(CAGCTG,+,0.00)
Merged-chr12-113140387-2	chr12	113140250	113140550	26(CAGCTG,+,0.00)	0(CAGGTG,+,0.00)
Merged-chr17-24550126-2	chr17	24549975	24550275	0(CAGCTG,+,0.00)
Merged-chr14-54383743-1	chr14	54383590	54383890	-25(CAGCTG,+,0.00),0(CAGCTG,+,0.00)	95(CAGGTG,+,0.00)
Merged-chr10-130259590-2	chr10	130259449	130259749	0(CAGCTG,+,0.00),6(CAGCTG,+,0.00),25(CAGCTG,+,0.00)
Merged-chr11-95991081-1	chr11	95990933	95991233	0(CAGCTG,+,0.00),24(CAGCTG,+,0.00),75(CAGCTG,+,0.00)
Merged-chr15-63998277-2	chr15	63998124	63998424		0(CAGGTG,+,0.00)
Merged-chr8-112404361-1	chr8	112404215	112404515	0(CAGCTG,+,0.00)	122(CAGGTG,+,0.00)
Merged-chr3-37724328-2	chr3	37724168	37724468		0(CAGGTG,+,0.00)	-118(CACCTG,+,0.00)
Merged-chr4-143162293-2	chr4	143162134	143162434	0(CAGCTG,+,0.00)
Merged-chr5-137934306-2	chr5	137934142	137934442		0(CAGGTG,+,0.00)	129(CACCTG,+,0.00)
Merged-chr10-14967830-2	chr10	14967667	14967967	100(CAGCTG,+,0.00)	-20(CAGGTG,+,0.00),0(CAGGTG,+,0.00)
Merged-chr7-133114940-2	chr7	133114784	133115084	-93(CAGCTG,+,0.00),0(CAGCTG,+,0.00)	9(CAGGTG,+,0.00)
Merged-chr15-73687810-2	chr15	73687661	73687961		-111(CAGGTG,+,0.00),0(CAGGTG,+,0.00),24(CAGGTG,+,0.00)	71(CACCTG,+,0.00)
Merged-chr17-57070913-1	chr17	57070771	57071071	-12(CAGCTG,+,0.00)	0(CAGGTG,+,0.00)
Merged-chr6-99009993-2	chr6	99009845	99010145	0(CAGCTG,+,0.00)		51(CACCTG,+,0.00)
Merged-chr5-18688677-2	chr5	18688521	18688821	0(CAGCTG,+,0.00)	-81(CAGGTG,+,0.00)
Merged-chr10-128526143-2	chr10	128525986	128526286	0(CAGCTG,+,0.00)
Merged-chr1-60432704-1	chr1	60432566	60432866		0(CAGGTG,+,0.00)
Merged-chr17-35697887-2	chr17	35697741	35698041	-76(CAGCTG,+,0.00),-36(CAGCTG,+,0.00),0(CAGCTG,+,0.00)		31(CACCTG,+,0.00)
Merged-chr9-36917133-1	chr9	36916984	36917284	-56(CAGCTG,+,0.00),0(CAGCTG,+,0.00)
Merged-chr1-189142739-2	chr1	189142604	189142904	0(CAGCTG,+,0.00)		-62(CACCTG,+,0.00)
Merged-chr11-120659004-2	chr11	120658859	120659159		0(CAGGTG,+,0.00)	97(CACCTG,+,0.00)
Merged-chr18-9865880-1	chr18	9865733	9866033	0(CAGCTG,+,0.00)		-30(CACCTG,+,0.00)
Merged-chr11-101984329-2	chr11	101984167	101984467	38(CAGCTG,+,0.00)	0(CAGGTG,+,0.00)
Merged-chr13-74929236-1	chr13	74929096	74929396	0(CAGCTG,+,0.00)		42(CACCTG,+,0.00)
Merged-chr4-45490150-2	chr4	45490000	45490300	0(CAGCTG,+,0.00)		38(CACCTG,+,0.00)
Merged-chr10-14450281-1	chr10	14450146	14450446		0(CAGGTG,+,0.00)
Merged-chr4-142235049-2	chr4	142234919	142235219		-98(CAGGTG,+,0.00),0(CAGGTG,+,0.00)	-12(CACCTG,+,0.00)
Merged-chr19-44930875-2	chr19	44930727	44931027	0(CAGCTG,+,0.00),64(CAGCTG,+,0.00),110(CAGCTG,+,0.00)
Merged-chr13-112375916-2	chr13	112375768	112376068	-19(CAGCTG,+,0.00),0(CAGCTG,+,0.00)	-60(CAGGTG,+,0.00)
Merged-chr1-6458155-1	chr1	6458003	6458303	0(CAGCTG,+,0.00)
Merged-chr16-16912106-2	chr16	16911958	16912258	48(CAGCTG,+,0.00)	0(CAGGTG,+,0.00)
Merged-chr11-77462586-1	chr11	77462446	77462746	0(CAGCTG,+,0.00)
Merged-chr3-135438389-2	chr3	135438252	135438552	0(CAGCTG,+,0.00)
Merged-chr5-130038204-2	chr5	130038037	130038337	-126(CAGCTG,+,0.00)	0(CAGGTG,+,0.00)
Merged-chr10-128035517-2	chr10	128035372	128035672	-148(CAGCTG,+,0.00),0(CAGCTG,+,0.00)
Merged-chr13-99609519-1	chr13	99609353	99609653	0(CAGCTG,+,0.00)
Merged-chr1-53750191-1	chr1	53750029	53750329		0(CAGGTG,+,0.00),28(CAGGTG,+,0.00)
Merged-chr6-120666194-2	chr6	120666043	120666343	0(CAGCTG,+,0.00)		-126(CACCTG,+,0.00)
Merged-chr4-99766904-2	chr4	99766761	99767061	0(CAGCTG,+,0.00)	-16(CAGGTG,+,0.00)
Merged-chr17-72603277-1	chr17	72603125	72603425	-107(CAGCTG,+,0.00),0(CAGCTG,+,0.00)
Merged-chr18-35815669-2	chr18	35815508	35815808	0(CAGCTG,+,0.00)
Merged-chrX-43430830-2	chrX	43430685	43430985	-26(CAGCTG,+,0.00),0(CAGCTG,+,0.00)
Merged-chr11-52764570-2	chr11	52764404	52764704		0(CAGGTG,+,0.00),104(CAGGTG,+,0.00)	-44(CACCTG,+,0.00),57(CACCTG,+,0.00)
Merged-chr4-6093560-2	chr4	6093411	6093711		-44(CAGGTG,+,0.00),0(CAGGTG,+,0.00)
Merged-chr6-88976704-2	chr6	88976546	88976846		0(CAGGTG,+,0.00)
Merged-chr16-9132932-2	chr16	9132778	9133078		-138(CAGGTG,+,0.00),0(CAGGTG,+,0.00)
Merged-chr1-36251642-2	chr1	36251485	36251785	21(CAGCTG,+,0.00),38(CAGCTG,+,0.00)	0(CAGGTG,+,0.00)
Merged-chr18-14512330-2	chr18	14512187	14512487	0(CAGCTG,+,0.00)
Merged-chr8-28594819-2	chr8	28594661	28594961	101(CAGCTG,+,0.00)	0(CAGGTG,+,0.00)	-40(CACCTG,+,0.00)
Merged-chr18-36348743-1	chr18	36348582	36348882		-74(CAGGTG,+,0.00),0(CAGGTG,+,0.00)
Merged-chrX-169036498-2	chrX	169036347	169036647	0(CAGCTG,+,0.00)		-38(CACCTG,+,0.00)
Merged-chr19-24225103-2	chr19	24224976	24225276		0(CAGGTG,+,0.00)
Merged-chr11-13006673-2	chr11	13006511	13006811		0(CAGGTG,+,0.00),28(CAGGTG,+,0.00)
Merged-chr18-65925309-2	chr18	65925156	65925456	0(CAGCTG,+,0.00),57(CAGCTG,+,0.00)
Merged-chr17-28226237-1	chr17	28226099	28226399	-117(CAGCTG,+,0.00),0(CAGCTG,+,0.00)
Merged-chr5-34660393-2	chr5	34660244	34660544	0(CAGCTG,+,0.00)
Merged-chr5-127688855-2	chr5	127688691	127688991		0(CAGGTG,+,0.00)
Merged-chr12-12904852-1	chr12	12904702	12905002	0(CAGCTG,+,0.00)
Merged-chr4-118544029-2	chr4	118543873	118544173		0(CAGGTG,+,0.00)	-48(CACCTG,+,0.00),-19(CACCTG,+,0.00)
Merged-chr9-120011416-1	chr9	120011269	120011569		-24(CAGGTG,+,0.00),-12(CAGGTG,+,0.00),0(CAGGTG,+,0.00)
Merged-chr9-113793281-2	chr9	113793136	113793436	0(CAGCTG,+,0.00)
Merged-chr18-6308393-2	chr18	6308239	6308539		0(CAGGTG,+,0.00),13(CAGGTG,+,0.00)
Merged-chr6-4087106-1	chr6	4086953	4087253	0(CAGCTG,+,0.00)
Merged-chr18-72949379-2	chr18	72949250	72949550	-95(CAGCTG,+,0.00),-60(CAGCTG,+,0.00)	0(CAGGTG,+,0.00),51(CAGGTG,+,0.00)
Merged-chr16-8470685-2	chr16	8470531	8470831	0(CAGCTG,+,0.00)		-43(CACCTG,+,0.00),7(CACCTG,+,0.00)
Merged-chr11-98964806-2	chr11	98964644	98964944	0(CAGCTG,+,0.00)
Merged-chr11-79327165-1	chr11	79327003	79327303	0(CAGCTG,+,0.00)		-106(CACCTG,+,0.00)
Merged-chr10-91177310-2	chr10	91177165	91177465	-16(CAGCTG,+,0.00)	0(CAGGTG,+,0.00)
Merged-chr12-65206591-2	chr12	65206454	65206754		0(CAGGTG,+,0.00),45(CAGGTG,+,0.00)
Merged-chr6-82402908-2	chr6	82402759	82403059	0(CAGCTG,+,0.00),19(CAGCTG,+,0.00)
Merged-chr18-38014384-1	chr18	38014256	38014556	-14(CAGCTG,+,0.00)	0(CAGGTG,+,0.00)
Merged-chr13-64432530-2	chr13	64432363	64432663	0(CAGCTG,+,0.00)
Merged-chr1-177555830-1	chr1	177555675	177555975	-115(CAGCTG,+,0.00),0(CAGCTG,+,0.00),76(CAGCTG,+,0.00),108(CAGCTG,+,0.00)
Merged-chr17-47511418-1	chr17	47511275	47511575	0(CAGCTG,+,0.00),38(CAGCTG,+,0.00)		-19(CACCTG,+,0.00)
Merged-chr18-24259105-2	chr18	24258959	24259259	0(CAGCTG,+,0.00)
Merged-chr11-41645255-2	chr11	41645087	41645387	0(CAGCTG,+,0.00),119(CAGCTG,+,0.00)
Merged-chr6-135040491-2	chr6	135040345	135040645		0(CAGGTG,+,0.00)	87(CACCTG,+,0.00)
Merged-chr9-76565835-1	chr9	76565703	76566003	0(CAGCTG,+,0.00)		13(CACCTG,+,0.00)
Merged-chr7-85104691-2	chr7	85104533	85104833	-81(CAGCTG,+,0.00)	-75(CAGGTG,+,0.00),0(CAGGTG,+,0.00)	-112(CACCTG,+,0.00)
Merged-chr7-126950016-1	chr7	126949860	126950160		0(CAGGTG,+,0.00)
Merged-chr10-128590392-1	chr10	128590242	128590542	0(CAGCTG,+,0.00)	47(CAGGTG,+,0.00)
Merged-chr2-167689843-2	chr2	167689684	167689984	-42(CAGCTG,+,0.00),0(CAGCTG,+,0.00)
Merged-chr19-48807525-1	chr19	48807360	48807660	0(CAGCTG,+,0.00)
Merged-chr11-44333642-1	chr11	44333503	44333803	45(CAGCTG,+,0.00),55(CAGCTG,+,0.00),63(CAGCTG,+,0.00)	0(CAGGTG,+,0.00)
Merged-chr8-104509944-1	chr8	104509804	104510104	-28(CAGCTG,+,0.00)	0(CAGGTG,+,0.00)
Merged-chr13-38109269-1	chr13	38109117	38109417		0(CAGGTG,+,0.00)
Merged-chr5-105700766-2	chr5	105700606	105700906		0(CAGGTG,+,0.00)
Merged-chr8-84223461-2	chr8	84223325	84223625		0(CAGGTG,+,0.00)
Merged-chr19-43675652-1	chr19	43675499	43675799		0(CAGGTG,+,0.00)
Merged-chr7-75455363-2	chr7	75455193	75455493	0(CAGCTG,+,0.00)
Merged-chr3-7805306-1	chr3	7805150	7805450		0(CAGGTG,+,0.00)	122(CACCTG,+,0.00)
Merged-chr3-8850985-2	chr3	8850826	8851126	0(CAGCTG,+,0.00),104(CAGCTG,+,0.00),134(CAGCTG,+,0.00)
Merged-chr18-35022644-1	chr18	35022496	35022796	0(CAGCTG,+,0.00)		122(CACCTG,+,0.00)
Merged-chr8-46584552-2	chr8	46584400	46584700		0(CAGGTG,+,0.00),45(CAGGTG,+,0.00)
Merged-chr19-32242434-1	chr19	32242273	32242573		0(CAGGTG,+,0.00)
Merged-chr6-5027348-2	chr6	5027173	5027473		0(CAGGTG,+,0.00),97(CAGGTG,+,0.00)
Merged-chr3-121736635-2	chr3	121736481	121736781	0(CAGCTG,+,0.00)
Merged-chr7-6189808-1	chr7	6189641	6189941		0(CAGGTG,+,0.00),120(CAGGTG,+,0.00)
Merged-chr7-45162307-2	chr7	45162179	45162479		0(CAGGTG,+,0.00)	-58(CACCTG,+,0.00)
Merged-chr17-51839602-1	chr17	51839471	51839771	0(CAGCTG,+,0.00)
Merged-chr9-120732799-1	chr9	120732637	120732937		0(CAGGTG,+,0.00),78(CAGGTG,+,0.00)

## Sheet: MYOD1_closed
PeakID	Chr	Start	End	CAGCTG Distance From Peak(sequence,strand,conservation)	CAGGTG Distance From Peak(sequence,strand,conservation)	CACCTG Distance From Peak(sequence,strand,conservation)
Merged-chr4-107366644-2	chr4	107366489	107366789		-66(CAGGTG,+,0.00),-55(CAGGTG,+,0.00),-44(CAGGTG,+,0.00),-33(CAGGTG,+,0.00),-22(CAGGTG,+,0.00),-11(CAGGTG,+,0.00),0(CAGGTG,+,0.00),11(CAGGTG,+,0.00),22(CAGGTG,+,0.00),33(CAGGTG,+,0.00),44(CAGGTG,+,0.00),55(CAGGTG,+,0.00),66(CAGGTG,+,0.00),77(CAGGTG,+,0.00),88(CAGGTG,+,0.00),99(CAGGTG,+,0.00),107(CAGGTG,+,0.00)
Merged-chr17-8205351-2	chr17	8205196	8205496	-115(CAGCTG,+,0.00),-94(CAGCTG,+,0.00),-70(CAGCTG,+,0.00),-50(CAGCTG,+,0.00),-29(CAGCTG,+,0.00),-9(CAGCTG,+,0.00),11(CAGCTG,+,0.00),32(CAGCTG,+,0.00),52(CAGCTG,+,0.00),73(CAGCTG,+,0.00),93(CAGCTG,+,0.00),113(CAGCTG,+,0.00),133(CAGCTG,+,0.00)	-61(CAGGTG,+,0.00),0(CAGGTG,+,0.00),20(CAGGTG,+,0.00),61(CAGGTG,+,0.00),102(CAGGTG,+,0.00),122(CAGGTG,+,0.00),142(CAGGTG,+,0.00)
Merged-chr2-168023818-2	chr2	168023677	168023977		-144(CAGGTG,+,0.00),-128(CAGGTG,+,0.00),-112(CAGGTG,+,0.00),-80(CAGGTG,+,0.00),-64(CAGGTG,+,0.00),-48(CAGGTG,+,0.00),-32(CAGGTG,+,0.00),-16(CAGGTG,+,0.00),0(CAGGTG,+,0.00),32(CAGGTG,+,0.00),64(CAGGTG,+,0.00),80(CAGGTG,+,0.00),96(CAGGTG,+,0.00),112(CAGGTG,+,0.00),128(CAGGTG,+,0.00)
Merged-chr6-97260109-2	chr6	97259961	97260261	-54(CAGCTG,+,0.00),-45(CAGCTG,+,0.00),-36(CAGCTG,+,0.00),-27(CAGCTG,+,0.00),-18(CAGCTG,+,0.00),-9(CAGCTG,+,0.00),0(CAGCTG,+,0.00),9(CAGCTG,+,0.00),18(CAGCTG,+,0.00),27(CAGCTG,+,0.00),36(CAGCTG,+,0.00),45(CAGCTG,+,0.00),54(CAGCTG,+,0.00),63(CAGCTG,+,0.00)
Merged-chr2-163449462-2	chr2	163449317	163449617	-22(CAGCTG,+,0.00)	-33(CAGGTG,+,0.00),-11(CAGGTG,+,0.00),0(CAGGTG,+,0.00),11(CAGGTG,+,0.00),22(CAGGTG,+,0.00),33(CAGGTG,+,0.00),44(CAGGTG,+,0.00),55(CAGGTG,+,0.00)
Merged-chr10-41404439-2	chr10	41404284	41404584	-31(CAGCTG,+,0.00),22(CAGCTG,+,0.00)	-71(CAGGTG,+,0.00),-54(CAGGTG,+,0.00),-37(CAGGTG,+,0.00),-17(CAGGTG,+,0.00),0(CAGGTG,+,0.00),16(CAGGTG,+,0.00),32(CAGGTG,+,0.00),48(CAGGTG,+,0.00)
Merged-chr1-189991265-2	chr1	189991113	189991413	-50(CAGCTG,+,0.00),0(CAGCTG,+,0.00),49(CAGCTG,+,0.00),87(CAGCTG,+,0.00)		-63(CACCTG,+,0.00),-39(CACCTG,+,0.00),-26(CACCTG,+,0.00),-13(CACCTG,+,0.00),10(CACCTG,+,0.00),62(CACCTG,+,0.00),100(CACCTG,+,0.00)
Merged-chr15-98744032-2	chr15	98743893	98744193	-126(CAGCTG,+,0.00),-87(CAGCTG,+,0.00),-58(CAGCTG,+,0.00),-29(CAGCTG,+,0.00),0(CAGCTG,+,0.00),29(CAGCTG,+,0.00),58(CAGCTG,+,0.00),87(CAGCTG,+,0.00),116(CAGCTG,+,0.00)
Merged-chr4-134973014-2	chr4	134972866	134973166	-105(CAGCTG,+,0.00),-75(CAGCTG,+,0.00),-45(CAGCTG,+,0.00),0(CAGCTG,+,0.00),90(CAGCTG,+,0.00),105(CAGCTG,+,0.00),120(CAGCTG,+,0.00)	-120(CAGGTG,+,0.00),-90(CAGGTG,+,0.00),-60(CAGGTG,+,0.00),15(CAGGTG,+,0.00),30(CAGGTG,+,0.00),60(CAGGTG,+,0.00),75(CAGGTG,+,0.00),135(CAGGTG,+,0.00)
Merged-chr17-87072371-2	chr17	87072220	87072520		-58(CAGGTG,+,0.00),-44(CAGGTG,+,0.00),-14(CAGGTG,+,0.00),0(CAGGTG,+,0.00),14(CAGGTG,+,0.00),28(CAGGTG,+,0.00),42(CAGGTG,+,0.00),56(CAGGTG,+,0.00),70(CAGGTG,+,0.00),84(CAGGTG,+,0.00),98(CAGGTG,+,0.00),112(CAGGTG,+,0.00),126(CAGGTG,+,0.00),140(CAGGTG,+,0.00)
Merged-chr12-54326771-2	chr12	54326628	54326928	-96(CAGCTG,+,0.00),-72(CAGCTG,+,0.00),-48(CAGCTG,+,0.00),-36(CAGCTG,+,0.00),-24(CAGCTG,+,0.00),0(CAGCTG,+,0.00),12(CAGCTG,+,0.00),24(CAGCTG,+,0.00),36(CAGCTG,+,0.00),48(CAGCTG,+,0.00)
Merged-chr16-13429016-2	chr16	13428863	13429163	-141(CAGCTG,+,0.00),-129(CAGCTG,+,0.00),-110(CAGCTG,+,0.00),-98(CAGCTG,+,0.00),-75(CAGCTG,+,0.00),-44(CAGCTG,+,0.00),-32(CAGCTG,+,0.00),-13(CAGCTG,+,0.00),0(CAGCTG,+,0.00),21(CAGCTG,+,0.00),32(CAGCTG,+,0.00),57(CAGCTG,+,0.00),89(CAGCTG,+,0.00)		76(CACCTG,+,0.00)
Merged-chr3-9540612-2	chr3	9540462	9540762	119(CAGCTG,+,0.00)	-91(CAGGTG,+,0.00),-78(CAGGTG,+,0.00),-65(CAGGTG,+,0.00),-52(CAGGTG,+,0.00),-39(CAGGTG,+,0.00),-26(CAGGTG,+,0.00),-13(CAGGTG,+,0.00),0(CAGGTG,+,0.00),13(CAGGTG,+,0.00),26(CAGGTG,+,0.00),39(CAGGTG,+,0.00),52(CAGGTG,+,0.00),65(CAGGTG,+,0.00),78(CAGGTG,+,0.00),91(CAGGTG,+,0.00)
Merged-chr17-7187239-2	chr17	7187092	7187392		-146(CAGGTG,+,0.00),-114(CAGGTG,+,0.00),-82(CAGGTG,+,0.00),-50(CAGGTG,+,0.00),-18(CAGGTG,+,0.00),0(CAGGTG,+,0.00),14(CAGGTG,+,0.00),32(CAGGTG,+,0.00),46(CAGGTG,+,0.00),64(CAGGTG,+,0.00),78(CAGGTG,+,0.00),96(CAGGTG,+,0.00),110(CAGGTG,+,0.00),128(CAGGTG,+,0.00),142(CAGGTG,+,0.00)
Merged-chr5-110372232-2	chr5	110372086	110372386		-54(CAGGTG,+,0.00),-39(CAGGTG,+,0.00),-15(CAGGTG,+,0.00),0(CAGGTG,+,0.00),16(CAGGTG,+,0.00),31(CAGGTG,+,0.00),45(CAGGTG,+,0.00),81(CAGGTG,+,0.00)
Merged-chr12-105550504-2	chr12	105550362	105550662		-146(CAGGTG,+,0.00),-127(CAGGTG,+,0.00),-108(CAGGTG,+,0.00),-91(CAGGTG,+,0.00),-72(CAGGTG,+,0.00),-53(CAGGTG,+,0.00),-36(CAGGTG,+,0.00),0(CAGGTG,+,0.00),20(CAGGTG,+,0.00),39(CAGGTG,+,0.00),56(CAGGTG,+,0.00),75(CAGGTG,+,0.00),94(CAGGTG,+,0.00),111(CAGGTG,+,0.00),130(CAGGTG,+,0.00)
Merged-chr7-142229518-2	chr7	142229369	142229669	-99(CAGCTG,+,0.00),-84(CAGCTG,+,0.00),-54(CAGCTG,+,0.00),0(CAGCTG,+,0.00),30(CAGCTG,+,0.00),84(CAGCTG,+,0.00),114(CAGCTG,+,0.00),144(CAGCTG,+,0.00)
Merged-chr6-118431708-2	chr6	118431560	118431860	-56(CAGCTG,+,0.00),-41(CAGCTG,+,0.00),-26(CAGCTG,+,0.00),-13(CAGCTG,+,0.00),0(CAGCTG,+,0.00),13(CAGCTG,+,0.00),26(CAGCTG,+,0.00),39(CAGCTG,+,0.00)
Merged-chr9-62675976-2	chr9	62675827	62676127		-144(CAGGTG,+,0.00),-128(CAGGTG,+,0.00),-112(CAGGTG,+,0.00),-96(CAGGTG,+,0.00),-80(CAGGTG,+,0.00),-64(CAGGTG,+,0.00),-48(CAGGTG,+,0.00),-16(CAGGTG,+,0.00),0(CAGGTG,+,0.00),16(CAGGTG,+,0.00),32(CAGGTG,+,0.00),48(CAGGTG,+,0.00)
Merged-chr4-140171569-2	chr4	140171427	140171727		-62(CAGGTG,+,0.00),-50(CAGGTG,+,0.00),-31(CAGGTG,+,0.00),-19(CAGGTG,+,0.00),0(CAGGTG,+,0.00),19(CAGGTG,+,0.00),38(CAGGTG,+,0.00),57(CAGGTG,+,0.00),76(CAGGTG,+,0.00),114(CAGGTG,+,0.00),133(CAGGTG,+,0.00)
Merged-chr2-75750564-2	chr2	75750417	75750717		-52(CAGGTG,+,0.00),-39(CAGGTG,+,0.00),-26(CAGGTG,+,0.00),0(CAGGTG,+,0.00),26(CAGGTG,+,0.00),39(CAGGTG,+,0.00)
Merged-chr13-100990837-2	chr13	100990687	100990987		-78(CAGGTG,+,0.00),-65(CAGGTG,+,0.00),-52(CAGGTG,+,0.00),-39(CAGGTG,+,0.00),-26(CAGGTG,+,0.00),-13(CAGGTG,+,0.00),0(CAGGTG,+,0.00),13(CAGGTG,+,0.00),26(CAGGTG,+,0.00),39(CAGGTG,+,0.00),52(CAGGTG,+,0.00),65(CAGGTG,+,0.00)
Merged-chr9-64497438-2	chr9	64497296	64497596	57(CAGCTG,+,0.00)	-141(CAGGTG,+,0.00),-132(CAGGTG,+,0.00),-108(CAGGTG,+,0.00),-99(CAGGTG,+,0.00),-75(CAGGTG,+,0.00),-66(CAGGTG,+,0.00),-42(CAGGTG,+,0.00),-33(CAGGTG,+,0.00),-9(CAGGTG,+,0.00),0(CAGGTG,+,0.00),24(CAGGTG,+,0.00),33(CAGGTG,+,0.00),90(CAGGTG,+,0.00)
Merged-chr4-130283052-2	chr4	130282899	130283199	-26(CAGCTG,+,0.00),-12(CAGCTG,+,0.00),26(CAGCTG,+,0.00)	0(CAGGTG,+,0.00)
Merged-chr1-89998874-2	chr1	89998722	89999022	-13(CAGCTG,+,0.00),0(CAGCTG,+,0.00),13(CAGCTG,+,0.00),26(CAGCTG,+,0.00)		39(CACCTG,+,0.00)
Merged-chr6-100320781-2	chr6	100320629	100320929	-95(CAGCTG,+,0.00)	-75(CAGGTG,+,0.00),-60(CAGGTG,+,0.00),-45(CAGGTG,+,0.00),-30(CAGGTG,+,0.00),-15(CAGGTG,+,0.00),0(CAGGTG,+,0.00),15(CAGGTG,+,0.00),30(CAGGTG,+,0.00),45(CAGGTG,+,0.00),60(CAGGTG,+,0.00),75(CAGGTG,+,0.00),105(CAGGTG,+,0.00),120(CAGGTG,+,0.00)
Merged-chr14-19701759-2	chr14	19701606	19701906		-80(CAGGTG,+,0.00),-64(CAGGTG,+,0.00),-48(CAGGTG,+,0.00),-32(CAGGTG,+,0.00),-16(CAGGTG,+,0.00),0(CAGGTG,+,0.00),16(CAGGTG,+,0.00),48(CAGGTG,+,0.00),64(CAGGTG,+,0.00),77(CAGGTG,+,0.00)
Merged-chr15-76012971-2	chr15	76012824	76013124	-117(CAGCTG,+,0.00),-75(CAGCTG,+,0.00),-60(CAGCTG,+,0.00),-45(CAGCTG,+,0.00),-30(CAGCTG,+,0.00),-12(CAGCTG,+,0.00),0(CAGCTG,+,0.00),33(CAGCTG,+,0.00),54(CAGCTG,+,0.00)
Merged-chr13-57949704-2	chr13	57949551	57949851		-42(CAGGTG,+,0.00),-29(CAGGTG,+,0.00),-17(CAGGTG,+,0.00),0(CAGGTG,+,0.00),13(CAGGTG,+,0.00),25(CAGGTG,+,0.00),42(CAGGTG,+,0.00),55(CAGGTG,+,0.00),67(CAGGTG,+,0.00)
Merged-chr1-191268978-2	chr1	191268826	191269126	-126(CAGCTG,+,0.00),65(CAGCTG,+,0.00)	-102(CAGGTG,+,0.00),-26(CAGGTG,+,0.00),-13(CAGGTG,+,0.00),0(CAGGTG,+,0.00),13(CAGGTG,+,0.00),26(CAGGTG,+,0.00),39(CAGGTG,+,0.00),52(CAGGTG,+,0.00)
Merged-chr15-101494425-2	chr15	101494278	101494578	-92(CAGCTG,+,0.00),-79(CAGCTG,+,0.00),-66(CAGCTG,+,0.00),-13(CAGCTG,+,0.00),0(CAGCTG,+,0.00),13(CAGCTG,+,0.00)		26(CACCTG,+,0.00),39(CACCTG,+,0.00),52(CACCTG,+,0.00),112(CACCTG,+,0.00)
Merged-chr12-111021316-2	chr12	111021177	111021477	-48(CAGCTG,+,0.00),-33(CAGCTG,+,0.00),0(CAGCTG,+,0.00)	18(CAGGTG,+,0.00)
Merged-chr6-72827802-2	chr6	72827645	72827945		-135(CAGGTG,+,0.00),-118(CAGGTG,+,0.00),-80(CAGGTG,+,0.00),-42(CAGGTG,+,0.00),-21(CAGGTG,+,0.00),0(CAGGTG,+,0.00),21(CAGGTG,+,0.00),46(CAGGTG,+,0.00),63(CAGGTG,+,0.00)
Merged-chr7-142212254-2	chr7	142212113	142212413	-99(CAGCTG,+,0.00),-84(CAGCTG,+,0.00),-54(CAGCTG,+,0.00),0(CAGCTG,+,0.00),30(CAGCTG,+,0.00),84(CAGCTG,+,0.00),114(CAGCTG,+,0.00)
Merged-chr5-114166403-2	chr5	114166252	114166552		-78(CAGGTG,+,0.00),-65(CAGGTG,+,0.00),-26(CAGGTG,+,0.00),-13(CAGGTG,+,0.00),0(CAGGTG,+,0.00),13(CAGGTG,+,0.00),39(CAGGTG,+,0.00)
Merged-chr2-166389751-2	chr2	166389589	166389889		-136(CAGGTG,+,0.00),-107(CAGGTG,+,0.00),-87(CAGGTG,+,0.00),-58(CAGGTG,+,0.00),-29(CAGGTG,+,0.00),0(CAGGTG,+,0.00),29(CAGGTG,+,0.00),58(CAGGTG,+,0.00),87(CAGGTG,+,0.00)
Merged-chr7-19951990-2	chr7	19951840	19952140	-14(CAGCTG,+,0.00),0(CAGCTG,+,0.00),14(CAGCTG,+,0.00),56(CAGCTG,+,0.00),70(CAGCTG,+,0.00),84(CAGCTG,+,0.00),140(CAGCTG,+,0.00)	-110(CAGGTG,+,0.00)	-117(CACCTG,+,0.00)
Merged-chr7-43777984-2	chr7	43777831	43778131		-44(CAGGTG,+,0.00),-33(CAGGTG,+,0.00),-22(CAGGTG,+,0.00),-11(CAGGTG,+,0.00),0(CAGGTG,+,0.00),11(CAGGTG,+,0.00),22(CAGGTG,+,0.00),33(CAGGTG,+,0.00),44(CAGGTG,+,0.00),91(CAGGTG,+,0.00)
Merged-chr2-60710522-2	chr2	60710373	60710673	-39(CAGCTG,+,0.00),0(CAGCTG,+,0.00),9(CAGCTG,+,0.00)	41(CAGGTG,+,0.00),73(CAGGTG,+,0.00)
Merged-chr1-179238871-2	chr1	179238713	179239013		-56(CAGGTG,+,0.00),-40(CAGGTG,+,0.00),-20(CAGGTG,+,0.00),0(CAGGTG,+,0.00),24(CAGGTG,+,0.00),35(CAGGTG,+,0.00),86(CAGGTG,+,0.00),129(CAGGTG,+,0.00)
Merged-chr4-154183356-2	chr4	154183216	154183516		-143(CAGGTG,+,0.00),-127(CAGGTG,+,0.00),-116(CAGGTG,+,0.00),-93(CAGGTG,+,0.00),-77(CAGGTG,+,0.00),-66(CAGGTG,+,0.00),-43(CAGGTG,+,0.00),0(CAGGTG,+,0.00),11(CAGGTG,+,0.00),38(CAGGTG,+,0.00),54(CAGGTG,+,0.00),103(CAGGTG,+,0.00),129(CAGGTG,+,0.00)
Merged-chr4-139688809-2	chr4	139688663	139688963		-135(CAGGTG,+,0.00),-124(CAGGTG,+,0.00),-104(CAGGTG,+,0.00),-93(CAGGTG,+,0.00),-73(CAGGTG,+,0.00),-62(CAGGTG,+,0.00),-42(CAGGTG,+,0.00),-31(CAGGTG,+,0.00),-11(CAGGTG,+,0.00),0(CAGGTG,+,0.00),20(CAGGTG,+,0.00),31(CAGGTG,+,0.00),51(CAGGTG,+,0.00),62(CAGGTG,+,0.00)
Merged-chr15-38251186-2	chr15	38251026	38251326		-110(CAGGTG,+,0.00),-77(CAGGTG,+,0.00),-49(CAGGTG,+,0.00),-20(CAGGTG,+,0.00),0(CAGGTG,+,0.00),29(CAGGTG,+,0.00),48(CAGGTG,+,0.00),76(CAGGTG,+,0.00),96(CAGGTG,+,0.00),120(CAGGTG,+,0.00),138(CAGGTG,+,0.00)
Merged-chr7-6121343-2	chr7	6121181	6121481	-45(CAGCTG,+,0.00),70(CAGCTG,+,0.00)	0(CAGGTG,+,0.00),56(CAGGTG,+,0.00)
Merged-chr14-31571597-2	chr14	31571443	31571743	-150(CAGCTG,+,0.00),-91(CAGCTG,+,0.00)	-11(CAGGTG,+,0.00),0(CAGGTG,+,0.00),11(CAGGTG,+,0.00),33(CAGGTG,+,0.00),44(CAGGTG,+,0.00),55(CAGGTG,+,0.00),66(CAGGTG,+,0.00)
Merged-chr11-76329012-2	chr11	76328857	76329157	-72(CAGCTG,+,0.00),-54(CAGCTG,+,0.00),-36(CAGCTG,+,0.00),-18(CAGCTG,+,0.00),0(CAGCTG,+,0.00)	-144(CAGGTG,+,0.00),-126(CAGGTG,+,0.00),18(CAGGTG,+,0.00),36(CAGGTG,+,0.00),54(CAGGTG,+,0.00)
Merged-chr1-132890878-2	chr1	132890727	132891027	0(CAGCTG,+,0.00),47(CAGCTG,+,0.00),57(CAGCTG,+,0.00)	29(CAGGTG,+,0.00)	8(CACCTG,+,0.00)
Merged-chr16-90082225-2	chr16	90082079	90082379		-143(CAGGTG,+,0.00),-129(CAGGTG,+,0.00),-111(CAGGTG,+,0.00),-83(CAGGTG,+,0.00),-69(CAGGTG,+,0.00),-55(CAGGTG,+,0.00),-41(CAGGTG,+,0.00),-14(CAGGTG,+,0.00),0(CAGGTG,+,0.00),14(CAGGTG,+,0.00),28(CAGGTG,+,0.00),42(CAGGTG,+,0.00),56(CAGGTG,+,0.00),70(CAGGTG,+,0.00),84(CAGGTG,+,0.00),98(CAGGTG,+,0.00)
Merged-chr14-47356799-2	chr14	47356650	47356950	-35(CAGCTG,+,0.00),-26(CAGCTG,+,0.00),-17(CAGCTG,+,0.00),-8(CAGCTG,+,0.00),0(CAGCTG,+,0.00),32(CAGCTG,+,0.00)
Merged-chr17-34388098-2	chr17	34387945	34388245		-144(CAGGTG,+,0.00),-128(CAGGTG,+,0.00),-112(CAGGTG,+,0.00),-96(CAGGTG,+,0.00),-80(CAGGTG,+,0.00),-64(CAGGTG,+,0.00),-48(CAGGTG,+,0.00),-32(CAGGTG,+,0.00),-16(CAGGTG,+,0.00),0(CAGGTG,+,0.00)	45(CACCTG,+,0.00)
Merged-chr8-124262285-2	chr8	124262144	124262444		-111(CAGGTG,+,0.00),-93(CAGGTG,+,0.00),-75(CAGGTG,+,0.00),-56(CAGGTG,+,0.00),-38(CAGGTG,+,0.00),-19(CAGGTG,+,0.00),0(CAGGTG,+,0.00),18(CAGGTG,+,0.00),37(CAGGTG,+,0.00),55(CAGGTG,+,0.00),73(CAGGTG,+,0.00),92(CAGGTG,+,0.00),110(CAGGTG,+,0.00),129(CAGGTG,+,0.00)
Merged-chr8-13916614-2	chr8	13916464	13916764		-62(CAGGTG,+,0.00),-40(CAGGTG,+,0.00),-19(CAGGTG,+,0.00),0(CAGGTG,+,0.00),21(CAGGTG,+,0.00),42(CAGGTG,+,0.00),64(CAGGTG,+,0.00),85(CAGGTG,+,0.00),104(CAGGTG,+,0.00),125(CAGGTG,+,0.00)
Merged-chr9-106646835-2	chr9	106646690	106646990		-73(CAGGTG,+,0.00),-48(CAGGTG,+,0.00),-23(CAGGTG,+,0.00),0(CAGGTG,+,0.00),24(CAGGTG,+,0.00),47(CAGGTG,+,0.00)
Merged-chr11-6481814-2	chr11	6481663	6481963	-60(CAGCTG,+,0.00),-27(CAGCTG,+,0.00),0(CAGCTG,+,0.00),42(CAGCTG,+,0.00)	-136(CAGGTG,+,0.00)
Merged-chr11-116124107-2	chr11	116123963	116124263		-80(CAGGTG,+,0.00),-64(CAGGTG,+,0.00),-48(CAGGTG,+,0.00),-32(CAGGTG,+,0.00),-16(CAGGTG,+,0.00),0(CAGGTG,+,0.00),16(CAGGTG,+,0.00),32(CAGGTG,+,0.00),48(CAGGTG,+,0.00),64(CAGGTG,+,0.00),80(CAGGTG,+,0.00),96(CAGGTG,+,0.00),112(CAGGTG,+,0.00),128(CAGGTG,+,0.00)
Merged-chr10-7133233-2	chr10	7133083	7133383	-36(CAGCTG,+,0.00),-12(CAGCTG,+,0.00),12(CAGCTG,+,0.00),36(CAGCTG,+,0.00)	-69(CAGGTG,+,0.00),-24(CAGGTG,+,0.00),0(CAGGTG,+,0.00),24(CAGGTG,+,0.00),48(CAGGTG,+,0.00)
Merged-chr2-169421551-2	chr2	169421404	169421704	-36(CAGCTG,+,0.00)	-72(CAGGTG,+,0.00),-48(CAGGTG,+,0.00),-24(CAGGTG,+,0.00),-12(CAGGTG,+,0.00),0(CAGGTG,+,0.00),12(CAGGTG,+,0.00),24(CAGGTG,+,0.00),36(CAGGTG,+,0.00),48(CAGGTG,+,0.00),60(CAGGTG,+,0.00),72(CAGGTG,+,0.00),84(CAGGTG,+,0.00),96(CAGGTG,+,0.00),108(CAGGTG,+,0.00),120(CAGGTG,+,0.00),132(CAGGTG,+,0.00),144(CAGGTG,+,0.00)
Merged-chr17-27100390-2	chr17	27100259	27100559	-69(CAGCTG,+,0.00),0(CAGCTG,+,0.00)	-119(CAGGTG,+,0.00),-54(CAGGTG,+,0.00),-43(CAGGTG,+,0.00),36(CAGGTG,+,0.00),59(CAGGTG,+,0.00)
Merged-chr11-99846974-2	chr11	99846829	99847129	-102(CAGCTG,+,0.00),-88(CAGCTG,+,0.00),-73(CAGCTG,+,0.00),-60(CAGCTG,+,0.00),-45(CAGCTG,+,0.00),-30(CAGCTG,+,0.00),-15(CAGCTG,+,0.00),0(CAGCTG,+,0.00),30(CAGCTG,+,0.00),119(CAGCTG,+,0.00)	87(CAGGTG,+,0.00),107(CAGGTG,+,0.00)
Merged-chr13-40669998-2	chr13	40669849	40670149		-80(CAGGTG,+,0.00),-64(CAGGTG,+,0.00),-48(CAGGTG,+,0.00),-32(CAGGTG,+,0.00),-16(CAGGTG,+,0.00),0(CAGGTG,+,0.00),31(CAGGTG,+,0.00),142(CAGGTG,+,0.00)
Merged-chr5-26413137-2	chr5	26412982	26413282	-54(CAGCTG,+,0.00),-27(CAGCTG,+,0.00),0(CAGCTG,+,0.00),27(CAGCTG,+,0.00)	-66(CAGGTG,+,0.00),-39(CAGGTG,+,0.00),-12(CAGGTG,+,0.00),15(CAGGTG,+,0.00),42(CAGGTG,+,0.00)	134(CACCTG,+,0.00)
Merged-chr2-173732618-2	chr2	173732458	173732758		-60(CAGGTG,+,0.00),-40(CAGGTG,+,0.00),-20(CAGGTG,+,0.00),0(CAGGTG,+,0.00),20(CAGGTG,+,0.00),40(CAGGTG,+,0.00),75(CAGGTG,+,0.00),136(CAGGTG,+,0.00)
Merged-chr10-42163760-2	chr10	42163617	42163917		-136(CAGGTG,+,0.00),-121(CAGGTG,+,0.00),-105(CAGGTG,+,0.00),-97(CAGGTG,+,0.00),-88(CAGGTG,+,0.00),-64(CAGGTG,+,0.00),-49(CAGGTG,+,0.00),-41(CAGGTG,+,0.00),-17(CAGGTG,+,0.00),-9(CAGGTG,+,0.00),0(CAGGTG,+,0.00),15(CAGGTG,+,0.00),23(CAGGTG,+,0.00),32(CAGGTG,+,0.00),47(CAGGTG,+,0.00),55(CAGGTG,+,0.00),101(CAGGTG,+,0.00),108(CAGGTG,+,0.00),116(CAGGTG,+,0.00),124(CAGGTG,+,0.00),141(CAGGTG,+,0.00)
Merged-chr19-22887208-2	chr19	22887064	22887364		-140(CAGGTG,+,0.00),-104(CAGGTG,+,0.00),-68(CAGGTG,+,0.00),-32(CAGGTG,+,0.00),0(CAGGTG,+,0.00),32(CAGGTG,+,0.00),68(CAGGTG,+,0.00),104(CAGGTG,+,0.00),140(CAGGTG,+,0.00)	-129(CACCTG,+,0.00),-93(CACCTG,+,0.00),-21(CACCTG,+,0.00),11(CACCTG,+,0.00),79(CACCTG,+,0.00),115(CACCTG,+,0.00)
Merged-chr2-128912120-2	chr2	128911982	128912282	-145(CAGCTG,+,0.00),-116(CAGCTG,+,0.00),-87(CAGCTG,+,0.00),29(CAGCTG,+,0.00),58(CAGCTG,+,0.00),87(CAGCTG,+,0.00),116(CAGCTG,+,0.00),145(CAGCTG,+,0.00)	-58(CAGGTG,+,0.00),-29(CAGGTG,+,0.00),0(CAGGTG,+,0.00)
Merged-chr7-36792230-2	chr7	36792089	36792389		-29(CAGGTG,+,0.00),0(CAGGTG,+,0.00)	-75(CACCTG,+,0.00),-64(CACCTG,+,0.00),28(CACCTG,+,0.00)
Merged-chr11-99583455-2	chr11	99583303	99583603	-120(CAGCTG,+,0.00),-105(CAGCTG,+,0.00),-90(CAGCTG,+,0.00),-60(CAGCTG,+,0.00),-30(CAGCTG,+,0.00),0(CAGCTG,+,0.00),30(CAGCTG,+,0.00),60(CAGCTG,+,0.00),75(CAGCTG,+,0.00),90(CAGCTG,+,0.00)	-75(CAGGTG,+,0.00),-45(CAGGTG,+,0.00),-15(CAGGTG,+,0.00),15(CAGGTG,+,0.00),45(CAGGTG,+,0.00)
Merged-chr11-19631234-2	chr11	19631084	19631384	0(CAGCTG,+,0.00),97(CAGCTG,+,0.00)	13(CAGGTG,+,0.00)	-15(CACCTG,+,0.00)
Merged-chr17-8347089-2	chr17	8346936	8347236	-135(CAGCTG,+,0.00),-120(CAGCTG,+,0.00),-105(CAGCTG,+,0.00),-75(CAGCTG,+,0.00),-60(CAGCTG,+,0.00),-45(CAGCTG,+,0.00),-30(CAGCTG,+,0.00),-15(CAGCTG,+,0.00),0(CAGCTG,+,0.00),15(CAGCTG,+,0.00),30(CAGCTG,+,0.00),60(CAGCTG,+,0.00),75(CAGCTG,+,0.00),90(CAGCTG,+,0.00),105(CAGCTG,+,0.00),120(CAGCTG,+,0.00),135(CAGCTG,+,0.00)		-90(CACCTG,+,0.00),45(CACCTG,+,0.00)
Merged-chr11-99591195-2	chr11	99591044	99591344	-60(CAGCTG,+,0.00),-45(CAGCTG,+,0.00),-30(CAGCTG,+,0.00),0(CAGCTG,+,0.00),15(CAGCTG,+,0.00),30(CAGCTG,+,0.00),45(CAGCTG,+,0.00),90(CAGCTG,+,0.00),105(CAGCTG,+,0.00),120(CAGCTG,+,0.00)		-72(CACCTG,+,0.00)
Merged-chr5-53273965-2	chr5	53273809	53274109	-71(CAGCTG,+,0.00),0(CAGCTG,+,0.00),49(CAGCTG,+,0.00),98(CAGCTG,+,0.00)	-59(CAGGTG,+,0.00),136(CAGGTG,+,0.00)
Merged-chr4-133526743-2	chr4	133526598	133526898	11(CAGCTG,+,0.00),47(CAGCTG,+,0.00),83(CAGCTG,+,0.00),119(CAGCTG,+,0.00)	0(CAGGTG,+,0.00),36(CAGGTG,+,0.00),72(CAGGTG,+,0.00),108(CAGGTG,+,0.00),144(CAGGTG,+,0.00)
Merged-chr2-18893492-2	chr2	18893340	18893640		-150(CAGGTG,+,0.00),-132(CAGGTG,+,0.00),-111(CAGGTG,+,0.00),-93(CAGGTG,+,0.00),-72(CAGGTG,+,0.00),-54(CAGGTG,+,0.00),-36(CAGGTG,+,0.00),-18(CAGGTG,+,0.00),0(CAGGTG,+,0.00),18(CAGGTG,+,0.00),36(CAGGTG,+,0.00),54(CAGGTG,+,0.00),75(CAGGTG,+,0.00),93(CAGGTG,+,0.00)
Merged-chr18-81669344-2	chr18	81669191	81669491		-57(CAGGTG,+,0.00),-34(CAGGTG,+,0.00),-23(CAGGTG,+,0.00),0(CAGGTG,+,0.00),34(CAGGTG,+,0.00),45(CAGGTG,+,0.00),68(CAGGTG,+,0.00),79(CAGGTG,+,0.00),102(CAGGTG,+,0.00),113(CAGGTG,+,0.00),136(CAGGTG,+,0.00)
Merged-chr15-85235658-2	chr15	85235512	85235812		-108(CAGGTG,+,0.00),-81(CAGGTG,+,0.00),-54(CAGGTG,+,0.00),-27(CAGGTG,+,0.00),0(CAGGTG,+,0.00),27(CAGGTG,+,0.00),54(CAGGTG,+,0.00),81(CAGGTG,+,0.00)
Merged-chr19-4586890-2	chr19	4586730	4587030		0(CAGGTG,+,0.00),35(CAGGTG,+,0.00),70(CAGGTG,+,0.00),105(CAGGTG,+,0.00),140(CAGGTG,+,0.00)
Merged-chr1-159392296-2	chr1	159392160	159392460		-65(CAGGTG,+,0.00),-32(CAGGTG,+,0.00),0(CAGGTG,+,0.00),32(CAGGTG,+,0.00)
Merged-chr4-153567886-2	chr4	153567729	153568029		-111(CAGGTG,+,0.00),-80(CAGGTG,+,0.00),-61(CAGGTG,+,0.00),-40(CAGGTG,+,0.00),-21(CAGGTG,+,0.00),0(CAGGTG,+,0.00),21(CAGGTG,+,0.00),42(CAGGTG,+,0.00),63(CAGGTG,+,0.00),84(CAGGTG,+,0.00),104(CAGGTG,+,0.00),125(CAGGTG,+,0.00),144(CAGGTG,+,0.00)
Merged-chr8-119851744-2	chr8	119851590	119851890		-143(CAGGTG,+,0.00),-47(CAGGTG,+,0.00),0(CAGGTG,+,0.00),31(CAGGTG,+,0.00),62(CAGGTG,+,0.00),141(CAGGTG,+,0.00)	-127(CACCTG,+,0.00),-111(CACCTG,+,0.00),-95(CACCTG,+,0.00),-79(CACCTG,+,0.00),-63(CACCTG,+,0.00),47(CACCTG,+,0.00),78(CACCTG,+,0.00),94(CACCTG,+,0.00),110(CACCTG,+,0.00)
Merged-chr6-39494323-2	chr6	39494163	39494463		-132(CAGGTG,+,0.00),-99(CAGGTG,+,0.00),-66(CAGGTG,+,0.00),-33(CAGGTG,+,0.00),0(CAGGTG,+,0.00),33(CAGGTG,+,0.00),99(CAGGTG,+,0.00),132(CAGGTG,+,0.00)
Merged-chr2-31869880-2	chr2	31869734	31870034	128(CAGCTG,+,0.00)	-137(CAGGTG,+,0.00),-120(CAGGTG,+,0.00),-80(CAGGTG,+,0.00),-60(CAGGTG,+,0.00),-40(CAGGTG,+,0.00),-20(CAGGTG,+,0.00),0(CAGGTG,+,0.00),20(CAGGTG,+,0.00),37(CAGGTG,+,0.00),54(CAGGTG,+,0.00),74(CAGGTG,+,0.00)
Merged-chr7-139764334-2	chr7	139764186	139764486	-92(CAGCTG,+,0.00),-18(CAGCTG,+,0.00),56(CAGCTG,+,0.00)	-148(CAGGTG,+,0.00),-106(CAGGTG,+,0.00),-74(CAGGTG,+,0.00),-32(CAGGTG,+,0.00),0(CAGGTG,+,0.00),25(CAGGTG,+,0.00),42(CAGGTG,+,0.00),74(CAGGTG,+,0.00),124(CAGGTG,+,0.00)
Merged-chr17-87919301-2	chr17	87919151	87919451		-44(CAGGTG,+,0.00),-22(CAGGTG,+,0.00),0(CAGGTG,+,0.00),22(CAGGTG,+,0.00),88(CAGGTG,+,0.00),110(CAGGTG,+,0.00),132(CAGGTG,+,0.00)
Merged-chr16-32117936-2	chr16	32117790	32118090		-28(CAGGTG,+,0.00),0(CAGGTG,+,0.00),8(CAGGTG,+,0.00),14(CAGGTG,+,0.00),33(CAGGTG,+,0.00),66(CAGGTG,+,0.00)	-41(CACCTG,+,0.00),-17(CACCTG,+,0.00)
Merged-chr13-57947669-2	chr13	57947513	57947813		-119(CAGGTG,+,0.00),-85(CAGGTG,+,0.00),-19(CAGGTG,+,0.00),0(CAGGTG,+,0.00),15(CAGGTG,+,0.00),52(CAGGTG,+,0.00)
Merged-chr10-77836098-2	chr10	77835953	77836253	0(CAGCTG,+,0.00),15(CAGCTG,+,0.00),30(CAGCTG,+,0.00),45(CAGCTG,+,0.00),60(CAGCTG,+,0.00)	-50(CAGGTG,+,0.00)
Merged-chr7-142202409-2	chr7	142202251	142202551	-105(CAGCTG,+,0.00),-90(CAGCTG,+,0.00),-60(CAGCTG,+,0.00),-30(CAGCTG,+,0.00),0(CAGCTG,+,0.00)
Merged-chr7-142280794-2	chr7	142280625	142280925	-129(CAGCTG,+,0.00),-108(CAGCTG,+,0.00),-66(CAGCTG,+,0.00),0(CAGCTG,+,0.00),21(CAGCTG,+,0.00),39(CAGCTG,+,0.00),51(CAGCTG,+,0.00),72(CAGCTG,+,0.00),120(CAGCTG,+,0.00)
Merged-chr15-84791088-2	chr15	84790935	84791235	-128(CAGCTG,+,0.00),-120(CAGCTG,+,0.00),0(CAGCTG,+,0.00),10(CAGCTG,+,0.00),48(CAGCTG,+,0.00),86(CAGCTG,+,0.00),124(CAGCTG,+,0.00)	28(CAGGTG,+,0.00),66(CAGGTG,+,0.00),104(CAGGTG,+,0.00),142(CAGGTG,+,0.00)
Merged-chr11-85969602-2	chr11	85969446	85969746		-33(CAGGTG,+,0.00),0(CAGGTG,+,0.00)	-51(CACCTG,+,0.00),-18(CACCTG,+,0.00),15(CACCTG,+,0.00)
Merged-chr11-99759033-2	chr11	99758859	99759159	-15(CAGCTG,+,0.00)	0(CAGGTG,+,0.00),63(CAGGTG,+,0.00),78(CAGGTG,+,0.00),93(CAGGTG,+,0.00)
Merged-chr1-131178966-2	chr1	131178829	131179129	-76(CAGCTG,+,0.00),-32(CAGCTG,+,0.00),0(CAGCTG,+,0.00),6(CAGCTG,+,0.00),44(CAGCTG,+,0.00),82(CAGCTG,+,0.00),120(CAGCTG,+,0.00)		-96(CACCTG,+,0.00),-58(CACCTG,+,0.00),18(CACCTG,+,0.00),56(CACCTG,+,0.00),94(CACCTG,+,0.00),132(CACCTG,+,0.00)
Merged-chr4-48036134-2	chr4	48035976	48036276		-149(CAGGTG,+,0.00),-129(CAGGTG,+,0.00),-107(CAGGTG,+,0.00),-86(CAGGTG,+,0.00),-64(CAGGTG,+,0.00),-42(CAGGTG,+,0.00),-22(CAGGTG,+,0.00),0(CAGGTG,+,0.00),22(CAGGTG,+,0.00),42(CAGGTG,+,0.00),64(CAGGTG,+,0.00),86(CAGGTG,+,0.00),108(CAGGTG,+,0.00),128(CAGGTG,+,0.00)
Merged-chr1-168306833-2	chr1	168306687	168306987		-99(CAGGTG,+,0.00),-78(CAGGTG,+,0.00),-60(CAGGTG,+,0.00),-39(CAGGTG,+,0.00),-21(CAGGTG,+,0.00),0(CAGGTG,+,0.00),18(CAGGTG,+,0.00),39(CAGGTG,+,0.00),57(CAGGTG,+,0.00),78(CAGGTG,+,0.00),96(CAGGTG,+,0.00),105(CAGGTG,+,0.00)
Merged-chr3-27441020-2	chr3	27440864	27441164		-104(CAGGTG,+,0.00),-69(CAGGTG,+,0.00),-34(CAGGTG,+,0.00),0(CAGGTG,+,0.00),35(CAGGTG,+,0.00),70(CAGGTG,+,0.00),105(CAGGTG,+,0.00),140(CAGGTG,+,0.00)
Merged-chr5-107386659-2	chr5	107386511	107386811		-135(CAGGTG,+,0.00),-108(CAGGTG,+,0.00),-81(CAGGTG,+,0.00),-54(CAGGTG,+,0.00),-27(CAGGTG,+,0.00),0(CAGGTG,+,0.00),27(CAGGTG,+,0.00),54(CAGGTG,+,0.00),108(CAGGTG,+,0.00),135(CAGGTG,+,0.00)
Merged-chr7-19084523-2	chr7	19084364	19084664	-25(CAGCTG,+,0.00),23(CAGCTG,+,0.00)	0(CAGGTG,+,0.00),35(CAGGTG,+,0.00)
Merged-chr2-180545651-2	chr2	180545488	180545788		-145(CAGGTG,+,0.00),-135(CAGGTG,+,0.00),-116(CAGGTG,+,0.00),-106(CAGGTG,+,0.00),-87(CAGGTG,+,0.00),-58(CAGGTG,+,0.00),-48(CAGGTG,+,0.00),-29(CAGGTG,+,0.00),0(CAGGTG,+,0.00),29(CAGGTG,+,0.00),48(CAGGTG,+,0.00),77(CAGGTG,+,0.00),106(CAGGTG,+,0.00),135(CAGGTG,+,0.00)
Merged-chr7-142280325-2	chr7	142280176	142280476	-145(CAGCTG,+,0.00),-54(CAGCTG,+,0.00),0(CAGCTG,+,0.00),30(CAGCTG,+,0.00),60(CAGCTG,+,0.00),120(CAGCTG,+,0.00)
Merged-chr12-112325837-2	chr12	112325687	112325987	-144(CAGCTG,+,0.00),-126(CAGCTG,+,0.00),-108(CAGCTG,+,0.00),-90(CAGCTG,+,0.00),-72(CAGCTG,+,0.00),-36(CAGCTG,+,0.00),-18(CAGCTG,+,0.00),0(CAGCTG,+,0.00),18(CAGCTG,+,0.00),36(CAGCTG,+,0.00),54(CAGCTG,+,0.00)
Merged-chr11-99792804-2	chr11	99792652	99792952	0(CAGCTG,+,0.00),15(CAGCTG,+,0.00),30(CAGCTG,+,0.00),75(CAGCTG,+,0.00)	-90(CAGGTG,+,0.00),-75(CAGGTG,+,0.00),-60(CAGGTG,+,0.00),45(CAGGTG,+,0.00)
Merged-chr10-77814818-2	chr10	77814666	77814966	-30(CAGCTG,+,0.00),-15(CAGCTG,+,0.00),0(CAGCTG,+,0.00),15(CAGCTG,+,0.00),30(CAGCTG,+,0.00),45(CAGCTG,+,0.00)	-80(CAGGTG,+,0.00)
Merged-chr17-66546618-2	chr17	66546463	66546763		-147(CAGGTG,+,0.00),-140(CAGGTG,+,0.00),-126(CAGGTG,+,0.00),-119(CAGGTG,+,0.00),-105(CAGGTG,+,0.00),-84(CAGGTG,+,0.00),-63(CAGGTG,+,0.00),-56(CAGGTG,+,0.00),-42(CAGGTG,+,0.00),-35(CAGGTG,+,0.00),-21(CAGGTG,+,0.00),0(CAGGTG,+,0.00),42(CAGGTG,+,0.00),63(CAGGTG,+,0.00),70(CAGGTG,+,0.00),84(CAGGTG,+,0.00),105(CAGGTG,+,0.00),126(CAGGTG,+,0.00),133(CAGGTG,+,0.00)
Merged-chr17-14557416-2	chr17	14557267	14557567	-9(CAGCTG,+,0.00),0(CAGCTG,+,0.00),9(CAGCTG,+,0.00),18(CAGCTG,+,0.00),27(CAGCTG,+,0.00),52(CAGCTG,+,0.00)
Merged-chr11-59640407-2	chr11	59640249	59640549		-134(CAGGTG,+,0.00),-115(CAGGTG,+,0.00),-95(CAGGTG,+,0.00),-76(CAGGTG,+,0.00),-57(CAGGTG,+,0.00),-38(CAGGTG,+,0.00),0(CAGGTG,+,0.00),19(CAGGTG,+,0.00),38(CAGGTG,+,0.00),57(CAGGTG,+,0.00),76(CAGGTG,+,0.00)
Merged-chr3-104438977-2	chr3	104438818	104439118		0(CAGGTG,+,0.00)	-114(CACCTG,+,0.00),41(CACCTG,+,0.00)
Merged-chr2-32809447-2	chr2	32809295	32809595		-72(CAGGTG,+,0.00),0(CAGGTG,+,0.00)	-19(CACCTG,+,0.00),33(CACCTG,+,0.00)
Merged-chr17-66546056-2	chr17	66545917	66546217		-147(CAGGTG,+,0.00),-140(CAGGTG,+,0.00),-126(CAGGTG,+,0.00),-105(CAGGTG,+,0.00),-98(CAGGTG,+,0.00),-84(CAGGTG,+,0.00),-63(CAGGTG,+,0.00),-21(CAGGTG,+,0.00),0(CAGGTG,+,0.00),28(CAGGTG,+,0.00),42(CAGGTG,+,0.00),49(CAGGTG,+,0.00),63(CAGGTG,+,0.00),84(CAGGTG,+,0.00),105(CAGGTG,+,0.00),112(CAGGTG,+,0.00),126(CAGGTG,+,0.00),133(CAGGTG,+,0.00)
Merged-chr6-142838315-2	chr6	142838162	142838462		-51(CAGGTG,+,0.00),-17(CAGGTG,+,0.00),0(CAGGTG,+,0.00),17(CAGGTG,+,0.00),34(CAGGTG,+,0.00),51(CAGGTG,+,0.00),68(CAGGTG,+,0.00),85(CAGGTG,+,0.00),102(CAGGTG,+,0.00),119(CAGGTG,+,0.00),136(CAGGTG,+,0.00)	-65(CACCTG,+,0.00)
Merged-chr17-7271715-2	chr17	7271570	7271870	0(CAGCTG,+,0.00),52(CAGCTG,+,0.00),85(CAGCTG,+,0.00)	-131(CAGGTG,+,0.00)
Merged-chr10-27807969-2	chr10	27807803	27808103		-77(CAGGTG,+,0.00),-66(CAGGTG,+,0.00),-55(CAGGTG,+,0.00),-44(CAGGTG,+,0.00),-33(CAGGTG,+,0.00),0(CAGGTG,+,0.00),11(CAGGTG,+,0.00),22(CAGGTG,+,0.00)
Merged-chr2-105257885-2	chr2	105257741	105258041		-131(CAGGTG,+,0.00),-117(CAGGTG,+,0.00),-78(CAGGTG,+,0.00),-53(CAGGTG,+,0.00),-39(CAGGTG,+,0.00),-14(CAGGTG,+,0.00),0(CAGGTG,+,0.00),39(CAGGTG,+,0.00),64(CAGGTG,+,0.00),78(CAGGTG,+,0.00),117(CAGGTG,+,0.00)
Merged-chr10-77690600-2	chr10	77690450	77690750	-102(CAGCTG,+,0.00),-87(CAGCTG,+,0.00),-57(CAGCTG,+,0.00),-42(CAGCTG,+,0.00),-27(CAGCTG,+,0.00),0(CAGCTG,+,0.00)		53(CACCTG,+,0.00)
Merged-chr3-97026414-2	chr3	97026266	97026566		-72(CAGGTG,+,0.00),-64(CAGGTG,+,0.00),-48(CAGGTG,+,0.00),-40(CAGGTG,+,0.00),-24(CAGGTG,+,0.00),-16(CAGGTG,+,0.00),0(CAGGTG,+,0.00),8(CAGGTG,+,0.00),32(CAGGTG,+,0.00),48(CAGGTG,+,0.00),56(CAGGTG,+,0.00),72(CAGGTG,+,0.00),80(CAGGTG,+,0.00),96(CAGGTG,+,0.00)
Merged-chr11-29774491-2	chr11	29774325	29774625	-101(CAGCTG,+,0.00),-65(CAGCTG,+,0.00),0(CAGCTG,+,0.00),34(CAGCTG,+,0.00)
Merged-chr9-62821029-2	chr9	62820889	62821189	-28(CAGCTG,+,0.00),0(CAGCTG,+,0.00)		-81(CACCTG,+,0.00),37(CACCTG,+,0.00)
Merged-chr14-118872316-2	chr14	118872167	118872467	-33(CAGCTG,+,0.00),0(CAGCTG,+,0.00),17(CAGCTG,+,0.00)		-14(CACCTG,+,0.00),24(CACCTG,+,0.00)
Merged-chr15-101117056-2	chr15	101116901	101117201		-28(CAGGTG,+,0.00),-14(CAGGTG,+,0.00),0(CAGGTG,+,0.00),28(CAGGTG,+,0.00),42(CAGGTG,+,0.00),56(CAGGTG,+,0.00),70(CAGGTG,+,0.00),84(CAGGTG,+,0.00)
Merged-chr8-13503522-2	chr8	13503366	13503666		-96(CAGGTG,+,0.00),-80(CAGGTG,+,0.00),-64(CAGGTG,+,0.00),-48(CAGGTG,+,0.00),-32(CAGGTG,+,0.00),-16(CAGGTG,+,0.00),0(CAGGTG,+,0.00),16(CAGGTG,+,0.00),32(CAGGTG,+,0.00),48(CAGGTG,+,0.00),64(CAGGTG,+,0.00),80(CAGGTG,+,0.00),96(CAGGTG,+,0.00),128(CAGGTG,+,0.00),144(CAGGTG,+,0.00)
Merged-chr5-52424990-2	chr5	52424835	52425135		-24(CAGGTG,+,0.00),-12(CAGGTG,+,0.00),0(CAGGTG,+,0.00),12(CAGGTG,+,0.00),24(CAGGTG,+,0.00),36(CAGGTG,+,0.00),60(CAGGTG,+,0.00),72(CAGGTG,+,0.00),86(CAGGTG,+,0.00),98(CAGGTG,+,0.00)
Merged-chr11-99879521-2	chr11	99879375	99879675	-87(CAGCTG,+,0.00),-42(CAGCTG,+,0.00),-15(CAGCTG,+,0.00),0(CAGCTG,+,0.00),15(CAGCTG,+,0.00),30(CAGCTG,+,0.00),60(CAGCTG,+,0.00),90(CAGCTG,+,0.00),132(CAGCTG,+,0.00)	75(CAGGTG,+,0.00)	-126(CACCTG,+,0.00)
Merged-chr11-99614441-2	chr11	99614269	99614569	109(CAGCTG,+,0.00)	-24(CAGGTG,+,0.00),0(CAGGTG,+,0.00),75(CAGGTG,+,0.00),132(CAGGTG,+,0.00)
Merged-chr11-69362186-2	chr11	69362029	69362329	-36(CAGCTG,+,0.00),0(CAGCTG,+,0.00),21(CAGCTG,+,0.00)	14(CAGGTG,+,0.00)
Merged-chr7-142174961-2	chr7	142174802	142175102	-60(CAGCTG,+,0.00),-30(CAGCTG,+,0.00),0(CAGCTG,+,0.00),15(CAGCTG,+,0.00),45(CAGCTG,+,0.00),75(CAGCTG,+,0.00)
Merged-chr14-34209271-2	chr14	34209126	34209426	-9(CAGCTG,+,0.00)	0(CAGGTG,+,0.00)	-135(CACCTG,+,0.00)
Merged-chr2-179392058-2	chr2	179391927	179392227	-133(CAGCTG,+,0.00),-107(CAGCTG,+,0.00),-86(CAGCTG,+,0.00),-65(CAGCTG,+,0.00),-43(CAGCTG,+,0.00),0(CAGCTG,+,0.00),21(CAGCTG,+,0.00),42(CAGCTG,+,0.00),63(CAGCTG,+,0.00),85(CAGCTG,+,0.00),106(CAGCTG,+,0.00),127(CAGCTG,+,0.00)
Merged-chr9-66869751-2	chr9	66869612	66869912		-36(CAGGTG,+,0.00),-24(CAGGTG,+,0.00),-12(CAGGTG,+,0.00),0(CAGGTG,+,0.00)
Merged-chr9-120588664-2	chr9	120588519	120588819		-51(CAGGTG,+,0.00),-32(CAGGTG,+,0.00),0(CAGGTG,+,0.00),32(CAGGTG,+,0.00),64(CAGGTG,+,0.00),96(CAGGTG,+,0.00)	-18(CACCTG,+,0.00),14(CACCTG,+,0.00),46(CACCTG,+,0.00),78(CACCTG,+,0.00)
Merged-chr7-64235490-2	chr7	64235351	64235651		-137(CAGGTG,+,0.00),-84(CAGGTG,+,0.00),-42(CAGGTG,+,0.00),0(CAGGTG,+,0.00),31(CAGGTG,+,0.00),42(CAGGTG,+,0.00),73(CAGGTG,+,0.00),115(CAGGTG,+,0.00),126(CAGGTG,+,0.00)	-144(CACCTG,+,0.00),-102(CACCTG,+,0.00),-60(CACCTG,+,0.00),-18(CACCTG,+,0.00),24(CACCTG,+,0.00),66(CACCTG,+,0.00),108(CACCTG,+,0.00)
Merged-chr1-187171588-2	chr1	187171439	187171739	-134(CAGCTG,+,0.00),-100(CAGCTG,+,0.00),-80(CAGCTG,+,0.00),-60(CAGCTG,+,0.00),-40(CAGCTG,+,0.00),-20(CAGCTG,+,0.00),0(CAGCTG,+,0.00),20(CAGCTG,+,0.00),40(CAGCTG,+,0.00),60(CAGCTG,+,0.00),80(CAGCTG,+,0.00),100(CAGCTG,+,0.00),120(CAGCTG,+,0.00),140(CAGCTG,+,0.00)
Merged-chr5-135970442-2	chr5	135970279	135970579	0(CAGCTG,+,0.00),13(CAGCTG,+,0.00),55(CAGCTG,+,0.00)		-58(CACCTG,+,0.00)
Merged-chr15-36507959-1	chr15	36507804	36508104	46(CAGCTG,+,0.00)	-84(CAGGTG,+,0.00),-57(CAGGTG,+,0.00),-38(CAGGTG,+,0.00),-19(CAGGTG,+,0.00),0(CAGGTG,+,0.00),38(CAGGTG,+,0.00),57(CAGGTG,+,0.00)
Merged-chr15-98851692-2	chr15	98851554	98851854	-15(CAGCTG,+,0.00),-6(CAGCTG,+,0.00),59(CAGCTG,+,0.00)	0(CAGGTG,+,0.00)
Merged-chr11-99873749-2	chr11	99873607	99873907	-117(CAGCTG,+,0.00),-72(CAGCTG,+,0.00),-45(CAGCTG,+,0.00),-30(CAGCTG,+,0.00),0(CAGCTG,+,0.00),30(CAGCTG,+,0.00)	15(CAGGTG,+,0.00)
Merged-chr5-92016988-2	chr5	92016857	92017157		-96(CAGGTG,+,0.00),-85(CAGGTG,+,0.00),-64(CAGGTG,+,0.00),-32(CAGGTG,+,0.00),-21(CAGGTG,+,0.00),0(CAGGTG,+,0.00),64(CAGGTG,+,0.00),96(CAGGTG,+,0.00),128(CAGGTG,+,0.00)
Merged-chr4-131283901-2	chr4	131283771	131284071	22(CAGCTG,+,0.00)	-70(CAGGTG,+,0.00),-43(CAGGTG,+,0.00),0(CAGGTG,+,0.00)
Merged-chr7-45226364-2	chr7	45226217	45226517		-26(CAGGTG,+,0.00),-13(CAGGTG,+,0.00),0(CAGGTG,+,0.00),13(CAGGTG,+,0.00),39(CAGGTG,+,0.00),68(CAGGTG,+,0.00)
Merged-chr2-173292753-2	chr2	173292604	173292904	130(CAGCTG,+,0.00)	-42(CAGGTG,+,0.00),-29(CAGGTG,+,0.00),-13(CAGGTG,+,0.00),0(CAGGTG,+,0.00),16(CAGGTG,+,0.00),32(CAGGTG,+,0.00)
Merged-chr9-65545000-2	chr9	65544841	65545141		-104(CAGGTG,+,0.00),-78(CAGGTG,+,0.00),-52(CAGGTG,+,0.00),-26(CAGGTG,+,0.00),0(CAGGTG,+,0.00),26(CAGGTG,+,0.00),78(CAGGTG,+,0.00)
Merged-chr1-153184132-2	chr1	153183984	153184284		-26(CAGGTG,+,0.00),-13(CAGGTG,+,0.00),0(CAGGTG,+,0.00),13(CAGGTG,+,0.00),26(CAGGTG,+,0.00),39(CAGGTG,+,0.00),52(CAGGTG,+,0.00)	-81(CACCTG,+,0.00)
Merged-chr11-116141084-2	chr11	116140953	116141253		-42(CAGGTG,+,0.00),0(CAGGTG,+,0.00),41(CAGGTG,+,0.00),123(CAGGTG,+,0.00)
Merged-chr11-119586007-2	chr11	119585858	119586158	-56(CAGCTG,+,0.00),0(CAGCTG,+,0.00)		34(CACCTG,+,0.00)
Merged-chr15-100414158-2	chr15	100414019	100414319	0(CAGCTG,+,0.00)		91(CACCTG,+,0.00)
Merged-chr7-143338822-2	chr7	143338684	143338984	-63(CAGCTG,+,0.00),-32(CAGCTG,+,0.00),112(CAGCTG,+,0.00)	0(CAGGTG,+,0.00)
Merged-chr2-11593639-2	chr2	11593502	11593802	0(CAGCTG,+,0.00),32(CAGCTG,+,0.00),64(CAGCTG,+,0.00),96(CAGCTG,+,0.00),128(CAGCTG,+,0.00)
Merged-chr3-101831723-2	chr3	101831575	101831875	0(CAGCTG,+,0.00)		-15(CACCTG,+,0.00)
Merged-chr5-144022840-2	chr5	144022675	144022975		-150(CAGGTG,+,0.00),-135(CAGGTG,+,0.00),-120(CAGGTG,+,0.00),-105(CAGGTG,+,0.00),-90(CAGGTG,+,0.00),-75(CAGGTG,+,0.00),-60(CAGGTG,+,0.00),-45(CAGGTG,+,0.00),-30(CAGGTG,+,0.00),-15(CAGGTG,+,0.00),0(CAGGTG,+,0.00),45(CAGGTG,+,0.00),60(CAGGTG,+,0.00),75(CAGGTG,+,0.00),90(CAGGTG,+,0.00),105(CAGGTG,+,0.00)
Merged-chr2-31957424-2	chr2	31957291	31957591	-43(CAGCTG,+,0.00),0(CAGCTG,+,0.00)		-74(CACCTG,+,0.00),39(CACCTG,+,0.00)
Merged-chr6-147788318-2	chr6	147788163	147788463		-60(CAGGTG,+,0.00),-36(CAGGTG,+,0.00),-24(CAGGTG,+,0.00),0(CAGGTG,+,0.00),12(CAGGTG,+,0.00)
Merged-chr10-76426609-2	chr10	76426462	76426762	25(CAGCTG,+,0.00)	-12(CAGGTG,+,0.00),0(CAGGTG,+,0.00)
Merged-chr17-46093355-2	chr17	46093202	46093502		-60(CAGGTG,+,0.00),-42(CAGGTG,+,0.00),-30(CAGGTG,+,0.00),-12(CAGGTG,+,0.00),0(CAGGTG,+,0.00),17(CAGGTG,+,0.00),46(CAGGTG,+,0.00),58(CAGGTG,+,0.00),76(CAGGTG,+,0.00),88(CAGGTG,+,0.00),118(CAGGTG,+,0.00)
Merged-chr15-99890993-2	chr15	99890832	99891132	0(CAGCTG,+,0.00)	29(CAGGTG,+,0.00)	-94(CACCTG,+,0.00)
Merged-chr4-11053935-2	chr4	11053801	11054101	-149(CAGCTG,+,0.00),-104(CAGCTG,+,0.00),-59(CAGCTG,+,0.00),-14(CAGCTG,+,0.00)	-135(CAGGTG,+,0.00),-90(CAGGTG,+,0.00),-45(CAGGTG,+,0.00),0(CAGGTG,+,0.00)
Merged-chr9-13957338-2	chr9	13957186	13957486		-62(CAGGTG,+,0.00),-55(CAGGTG,+,0.00),-44(CAGGTG,+,0.00),-33(CAGGTG,+,0.00),-22(CAGGTG,+,0.00),-11(CAGGTG,+,0.00),0(CAGGTG,+,0.00),7(CAGGTG,+,0.00),25(CAGGTG,+,0.00),36(CAGGTG,+,0.00)
Merged-chr6-84273812-2	chr6	84273672	84273972	-84(CAGCTG,+,0.00),105(CAGCTG,+,0.00)	-105(CAGGTG,+,0.00),-94(CAGGTG,+,0.00),-63(CAGGTG,+,0.00),-42(CAGGTG,+,0.00),0(CAGGTG,+,0.00),21(CAGGTG,+,0.00),42(CAGGTG,+,0.00),63(CAGGTG,+,0.00),84(CAGGTG,+,0.00),126(CAGGTG,+,0.00)
Merged-chr7-139851795-2	chr7	139851642	139851942		-39(CAGGTG,+,0.00),-26(CAGGTG,+,0.00),-13(CAGGTG,+,0.00),0(CAGGTG,+,0.00),52(CAGGTG,+,0.00),104(CAGGTG,+,0.00)
Merged-chr6-29879752-1	chr6	29879608	29879908		-75(CAGGTG,+,0.00),-50(CAGGTG,+,0.00),-25(CAGGTG,+,0.00),0(CAGGTG,+,0.00),25(CAGGTG,+,0.00),50(CAGGTG,+,0.00),75(CAGGTG,+,0.00),125(CAGGTG,+,0.00)
Merged-chr10-77742447-2	chr10	77742304	77742604	-120(CAGCTG,+,0.00),-105(CAGCTG,+,0.00),-75(CAGCTG,+,0.00),-45(CAGCTG,+,0.00),-30(CAGCTG,+,0.00),0(CAGCTG,+,0.00),30(CAGCTG,+,0.00)
Merged-chr19-57670878-2	chr19	57670728	57671028	60(CAGCTG,+,0.00),140(CAGCTG,+,0.00)	-20(CAGGTG,+,0.00),0(CAGGTG,+,0.00),20(CAGGTG,+,0.00),40(CAGGTG,+,0.00),80(CAGGTG,+,0.00),100(CAGGTG,+,0.00),120(CAGGTG,+,0.00)
Merged-chr8-70429246-2	chr8	70429088	70429388		-136(CAGGTG,+,0.00),-105(CAGGTG,+,0.00),-75(CAGGTG,+,0.00),-20(CAGGTG,+,0.00),0(CAGGTG,+,0.00),11(CAGGTG,+,0.00),66(CAGGTG,+,0.00),97(CAGGTG,+,0.00),130(CAGGTG,+,0.00)
Merged-chr2-29755875-2	chr2	29755714	29756014		0(CAGGTG,+,0.00)	33(CACCTG,+,0.00),75(CACCTG,+,0.00)
Merged-chr1-89628488-2	chr1	89628332	89628632		-95(CAGGTG,+,0.00),-76(CAGGTG,+,0.00),-57(CAGGTG,+,0.00),-38(CAGGTG,+,0.00),-19(CAGGTG,+,0.00),0(CAGGTG,+,0.00),19(CAGGTG,+,0.00),38(CAGGTG,+,0.00),57(CAGGTG,+,0.00),95(CAGGTG,+,0.00)
Merged-chr7-25171047-2	chr7	25170897	25171197	-114(CAGCTG,+,0.00)	-14(CAGGTG,+,0.00),0(CAGGTG,+,0.00),14(CAGGTG,+,0.00),28(CAGGTG,+,0.00),42(CAGGTG,+,0.00)
Merged-chr14-63179734-2	chr14	63179601	63179901	-125(CAGCTG,+,0.00),-41(CAGCTG,+,0.00),0(CAGCTG,+,0.00),27(CAGCTG,+,0.00)		58(CACCTG,+,0.00)
Merged-chr2-170465780-2	chr2	170465626	170465926		-30(CAGGTG,+,0.00),0(CAGGTG,+,0.00),30(CAGGTG,+,0.00),60(CAGGTG,+,0.00)	-82(CACCTG,+,0.00),-44(CACCTG,+,0.00),-14(CACCTG,+,0.00),16(CACCTG,+,0.00),46(CACCTG,+,0.00),76(CACCTG,+,0.00)
Merged-chr12-102344660-2	chr12	102344515	102344815		-140(CAGGTG,+,0.00),-126(CAGGTG,+,0.00),-112(CAGGTG,+,0.00),-98(CAGGTG,+,0.00),-84(CAGGTG,+,0.00),-70(CAGGTG,+,0.00),-56(CAGGTG,+,0.00),-42(CAGGTG,+,0.00),-28(CAGGTG,+,0.00),-14(CAGGTG,+,0.00),0(CAGGTG,+,0.00),14(CAGGTG,+,0.00),28(CAGGTG,+,0.00),42(CAGGTG,+,0.00),56(CAGGTG,+,0.00),70(CAGGTG,+,0.00),84(CAGGTG,+,0.00),98(CAGGTG,+,0.00),112(CAGGTG,+,0.00),126(CAGGTG,+,0.00),140(CAGGTG,+,0.00)
Merged-chr2-29261358-2	chr2	29261202	29261502		0(CAGGTG,+,0.00)	-36(CACCTG,+,0.00)
Merged-chr11-117986194-2	chr11	117986039	117986339	25(CAGCTG,+,0.00),99(CAGCTG,+,0.00)	-144(CAGGTG,+,0.00),-94(CAGGTG,+,0.00),-51(CAGGTG,+,0.00),0(CAGGTG,+,0.00),40(CAGGTG,+,0.00)
Merged-chr4-126116085-2	chr4	126115933	126116233	0(CAGCTG,+,0.00),51(CAGCTG,+,0.00)	24(CAGGTG,+,0.00)	83(CACCTG,+,0.00)
Merged-chr10-58925057-2	chr10	58924904	58925204	-144(CAGCTG,+,0.00),-128(CAGCTG,+,0.00),-112(CAGCTG,+,0.00),-96(CAGCTG,+,0.00),-80(CAGCTG,+,0.00),-64(CAGCTG,+,0.00),-48(CAGCTG,+,0.00),-16(CAGCTG,+,0.00),0(CAGCTG,+,0.00),16(CAGCTG,+,0.00),32(CAGCTG,+,0.00),48(CAGCTG,+,0.00),80(CAGCTG,+,0.00),96(CAGCTG,+,0.00),112(CAGCTG,+,0.00),128(CAGCTG,+,0.00)
Merged-chr11-60722850-2	chr11	60722694	60722994	117(CAGCTG,+,0.00)	-131(CAGGTG,+,0.00),-112(CAGGTG,+,0.00),-93(CAGGTG,+,0.00),-81(CAGGTG,+,0.00),-62(CAGGTG,+,0.00),-50(CAGGTG,+,0.00),-31(CAGGTG,+,0.00),-19(CAGGTG,+,0.00),0(CAGGTG,+,0.00),12(CAGGTG,+,0.00),31(CAGGTG,+,0.00),50(CAGGTG,+,0.00)
Merged-chr2-167074808-2	chr2	167074643	167074943	-99(CAGCTG,+,0.00)	-33(CAGGTG,+,0.00),0(CAGGTG,+,0.00),33(CAGGTG,+,0.00)
Merged-chr15-83673224-2	chr15	83673070	83673370		-48(CAGGTG,+,0.00),-36(CAGGTG,+,0.00),-24(CAGGTG,+,0.00),-12(CAGGTG,+,0.00),0(CAGGTG,+,0.00),12(CAGGTG,+,0.00),24(CAGGTG,+,0.00),36(CAGGTG,+,0.00),48(CAGGTG,+,0.00),60(CAGGTG,+,0.00),72(CAGGTG,+,0.00)
Merged-chr8-70533392-2	chr8	70533234	70533534		-140(CAGGTG,+,0.00),-120(CAGGTG,+,0.00),-100(CAGGTG,+,0.00),-80(CAGGTG,+,0.00),-60(CAGGTG,+,0.00),-40(CAGGTG,+,0.00),-20(CAGGTG,+,0.00),0(CAGGTG,+,0.00),20(CAGGTG,+,0.00),60(CAGGTG,+,0.00),80(CAGGTG,+,0.00),100(CAGGTG,+,0.00),120(CAGGTG,+,0.00)
Merged-chr13-48944747-2	chr13	48944595	48944895	20(CAGCTG,+,0.00)	0(CAGGTG,+,0.00)	9(CACCTG,+,0.00),56(CACCTG,+,0.00)
Merged-chr4-131912766-2	chr4	131912617	131912917	11(CAGCTG,+,0.00),51(CAGCTG,+,0.00)	0(CAGGTG,+,0.00),20(CAGGTG,+,0.00),40(CAGGTG,+,0.00)
Merged-chr4-43371950-2	chr4	43371790	43372090	-30(CAGCTG,+,0.00),0(CAGCTG,+,0.00),30(CAGCTG,+,0.00),60(CAGCTG,+,0.00),90(CAGCTG,+,0.00),120(CAGCTG,+,0.00)
Merged-chr1-125389874-2	chr1	125389735	125390035	-120(CAGCTG,+,0.00),-90(CAGCTG,+,0.00),-60(CAGCTG,+,0.00),-30(CAGCTG,+,0.00),0(CAGCTG,+,0.00),60(CAGCTG,+,0.00),90(CAGCTG,+,0.00)
Merged-chr4-155785165-2	chr4	155785027	155785327	-39(CAGCTG,+,0.00),0(CAGCTG,+,0.00)
Merged-chr4-107713110-2	chr4	107712961	107713261		-73(CAGGTG,+,0.00),-57(CAGGTG,+,0.00),-19(CAGGTG,+,0.00),0(CAGGTG,+,0.00),19(CAGGTG,+,0.00),54(CAGGTG,+,0.00),89(CAGGTG,+,0.00),127(CAGGTG,+,0.00)
Merged-chr17-87272660-2	chr17	87272510	87272810		-102(CAGGTG,+,0.00),-88(CAGGTG,+,0.00),-73(CAGGTG,+,0.00),-29(CAGGTG,+,0.00),0(CAGGTG,+,0.00),42(CAGGTG,+,0.00)
Merged-chr12-105005676-2	chr12	105005529	105005829		0(CAGGTG,+,0.00),122(CAGGTG,+,0.00),131(CAGGTG,+,0.00)	-65(CACCTG,+,0.00),-50(CACCTG,+,0.00),65(CACCTG,+,0.00)
Merged-chr5-35186358-2	chr5	35186204	35186504		0(CAGGTG,+,0.00),24(CAGGTG,+,0.00)
Merged-chr2-171844962-1	chr2	171844799	171845099		-49(CAGGTG,+,0.00),-37(CAGGTG,+,0.00),-25(CAGGTG,+,0.00),-12(CAGGTG,+,0.00),0(CAGGTG,+,0.00)
Merged-chr17-28557959-2	chr17	28557786	28558086		0(CAGGTG,+,0.00)	-38(CACCTG,+,0.00),79(CACCTG,+,0.00)
Merged-chr17-69095670-2	chr17	69095512	69095812	128(CAGCTG,+,0.00)	-138(CAGGTG,+,0.00),-115(CAGGTG,+,0.00),-92(CAGGTG,+,0.00),-69(CAGGTG,+,0.00),-46(CAGGTG,+,0.00),-23(CAGGTG,+,0.00),0(CAGGTG,+,0.00),23(CAGGTG,+,0.00)
Merged-chr5-115983339-2	chr5	115983198	115983498		-46(CAGGTG,+,0.00),-28(CAGGTG,+,0.00),0(CAGGTG,+,0.00),14(CAGGTG,+,0.00),28(CAGGTG,+,0.00),42(CAGGTG,+,0.00)
Merged-chr2-35565621-1	chr2	35565466	35565766		-70(CAGGTG,+,0.00),-52(CAGGTG,+,0.00),-26(CAGGTG,+,0.00),0(CAGGTG,+,0.00),13(CAGGTG,+,0.00)
Merged-chr10-81242216-1	chr10	81242063	81242363	0(CAGCTG,+,0.00)		-120(CACCTG,+,0.00),-25(CACCTG,+,0.00)
Merged-chr2-130875312-2	chr2	130875179	130875479		-142(CAGGTG,+,0.00),-94(CAGGTG,+,0.00),-46(CAGGTG,+,0.00),0(CAGGTG,+,0.00),24(CAGGTG,+,0.00),48(CAGGTG,+,0.00),72(CAGGTG,+,0.00),96(CAGGTG,+,0.00),120(CAGGTG,+,0.00),143(CAGGTG,+,0.00)
Merged-chr12-108848183-2	chr12	108848022	108848322		-104(CAGGTG,+,0.00),-52(CAGGTG,+,0.00),0(CAGGTG,+,0.00),52(CAGGTG,+,0.00)	-145(CACCTG,+,0.00),-93(CACCTG,+,0.00),-41(CACCTG,+,0.00),11(CACCTG,+,0.00),63(CACCTG,+,0.00)
Merged-chr10-91678811-2	chr10	91678656	91678956	-41(CAGCTG,+,0.00)	0(CAGGTG,+,0.00),13(CAGGTG,+,0.00)
Merged-chr1-27108951-2	chr1	27108806	27109106		-60(CAGGTG,+,0.00),-45(CAGGTG,+,0.00),-30(CAGGTG,+,0.00),-15(CAGGTG,+,0.00),0(CAGGTG,+,0.00),15(CAGGTG,+,0.00),30(CAGGTG,+,0.00),45(CAGGTG,+,0.00),60(CAGGTG,+,0.00),75(CAGGTG,+,0.00)
Merged-chr11-108119999-2	chr11	108119856	108120156		-61(CAGGTG,+,0.00),-32(CAGGTG,+,0.00),0(CAGGTG,+,0.00),32(CAGGTG,+,0.00),64(CAGGTG,+,0.00)	-41(CACCTG,+,0.00),-9(CACCTG,+,0.00),23(CACCTG,+,0.00),55(CACCTG,+,0.00),87(CACCTG,+,0.00)
Merged-chr4-134494407-2	chr4	134494234	134494534		0(CAGGTG,+,0.00),48(CAGGTG,+,0.00)	55(CACCTG,+,0.00)
Merged-chr4-151486282-2	chr4	151486125	151486425	141(CAGCTG,+,0.00)	0(CAGGTG,+,0.00)
Merged-chr17-25656316-2	chr17	25656177	25656477	0(CAGCTG,+,0.00),22(CAGCTG,+,0.00),55(CAGCTG,+,0.00)		6(CACCTG,+,0.00)
Merged-chr4-151295697-1	chr4	151295567	151295867	-61(CAGCTG,+,0.00),0(CAGCTG,+,0.00),32(CAGCTG,+,0.00)		15(CACCTG,+,0.00)
Merged-chr1-182116238-2	chr1	182116093	182116393	-87(CAGCTG,+,0.00),0(CAGCTG,+,0.00)		-20(CACCTG,+,0.00)
Merged-chr2-168423270-2	chr2	168423123	168423423		-48(CAGGTG,+,0.00),-32(CAGGTG,+,0.00),-16(CAGGTG,+,0.00),0(CAGGTG,+,0.00),16(CAGGTG,+,0.00),32(CAGGTG,+,0.00),48(CAGGTG,+,0.00),64(CAGGTG,+,0.00),80(CAGGTG,+,0.00),96(CAGGTG,+,0.00),112(CAGGTG,+,0.00),128(CAGGTG,+,0.00),144(CAGGTG,+,0.00)
Merged-chr4-130915807-2	chr4	130915653	130915953		-11(CAGGTG,+,0.00),0(CAGGTG,+,0.00)
Merged-chr7-142251380-2	chr7	142251234	142251534	-69(CAGCTG,+,0.00),0(CAGCTG,+,0.00),42(CAGCTG,+,0.00),63(CAGCTG,+,0.00)	-33(CAGGTG,+,0.00),144(CAGGTG,+,0.00)
Merged-chr4-148122594-2	chr4	148122442	148122742	0(CAGCTG,+,0.00)		-17(CACCTG,+,0.00)
Merged-chr2-93433102-2	chr2	93432936	93433236	-96(CAGCTG,+,0.00),-83(CAGCTG,+,0.00),-55(CAGCTG,+,0.00),0(CAGCTG,+,0.00)
Merged-chr11-96900087-2	chr11	96899941	96900241	0(CAGCTG,+,0.00),11(CAGCTG,+,0.00)
Merged-chr15-100965170-2	chr15	100965010	100965310		-129(CAGGTG,+,0.00),-63(CAGGTG,+,0.00),-44(CAGGTG,+,0.00),-22(CAGGTG,+,0.00),0(CAGGTG,+,0.00),22(CAGGTG,+,0.00),44(CAGGTG,+,0.00),66(CAGGTG,+,0.00),110(CAGGTG,+,0.00),132(CAGGTG,+,0.00)
Merged-chr15-84411169-2	chr15	84411013	84411313		-38(CAGGTG,+,0.00),0(CAGGTG,+,0.00),38(CAGGTG,+,0.00),76(CAGGTG,+,0.00),114(CAGGTG,+,0.00)	-22(CACCTG,+,0.00),54(CACCTG,+,0.00),92(CACCTG,+,0.00),130(CACCTG,+,0.00)
Merged-chr6-84274616-1	chr6	84274448	84274748	-126(CAGCTG,+,0.00),-84(CAGCTG,+,0.00),-63(CAGCTG,+,0.00),-42(CAGCTG,+,0.00)	-147(CAGGTG,+,0.00),-105(CAGGTG,+,0.00),-94(CAGGTG,+,0.00),-21(CAGGTG,+,0.00),0(CAGGTG,+,0.00)
Merged-chr8-20096993-2	chr8	20096861	20097161		0(CAGGTG,+,0.00)
Merged-chr7-120882870-2	chr7	120882714	120883014	-32(CAGCTG,+,0.00),0(CAGCTG,+,0.00),22(CAGCTG,+,0.00)
Merged-chr19-44904553-2	chr19	44904408	44904708	-74(CAGCTG,+,0.00),0(CAGCTG,+,0.00),19(CAGCTG,+,0.00),28(CAGCTG,+,0.00)	-98(CAGGTG,+,0.00)
Merged-chr16-10652067-2	chr16	10651927	10652227		0(CAGGTG,+,0.00),39(CAGGTG,+,0.00)
Merged-chr4-140197259-1	chr4	140197108	140197408	-124(CAGCTG,+,0.00),0(CAGCTG,+,0.00)	-90(CAGGTG,+,0.00)	22(CACCTG,+,0.00)
Merged-chr4-107429544-2	chr4	107429391	107429691		-48(CAGGTG,+,0.00),-32(CAGGTG,+,0.00),-16(CAGGTG,+,0.00),0(CAGGTG,+,0.00),16(CAGGTG,+,0.00),32(CAGGTG,+,0.00)
Merged-chr7-132431303-2	chr7	132431144	132431444	-145(CAGCTG,+,0.00),-116(CAGCTG,+,0.00),-87(CAGCTG,+,0.00),-58(CAGCTG,+,0.00),-29(CAGCTG,+,0.00),0(CAGCTG,+,0.00),58(CAGCTG,+,0.00),87(CAGCTG,+,0.00),145(CAGCTG,+,0.00)
Merged-chr16-52083993-2	chr16	52083822	52084122		-132(CAGGTG,+,0.00),-110(CAGGTG,+,0.00),-66(CAGGTG,+,0.00),-44(CAGGTG,+,0.00),-22(CAGGTG,+,0.00),0(CAGGTG,+,0.00),44(CAGGTG,+,0.00),66(CAGGTG,+,0.00),88(CAGGTG,+,0.00),110(CAGGTG,+,0.00),132(CAGGTG,+,0.00)
Merged-chr5-143288530-1	chr5	143288382	143288682	-18(CAGCTG,+,0.00),0(CAGCTG,+,0.00),9(CAGCTG,+,0.00),72(CAGCTG,+,0.00)	-39(CAGGTG,+,0.00),27(CAGGTG,+,0.00)
Merged-chr2-167109706-2	chr2	167109554	167109854	0(CAGCTG,+,0.00),15(CAGCTG,+,0.00)	-23(CAGGTG,+,0.00)
Merged-chr4-59945215-2	chr4	59945053	59945353		-132(CAGGTG,+,0.00),-66(CAGGTG,+,0.00),-36(CAGGTG,+,0.00),0(CAGGTG,+,0.00),30(CAGGTG,+,0.00)
Merged-chr7-134208100-2	chr7	134207931	134208231	-96(CAGCTG,+,0.00),-58(CAGCTG,+,0.00),0(CAGCTG,+,0.00),40(CAGCTG,+,0.00)
Merged-chr11-52479737-2	chr11	52479582	52479882	-60(CAGCTG,+,0.00)	0(CAGGTG,+,0.00)	-96(CACCTG,+,0.00),-48(CACCTG,+,0.00),12(CACCTG,+,0.00),24(CACCTG,+,0.00),60(CACCTG,+,0.00),108(CACCTG,+,0.00),132(CACCTG,+,0.00),144(CACCTG,+,0.00)
Merged-chr17-87235124-2	chr17	87234990	87235290		-87(CAGGTG,+,0.00),-43(CAGGTG,+,0.00),0(CAGGTG,+,0.00),22(CAGGTG,+,0.00),44(CAGGTG,+,0.00),66(CAGGTG,+,0.00),88(CAGGTG,+,0.00),105(CAGGTG,+,0.00)
Merged-chr5-33514771-2	chr5	33514614	33514914		-78(CAGGTG,+,0.00),-63(CAGGTG,+,0.00),-47(CAGGTG,+,0.00),-31(CAGGTG,+,0.00),-16(CAGGTG,+,0.00),0(CAGGTG,+,0.00),16(CAGGTG,+,0.00),31(CAGGTG,+,0.00),47(CAGGTG,+,0.00),63(CAGGTG,+,0.00),77(CAGGTG,+,0.00),93(CAGGTG,+,0.00)
Merged-chr4-150184026-1	chr4	150183876	150184176	-100(CAGCTG,+,0.00),-66(CAGCTG,+,0.00),-33(CAGCTG,+,0.00),0(CAGCTG,+,0.00),68(CAGCTG,+,0.00),102(CAGCTG,+,0.00),136(CAGCTG,+,0.00)	-116(CAGGTG,+,0.00),-82(CAGGTG,+,0.00),-49(CAGGTG,+,0.00),-16(CAGGTG,+,0.00),18(CAGGTG,+,0.00),52(CAGGTG,+,0.00),86(CAGGTG,+,0.00),120(CAGGTG,+,0.00)	34(CACCTG,+,0.00)
Merged-chr13-49383010-2	chr13	49382871	49383171	0(CAGCTG,+,0.00),41(CAGCTG,+,0.00),62(CAGCTG,+,0.00),69(CAGCTG,+,0.00)	19(CAGGTG,+,0.00)
Merged-chr6-125413121-2	chr6	125412975	125413275		0(CAGGTG,+,0.00),52(CAGGTG,+,0.00)
Merged-chr5-100751840-2	chr5	100751676	100751976	0(CAGCTG,+,0.00)	21(CAGGTG,+,0.00)
Merged-chr11-51659504-2	chr11	51659356	51659656	0(CAGCTG,+,0.00),10(CAGCTG,+,0.00)	-56(CAGGTG,+,0.00),110(CAGGTG,+,0.00)
Merged-chr5-139220284-2	chr5	139220143	139220443	-41(CAGCTG,+,0.00),-19(CAGCTG,+,0.00)	0(CAGGTG,+,0.00)
Merged-chr18-82591039-2	chr18	82590884	82591184		0(CAGGTG,+,0.00)	-14(CACCTG,+,0.00)
Merged-chr4-152512004-2	chr4	152511847	152512147	0(CAGCTG,+,0.00),24(CAGCTG,+,0.00),48(CAGCTG,+,0.00),72(CAGCTG,+,0.00),96(CAGCTG,+,0.00),120(CAGCTG,+,0.00),144(CAGCTG,+,0.00)	-62(CAGGTG,+,0.00)	-106(CACCTG,+,0.00)
Merged-chr9-108292458-2	chr9	108292320	108292620		0(CAGGTG,+,0.00),13(CAGGTG,+,0.00),26(CAGGTG,+,0.00),39(CAGGTG,+,0.00),52(CAGGTG,+,0.00),65(CAGGTG,+,0.00),78(CAGGTG,+,0.00),91(CAGGTG,+,0.00),104(CAGGTG,+,0.00),117(CAGGTG,+,0.00),130(CAGGTG,+,0.00),143(CAGGTG,+,0.00)
Merged-chr6-36787786-2	chr6	36787636	36787936	-11(CAGCTG,+,0.00),0(CAGCTG,+,0.00)		12(CACCTG,+,0.00)
Merged-chr17-29509115-2	chr17	29508957	29509257	-20(CAGCTG,+,0.00)	0(CAGGTG,+,0.00),45(CAGGTG,+,0.00)
Merged-chr5-123766602-2	chr5	123766459	123766759	0(CAGCTG,+,0.00),17(CAGCTG,+,0.00),34(CAGCTG,+,0.00),51(CAGCTG,+,0.00)
Merged-chr16-52083519-2	chr16	52083382	52083682		-150(CAGGTG,+,0.00),-128(CAGGTG,+,0.00),-84(CAGGTG,+,0.00),-62(CAGGTG,+,0.00),-40(CAGGTG,+,0.00),0(CAGGTG,+,0.00),132(CAGGTG,+,0.00)
Merged-chr4-155449212-2	chr4	155449075	155449375	0(CAGCTG,+,0.00),43(CAGCTG,+,0.00),86(CAGCTG,+,0.00),129(CAGCTG,+,0.00)
Merged-chr5-92016481-2	chr5	92016345	92016645		-128(CAGGTG,+,0.00),-96(CAGGTG,+,0.00),-64(CAGGTG,+,0.00),-32(CAGGTG,+,0.00),0(CAGGTG,+,0.00),32(CAGGTG,+,0.00),43(CAGGTG,+,0.00),64(CAGGTG,+,0.00),128(CAGGTG,+,0.00)
Merged-chr19-42000610-2	chr19	42000456	42000756	-99(CAGCTG,+,0.00),-71(CAGCTG,+,0.00),23(CAGCTG,+,0.00)	0(CAGGTG,+,0.00)
Merged-chr6-94651760-2	chr6	94651623	94651923		0(CAGGTG,+,0.00)	-53(CACCTG,+,0.00)
Merged-chr11-63160911-1	chr11	63160748	63161048		-121(CAGGTG,+,0.00),-112(CAGGTG,+,0.00),-81(CAGGTG,+,0.00),-72(CAGGTG,+,0.00),-40(CAGGTG,+,0.00),-31(CAGGTG,+,0.00),0(CAGGTG,+,0.00),9(CAGGTG,+,0.00),40(CAGGTG,+,0.00),49(CAGGTG,+,0.00),80(CAGGTG,+,0.00)
Merged-chr11-96509420-2	chr11	96509264	96509564		-124(CAGGTG,+,0.00),-93(CAGGTG,+,0.00),-62(CAGGTG,+,0.00),-31(CAGGTG,+,0.00),0(CAGGTG,+,0.00),30(CAGGTG,+,0.00),61(CAGGTG,+,0.00),92(CAGGTG,+,0.00)
Merged-chr15-37514773-2	chr15	37514625	37514925		-16(CAGGTG,+,0.00),-8(CAGGTG,+,0.00),0(CAGGTG,+,0.00),8(CAGGTG,+,0.00),16(CAGGTG,+,0.00),24(CAGGTG,+,0.00),32(CAGGTG,+,0.00),40(CAGGTG,+,0.00),48(CAGGTG,+,0.00),56(CAGGTG,+,0.00),64(CAGGTG,+,0.00),72(CAGGTG,+,0.00),80(CAGGTG,+,0.00)
Merged-chr8-19759706-2	chr8	19759544	19759844		-105(CAGGTG,+,0.00),0(CAGGTG,+,0.00),51(CAGGTG,+,0.00)
Merged-chr11-114175910-2	chr11	114175760	114176060		0(CAGGTG,+,0.00)
Merged-chr9-61085080-2	chr9	61084932	61085232	0(CAGCTG,+,0.00),33(CAGCTG,+,0.00)	9(CAGGTG,+,0.00)	-55(CACCTG,+,0.00)
Merged-chr9-22499958-2	chr9	22499811	22500111		-141(CAGGTG,+,0.00),-104(CAGGTG,+,0.00),-78(CAGGTG,+,0.00),-52(CAGGTG,+,0.00),-26(CAGGTG,+,0.00),0(CAGGTG,+,0.00),26(CAGGTG,+,0.00),52(CAGGTG,+,0.00),78(CAGGTG,+,0.00),104(CAGGTG,+,0.00),130(CAGGTG,+,0.00)
Merged-chr4-140273318-2	chr4	140273167	140273467		-150(CAGGTG,+,0.00),-136(CAGGTG,+,0.00),-127(CAGGTG,+,0.00),-109(CAGGTG,+,0.00),-91(CAGGTG,+,0.00),-68(CAGGTG,+,0.00),-59(CAGGTG,+,0.00),-45(CAGGTG,+,0.00),-36(CAGGTG,+,0.00),-18(CAGGTG,+,0.00),0(CAGGTG,+,0.00),9(CAGGTG,+,0.00),32(CAGGTG,+,0.00),41(CAGGTG,+,0.00),50(CAGGTG,+,0.00),73(CAGGTG,+,0.00),96(CAGGTG,+,0.00),105(CAGGTG,+,0.00),114(CAGGTG,+,0.00),123(CAGGTG,+,0.00)
Merged-chr13-41334091-2	chr13	41333959	41334259	-70(CAGCTG,+,0.00)	0(CAGGTG,+,0.00)
Merged-chr9-41721692-2	chr9	41721544	41721844	-11(CAGCTG,+,0.00),0(CAGCTG,+,0.00)	-34(CAGGTG,+,0.00)	-48(CACCTG,+,0.00)
Merged-chr14-64585524-1	chr14	64585378	64585678	0(CAGCTG,+,0.00)
Merged-chr5-144253089-2	chr5	144252934	144253234		-28(CAGGTG,+,0.00),-12(CAGGTG,+,0.00),0(CAGGTG,+,0.00)
Merged-chr6-86523872-2	chr6	86523737	86524037	-52(CAGCTG,+,0.00),112(CAGCTG,+,0.00)	0(CAGGTG,+,0.00),31(CAGGTG,+,0.00)
Merged-chr10-69208419-1	chr10	69208277	69208577	-144(CAGCTG,+,0.00),0(CAGCTG,+,0.00),43(CAGCTG,+,0.00)		-65(CACCTG,+,0.00)
Merged-chr11-118892842-1	chr11	118892680	118892980		-11(CAGGTG,+,0.00),0(CAGGTG,+,0.00),50(CAGGTG,+,0.00),61(CAGGTG,+,0.00),72(CAGGTG,+,0.00),83(CAGGTG,+,0.00),94(CAGGTG,+,0.00)
Merged-chr13-35812235-2	chr13	35812092	35812392	-28(CAGCTG,+,0.00),0(CAGCTG,+,0.00),23(CAGCTG,+,0.00)
Merged-chr7-19800204-2	chr7	19800065	19800365		0(CAGGTG,+,0.00),11(CAGGTG,+,0.00),34(CAGGTG,+,0.00),45(CAGGTG,+,0.00),68(CAGGTG,+,0.00),79(CAGGTG,+,0.00),136(CAGGTG,+,0.00)
Merged-chr5-37372993-2	chr5	37372861	37373161		0(CAGGTG,+,0.00),132(CAGGTG,+,0.00)
Merged-chr12-28507280-2	chr12	28507128	28507428	37(CAGCTG,+,0.00)	-16(CAGGTG,+,0.00),0(CAGGTG,+,0.00)	69(CACCTG,+,0.00)
Merged-chr7-81475569-2	chr7	81475418	81475718	-17(CAGCTG,+,0.00),0(CAGCTG,+,0.00),17(CAGCTG,+,0.00)		47(CACCTG,+,0.00)
Merged-chr2-30779923-2	chr2	30779773	30780073		-28(CAGGTG,+,0.00),-14(CAGGTG,+,0.00),0(CAGGTG,+,0.00),14(CAGGTG,+,0.00),42(CAGGTG,+,0.00)	-141(CACCTG,+,0.00)
Merged-chr1-171590979-2	chr1	171590831	171591131	-135(CAGCTG,+,0.00),-108(CAGCTG,+,0.00),-81(CAGCTG,+,0.00),-54(CAGCTG,+,0.00),-27(CAGCTG,+,0.00),0(CAGCTG,+,0.00),27(CAGCTG,+,0.00),54(CAGCTG,+,0.00),81(CAGCTG,+,0.00),108(CAGCTG,+,0.00),135(CAGCTG,+,0.00)
Merged-chr5-36281073-2	chr5	36280919	36281219		-104(CAGGTG,+,0.00),-71(CAGGTG,+,0.00),-53(CAGGTG,+,0.00),-35(CAGGTG,+,0.00),-17(CAGGTG,+,0.00),0(CAGGTG,+,0.00),35(CAGGTG,+,0.00),53(CAGGTG,+,0.00),70(CAGGTG,+,0.00),88(CAGGTG,+,0.00),105(CAGGTG,+,0.00),122(CAGGTG,+,0.00),140(CAGGTG,+,0.00)
Merged-chr12-102224260-2	chr12	102224116	102224416		-117(CAGGTG,+,0.00),-99(CAGGTG,+,0.00),-84(CAGGTG,+,0.00),-66(CAGGTG,+,0.00),-51(CAGGTG,+,0.00),-33(CAGGTG,+,0.00),-18(CAGGTG,+,0.00),0(CAGGTG,+,0.00),15(CAGGTG,+,0.00),33(CAGGTG,+,0.00),48(CAGGTG,+,0.00),66(CAGGTG,+,0.00),81(CAGGTG,+,0.00)
Merged-chr1-152203392-1	chr1	152203238	152203538	-57(CAGCTG,+,0.00),0(CAGCTG,+,0.00),12(CAGCTG,+,0.00)		-99(CACCTG,+,0.00)
Merged-chr2-34073428-1	chr2	34073280	34073580	-64(CAGCTG,+,0.00),-36(CAGCTG,+,0.00),-27(CAGCTG,+,0.00),-18(CAGCTG,+,0.00),0(CAGCTG,+,0.00),9(CAGCTG,+,0.00),18(CAGCTG,+,0.00)
Merged-chr18-82934293-2	chr18	82934135	82934435	-136(CAGCTG,+,0.00),-102(CAGCTG,+,0.00),-68(CAGCTG,+,0.00),-34(CAGCTG,+,0.00),0(CAGCTG,+,0.00),34(CAGCTG,+,0.00),68(CAGCTG,+,0.00)
Merged-chr17-28356759-2	chr17	28356616	28356916	0(CAGCTG,+,0.00)	13(CAGGTG,+,0.00)
Merged-chr7-142240544-2	chr7	142240383	142240683	-54(CAGCTG,+,0.00),0(CAGCTG,+,0.00),30(CAGCTG,+,0.00),60(CAGCTG,+,0.00),90(CAGCTG,+,0.00),120(CAGCTG,+,0.00)
Merged-chr2-169617710-2	chr2	169617553	169617853		-144(CAGGTG,+,0.00),-108(CAGGTG,+,0.00),-90(CAGGTG,+,0.00),-54(CAGGTG,+,0.00),-36(CAGGTG,+,0.00),-18(CAGGTG,+,0.00),0(CAGGTG,+,0.00)
Merged-chr19-57707892-2	chr19	57707752	57708052	104(CAGCTG,+,0.00)	-132(CAGGTG,+,0.00),-88(CAGGTG,+,0.00),-44(CAGGTG,+,0.00),0(CAGGTG,+,0.00),44(CAGGTG,+,0.00),88(CAGGTG,+,0.00)	-116(CACCTG,+,0.00),-72(CACCTG,+,0.00),-28(CACCTG,+,0.00),16(CACCTG,+,0.00),60(CACCTG,+,0.00)
Merged-chr8-123357506-2	chr8	123357338	123357638	72(CAGCTG,+,0.00)	0(CAGGTG,+,0.00)
Merged-chr11-9784727-2	chr11	9784571	9784871	0(CAGCTG,+,0.00),13(CAGCTG,+,0.00)
Merged-chr16-20522639-2	chr16	20522484	20522784	-130(CAGCTG,+,0.00),-118(CAGCTG,+,0.00),-97(CAGCTG,+,0.00),-65(CAGCTG,+,0.00),-32(CAGCTG,+,0.00),0(CAGCTG,+,0.00),33(CAGCTG,+,0.00),45(CAGCTG,+,0.00),66(CAGCTG,+,0.00),78(CAGCTG,+,0.00),99(CAGCTG,+,0.00),131(CAGCTG,+,0.00)
Merged-chr15-101229373-2	chr15	101229218	101229518	-32(CAGCTG,+,0.00),-19(CAGCTG,+,0.00),0(CAGCTG,+,0.00)	-116(CAGGTG,+,0.00)
Merged-chr4-133896641-2	chr4	133896486	133896786		-11(CAGGTG,+,0.00),0(CAGGTG,+,0.00),11(CAGGTG,+,0.00),22(CAGGTG,+,0.00),44(CAGGTG,+,0.00)
Merged-chr12-99272874-2	chr12	99272719	99273019	-121(CAGCTG,+,0.00),-91(CAGCTG,+,0.00),-61(CAGCTG,+,0.00),-30(CAGCTG,+,0.00),0(CAGCTG,+,0.00),30(CAGCTG,+,0.00),61(CAGCTG,+,0.00),91(CAGCTG,+,0.00)
Merged-chr8-21848781-2	chr8	21848621	21848921		0(CAGGTG,+,0.00)
Merged-chr7-45437725-1	chr7	45437574	45437874	-49(CAGCTG,+,0.00),0(CAGCTG,+,0.00)
Merged-chr1-16436654-2	chr1	16436502	16436802		0(CAGGTG,+,0.00)
Merged-chr17-35440418-2	chr17	35440267	35440567	0(CAGCTG,+,0.00)
Merged-chr9-109367484-2	chr9	109367327	109367627		-41(CAGGTG,+,0.00),0(CAGGTG,+,0.00),76(CAGGTG,+,0.00)
Merged-chr11-65053246-2	chr11	65053106	65053406		0(CAGGTG,+,0.00),11(CAGGTG,+,0.00),22(CAGGTG,+,0.00),33(CAGGTG,+,0.00),44(CAGGTG,+,0.00),55(CAGGTG,+,0.00),66(CAGGTG,+,0.00),77(CAGGTG,+,0.00)	-42(CACCTG,+,0.00)
Merged-chr11-99699617-2	chr11	99699469	99699769	-105(CAGCTG,+,0.00)	-118(CAGGTG,+,0.00),-90(CAGGTG,+,0.00),-15(CAGGTG,+,0.00),0(CAGGTG,+,0.00)
Merged-chr7-14586770-2	chr7	14586613	14586913	-101(CAGCTG,+,0.00),-7(CAGCTG,+,0.00),14(CAGCTG,+,0.00)	-56(CAGGTG,+,0.00),0(CAGGTG,+,0.00)
Merged-chr10-127084220-2	chr10	127084078	127084378		0(CAGGTG,+,0.00),63(CAGGTG,+,0.00),108(CAGGTG,+,0.00)
Merged-chr8-125271561-2	chr8	125271413	125271713	0(CAGCTG,+,0.00)	13(CAGGTG,+,0.00)	-43(CACCTG,+,0.00)
Merged-chr10-83168935-1	chr10	83168797	83169097	0(CAGCTG,+,0.00),10(CAGCTG,+,0.00),20(CAGCTG,+,0.00)		-136(CACCTG,+,0.00)
Merged-chr8-12127906-1	chr8	12127774	12128074	-142(CAGCTG,+,0.00),44(CAGCTG,+,0.00)	0(CAGGTG,+,0.00)	81(CACCTG,+,0.00)
Merged-chr16-18774080-1	chr16	18773930	18774230	0(CAGCTG,+,0.00)	112(CAGGTG,+,0.00)
Merged-chr16-22120653-2	chr16	22120517	22120817	0(CAGCTG,+,0.00)
Merged-chr16-90553383-2	chr16	90553242	90553542	-56(CAGCTG,+,0.00),0(CAGCTG,+,0.00)
Merged-chr1-171333387-2	chr1	171333238	171333538		0(CAGGTG,+,0.00),11(CAGGTG,+,0.00)	-17(CACCTG,+,0.00)
Merged-chr5-101085406-2	chr5	101085258	101085558	-66(CAGCTG,+,0.00),-33(CAGCTG,+,0.00),0(CAGCTG,+,0.00),33(CAGCTG,+,0.00)
Merged-chr8-123997051-2	chr8	123996901	123997201	0(CAGCTG,+,0.00)		22(CACCTG,+,0.00)
Merged-chr2-121101629-2	chr2	121101473	121101773		-56(CAGGTG,+,0.00),-48(CAGGTG,+,0.00),-32(CAGGTG,+,0.00),-24(CAGGTG,+,0.00),-16(CAGGTG,+,0.00),0(CAGGTG,+,0.00),24(CAGGTG,+,0.00),32(CAGGTG,+,0.00),40(CAGGTG,+,0.00),56(CAGGTG,+,0.00),64(CAGGTG,+,0.00),72(CAGGTG,+,0.00),88(CAGGTG,+,0.00),96(CAGGTG,+,0.00),112(CAGGTG,+,0.00),120(CAGGTG,+,0.00),128(CAGGTG,+,0.00),144(CAGGTG,+,0.00)
Merged-chr6-91156209-2	chr6	91156072	91156372	-35(CAGCTG,+,0.00),0(CAGCTG,+,0.00),27(CAGCTG,+,0.00),83(CAGCTG,+,0.00)
Merged-chr14-102072400-2	chr14	102072249	102072549	-103(CAGCTG,+,0.00),-65(CAGCTG,+,0.00),-42(CAGCTG,+,0.00),-19(CAGCTG,+,0.00),0(CAGCTG,+,0.00),23(CAGCTG,+,0.00)
Merged-chr9-72205982-2	chr9	72205816	72206116	-43(CAGCTG,+,0.00)	0(CAGGTG,+,0.00)	-56(CACCTG,+,0.00)
Merged-chr5-131764241-2	chr5	131764088	131764388	0(CAGCTG,+,0.00)
Merged-chr6-54409374-1	chr6	54409240	54409540	115(CAGCTG,+,0.00)	0(CAGGTG,+,0.00)
Merged-chr12-86525450-1	chr12	86525302	86525602		0(CAGGTG,+,0.00),28(CAGGTG,+,0.00),56(CAGGTG,+,0.00),84(CAGGTG,+,0.00),112(CAGGTG,+,0.00),140(CAGGTG,+,0.00)
Merged-chr8-70928296-1	chr8	70928160	70928460	-34(CAGCTG,+,0.00),0(CAGCTG,+,0.00),15(CAGCTG,+,0.00)
Merged-chr4-61824959-2	chr4	61824797	61825097	0(CAGCTG,+,0.00)
Merged-chr11-52014408-2	chr11	52014275	52014575		0(CAGGTG,+,0.00)
Merged-chr16-89973984-1	chr16	89973833	89974133	-51(CAGCTG,+,0.00),0(CAGCTG,+,0.00),13(CAGCTG,+,0.00)	-36(CAGGTG,+,0.00),86(CAGGTG,+,0.00)	-107(CACCTG,+,0.00)
Merged-chr5-140882496-1	chr5	140882353	140882653	0(CAGCTG,+,0.00)	105(CAGGTG,+,0.00)
Merged-chr9-31084856-1	chr9	31084713	31085013	37(CAGCTG,+,0.00)	-15(CAGGTG,+,0.00),0(CAGGTG,+,0.00)
Merged-chr5-143654946-1	chr5	143654788	143655088	0(CAGCTG,+,0.00)
Merged-chr5-21617751-2	chr5	21617614	21617914		-143(CAGGTG,+,0.00),-133(CAGGTG,+,0.00),-95(CAGGTG,+,0.00),-86(CAGGTG,+,0.00),-67(CAGGTG,+,0.00),-48(CAGGTG,+,0.00),-38(CAGGTG,+,0.00),0(CAGGTG,+,0.00)
Merged-chr8-92171730-1	chr8	92171567	92171867	0(CAGCTG,+,0.00)	-57(CAGGTG,+,0.00)
Merged-chr1-90156782-1	chr1	90156634	90156934	0(CAGCTG,+,0.00),15(CAGCTG,+,0.00)		-26(CACCTG,+,0.00)
Merged-chr17-50116628-2	chr17	50116455	50116755		-144(CAGGTG,+,0.00),-112(CAGGTG,+,0.00),-96(CAGGTG,+,0.00),-80(CAGGTG,+,0.00),-64(CAGGTG,+,0.00),-32(CAGGTG,+,0.00),0(CAGGTG,+,0.00),48(CAGGTG,+,0.00),80(CAGGTG,+,0.00),128(CAGGTG,+,0.00),144(CAGGTG,+,0.00)
Merged-chr15-12224441-2	chr15	12224285	12224585	-58(CAGCTG,+,0.00),-29(CAGCTG,+,0.00),0(CAGCTG,+,0.00),29(CAGCTG,+,0.00),58(CAGCTG,+,0.00),87(CAGCTG,+,0.00)
Merged-chr7-126539445-2	chr7	126539297	126539597	-142(CAGCTG,+,0.00),-114(CAGCTG,+,0.00),-85(CAGCTG,+,0.00),-57(CAGCTG,+,0.00),-28(CAGCTG,+,0.00),0(CAGCTG,+,0.00),29(CAGCTG,+,0.00),57(CAGCTG,+,0.00),86(CAGCTG,+,0.00),115(CAGCTG,+,0.00),143(CAGCTG,+,0.00)
Merged-chr6-84897909-2	chr6	84897775	84898075		0(CAGGTG,+,0.00)
Merged-chr8-109569285-1	chr8	109569132	109569432		0(CAGGTG,+,0.00),29(CAGGTG,+,0.00),145(CAGGTG,+,0.00)
Merged-chr6-39464401-2	chr6	39464253	39464553	0(CAGCTG,+,0.00)
Merged-chr4-129828266-2	chr4	129828136	129828436	0(CAGCTG,+,0.00),18(CAGCTG,+,0.00)	74(CAGGTG,+,0.00)
Merged-chr16-97815793-2	chr16	97815640	97815940		-71(CAGGTG,+,0.00),-42(CAGGTG,+,0.00),0(CAGGTG,+,0.00)	77(CACCTG,+,0.00)
Merged-chr5-115435854-2	chr5	115435709	115436009	-19(CAGCTG,+,0.00)	0(CAGGTG,+,0.00)	-116(CACCTG,+,0.00)
Merged-chr9-108050680-1	chr9	108050541	108050841	0(CAGCTG,+,0.00)	-84(CAGGTG,+,0.00)
Merged-chr7-128058746-2	chr7	128058602	128058902	0(CAGCTG,+,0.00),12(CAGCTG,+,0.00)		80(CACCTG,+,0.00)
Merged-chr3-131591790-2	chr3	131591644	131591944		-44(CAGGTG,+,0.00),-22(CAGGTG,+,0.00),0(CAGGTG,+,0.00),22(CAGGTG,+,0.00),44(CAGGTG,+,0.00),66(CAGGTG,+,0.00)
Merged-chr8-122698563-2	chr8	122698413	122698713	0(CAGCTG,+,0.00),32(CAGCTG,+,0.00)		-36(CACCTG,+,0.00),23(CACCTG,+,0.00)
Merged-chr5-114856242-1	chr5	114856089	114856389		-129(CAGGTG,+,0.00),-118(CAGGTG,+,0.00),-96(CAGGTG,+,0.00),-85(CAGGTG,+,0.00),-63(CAGGTG,+,0.00),-41(CAGGTG,+,0.00),-19(CAGGTG,+,0.00),0(CAGGTG,+,0.00),11(CAGGTG,+,0.00),22(CAGGTG,+,0.00),33(CAGGTG,+,0.00),63(CAGGTG,+,0.00),91(CAGGTG,+,0.00),102(CAGGTG,+,0.00),113(CAGGTG,+,0.00),124(CAGGTG,+,0.00)	-142(CACCTG,+,0.00)
Merged-chr15-100664914-2	chr15	100664770	100665070	-52(CAGCTG,+,0.00)	0(CAGGTG,+,0.00)	-106(CACCTG,+,0.00)
Merged-chr7-67466529-2	chr7	67466384	67466684	0(CAGCTG,+,0.00)	-73(CAGGTG,+,0.00),15(CAGGTG,+,0.00)
Merged-chr15-75658735-2	chr15	75658601	75658901	0(CAGCTG,+,0.00),14(CAGCTG,+,0.00)
Merged-chr7-29382101-2	chr7	29381962	29382262	0(CAGCTG,+,0.00)		-86(CACCTG,+,0.00),66(CACCTG,+,0.00)
Merged-chr2-157837691-2	chr2	157837551	157837851	0(CAGCTG,+,0.00)
Merged-chr8-93929365-1	chr8	93929221	93929521	63(CAGCTG,+,0.00),80(CAGCTG,+,0.00)	-15(CAGGTG,+,0.00),0(CAGGTG,+,0.00),46(CAGGTG,+,0.00)
Merged-chr17-47291630-1	chr17	47291475	47291775	-125(CAGCTG,+,0.00),-94(CAGCTG,+,0.00),-63(CAGCTG,+,0.00),0(CAGCTG,+,0.00),31(CAGCTG,+,0.00)	-136(CAGGTG,+,0.00),20(CAGGTG,+,0.00)	-20(CACCTG,+,0.00)
Merged-chr1-58486341-2	chr1	58486171	58486471		0(CAGGTG,+,0.00),40(CAGGTG,+,0.00),64(CAGGTG,+,0.00)

## Sheet: NEUROD1_open
PeakID	Chr	Start	End	CAKMTG Distance From Peak(sequence,strand,conservation)	CAGCTG Distance From Peak(sequence,strand,conservation)	CAGATG Distance From Peak(sequence,strand,conservation)	CATCTG Distance From Peak(sequence,strand,conservation)	CATATG Distance From Peak(sequence,strand,conservation)
chr11-3	chr11	114795298	114795598	-93(CATCTG,+,0.00),-49(CAGCTG,+,0.00),0(CAGCTG,+,0.00),61(CAGCTG,+,0.00)	-49(CAGCTG,+,0.00),0(CAGCTG,+,0.00),61(CAGCTG,+,0.00)		-93(CATCTG,+,0.00)
chr2-6	chr2	152804309	152804609	-148(CATCTG,+,0.00),-30(CAGCTG,+,0.00),0(CAGCTG,+,0.00)	-30(CAGCTG,+,0.00),0(CAGCTG,+,0.00)		-148(CATCTG,+,0.00)
chr17-4	chr17	12106330	12106630	-147(CAGCTG,+,0.00),-24(CATATG,+,0.00),0(CAGCTG,+,0.00),52(CAGATG,+,0.00)	-147(CAGCTG,+,0.00),0(CAGCTG,+,0.00)	52(CAGATG,+,0.00)		-24(CATATG,+,0.00)
chr13-1	chr13	51920561	51920861	-26(CAGCTG,+,0.00),0(CAGCTG,+,0.00),135(CAGCTG,+,0.00)	-26(CAGCTG,+,0.00),0(CAGCTG,+,0.00),135(CAGCTG,+,0.00)
chr1-3	chr1	12814440	12814740	0(CAGCTG,+,0.00)	0(CAGCTG,+,0.00)
chr17-8	chr17	15248000	15248300	-31(CAGATG,+,0.00),0(CATCTG,+,0.00)		-31(CAGATG,+,0.00)	0(CATCTG,+,0.00)
chr17-9	chr17	80801465	80801765	-139(CAGATG,+,0.00),-125(CAGATG,+,0.00),-13(CAGCTG,+,0.00),0(CAGATG,+,0.00),33(CATCTG,+,0.00)	-13(CAGCTG,+,0.00)	-139(CAGATG,+,0.00),-125(CAGATG,+,0.00),0(CAGATG,+,0.00)	33(CATCTG,+,0.00)
chr19-1	chr19	7265888	7266188	-61(CAGCTG,+,0.00),0(CATCTG,+,0.00)	-61(CAGCTG,+,0.00)		0(CATCTG,+,0.00)
chr4-4	chr4	9031730	9032030	-72(CATATG,+,0.00),0(CAGCTG,+,0.00),42(CATCTG,+,0.00),103(CATCTG,+,0.00)	0(CAGCTG,+,0.00)		42(CATCTG,+,0.00),103(CATCTG,+,0.00)	-72(CATATG,+,0.00)
chr4-5	chr4	128715833	128716133	0(CAGCTG,+,0.00),22(CAGCTG,+,0.00)	0(CAGCTG,+,0.00),22(CAGCTG,+,0.00)
chr16-3	chr16	12960890	12961190	0(CAGCTG,+,0.00)	0(CAGCTG,+,0.00)
chr4-9	chr4	117132007	117132307	-67(CAGCTG,+,0.00),0(CAGCTG,+,0.00),29(CAGCTG,+,0.00),37(CAGCTG,+,0.00),131(CATCTG,+,0.00)	-67(CAGCTG,+,0.00),0(CAGCTG,+,0.00),29(CAGCTG,+,0.00),37(CAGCTG,+,0.00)		131(CATCTG,+,0.00)
chr7-3	chr7	80746506	80746806	0(CAGCTG,+,0.00)	0(CAGCTG,+,0.00)
chr10-2	chr10	52742704	52743004	-78(CAGATG,+,0.00),0(CAGCTG,+,0.00)	0(CAGCTG,+,0.00)	-78(CAGATG,+,0.00)
chr8-7	chr8	89003385	89003685	0(CAGCTG,+,0.00),18(CAGCTG,+,0.00)	0(CAGCTG,+,0.00),18(CAGCTG,+,0.00)
chr10-1	chr10	33195960	33196260	-115(CATCTG,+,0.00),-79(CATCTG,+,0.00),0(CAGCTG,+,0.00),69(CAGCTG,+,0.00)	0(CAGCTG,+,0.00),69(CAGCTG,+,0.00)		-115(CATCTG,+,0.00),-79(CATCTG,+,0.00)
chr1-6	chr1	54484961	54485261	0(CAGCTG,+,0.00),37(CAGCTG,+,0.00)	0(CAGCTG,+,0.00),37(CAGCTG,+,0.00)
chr13-4	chr13	99609353	99609653	0(CAGCTG,+,0.00)	0(CAGCTG,+,0.00)
chr1-7	chr1	84217821	84218121	0(CAGATG,+,0.00)		0(CAGATG,+,0.00)
chr5-1	chr5	14039205	14039505	0(CAGCTG,+,0.00),80(CAGCTG,+,0.00)	0(CAGCTG,+,0.00),80(CAGCTG,+,0.00)
chr1-8	chr1	89870534	89870834	0(CAGCTG,+,0.00),20(CAGCTG,+,0.00)	0(CAGCTG,+,0.00),20(CAGCTG,+,0.00)
chr10-4	chr10	37397268	37397568	0(CAGATG,+,0.00),130(CATCTG,+,0.00)		0(CAGATG,+,0.00)	130(CATCTG,+,0.00)
chr9-20	chr9	121314163	121314463	-37(CAGCTG,+,0.00),0(CAGATG,+,0.00)	-37(CAGCTG,+,0.00)	0(CAGATG,+,0.00)
chr8-10	chr8	3395214	3395514	-62(CAGCTG,+,0.00),0(CAGATG,+,0.00)	-62(CAGCTG,+,0.00)	0(CAGATG,+,0.00)
chr8-11	chr8	69121472	69121772	-111(CAGATG,+,0.00),0(CAGATG,+,0.00),20(CAGCTG,+,0.00),145(CAGCTG,+,0.00)	20(CAGCTG,+,0.00),145(CAGCTG,+,0.00)	-111(CAGATG,+,0.00),0(CAGATG,+,0.00)
chr9-23	chr9	65109451	65109751	-119(CATCTG,+,0.00),0(CAGCTG,+,0.00)	0(CAGCTG,+,0.00)		-119(CATCTG,+,0.00)
chr16-6	chr16	16560089	16560389	0(CAGATG,+,0.00)		0(CAGATG,+,0.00)
chr2-18	chr2	112676770	112677070	-103(CAGCTG,+,0.00),-12(CATCTG,+,0.00),0(CAGCTG,+,0.00)	-103(CAGCTG,+,0.00),0(CAGCTG,+,0.00)		-12(CATCTG,+,0.00)
chr1-10	chr1	139039578	139039878	0(CATATG,+,0.00),28(CATATG,+,0.00)				0(CATATG,+,0.00),28(CATATG,+,0.00)
chr9-21	chr9	115450967	115451267	0(CATCTG,+,0.00),138(CAGCTG,+,0.00)	138(CAGCTG,+,0.00)		0(CATCTG,+,0.00)
chr8-13	chr8	114116136	114116436	0(CAGCTG,+,0.00),47(CAGCTG,+,0.00)	0(CAGCTG,+,0.00),47(CAGCTG,+,0.00)
chr2-19	chr2	78189609	78189909	-139(CAGCTG,+,0.00),-108(CAGCTG,+,0.00),-47(CAGCTG,+,0.00),0(CAGCTG,+,0.00),13(CAGCTG,+,0.00)	-139(CAGCTG,+,0.00),-108(CAGCTG,+,0.00),-47(CAGCTG,+,0.00),0(CAGCTG,+,0.00),13(CAGCTG,+,0.00)
chr2-20	chr2	84837170	84837470	-24(CAGCTG,+,0.00),0(CATCTG,+,0.00),21(CATATG,+,0.00),84(CAGATG,+,0.00)	-24(CAGCTG,+,0.00)	84(CAGATG,+,0.00)	0(CATCTG,+,0.00)	21(CATATG,+,0.00)
chr1-11	chr1	153641568	153641868	-79(CAGCTG,+,0.00),0(CAGCTG,+,0.00),51(CAGATG,+,0.00)	-79(CAGCTG,+,0.00),0(CAGCTG,+,0.00)	51(CAGATG,+,0.00)
chr6-9	chr6	108796802	108797102	0(CAGATG,+,0.00),25(CAGCTG,+,0.00),122(CAGCTG,+,0.00)	25(CAGCTG,+,0.00),122(CAGCTG,+,0.00)	0(CAGATG,+,0.00)
chr18-7	chr18	77117404	77117704	-62(CAGCTG,+,0.00),0(CAGATG,+,0.00)	-62(CAGCTG,+,0.00)	0(CAGATG,+,0.00)
chr10-8	chr10	45800025	45800325	-34(CAGATG,+,0.00),0(CAGCTG,+,0.00),144(CAGATG,+,0.00)	0(CAGCTG,+,0.00)	-34(CAGATG,+,0.00),144(CAGATG,+,0.00)
chr16-9	chr16	55321894	55322194	-26(CAGCTG,+,0.00),0(CAGATG,+,0.00),35(CAGCTG,+,0.00)	-26(CAGCTG,+,0.00),35(CAGCTG,+,0.00)	0(CAGATG,+,0.00)
chr5-4	chr5	39076620	39076920	0(CAGCTG,+,0.00),10(CAGATG,+,0.00)	0(CAGCTG,+,0.00)	10(CAGATG,+,0.00)
chr3-7	chr3	22297914	22298214	-108(CAGCTG,+,0.00),-21(CAGATG,+,0.00),0(CATCTG,+,0.00),117(CAGATG,+,0.00)	-108(CAGCTG,+,0.00)	-21(CAGATG,+,0.00),117(CAGATG,+,0.00)	0(CATCTG,+,0.00)
chr12-7	chr12	100337744	100338044	-27(CAGCTG,+,0.00),0(CAGATG,+,0.00)	-27(CAGCTG,+,0.00)	0(CAGATG,+,0.00)
chr7-9	chr7	130252211	130252511	-63(CAGATG,+,0.00),0(CAGCTG,+,0.00),18(CAGATG,+,0.00)	0(CAGCTG,+,0.00)	-63(CAGATG,+,0.00),18(CAGATG,+,0.00)
chr17-15	chr17	47887473	47887773	0(CAGATG,+,0.00)		0(CAGATG,+,0.00)
chr2-23	chr2	149982497	149982797	-31(CAGCTG,+,0.00),0(CAGCTG,+,0.00)	-31(CAGCTG,+,0.00),0(CAGCTG,+,0.00)
chr4-24	chr4	155189779	155190079	-139(CAGATG,+,0.00),0(CATCTG,+,0.00)		-139(CAGATG,+,0.00)	0(CATCTG,+,0.00)
chr2-21	chr2	27377988	27378288	0(CAGATG,+,0.00),73(CATCTG,+,0.00)		0(CAGATG,+,0.00)	73(CATCTG,+,0.00)
chr11-60	chr11	20231178	20231478	-41(CAGCTG,+,0.00),0(CATCTG,+,0.00)	-41(CAGCTG,+,0.00)		0(CATCTG,+,0.00)
chr4-21	chr4	13300216	13300516	-48(CAGCTG,+,0.00),0(CAGATG,+,0.00),52(CATCTG,+,0.00),87(CAGATG,+,0.00),95(CAGCTG,+,0.00)	-48(CAGCTG,+,0.00),95(CAGCTG,+,0.00)	0(CAGATG,+,0.00),87(CAGATG,+,0.00)	52(CATCTG,+,0.00)
chr14-8	chr14	68934867	68935167	-87(CATCTG,+,0.00),-19(CAGCTG,+,0.00),0(CATCTG,+,0.00),11(CAGCTG,+,0.00)	-19(CAGCTG,+,0.00),11(CAGCTG,+,0.00)		-87(CATCTG,+,0.00),0(CATCTG,+,0.00)
chr8-19	chr8	106619513	106619813	0(CAGCTG,+,0.00)	0(CAGCTG,+,0.00)
chr3-10	chr3	17589986	17590286	-35(CAGCTG,+,0.00),0(CAGCTG,+,0.00)	-35(CAGCTG,+,0.00),0(CAGCTG,+,0.00)
chr2-25	chr2	61246992	61247292	0(CAGCTG,+,0.00),66(CAGCTG,+,0.00)	0(CAGCTG,+,0.00),66(CAGCTG,+,0.00)
chr2-28	chr2	75959898	75960198	-32(CAGCTG,+,0.00),0(CATATG,+,0.00)	-32(CAGCTG,+,0.00)			0(CATATG,+,0.00)
chr5-8	chr5	72902440	72902740	0(CATCTG,+,0.00)			0(CATCTG,+,0.00)
chr15-10	chr15	25762314	25762614	0(CAGCTG,+,0.00),129(CATCTG,+,0.00)	0(CAGCTG,+,0.00)		129(CATCTG,+,0.00)
chr8-23	chr8	78147441	78147741	0(CAGCTG,+,0.00),76(CAGCTG,+,0.00),121(CATATG,+,0.00)	0(CAGCTG,+,0.00),76(CAGCTG,+,0.00)			121(CATATG,+,0.00)
chr2-32	chr2	125134248	125134548	-101(CAGCTG,+,0.00),0(CAGCTG,+,0.00),49(CAGCTG,+,0.00)	-101(CAGCTG,+,0.00),0(CAGCTG,+,0.00),49(CAGCTG,+,0.00)
chr7-14	chr7	145173078	145173378	-128(CAGCTG,+,0.00),0(CATCTG,+,0.00),100(CAGATG,+,0.00),128(CATCTG,+,0.00)	-128(CAGCTG,+,0.00)	100(CAGATG,+,0.00)	0(CATCTG,+,0.00),128(CATCTG,+,0.00)
chr1-21	chr1	91413222	91413522	0(CAGCTG,+,0.00)	0(CAGCTG,+,0.00)
chr7-15	chr7	28302188	28302488	-134(CATCTG,+,0.00),-37(CAGCTG,+,0.00),0(CAGATG,+,0.00),20(CAGCTG,+,0.00)	-37(CAGCTG,+,0.00),20(CAGCTG,+,0.00)	0(CAGATG,+,0.00)	-134(CATCTG,+,0.00)
chr6-13	chr6	86950884	86951184	-137(CAGCTG,+,0.00),0(CAGATG,+,0.00)	-137(CAGCTG,+,0.00)	0(CAGATG,+,0.00)
chr2-31	chr2	117019182	117019482	-54(CAGCTG,+,0.00),0(CATCTG,+,0.00)	-54(CAGCTG,+,0.00)		0(CATCTG,+,0.00)
chr2-36	chr2	121270548	121270848	0(CATCTG,+,0.00)			0(CATCTG,+,0.00)
chr15-13	chr15	101098006	101098306	0(CAGATG,+,0.00)		0(CAGATG,+,0.00)
chr4-28	chr4	66330600	66330900	-103(CATCTG,+,0.00),0(CATCTG,+,0.00)			-103(CATCTG,+,0.00),0(CATCTG,+,0.00)
chr11-72	chr11	88629793	88630093	0(CAGCTG,+,0.00)	0(CAGCTG,+,0.00)
chr2-34	chr2	8498593	8498893	0(CATCTG,+,0.00)			0(CATCTG,+,0.00)
chr6-18	chr6	142867588	142867888	0(CATCTG,+,0.00)			0(CATCTG,+,0.00)
chr5-13	chr5	132923387	132923687	-87(CATCTG,+,0.00),-57(CAGATG,+,0.00),0(CAGATG,+,0.00),21(CAGCTG,+,0.00)	21(CAGCTG,+,0.00)	-57(CAGATG,+,0.00),0(CAGATG,+,0.00)	-87(CATCTG,+,0.00)
chr19-3	chr19	21784467	21784767	0(CAGATG,+,0.00),52(CAGCTG,+,0.00)	52(CAGCTG,+,0.00)	0(CAGATG,+,0.00)
chr5-16	chr5	140581576	140581876	-67(CAGATG,+,0.00),0(CAGATG,+,0.00)		-67(CAGATG,+,0.00),0(CAGATG,+,0.00)
chr7-17	chr7	79428260	79428560	-120(CAGCTG,+,0.00),0(CAGATG,+,0.00)	-120(CAGCTG,+,0.00)	0(CAGATG,+,0.00)
chr11-73	chr11	19986539	19986839	-130(CATATG,+,0.00),0(CAGATG,+,0.00),22(CAGCTG,+,0.00)	22(CAGCTG,+,0.00)	0(CAGATG,+,0.00)		-130(CATATG,+,0.00)
chr12-12	chr12	66591674	66591974	-118(CAGCTG,+,0.00),0(CATCTG,+,0.00)	-118(CAGCTG,+,0.00)		0(CATCTG,+,0.00)
chrX-6	chrX	162009801	162010101	-87(CAGATG,+,0.00),0(CAGCTG,+,0.00),74(CATCTG,+,0.00)	0(CAGCTG,+,0.00)	-87(CAGATG,+,0.00)	74(CATCTG,+,0.00)
chr16-18	chr16	21701898	21702198	0(CAGCTG,+,0.00),104(CAGATG,+,0.00)	0(CAGCTG,+,0.00)	104(CAGATG,+,0.00)
chr19-5	chr19	48807360	48807660	0(CAGCTG,+,0.00)	0(CAGCTG,+,0.00)
chr5-15	chr5	81519494	81519794	-86(CAGCTG,+,0.00),-66(CAGCTG,+,0.00),0(CAGCTG,+,0.00)	-86(CAGCTG,+,0.00),-66(CAGCTG,+,0.00),0(CAGCTG,+,0.00)
chr1-25	chr1	134063206	134063506	0(CAGATG,+,0.00)		0(CAGATG,+,0.00)
chr1-30	chr1	22378177	22378477	-33(CAGCTG,+,0.00),0(CAGATG,+,0.00),10(CAGCTG,+,0.00),20(CAGCTG,+,0.00)	-33(CAGCTG,+,0.00),10(CAGCTG,+,0.00),20(CAGCTG,+,0.00)	0(CAGATG,+,0.00)
chr6-17	chr6	116670985	116671285	-106(CAGCTG,+,0.00),0(CAGCTG,+,0.00)	-106(CAGCTG,+,0.00),0(CAGCTG,+,0.00)
chr10-13	chr10	96309074	96309374	0(CAGCTG,+,0.00),86(CAGCTG,+,0.00)	0(CAGCTG,+,0.00),86(CAGCTG,+,0.00)
chr2-39	chr2	74426814	74427114	0(CAGATG,+,0.00),14(CAGCTG,+,0.00),26(CAGATG,+,0.00)	14(CAGCTG,+,0.00)	0(CAGATG,+,0.00),26(CAGATG,+,0.00)
chr8-34	chr8	107876481	107876781	0(CAGCTG,+,0.00),7(CAGCTG,+,0.00)	0(CAGCTG,+,0.00),7(CAGCTG,+,0.00)
chr3-21	chr3	107681253	107681553	-66(CAGATG,+,0.00),0(CAGCTG,+,0.00),72(CAGCTG,+,0.00)	0(CAGCTG,+,0.00),72(CAGCTG,+,0.00)	-66(CAGATG,+,0.00)
chr7-21	chr7	107236848	107237148	0(CAGCTG,+,0.00)	0(CAGCTG,+,0.00)
chr2-45	chr2	154426614	154426914	-109(CAGCTG,+,0.00),0(CAGCTG,+,0.00),26(CAGCTG,+,0.00)	-109(CAGCTG,+,0.00),0(CAGCTG,+,0.00),26(CAGCTG,+,0.00)
chr8-37	chr8	113405304	113405604	0(CAGCTG,+,0.00),141(CAGATG,+,0.00)	0(CAGCTG,+,0.00)	141(CAGATG,+,0.00)
chr13-26	chr13	113706270	113706570	-141(CAGATG,+,0.00),0(CAGCTG,+,0.00)	0(CAGCTG,+,0.00)	-141(CAGATG,+,0.00)
chr8-38	chr8	122523079	122523379	-55(CAGATG,+,0.00),0(CAGCTG,+,0.00)	0(CAGCTG,+,0.00)	-55(CAGATG,+,0.00)
chr1-34	chr1	52150024	52150324	0(CAGATG,+,0.00),117(CATCTG,+,0.00)		0(CAGATG,+,0.00)	117(CATCTG,+,0.00)
chr13-27	chr13	28718435	28718735	-44(CAGATG,+,0.00),0(CATCTG,+,0.00)		-44(CAGATG,+,0.00)	0(CATCTG,+,0.00)
chr9-41	chr9	74860512	74860812	0(CATCTG,+,0.00)			0(CATCTG,+,0.00)
chr6-23	chr6	112603975	112604275	0(CATCTG,+,0.00)			0(CATCTG,+,0.00)
chr13-32	chr13	113858674	113858974	-135(CAGCTG,+,0.00),0(CAGATG,+,0.00)	-135(CAGCTG,+,0.00)	0(CAGATG,+,0.00)
chr16-22	chr16	45724821	45725121	0(CAGCTG,+,0.00),52(CATCTG,+,0.00)	0(CAGCTG,+,0.00)		52(CATCTG,+,0.00)
chr9-42	chr9	84295814	84296114	0(CAGATG,+,0.00),20(CATATG,+,0.00)		0(CAGATG,+,0.00)		20(CATATG,+,0.00)
chr1-39	chr1	157101478	157101778	-86(CAGCTG,+,0.00),-33(CAGCTG,+,0.00),0(CAGATG,+,0.00),27(CAGCTG,+,0.00)	-86(CAGCTG,+,0.00),-33(CAGCTG,+,0.00),27(CAGCTG,+,0.00)	0(CAGATG,+,0.00)
chr18-15	chr18	38903846	38904146	0(CAGCTG,+,0.00),73(CATCTG,+,0.00)	0(CAGCTG,+,0.00)		73(CATCTG,+,0.00)
chr5-23	chr5	142924435	142924735	0(CATCTG,+,0.00),53(CAGATG,+,0.00)		53(CAGATG,+,0.00)	0(CATCTG,+,0.00)
chr16-24	chr16	85528279	85528579	-74(CAGCTG,+,0.00),0(CAGATG,+,0.00)	-74(CAGCTG,+,0.00)	0(CAGATG,+,0.00)
chr14-16	chr14	123660125	123660425	-59(CATCTG,+,0.00),0(CAGCTG,+,0.00),98(CAGCTG,+,0.00)	0(CAGCTG,+,0.00),98(CAGCTG,+,0.00)		-59(CATCTG,+,0.00)
chr6-25	chr6	38730495	38730795	0(CAGCTG,+,0.00)	0(CAGCTG,+,0.00)
chr1-42	chr1	4970696	4970996	0(CATCTG,+,0.00)			0(CATCTG,+,0.00)
chr2-47	chr2	146073307	146073607	0(CAGCTG,+,0.00)	0(CAGCTG,+,0.00)
chr19-9	chr19	46518540	46518840	-74(CAGCTG,+,0.00),-63(CAGCTG,+,0.00),-38(CAGCTG,+,0.00),0(CAGCTG,+,0.00),126(CATCTG,+,0.00)	-74(CAGCTG,+,0.00),-63(CAGCTG,+,0.00),-38(CAGCTG,+,0.00),0(CAGCTG,+,0.00)		126(CATCTG,+,0.00)
chr6-26	chr6	7971031	7971331	-43(CATCTG,+,0.00),0(CATCTG,+,0.00)			-43(CATCTG,+,0.00),0(CATCTG,+,0.00)
chr1-40	chr1	165653545	165653845	0(CAGATG,+,0.00),86(CAGATG,+,0.00),140(CATCTG,+,0.00)		0(CAGATG,+,0.00),86(CAGATG,+,0.00)	140(CATCTG,+,0.00)
chr4-43	chr4	8956378	8956678	0(CAGATG,+,0.00)		0(CAGATG,+,0.00)
chr12-16	chr12	86498764	86499064	0(CAGCTG,+,0.00),73(CATCTG,+,0.00)	0(CAGCTG,+,0.00)		73(CATCTG,+,0.00)
chr15-21	chr15	96333474	96333774	-20(CAGCTG,+,0.00),0(CAGCTG,+,0.00),123(CATCTG,+,0.00)	-20(CAGCTG,+,0.00),0(CAGCTG,+,0.00)		123(CATCTG,+,0.00)
chr4-51	chr4	149445371	149445671	-69(CAGCTG,+,0.00),0(CAGCTG,+,0.00)	-69(CAGCTG,+,0.00),0(CAGCTG,+,0.00)
chr15-23	chr15	91078124	91078424	0(CAGCTG,+,0.00)	0(CAGCTG,+,0.00)
chr1-44	chr1	18831129	18831429	-139(CATCTG,+,0.00),0(CAGCTG,+,0.00)	0(CAGCTG,+,0.00)		-139(CATCTG,+,0.00)
chr10-20	chr10	23195384	23195684	0(CAGCTG,+,0.00)	0(CAGCTG,+,0.00)
chr10-22	chr10	19404501	19404801	-113(CATATG,+,0.00),0(CAGCTG,+,0.00)	0(CAGCTG,+,0.00)			-113(CATATG,+,0.00)
chr9-43	chr9	65094369	65094669	-71(CAGCTG,+,0.00),0(CAGATG,+,0.00)	-71(CAGCTG,+,0.00)	0(CAGATG,+,0.00)
chr16-27	chr16	17208783	17209083	-33(CAGCTG,+,0.00),0(CAGCTG,+,0.00),12(CATCTG,+,0.00),57(CAGCTG,+,0.00),102(CAGCTG,+,0.00),135(CAGCTG,+,0.00)	-33(CAGCTG,+,0.00),0(CAGCTG,+,0.00),57(CAGCTG,+,0.00),102(CAGCTG,+,0.00),135(CAGCTG,+,0.00)		12(CATCTG,+,0.00)
chr19-10	chr19	47019389	47019689	-133(CAGATG,+,0.00),-74(CAGATG,+,0.00),-53(CAGCTG,+,0.00),0(CAGCTG,+,0.00)	-53(CAGCTG,+,0.00),0(CAGCTG,+,0.00)	-133(CAGATG,+,0.00),-74(CAGATG,+,0.00)
chr16-30	chr16	73120592	73120892	0(CAGCTG,+,0.00),18(CATCTG,+,0.00)	0(CAGCTG,+,0.00)		18(CATCTG,+,0.00)
chr17-28	chr17	43077116	43077416	-63(CAGATG,+,0.00),0(CAGCTG,+,0.00),36(CAGCTG,+,0.00)	0(CAGCTG,+,0.00),36(CAGCTG,+,0.00)	-63(CAGATG,+,0.00)
chr6-30	chr6	127701108	127701408	-139(CAGCTG,+,0.00),0(CAGATG,+,0.00),11(CATCTG,+,0.00)	-139(CAGCTG,+,0.00)	0(CAGATG,+,0.00)	11(CATCTG,+,0.00)
chr16-25	chr16	57175531	57175831	-112(CATATG,+,0.00),0(CATCTG,+,0.00)			0(CATCTG,+,0.00)	-112(CATATG,+,0.00)
chr13-35	chr13	9329352	9329652	0(CAGCTG,+,0.00),41(CAGCTG,+,0.00)	0(CAGCTG,+,0.00),41(CAGCTG,+,0.00)
chr11-91	chr11	88689760	88690060	-51(CAGCTG,+,0.00),0(CAGCTG,+,0.00)	-51(CAGCTG,+,0.00),0(CAGCTG,+,0.00)
chr7-31	chr7	119861773	119862073	-64(CATCTG,+,0.00),0(CATCTG,+,0.00),44(CAGATG,+,0.00)		44(CAGATG,+,0.00)	-64(CATCTG,+,0.00),0(CATCTG,+,0.00)
chr11-90	chr11	66932810	66933110	-55(CATCTG,+,0.00),0(CAGCTG,+,0.00)	0(CAGCTG,+,0.00)		-55(CATCTG,+,0.00)
chr14-21	chr14	28958668	28958968	-48(CAGCTG,+,0.00),0(CATCTG,+,0.00),38(CAGCTG,+,0.00),55(CAGCTG,+,0.00)	-48(CAGCTG,+,0.00),38(CAGCTG,+,0.00),55(CAGCTG,+,0.00)		0(CATCTG,+,0.00)
chr13-36	chr13	92611994	92612294	-149(CATCTG,+,0.00),0(CAGCTG,+,0.00)	0(CAGCTG,+,0.00)		-149(CATCTG,+,0.00)
chr3-30	chr3	17489718	17490018	0(CAGATG,+,0.00)		0(CAGATG,+,0.00)
chr4-62	chr4	133040607	133040907	0(CAGATG,+,0.00)		0(CAGATG,+,0.00)
chr15-25	chr15	25027164	25027464	0(CAGCTG,+,0.00),12(CAGCTG,+,0.00)	0(CAGCTG,+,0.00),12(CAGCTG,+,0.00)
chr18-19	chr18	45015611	45015911	0(CAGATG,+,0.00)		0(CAGATG,+,0.00)
chr11-88	chr11	22610407	22610707	0(CATCTG,+,0.00)			0(CATCTG,+,0.00)
chr12-23	chr12	25124746	25125046	-109(CATATG,+,0.00),0(CAGATG,+,0.00)		0(CAGATG,+,0.00)		-109(CATATG,+,0.00)
chr11-96	chr11	26931788	26932088	0(CAGATG,+,0.00)		0(CAGATG,+,0.00)
chr8-46	chr8	10925539	10925839	0(CAGATG,+,0.00)		0(CAGATG,+,0.00)
chr1-48	chr1	34007073	34007373	0(CAGATG,+,0.00)		0(CAGATG,+,0.00)
chr9-51	chr9	94670291	94670591	-51(CAGCTG,+,0.00),0(CAGCTG,+,0.00),131(CATCTG,+,0.00)	-51(CAGCTG,+,0.00),0(CAGCTG,+,0.00)		131(CATCTG,+,0.00)
chr9-48	chr9	105915210	105915510	0(CAGATG,+,0.00)		0(CAGATG,+,0.00)
chr12-27	chr12	39998116	39998416	0(CAGATG,+,0.00)		0(CAGATG,+,0.00)
chr2-54	chr2	29835408	29835708	-148(CAGATG,+,0.00),0(CAGCTG,+,0.00)	0(CAGCTG,+,0.00)	-148(CAGATG,+,0.00)
chr18-21	chr18	81251944	81252244	-54(CATCTG,+,0.00),0(CAGCTG,+,0.00)	0(CAGCTG,+,0.00)		-54(CATCTG,+,0.00)
chr5-36	chr5	113420699	113420999	0(CAGATG,+,0.00),10(CAGCTG,+,0.00),45(CAGCTG,+,0.00)	10(CAGCTG,+,0.00),45(CAGCTG,+,0.00)	0(CAGATG,+,0.00)
chr3-27	chr3	31000104	31000404	-100(CAGCTG,+,0.00),0(CAGCTG,+,0.00)	-100(CAGCTG,+,0.00),0(CAGCTG,+,0.00)
chr9-58	chr9	37054202	37054502	0(CAGCTG,+,0.00),11(CAGCTG,+,0.00)	0(CAGCTG,+,0.00),11(CAGCTG,+,0.00)
chr6-36	chr6	90232175	90232475	0(CAGATG,+,0.00),51(CAGATG,+,0.00)		0(CAGATG,+,0.00),51(CAGATG,+,0.00)
chr9-61	chr9	102690128	102690428	0(CATCTG,+,0.00)			0(CATCTG,+,0.00)
chr7-38	chr7	143437888	143438188	-64(CATCTG,+,0.00),0(CATCTG,+,0.00)			-64(CATCTG,+,0.00),0(CATCTG,+,0.00)
chr4-60	chr4	33823916	33824216	-66(CATCTG,+,0.00),-34(CATATG,+,0.00),0(CAGATG,+,0.00)		0(CAGATG,+,0.00)	-66(CATCTG,+,0.00)	-34(CATATG,+,0.00)
chr10-30	chr10	21701731	21702031	-115(CATATG,+,0.00),0(CAGCTG,+,0.00)	0(CAGCTG,+,0.00)			-115(CATATG,+,0.00)
chr5-38	chr5	37246592	37246892	0(CAGATG,+,0.00)		0(CAGATG,+,0.00)
chr12-25	chr12	26068149	26068449	-133(CAGCTG,+,0.00),-46(CAGCTG,+,0.00),0(CAGCTG,+,0.00),90(CAGATG,+,0.00)	-133(CAGCTG,+,0.00),-46(CAGCTG,+,0.00),0(CAGCTG,+,0.00)	90(CAGATG,+,0.00)
chr10-32	chr10	30729518	30729818	0(CAGATG,+,0.00)		0(CAGATG,+,0.00)
chr11-100	chr11	10087971	10088271	0(CAGATG,+,0.00)		0(CAGATG,+,0.00)
chr7-37	chr7	6770213	6770513	0(CAGCTG,+,0.00)	0(CAGCTG,+,0.00)
chr8-56	chr8	56614959	56615259	-89(CATCTG,+,0.00),0(CAGCTG,+,0.00),23(CAGATG,+,0.00)	0(CAGCTG,+,0.00)	23(CAGATG,+,0.00)	-89(CATCTG,+,0.00)
chr3-39	chr3	118500288	118500588	-11(CATCTG,+,0.00),0(CAGCTG,+,0.00)	0(CAGCTG,+,0.00)		-11(CATCTG,+,0.00)
chr14-30	chr14	21088683	21088983	0(CAGATG,+,0.00)		0(CAGATG,+,0.00)
chr7-41	chr7	132616521	132616821	-58(CATCTG,+,0.00),0(CATCTG,+,0.00)			-58(CATCTG,+,0.00),0(CATCTG,+,0.00)
chr2-69	chr2	45736319	45736619	-42(CAGATG,+,0.00),-27(CATATG,+,0.00),0(CAGCTG,+,0.00)	0(CAGCTG,+,0.00)	-42(CAGATG,+,0.00)		-27(CATATG,+,0.00)
chr15-27	chr15	91018592	91018892	-69(CATCTG,+,0.00),0(CAGATG,+,0.00)		0(CAGATG,+,0.00)	-69(CATCTG,+,0.00)
chr10-38	chr10	109684592	109684892	-23(CAGATG,+,0.00),0(CAGCTG,+,0.00)	0(CAGCTG,+,0.00)	-23(CAGATG,+,0.00)
chr8-57	chr8	68368407	68368707	0(CATCTG,+,0.00),117(CAGCTG,+,0.00)	117(CAGCTG,+,0.00)		0(CATCTG,+,0.00)
chr2-68	chr2	27505601	27505901	0(CATCTG,+,0.00)			0(CATCTG,+,0.00)
chr8-59	chr8	36155458	36155758	0(CAGCTG,+,0.00),65(CAGCTG,+,0.00)	0(CAGCTG,+,0.00),65(CAGCTG,+,0.00)
chr1-65	chr1	74295660	74295960	-40(CAGCTG,+,0.00),0(CAGCTG,+,0.00)	-40(CAGCTG,+,0.00),0(CAGCTG,+,0.00)
chr1-62	chr1	59697773	59698073	0(CAGCTG,+,0.00)	0(CAGCTG,+,0.00)
chr10-37	chr10	41467359	41467659	0(CAGCTG,+,0.00)	0(CAGCTG,+,0.00)
chr6-42	chr6	140337012	140337312	0(CAGCTG,+,0.00)	0(CAGCTG,+,0.00)
chr13-45	chr13	20041222	20041522	0(CAGCTG,+,0.00)	0(CAGCTG,+,0.00)
chrX-11	chrX	85077627	85077927	0(CATCTG,+,0.00)			0(CATCTG,+,0.00)
chr14-29	chr14	124033356	124033656	0(CAGCTG,+,0.00)	0(CAGCTG,+,0.00)
chr10-36	chr10	20153656	20153956	-80(CATCTG,+,0.00),-67(CAGCTG,+,0.00),0(CAGCTG,+,0.00)	-67(CAGCTG,+,0.00),0(CAGCTG,+,0.00)		-80(CATCTG,+,0.00)
chr4-72	chr4	38424536	38424836	0(CATCTG,+,0.00)			0(CATCTG,+,0.00)
chr3-38	chr3	95675477	95675777	0(CATCTG,+,0.00)			0(CATCTG,+,0.00)
chr2-78	chr2	163433955	163434255	0(CAGATG,+,0.00)		0(CAGATG,+,0.00)
chr6-43	chr6	7753070	7753370	0(CAGCTG,+,0.00)	0(CAGCTG,+,0.00)
chr18-27	chr18	17418927	17419227	0(CAGCTG,+,0.00)	0(CAGCTG,+,0.00)
chr4-77	chr4	120850998	120851298	0(CAGATG,+,0.00)		0(CAGATG,+,0.00)
chr1-66	chr1	75588904	75589204	-33(CAGCTG,+,0.00),0(CAGATG,+,0.00)	-33(CAGCTG,+,0.00)	0(CAGATG,+,0.00)
chr16-43	chr16	32637121	32637421	-82(CAGATG,+,0.00),0(CAGCTG,+,0.00)	0(CAGCTG,+,0.00)	-82(CAGATG,+,0.00)
chr1-67	chr1	92432157	92432457	-87(CAGCTG,+,0.00),0(CAGATG,+,0.00),24(CATCTG,+,0.00)	-87(CAGCTG,+,0.00)	0(CAGATG,+,0.00)	24(CATCTG,+,0.00)
chr17-38	chr17	25756892	25757192	-115(CATCTG,+,0.00),-53(CAGATG,+,0.00),0(CATCTG,+,0.00)		-53(CAGATG,+,0.00)	-115(CATCTG,+,0.00),0(CATCTG,+,0.00)
chr7-44	chr7	66292916	66293216	0(CAGCTG,+,0.00),25(CAGCTG,+,0.00)	0(CAGCTG,+,0.00),25(CAGCTG,+,0.00)
chr4-83	chr4	106866794	106867094	0(CAGATG,+,0.00)		0(CAGATG,+,0.00)
chr7-48	chr7	98361480	98361780	-22(CAGATG,+,0.00),0(CATCTG,+,0.00)		-22(CAGATG,+,0.00)	0(CATCTG,+,0.00)
chr12-33	chr12	16850841	16851141	0(CAGCTG,+,0.00)	0(CAGCTG,+,0.00)
chr11-103	chr11	16591516	16591816	0(CAGCTG,+,0.00)	0(CAGCTG,+,0.00)
chr18-26	chr18	65565631	65565931	0(CAGATG,+,0.00),115(CAGCTG,+,0.00)	115(CAGCTG,+,0.00)	0(CAGATG,+,0.00)
chr8-68	chr8	32293186	32293486	-32(CAGATG,+,0.00),0(CATCTG,+,0.00)		-32(CAGATG,+,0.00)	0(CATCTG,+,0.00)
chr2-81	chr2	102121813	102122113	0(CAGATG,+,0.00)		0(CAGATG,+,0.00)
chr7-51	chr7	85542196	85542496	0(CAGATG,+,0.00)		0(CAGATG,+,0.00)
chr6-45	chr6	108259715	108260015	0(CAGATG,+,0.00)		0(CAGATG,+,0.00)
chr16-41	chr16	28809104	28809404	0(CAGATG,+,0.00),89(CAGCTG,+,0.00)	89(CAGCTG,+,0.00)	0(CAGATG,+,0.00)
chr17-40	chr17	15990276	15990576	-57(CAGCTG,+,0.00),0(CAGCTG,+,0.00)	-57(CAGCTG,+,0.00),0(CAGCTG,+,0.00)
chr15-32	chr15	74955474	74955774	0(CAGATG,+,0.00)		0(CAGATG,+,0.00)
chr8-76	chr8	41239281	41239581	-111(CATCTG,+,0.00),0(CATCTG,+,0.00)			-111(CATCTG,+,0.00),0(CATCTG,+,0.00)
chr5-44	chr5	101426089	101426389	0(CATCTG,+,0.00)			0(CATCTG,+,0.00)
chr18-33	chr18	35815534	35815834	0(CATCTG,+,0.00),26(CAGCTG,+,0.00)	26(CAGCTG,+,0.00)		0(CATCTG,+,0.00)
chr2-84	chr2	45001646	45001946	0(CAGATG,+,0.00)		0(CAGATG,+,0.00)
chr8-55	chr8	27236329	27236629	-71(CAGATG,+,0.00),0(CAGATG,+,0.00),9(CAGATG,+,0.00)		-71(CAGATG,+,0.00),0(CAGATG,+,0.00),9(CAGATG,+,0.00)
chr9-70	chr9	8035582	8035882	-75(CAGCTG,+,0.00),0(CAGCTG,+,0.00)	-75(CAGCTG,+,0.00),0(CAGCTG,+,0.00)
chr10-40	chr10	61415761	61416061	0(CAGATG,+,0.00),80(CAGCTG,+,0.00)	80(CAGCTG,+,0.00)	0(CAGATG,+,0.00)
chr9-72	chr9	46328711	46329011	0(CAGATG,+,0.00)		0(CAGATG,+,0.00)
chr14-37	chr14	49447800	49448100	-81(CAGATG,+,0.00),-50(CATATG,+,0.00),0(CATCTG,+,0.00)		-81(CAGATG,+,0.00)	0(CATCTG,+,0.00)	-50(CATATG,+,0.00)
chr15-31	chr15	81831531	81831831	-20(CAGATG,+,0.00),0(CAGCTG,+,0.00)	0(CAGCTG,+,0.00)	-20(CAGATG,+,0.00)
chr2-87	chr2	154428072	154428372	-65(CAGCTG,+,0.00),0(CATCTG,+,0.00),25(CAGCTG,+,0.00)	-65(CAGCTG,+,0.00),25(CAGCTG,+,0.00)		0(CATCTG,+,0.00)
chr12-34	chr12	88214635	88214935	-85(CAGATG,+,0.00),-55(CAGATG,+,0.00),0(CAGCTG,+,0.00),18(CATCTG,+,0.00)	0(CAGCTG,+,0.00)	-85(CAGATG,+,0.00),-55(CAGATG,+,0.00)	18(CATCTG,+,0.00)
chr13-50	chr13	59656892	59657192	0(CAGCTG,+,0.00),8(CATCTG,+,0.00)	0(CAGCTG,+,0.00)		8(CATCTG,+,0.00)
chr3-52	chr3	49769343	49769643	0(CATCTG,+,0.00),114(CATCTG,+,0.00)			0(CATCTG,+,0.00),114(CATCTG,+,0.00)
chr8-83	chr8	118394281	118394581	0(CATCTG,+,0.00),25(CAGCTG,+,0.00)	25(CAGCTG,+,0.00)		0(CATCTG,+,0.00)
chr8-77	chr8	92134213	92134513	0(CATCTG,+,0.00),69(CAGCTG,+,0.00)	69(CAGCTG,+,0.00)		0(CATCTG,+,0.00)
chr8-84	chr8	3414817	3415117	0(CAGCTG,+,0.00),14(CATATG,+,0.00)	0(CAGCTG,+,0.00)			14(CATATG,+,0.00)
chr2-89	chr2	124641186	124641486	0(CATATG,+,0.00),21(CATCTG,+,0.00)			21(CATCTG,+,0.00)	0(CATATG,+,0.00)
chr14-46	chr14	117337302	117337602	0(CAGCTG,+,0.00),15(CATCTG,+,0.00)	0(CAGCTG,+,0.00)		15(CATCTG,+,0.00)
chr8-89	chr8	106150064	106150364	0(CAGCTG,+,0.00)	0(CAGCTG,+,0.00)
chr12-45	chr12	118650828	118651128	0(CAGCTG,+,0.00),20(CAGCTG,+,0.00)	0(CAGCTG,+,0.00),20(CAGCTG,+,0.00)
chr2-79	chr2	180227375	180227675	-110(CAGCTG,+,0.00),-23(CATCTG,+,0.00),0(CAGCTG,+,0.00)	-110(CAGCTG,+,0.00),0(CAGCTG,+,0.00)		-23(CATCTG,+,0.00)
chr16-46	chr16	11254365	11254665	0(CATCTG,+,0.00)			0(CATCTG,+,0.00)
chr18-39	chr18	73665419	73665719	0(CAGCTG,+,0.00),69(CAGCTG,+,0.00)	0(CAGCTG,+,0.00),69(CAGCTG,+,0.00)
chr8-92	chr8	31121393	31121693	0(CAGCTG,+,0.00),45(CAGCTG,+,0.00)	0(CAGCTG,+,0.00),45(CAGCTG,+,0.00)
chr14-43	chr14	105628692	105628992	-88(CATCTG,+,0.00),0(CAGATG,+,0.00),51(CAGCTG,+,0.00)	51(CAGCTG,+,0.00)	0(CAGATG,+,0.00)	-88(CATCTG,+,0.00)
chr7-56	chr7	18923899	18924199	-97(CAGCTG,+,0.00),0(CAGATG,+,0.00),31(CATCTG,+,0.00)	-97(CAGCTG,+,0.00)	0(CAGATG,+,0.00)	31(CATCTG,+,0.00)
chr18-40	chr18	59312695	59312995	0(CAGCTG,+,0.00)	0(CAGCTG,+,0.00)
chr18-37	chr18	42090702	42091002	-115(CAGCTG,+,0.00),0(CAGCTG,+,0.00)	-115(CAGCTG,+,0.00),0(CAGCTG,+,0.00)
chr17-53	chr17	66446211	66446511	0(CAGATG,+,0.00)		0(CAGATG,+,0.00)
chr4-99	chr4	100097553	100097853	0(CAGATG,+,0.00)		0(CAGATG,+,0.00)
chr1-77	chr1	6458003	6458303	0(CAGCTG,+,0.00)	0(CAGCTG,+,0.00)
chr4-98	chr4	54073024	54073324	0(CAGCTG,+,0.00)	0(CAGCTG,+,0.00)
chr1-86	chr1	88668796	88669096	0(CAGCTG,+,0.00),116(CAGATG,+,0.00)	0(CAGCTG,+,0.00)	116(CAGATG,+,0.00)
chr14-49	chr14	70352002	70352302	-137(CAGCTG,+,0.00),0(CAGCTG,+,0.00)	-137(CAGCTG,+,0.00),0(CAGCTG,+,0.00)
chr5-61	chr5	128439845	128440145	-44(CAGCTG,+,0.00),-31(CAGCTG,+,0.00),0(CAGATG,+,0.00),123(CATCTG,+,0.00),140(CATATG,+,0.00)	-44(CAGCTG,+,0.00),-31(CAGCTG,+,0.00)	0(CAGATG,+,0.00)	123(CATCTG,+,0.00)	140(CATATG,+,0.00)
chrX-12	chrX	95881261	95881561	-47(CATCTG,+,0.00),0(CAGCTG,+,0.00)	0(CAGCTG,+,0.00)		-47(CATCTG,+,0.00)
chr11-132	chr11	28734969	28735269	0(CAGCTG,+,0.00)	0(CAGCTG,+,0.00)
chr14-44	chr14	64652648	64652948	0(CAGCTG,+,0.00)	0(CAGCTG,+,0.00)
chr19-22	chr19	7268053	7268353	-8(CAGCTG,+,0.00),0(CATCTG,+,0.00)	-8(CAGCTG,+,0.00)		0(CATCTG,+,0.00)
chr6-50	chr6	58596164	58596464	0(CAGCTG,+,0.00)	0(CAGCTG,+,0.00)
chr6-54	chr6	83421914	83422214	0(CATCTG,+,0.00)			0(CATCTG,+,0.00)
chr10-53	chr10	98749360	98749660	-76(CATCTG,+,0.00),0(CAGCTG,+,0.00)	0(CAGCTG,+,0.00)		-76(CATCTG,+,0.00)
chr4-94	chr4	33198143	33198443	0(CAGCTG,+,0.00)	0(CAGCTG,+,0.00)
chr7-71	chr7	139945650	139945950	0(CAGATG,+,0.00)		0(CAGATG,+,0.00)
chr11-131	chr11	80335714	80336014	-60(CAGCTG,+,0.00),0(CAGCTG,+,0.00)	-60(CAGCTG,+,0.00),0(CAGCTG,+,0.00)
chr13-62	chr13	73259589	73259889	0(CATCTG,+,0.00),34(CAGCTG,+,0.00)	34(CAGCTG,+,0.00)		0(CATCTG,+,0.00)
chr1-92	chr1	136690121	136690421	0(CAGATG,+,0.00)		0(CAGATG,+,0.00)
chr2-94	chr2	146838543	146838843	0(CAGCTG,+,0.00)	0(CAGCTG,+,0.00)
chr2-96	chr2	161166651	161166951	0(CAGCTG,+,0.00)	0(CAGCTG,+,0.00)
chr11-139	chr11	120824769	120825069	0(CATCTG,+,0.00)			0(CATCTG,+,0.00)
chr18-45	chr18	64013953	64014253	0(CATCTG,+,0.00)			0(CATCTG,+,0.00)
chr14-53	chr14	13770718	13771018	-128(CAGCTG,+,0.00),-97(CAGCTG,+,0.00),0(CAGCTG,+,0.00)	-128(CAGCTG,+,0.00),-97(CAGCTG,+,0.00),0(CAGCTG,+,0.00)
chr5-63	chr5	142961982	142962282	-13(CATCTG,+,0.00),0(CATCTG,+,0.00)			-13(CATCTG,+,0.00),0(CATCTG,+,0.00)
chr10-46	chr10	85539895	85540195	-130(CAGCTG,+,0.00),0(CAGCTG,+,0.00)	-130(CAGCTG,+,0.00),0(CAGCTG,+,0.00)
chr17-52	chr17	11092936	11093236	-127(CAGCTG,+,0.00),-55(CAGCTG,+,0.00),0(CAGCTG,+,0.00)	-127(CAGCTG,+,0.00),-55(CAGCTG,+,0.00),0(CAGCTG,+,0.00)
chr12-51	chr12	101016003	101016303	0(CAGCTG,+,0.00)	0(CAGCTG,+,0.00)
chr12-47	chr12	99220385	99220685	-22(CAGCTG,+,0.00),0(CAGATG,+,0.00)	-22(CAGCTG,+,0.00)	0(CAGATG,+,0.00)
chr10-42	chr10	125800656	125800956	-134(CAGCTG,+,0.00),0(CAGATG,+,0.00)	-134(CAGCTG,+,0.00)	0(CAGATG,+,0.00)
chr14-57	chr14	48655067	48655367	-75(CAGCTG,+,0.00),0(CAGCTG,+,0.00)	-75(CAGCTG,+,0.00),0(CAGCTG,+,0.00)
chr2-109	chr2	92947965	92948265	-57(CAGCTG,+,0.00),-51(CAGCTG,+,0.00),0(CAGCTG,+,0.00),99(CAGATG,+,0.00)	-57(CAGCTG,+,0.00),-51(CAGCTG,+,0.00),0(CAGCTG,+,0.00)	99(CAGATG,+,0.00)
chr4-108	chr4	8687950	8688250	0(CAGATG,+,0.00)		0(CAGATG,+,0.00)
chr4-110	chr4	84527106	84527406	-57(CATCTG,+,0.00),0(CAGCTG,+,0.00)	0(CAGCTG,+,0.00)		-57(CATCTG,+,0.00)
chr3-57	chr3	127257625	127257925	0(CAGCTG,+,0.00)	0(CAGCTG,+,0.00)
chr12-52	chr12	25475490	25475790	0(CAGCTG,+,0.00)	0(CAGCTG,+,0.00)
chr4-118	chr4	105223893	105224193	-78(CAGATG,+,0.00),0(CAGCTG,+,0.00)	0(CAGCTG,+,0.00)	-78(CAGATG,+,0.00)
chr12-58	chr12	117039440	117039740	0(CAGATG,+,0.00),107(CAGATG,+,0.00)		0(CAGATG,+,0.00),107(CAGATG,+,0.00)
chr5-73	chr5	134340073	134340373	-123(CAGATG,+,0.00),0(CAGCTG,+,0.00)	0(CAGCTG,+,0.00)	-123(CAGATG,+,0.00)
chr2-106	chr2	45037713	45038013	-147(CAGCTG,+,0.00),-101(CAGATG,+,0.00),0(CATCTG,+,0.00)	-147(CAGCTG,+,0.00)	-101(CAGATG,+,0.00)	0(CATCTG,+,0.00)
chr11-150	chr11	113326424	113326724	-83(CATCTG,+,0.00),-30(CATCTG,+,0.00),0(CAGCTG,+,0.00),66(CAGATG,+,0.00)	0(CAGCTG,+,0.00)	66(CAGATG,+,0.00)	-83(CATCTG,+,0.00),-30(CATCTG,+,0.00)
chr7-78	chr7	108184470	108184770	0(CATCTG,+,0.00)			0(CATCTG,+,0.00)
chr3-60	chr3	143158465	143158765	0(CAGATG,+,0.00),33(CAGATG,+,0.00)		0(CAGATG,+,0.00),33(CAGATG,+,0.00)
chr1-110	chr1	153071598	153071898	0(CAGCTG,+,0.00),11(CAGCTG,+,0.00),22(CAGCTG,+,0.00)	0(CAGCTG,+,0.00),11(CAGCTG,+,0.00),22(CAGCTG,+,0.00)
chr2-102	chr2	41341610	41341910	0(CATATG,+,0.00)				0(CATATG,+,0.00)
chr11-147	chr11	49261294	49261594	0(CATCTG,+,0.00)			0(CATCTG,+,0.00)
chr12-56	chr12	86801147	86801447	0(CAGCTG,+,0.00)	0(CAGCTG,+,0.00)
chr2-116	chr2	75633913	75634213	-43(CATCTG,+,0.00),0(CAGCTG,+,0.00),27(CAGCTG,+,0.00),43(CAGCTG,+,0.00)	0(CAGCTG,+,0.00),27(CAGCTG,+,0.00),43(CAGCTG,+,0.00)		-43(CATCTG,+,0.00)
chr1-102	chr1	136470527	136470827	-56(CAGCTG,+,0.00),0(CATCTG,+,0.00)	-56(CAGCTG,+,0.00)		0(CATCTG,+,0.00)
chr7-84	chr7	143124327	143124627	0(CATCTG,+,0.00)			0(CATCTG,+,0.00)
chr7-77	chr7	90540881	90541181	0(CAGATG,+,0.00)		0(CAGATG,+,0.00)
chr2-110	chr2	138265261	138265561	0(CAGCTG,+,0.00)	0(CAGCTG,+,0.00)
chr12-66	chr12	118659543	118659843	0(CAGCTG,+,0.00)	0(CAGCTG,+,0.00)
chr10-73	chr10	110931245	110931545	0(CATCTG,+,0.00)			0(CATCTG,+,0.00)
chr12-54	chr12	36933271	36933571	-57(CATCTG,+,0.00),0(CATCTG,+,0.00),89(CAGCTG,+,0.00)	89(CAGCTG,+,0.00)		-57(CATCTG,+,0.00),0(CATCTG,+,0.00)
[truncated: 383 more rows]

## Sheet: NEUROD1_closed
PeakID	Chr	Start	End	CAKMTG Distance From Peak(sequence,strand,conservation)	CAGCTG Distance From Peak(sequence,strand,conservation)	CAGATG Distance From Peak(sequence,strand,conservation)	CATCTG Distance From Peak(sequence,strand,conservation)	CATATG Distance From Peak(sequence,strand,conservation)
[truncated: 728 more rows]
